# Supplementary material for: Multiomics reveal unique signatures of human epiploic adipose tissue related to systemic insulin resistance
Source: HighWire-hosted journal article supplement (doi:10.1136/gutjnl-2021-324603), 2021-10-01
Supplement: gutjnl-2021-324603supp001_data_supplement.pdf [file gutjnl-2021-324603supp001_data_supplement.pdf]

1

# 1. Supplementary Methods

## 2 Systemic and AT inflammatory status

### 3 **Adipose Tissue Samples**

4 Biopsies were immediately transferred into sterile vials and cooled on ice until further  
5 processing under sterile laboratory conditions. Aliquots of approximately 100 mg each were  
6 instantly snap-frozen in liquid nitrogen and transferred to long-term storage at -80 °C. RNA  
7 extraction was performed using RNeasy Lipid Tissue Mini Kit (Qiagen, Hilden, Germany)  
8 according to the manufacturer's instructions and RNA was transcribed into cDNA using  
9 SuperScript III (ThermoFisher Scientific, Waltham, MA). DNA was isolated using DNeasy  
10 Tissue Mini Kit (Qiagen), and nucleic acid concentrations were measured on a Quantus  
11 Fluorometer (Promega, Madison, WI).

### 12 **Isolation of adipocytes/ SVF**

13 Samples were digested with collagenase I, which was diluted in HBSS buffer containing 2%  
14 BSA and 1% Penicillin/Streptomycin. Tissues were cut within the buffer on ice and transferred  
15 to gentleMACS C tubes, and run on the gentleMACS Octo dissociator for 40 minutes at 37°  
16 C. Suspension was sifted over a cell strainer to separate SVF from adipocytes (Greiner, #  
17 542070), and SVF fraction was washed with HBSS. After centrifugation (10 minutes, 400 g,  
18 room temperature), supernatant was removed carefully and pellet was resuspended in ery-  
19 lysis buffer for 7 minutes. After a second centrifugation SVF was frozen in 500 µl growth  
20 medium (DMEM with 4.5g/l glucose, 1%Penicillin/Strptomycin, 10% FCS, 0.05 mM ascorbic  
21 acid) and 50 µl DMSO.

### 22 **Blood chemistry**

23 Blood cell counts and routine metabolic markers including glucose, insulin, kidney function  
24 and lipids were measured at the central laboratory unit of the hospital using routine methods.

2

25 High-sensitivity C-reactive protein (hsCRP) was quantified using an Image Automatic  
26 Immunoassay System (Beckman Coulter, Brea, CA) according to the manufacturer's manual.  
27 Tumor necrosis factor alpha (TNF- $\alpha$ ) and interleukin 6 (IL-6) were measured by high-sensitive  
28 ELISA (R&D Systems, Minneapolis, MN; HSTA00E and HS600B) using undiluted serum, and  
29 lipopolysaccharide-binding protein (LBP) was measured by ELISA (Hycult Biotech, Uden,  
30 Netherlands, #HK315-02) using diluted plasma (1:1000) according to the manufacturer's  
31 protocol. In addition, circulating adipokines and apolipoproteins were measured by mass  
32 spectrometry as described previously[1].

33

#### 34 **Immunohistochemistry**

35 Sample aliquots for immunohistochemistry were incubated in 4 % paraformaldehyde in PBS  
36 for 24 h and embedded in paraffin. Slides of 6  $\mu$ m each were used and treated with DAKO  
37 retrieval solution (pH=9, Agilent, Santa Clara, CA) for 30 minutes by applying hot steam.  
38 Adipocytes were stained with anti-perilipin-1 (goat, 1:200, Abcam, Cambridge, UK, #ab61682)  
39 and macrophages with anti-Iba1 (rabbit, 1:500, Fujifilm WAKO, Japan, #019-19741) at 4 °C  
40 overnight. Supervised automated analysis was performed using CellSens software  
41 (OLYMPUS Life Science, Shinjuku, Japan) to assess adipocyte counts and diameter as well  
42 as counts of macrophages.

43

#### 44 **MRI-scan based quantification approach**

45 **Image-based quantification of visceral and subcutaneous adipose tissue (VAT and SAT) by**  
46 **MRI (magnetic resonance imaging) or CT (computed tomography) is a well-established**  
47 **method [2, 3]. The differentiation of adipose tissue compartments in imaging depends on**  
48 **visible anatomic borders, such as muscle, peritoneum, or fascia, that serve as outer limitations**  
49 **for volumetry. In our MRI-based approach to quantify the epiploic adipose tissue volume we**  
50 **found the peritoneal covering too thin to be resolved with imaging. Hence a separation of the**

3

51 epiploic adipose tissue from other VAT compartments – and by that its quantification - was not  
52 feasible (see Supplementary Figure S1C). Findings are in line with previous description based  
53 on CT-images [4].

54

## 55 Sample Preparation

### 56 Methylation studies

57 To assess the DNA methylation status of CpG sites, the human Illumina Infinium Methylation  
58 EPIC array was used according to the manufacturer's instructions (Illumina, San Diego, USA).  
59 250 ng of DNA were bisulfite-converted using the EZ-96 DNA methylation kit (Zymo Research,  
60 Irvine, CA). After isothermal amplification and fragmentation, DNA was hybridized to the array  
61 at 48°C for 16 hours followed by washing, staining, and scanning using the Illumina HiScan  
62 system according to the manufacturer's specifications.

63

### 64 Transcriptomics

65 First, RNA integrity and concentration were examined on an Agilent Fragment Analyzer  
66 (Agilent Technologies, Palo Alto, CA) using the RNA Kit (Agilent Technologies) according to  
67 the manufacturer's instructions. 250 ng of total RNA per sample were ethanol-precipitated with  
68 GlycoBlue (Invitrogen) as a carrier and dissolved to a concentration of 100-150 ng/μl prior to  
69 probe synthesis using the TargetAmp™-Nano Labeling Kit for Illumina Expression BeadChip  
70 (Epicentre Biotechnologies, Madison, WI). 750 ng of cRNA were hybridized to Human HT-12  
71 v4 Expression BeadChips (Illumina, San Diego, CA) and scanned using the Illumina HiScan  
72 instrument according to the manufacturer's specifications.

73

### 74 Proteomics

75 30 μg protein of each sample were precipitated using four volumes of ice-cold acetone. The  
76 mixtures were incubated at -20 °C overnight, then centrifuged at 4 °C for 10 min at 16000 × g,

4

77 and the protein pellet was dried under vacuum. Samples were reconstituted in Laemmli  
78 sample buffer and incubated at 95 °C for 5 min at 1000 rpm, followed by 10 min of sonication.  
79 Protein separation was performed by 1-D SDS-PAGE with 4% stacking gel and 12%  
80 separation gel (Biostep, Burkhardtsdorf, Germany). Gels were stained with Coomassie  
81 Brilliant Blue R-250 dye (Thermo Fisher Scientific, MA). In-gel proteolytic cleavage was  
82 conducted as described previously using trypsin and samples were reconstituted in formic  
83 acid (0.1%, v/v) [5].

84

## 85 Data analysis

### 86 Methylation analysis

87 Processing of methylation data included removing of all probes with low quality (detP>0.01, in  
88 more than 1 data set) and batch correction with R's sva package [6]. Differentially methylated  
89 regions (DMR) analysis in batch corrected betas was performed using metilene with minimum  
90 number of CpGs set to 3 and maximum distance to 1000 [7],[8]. Betas were also assigned to  
91 genes by overlapping with the gencode version 32 mapped to GRCh37 annotation of the  
92 human genome [8]. All CpGs 1500 bp upstream and 500 bp downstream of the transcription  
93 start site were used as a promoter, all other probes intersecting the gene as gene body probes.  
94 DMR finding using metilene (minimum number of CpGs again 3) was performed on these  
95 CpGs, using the genes as pseudo chromosomes, and numbering the CpGs consecutively as  
96 pseudo positions. To be able to easily distinguish between promoter and gene body, 100 was  
97 added to the gene body positions. Heatmaps were created in R using the corrected Beta  
98 values. For IS vs. IR computations, two female and two male datasets for each were chosen  
99 to minimize sex effects.

100

### 101 Micro array analysis

102 Analysis of BeadChip data was performed within the R and differentially expressed genes  
103 were identified with limma v3.40.6 [9]. Transcriptome-based pathway analysis was performed

5

104 using the GSEA software [10] and the KEGG pathway database [11]. Expression of genes  
105 measured by qPCR was normalized to the expression of *GAPDH* and *B2M*, which were  
106 determined as optimal housekeeping genes after extensive testing [12]. Corrected expression  
107 results were calculated using the  $\Delta\Delta C_t$  method [13].

108

### 109 **Proteome analyses**

110 Proteomics data were log<sub>2</sub>-transformed, and proteins were filtered for those, which were  
111 quantified in at least five subjects (Supplementary Table 4) before the calculation of average  
112 fold changes (Supplementary Table 5). For these steps and subsequent visualization of the  
113 results, several packages were used: readxl [14], qpcR [15], plyr [16], splitstackshape [17],  
114 tidyr [14], calibrate [18], circlize [19], gplots [20], ggplot2 [21], and ComplexHeatmap [22]. To  
115 address multiple testing errors, all p values were adjusted by Benjamini & Hochberg, and an  
116 adjusted p < 0.05 was considered significant.

117

118 Principal component analyses (PCAs) of the proteomes and transcriptomes were conducted  
119 using the package mixOmics [23]. To determine outliers, Mahalanobis distances and  
120 respective p-values were calculated using the package ClassDiscovery [24] based on the first  
121 two obtained principal components. A p-value threshold of 0.05 was used to define outliers  
122 (Supplementary Figure 1), which were removed for subsequent analyses.

### 123 **IPA**

124 Ingenuity Pathway Analysis (IPA; Qiagen, Germany) [25] was used for integrated pathway  
125 enrichment analysis with the definition of “human” as organism and selection of AT using  
126 significantly altered proteins and transcripts (adjusted p-value ≤ 0.05). Either proteins,  
127 transcripts, or a combination of both were investigated. Benjamini & Hochberg adjusted p-  
128 values and z-scores were extracted (Supplementary Table 6) and used for visualizations  
129 analyte-based multi-omics integration was performed using the supervised DIABLO  
130 framework in mixOmics [23].

6

131

132 **WGNCA**

133 A Weighted Gene Correlation Network Analysis (WGCNA) [26] was performed on the  
134 integrated transcriptome and proteome data as described previously (Supplementary Table 7;  
135 Supplementary Figure 3) [27]. Results of the WGNCA key driver analysis were visualized  
136 using Cytoscape 3.7.2 [28] and stringApp [29].

137 The *Weighted Gene Correlation Network Analysis* (WGCNA) [26] was performed as follows:  
138 An Analysis of variance (ANOVA) was performed on the processed proteome and  
139 transcriptome data to identify proteins and transcripts, which significantly ( $p\text{-value} \leq 0.05$ )  
140 differed between the tested conditions, resulting in 1511 proteins and 7610 transcripts. Next,  
141 data were filtered for analytes, which were quantified in at least half of the samples, yielding  
142 1399 proteins and 7610 transcripts for WGCNA. Calculations were carried out as previously  
143 described [27] but with the following parameters: A signed network was created with a soft  
144 power threshold of 9 to arrive at network adjacency. The cut height was set to 0.25, minimum  
145 module size to 100, and maximum module size to 500. Fourteen modules were identified and  
146 assigned to different colors (Supplementary Figure 3A). A summary of the analyte-module-  
147 assignment was generated (Supplementary Table 7). For each of the modules, significantly  
148 enriched pathways were determined using IPA as described above, but without defining a  $p$ -  
149 value threshold (Supplementary Table 7). The obtained pathways were filtered based on  
150 significance, and the top two enriched pathways (based on adjusted  $p$ -values) were  
151 determined for each module (Supplementary Table 7). Furthermore, correlations with the  
152 different traits were investigated, and key drivers for epiAT of subjects with IS or IR were  
153 determined using following criteria: gene significance (GS)  $\geq 0.4$ , module membership (MM)  
154  $\geq 0.4$ , connectivity  $\geq 0.1$ , and not only connections to isoforms. Obtained results were  
155 visualized using Cytoscape 3.7.2 [28] and stringApp [29]. Key drivers for all investigated traits  
156 before connectivity filtering can be found in (Supplementary Table 7).

157

7

158 **2. REFERENCES**

- 159 1 Krieg L, Schaffert A, Kern M, et al. An MRM-Based Multiplexed Quantification Assay for  
160 Human Adipokines and Apolipoproteins. *Molecules* 2020;25(4).
- 161 2 Schaudinn A, Hudak A, Linder N, et al. Toward a Routine Assessment of Visceral  
162 Adipose Tissue Volume from Computed Tomographic Data. *Obesity (Silver Spring)*  
163 2021;29(2):294–301. doi:10.1002/oby.23061 [published Online First: 25 December  
164 2020].
- 165 3 Linder N, Schaudinn A, Garnov N, et al. Age and gender specific estimation of visceral  
166 adipose tissue amounts from radiological images in morbidly obese patients. *Sci Rep*  
167 2016;6:22261. doi:10.1038/srep22261 [published Online First: 24 March 2016].
- 168 4 Eberhardt SC, Strickland CD, Epstein KN. Radiology of epiploic appendages: acute  
169 appendagitis, post-infarcted appendages, and imaging natural history. *Abdom Radiol*  
170 (NY) 2016;41(8):1653–65.
- 171 5 Kalkhof S, Förster Y, Schmidt J, et al. Proteomics and metabolomics for in situ  
172 monitoring of wound healing. *Biomed Res Int* 2014;2014:934848.
- 173 6 Leek JT, Johnson WE, Parker HS, et al. The sva package for removing batch effects  
174 and other unwanted variation in high-throughput experiments. *Bioinformatics*  
175 2012;28(6):882–83.
- 176 7 Jühling F, Kretzmer H, Bernhart SH, et al. metilene: fast and sensitive calling of  
177 differentially methylated regions from bisulfite sequencing data. *Genome Res*  
178 2016;26(2):256–62.
- 179 8 Frankish A, Diekhans M, Ferreira A-M, et al. GENCODE reference annotation for the  
180 human and mouse genomes. *Nucleic Acids Research* 2019;47(D1):D766-D773.
- 181 9 Ritchie ME, Phipson B, Di Wu, et al. limma powers differential expression analyses for  
182 RNA-sequencing and microarray studies. *Nucleic Acids Research* 2015;43(7):e47.

8

- 183 10 Subramanian A, Tamayo P, Mootha VK, et al. Gene set enrichment analysis: A  
184 knowledge-based approach for interpreting genome-wide expression profiles. *PNAS*  
185 2005;102(43):15545–50. <https://www.pnas.org/content/pnas/102/43/15545.full.pdf>.
- 186 11 Kanehisa M, Goto S. KEGG: kyoto encyclopedia of genes and genomes. *Nucleic Acids*  
187 *Research* 2000;28(1):27–30.
- 188 12 Massier L, Chakaroun R, Tabei S, et al. Adipose tissue derived bacteria are associated  
189 with inflammation in obesity and type 2 diabetes. *Gut* 2020.  
190 <https://gut.bmj.com/content/early/2020/04/21/gutjnl-2019-320118.info>.
- 191 13 Pfaffl MW. A new mathematical model for relative quantification in real-time RT-PCR.  
192 *Nucleic Acids Research* 2001;29(9):e45.
- 193 14 Hadley Wickham, Mara Averick, Jennifer Bryan, et al. Welcome to the tidyverse.  
194 *Journal of Open Source Software* 2019;4(43):1686.
- 195 15 Spiess A-N. qpcR: Modelling and Analysis of Real-Time PCR Data: Model fitting,  
196 optimal model selection and calculation of various features that are essential in the  
197 analysis of quantitative real-time polymerase chain reaction (qPCR) 2018.
- 198 16 Wickham H. The Split-Apply-Combine Strategy for Data Analysis. *J. Stat. Soft.*  
199 2011;40(1).
- 200 17 Mahto A. splitstackshape: Stack and Reshape Datasets After Splitting Concatenated  
201 Values 2019.
- 202 18 Graffelman J. calibrate: Calibration of Scatterplot and Biplot Axes 2020.
- 203 19 Gu Z, Gu L, Eils R, et al. circlize Implements and enhances circular visualization in R.  
204 *Bioinformatics* 2014;30(19):2811–12.
- 205 20 Gregory R. Warnes, Ben Bolker, Lodewijk Bonebakker, et al. gplots: Various R  
206 Programming Tools for Plotting Data 2020.
- 207 21 Hadley Wickham. ggplot2: Elegant Graphics for Data Analysis 2016.
- 208 22 Gu Z, Eils R, Schlesner M. Complex heatmaps reveal patterns and correlations in  
209 multidimensional genomic data. *Bioinformatics* 2016;32(18):2847–49.



9

- 210 23 Rohart F, Gautier B, Singh A, et al. mixOmics: An R package for 'omics feature  
211 selection and multiple data integration. *PLoS Comput Biol* 2017;13(11).  
212 <https://pubmed.ncbi.nlm.nih.gov/29099853/>.
- 213 24 Coombes KR. ClassDiscovery 2019.
- 214 25 Kramer A, Green J, Pollard J, JR, et al. Causal analysis approaches in Ingenuity  
215 Pathway Analysis. *Bioinformatics* 2014;30(4):523–30.
- 216 26 Langfelder P, Horvath S. WGCNA: an R package for weighted correlation network  
217 analysis. *BMC Bioinformatics* 2008;9:559.
- 218 27 Isabel Karkossa, Anne Bannuscher, Bryan Hellack, et al. An in-depth multi-omics  
219 analysis in RLE-6TN rat alveolar epithelial cells allows for nanomaterial categorization.  
220 *Part Fibre Toxicol* 2019;16(1):1–19.
- 221 28 Shannon P, Markiel A, Ozier O, et al. Cytoscape: a software environment for integrated  
222 models of biomolecular interaction networks. *Genome Res* 2003;13(11):2498–504.
- 223 29 Doncheva NT, Morris JH, Gorodkin J, et al. Cytoscape StringApp: Network Analysis  
224 and Visualization of Proteomics Data. *J Proteome Res* 2019;18(2):623–32.
- 225

10

### 226 3. Supplementary files information

227 **Table S1: Body donors' cohort characteristics**

228 **Table S2: Characteristics of sub-cohort used for multi-omics analyses ( $N_{IR}=9$ ,  $N_{IS}=9$ ,**  
229 **matched for sex, age and BMI)**

230 **Table S3: Characteristics of sub-cohort used for transcriptomics ( $N_{IR}=15$ ,  $N_{IS}=9$ ,**  
231 **matched for sex, age and BMI)**

232 **Table S4: List of Taqman Probes**

233 **Table S5: Quantification of adipose tissue SVF cell populations via FACS ; cohort**  
234 **characteristics of subjects included in FACS characterization of EpiAT**

235 **Table S6: Gene expression data in the different adipose tissues**

236 **Table S7: identified proteins and genes in each patient.**

237 **and gene significances together with identified key drivers in the different adipose tissues.**

238 **Table S8: FCs and p-values obtained from proteomics and transcriptomics.**

239 **Table S9: Methylation data.**

240 **Table S10: Summary of enriched IPA pathways for proteome, transcriptome and of**  
241 **integrative analysis.**

242 **Table S11: characteristics of adipocytes donors**

243 **Table S12: Weighted Gene Correlation Network Analysis (WGCNA) results; Lists of**  
244 **analytes and their assignment to the obtained modules, as summary of enriched IPA pathways**  
245 **for each module and the calculated module memberships**

11

246 **Figure S1 (referring to Figure 2).** (A) Gating strategy of FACS analysis, (B) FACS analysis  
247 of AT SVF (n=7) for immune cell populations (remaining clusters), shown are individual  
248 observations, median and upper and lower quartiles, paired Mann-Whitney-*U*-test, bars above  
249 boxplots indicate comparisons, p-values are listed above comparison-bars (C) MR-image (T1-  
250 weighted gradient echo inphase sequence) of a 40-year-old female study patient in transversal  
251 orientation at the level of lumbar vertebrae 3. Visceral adipose tissue (VAT) and subcutaneous  
252 adipose tissue (SAT) are separated by muscle. Yet there is no adequate peritoneal coverage  
253 thick enough to be distinguished as borders of epiploic adipose tissue (arrows)

254 **Figure S2 (referring to Figure 3).** Outliers defined by Mahalanobis distance for transcriptome  
255 data (A) and proteome data (B), gene set enrichment analysis using KEGG for epiAT vs scAT  
256 (C) and epiAT vs mesAT (D), adipocyte specific expression of LEP in an independent cohort  
257 (E), cell type specific expression pattern of highlighted genes (F)

258 **Figure S3 (referring to Figure 4).** (A) Overlap between reliably quantified and significantly  
259 altered transcripts/proteins between epiAT and omAT, (B) heatmap of marker for brown and  
260 white AT based on Perdikari et al. and (C) heatmap for markers of beige AT based on  
261 Pilkington et al.

262 **Figure S4 (referring to Figure 5).** (A) KEGG pathways based on transcriptome data  
263 differentially enriched in patient with or without IR, shown as normalized enrichment score  
264 (NES), (B) FACS quantification of immune cell population between patients with and without  
265 T2D

266 **Figure S5 (referring to Figure 6).** Overlap between differentially regulated analytes between  
267 IS and IR in epiAT for chemokine signaling pathway (A), toll like receptor signaling pathway  
268 (B), B cell receptor pathway (C), leukocyte transendothelial migration (D), as well as  
269 generalized for all significantly altered KEGG pathways (E)

270 **Figure S6 (referring to Figure 7).** (A) WGCNA: cluster dendrogram, (B) WGCNA: module-  
271 trait correlations of cluster eigengenes, (C) key driver analysis of IS epiAT (yellow module

12

272
