# Supplementary material for: Multiomics reveal unique signatures of human epiploic adipose tissue related to systemic insulin resistance
Source: HighWire-hosted journal article supplement (doi:10.1136/gutjnl-2021-324603), 2021-10-01
Supplement: gutjnl-2021-324603supp002_data_supplement.xlsx [file gutjnl-2021-324603supp002_data_supplement.xlsx]

## Sheet: Sheet1
Institute	Collection	anatomist	sex	age	weight	height	BMI	omentum	appendices	spleen	omentum	appendices	appendices	cause of death	ICD-10	ICD-10
	date			(years)	(kg)	(m)		(g)	(g)	(g)	(% spleen)	(% spleen)	(% omentum)
LEIPZIG	2021-05-27	MG	weiblich	99	40	1.62	15.2416	65	49	95	68.4211	51.5789	75.3846	Herzinsuffizienz		Niereninsuffizienz Stad. IV, Kolonkarzinom, Anus praeter
	2021-06-22	MG	weiblich	95	37	1.51	16.2274	111	13	109	101.835	11.9266	11.7117	Verbluten aus Varizen li. Bein	I83.0, D68.3, I10.0	Varicose veins of lower extremities with ulcer ; Haemorrhagic disorder due to circulating anticoagulants ; Essential (primary) hypertension
	2021-05-27	MG	weiblich	86	45	1.65	16.5289	94	42	112	83.9286	37.5	44.6809	Demenz		M. Parkinson, arterielle Hypertonie
	2021-05-27	MG	weiblich	93	45	1.63	16.937	129	60	123	104.878	48.7805	46.5116	Herzversagen
	2021-06-22	MG	weiblich	93	33	1.39	17.0799	45	6	87	51.7241	6.89655	13.3333	Exikkose	E86, R64, F03.0, S72,8, I10.9,E03.9	Volume depletion ; Cachexia ; Unspecified dementia ; Fractures of other parts of femur ; Essential (primary) hypertension ; Hypothyroidism, unspecified
	2021-05-14	MG	weiblich	85	50	1.71	17.0993	34	68	67	50.7463	101.493	200	Tumoranämie	C30.9, C78.7, C79.5, D63	Malignant neoplasm of nasal cavity and middle ear, unspecified ; Secondary malignant neoplasm of liver and intrahepatic bile duct ; Secondary malignant neoplasm of bone and bone marrow ; Anaemia in chronic diseases classified elsewhere
	2021-05-27	MG	männlich	80	50	1.7	17.301	187	67	159	117.61	42.1384	35.8289	Leberkarzinom
	2021-05-14	MG	männlich	77	53	1.72	17.9151	54	18				33.3333	chronische Niereninsuffizienz	N18.3, N18.5, C61	Chronic kidney disease, stage 3 ; Chronic kidney disease, stage 5 ; Malignant neoplasm of prostate
	2021-05-27	MG	männlich	93	53	1.7	18.3391	119	47	76	156.579	61.8421	39.4958	Hirninfarkt		Atherosklerose, Arterielle Hypertonie, Dementielles Syndrom, Schizophrenie, progressive subkortikale Enzephalopathie
	2021-06-22	MG	weiblich	89	41	1.49	18.4676	93	60	63	147.619	95.2381	64.5161	prärenales Nierenversagen	N19, E86, E11.9, I10.90, I77.1	Unspecified kidney failure ; Volume depletion ; Type 2 diabetes mellitus ; Essential (primary) hypertension ; Defects in glycoprotein degradation
	2021-05-27	MG	männlich	87	60	1.75	19.5918	125	61	223	56.0538	27.3543	48.8	Tumoranämie		Prostatakarzinom, Knochenmetastasen
	2021-06-22	MG	männlich	75	52	1.61	20.061	297	162	89	333.708	182.022	54.5455	Aspirationspneumonie	J18.9, G20.90, E14.90, N18.3	Pneumonia, unspecified ; Parkinson disease ; Unspecified diabetes mellitus ; Chronic kidney disease, stage 3
	2021-06-22	MG	männlich	71	49	1.56	20.1348	232	79	330	70.303	23.9394	34.0517	Herzversagen	I50.9, I25.9, I10	Heart failure, unspecified, Chronic ischaemic heart disease, unspecified, Essential (primary) hypertension
	2021-05-14	MK	weiblich	85	46	1.49	20.7198	88	35	57	154.386	61.4035	39.7727	Demenz	F01.2, I67.2, I11.0	Subcortical vascular dementia ; Cerebral atherosclerosis ; Hypertensive heart disease with (congestive) heart failure
	2021-05-14	MG	weiblich	82	48	1.51	21.0517	149	53	168	88.6905	31.5476	35.5705	Hypostatische Pneumonie	J18.0, I50.9, I48.9, I63.9	Bronchopneumonia, unspecified ; Heart failure, unspecified ; Atrial fibrillation and atrial flutter, unspecified ; Cerebral infarction, unspecified
	2021-06-22	MG	männlich	93	56	1.63	21.0772	378	243	77	490.909	315.584	64.2857	dekompnsierte Herzinsuffizienz	I 50.9; I25.0; I 10.9; F03, Z95.0	Heart failure, unspecified ; Atherosclerotic cardiovascular disease, so described ; Unspecified dementia ; Presence of electronic cardiac devices
	2021-06-22	MG	weiblich	83	42	1.41	21.1257	188	154	207	90.8213	74.3961	81.9149	respiratorische Insuffizienz	J96.9, J18.9, I63.9	Respiratory failure, unspecified ; Pneumonia, unspecified ; Cerebral infarction, unspecified
	2021-05-14	MK	weiblich	83	55	1.61	21.2183	168	41	163	103.067	25.1534	24.4048	Alimentärer Marasmus	E41.0, C34.9, C90.3, I48.9, H49.1	Nutritional marasmus ; Malignant neoplasm of bronchus and lung, unspecified ; Solitary plasmacytoma ; Atrial fibrillation and atrial flutter, unspecified ; Fourth [trochlear] nerve palsy
	2021-05-27	MG	männlich	73	62	1.7	21.4533	440	347	388	113.402	89.433	78.8636	respiratorische Insuffizienz		Sepsis, Multiples Myelom
	2021-05-27	MG	weiblich	83	60	1.65	22.0386	116	30	132	87.8788	22.7273	25.8621	Sepsis		Pyelonephritis, Nierenstein, Niereninsuffizienz
	2021-05-14	MK	männlich	76	59	1.63	22.2063	277	192	109	254.128	176.147	69.3141	intracerebrale Blutung links	D68.3, I61.9, I70.2, I65.2	Haemorrhagic disorder due to circulating anticoagulants ; Intracerebral haemorrhage, unspecified ; Atherosclerosis of arteries of extremities ; Occlusion and stenosis of carotid artery
	2021-05-14	MG	männlich	91	57	1.57	23.1247	159	105	125	127.2	84	66.0377	Akuter Myokardinfarkt	I21, I25, N18.2, I10	Acute myocardial infarction ; Chronic ischaemic heart disease ; Chronic kidney disease, stage 2 ; Essential (primary) hypertension
	2021-05-14	MG	weiblich	89	55	1.54	23.1911	259	175	160	161.875	109.375	67.5676	Enzephalopathie	I67.9, I63.4, I10.9	Cerebrovascular disease, unspecified, Cerebral infarction due to embolism of cerebral arteries, Essential (primary) hypertension
	2021-05-14	MK	männlich	77	51	1.48	23.2834	192	150	147	130.612	102.041	78.125	amythrophe Lateralsklerose	G12.2, J69.0	Motor neuron disease ; Pneumonitis due to food and vomit
	2021-05-27	MG	männlich	83	70	1.73	23.3887	242	144	167	144.91	86.2275	59.5041	Bypass (Herz)		Prostatakarzinom, Nierenversagen
	2021-05-26	MG	weiblich	81	64	1.65	23.5078	60	46	92	65.2174	50	76.6667	Sepsis		Kardiale Dekompensation NYHA IV, schwere Aortenklappenstenose, Vorhofflimmern
	2021-06-22	MG	männlich	88	61	1.61	23.533	230	146	308	74.6753	47.4026	63.4783	Herzstillstand	I46.0, I10.0, E19.9, F03	Cardiac arrest with successful resuscitation ; benigne essential (primary) hypertension ; E19.9 ; Unspecified dementia
	2021-06-22	MG	männlich	99	57	1.53	24.3496	86	104	200	43	52	120.93	Lungenembolie	I26, C61, M16.9, R29.6	Pulmonary embolism ; Malignant neoplasm of prostate ; Coxarthrosis, unspecified ; Tendency to fall, not elsewhere classified
	2021-05-27	MG	weiblich	98	61	1.58	24.4352	166	203	117	141.88	173.504	122.289	Urosepsis		Harnblasenentleerungsstörung, Hypertonie, Dekubitus
	2021-05-27	MG	weiblich	89	65	1.63	24.4646	206	146	82	251.22	178.049	70.8738	Nichttraumatische subdurale Blutung		Dauertherapie mit Antikoagulanzien, Hypertonie
	2021-05-27	MG	weiblich	85	59	1.55	24.5578	148	135	137	108.029	98.5401	91.2162	Exsikkose		Hirninfarkt, Epilepsie, arterielle Hypertonie, Niereninsuffizienz
HALLE	2021-05-26	MG	männlich	81	75	1.74	24.7721	261	157	210	124.286	74.7619	60.1533	Atemversagen bei Globalinsuffizienz		Lungenödem, Dekompensierte Herzinsuffizienz, Koronare Herzerkrankung, Aortenklappenstenose
	2021-05-27	MG	weiblich	82	64	1.6	25	165	62	130	126.923	47.6923	37.5758	Pankreaskarzinom		Lebermetastasen, Mammakarzinom, KHK & Vorhofflimmern
	2021-05-27	MG	männlich	76	77	1.75	25.1429	181	99	314	57.6433	31.5287	54.6961	Metastasierter Prostatakarzinom
	2021-05-14	MK	männlich	79	68	1.63	25.5937	299	108	149	200.671	72.4832	36.1204	NA	J96.9, J18.9, I63.9	Respiratory failure, unspecified, Pneumonia, unspecified, Cerebral infarction, unspecified
	2021-06-22	MG	männlich	59	75	1.71	25.6489	226	191	131	172.519	145.802	84.5133	chronische respiratorische Insuffizienz	J96.1, C34.8, E11.9	Chronic respiratory failure ; Overlapping lesion of bronchus and lung ; Type 2 diabetes mellitus wihtout complications
	2021-05-14	MG	männlich	60	77	1.72	26.0276	112	124	78	143.59	158.974	110.714	Akuter Myokardinfarkt	I21.0, I50.14, I50.01, I07.1	Acute transmural myocardial infarction of anterior wall, Left ventricular failure (stage 4), Congestive heart disease, Tricuspid insufficiency
	2021-05-14	MG	weiblich	89	59	1.49	26.5754	196	81	127	154.331	63.7795	41.3265	Linksherzversagen	I50.19, I21.0, I25.11	Left ventricular failure ; Acute transmural myocardial infarction of anterior wall ; Atherosclerotic heart disease
	2021-05-14	MK	männlich	93	64	1.55	26.6389	178	157	145	122.759	108.276	88.2022	Lungenembolie	I26.0. I25.12, I48.2, E85.4, I11.0, N19	Pulmonary embolism with mention of acute cor pulmonale ; Atherosclerotic heart disease ; Chronic atrial fibrillation ; Organ-limited amyloidosis ; Hypertensive heart disease with (congestive) heart failure ; Unspecified kidney failure
	2021-05-14	MK	weiblich	94	62	1.51	27.1918	136	29	155	87.7419	18.7097	21.3235	Urothelkarzinom Harnleiter	C66, I48.1, N18.3	Malignant neoplasm of ureter ; Persistent atrial fibrillation ; Chronic kidney disease, stage 3
	2021-05-14	MK	weiblich	93	56	1.43	27.3852	271	95	119	227.731	79.8319	35.0554	Atemstillstand	J96.99, N17,99, N39,0, E86	Respiratory failure, unspecified ; Acute renal failure, unspecified ; Urinary tract infection, site not specified ; Volume depletion
	2021-05-26	MG	weiblich	93	72	1.62	27.4348	161	72	94	171.277	76.5957	44.7205	Herz-Kreislauf-Versagen		Art. Hypertonie
	2021-06-22	MG	weiblich	85	65	1.52	28.1337	306	245	122	250.82	200.82	80.0654	akute coronare Insuffizinez	I24.8, I50.14, I10.90, G20.10, I89.01	Other forms of acute ischaemic heart disease ; Left ventricular failure ; Essential (primary) hypertension, unspecified ; Parkinson disease ; Lymphoedema
	2021-05-26	MG	männlich	77	92	1.8	28.3951	342	407	184	185.87	221.196	119.006	Septischer Schock		Herzinfarkt (im Bereich der Hinterwand), Chronisch lymphatische Leukämie, COPD
	2021-06-22	MG	weiblich	65	71	1.57	28.8044	113	52	141	80.1418	36.8794	46.0177	Pneumonie	J15, C71.1, G40, E11.9, I10.9	Bacterial pneumonia, not elsewhere classified, Malignant neoplasm of brain (Frontal lobe), Epilepsy, Type 2 diabetes mellitus, Essential (primary) hypertension
	2021-05-27	MG	weiblich	85	79	1.65	29.0174	174	187	120	145	155.833	107.471	Pneumonie		metastasiertes Adenokarzinom des Ösophagus, arterielle Hypertonie, Depression
	2021-05-14	MK	weiblich	88	70	1.53	29.903	142	186	186	76.3441	100	130.986	Akuter Myokardinfarkt	I21, I51, I10	Acute myocardial infarction ; Complications and ill-defined descriptions of heart disease ; Essential (primary) hypertension
	2021-05-14	MG	männlich	94	81	1.64	30.116	274	244	196	139.796	124.49	89.0511	akute re/li Herzinsuffizienz	I50.9, I25.19, I10.0,E11.9, F01.2	Heart failure, unspecified ; Atherosclerotic heart disease ; Essential (primary) hypertension ; Type 2 diabetes mellitus ; Subcortical vascular dementia
	2021-05-27	MG	weiblich	83	73	1.55	30.385	150	65	146	102.74	44.5205	43.3333	Hochgradige Herzrhythmusstörung		Akutes Koronarsyndrom, Koronare Herzerkrankung
	2021-05-14	MG	weiblich	72	81	1.59	32.0399	306	316	218	140.367	144.954	103.268	Pneumonie	J15.0, I63.0, I33.0, I48.0, N18.0, I70.0	Pneumonia due to Klebsiella pneumoniae ; Cerebral infarction due to thrombosis of precerebral arteries ; Acute and subacute infective endocarditis ; Paroxysmal atrial fibrillation ; Chronic kidney disease ; Atherosclerosis of aorta
	2021-05-14	MG	weiblich	74	89	1.61	34.3351	182	138	192	94.7917	71.875	75.8242	Akuter Myokardinfarkt	I21.9, i25.9,	Acute myocardial infarction, unspecified ; Chronic ischaemic heart disease, unspecified
AVERAGE				83.9804	60.5098	1.60294	23.494	182.588	121.49	150.52	135.613	88.9449	65.6528
