# Supplementary material for: Multiomics reveal unique signatures of human epiploic adipose tissue related to systemic insulin resistance
Source: HighWire-hosted journal article supplement (doi:10.1136/gutjnl-2021-324603), 2021-10-01
Supplement: gutjnl-2021-324603supp003_data_supplement.pdf [file gutjnl-2021-324603supp003_data_supplement.pdf]

|                                      | No T2D        | n | T2D           | n | p                      |
|--------------------------------------|---------------|---|---------------|---|------------------------|
| Age [years]                          | 44.8 ± 11.5   | 9 | 44.9 ± 10.6   | 9 | 0.98                   |
| Sex [female/male]                    | 7/2           | 9 | 5/4           | 9 | 0.32                   |
| BMI [kg/m <sup>2</sup> ]             | 46.6 ± 5.3    | 9 | 47.3 ± 5.1    | 9 | 0.78                   |
| FPG [mmol/l]                         | 5.0 ± 0.4     | 9 | 7.9 ± 2.6     | 9 | 0.01                   |
| FPI [pmol/l]                         | 51.2 ± 26.2   | 9 | 254.6 ± 189.5 | 9 | 0.01                   |
| HOMA-IR                              | 1.6 ± 0.7     | 9 | 14.4 ± 17.6   | 9 | 0.06                   |
| HbA1c [%]                            | 5.2 ± 0.3     | 9 | 6.7 ± 0.7     | 9 | 2.3 × 10 <sup>-4</sup> |
| <b>Lipid markers</b>                 |               |   |               |   |                        |
| HDL [mmol/l]                         | 1.3 ± 0.5     | 9 | 1.0 ± 0.3     | 9 | 0.16                   |
| LDL [mmol/l]                         | 2.7 ± 0.7     | 9 | 2.3 ± 0.9     | 9 | 0.34                   |
| Triglycerides [mmol/l]               | 1.0 ± 0.4     | 9 | 2.6 ± 3.2     | 9 | 0.15                   |
| Body fat [%]                         | 48.8 ± 9.4    | 9 | 42.5 ± 12.0   | 9 | 0.25                   |
| <b>Blood cells</b>                   |               |   |               |   |                        |
| Leucocytes [Gpt/l]                   | 7.4 ± 2.7     | 9 | 8.8 ± 2.7     | 9 | 0.28                   |
| Erythrocytes [Tpt/l]                 | 4.9 ± 0.4     | 9 | 5.0 ± 0.3     | 9 | 0.51                   |
| Thrombocytes [Gpt/l]                 | 258.2 ± 80.2  | 9 | 257.9 ± 70.0  | 9 | 0.99                   |
| <b>Inflammation</b>                  |               |   |               |   |                        |
| LBP [µg/ml]                          | 10.0 ± 4.0    | 7 | 13.3 ± 4.2    | 9 | 0.14                   |
| TNF-α [pg/ml]                        | 1.4 0.6       | 7 | 2.0 ± 1.1     | 9 | 0.26                   |
| IL-6 [pg/ml]                         | 2.7 ± 1.8     | 7 | 6.0 ± 5.2     | 9 | 0.14                   |
| CRP [mg/l]                           | 8.9 ± 7.1     | 9 | 7.0 ± 5.5     | 9 | 0.53                   |
| <b>Adipokine and Apolipoproteins</b> |               |   |               |   |                        |
| Adipsin [µg/ml]                      | 1.3 ± 0.4     | 8 | 1.1 ± 0.4     | 9 | 0.28                   |
| Adiponectin [ng/ml]                  | 182.0 ± 128.9 | 8 | 90.8 ± 50.0   | 9 | 0.08                   |
| Chemerin [ng/ml]                     | 90.4 ± 24.5   | 8 | 60.3 ± 19.0   | 9 | 0.02                   |
| Leptin [ng/ml]                       | 233.2 ± 218.5 | 8 | 278.9 ± 141.3 | 9 | 0.63                   |
| PAI-1 [ng/ml]                        | 48.0 ± 23.21  | 8 | 50.3 ± 24.2   | 9 | 0.85                   |
| Progranulin [ng/ml]                  | 162.0 ± 31.1  | 8 | 154.0 ± 49.7  | 9 | 0.72                   |
| RBP-4 [µg/ml]                        | 6.3 ± 1.9     | 8 | 6.2 ± 3.1     | 9 | 0.92                   |
| Visfatin [ng/ml]                     | 41.8 ± 12.0   | 8 | 22.3 ± 10.1   | 9 | 0.004                  |
| ApoA1 [µg/ml]                        | 538.9 ± 144.6 | 8 | 471.8 ± 93.1  | 9 | 0.30                   |
| ApoA2 [µg/ml]                        | 15.8 ± 3.7    | 8 | 13.4 ± 2.3    | 9 | 0.15                   |
| ApoA4 [µg/ml]                        | 8.2 ± 2.5     | 9 | 10.5 ± 7.0    | 9 | 0.43                   |
| ApoB100 [µg/ml]                      | 18.8 ± 15.5   | 8 | 13.7 ± 6.3    | 9 | 0.40                   |
| ApoC1 [µg/ml]                        | 14.1 ± 3.6    | 8 | 11.2 ± 6.0    | 9 | 0.26                   |
| ApoC2 [µg/ml]                        | 5.2 ± 1.8     | 8 | 5.0 ± 1.2     | 9 | 0.83                   |
| ApoC3 [µg/ml]                        | 4.8 ± 1.9     | 8 | 6.0 ± 4.1     | 9 | 0.51                   |
| ApoC4 [ng/ml]                        | 213.7 ± 131.5 | 8 | 305.3 ± 226.4 | 9 | 0.35                   |
| ApoD [µg/ml]                         | 2.1 ± 0.7     | 8 | 1.5 ± 0.4     | 9 | 0.10                   |
| ApoE [µg/ml]                         | 7.7 ± 1.9     | 8 | 8.3 ± 5.1     | 9 | 0.77                   |
| <b>Life style</b>                    |               |   |               |   |                        |
| Tobacco [ever/never]                 | 3/3           | 6 | 2/0           | 2 | 0.21                   |
| Alcohol [yes/no]                     | 3/3           | 6 | 1/1           | 2 | 1.00                   |

Cohort characteristics; values as mean ± standard deviation, all comparisons: Student's t-test, except sex, tobacco, alcohol (\*): Chi<sup>2</sup> test

BMI: body mass index, FPG: fasting plasma glucose, FPI: fasting plasma insulin, HOMA-IR: homeostatic model assessment for insulin resistance, HbA1c: glycated hemoglobin A1C, HDL/LDL: high/ low density lipoprotein, LBP: lipopolysaccharide binding protein, TNF- $\alpha$ : tumor necrosis factor alpha, IL-6: interleukin 6, CRP: C-reactive protein, Alcohol: any consumption of alcoholic beverages during the past six months
