# Supplementary material for: Multiomics reveal unique signatures of human epiploic adipose tissue related to systemic insulin resistance
Source: HighWire-hosted journal article supplement (doi:10.1136/gutjnl-2021-324603), 2021-10-01
Supplement: gutjnl-2021-324603supp004_data_supplement.pdf [file gutjnl-2021-324603supp004_data_supplement.pdf]

|                          | No T2D       | n | T2D           | n  | p                      |
|--------------------------|--------------|---|---------------|----|------------------------|
| Age [years]              | 44.8 ± 11.5  | 9 | 45.3 ± 9.3    | 15 | 0.90                   |
| Sex [female/male]        | 7/2          | 9 | 10/5          | 15 | 0.56 <sup>+</sup>      |
| BMI [kg/m <sup>2</sup> ] | 46.6 ± 5.3   | 9 | 48.2 ± 6.8    | 15 | 0.55                   |
| FPG [mmol/l]             | 5.0 ± 0.4    | 9 | 8.2 ± 2.5     | 15 | 1.7 × 10 <sup>-4</sup> |
| FPI [pmol/l]             | 51.2 ± 26.2  | 9 | 243.1 ± 170.4 | 15 | 6.5 × 10 <sup>-4</sup> |
| HOMA-IR                  | 1.6 ± 0.7    | 9 | 13.8 ± 14.5   | 15 | 0.006                  |
| HbA1c [%]                | 5.2 ± 0.3    | 9 | 6.9 ± 1.0     | 15 | 2.2 × 10 <sup>-5</sup> |
| <b>Lipid markers</b>     |              |   |               |    |                        |
| HDL [mmol/l]             | 1.3 ± 0.5    | 9 | 1.0 ± 0.3     | 15 | 0.15                   |
| LDL [mmol/l]             | 2.7 ± 0.7    | 9 | 2.3 ± 0.8     | 15 | 0.33                   |
| Triglycerides [mmol/l]   | 1.0 ± 0.4    | 9 | 2.3 ± 2.5     | 15 | 0.16                   |
| Body fat [%]             | 48.8 ± 9.4   | 9 | 44.1 ± 9.9    | 12 | 0.29                   |
| <b>Blood cells</b>       |              |   |               |    |                        |
| Leucocytes [Gpt/l]       | 7.4 ± 2.7    | 9 | 8.4 ± 2.5     | 15 | 0.38                   |
| Erythrocytes [Tpt/l]     | 4.9 ± 0.4    | 9 | 4.8 ± 0.4     | 15 | 0.68                   |
| Thrombocytes [Gpt/l]     | 258.2 ± 80.2 | 9 | 267.1 ± 67.5  | 15 | 0.77                   |
| <b>Inflammation</b>      |              |   |               |    |                        |
| LBP [µg/ml]              | 10.0 ± 4.0   | 7 | 13.5 ± 4.0    | 15 | 0.07                   |
| TNF-α [pg/ml]            | 1.5 ± 0.6    | 7 | 1.8 ± 0.9     | 15 | 0.44                   |
| IL-6 [pg/ml]             | 2.7 ± 1.8    | 7 | 5.6 ± 4.7     | 15 | 0.13                   |
| CRP [mg/l]               | 8.9 ± 7.1    | 9 | 11.6 ± 9.6    | 15 | 0.48                   |
| <b>Life style</b>        |              |   |               |    |                        |
| Tobacco [ever/never]     | 3/3          | 6 | 5/0           | 5  | 0.06 <sup>+</sup>      |
| Alcohol [yes/no]         | 3/3          | 6 | 2/2           | 4  | 1.00 <sup>+</sup>      |

Cohort characteristics; values as mean ± standard deviation, all comparisons: Student's t-test, except sex, tobacco, alcohol (+): Chi<sup>2</sup> test

BMI: body mass index, FPG: fasting plasma glucose, FPI: fasting plasma insulin, HOMA-IR: homeostatic model assessment for insulin resistance, HbA1c: glycated hemoglobin A1C, HDL/LDL: high/ low density lipoprotein, LBP: lipopolysaccharide binding protein, TNF-α: tumor necrosis factor alpha, IL-6: interleukin 6, CRP: C-reactive protein, Alcohol: any consumption of alcoholic beverages during the past six months
