# Supplementary material for: Multiomics reveal unique signatures of human epiploic adipose tissue related to systemic insulin resistance
Source: HighWire-hosted journal article supplement (doi:10.1136/gutjnl-2021-324603), 2021-10-01
Supplement: gutjnl-2021-324603supp005_data_supplement.pdf [file gutjnl-2021-324603supp005_data_supplement.pdf]

| Gene       | Probe         |
|------------|---------------|
| ADHFE1     | Hs00329084_m1 |
| ADIPOQ     | Hs00605917_m1 |
| B2M        | Hs00187842_m1 |
| CASP1      | Hs00354836_m1 |
| CEBPA      | Hs00269972_s1 |
| GAPDH      | Hs02786624_g1 |
| GRN        | Hs00963707_g1 |
| HOXA10     | Hs00538183_m1 |
| HOXD8      | Hs00251905_m1 |
| IL1B       | Hs01555410_m1 |
| IL6        |               |
| IRX3       | Hs01124217_g1 |
| LEP        | Hs00174877_m1 |
| LEPR       | Hs00174497_m1 |
| MMP9       | Hs00957555_m1 |
| NFKB1      | Hs00765730_m1 |
| NLRP3      | Hs00918082_m1 |
| PGC-1alpha | Hs00173304_m1 |
| PPARG      | Hs01115513_m1 |
| PYCARD     | Hs01547324_gH |
| RARRES2    | Hs00414615_g1 |
| RNASE4     | Hs0026002_s1  |
| SREBP-1c   | Hs01088679_g1 |
| TLR9       | Hs00370913_s1 |
| TNF        | Hs00174128_m1 |
| UCP1       | Hs01084772_m1 |
