# Supplementary material for: Multiomics reveal unique signatures of human epiploic adipose tissue related to systemic insulin resistance
Source: HighWire-hosted journal article supplement (doi:10.1136/gutjnl-2021-324603), 2021-10-01

A Gating strategy

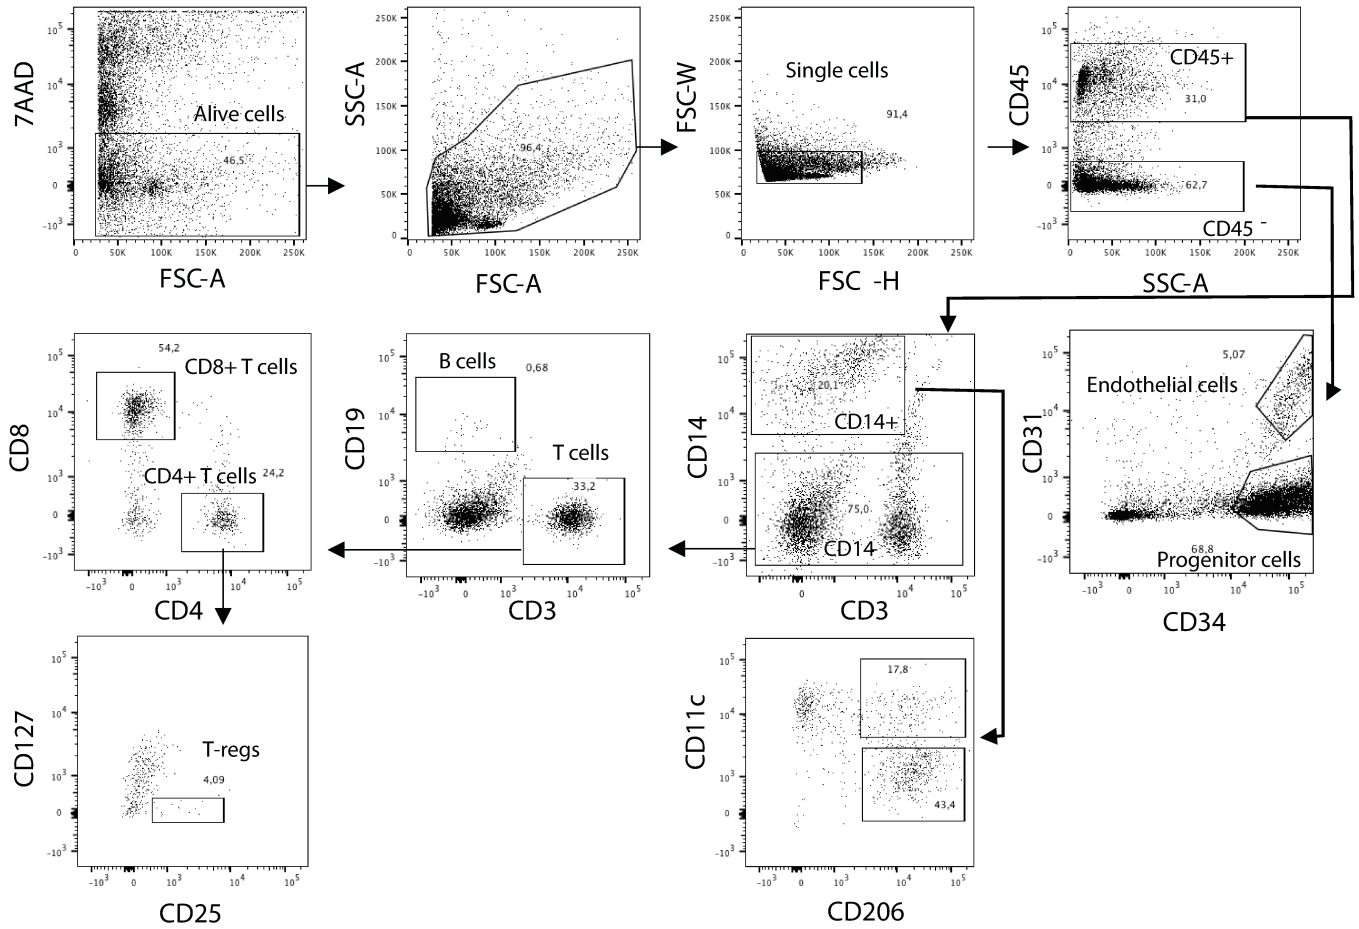

B FACS results for remaining cluster

C Example image MRI-based quantification approach

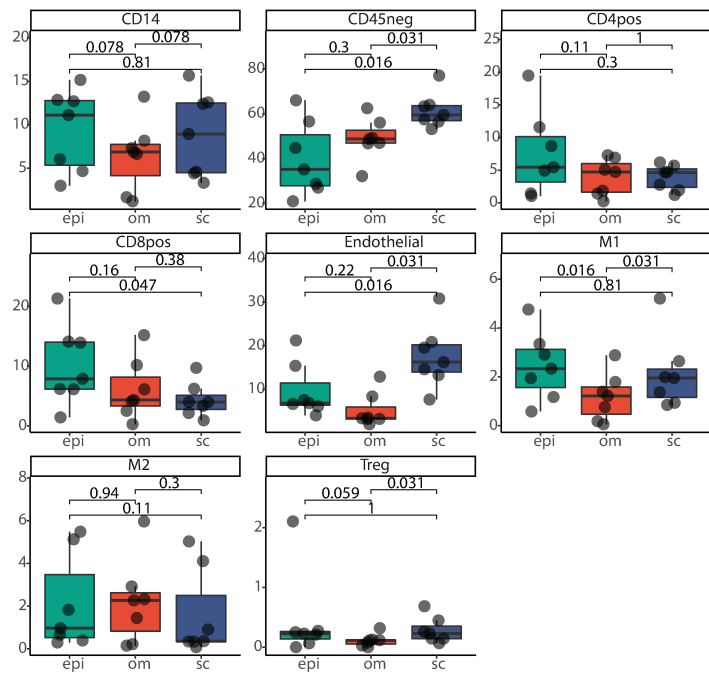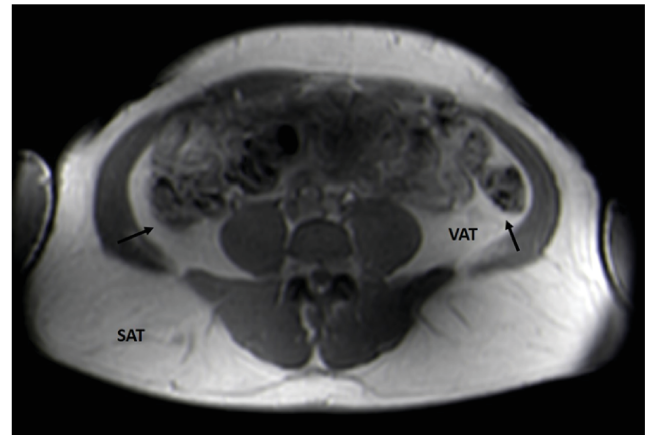

Supplement: gutjnl-2021-324603supp006_data_supplement.pdf [file gutjnl-2021-324603supp006_data_supplement.pdf]
