# Supplementary material for: Multiomics reveal unique signatures of human epiploic adipose tissue related to systemic insulin resistance
Source: HighWire-hosted journal article supplement (doi:10.1136/gutjnl-2021-324603), 2021-10-01
Supplement: gutjnl-2021-324603supp007_data_supplement.xlsx [file gutjnl-2021-324603supp007_data_supplement.xlsx]

## Sheet: Sheet1
		Percentage of total alive single cells
Sample	Depot	CD45+	total CD14+	M1	M2	CD45-	Endothelial	Progenitors	Total T cells	CD4+	T-regs	CD8+	B cells
4266	epi	76.7964	12.8663	4.75794	0.296693	20.982	6.63941	3.78826	48.9145	19.4877	2.1058	21.3402	0.32202
4271	epi	23.5112	2.98739	0.581959	0.969932	66.0524	21.2221	5.19884	2.75461	1.04753	0	1.4549	0.116392
4269	epi	37.8968	12.7034	2.91309	5.12725	56.6131	6.82922	29.3123	12.3139	4.94051	0.0640239	6.16764	0.469509
4272	epi	45.194	6.04357	1.94425	0.6637	44.7724	15.3978	8.17522	12.7977	1.42891	0.249863	6.20754	0.48411
4273	epi	49.6712	4.67963	1.17515	0.391718	27.0775	6.07862	1.59485	16.9278	5.44208	0.272804	7.9113	0.482652
4276	epi	54.8791	15.1554	2.337	5.48359	28.7295	4.02094	9.769	26.2468	8.70035	0.210492	13.9573	0.658463
4278	epi	56.849	11.1195	3.34305	1.8241	35.2409	7.54329	9.42225	29.1857	11.5858	0.226299	14.13	1.31322
4266	Om	39.8294	8.16768	1.78968	2.32418	56.0807	12.9061	17.002	12.816	4.72644	0.318299	6.14378	0.120113
4271	Om	36.6193	1.20294	0.0624902	0.218716	46.8521	3.48383	6.374	0.73426	0.234338	0	0.312451	0.109358
4269	Om	49.2624	13.2314	2.88302	5.96332	47.0609	3.20136	25.575	23.943	6.91387	0.116576	15.2087	0.735327
4272	Om	31.2168	7.30183	1.39027	2.92073	62.5387	3.16023	39.4941	7.67568	1.85759	0.075939	4.15912	0.157719
4273	Om	48.2133	1.66574	0.186116	0.148893	32.198	3.34078	0.930579	4.60637	1.41448	0.0279174	2.54979	0.381537
4276	Om	40.7046	6.85662	0.764966	2.26683	48.7894	1.99312	22.4367	11.0745	5.06702	0.112289	4.35118	1.15798
4278	Om	42.8745	6.64609	1.2179	1.44384	49.3001	8.36548	20.0485	19.5139	7.29086	0.12675	10.2006	1.35016
4266	sc	28.7753	8.93837	1.37212	0.34499	63.3605	19.5546	20.9424	6.27254	2.75992	0.258742	2.18755	0.337149
4271	sc	15.1644	3.33259	0.939387	0.357862	77.1192	30.8432	15.4328	2.95236	1.20778	0.0670991	0.961754	0.111832
4269	sc	38.8133	15.6604	5.20628	5.02962	57.5496	14.6108	23.8699	11.8362	6.1831	0.685857	4.03201	0.488413
4272	sc	35.3664	12.579	2.64212	0.903349	59.5667	16.2331	22.2101	10.7043	1.92895	0.142634	4.00734	0.672417
4273	sc	38.8371	4.59378	0.85313	0.0787505	53.2485	20.8689	8.38693	18.6114	4.7119	0.144376	9.73881	0.170626
4276	sc	37.276	12.4051	1.95111	4.1072	56.5518	13.263	26.7841	11.942	5.6939	0.44792	3.37838	1.57152
4278	sc	28.9677	4.4164	1.99065	0.337213	64.0379	7.658	30.3057	13.086	4.63396	0.228435	6.24388	0.184923
Clinical Data:
ID	Insulin (pmol/l)	Glucose (mmol/l)	HbA1c (mmol/mol)	CRP (mg/l)	age (years)	BMI (kg/m2)	diabetes status
4266	53	6.22	53.01	12.52	44	41	T2D
4271	128.6	5.75	42.08	12.61	43	62	no_T2D
4269	25	4.5	33.336	4.22	36	39	no_T2D
4272	110	4.77	33.336	1.02	33	45	no_T2D
4273	370.2	5.77	51.917	10.04	66	52	T2D
4276	26.4	4.63	37.708	3.62	62	39	no_T2D
4278	308.7	5.03	43.173	1.1	65	47	T2D
