# Supplementary material for: Multiomics reveal unique signatures of human epiploic adipose tissue related to systemic insulin resistance
Source: HighWire-hosted journal article supplement (doi:10.1136/gutjnl-2021-324603), 2021-10-01

**A** Outliers Transcriptome

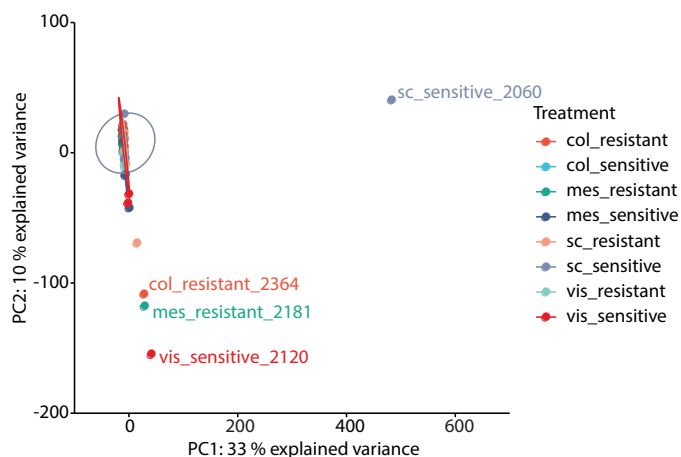

**B** Outliers Proteome

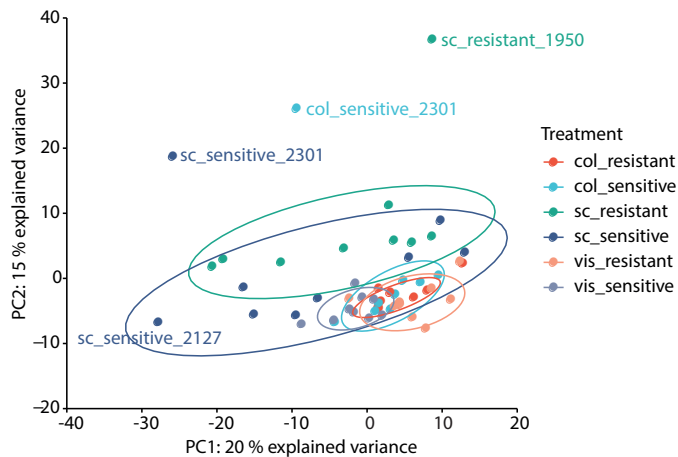

**C** Gene set enrichment using KEGG pathways: Epi Vs Sc

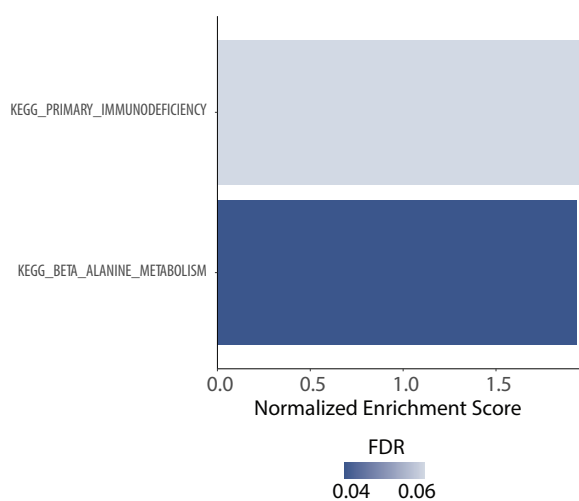

**D** Gene set enrichment using KEGG pathways: Epi Vs Mes

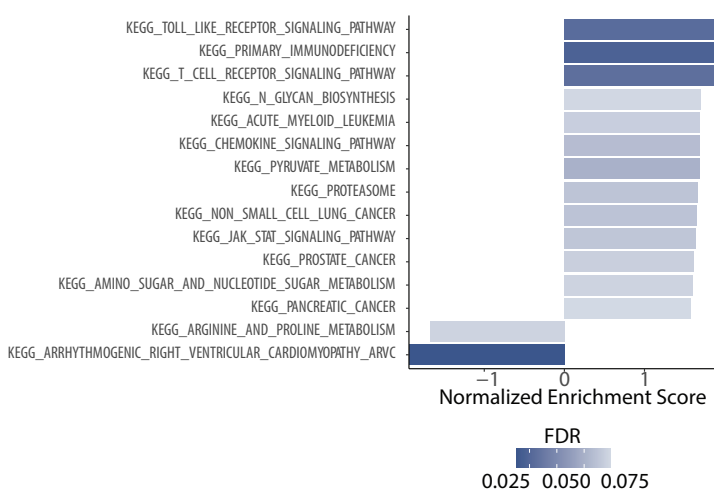

**E** Adipocyte-specific LEP expression

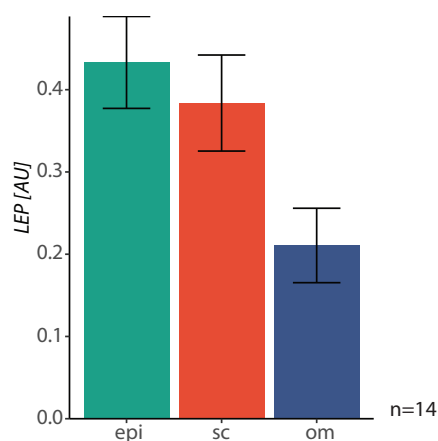

**F** Depot-specific expression of highlighted genes

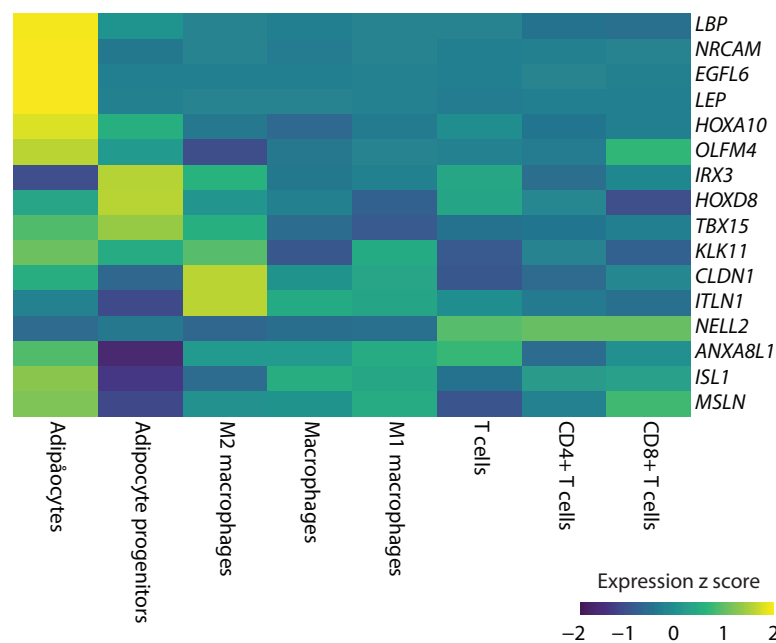

Supplement: gutjnl-2021-324603supp009_data_supplement.pdf [file gutjnl-2021-324603supp009_data_supplement.pdf]
