# Supplementary material for: Multiomics reveal unique signatures of human epiploic adipose tissue related to systemic insulin resistance
Source: HighWire-hosted journal article supplement (doi:10.1136/gutjnl-2021-324603), 2021-10-01

## A Outliers Transcriptome

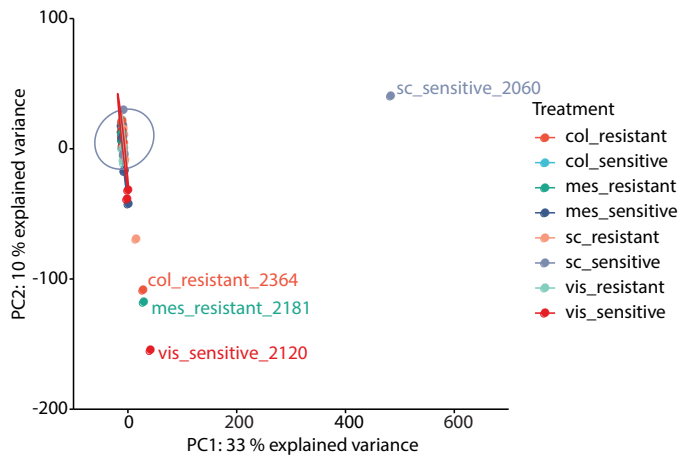

## B Outliers Proteome

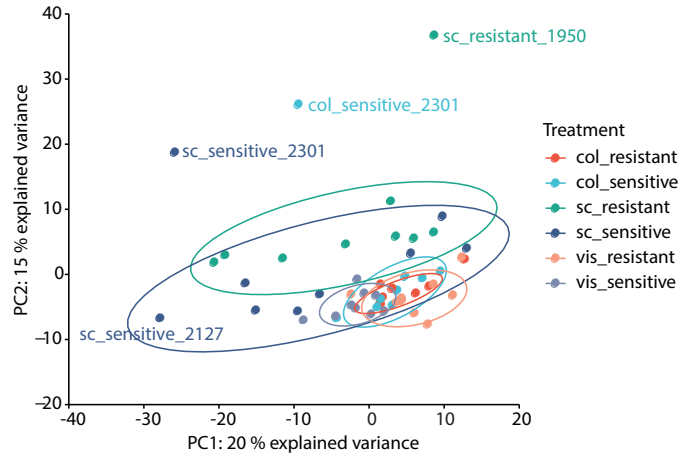

## C Gene set enrichment using KEGG pathways: Epi Vs Sc

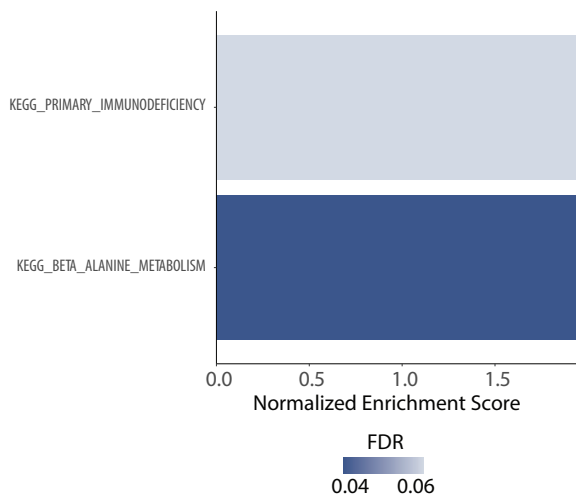

## D Gene set enrichment using KEGG pathways: Epi Vs Mes

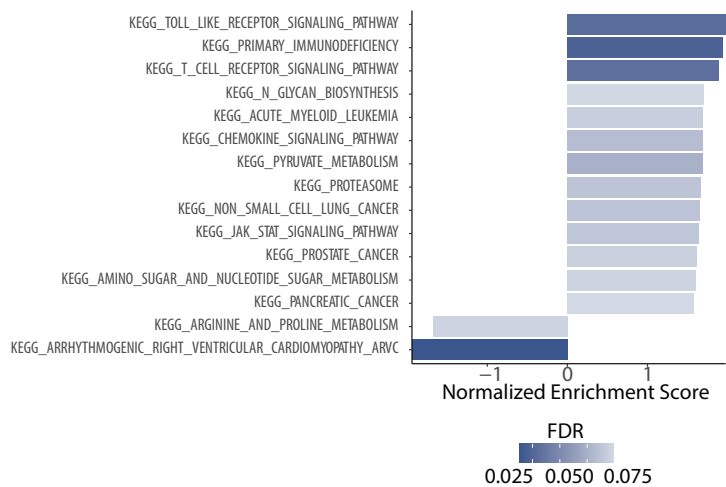

## E Adipocyte-specific LEP expression

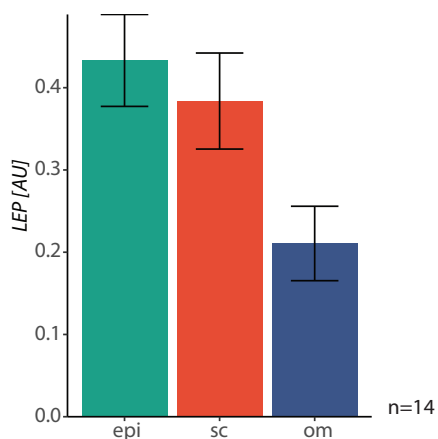

## F Depot-specific expression of highlighted genes

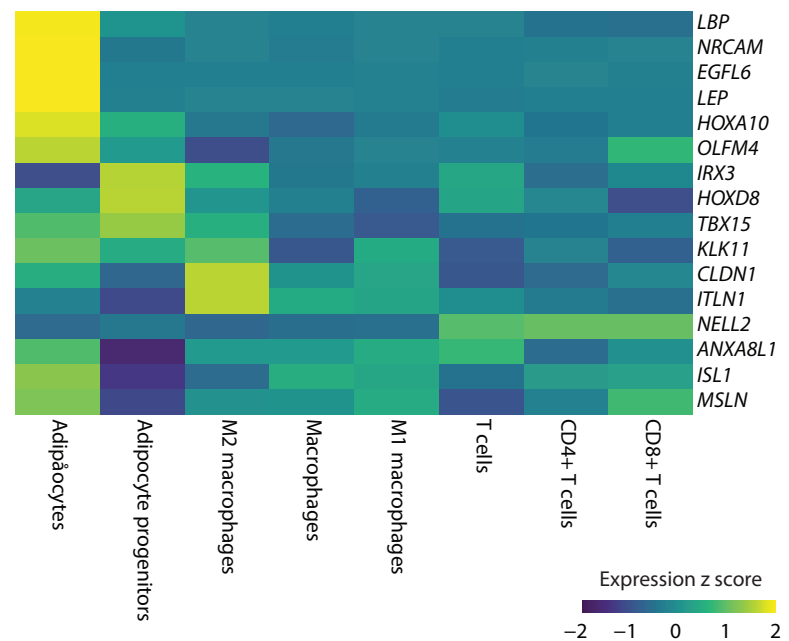

Supplement: gutjnl-2021-324603supp009_data_supplement.pdf [file gutjnl-2021-324603supp009_data_supplement.pdf]
