# Supplementary material for: Multiomics reveal unique signatures of human epiploic adipose tissue related to systemic insulin resistance
Source: HighWire-hosted journal article supplement (doi:10.1136/gutjnl-2021-324603), 2021-10-01
Supplement: gutjnl-2021-324603supp010_data_supplement.xlsx [file gutjnl-2021-324603supp010_data_supplement.xlsx]

## Sheet: Proteome
Accession	X2181col	X2464col	X2065col	X2459col	X1950col	X2045col	X2364col	X2229col	X2059col	X1959col	X2029col	X2060col	X2087col	X2119col	X2120col	X2127col	X2128col	X2181sc	X2464sc	X2065sc	X2459sc	X2045sc	X2364sc	X2229sc	X2059sc	X1959sc	X2029sc	X2060sc	X2087sc	X2119sc	X2120sc	X2128sc	X2181vis	X2464vis	X2065vis	X2459vis	X1950vis	X2045vis	X2364vis	X2229vis	X2059vis	X1959vis	X2029vis	X2060vis	X2087vis	X2119vis	X2120vis	X2127vis	X2128vis
A0A024R0T9;K7ER74;P02655;Q6P163	29.3305	30.0731	28.5495	29.5159	28.5461	27.7851	28.3542	27.9757	27.6559	29.0254	30.8726	28.9933	28.3274	28.5183	28.6959	29.2845	28.739	28.1263	30.4415	NA	28.8829	27.8799	27.3495	28.3676	29.0929	28.3183	29.9471	28.6073	26.7966	27.3666	26.9617	28.8696	28.8321	31.0501	29.8866	29.416	29.5143	28.1263	28.5737	28.7414	29.2367	28.0225	30.5487	28.6277	27.4691	28.7168	27.6179	28.7947	28.0655
A0A024R442;E7ETB3;Q9ULA0;E7EMB6;C9JBE1;F8WAN0	27.5962	27.873	27.2975	27.5536	27.8607	27.5666	27.2435	26.9079	26.9498	27.4383	27.0238	27.5367	27.2797	27.8783	27.7477	28.0537	27.622	27.2332	27.6682	28.0399	27.2862	27.6247	26.9818	27.3373	28.3722	26.9258	27.3798	27.954	26.5446	26.6577	26.9958	25.3716	28.4487	27.6821	27.1669	27.1659	27.5913	27.4403	27.376	27.5877	26.9833	27.9566	28.2742	28.5381	27.8139	27.9895	28.8611	28.6999	28.5721
A0A024R4E5;Q00341;H0Y394	27.7767	28.2689	28.4081	27.8821	28.0743	27.7669	28.5554	27.8758	27.826	28.1797	27.8795	28.3905	28.1182	28.2725	28.5359	27.887	27.6935	28.5294	26.8289	28.59	28.5331	28.3709	29.2214	28.3936	28.125	27.9011	27.6254	NA	28.577	28.4003	27.8609	27.8329	28.1137	27.7938	28.4324	28.0963	28.0615	27.3332	28.7328	28.0271	27.6702	28.2179	28.1354	28.229	27.4722	27.4747	27.3151	27.4954	27.5221
A0A024R4M0;P46781;B5MCT8;C9JM19	27.7002	28.3773	26.8222	28.3666	28.1663	28.8657	28.2081	28.3795	28.4471	27.4073	27.9933	27.7745	27.4341	27.8553	28.5132	27.8962	27.82	27.6457	26.1664	26.9113	27.8936	26.7278	28.6635	27.8768	26.4643	27.4625	28.2006	25.1653	28.1446	28.9286	28.5738	25.9202	27.5582	26.7738	27.9865	29.1369	25.7239	26.7774	25.8702	26.7669	27.1742	28.823	28.0123	27.7054	26.5149	28.0109	28.9695	27.9601	27.7429
A0A024RA52;P25787	27.2271	27.403	27.4763	27.51	27.8053	27.6287	27.9409	27.8656	28.2305	27.4614	27.6663	27.3586	27.4489	27.7166	27.2463	27.5748	27.3777	28.1621	28.7024	28.8726	28.1106	27.7945	28.4307	28.3876	28.4295	27.967	28.0308	28.9873	27.4275	27.707	27.7725	29.2306	25.9589	26.8902	27.66	27.4757	27.7425	27.9963	27.5927	28.197	27.9436	27.9065	26.7197	28.2414	27.9693	26.8525	27.622	27.0767	27.4975
A0A024RBT2;Q9NR28	NA	26.2991	NA	25.9793	NA	NA	25.8074	NA	26.4952	NA	26.1313	NA	26.2785	NA	25.1585	25.8294	26.1902	NA	NA	NA	NA	NA	NA	NA	NA	NA	NA	NA	NA	NA	NA	NA	NA	NA	NA	NA	NA	NA	NA	NA	NA	NA	NA	NA	NA	NA	NA	NA	NA
A0A024RCR6;A0A0G2JK23;P46379;A0A0G2JL47	24.8426	24.8366	24.8706	25.0026	25.0667	25.003	25.1328	24.9096	NA	25.1498	25.3126	25.3621	25.3803	25.3605	25.5231	25.3145	25.0496	24.8958	24.9018	24.8737	25.629	25.5835	25.9394	25.3889	24.9887	25.1082	24.8623	NA	25.4644	25.7554	24.4544	NA	24.9458	24.6392	24.931	25.778	25.2894	25.1354	25.7342	25.5757	25.5868	24.7568	25.3789	24.9576	24.6819	25.0303	24.8819	24.6595	24.9055
A0A075B6I0	26.0535	28.9706	27.1569	26.4926	27.1309	28.1883	26.0179	NA	NA	25.9004	25.6264	28.6358	26.5427	26.5211	25.8215	26.1461	NA	25.8877	29.1312	27.0323	25.476	28.5442	26.1536	NA	26.6972	27.3368	26.9491	29.3946	25.465	25.2657	NA	NA	NA	26.1593	NA	26.7597	NA	28.7452	26.8852	NA	27.368	NA	27.0003	28.1675	26.8818	NA	NA	27.2074	NA
A0A075B6I9;P04211	NA	28.4799	26.6217	27.1888	27.906	NA	26.1364	27.1573	NA	27.1671	25.9521	26.5945	29.0016	NA	NA	NA	NA	26.9889	28.5784	26.8592	26.9773	25.5557	NA	25.4122	NA	26.9045	27.5252	NA	25.3966	NA	NA	NA	NA	NA	NA	NA	NA	NA	NA	NA	NA	NA	NA	NA	NA	NA	NA	NA	NA
A0A075B6K4	28.7522	28.297	28.8508	27.3009	27.385	26.5838	26.8011	NA	NA	26.7987	26.921	27.6818	27.2925	27.8049	25.8545	NA	28.309	27.1169	29.1116	29.5647	NA	27.1211	NA	26.143	NA	28.1442	28.655	28.8278	26.0671	NA	NA	27.891	NA	NA	NA	NA	NA	NA	NA	NA	NA	NA	NA	NA	NA	NA	NA	NA	NA
A0A075B6K5	29.4649	29.3209	28.7235	27.8511	27.7428	27.9476	27.9261	27.8294	NA	27.6581	28.1191	27.9337	27.9997	27.4822	27.097	28.072	29.3287	28.0198	27.7727	27.6566	26.3095	26.5992	26.6682	NA	NA	26.7858	27.5204	28.1366	26.8095	24.854	NA	27.7258	28.421	28.4982	NA	NA	27.0198	NA	NA	27.7039	27.3607	28.6174	27.9149	28.6296	29.1502	27.5444	26.0542	NA	28.7657
A0A075B6S2;A2NJV5	NA	NA	28.6564	NA	NA	NA	NA	NA	NA	28.4177	26.0039	29.1866	29.3319	28.0154	26.8321	NA	29.7047	NA	NA	NA	NA	NA	NA	NA	NA	NA	NA	NA	NA	NA	NA	NA	NA	NA	NA	NA	NA	NA	NA	NA	NA	NA	27.8557	NA	29.244	28.0706	NA	NA	28.0167
A0A075B6S5	25.3811	NA	24.5597	24.871	24.1557	24.3624	23.6081	NA	NA	24.7214	26.3036	24.5147	24.2704	NA	NA	NA	24.64	NA	NA	NA	NA	NA	NA	NA	NA	NA	NA	NA	NA	NA	NA	NA	NA	NA	NA	NA	NA	NA	NA	NA	NA	NA	NA	NA	NA	NA	NA	NA	NA
A0A087WSY5;Q96IY4	25.5921	25.2282	23.6693	25.2897	26.2306	24.6386	24.1261	23.6262	NA	25.5296	25.9849	25.5987	25.8716	25.3587	25.9959	26.3682	26.3397	25.1458	26.3356	26.3733	25.8749	25.6071	24.6384	25.38	27.1258	26.7071	26.8771	26.3118	24.9884	25.1193	25.2743	26.7758	26.0794	26.5685	26.0822	26.2388	25.9721	25.8385	25.1606	26.2494	26.7635	26.2636	27.0217	25.9754	26.391	25.1187	26.4771	26.839	26.358
A0A087WSY6	28.6942	27.9868	27.7678	28.3139	27.4392	28.41	27.3029	27.5138	27.467	27.5233	27.9833	28.3877	27.9041	27.3947	25.4334	27.1643	27.7882	28.1324	29.0296	28.9317	27.2891	27.8121	27.5451	27.5402	27.6588	27.8618	28.2734	29.5034	26.7548	26.5706	NA	28.5277	NA	NA	27.3609	27.4681	NA	26.9838	25.9148	NA	NA	27.4968	28.3998	27.9153	27.974	27.9876	25.3854	NA	27.7227
A0A087WT45;Q4V328;A0A075B793	NA	NA	NA	NA	NA	NA	NA	NA	NA	NA	24.2529	24.1012	NA	23.8758	24.1691	24.0784	23.92	NA	NA	NA	NA	NA	NA	NA	NA	NA	NA	NA	NA	NA	NA	NA	NA	NA	NA	NA	NA	NA	NA	NA	NA	NA	NA	NA	NA	NA	NA	NA	NA
A0A087WT87;P43003;A0A087X0U3	NA	24.4499	NA	24.7773	NA	NA	NA	NA	NA	25.8639	25.2001	25.1102	26.5326	23.6511	25.6376	24.5078	25.5795	NA	NA	NA	NA	NA	NA	NA	NA	NA	NA	NA	NA	NA	NA	NA	NA	NA	NA	NA	NA	NA	NA	NA	NA	NA	NA	NA	NA	NA	NA	NA	NA
A0A087WTA8;P08123	27.0603	27.1674	25.0022	26.1056	27.474	26.2685	24.5652	28.5843	23.9854	24.3364	27.6856	27.2087	28.5706	25.9933	26.368	28.0832	28.4056	27.3709	27.4835	NA	25.809	25.3578	27.3019	27.2016	NA	25.2701	26.4203	27.6296	25.589	26.5239	28.9702	NA	28.3864	29.426	24.8924	26.4857	28.6855	26.6183	25.308	26.7375	26.1645	27.3368	28.5785	27.3954	27.0076	28.8203	29.6876	30.3516	28.1639
A0A087WTT1;P11940;E7EQV3;E7ERJ7;H0YAR2;Q9H361	27.1973	27.5665	27.4023	27.4468	27.6053	27.4408	27.5257	27.7626	27.646	27.0359	26.9309	27.2257	26.9602	27.3867	27.3941	27.4953	27.5636	27.9373	27.2017	27.2578	27.6906	27.3048	28.2587	28.1237	27.3065	27.4342	26.7825	27.1639	28.0065	28.1306	27.9206	27.9262	27.2141	27.1816	27.8368	27.6037	26.8743	27.3923	28.1419	27.7039	27.4188	27.4328	27.2975	27.1242	26.9824	27.4184	27.5562	27.6281	27.1757
A0A087WU53;Q9H0U3	25.6221	26.2849	26.1958	25.8465	25.3899	26.3585	25.5475	25.3392	25.3274	NA	23.6913	NA	NA	NA	NA	NA	NA	NA	NA	NA	NA	NA	NA	NA	NA	NA	NA	NA	NA	NA	NA	NA	NA	NA	NA	NA	NA	NA	NA	NA	NA	NA	NA	NA	NA	NA	NA	NA	NA
A0A087WUC6;E9PI68;Q15005;E9PL01	26.3383	26.3324	26.4928	26.2431	25.992	26.131	26.5719	25.7812	26.5083	26.385	26.1686	26.1937	26.1851	25.9589	26.2567	26.1096	26.2622	26.2486	25.5779	26.1204	26.2648	26.5973	26.709	26.6025	25.8471	26.2117	26.1284	26.719	25.8871	26.0133	25.6933	26.1439	27.0568	26.7165	27.1412	26.8733	26.8578	26.4796	25.9977	27.0273	26.6182	26.0425	26.5069	26.1358	26.1141	25.9478	25.9369	26.1458	25.7431
A0A087WUD3;Q9NRP0	NA	NA	NA	NA	NA	NA	NA	NA	NA	NA	NA	NA	NA	NA	NA	NA	NA	NA	NA	NA	NA	NA	NA	NA	NA	NA	NA	NA	NA	NA	NA	NA	23.9071	23.8994	23.6914	NA	23.793	NA	23.0208	23.5597	23.9367	NA	NA	NA	NA	NA	NA	NA	NA
A0A087WUK2;O14979	24.6735	25.3406	24.6564	25.0134	25.3611	25.2762	24.1983	24.1847	NA	24.7512	24.9349	25.0227	25.1107	24.7247	24.5048	24.438	24.7782	NA	NA	NA	NA	NA	NA	NA	NA	NA	NA	NA	NA	NA	NA	NA	24.7086	24.6188	NA	24.3692	NA	NA	24.4952	NA	NA	25.1562	25.1747	24.1666	24.0039	25.1327	24.2182	24.9233	NA
A0A087WUM0;P57105;A0A087X1F5;A0A087WYV9	24.5558	NA	24.5049	25.0312	25.0025	25.1528	25.1673	24.2397	24.478	24.7523	24.6122	25.1972	24.4284	NA	24.758	25.0392	25.0942	25.7868	24.3519	24.539	25.2216	NA	NA	NA	24.2065	24.7513	NA	NA	NA	24.9377	24.9314	NA	24.5337	24.9345	26.2254	25.1982	NA	NA	NA	NA	NA	25.2717	24.5496	24.5985	24.6971	25.2335	24.809	NA	24.4762
A0A087WUQ6;P07203;A0A2R8Y6B6	29.9481	29.6873	29.8497	30.18	30.1469	30.3775	30.0099	30.1399	30.4032	30.3643	30.2325	29.7015	29.999	30.4192	29.7963	30.1773	29.7812	30.141	29.9954	29.8644	29.7646	29.9116	29.3754	29.6395	30.0008	29.8155	29.7783	29.2567	30.1265	29.0963	28.5444	29.6127	30.1267	30.2458	30.5703	30.7707	30.1449	30.2499	30.1154	29.3705	30.0701	29.686	29.3762	29.1198	29.6898	30.012	29.81	28.5688	28.9048
A0A087WUT6;O60841	23.4228	24.1988	NA	24.0546	24.2552	23.9539	25.0208	24.4284	NA	24.2621	23.731	24.4293	NA	24.6226	24.0317	23.8358	24.003	24.9101	24.0841	24.3024	24.8878	NA	24.4149	24.2325	NA	23.6605	23.6327	NA	24.1937	24.86	24.4401	NA	NA	NA	NA	NA	NA	NA	NA	NA	NA	NA	NA	NA	NA	NA	NA	NA	NA
A0A087WV24;P20711;H7BZF7;A0A087WU57	NA	NA	NA	NA	NA	NA	NA	NA	NA	NA	NA	NA	NA	NA	NA	NA	NA	NA	NA	NA	NA	NA	NA	NA	NA	NA	NA	NA	NA	NA	NA	NA	NA	NA	24.5193	24.3473	25.3155	NA	23.6093	24.8639	24.9064	NA	NA	NA	NA	NA	NA	NA	NA
A0A087WVQ6;Q00610	32.237	32.5379	32.4685	32.5976	32.1185	32.1489	32.488	31.9059	32.0292	30.0578	30.6735	30.4711	30.2798	30.215	30.04	30.2062	30.7742	29.869	30.4963	30.818	30.3206	29.7528	31.0089	30.6553	30.0513	31.0797	31.1969	31.0784	29.9828	31.3137	31.9918	31.3707	31.0411	30.8973	30.6699	31.681	32.0891	31.9262	30.8933	31.5144	31.4265	30.0857	28.9298	30.9819	31.0118	30.837	30.3733	30.6556	31.2975
A0A087WW23;P20292	27.0094	27.3128	26.1216	26.8946	26.5453	26.6389	26.8309	NA	NA	25.2033	26.0475	26.1109	26.4964	26.4871	26.7308	26.1792	26.6812	26.6759	26.2805	26.7787	26.4476	NA	26.6922	NA	25.9881	NA	25.5263	NA	24.2693	25.7886	26.7194	25.6112	27.5642	27.4762	26.8354	NA	27.4716	27.6203	27.2194	27.6421	27.8794	26.6854	26.1214	26.9212	26.5331	26.622	26.463	26.7813	26.5753
A0A087WWM0;O43617;A0A087WYS5	25.3022	25.8757	NA	25.4093	24.8754	24.8714	25.5695	24.9326	25.3914	NA	25.6522	25.7231	25.876	25.5409	25.6212	25.4032	25.6075	NA	NA	NA	NA	NA	NA	NA	NA	NA	NA	NA	NA	NA	NA	NA	26.5808	26.9683	26.5251	26.4771	26.8166	26.7694	26.1555	27.0706	27.0004	26.0576	26.1302	NA	26.1474	26.3679	23.9081	25.6604	NA
A0A087WWT3	35.2889	35.1659	35.2398	35.3376	35.1151	34.9629	34.476	34.4788	33.1985	34.5552	34.6638	34.7594	35.0628	34.3685	33.8113	34.4559	34.8695	33.8377	35.2779	34.6923	34.441	34.4343	34.5192	35.2183	34.8982	35.1386	35.2274	35.7948	34.4014	34.0407	34.2573	35.5517	35.763	35.6837	35.637	35.6702	35.945	35.1147	34.2087	34.3992	35.916	35.109	35.7188	35.1609	35.5252	35.4406	34.7907	35.4495	36.0689
A0A087WXC5;E7ESZ7;O95299	24.6377	24.6442	24.9868	24.897	25.1903	NA	25.4178	24.8658	25.5419	25.9403	24.6655	25.8412	25.8346	25.0196	25.7525	25.6025	24.6403	25.1675	25.0833	25.404	24.4925	NA	25.2389	NA	25.5633	NA	NA	NA	25.9144	24.6769	24.7552	25.2245	25.0015	25.0272	25.1637	25.2421	NA	24.9531	25.6077	25.2872	NA	24.5003	24.262	23.7488	25.6582	24.2108	24.747	25.1817	24.5814
A0A087WXL6;Q9H270;B7Z879	24.0648	24.242	23.9645	24.6075	23.7672	23.9408	24.01	23.5899	NA	23.9952	23.8116	NA	NA	NA	23.863	NA	23.5138	NA	24.3135	23.9894	23.4855	23.5712	23.6373	NA	23.0234	24.2399	24.1672	NA	24.1666	23.6932	23.8741	NA	23.8989	23.7079	23.5727	NA	24.0187	24.1371	23.7933	23.8932	NA	23.5246	NA	23.7002	23.5217	23.3325	NA	NA	NA
A0A087WXM6;J3QQT2;J3KRX5;A0A0A6YYL6;P18621;J3KRB3;A0A087WWH0;J3QS96;J3QLC8;A0A0A0MRF8;A0A087WY81	26.1798	26.0083	25.9259	27.1637	25.7038	25.5896	25.8749	26.5918	26.0035	25.8597	26.5971	26.8435	26.23	25.9774	25.9169	25.7781	26.5593	26.278	25.1942	NA	26.1046	25.1074	NA	25.4717	NA	25.1554	25.618	NA	26.0903	26.4314	26.8698	NA	26.822	26.379	26.7007	25.8754	26.602	25.839	25.5015	26.0388	27.2284	27.0663	26.9975	26.3994	26.3025	27.1375	27.4298	25.5927	26.22
A0A087WY55;Q9NP79;Q5TGM0	NA	24.533	24.4445	24.945	24.7944	25.0713	24.5063	24.9493	25.0652	25.1942	25.143	24.5478	24.9949	24.9112	24.9439	23.982	25.0402	24.7913	25.5277	25.5271	24.7437	25.5997	NA	24.7929	25.1009	25.2025	25.0953	NA	24.733	25.4477	25.1696	NA	24.6872	24.8496	24.9406	25.4438	NA	25.4067	25.1476	25.435	25.5524	25.5005	25.0964	25.6224	25.6284	24.6136	24.8928	25.4666	24.5637
A0A087WY71;E9PFW3;Q96CW1;C9JJ47;C9JTK4	28.1871	28.6632	27.9959	27.8837	27.2748	27.5754	28.1334	27.1978	27.5605	27.2922	26.9909	27.117	27.2967	27.5695	27.5586	27.6421	27.7329	27.9883	28.0624	28.2834	27.8583	27.3164	27.5696	27.6864	27.608	27.407	27.0306	26.5253	27.382	27.2133	27.8316	26.8436	27.3137	27.2282	26.5752	26.8285	27.3044	26.7607	27.6588	27.2534	27.3141	27.0686	26.5944	27.5448	27.3518	26.8315	27.4626	27.772	25.9835
A0A087WYF7;Q6UXV4;A0A087WUX8	24.3516	24.4554	24.484	24.1969	25.0758	24.8856	24.1747	23.7807	24.7284	25.4569	24.8921	25.0901	25.747	24.2815	25.2511	24.6065	24.8356	24.5929	NA	NA	25.7762	NA	24.6846	NA	24.5464	24.6124	24.8334	NA	26.1361	24.7747	24.884	NA	NA	NA	NA	NA	NA	NA	NA	NA	NA	23.9919	24.6117	24.1879	24.8529	24.8877	25.9848	NA	24.9173
A0A087WYF8;Q53GG5;A0A2U3TZH4	NA	NA	NA	NA	NA	NA	NA	NA	NA	NA	NA	NA	NA	NA	NA	NA	NA	NA	NA	NA	NA	NA	NA	NA	NA	NA	NA	NA	NA	NA	NA	NA	NA	23.8992	NA	NA	NA	NA	NA	NA	NA	24.2085	23.4941	25.4953	23.7367	NA	25.02	NA	24.4495
A0A087WYT3;Q15185;B4DDC6	27.2706	27.566	27.4563	26.8466	26.6114	26.8764	26.9001	26.7412	26.9158	26.7739	27.3357	27.6162	27.5773	27.2558	27.2539	27.2176	27.3576	27.0275	27.0368	27.3842	27.2246	27.0607	26.8577	27.8614	27.7283	NA	27.4474	NA	26.8122	27.1481	26.4448	NA	27.3789	27.5715	27.2538	27.2412	27.337	27.3726	27.1311	27.1125	28.5001	25.5767	26.9818	26.6705	26.9195	26.9924	26.6561	NA	27.1994
A0A087WZN1;O43837;A0A087X2E5	25.4798	NA	26.1915	25.413	25.7324	25.7742	25.4857	26.3316	25.8868	26.1129	25.8484	26.2261	26.2039	25.212	25.8457	26.0183	24.692	25.5448	24.9926	25.1769	25.4619	24.9941	24.8312	25.1388	26.1982	25.2306	25.0569	NA	25.9085	25.0701	24.9288	24.7675	25.4075	25.5141	25.5634	24.9369	NA	25.0383	24.6542	25.0031	NA	26.2766	26.1996	25.0844	25.9086	26.1422	26.392	25.925	24.9999
A0A087X054;Q9Y4L1;E9PJ21;A0A087WWI4;K7EQK2	29.4617	29.6364	29.634	28.9907	29.1682	28.367	30.0743	29.5001	29.2917	29.454	29.4084	30.0982	29.7854	29.6405	29.7088	29.1597	28.9739	30.1027	28.9644	28.312	29.3165	29.3757	29.7	29.8301	29.0957	28.4656	28.0469	28.966	29.4709	29.6836	27.9793	28.6553	29.8185	29.5611	30.0857	29.2656	29.1483	28.1195	29.9033	29.4878	28.6853	28.9793	29.5584	28.9828	28.0659	28.2848	28.7084	28.0734	27.0839
A0A087X0D5;P09668	23.9509	NA	23.9304	NA	NA	23.9033	23.5234	23.9421	NA	NA	NA	NA	NA	NA	NA	NA	NA	NA	NA	NA	NA	NA	NA	NA	NA	NA	NA	NA	NA	NA	NA	NA	NA	NA	NA	NA	NA	NA	NA	NA	NA	NA	NA	NA	NA	NA	NA	NA	NA
A0A087X0K0;P39059	29.7535	29.8167	29.4283	29.5548	29.5243	29.9011	29.1839	29.7023	29.7863	29.9108	29.9447	29.688	30.1715	28.9104	29.7338	30.2845	29.8055	30.0293	29.3922	28.536	29.8499	29.3982	29.1236	29.0132	30.0221	30.1097	29.9006	30.0537	30.0418	29.707	29.7429	29.5779	29.3381	29.6741	29.7485	29.8482	29.5985	29.8667	29.8088	29.9883	30.419	29.2126	29.7712	28.3483	29.7816	30.399	29.5404	29.8787	28.2011
A0A087X0M8;O00533	23.2198	23.3532	22.7424	NA	23.8639	23.6009	NA	NA	NA	23.1315	23.8611	NA	22.3822	22.4174	23.3288	23.6551	23.6176	NA	NA	NA	24.0076	22.886	23.5449	23.4481	23.1338	NA	NA	NA	22.432	NA	23.29	NA	NA	23.5262	23.0823	NA	23.4296	23.6787	22.1674	NA	NA	24.4517	23.675	23.3872	23.9911	22.2837	23.8871	23.7365	24.0353
A0A087X0Q4;A0A087WW87;P01614	28.8478	28.918	28.928	27.6472	25.8406	26.5248	27.8339	26.4548	26.8758	26.2297	25.3917	28.5276	27.978	27.4121	25.7486	26.4706	28.0461	27.6336	28.5836	28.475	25.6809	26.9326	26.6044	27.0918	27.8238	26.9095	27.3782	26.2047	26.4042	26.5272	26.3144	27.5903	28.0532	28.2261	NA	NA	NA	26.3662	25.9943	26.931	26.7277	26.8867	26.3983	27.6221	27.6322	28.2624	25.6177	NA	26.8588
A0A087X0R6;Q9UMY4	26.2846	26.7185	25.9857	25.9432	25.9981	26.2492	26.6328	25.9357	26.3164	25.9622	25.8125	26.2572	26.1655	26.1366	26.0546	25.7007	26.0732	26.0455	25.7924	NA	25.7444	26.442	25.8864	NA	NA	25.9142	25.837	26.0618	26.1803	26.2597	26.0142	25.9107	26.4864	26.0588	26.6888	26.1238	26.4042	26.4474	25.9698	NA	27.6796	25.777	25.3395	26.1727	NA	26.2623	25.7633	25.6848	25.8429
A0A087X0S5;P12109	32.2246	32.0182	32.0275	32.1145	32.4086	32.0988	31.811	33.2646	32.4105	31.7499	32.1888	31.9236	32.1409	31.7586	31.803	33.0211	32.9172	32.2765	33.0321	32.0053	32.8445	32.6721	32.1587	32.7071	32.3751	31.7025	32.9378	33.22	32.3862	32.5385	33.6556	32.6508	31.5491	32.2175	31.8671	32.2578	32.3687	31.8538	31.8454	32.445	32.3031	31.146	32.6143	32.383	32.9552	33.1241	32.1929	33.8287	32.2272
A0A087X142;A6NMH6;A6NFQ9;F8W8I8;Q92599	25.2335	25.858	25.3468	24.6703	25.0295	25.2904	25.0942	25.4647	25.1157	24.7306	24.6515	25.1974	24.9203	24.5557	25.5722	25.7162	25.3104	24.9529	25.1267	25.2149	24.7779	25.6295	24.9771	25.1667	25.2435	25.2469	25.1999	NA	24.9677	24.6179	26.3509	25.351	25.0807	26.372	NA	NA	24.9408	25.491	24.9347	24.8369	25.6379	25.0629	25.0972	26.1914	24.8026	24.7275	25.8918	25.7151	26.0972
A0A087X1G7;O60613;A0A0J9YX89;A0A087WXL0;A0A3B3IT39	24.5258	24.6827	24.7178	24.6425	23.6315	23.9468	24.3306	24.2651	24.58	25.0916	25.3336	24.8704	25.2191	24.8554	24.8274	24.9815	24.666	24.4002	NA	NA	24.8113	24.8508	24.7351	25.4297	NA	24.8486	24.4381	24.8069	25.1314	25.0218	24.4759	NA	25.1758	24.8739	25.8559	25.1781	25.6255	25.3152	25.4294	25.819	25.2514	24.7835	25.3584	25.2975	24.5607	24.9574	24.2978	25.1166	24.18
A0A087X1J7;P22352	28.181	27.4198	27.4757	27.6127	29.087	27.9365	26.7965	28.7697	29.1048	28.5471	28.8363	26.5364	28.255	27.5591	28.0641	29.3453	28.4775	28.2533	27.8763	29.1889	28.7206	27.4376	27.8043	27.6421	28.5832	27.1031	27.7391	28.326	26.9994	27.8727	27.486	27.9127	27.9399	27.3379	28.9201	28.2646	28.5301	26.4843	26.4982	28.6287	29.3488	28.0429	28.1004	27.8376	27.4227	27.5101	27.8049	27.8741	28.5432
A0A087X1K9;E5RGR0;O75608;E5RJ48;B4DP64	26.4361	26.6952	26.0424	26.4543	26.5275	26.6732	26.5984	26.3146	26.6681	26.5294	26.2915	26.4112	26.5326	26.7329	26.3148	26.367	26.1952	26.2274	27.1027	27.8906	26.0504	NA	NA	26.9311	27.0769	26.0899	26.0961	26.2157	26.5757	25.9274	25.7904	26.1299	26.1486	27.0806	26.2613	26.6853	NA	NA	NA	27.0813	27.5535	25.7507	26.204	26.6496	25.8966	25.4941	26.0195	NA	26.0663
A0A087X1Z3;Q9UL46;H0YM70	28.1512	27.3394	27.6616	27.5123	27.8208	27.3912	28.1296	27.5457	27.5471	27.7811	27.7051	28.1135	27.4118	27.2703	26.7455	27.0421	27.8355	27.3622	28.6892	28.6526	28.0626	27.275	27.9135	27.8871	28.2878	28.3447	27.4824	27.1455	27.7872	27.9463	27.2409	27.0292	27.8682	27.2439	26.6939	27.6239	27.1914	27.6049	27.4434	26.4093	26.9907	28.2278	27.9023	28.1454	28.3374	27.7766	28.7752	27.2707	28.225
A0A087X232;P09871;F8WCZ6	28.9611	29.0582	28.435	28.503	28.5432	28.755	27.8878	28.0532	28.3194	28.597	28.4183	27.977	28.64	28.392	28.2147	28.5661	29.124	27.6177	29.8163	29.2475	27.4056	28.4931	28.2174	28.031	28.866	28.8306	28.8546	29.035	27.1226	27.3456	27.867	28.9347	28.3838	28.9682	28.3522	27.9549	28.8968	29.0046	28.174	28.5647	28.8907	28.3367	28.6146	28.2095	28.895	28.9124	28.328	29.0217	28.8147
A0A087X256;Q2M389	22.5265	22.6765	22.1889	22.6812	NA	NA	22.5668	23.4774	NA	22.3035	22.4068	22.3452	22.9085	22.8522	23.1109	22.6792	22.4798	22.02	NA	21.8592	22.3656	22.197	NA	22.8225	NA	NA	22.3366	NA	NA	22.2917	22.2428	NA	NA	NA	22.8441	22.3948	22.7566	22.5791	22.5198	22.6611	NA	NA	NA	NA	NA	NA	NA	NA	NA
A0A087X2I1;P62333;H0YJC0	26.7817	27.0367	27.134	26.5641	26.4837	27.4201	26.9407	26.6885	26.9089	26.8821	27.3032	27.2543	27.2482	26.6637	26.4852	26.6275	26.0241	27.0598	27.8624	27.6671	27.0088	27.0902	26.9585	27.3577	27.8704	26.8336	27.1552	27.1814	26.8893	27.4679	26.9105	26.4273	26.7528	26.8336	26.8759	26.6433	26.8028	26.5446	27.0331	26.6938	26.4307	26.8033	26.9073	26.3493	26.6316	25.8374	26.5352	25.9446	25.2188
A0A087X2I2;A0A087WT12;P36969;K7ERP4;K7EJ20;K7EKX7;K7ENB4;A0A0A0MTT1;R4GNE4	30.9036	31.085	31.5631	31.4233	31.1706	31.3615	31.5086	31.4268	31.7794	31.2962	31.3393	30.9933	31.3237	31.4573	31.1092	31.2929	31.711	31.4501	30.7709	30.7589	31.3176	31.2076	30.5999	31.7929	31.149	31.2012	31.5259	30.5801	31.2157	30.8139	29.7728	30.6551	31.6397	30.5667	31.9413	31.7731	31.186	31.656	30.4916	30.9432	30.5124	30.6791	30.7458	30.4181	31.1323	31.7211	30.9792	30.4438	31.0981
A0A096LNH6;Q14185	27.2587	NA	NA	27.4657	27.4975	27.9879	28.1798	28.8766	NA	27.4216	NA	NA	27.2868	27.6273	27.6634	27.4287	27.1376	27.8791	NA	27.5924	NA	27.8491	27.6527	27.7494	26.9285	27.3608	27.3147	NA	26.8701	NA	NA	NA	27.3267	26.9846	27.7107	27.7715	27.7044	27.279	27.2046	27.7997	NA	27.1523	27.2541	27.6252	27.5113	27.6227	27.2361	27.1821	27.2994
A0A096LNV3;A0A096LP02;Q9Y508	24.0178	NA	NA	24.037	23.6636	23.6137	24.0324	NA	NA	23.9729	23.9118	23.9194	24.5713	NA	23.8725	24.1094	NA	NA	NA	NA	NA	NA	NA	NA	NA	NA	NA	NA	NA	NA	NA	NA	23.5475	NA	24.019	NA	NA	NA	23.6892	24.1404	NA	23.7375	23.798	NA	NA	24.0027	23.7281	NA	23.7651
A0A096LNZ9;A0A096LPJ4;P05161	24.8479	24.1701	24.1673	24.1643	23.8723	23.3692	25.8373	26.5885	NA	24.0431	23.3494	26.0834	NA	23.0709	22.4945	23.4087	25.6162	25.0367	24.233	NA	23.7322	NA	NA	NA	NA	23.4966	NA	26.3164	24.2716	26.3515	23.8016	NA	NA	NA	NA	NA	NA	NA	NA	NA	NA	NA	NA	NA	NA	NA	NA	NA	NA
A0A096LPE2;P35542	29.5849	28.026	29.0099	28.5072	28.0559	27.3048	27.5315	26.9108	28.2034	27.5533	28.205	27.8255	28.0342	25.6402	27.6537	28.3803	29.097	28.6465	27.7592	27.1839	27.468	26.6037	26.604	25.9142	28.7018	27.9017	28.0468	NA	26.2795	25.6905	NA	26.2487	29.0437	27.9767	27.457	27.1707	28.3276	27.4129	27.2281	27.6492	NA	27.8824	28.3655	26.7221	27.4698	27.5048	26.1135	27.5757	28.0357
A0A0A0MQS1;Q53H96;B5MD87	23.9172	24.1699	23.3981	24.0617	NA	NA	25.6313	25.4459	24.6229	24.0102	24.3216	NA	NA	23.9787	23.8246	24.3147	24.3225	NA	NA	NA	NA	NA	NA	NA	NA	NA	NA	NA	NA	NA	NA	NA	NA	NA	NA	NA	NA	NA	NA	NA	NA	NA	NA	NA	NA	NA	NA	NA	NA
A0A0A0MR02;P45880;Q5JSD2;Q5JSD1	29.59	29.2013	29.7072	29.5983	29.702	29.7765	29.2911	29.5862	29.8734	29.6753	29.4441	29.2728	29.5777	29.3887	29.8719	29.7541	29.4788	29.1995	28.9193	29.2126	29.1318	29.4438	29.1375	29.4212	29.5061	29.6714	29.4529	29.4326	29.0452	29.2796	29.9499	29.1328	30.0359	29.5415	29.2509	29.453	29.2835	29.7138	29.2652	29.6549	29.4247	29.9107	29.0094	29.0501	29.5498	29.7146	30.2341	29.9378	29.962
A0A0A0MR33;G3V267;G3V5T0;A0A0C4DFM0;G3V4T6;O43708;G3V3B9	NA	NA	NA	23.6266	24.8379	24.2073	23.4558	24.137	NA	23.9728	23.9617	24.5455	NA	NA	24.0271	24.626	NA	NA	NA	NA	NA	NA	NA	NA	NA	NA	NA	NA	NA	NA	NA	NA	NA	NA	NA	NA	NA	NA	NA	NA	NA	NA	NA	NA	NA	NA	NA	NA	NA
A0A0A0MRA8;Q9Y2J2;A8K968;A0A0A0MSA4;A0A1B0GTF8	27.9213	26.6888	27.9639	26.6353	26.8851	27.3168	27.7913	27.2053	26.5435	27.363	27.6069	27.8774	27.0739	26.2289	27.4824	27.8028	27.3229	26.4158	26.8277	27.5442	25.9662	26.1305	27.2166	26.4555	26.7014	26.122	26.8944	NA	25.8525	26.9114	27.2754	25.9489	27.0764	26.8217	28.6859	26.3942	26.2298	25.7769	27.6227	26.3379	26.2351	26.8119	27.2418	26.6852	25.8957	26.8725	26.9977	27.0715	25.8516
A0A0A0MRF9;P16885	NA	NA	26.2948	NA	NA	NA	26.8999	NA	NA	26.1281	NA	25.9417	NA	25.8325	26.7882	26.1651	NA	NA	NA	NA	NA	NA	NA	NA	NA	NA	NA	NA	NA	NA	NA	NA	26.1688	26.2062	NA	NA	26.1378	NA	26.867	26.1354	26.4927	NA	NA	NA	NA	NA	NA	NA	NA
A0A0A0MRI2;Q9UNH7	27.406	27.9763	27.7076	27.4553	27.5968	27.1066	28.101	27.4466	27.219	27.4999	27.4592	27.5892	27.1272	27.5378	27.3888	27.6079	27.2504	27.5128	27.336	27.4762	27.1418	27.1117	27.3037	27.5873	27.1107	26.778	26.4306	26.7353	27.1978	27.1688	27.0769	25.8031	27.7029	27.1624	27.7588	27.3473	27.4825	27.233	27.8779	27.4667	27.0906	26.8324	26.8279	26.9209	26.946	27.4832	27.1627	27.1907	27.2011
A0A0A0MRJ6;H7BY58;P22061;F6S8N6;A0A3F2YNX8	28.0362	28.2209	27.5471	28.094	28.3918	28.1851	28.1574	28.5042	28.9562	28.553	28.4897	27.9627	27.3016	28.5362	28.2344	28.329	28.7946	28.4738	29.5254	29.7499	28.6169	28.9533	28.1332	28.329	29.1455	28.6302	28.8684	28.2983	28.1663	28.2311	28.1583	28.2621	27.6778	26.2705	25.7032	27.1296	27.5955	28.0545	27.2408	27.8944	28.454	27.8775	28.4235	28.2287	28.447	28.0302	27.7142	27.6461	28.0205
A0A0A0MRM8;A0A0D9SGC1;E7EW20;Q9UM54	23.6634	NA	24.5878	NA	23.7525	23.5558	NA	23.4685	NA	23.8256	24.1107	23.8509	24.0163	NA	23.3111	23.7988	23.541	23.5144	NA	23.859	23.293	23.4644	23.6545	NA	23.5748	23.6013	NA	NA	23.6729	NA	NA	NA	23.5964	23.584	24.5138	23.6472	23.8471	NA	23.7742	NA	23.8157	23.5707	NA	23.7929	NA	23.8817	22.9514	NA	NA
A0A0A0MRZ8;P04433	30.6545	30.1114	29.7778	30.5212	29.3514	29.953	28.662	29.2689	29.6588	28.9583	30.4284	29.6183	29.8941	29.4919	28.1529	29.881	29.6536	30.6404	31.2117	30.8939	29.6176	28.4685	29.5306	29.2611	30.0399	30.2652	30.3583	30.8277	28.0876	28.7271	NA	30.4684	27.131	30.0357	29.2825	29.7438	NA	28.9044	NA	NA	NA	29.4001	26.9478	28.6824	29.1847	26.6208	28.1233	27.6172	27.5702
A0A0A0MS09;P01880	NA	NA	26.3457	NA	24.2453	NA	NA	27.8764	NA	24.8065	NA	28.9509	26.2306	24.4029	NA	23.9047	NA	NA	NA	NA	NA	NA	NA	NA	NA	NA	NA	NA	NA	NA	NA	NA	NA	NA	24.1586	NA	24.2756	NA	NA	28.1742	NA	24.1014	NA	27.6571	26.5703	24.1042	NA	24.8685	25.1482
A0A0A0MS15	26.2576	25.5423	25.4712	25.3777	24.9567	25.4513	24.5506	NA	25.8931	25.3161	25.838	24.8117	24.7794	25.0123	NA	24.9789	26.9663	24.9763	25.0641	27.4177	25.2037	NA	25.0789	26.0769	27.0174	26.1313	26.7772	27.3776	23.5803	NA	NA	27.4288	25.8578	NA	NA	NA	NA	25.1833	NA	NA	NA	26.1685	27.0631	25.797	NA	NA	NA	25.7213	26.8092
A0A0A0MS41;Q9BWM7;A0A1P0AYU5;S4R3N9	25.7737	27.0572	25.896	26.0529	25.9786	26.5582	25.4897	26.7496	26.8313	26.7302	26.6027	26.0599	25.9925	26.3933	26.6955	26.6884	25.6963	27.166	27.9029	27.8015	27.9521	26.4703	27.9266	27.8289	27.7244	27.4917	27.3392	25.5517	26.9408	27.4608	28.3109	26.1624	25.4612	27.0063	25.4032	24.9199	24.9554	25.5242	26.0225	26.8335	25.9733	27.6068	26.6834	27.3435	25.8332	26.6431	27.0343	26.8478	26.4611
A0A0A0MS54;P22694;A0A087WVC4;B1APG2;B1APF8;B1APF9;B1APG3;B1APG1;B1APG0;B1APF7	24.4812	NA	24.3261	24.7299	24.6482	25.1104	24.7039	25.472	25.0898	25.4246	24.9693	24.6858	NA	24.0359	24.9516	24.5372	24.707	NA	NA	NA	NA	NA	NA	NA	NA	NA	NA	NA	NA	NA	NA	NA	NA	NA	NA	NA	NA	NA	NA	NA	NA	NA	NA	NA	NA	NA	NA	NA	NA
A0A0A0MS99;I3L4X2;P33527	23.9381	23.5815	24.1023	23.8912	NA	24.4607	24.1543	NA	NA	NA	NA	23.2232	NA	NA	NA	NA	NA	NA	NA	NA	NA	NA	NA	NA	NA	NA	NA	NA	NA	NA	NA	NA	NA	NA	NA	NA	NA	NA	NA	NA	NA	NA	NA	NA	NA	NA	NA	NA	NA
A0A0A0MSD0;Q4LDE5	24.5117	24.7931	24.6317	24.4613	25.1054	24.9245	24.3111	23.8732	23.2972	24.091	24.105	25.1029	22.5089	24.1338	26.2594	23.2285	23.2156	NA	NA	NA	NA	NA	NA	NA	NA	NA	NA	NA	NA	NA	NA	NA	23.8437	25.0361	25.2851	24.4035	24.4739	23.8323	24.4076	23.7115	NA	24.6333	24.6872	23.0913	23.6832	24.8283	25.6864	24.5058	23.2713
A0A0A0MSS8;P42330;S4R3Z2	31.434	31.4426	31.9011	32.396	32.0631	32.3899	32.2087	31.6221	32.2605	32.3138	31.8675	32.0072	31.3151	32.6806	31.3778	31.4878	31.4483	32.6211	32.3455	32.0325	32.9472	32.5619	32.2122	32.8662	32.3473	32.2139	31.959	31.1724	32.7016	32.5289	30.9121	31.5784	31.303	31.1107	32.1148	32.1199	31.686	32.3041	32.1843	31.5443	29.6986	31.2948	31.0192	30.2644	30.8103	32.0363	30.4611	30.0503	29.8154
A0A0A0MSU4;O94911;A0A075B774	26.3749	25.1608	25.5791	24.9904	25.3011	25.6593	26.2245	24.5794	26.5163	NA	24.8083	25.5614	24.722	NA	23.8119	24.2164	24.1703	NA	NA	NA	NA	NA	NA	NA	NA	NA	NA	NA	NA	NA	NA	NA	25.4944	26.0009	24.1349	23.5993	24.5844	24.424	24.491	24.3011	25.2859	25.9175	25.1537	27.0519	25.4456	24.6304	25.2701	24.5235	24.5446
A0A0A0MSV6;D6R934;P02746	28.6308	28.0826	27.8558	29.0173	28.9004	27.8411	27.9973	28.112	27.2112	28.221	27.9161	28.3161	28.3518	28.2816	27.4592	28.4468	29.1176	25.8685	29.996	29.2011	27.266	28.2892	28.4515	27.9353	28.2881	28.436	28.2361	29.4832	27.2189	26.9575	27.0243	29.8613	27.4892	28.3756	27.9966	29.1499	28.8003	27.7671	28.5639	28.4552	26.4359	NA	28.4815	27.514	28.1175	28.5837	26.7628	28.0637	28.5458
A0A0A0MSW4;P48739;B3KYB6	25.5519	24.8112	25.1703	25.541	26.0039	25.7674	25.8863	25.6091	25.2434	26.2393	25.8472	26.2074	26.1668	26.6375	25.9936	26.1919	25.9225	25.9451	26.1533	26.5735	26.219	26.1661	25.8021	26.6244	26.3575	26.15	25.6997	NA	25.8588	25.941	25.8065	26.9354	25.2167	25.583	25.6823	24.9226	NA	26.0982	25.091	25.3879	NA	26.161	25.947	26.3665	26.0509	25.6437	25.4525	26.1982	25.7676
A0A0A0MT32;P38571;Q5T073	NA	NA	NA	NA	NA	NA	NA	NA	NA	NA	NA	NA	NA	NA	NA	NA	NA	24.3911	NA	25.0442	24.7656	NA	26.1933	23.6333	NA	NA	NA	NA	NA	26.0932	NA	NA	NA	NA	NA	NA	NA	NA	NA	NA	NA	NA	NA	NA	NA	NA	NA	NA	NA
A0A0A0MT60;Q5T1M5	26.2146	26.9938	26.3758	26.6038	26.1911	26.6943	26.6397	25.9061	26.1886	25.6118	25.7176	26.7187	25.8175	26.71	26.2096	25.5963	26.3418	26.2435	26.6428	26.4031	25.6562	25.3117	26.7658	26.6709	25.9229	25.7844	25.5933	NA	26.7574	26.9928	25.9361	NA	25.9888	26.0051	25.8606	26.1834	26.4155	26.5034	26.3812	25.9736	26.443	25.8437	26.4599	26.4025	26.0786	26.3804	25.9657	26.3928	26.1617
A0A0A0MT83;P26440;H0YLC3;H7C4G6	26.6504	26.9652	27.4432	26.8739	26.9809	26.4586	26.597	26.1905	27.1129	26.5985	26.8896	26.4956	26.4535	26.7498	27.4791	26.7682	26.8375	26.7088	26.3595	26.6106	25.8507	26.2266	25.8374	26.231	26.6538	26.668	26.7611	NA	26.5546	25.9082	27.3127	25.59	27.1125	26.4324	26.9233	26.3113	26.1499	26.7205	26.7957	26.6913	26.8133	27.2458	27.0134	26.2571	26.9568	26.8405	27.9597	27.1725	27.0456
A0A0A0MTB9;H0YAK8;P09455;A0A0A0MQT0	NA	NA	NA	NA	NA	NA	NA	NA	NA	NA	NA	NA	NA	NA	NA	NA	NA	NA	NA	NA	NA	NA	NA	NA	NA	NA	NA	NA	NA	NA	NA	NA	NA	NA	NA	NA	NA	NA	NA	NA	NA	24.7904	25.0877	NA	NA	24.4602	24.3607	25.5668	26.0322
A0A0A0MTC7;A0A0A0MQS9;Q16363	32.2353	31.5706	32.5348	32.3035	32.5689	32.0087	32.0582	32.2388	32.6395	32.0341	32.2862	32.122	32.3845	32.3448	31.6786	32.0154	32.1803	30.9041	30.392	30.1353	30.7685	30.6569	30.0844	30.5316	31.0198	31.8989	32.0397	32.0379	31.6664	31.247	31.4515	32.1282	31.9922	30.9814	32.2944	32.1367	32.5946	31.967	31.6867	32.0385	32.4844	32.0269	31.7503	31.2897	32.265	32.3344	31.3261	31.6555	31.645
A0A0A0MTH3;Q13418	29.5588	29.5125	30.2226	29.6885	29.9765	29.4306	29.5473	29.6502	29.8364	29.7585	29.9601	30.2654	29.5765	29.8469	29.6322	29.7132	30.0841	29.7671	29.2169	29.5197	29.9281	29.7528	29.3545	29.8756	30.0649	29.3437	29.6059	28.605	29.5535	29.3341	28.8942	29.3707	29.4357	29.2129	29.5965	29.5605	29.8489	29.7146	29.5088	29.8508	29.8094	29.4737	29.4027	29.28	29.567	29.9318	29.0455	29.2997	28.6948
A0A0A0MTN0;Q13617;Q5T2B5	24.5127	24.2296	24.5553	24.312	24.8053	NA	24.5812	24.1866	24.7464	24.1346	24.7549	24.4522	24.1535	24.0346	23.7952	24.0839	24.4705	23.7696	25.7432	24.8935	23.6787	24.6315	24.1128	23.8052	24.1937	24.7498	24.9402	24.7773	23.3265	23.9148	23.6308	NA	23.3124	24.1522	24.0329	23.2091	24.0108	NA	23.8716	24.0295	23.8442	24.202	NA	24.2136	24.7045	23.4275	23.786	24.034	23.5262
A0A0A0MTS7;Q8WZ42;A0A0A0MRA3	NA	NA	NA	NA	NA	NA	NA	NA	NA	NA	NA	NA	NA	NA	NA	NA	NA	NA	NA	30.106	28.9184	NA	NA	NA	NA	NA	29.6334	31.1992	NA	29.6985	29.0642	29.9975	NA	NA	NA	NA	NA	NA	NA	NA	NA	NA	NA	NA	NA	NA	NA	NA	NA
A0A0A6YYA0;Q9Y3B3	27.7878	27.6319	27.1333	28.3409	27.8668	28.0927	27.6781	28.2746	28.5044	26.1457	27.0844	26.6053	27.1729	27.5551	27.7037	27.5378	26.9973	27.2594	27.8849	28.368	28.4402	27.5949	26.0915	26.7114	27.1003	26.2718	26.3427	NA	27.5296	26.4476	27.4665	26.4769	27.6017	27.9453	27.3619	27.4943	26.7513	27.7859	27.4582	26.9517	27.9203	27.0558	26.7215	27.7983	26.7802	27.5217	27.5619	27.0135	27.9453
A0A0A6YYJ8;Q9Y383	26.0751	NA	26.1386	26.1515	NA	NA	26.2185	NA	NA	26.4756	25.9898	26.5345	26.2863	26.8821	25.4987	26.5026	28.2814	25.6423	28.8736	27.4307	26.3303	28.437	27.7948	NA	NA	28.0532	27.9242	NA	26.2197	NA	26.0028	NA	NA	NA	25.757	NA	NA	NA	NA	NA	NA	25.8536	26.7819	NA	26.7877	NA	26.1151	26.9029	26.7201
A0A0A6YYL4;P57737	25.5183	25.7492	25.5383	25.4808	24.8397	25.5635	26.459	25.3816	24.984	25.4619	25.032	25.5782	25.3582	25.6816	25.6673	24.3236	24.929	26.2951	26.0158	26.023	26.0888	25.2144	26.6776	25.9175	24.6888	24.9166	25.1989	NA	25.9842	26.4186	24.1274	25.6542	24.5095	25.6028	25.6852	26.1068	25.279	25.5564	26.3862	24.5868	25.2699	24.4754	24.3756	25.2663	24.8463	24.336	NA	24.8385	24.2962
A0A0B4J1R2;Q9H6R3	25.2062	25.1312	26.7794	26.2325	26.8702	26.1238	25.7056	26.6014	NA	26.439	26.3517	24.9456	25.8963	26.2853	27.4683	25.6271	26.3083	25.8688	NA	24.85	25.9747	25.8213	24.7526	25.5055	25.3278	26.7333	26.2267	NA	27.8788	25.2989	27.705	25.3268	25.2662	24.2092	26.2671	25.7484	26.4018	25.8033	24.5471	25.9611	26.7356	26.2546	24.8773	24.2119	26.1338	24.9246	25.6639	26.1895	26.234
A0A0B4J1U7	28.2351	28.4535	28.5752	27.1552	27.2408	28.5853	27.8655	27.0106	27.6174	26.5768	26.9991	27.993	28.8125	NA	25.2571	27.633	NA	27.0632	27.4743	29.8516	NA	27.5602	28.263	27.9942	NA	27.9882	27.7523	29.322	NA	NA	NA	NA	NA	26.6649	26.554	26.1781	NA	NA	27.3581	NA	27.3497	27.5384	27.6197	28.368	28.7944	27.4432	25.7549	28.369	28.0587
A0A0B4J1V0	25.1603	26.5633	25.2031	24.6738	24.7574	NA	24.5395	NA	24.9804	NA	NA	NA	NA	NA	NA	24.1585	NA	NA	NA	NA	NA	NA	NA	NA	NA	NA	NA	NA	NA	NA	NA	NA	NA	NA	NA	NA	NA	NA	NA	NA	NA	NA	NA	NA	NA	NA	NA	NA	NA
A0A0B4J1V2	25.7128	NA	23.0224	23.1678	23.8888	NA	22.7917	NA	NA	22.1945	NA	NA	22.7586	22.5011	NA	23.1461	23.5114	25.286	25.0369	24.315	22.982	24.3145	22.5367	23.1996	NA	NA	NA	NA	NA	NA	NA	24.8122	NA	NA	NA	NA	NA	NA	NA	NA	NA	NA	NA	NA	NA	NA	NA	NA	NA
A0A0B4J1X5;A0A075B7E8	28.1627	30.0902	28.2236	28.2291	27.1993	27.7889	NA	NA	NA	NA	27.5647	26.9048	27.3865	NA	NA	NA	27.9208	27.1196	29.823	28.6698	26.8436	NA	NA	NA	27.2173	27.6588	28.2632	28.1077	NA	NA	NA	27.6905	NA	NA	NA	26.655	NA	NA	NA	NA	NA	27.5658	27.2268	27.1374	NA	NA	NA	NA	28.2781
A0A0B4J1Y9	29.0812	30.9508	30.2475	28.8759	28.5971	29.768	27.6846	24.9645	28.8674	28.1942	27.0195	29.3798	28.1296	28.2114	26.1239	29.3459	29.6314	27.7597	31.1079	30.7245	26.8361	29.4574	27.1937	28.3767	28.6552	29.4113	29.2469	31.8559	26.3561	26.0581	NA	30.2381	27.2209	29.6015	27.1293	26.5904	27.7347	29.0318	27.6849	27.3722	28.678	28.5716	27.914	30.2585	29.6915	28.4594	25.9591	29.1452	30.0148
A0A0B4J1Z1;C9JAB2;Q16629	24.9306	NA	NA	24.8736	25.265	25.1882	25.5513	25.1898	24.9221	24.4881	24.4395	24.73	NA	23.9405	25.0331	24.5216	NA	NA	NA	NA	NA	NA	NA	NA	NA	NA	NA	NA	NA	NA	NA	NA	25.0691	25.4598	25.1276	24.3842	24.9847	24.2313	NA	25.2332	25.1577	24.7483	25.8762	NA	NA	24.9029	26.3342	24.6261	24.7969
A0A0B4J231;B9A064;P0CG04	33.2273	33.7648	33.4939	32.9794	32.0612	32.0832	32.2104	32.0637	31.8494	32.4211	32.626	33.3357	33.5127	32.3241	31.506	32.8001	33.7661	32.2213	34.2326	34.2062	31.9822	32.6488	32.6881	32.6062	32.6628	32.6294	33.4338	34.3539	32.2907	31.3714	29.9801	34.0565	31.8767	32.929	32.4274	31.9567	30.8706	31.5722	31.5961	31.5758	32.2999	32.1495	33.1844	33.2746	33.6027	32.2841	31.2812	31.455	32.9256
A0A0B4J2A0;Q9UHJ6	24.0443	25.1957	24.4574	24.1646	24.4113	NA	24.4326	NA	24.8149	NA	24.2718	24.208	24.5424	24.8478	24.2302	24.7306	24.7176	24.3117	25.8221	24.8447	25.2799	25.9026	24.9299	24.4204	25.553	24.8994	24.8861	NA	25.0741	25.0271	24.7944	NA	NA	NA	NA	NA	NA	NA	NA	NA	NA	NA	NA	NA	NA	NA	NA	NA	NA
A0A0B4J2B5;S4R460	30.4494	31.4897	30.1206	30.0969	29.9513	30.355	29.2145	29.5297	29.8276	29.5512	30.1486	30.3736	30.9599	29.11	27.5065	29.5798	30.5042	28.55	31.4226	30.7679	28.4	29.4109	29.0242	29.1765	29.7593	30.087	30.853	32.305	29.4329	28.1986	27.2869	31.5148	28.9966	30.8018	29.8587	29.6813	29.5794	29.9106	28.7999	29.6803	28.2812	29.6664	30.8822	31.0606	31.1598	29.4367	28.4598	30.324	30.576
A0A0C4DFN3;Q99685;A0A3B3ITT3;E7EWX8;H7C4E0;H7C599	29.2051	29.2594	28.7546	29.833	29.8465	29.5516	29.6412	30.302	29.8238	30.036	29.7309	29.3968	29.5844	30.1614	29.6258	29.7192	29.451	30.3146	30.2655	28.8008	30.1361	30.0253	29.7595	30.4404	29.7041	29.4639	29.5355	29.3937	30.7516	29.8537	28.4085	29.2705	28.2799	29.7458	29.4361	29.9467	29.1624	29.5302	29.8059	29.1814	29.395	29.2424	29.2748	28.8775	29.4526	29.5911	29.4142	28.647	27.7709
A0A0C4DFT3;Q12959;E7EQD7	24.1555	24.3432	24.6772	24.1327	24.21	NA	24.3711	24.6916	24.5431	24.2597	NA	24.2967	NA	24.3839	24.1773	24.2044	24.8212	NA	NA	NA	NA	NA	NA	NA	NA	NA	NA	NA	NA	NA	NA	NA	NA	NA	24.4474	23.877	NA	NA	24.5984	24.9312	24.869	24.1558	24.4081	NA	NA	24.3464	NA	NA	NA
A0A0C4DFV9;Q01105;A0A087X027;P0DME0	26.9186	26.4525	26.6521	25.9688	26.1995	26.2458	26.1112	25.6138	26.8888	26.2549	25.9663	26.5702	26.6672	26.4664	26.3633	26.7459	26.5652	26.9924	26.0881	26.5888	25.8628	26.5429	26.2834	25.68	26.5512	26.938	26.6775	28.4062	26.1421	27.1029	27.6917	26.8631	26.8291	27.4222	27.5449	26.0351	26.3553	26.9427	25.8632	26.0739	25.2083	27.2098	26.6335	27.3572	27.3554	27.4777	27.9578	28.0882	27.0495
A0A0C4DG09;Q8N126	NA	NA	NA	NA	NA	NA	NA	NA	NA	NA	NA	NA	NA	NA	NA	NA	NA	NA	NA	NA	NA	NA	NA	NA	NA	NA	NA	NA	NA	NA	NA	NA	NA	NA	NA	NA	NA	NA	NA	NA	NA	23.0281	23.4535	23.6459	NA	NA	22.4949	23.1084	23.8889
A0A0C4DG85;P40394;E9PFG0	26.9649	NA	26.0324	25.7545	26.2071	25.1792	24.3906	25.4334	25.8467	26.2488	26.5315	NA	25.9037	25.0578	27.5269	26.0649	25.6496	25.7054	NA	NA	NA	26.1876	25.6038	26.2689	27.7379	26.1889	26.5095	NA	25.2089	25.301	26.0948	NA	26.9453	NA	26.6655	NA	26.9133	26.0953	25.1195	26.1596	NA	25.6196	26.2738	NA	26.128	26.1684	27.6963	26.6156	26.4475
A0A0C4DGA2;O75521	NA	23.2707	24.0969	22.9541	23.1885	24.0199	NA	23.3292	24.5057	24.0941	23.8364	24.0862	24.4119	23.9167	23.9466	24.0401	23.5309	23.4128	23.9027	NA	NA	NA	23.6173	23.6934	24.0878	24.0574	23.6704	NA	24.6686	23.4334	NA	24.5088	NA	NA	NA	NA	NA	NA	NA	NA	NA	23.7703	NA	23.715	23.7647	22.665	NA	23.7131	NA
A0A0C4DGA7;O94929;D6RHE7;A0A0A0MRD5	NA	NA	NA	22.0298	NA	NA	21.405	22.2276	NA	22.2263	23.3565	22.0342	NA	22.0174	21.7808	21.9967	NA	NA	NA	NA	NA	NA	NA	NA	NA	NA	NA	NA	NA	NA	NA	NA	NA	NA	NA	NA	NA	NA	NA	NA	NA	NA	NA	NA	NA	NA	NA	NA	NA
A0A0C4DGB6	39.86	39.7584	39.7674	40.0009	39.6963	39.725	38.8348	39.0967	39.1304	39.3114	39.4335	39.2585	39.81	39.2436	38.618	39.2715	39.7694	39.1078	40.6586	40.3592	39.6099	39.601	39.6391	40.0456	40.1194	40.1674	40.1959	41.0583	39.2013	39.1786	38.7738	40.542	39.5222	40.1504	40.2768	40.4715	40.367	39.8392	39.2011	39.2117	40.1624	39.9484	40.5044	40.3706	40.3145	40.4403	39.7817	40.2331	40.6471
A0A0C4DGH0;Q5ZPR3	NA	24.8614	NA	NA	NA	NA	NA	24.5397	24.6271	24.2158	NA	24.338	24.1325	24.2302	NA	24.2542	NA	25.6786	25.4542	25.37	25.8561	24.6687	25.7444	24.6719	24.3647	NA	24.9515	25.5128	24.8459	26.9776	26.2142	NA	24.537	24.6723	24.4887	NA	25.1431	24.8446	24.6763	24.6964	NA	24.7802	24.9767	25.0034	24.2771	25.0676	NA	NA	24.5949
A0A0C4DGQ5;P04632;K7ELJ7;K7EKD8;K7EIV0;A0A075B7C0;U3KQE2;K7EM73;U3KPR7	28.5563	28.5847	28.3957	28.365	28.5883	28.5599	28.6441	28.6458	29.1522	28.6883	28.5425	28.3344	28.3878	27.7499	28.4327	28.5593	28.2153	29.1405	29.498	29.6047	29.153	28.9443	28.7212	28.4024	29.3331	29.0838	29.139	28.4438	28.6476	28.7951	28.5106	28.2573	28.4259	29.3655	28.0233	27.969	26.8931	28.254	28.2027	26.7376	27.2091	28.7822	27.9763	28.7811	28.4802	28.3814	28.6704	27.645	29.0169
A0A0C4DGQ8;Q6IAN0;J3KRS1	NA	NA	NA	23.013	22.5839	22.2595	23.7276	NA	NA	NA	23.7058	23.4834	23.0233	22.8698	22.7138	22.3737	NA	NA	NA	NA	NA	NA	NA	NA	NA	NA	NA	NA	NA	NA	NA	NA	NA	NA	NA	NA	NA	NA	NA	NA	NA	NA	NA	NA	NA	NA	NA	NA	NA
A0A0C4DGS0;A0A2Y9D025;P56556;R4GN43	NA	27.0979	NA	NA	25.165	NA	26.7197	26.1509	26.4549	26.8471	26.4577	27.0929	26.6425	NA	26.7453	26.592	NA	26.6139	NA	NA	26.719	NA	25.6724	25.3499	NA	26.2213	26.2625	NA	27.6185	26.5687	26.7645	NA	26.7726	26.3415	26.4562	26.1559	NA	25.5777	26.9825	26.5239	27.3011	27.0044	27.0256	26.8188	27.0687	27.0079	26.0976	27.0616	26.6451
A0A0C4DGS1;P39656	28.0127	28.0783	28.0326	28.0724	27.789	28.1403	28.042	28.0427	28.0669	27.4345	27.9126	27.6615	27.6056	27.5885	27.7417	27.758	27.9012	27.7601	27.7365	27.4101	27.8112	27.5019	27.9918	27.9917	27.8959	27.6196	27.5841	27.6791	27.4535	27.9395	28.4515	27.9875	27.6833	27.8488	27.3873	27.7346	27.1839	27.5689	27.6985	27.7527	27.3672	27.8093	27.4373	27.9723	27.4018	27.6439	27.4885	27.633	28.4491
A0A0C4DGX8;Q15904;A6NLC6	NA	NA	NA	NA	NA	NA	NA	NA	NA	NA	NA	NA	NA	NA	NA	NA	NA	NA	NA	NA	22.7567	23.2303	23.2074	22.4882	22.7875	NA	NA	NA	23.0415	NA	NA	NA	23.0718	NA	NA	NA	23.1486	23.235	22.9533	23.0456	NA	NA	NA	NA	NA	NA	NA	NA	NA
A0A0C4DGZ8;P07359	23.0742	23.4999	NA	NA	NA	NA	NA	NA	NA	23.2235	22.5662	23.0022	23.3281	22.9615	22.8571	23.1137	23.865	NA	NA	NA	NA	NA	NA	NA	NA	NA	NA	NA	NA	NA	NA	NA	NA	24.1553	22.3545	23.0584	23.0133	NA	22.5173	NA	NA	22.9053	23.3367	23.0596	24.6823	23.0972	23.5132	23.3235	23.2989
A0A0C4DH07;Q8N2S1	24.6615	25.9541	24.5054	NA	26.0501	23.7709	NA	25.7837	NA	26.1941	27.3414	24.8614	25.3171	24.7385	26.2569	27.8714	28.41	24.653	25.2229	NA	25.5518	24.3094	24.662	24.6503	NA	NA	25.5684	NA	24.0865	23.472	27.0374	NA	NA	24.9223	24.3198	24.7645	27.1027	24.5814	23.8641	25.3602	25.9981	24.8907	25.5871	24.9987	25.2269	25.2331	25.7821	26.0462	25.5959
A0A0C4DH22;Q9H4G0	24.0539	24.0034	NA	24.6061	NA	NA	23.687	24.2265	NA	24.4497	25.1218	24.6707	25.0497	24.2806	23.7458	25.0067	23.8065	NA	NA	NA	NA	NA	NA	NA	NA	NA	NA	NA	NA	NA	NA	NA	NA	NA	NA	NA	NA	NA	NA	NA	NA	NA	NA	NA	NA	NA	NA	NA	NA
A0A0C4DH24	NA	27.0357	NA	24.1315	NA	26.3782	24.3281	24.6649	NA	NA	24.5157	NA	NA	NA	NA	24.3804	NA	NA	NA	NA	NA	NA	NA	NA	NA	NA	NA	NA	NA	NA	NA	NA	NA	NA	NA	NA	NA	NA	NA	NA	NA	NA	NA	NA	NA	NA	NA	NA	NA
A0A0C4DH34	NA	NA	NA	NA	NA	NA	NA	NA	NA	NA	NA	NA	NA	NA	NA	NA	NA	NA	NA	NA	NA	NA	NA	25.2524	NA	25.057	25.1533	27.3344	NA	24.7907	NA	25.6675	NA	NA	NA	NA	NA	NA	NA	NA	NA	NA	NA	NA	NA	NA	NA	NA	NA
A0A0C4DH38	26.9187	26.9883	26.1513	26.2082	25.4943	25.5329	26.3672	24.4463	24.9729	27.0197	27.2623	25.8689	27.0757	26.387	NA	25.1666	27.0765	25.9168	27.235	27.615	25.0667	25.4061	26.2907	NA	24.6039	27.2819	27.81	26.2051	NA	NA	NA	27.9855	25.381	25.7427	25.2605	25.5218	25.2138	25.607	25.0287	NA	NA	27.1069	27.0321	25.8386	28.0022	26.4423	NA	NA	27.1815
A0A0C4DH67;A0A0C4DH69	26.0158	25.3987	25.2525	25.6626	25.8386	25.5182	24.1132	25.3994	25.6385	25.4465	25.923	25.7663	25.4847	25.2893	23.5826	25.929	25.6592	25.9224	27.6971	26.9701	NA	25.4145	24.299	NA	26.3555	25.7244	25.3954	27.3499	24.2053	24.1689	NA	27.0058	25.1196	NA	25.8927	NA	NA	NA	NA	NA	NA	24.931	25.531	25.9689	26.2232	24.9073	NA	NA	25.8991
A0A0C4DH68;A0A075B6R9	27.411	27.9232	26.8915	27.3455	27.3535	27.5839	26.3322	27.3808	27.6404	27.101	26.3346	27.9526	25.5293	27.3054	NA	27.1441	27.5747	NA	NA	NA	NA	NA	NA	NA	NA	NA	NA	NA	NA	NA	NA	NA	NA	NA	NA	NA	NA	NA	NA	NA	NA	NA	NA	NA	NA	NA	NA	NA	NA
A0A0D9SF54	25.8341	25.7823	NA	25.4772	26.5165	NA	25.413	25.7365	NA	27.1946	26.7672	26.9858	27.1243	27.1332	26.1536	26.3939	26.3595	25.8934	25.2016	NA	26.2775	26.1936	24.9218	25.6516	26.2823	26.3805	26.4387	26.3288	26.4272	25.8816	NA	NA	26.0678	26.0573	26.9818	27.0933	26.5445	25.8454	26.3278	25.607	NA	27.0486	27.4317	27.5782	27.243	27.8354	27.0249	27.6289	27.6955
A0A0D9SFK2;Q92614	NA	NA	23.86	NA	NA	24.1263	NA	23.8578	NA	24.7194	23.988	NA	NA	24.713	24.3593	NA	24.0915	NA	NA	NA	NA	NA	NA	NA	NA	NA	NA	NA	NA	NA	NA	NA	NA	NA	23.7497	23.8002	24.7426	24.4978	23.2983	NA	NA	23.4884	24.1145	24.5795	23.9702	24.1028	NA	23.9066	23.6158
A0A0D9SFL3;B0QYK0;C9JGE3;Q01844;H7BY36	24.9758	NA	24.3529	25.2881	24.7848	25.0346	24.3337	24.29	24.8076	24.7014	24.8094	24.6954	25.2901	24.495	24.1673	24.8961	25.0701	25.2741	25.2507	NA	24.7067	NA	24.8132	24.4445	24.6212	25.2573	25.6778	25.9038	24.666	25.2646	25.8105	NA	25.0163	25.4678	NA	24.9938	NA	25.7549	NA	NA	NA	25.1779	24.7096	25.19	24.636	25.7656	26.218	25.3979	25.2718
A0A0D9SGF6	27.3524	27.5844	27.5155	27.5109	27.7463	27.5291	26.6986	27.308	27.3765	27.8591	27.5536	27.5197	27.578	27.9567	27.0339	27.5436	27.7077	26.8849	NA	26.753	26.6481	26.9955	25.8357	26.5277	27.9825	27.6667	28.0691	27.4617	27.3974	27.3475	27.8566	26.9829	27.8936	27.4418	27.1247	27.6512	27.9428	27.864	26.7267	27.7096	28.1573	28.1308	28.2541	28.127	28.111	28.6992	27.8613	28.5163	28.1277
A0A0G2JIW1;P0DMV9;P0DMV8;V9GZ37	32.4787	31.8722	32.424	31.7224	31.9335	31.4747	32.078	32.6916	31.2256	32.0568	31.8829	32.2933	31.6293	31.9386	32.3763	32.3525	31.8699	31.937	31.6483	32.2655	31.9399	32.1441	31.8834	31.6798	32.1387	31.651	31.7478	32.3457	31.7473	31.3957	32.3806	31.5957	32.3029	32.2647	32.1666	31.6001	31.9426	31.5269	31.8759	32.4012	32.2341	32.1592	32.5296	32.5282	31.9787	31.9642	31.9608	32.7216	31.6546
A0A0G2JKZ1;A2AB90;A0A0G2JH37;A0A0A0MSV9;O15533;A0A0A0MT98	25.4135	NA	25.5587	NA	NA	NA	24.2236	24.4476	24.3839	NA	NA	24.9084	NA	24.7691	NA	25.4417	25.3235	NA	NA	NA	NA	NA	NA	NA	NA	NA	NA	NA	NA	NA	NA	NA	NA	24.696	NA	NA	24.9573	24.9156	NA	NA	25.6129	NA	NA	25.0756	NA	NA	24.9564	25.019	25.4601
A0A0G2JLV0;A0A087WYD6;X5CMH5;Q03519;A0A140T9S0;E7ENX8	24.7455	NA	24.6891	24.653	23.8958	NA	24.326	NA	NA	NA	NA	23.9607	NA	NA	NA	NA	23.5352	NA	NA	NA	NA	NA	NA	NA	NA	NA	NA	NA	NA	NA	NA	NA	NA	NA	NA	NA	NA	NA	NA	NA	NA	NA	NA	NA	NA	NA	NA	NA	NA
A0A0G2JMB2	27.8023	28.04	29.5185	28.4883	27.0597	NA	NA	28.0724	NA	28.4133	28.1539	29.1415	29.7605	27.9455	25.8054	28.6488	28.7301	25.8543	29.5282	31.0525	27.5076	28.9852	26.8731	28.7221	28.7344	28.7703	27.879	30.3965	27.1033	27.6552	26.0917	29.2944	26.6823	28.9925	28.9647	28.8923	29.0151	28.1039	NA	27.9054	28.2732	27.5958	27.7945	29.2102	28.5086	28.5114	26.0676	28.4086	27.8987
A0A0G2JMH6;P01903;Q30118;A0A0G2JH46	26.3096	26.0879	25.4824	26.8379	25.8181	26.6193	26.2607	26.3836	26.1015	26.1131	26.8503	26.85	26.3181	26.7351	24.367	26.1604	26.686	27.6808	27.1664	27.0998	28.2313	27.2072	28.3843	27.7125	26.8462	26.8418	27.0871	28.1064	26.7699	27.6001	25.9445	27.4472	26.1217	27.5948	25.2022	27.4293	24.991	26.2684	26.6627	26.0302	NA	27.4619	27.3513	27.6863	26.0917	28.1302	26.7322	27.0788	27.2311
A0A0G2JN29;A0A087X117;Q15155;A0A0G2JP90;A0A087WW46	27.1948	27.0276	27.0712	27.2693	26.9297	27.4493	27.1766	26.6	26.709	24.5749	25.162	26.0024	26.1913	25.0237	25.6169	25.5043	25.9421	25.5673	25.3482	25.0706	25.3742	24.8866	25.9528	24.1559	24.9213	25.9797	25.7502	NA	25.5038	26.6214	26.2872	26.1278	25.902	25.8573	25.6347	26.4254	26.5084	26.85	26.0805	26.2733	26.5652	25.9354	25.041	25.9588	25.6715	25.6331	25.8134	25.9785	25.9643
A0A0G2JPD5;A0A0G2JMX7;P10636	NA	NA	21.9878	NA	NA	NA	NA	22.4112	NA	22.6907	NA	23.4923	NA	22.0752	22.3315	22.2178	21.9904	NA	NA	NA	NA	NA	NA	NA	NA	NA	NA	NA	NA	NA	NA	NA	NA	NA	NA	NA	NA	NA	NA	NA	NA	NA	NA	NA	NA	NA	NA	NA	NA
A0A0G2JR38;E9PHT6;Q9NVE7;H0YA26;H0YA31	23.1647	NA	23.4615	NA	23.4573	NA	23.5625	23.9858	NA	23.2663	23.6406	NA	23.5185	23.0157	23.0106	23.7803	NA	23.2669	NA	NA	23.1152	23.2845	NA	23.238	22.741	23.1865	NA	NA	23.1091	NA	23.6235	NA	NA	NA	NA	NA	NA	NA	NA	NA	NA	NA	NA	NA	NA	NA	NA	NA	NA
A0A0G2JRQ6	28.2809	27.6412	NA	26.6117	25.9136	NA	27.0392	25.7735	NA	24.4093	NA	NA	NA	NA	NA	NA	NA	NA	NA	NA	NA	NA	NA	NA	NA	NA	NA	NA	NA	NA	NA	NA	NA	NA	NA	NA	NA	NA	NA	NA	NA	NA	NA	NA	NA	NA	NA	NA	NA
A0A0G2JSC0;A0A0G2JS06;A0A087WSX0	23.5565	24.0851	23.8644	23.1074	23.2792	24.1485	22.6202	24.1208	NA	23.592	23.0088	23.4989	24.4627	NA	NA	23.383	23.9811	22.5267	24.3763	23.9445	22.4568	23.6895	22.6103	NA	NA	23.8227	22.9646	24.0067	23.1179	NA	NA	24.0099	NA	NA	NA	NA	NA	NA	NA	NA	NA	NA	NA	NA	NA	NA	NA	NA	NA
A0A0J9YXF2;J3QT77;A0A0J9YYG4;Q15165;G3XAK4	26.0258	25.4982	26.006	26.392	25.474	25.3393	26.1974	26.1962	25.7394	25.5881	25.8198	25.5617	26.0333	26.03	25.6747	25.4466	25.7482	26.2096	25.6139	24.8247	26.0099	26.1735	24.8752	25.6747	25.6136	25.6031	25.6446	24.9729	25.7448	25.3899	25.3639	26.6449	25.4027	24.5762	25.2387	25.2932	NA	24.6498	25.8025	25.6521	NA	25.1824	25.5915	24.7275	25.0355	25.292	24.8759	25.1323	NA
A0A0J9YXM6;Q562E7	NA	23.0635	23.4291	23.1891	23.471	NA	23.6622	23.3107	NA	23.0958	23.3618	22.9126	NA	22.9265	23.258	22.9799	NA	NA	NA	NA	NA	NA	NA	NA	NA	NA	NA	NA	NA	NA	NA	NA	NA	NA	NA	NA	NA	NA	NA	NA	NA	NA	NA	NA	NA	NA	NA	NA	NA
A0A0J9YXN7;Q96Q06	34.2838	33.6441	33.732	33.0696	33.7341	33.7076	33.24	33.9158	33.4806	34.0375	33.4525	33.5314	34.6688	33.5506	33.902	34.1322	34.0929	32.786	33.068	32.9943	33.9218	33.0476	32.6459	33.3544	32.9332	33.5038	34.8307	32.81	34.2542	33.2194	33.0785	33.7144	34.81	34.0273	33.6066	33.1159	34.3857	34.2315	33.6953	34.2125	33.8351	32.3525	34.3243	33.4351	34.9845	35.1601	34.7936	35.0385	33.0496
A0A0J9YY99;P0DP03;P01768	29.844	30.9152	29.735	29.555	28.8788	29.6033	27.9734	28.0586	28.6162	28.1053	28.3654	29.235	28.9201	28.6872	26.4319	29.1123	29.5926	28.3353	31.0599	30.4556	28.0975	28.9182	28.167	29.143	28.7011	29.4694	29.051	30.7736	27.5855	26.9202	NA	30.2764	27.8918	29.0114	28.0204	28.1355	28.3645	29.0378	27.1955	28.1903	28.7004	28.9887	28.8611	29.3869	29.4165	29.1539	27.3838	28.7579	29.531
A0A0J9YYL3;A0A0J9YVP6;A0A0J9YXJ8;A0A0J9YXX5;Q9UHX1;A0A0J9YVR6;E9PQ56;A0A0J9YWM1;H0YEM1;E9PN18;E9PMU7	NA	NA	NA	NA	NA	NA	NA	NA	NA	NA	NA	NA	NA	NA	NA	NA	NA	23.3488	NA	NA	23.5446	NA	25.0817	24.2284	23.8909	NA	NA	NA	NA	25.1006	24.3559	NA	23.7665	NA	NA	24.1048	NA	NA	23.9086	NA	NA	NA	NA	24.4439	23.8967	23.8463	24.3495	NA	25.0703
A0A0R4J2E8;A8MXP9;P43243;D6REM6;D6R991;H0Y8T4;B3KM87	26.2857	25.808	26.2661	25.5678	25.7583	25.9828	25.618	26.0075	25.2785	26.6369	26.5345	27.0993	26.7166	25.6543	27.2635	25.9008	25.1009	26.2131	24.4094	25.07	25.7515	25.3217	26.549	25.5053	24.6945	24.7338	24.7956	NA	26.103	26.6382	25.5275	25.3517	25.8304	25.2156	26.2926	24.84	25.3463	25.2851	25.7183	25.3891	25.505	25.1468	25.9218	25.9237	24.8784	25.032	24.5542	25.2473	25.5892
A0A0R4J2G3;A0A0A0MTJ9;Q6PIU2;H7C046	NA	23.272	22.1036	23.2745	NA	22.1192	22.6099	22.2855	22.4521	NA	NA	22.0031	NA	NA	NA	NA	NA	25.7295	23.0814	26.357	25.2253	22.8127	27.3658	22.8978	23.3532	22.2213	NA	NA	NA	28.0265	22.5012	NA	22.3916	22.5383	NA	NA	21.9584	22.1243	NA	21.4604	NA	23.4118	NA	22.726	NA	21.9455	21.7878	22.7793	22.6233
A0A0S2Z4G6;P09493	24.0867	24.525	23.2648	NA	NA	NA	NA	NA	NA	NA	23.9891	NA	24.4253	NA	24.1534	26.4795	23.9106	NA	NA	NA	NA	NA	NA	NA	NA	NA	NA	NA	NA	NA	NA	NA	NA	NA	NA	NA	NA	NA	NA	NA	NA	NA	NA	NA	NA	NA	NA	NA	NA
A0A0U1RQI5	25.2426	NA	26.6735	26.7224	27.0084	NA	26.5882	27.8196	27.2515	27.0586	27.8494	27.491	27.8481	26.974	27.4151	27.787	26.4898	NA	NA	NA	NA	NA	NA	NA	NA	NA	NA	NA	NA	NA	NA	NA	NA	NA	NA	NA	NA	NA	NA	NA	NA	NA	NA	NA	NA	NA	NA	NA	NA
A0A0U1RR22;Q9UNF0	24.8358	25.6927	24.7783	24.9962	25.0651	25.4934	25.0714	25.5952	24.739	25.043	24.9022	24.6973	24.9315	25.3717	24.9759	25.1741	25.1122	24.9895	25.2861	NA	NA	25.1999	25.5013	NA	25.5158	25.2137	25.399	NA	NA	25.6138	25.5344	24.905	25.2582	25.4375	NA	25.7855	25.6496	26.0509	NA	NA	NA	25.5499	25.352	25.8338	25.5145	25.3326	25.7318	25.6342	25.8095
A0A0X1KG75;A0A0D9SG04;Q53SF7	23.1961	NA	23.1695	23.8748	23.8293	23.4973	23.404	23.4263	24.0649	NA	24.3617	24.4099	25.5323	24.0689	23.5792	23.8811	23.7653	NA	NA	NA	24.0327	23.5763	23.7866	23.5857	24.0195	NA	23.0007	NA	25.1014	NA	NA	NA	23.6386	NA	24.2085	23.3914	23.5059	23.6099	24.1463	23.6872	23.1884	NA	24.5988	NA	NA	23.4584	NA	NA	NA
A0A140T9I0;A0A140T9X5;A0A140T913;P01892;A0A140T955;A0A140T933;A0A1W2PRT9;A0A1W2PPQ2	28.5628	27.1521	28.4184	28.6095	28.5702	28.1102	28.1848	27.9668	27.4942	27.1318	27.011	27.8821	28.0115	27.7176	27.5692	27.9962	28.8677	28.3019	27.841	28.9542	28.5861	28.1074	28.6627	28.6352	27.9949	27.7448	27.6753	28.4855	28.1356	28.1963	27.5636	28.7921	28.4837	27.6685	27.8186	28.4448	28.8235	27.9808	27.9885	28.2615	26.8079	28.4101	28.2514	28.4942	28.3959	28.7751	28.5836	28.5449	28.8238
A0A140T9T7;Q03518	25.171	23.5179	24.1111	NA	NA	23.4448	23.0997	NA	NA	NA	NA	NA	NA	NA	NA	NA	NA	NA	NA	NA	NA	NA	NA	NA	NA	NA	NA	NA	NA	NA	NA	NA	NA	NA	NA	NA	NA	NA	NA	NA	NA	NA	NA	NA	NA	NA	NA	NA	NA
A0A140TA86;Q5XKP0	25.1825	NA	24.1788	24.833	NA	24.7244	25.0338	25.9003	NA	25.1574	26.0423	24.9814	25.377	NA	25.6116	24.6737	26.0719	NA	NA	NA	NA	NA	NA	NA	NA	NA	NA	NA	NA	NA	NA	NA	NA	NA	NA	NA	24.8294	NA	NA	NA	NA	24.6588	NA	NA	25.1046	24.1059	24.8382	25.1685	23.8306
A0A1B0GTG2;A0A1B0GW77;P49419;A0A1B0GTJ4;A0A1B0GUA1;A0A1B0GW82;A0A1B0GTY9;A0A1B0GV49	27.8886	28.4851	27.7943	27.7452	27.983	27.886	27.2278	27.9935	27.9788	27.1276	27.8281	27.641	27.3913	27.7771	28.0572	28.3566	28.1934	27.718	27.3453	26.6918	27.9374	27.5205	27.4355	28.1012	28.2976	27.4681	27.9569	26.72	28.126	27.3612	28.171	27.5027	27.335	27.4759	27.2307	27.7164	27.6482	27.2829	26.9819	27.785	27.5477	27.6996	28.072	27.8217	28.0264	27.3301	27.5606	28.4532	28.904
A0A1B0GTU4;P49023;F5GZ78;A0A1B0GU60	24.6497	NA	24.9962	24.2866	24.1818	NA	24.0926	24.2576	NA	NA	24.0257	24.1746	23.6816	24.7675	24.4653	25.3195	NA	24.4168	23.151	24.1593	24.0909	24.3584	24.7296	NA	NA	24.4206	NA	NA	24.5462	25.2711	24.7495	NA	25.1403	NA	24.8354	NA	25.1295	NA	24.0504	24.7594	25.1883	NA	NA	NA	NA	NA	24.5575	NA	NA
A0A1B0GUC3;A0A1B0GV98;A0A1B0GTC5;A0A1B0GU26;A0A1B0GTC3;A0A1B0GVH5;Q9C0B1;A0A1B0GTY1	23.8176	NA	NA	NA	23.5022	NA	24.1794	NA	NA	NA	24.0564	24.6944	24.3341	24.5206	23.984	24.0182	23.6945	NA	NA	NA	NA	NA	NA	NA	NA	NA	NA	NA	NA	NA	NA	NA	NA	NA	NA	NA	NA	NA	NA	NA	NA	NA	NA	NA	NA	NA	NA	NA	NA
A0A1B0GVD5;A0A1B0GWE8;P07339;A0A1B0GW44;A0A1B0GVP3;A0A1B0GV23;A0A1B0GU92;A0A1B0GU03;C9JH19;H7C469;F8WD96	31.2509	31.1959	30.6191	30.5277	30.7319	30.0669	30.5987	30.4125	30.2426	30.2251	30.1141	30.8934	30.2011	30.3939	30.4607	30.3144	30.273	30.8545	30.9957	31.146	31.4356	30.3305	31.1432	30.5749	29.8195	30.4726	30.0352	31.6278	30.9243	31.4252	30.8378	30.6967	30.5016	30.7606	30.3107	30.8391	30.6241	30.8575	30.5187	30.921	29.3147	30.4649	29.5486	30.1419	29.8501	30.701	30.8169	29.8383	30.4776
A0A1B0GVL3;Q05086;A0A0D9SG77	NA	NA	23.8827	NA	NA	NA	23.7098	NA	NA	NA	23.6512	23.5762	23.6996	NA	23.9176	23.6714	NA	NA	NA	NA	NA	NA	NA	NA	NA	NA	NA	NA	NA	NA	NA	NA	NA	NA	NA	NA	NA	NA	NA	NA	NA	NA	NA	NA	NA	NA	NA	NA	NA
A0A1B0GW68;A0A1B0GUA4;A0A1B0GTM3;Q13510;A0A1B0GTP7;E7EMM4;A0A1B0GTZ5;A0A1B0GUH5;A0A1B0GUE3;A0A1B0GUG1;A0A1B0GUW4;A0A1B0GVG2;A0A1B0GU62;A0A1B0GUB3	29.4346	28.6655	29.2646	29.2843	30.4515	28.5804	29.6335	29.2722	28.5473	29.4276	28.9973	28.8616	29.1034	29.5062	28.5883	28.4549	28.2274	29.9243	28.8943	27.051	29.3453	28.2216	28.6481	28.7122	26.8569	29.4976	27.9267	29.3502	29.6282	28.6683	28.0533	28.7555	28.7663	28.4698	29.1437	28.7422	29.0414	28.4075	28.845	28.4035	28.2926	28.2131	28.2908	28.2737	28.2386	28.661	28.1038	27.7862	27.7159
A0A1B0GWF2;A0A1B0GVQ5;A0A2R8Y5D4;A0A0D9SG72;A0A1B0GTP9;P61764;A0A1B0GW76	25.7553	NA	26.6009	25.6031	26.0482	26.1045	26.6066	26.7612	25.6833	26.9595	27.287	26.4637	26.2998	26.4457	26.6004	26.8813	26.1376	26.3185	NA	NA	25.9252	26.6081	24.4919	25.8479	26.3953	25.6661	26.7677	NA	26.6784	24.8352	25.9365	NA	25.8405	25.1957	26.1482	24.4689	26.0886	NA	26.1852	26.5668	NA	25.7685	26.1941	26.1842	26.4814	26.2649	25.8413	25.7592	24.3502
A0A1B0GWJ0;A0A1B0GTJ7;P30566;A0A0A6YY92;A0A1B0GTG9;A0A1B0GWF8;A0A096LNY5;A0A096LNY6	26.5357	26.498	26.2888	26.3494	26.1378	26.3873	25.8318	26.0623	26.542	25.9096	24.7548	26.0268	25.7789	26.8752	25.9916	26.5275	26.9537	26.3153	28.43	28.3925	26.0605	27.2265	26.6689	26.1146	27.5334	27.4222	27.6734	26.344	26.0145	26.4697	26.2379	27.1214	26.3477	26.208	25.6703	26.486	26.4447	26.3156	26.1288	25.647	26.7781	25.8582	24.8944	26.194	27.2641	25.8852	26.3851	26.5591	26.1965
A0A1W2PNR9;Q9Y5U9	24.877	NA	24.5246	25.0582	NA	NA	25.423	NA	NA	25.109	25.1917	25.0587	24.7184	NA	24.4766	24.536	NA	NA	NA	NA	NA	NA	NA	NA	NA	NA	NA	NA	NA	NA	NA	NA	NA	NA	NA	NA	NA	NA	NA	NA	NA	NA	NA	NA	NA	NA	NA	NA	NA
A0A1W2PNW1;P42226	24.9573	24.6055	24.9992	24.8272	25.0086	24.3558	25.4579	24.9552	24.1457	24.4011	24.9922	24.8858	23.8064	23.711	24.7017	24.7387	24.2447	24.8042	24.4614	24.8848	24.7315	25.1015	25.6585	NA	26.0648	23.6643	24.6048	NA	24.6387	25.0022	24.4777	24.8066	24.7152	24.8473	25.0691	24.5994	23.9094	NA	24.5057	24.4202	24.6776	24.8717	25.184	24.5818	24.7952	24.4316	24.4097	24.3606	24.8695
A0A1W2PNX8;Q9H3U1	22.8081	22.9499	24.5249	22.8354	23.2399	NA	23.735	23.4069	NA	23.4227	23.1826	24.297	23.8952	22.3703	23.7158	23.3745	22.7973	23.3816	23.2455	23.1061	23.3072	23.4421	NA	NA	NA	NA	22.492	NA	23.1214	NA	NA	NA	NA	NA	NA	NA	NA	NA	NA	NA	NA	NA	NA	NA	NA	NA	NA	NA	NA
A0A1W2PPR6;A0A1W2PNP0;Q969N2;A0A1W2PP57;A0A1W2PPC3;A0A1W2PPS0;A0A1W2PQN1;F6W983;A0A1W2PRZ8;A0A1W2PP53;A0A1W2PPQ7;A0A1W2PR92	NA	NA	NA	NA	NA	NA	NA	NA	NA	NA	NA	NA	NA	NA	NA	NA	NA	24.0879	NA	23.3629	23.9497	24.1348	24.1167	23.7381	24.5778	NA	NA	NA	23.4563	NA	22.8102	NA	NA	NA	23.6522	23.3778	NA	22.7112	23.1417	NA	23.5928	NA	NA	23.2442	NA	NA	NA	NA	NA
A0A1W2PPR8;P01889;F6U0H7	26.8157	26.1731	25.8754	NA	25.8151	26.3553	26.1555	26.4916	NA	NA	24.5966	26.0469	25.4275	26.7399	NA	NA	27.5381	26.9217	26.4191	26.4328	25.3718	26.767	26.8209	27.3515	25.4464	25.6616	25.828	27.1592	24.7223	27.8489	26.9181	26.8933	27.3277	27.0304	26.1562	25.797	NA	27.0813	26.2163	27.2923	26.2914	26.4522	26.2455	NA	26.0974	27.514	26.7869	26.4382	27.8953
A0A1W2PPS1;Q00839;A0A1X7SBS1;A0A1W2PP35;Q5RI18;A0A1W2PQL0;A0A1W2PP34;A0A1W2PPL4;A0A1W2PPH7;A0A1W2PQ74;A0A1W2PRZ7	28.7478	28.4712	28.7756	28.2013	27.9757	28.994	28.4541	28.0107	28.014	28.3691	29.0017	29.0851	28.5325	27.9344	28.6243	28.2082	27.857	28.5537	27.3301	28.9268	28.3455	28.1052	28.7068	28.1154	27.8967	28.1723	28.0654	28.4123	27.9452	28.5677	28.5363	28.5099	29.0217	28.4411	29.1193	27.7328	28.1806	27.6505	28.3802	28.616	27.4548	28.4602	28.8333	28.7446	28.0082	28.1688	28.4245	28.9915	29.1363
A0A1W2PRW4;P53816	24.1291	24.9153	24.5488	24.6466	NA	NA	24.736	24.8505	NA	25.5193	25.4364	24.3837	25.234	24.5682	25.3443	24.5803	NA	NA	NA	NA	NA	NA	NA	NA	NA	NA	NA	NA	NA	NA	NA	NA	25.1419	24.8555	24.874	25.0706	NA	NA	NA	24.9944	NA	24.4606	NA	NA	NA	NA	24.6033	NA	NA
A0A1W2PS43;Q14108;A0A1W2PPX5;A0A1W2PQR6;A0A1W2PQB7;A0A1W2PRS1;A0A1W2PPU6;A0A1W2PRF6	27.8222	27.7614	27.1964	27.3074	28.0976	27.9675	27.7243	27.6343	27.5749	27.895	27.8095	28.0502	27.4406	27.8648	27.4704	27.1656	27.667	27.6199	26.7825	26.7656	27.2704	27.3469	27.9609	27.8377	NA	27.4427	27.2555	27.152	27.3606	28.073	27.5443	26.749	26.5205	26.828	26.4646	26.2679	27.331	27.4938	27.4852	27.5904	28.0083	27.5932	27.2946	27.6371	26.9527	27.2873	28.0679	28.1997	28.1713
A0A1X7SBZ2;A0A1W2PQ51;Q92841	26.6638	27.4876	26.2307	27.2437	26.823	27.3959	26.4858	26.9769	26.9746	26.441	25.9683	26.6381	26.408	27.1959	26.6381	26.6993	26.5806	26.802	26.8844	26.7745	26.7534	27.0022	27.0498	27.6559	27.6179	26.0017	26.2536	26.4307	26.4196	27.305	27.5904	26.3215	26.8332	26.7926	25.6058	27.2078	26.6099	27.216	26.6569	27.1725	26.2502	26.9344	27.0027	28.1701	27.0716	26.6067	26.8922	27.3062	27.9919
A0A286YEY1;P01876	34.1018	34.6841	33.9593	34.001	33.51	33.59	33.006	33.4284	32.1226	33.0026	32.9848	34.0026	34.4782	33.7385	32.554	33.3161	33.9194	32.5281	35.7927	35.5603	32.7918	34.4215	33.9245	33.3301	33.7446	33.9148	33.7679	35.4812	32.3456	33.2836	32.2394	34.5695	33.1986	34.9372	33.6892	33.8786	34.1384	34.3835	33.102	33.6606	33.4973	33.2866	33.5883	34.5635	34.7581	34.2192	33.095	33.7248	33.6551
A0A286YEY5;P01877	26.0546	26.397	24.7244	25.3708	29.1986	28.0716	26.9912	29.2438	27.8574	NA	NA	NA	NA	NA	NA	NA	NA	24.0898	25.4814	26.7925	NA	25.3864	24.8315	24.083	26.353	24.9962	25.5956	27.6075	24.4391	24.968	NA	NA	24.4851	27.5948	28.6055	27.1006	27.4358	28.7045	28.0221	28.1472	NA	28.3099	27.4289	28.9237	29.3269	28.6323	27.0627	27.5527	27.786
A0A286YF22;O43175;A0A2C9F2M7;A0A286YFA2;A0A286YFL2;A0A286YFM8	30.0232	29.3504	30.699	29.7095	31.1779	29.7462	29.21	29.8299	30.4305	29.9766	30.526	29.9481	30.6372	30.5206	30.0082	30.5145	30.3861	27.5688	27.6891	27.8826	28.5006	27.7766	27.85	28.5761	29.2858	29.4679	29.8991	29.1652	30.173	27.9621	29.9877	29.9158	30.6085	28.7208	29.9947	29.515	30.7928	29.5166	28.6692	29.8518	30.3227	30.334	30.7958	30.1198	31.1194	30.7654	30.1784	30.639	31.0876
A0A286YF23;A0A0J9YY01;Q96JP2	NA	NA	NA	NA	NA	NA	NA	NA	NA	NA	NA	NA	NA	NA	NA	NA	NA	NA	NA	NA	NA	NA	NA	NA	NA	NA	NA	NA	NA	NA	NA	NA	NA	NA	NA	NA	NA	NA	NA	NA	NA	22.8175	22.7983	NA	NA	NA	22.7731	NA	23.0217
A0A286YFJ8;P01861	31.1232	30.5823	31.6964	28.2633	30.9683	28.9225	29.3241	29.2872	28.7599	30.6554	28.0411	29.7482	30.1293	28.6668	28.7337	30.6176	32.1629	29.9723	32.1424	32.4398	27.3186	28.432	29.0801	29.9528	28.8194	31.2331	27.8856	31.1817	29.0136	26.629	27.0054	32.9216	30.2746	30.9283	31.1747	25.9679	30.0947	28.1785	29.1355	28.5924	28.6755	30.7557	28.8076	30.3844	30.9742	28.4706	28.6394	30.2075	32.2005
A0A2C9F2P4;A0A286YFF7;P50897;Q5T0S4;A0A286YFE3;A0A286YFL8	26.0563	25.9117	25.1438	25.8302	26.4949	26.1007	26.0561	26.0911	25.986	26.0393	26.1091	25.7107	25.7833	25.7103	25.7593	25.6109	25.6821	25.673	25.3812	NA	25.2816	25.1078	25.3975	25.428	24.9434	25.2078	25.7001	26.0797	25.1455	25.1863	24.7989	25.7452	26.1703	26.1796	26.06	26.2261	26.7789	26.2906	26.363	26.399	26.0491	25.0576	25.798	24.9052	25.5864	26.1887	26.2001	25.8788	25.8537
A0A2Q2TH77;Q08379	23.8899	24.5384	23.7479	24.287	24.1078	24.1635	24.4118	24.2532	23.6148	24.4584	24.1639	24.4895	24.1021	24.6099	23.8634	24.0765	24.2088	24.6699	23.9166	23.5217	24.5011	23.9167	24.2645	24.8052	23.6818	24.2126	23.8375	NA	24.3077	24.6348	24.019	NA	24.1729	23.8411	24.5132	25.0872	24.5774	24.4888	24.5999	24.3124	24.5988	24.269	24.3166	24.5822	24.3376	24.2716	24.0147	23.9724	24.4774
A0A2Q2TTZ9;P01594;P01593	29.3908	29.0802	29.0037	28.7561	28.6865	28.3885	28.5799	28.784	28.6936	28.2388	28.9893	29.0046	29.8801	28.9474	27.3197	28.9534	30.843	29.5526	30.4364	29.8326	28.4189	28.391	29.0132	28.8174	29.1473	28.8579	28.5537	30.3622	27.6931	27.8056	25.6214	30.3932	29.171	28.9675	28.778	28.166	28.2036	28.232	28.6225	27.3275	28.0306	28.8128	26.4891	29.2166	29.5302	29.2417	27.1764	28.6751	29.2897
A0A2R8Y484;Q08722	27.8785	28.1377	28.0108	27.1195	27.2721	28.474	26.9404	27.4179	NA	NA	26.2344	26.4893	26.7025	25.2434	25.4401	26.8064	26.8805	NA	NA	NA	25.7117	NA	25.1246	23.4169	26.4922	27.1329	27.5971	NA	25.6436	26.6326	25.6685	26.3618	27.6917	28.1804	26.8661	27.1836	28.0514	27.949	26.988	27.6312	27.8683	27.8553	27.0678	27.7602	27.563	27.6594	27.8087	27.7105	27.8819
A0A2R8Y4T1;E9PGF5;Q9HBL0;E9PF55;A0A087WWW7;H0Y4U1	31.0171	30.6773	31.9368	30.6616	31.2086	30.5678	31.5232	31.5064	30.9806	31.8082	32.6234	32.3773	31.8109	31.7867	31.6859	32.0171	31.806	31.5511	30.5464	31.3941	31.8483	31.816	31.0661	31.08	31.8558	31.3787	31.9866	31.857	31.7782	31.2207	30.5059	32.1643	31.7667	30.7032	32.0064	30.6959	31.2041	30.2986	31.7647	31.5831	30.8048	30.2534	32.5859	30.309	30.3504	31.4021	29.9268	30.7554	30.1893
A0A2R8Y5G6;A0A0D9SFB3;A0A2R8YF78;A0A2R8YCW1;A0A0D9SG12;A0A2R8YFR4;A0A2U3TZJ9;A0A2R8YFS5;A0A2R8Y4A4;A0A2R8Y645;A0A0D9SF53;O00571;A0A2R8YDT5;A0A2R8Y7T2;F6S8Q4;A0A2R8YDH3	25.6873	NA	25.5728	25.7314	25.4755	25.2331	26.103	26.7369	25.1113	26.3659	25.3659	26.1584	24.429	25.984	26.3014	25.8397	26.0568	26.3066	24.8796	25.8753	26.9585	26.6662	27.3486	26.8472	25.5551	25.0624	24.6971	NA	26.6657	26.6935	24.8418	26.1204	24.6421	24.2159	25.4892	26.1603	25.1222	24.648	25.8229	24.7315	25.2666	25.9957	25.9291	26.6774	25.3461	25.2339	24.7384	25.6782	25.4945
A0A2R8Y5S7;P35241;A0A2R8Y7M3	26.2451	25.7401	26.6409	25.3989	25.2539	25.6329	26.8059	26.2417	NA	26.287	26.9505	26.6415	26.2762	26.1683	25.7627	25.6442	26.3384	25.8305	NA	25.1709	24.4867	24.776	25.4108	25.0661	25.1591	25.7607	25.9199	27.6313	26.2354	26.3839	25.63	24.3647	26.0191	25.3349	26.5309	24.9995	25.2665	25.7637	26.5903	25.4271	26.1964	26.3238	26.2183	26.4942	26.5565	26.1163	25.7737	25.8425	24.9187
A0A2R8Y6J3;P46777	26.457	27.1858	26.9113	26.4937	26.06	26.5013	26.31	26.4806	25.9107	27.1739	27.2465	27.5874	27.1754	26.9821	27.41	27.1293	26.8951	27.3875	26.0182	25.916	27.5447	27.3344	27.8524	27.0876	26.6656	26.809	24.5909	NA	26.6204	27.562	26.2723	25.9263	27.0764	26.5982	26.7947	26.9013	25.6723	25.9465	27.1053	26.1895	25.7339	27.5728	26.6996	27.0968	26.2591	26.8789	27.9385	26.2024	26.6148
A0A2R8Y6Y5;A0A2R8Y6G8;A0A2R8Y5H7;A0A2R8YE16;A0A2R8Y821;A0A2R8Y416;A0A2R8Y628;C9JR67;A0A2R8Y6V3;A0A2U3TZN7;A0A2R8Y621;A0A2R8Y5P8;A0A2R8Y7J1;A0A2R8Y2R1;A0A2R8Y5Q3;A0A2R8Y4X1;A0A2R8Y4E3;A0A2R8Y6U6;A0A2R8YH84;A0A2R8Y5X5;A0A2R8Y5J3;A0A2R8Y4P8;B7Z2R4;A0A2R8YGQ3;A0A2R8Y652;A0A2R8YEY2;A0A2R8Y5J6;A0A2R8Y638;A0A2R8Y5X0;A0A2R8Y5R7;A0A2R8Y5M2;A0A2R8YE48;A0A2R8YFA5;A0A2R8Y504;O43556;A0A2R8Y7Q5;A0A2R8Y448;A0A2…	25.2833	25.4985	25.4987	25.2434	25.7852	25.2237	24.6136	25.4379	24.9466	25.8647	26.0119	25.5876	25.7902	25.2807	24.856	25.7579	26.2641	25.7799	26.0262	NA	25.9754	26.5307	25.2485	25.4248	25.9656	27.1113	27.0119	NA	25.8358	25.6007	26.9361	26.8048	25.1848	25.5045	26.4492	25.6218	26.0304	25.4724	26.143	25.1969	26.0878	25.0647	25.4979	25.0172	25.3357	25.4881	25.4151	25.0006	25.4642
A0A2R8Y7Q9;A0A2R8YEK8;Q9Y5P4;A0A2R8YE59;A0A2U3TZL3;A0A2R8Y5S9;A0A2R8Y5H3;A0A2R8YE18;A0A2R8Y7C5;A0A2R8YFA1	22.809	NA	NA	NA	NA	NA	22.873	NA	NA	24.3422	23.7374	22.839	23.2412	22.7704	22.6051	NA	NA	NA	NA	NA	NA	NA	NA	NA	NA	NA	NA	NA	NA	NA	NA	NA	NA	NA	NA	NA	NA	NA	NA	NA	NA	NA	NA	NA	NA	NA	NA	NA	NA
A0A2R8Y804;A0A2R8Y543;A0A2R8YCH5;A0A2R8Y5A3;P35222;A0A2R8Y750;B4DGU4;A0A2R8Y7Z0;A0A2R8Y5C3;A0A2R8Y5Z1;A0A2R8Y6G0	27.2142	26.9463	27.1484	26.8286	27.3083	27.0354	27.1554	27.4275	26.8414	27.1227	27.1112	27.2327	27.3531	27.2625	27.2866	27.316	26.9521	27.2293	26.5855	26.7346	26.4958	27.1953	26.8916	27.4096	26.7816	26.9826	26.9871	27.2384	27.1436	26.9751	27.1763	27.2099	27.1405	26.5706	26.8262	26.2249	27.2747	26.7368	26.8859	26.8963	27.3258	27.4139	27.6075	27.3706	26.7214	27.0725	27.2974	27.2	27.1801
A0A2R8Y811;P62263;E5RH77	27.9848	28.089	28.4243	27.4254	27.2846	27.747	28.2496	28.188	27.9807	28.0051	28.2215	28.2918	28.022	27.6996	28.0203	27.7168	28.0983	28.1714	27.0665	27.541	27.7296	25.3409	28.2699	27.7771	26.8079	27.351	27.3577	26.9267	28.0773	28.4251	27.5092	27.0056	27.9015	27.5532	29.0064	27.9888	28.1393	28.4933	28.9687	27.8371	28.7747	27.0919	27.9512	27.5885	26.8558	27.7488	27.9939	27.4456	27.5902
A0A2R8Y851;P62273;A0A2R8Y6P7;A0A087WTT6	26.8356	25.4598	25.9174	26.7468	26.261	26.3487	26.4788	27.4489	NA	26.3991	27.0344	26.6122	26.7078	26.6955	27.17	26.8416	26.7796	26.3135	NA	NA	27.1889	25.6232	26.36	NA	26.065	NA	25.1239	NA	27.392	26.405	26.1349	NA	27.1539	NA	NA	NA	25.3697	NA	NA	25.3282	NA	26.9548	27.2453	26.9577	NA	NA	25.9667	27.014	26.2295
A0A2R8Y891;P08237;F8VZI0	26.1284	26.2659	26.2258	25.8668	26.1702	25.6279	26.1781	25.9242	26.2479	26.233	26.0667	26.0627	25.786	25.033	25.7152	26.6611	25.7366	25.174	26.404	26.5165	NA	25.711	25.1518	24.9638	25.1952	25.5079	26.0819	NA	25.2699	NA	26.0645	25.9236	25.8067	26.0771	25.6278	NA	25.834	25.4747	25.6096	25.9538	25.7296	26.818	25.9364	26.3723	25.7159	25.5968	25.6027	26.2087	26.4506
A0A2R8YD50;P51659;E7EWE5;G5E9S2;E7ET17;E7ER27;A0A2R8Y7L2	28.4797	28.5642	28.4966	28.5985	28.373	29.0721	29.1247	28.4277	28.4957	28.0998	27.6613	27.9823	27.9954	28.3998	27.6021	26.9427	27.3162	28.4808	27.5171	28.0998	28.2038	28.1463	29.0017	29.1181	27.7704	28.4983	27.4698	28.2804	28.279	29.2688	28.3408	28.0593	28.5009	27.7655	28.0415	28.0198	28.4834	28.7447	28.2643	28.2835	28.4313	28.6251	27.0552	27.9239	27.4909	27.9038	28.1503	27.3703	27.9116
A0A2R8YDQ9;A0A2R8Y6Y7;Q9P2R7;Q5T9Q5	27.6017	28.3441	28.2009	27.9129	28.2382	27.5733	27.8703	27.7273	28.0659	28.1498	28.064	27.9185	27.9541	27.937	28.6005	28.2026	28.0703	27.5858	27.3927	26.507	27.3854	27.5306	26.9488	27.7482	27.7073	27.8202	27.9323	27.3835	27.81	27.1791	28.1014	27.371	28.1808	27.7413	27.1209	27.7727	27.4933	27.5006	27.5397	27.8989	27.9249	28.0789	27.7371	27.8021	28.4143	27.9085	28.3732	27.7717	28.1161
A0A2R8YE10;Q9NRW7;A0A087WU65	24.8293	23.909	24.8689	24.12	24.2006	NA	24.8423	23.9114	23.5043	23.8716	24.1463	23.7101	24.1528	24.5927	24.4323	24.0489	24.3172	24.7457	NA	24.2382	24.9255	24.4023	24.9059	24.9584	25.2377	23.8754	24.2354	NA	24.6984	24.2744	23.683	NA	23.88	23.8769	24.8231	23.7656	NA	NA	24.5015	24.4669	24.8629	24.2653	23.6654	24.2339	23.6434	23.5963	NA	23.614	NA
A0A2R8YE63;Q12929;A0A2R8Y4W2	26.7419	NA	NA	NA	26.692	26.3924	25.346	NA	NA	27.5057	24.9444	26.1129	NA	26.8298	26.2498	25.4338	NA	NA	NA	NA	NA	NA	NA	NA	NA	NA	NA	NA	NA	NA	NA	NA	NA	NA	NA	NA	NA	NA	NA	NA	NA	NA	NA	NA	NA	NA	NA	NA	NA
A0A2R8YEA7	33.3113	32.0629	32.7822	33.3127	33.2089	32.7408	33.3564	33.6581	33.1073	33.3579	32.9739	33.3352	32.7858	33.2861	32.9292	33.0733	33.1016	33.6486	34.5754	34.1075	33.989	33.4011	34.0505	33.6124	33.6849	32.153	31.7868	33.5875	33.124	33.3717	32.9418	33.3331	31.2508	34.1285	33.4156	33.469	29.5669	33.087	33.6209	29.5983	27.6489	33.3849	33.5281	34.0959	33.6711	33.791	33.4433	33.8295	33.7653
A0A2R8YF43;A0A2R8YD58;E7EU96;Q8NEV1;P68400;A0A2R8Y5A0;A0A2R8Y4D6;A0A2R8Y4H0;V9GYA2;A0A2R8YDP2;A0A2R8YFU2;A0A2R8YDY7;A0A2R8YEW1	NA	NA	NA	NA	23.7215	NA	24.5332	25.1183	23.1228	25.0343	23.3206	25.0614	23.783	25.2193	24.7712	NA	NA	24.3838	NA	24.74	23.9953	24.9149	25.398	24.6206	24.8896	23.4919	NA	NA	24.545	NA	23.8128	NA	23.6838	NA	24.9143	NA	NA	NA	24.608	23.4892	NA	24.6044	24.3117	24.625	24.6009	24.5521	24.1039	24.4092	24.0346
A0A2R8YGD1;O14773;A0A2R8Y7U1;A0A2R8YD45	29.4745	29.3873	28.7885	29.3323	29.6748	29.3446	29.106	29.7374	29.4782	29.4781	28.6884	28.576	29.0108	28.7691	29.289	29.1565	29.2145	29.4329	29.7913	28.5749	29.4643	28.7764	29.3038	29.3096	28.4252	28.0448	28.7234	29.2083	29.0986	28.954	28.3515	29.3504	28.9151	29.2897	29.1936	29.9708	28.9705	29.5109	29.7974	29.2923	26.4575	28.5567	28.7646	28.6801	29.133	29.264	28.7637	29.0144	29.1812
A0A2R8YHG5;Q9BZV2;A0A2R8YFC5	25.9166	24.2043	25.713	25.9602	NA	NA	NA	NA	NA	24.2831	25.3334	25.5952	24.7549	NA	25.3736	24.3457	NA	NA	NA	NA	NA	NA	NA	NA	NA	NA	NA	NA	NA	NA	NA	NA	NA	25.0376	25.6454	24.9791	26.1722	NA	NA	24.8825	24.7562	NA	NA	NA	NA	NA	26.1708	NA	24.8917
A0A384DVU0;Q8IY17	22.8017	22.9047	22.8124	22.8158	23.0873	22.9032	24.0255	23.4616	NA	23.7441	23.2627	23.1613	22.7774	22.8774	24.2566	23.3147	NA	23.7226	NA	23.1436	24.3509	23.7308	25.0608	23.9681	NA	22.2553	NA	NA	22.7044	24.9805	22.3524	NA	22.3244	NA	23.623	NA	23.6256	23.3624	23.2339	23.5169	NA	23.5999	NA	23.1511	NA	22.4828	NA	22.4597	NA
A0A3B3IRI3;A0A3B3ISZ5;A0A3B3ITE1;A0A1B0GTW1;A0A2R8YDH4;Q9UDY2;A0A3B3IRV6;A0A3B3IS03;A0A3B3ISF1;A0A3B3IU51;A0A3B3IT83	26.214	25.7668	26.1607	25.7936	25.9087	26.4384	26.3235	26.0178	25.9192	25.9242	26.6712	26.637	26.236	25.7087	26.7311	26.0558	26.4587	25.7844	25.3467	25.6483	25.4456	25.9281	NA	24.8942	25.819	24.727	25.2792	NA	26.5509	25.6336	24.2725	24.654	25.9295	25.3423	26.3315	25.6799	26.01	25.7496	26.4712	26.4656	26.3013	24.7243	26.0687	25.0719	24.788	24.7162	25.5821	25.1884	25.6585
A0A3B3IRM5;P46439;Q5T8R1	NA	NA	23.9967	23.7914	24.1106	24.9626	25.5241	24.5125	NA	NA	NA	NA	NA	NA	NA	NA	NA	NA	NA	NA	NA	NA	NA	NA	NA	NA	NA	NA	NA	NA	NA	NA	NA	NA	NA	NA	NA	NA	NA	NA	NA	NA	NA	NA	NA	NA	NA	NA	NA
A0A3B3IRN5;Q06828	23.8278	NA	NA	23.1179	24.5403	23.8967	NA	24.3035	NA	23.3897	24.191	26.1472	25.4487	24.1068	23.9094	25.3997	NA	26.9471	NA	24.3783	27.8822	26.6846	24.3656	25.6918	26.2028	25.1955	26.536	27.8788	28.227	26.1218	27.5599	26.8525	25.066	23.6589	NA	24.3345	23.4165	24.9717	23.9501	22.8373	23.856	26.0796	25.2155	27.9964	25.1728	24.6246	26.2335	27.4367	27.8216
A0A3B3IRX8;E7EV01;O15484	NA	NA	NA	NA	NA	NA	NA	NA	NA	NA	NA	NA	NA	NA	NA	NA	NA	23.9597	NA	23.7248	23.4882	22.8637	22.7866	NA	NA	NA	22.6125	NA	23.107	22.2279	22.8478	NA	NA	NA	NA	NA	NA	NA	NA	NA	NA	NA	NA	NA	NA	NA	NA	NA	NA
A0A3B3ISG5;P14735	25.1292	25.4308	24.7469	25.2241	26.0484	25.4789	25.1826	24.8833	NA	25.2056	25.2042	25.5138	25.5555	26.0243	25.676	25.1949	25.459	25.4578	26.415	26.1319	25.1383	25.5415	25.9082	24.7567	25.8214	26.1149	25.675	25.2826	25.1845	25.623	25.1089	25.1749	25.4199	25.6141	25.4346	25.7285	25.8145	26.2741	25.9213	25.9689	26.3077	25.3577	25.2631	25.3197	26.2327	25.1542	25.2927	25.5031	25.3774
A0A3B3ISJ1;A0A0S2Z4L3;P07225;G5E9F8;A0A3B3IRK9	27.5357	27.6771	26.8839	27.8532	27.1595	27.4894	26.1464	26.6443	27.3344	26.8018	26.4429	25.3472	26.942	25.8644	25.8582	26.0955	27.5151	24.7734	28.0581	28.7378	24.2093	27.0131	25.4303	23.7594	27.4683	27.6134	27.4615	27.9143	24.6776	25.2469	26.0853	28.3822	26.5946	27.0494	25.1718	26.0804	27.0219	27.3786	25.4674	26.075	26.8495	27.0241	27.2085	26.6088	27.8909	27.1742	26.2324	26.4416	27.4313
A0A3B3ISR2;B4DPQ0;P00736;F5H2D0;A0A3B3ITU4	29.1357	29.0345	28.5922	28.6418	28.6731	28.3804	28.1913	28.4841	28.7191	28.8831	28.7109	28.1797	28.831	28.68	28.6507	28.9276	29.2652	27.989	30.1321	29.5976	27.4799	28.7216	28.8665	28.6073	29.1844	29.0072	28.9236	29.4131	27.8053	27.6314	28.1851	29.2428	27.8732	28.9888	28.5323	28.8084	28.6803	28.593	28.2216	28.3924	28.8694	28.9669	29.0631	28.2651	28.9969	28.9889	28.4188	29.0021	28.392
A0A3B3ISS6;Q14956	26.977	27.3722	26.2332	25.7902	26.8782	27.1463	26.8418	23.6614	25.6016	27.182	26.7722	27.9547	25.7785	25.1004	26.1979	26.2935	25.9345	28.8648	26.362	26.7021	28.4929	26.7966	28.7191	27.7662	NA	25.9207	NA	NA	27.1806	28.4501	27.5185	26.2458	NA	26.4491	25.728	24.8579	25.3758	NA	26.8225	NA	27.4838	25.2945	27.089	25.9837	25.5508	25.8701	NA	NA	25.8355
A0A3B3ISV4	28.0005	28.0309	28.038	28.7289	27.9551	28.4713	27.8033	27.7217	27.6851	27.565	27.004	27.1825	27.6603	27.2216	27.1287	26.6092	26.9772	27.9778	27.2184	27.324	27.7015	28.3597	28.1207	28.0446	28.3098	27.6592	28.1432	26.2418	27.204	27.927	27.1143	NA	27.7423	29.1887	27.5596	28.3535	26.7673	27.7475	27.8473	27.7357	27.2879	27.963	27.3968	26.5068	27.6158	27.4191	27.0758	26.8691	26.3732
A0A3B3ISX9	30.3141	31.4742	29.7381	30.867	31.4968	30.7133	29.1687	31.2004	30.941	31.291	30.9903	30.0574	31.0954	31.1678	29.433	31.1172	31.2966	30.7948	31.0005	30.7516	31.589	30.7413	30.6816	30.241	30.9045	30.8118	31.682	32.0217	30.6846	30.7556	31.5707	30.661	29.9802	30.6765	29.7124	31.1317	31.7663	31.0036	29.5247	31.5219	31.3785	31.2113	31.2518	32.13	31.3003	32.0272	30.8873	32.3053	32.4335
A0A3B3ISY9;E9PC15;A0A3B3ITD0;Q53H12;A0A3B3ISZ0;A0A3B3IUC9;A0A3B3ITV0;A0A3B3ITX7;E9PG39	24.519	NA	24.5956	NA	24.521	25.2967	24.7153	24.578	24.8008	25.8479	24.861	24.3638	24.8706	24.4769	25.4318	25.2647	24.804	24.5674	NA	NA	24.8515	25.0583	24.5384	25.2105	24.8105	25.3925	25.4093	NA	25.2521	24.9527	24.9245	NA	25.1265	24.9234	25.1075	24.9504	24.7482	24.7958	24.7569	24.8601	NA	25.0496	24.7893	25.2598	24.9751	24.3672	25.1545	24.9014	25.2127
A0A3B3ITT1;Q6IQ22	NA	NA	NA	NA	23.5491	NA	23.8438	23.4622	NA	NA	23.4463	23.2016	23.3197	NA	23.6337	23.7473	23.7874	NA	NA	NA	NA	NA	NA	NA	NA	NA	NA	NA	NA	NA	NA	NA	NA	NA	NA	NA	NA	NA	NA	NA	NA	NA	NA	NA	NA	NA	NA	NA	NA
A0A3B3ITT5;P47914	24.635	24.7517	24.8776	24.1702	NA	NA	NA	NA	NA	24.0843	25.1418	25.0881	24.2691	23.8072	25.9154	24.2396	24.501	NA	NA	NA	NA	NA	NA	NA	NA	NA	NA	NA	NA	NA	NA	NA	NA	NA	NA	NA	NA	NA	NA	NA	NA	NA	NA	NA	NA	NA	NA	NA	NA
A0A3B3IUB5;Q8TCT9;A0A075B6F6;A0A0S2Z6F0;A0A3B3IT72	25.482	25.2978	25.0482	25.5871	24.7699	25.5486	24.7843	NA	24.8931	NA	24.89	24.9848	24.8659	22.8181	23.593	24.035	23.4232	NA	NA	NA	NA	NA	NA	NA	NA	NA	NA	NA	NA	NA	NA	NA	NA	24.6333	24.5485	23.9466	24.8236	24.8181	24.2055	24.0723	24.1174	24.0401	NA	24.6196	NA	24.2532	24.5073	NA	24.2346
A0A3F2YNY6;O75400	NA	NA	NA	NA	NA	NA	NA	NA	NA	21.8059	21.8999	21.7002	21.6326	NA	21.8843	21.7756	NA	NA	NA	NA	NA	NA	NA	NA	NA	NA	NA	NA	NA	NA	NA	NA	NA	NA	NA	NA	NA	NA	NA	NA	NA	NA	NA	NA	NA	NA	NA	NA	NA
A0AVT1	27.0796	27.2392	26.5082	27.0855	26.9209	27.3023	27.5058	27.1121	27.0027	27.4523	26.9649	27.4274	27.0242	27.533	27.4754	27.1111	27.2831	27.1719	26.4987	25.9723	26.691	26.6035	26.4796	26.3384	26.7812	26.7008	26.4311	NA	27.0196	26.6909	26.6001	26.5934	26.3494	26.3418	26.74	26.8581	26.5742	26.556	27.1576	26.9329	26.966	26.8968	26.7518	27.0847	26.4913	26.559	25.8936	26.2361	26.3429
A1L0T0;M0R026;E9PJS0	26.1279	25.1351	26.6282	26.7018	25.9955	25.2033	26.355	25.8946	25.3578	26.7027	26.4527	26.8321	26.2559	26.229	25.9829	26.7394	26.1774	26.8239	24.801	25.8042	27.0016	27.1221	26.6658	26.4581	26.2671	26.8505	26.4548	NA	26.7936	26.0287	25.9155	25.2066	25.9393	25.1513	25.2972	25.7121	26.155	24.5856	25.9245	26.5591	24.5954	25.8035	23.702	24.7223	24.5439	23.2148	24.2121	25.7372	24.4366
A2A2D0;P16949	25.2039	25.3721	25.1737	24.9736	24.6846	NA	25.572	25.2491	NA	24.65	25.6148	25.277	25.2639	25.1685	25.1573	25.1548	24.8776	NA	NA	NA	NA	NA	NA	NA	NA	NA	NA	NA	NA	NA	NA	NA	25.0156	24.8395	25.5512	25.4949	NA	25.2805	25.9596	NA	24.8415	NA	25.241	NA	NA	25.3839	NA	NA	NA
A2A2V1;P04156	NA	25.0135	24.2275	NA	24.7562	23.7891	23.5718	NA	NA	24.4722	23.948	23.6988	NA	24.1327	24.7287	24.7602	23.6936	NA	NA	NA	NA	NA	NA	NA	NA	NA	NA	NA	NA	NA	NA	NA	25.2207	25.2192	24.1259	NA	NA	NA	24.325	NA	24.31	24.3766	24.9138	24.8161	NA	24.7901	25.2917	25.6258	25.4181
A2A376;O95786	22.7798	22.3766	22.582	22.378	22.2667	NA	22.7449	23.7713	NA	22.9239	NA	22.9939	NA	22.2226	NA	22.0964	23.3628	NA	NA	NA	NA	NA	NA	NA	NA	NA	NA	NA	NA	NA	NA	NA	NA	NA	NA	NA	NA	NA	NA	NA	NA	NA	NA	NA	NA	NA	NA	NA	NA
A2ACR1;A0A0G2JJA7;P28065	27.0259	25.8537	25.5691	26.2927	25.6708	26.5719	26.4258	26.7027	26.5751	NA	NA	25.8457	NA	25.7138	25.2736	25.3727	25.4439	26.7721	25.8459	NA	NA	NA	NA	NA	NA	25.5371	25.6327	26.3187	25.4739	25.7751	25.8919	NA	26.5304	26.2639	26.3787	26.3449	26.3333	26.3637	NA	26.7136	26.5665	25.6593	26.2497	26.4912	NA	25.8377	25.9175	NA	26.3774
A2RRP1;H0Y5G7	NA	NA	NA	21.5704	21.6761	NA	22.1287	22.0595	21.9557	NA	21.3761	NA	NA	NA	21.4148	21.6099	NA	NA	NA	NA	NA	NA	NA	NA	NA	NA	NA	NA	NA	NA	NA	NA	NA	NA	NA	NA	NA	NA	NA	NA	NA	NA	NA	NA	NA	NA	NA	NA	NA
A5YKK6	23.1542	23.6346	22.7199	22.8256	22.9284	23.337	23.4098	23.0572	NA	23.0646	23.2021	22.9986	NA	22.8555	22.9125	22.8071	23.4287	23.3771	23.2613	NA	23.4363	22.7795	22.7534	22.6924	22.5873	22.6223	NA	NA	NA	23.7462	23.1743	NA	21.8154	NA	NA	24.036	NA	NA	22.3198	22.2904	NA	23.2266	21.9741	NA	21.94	NA	NA	NA	22.5881
A6NC48;Q10588;H0Y984	26.853	25.5659	27.1117	26.8398	27.2398	27.5739	26.3403	26.3492	26.6782	25.133	25.1242	26.4134	25.2548	25.9184	25.9734	25.8725	25.5582	25.5406	25.2099	26.5467	26.5481	26.745	25.3992	25.923	25.378	26.615	25.4258	27.9174	26.5276	26.1871	25.5044	26.6438	27.0243	26.5397	27.0272	26.7329	26.4825	27.4077	26.5711	26.0452	24.763	27.1098	28.121	27.8126	27.6257	26.8082	27.4642	28.6127	28.0935
A6NDG6	NA	NA	23.1113	NA	NA	NA	23.425	23.3947	NA	23.9654	24.3595	23.3937	23.98	23.4373	NA	23.4345	23.6069	NA	NA	NA	NA	NA	NA	NA	NA	NA	NA	NA	NA	NA	NA	NA	NA	NA	NA	NA	NA	NA	NA	NA	NA	NA	NA	NA	NA	NA	NA	NA	NA
A6NEM2;P51610	25.0131	25.3317	24.7828	25.2489	24.7843	25.187	24.666	24.221	24.9564	24.6821	24.5321	25.1332	24.5017	24.9666	25.0662	25.0487	24.9594	24.5733	24.772	24.9378	24.6749	24.8971	25.4032	NA	24.4516	24.4371	24.2136	NA	24.6653	24.582	24.7138	NA	24.7786	24.7101	24.7609	24.8464	24.6139	25.2777	24.7712	24.8438	25.0293	24.861	25.4625	26.2954	24.4857	24.7829	25.5909	24.9081	25.2955
A6NFX8;Q9UKK9;A6NJU6;A6NCQ0	27.4973	27.1726	27.4934	27.777	27.8062	27.6034	27.4666	27.6565	27.5396	27.5136	27.6125	27.6713	27.3318	27.6508	27.0491	27.2374	27.6104	26.4975	26.6329	26.7672	26.4894	26.2075	25.7226	26.5282	26.8975	27.4686	27.6372	28.1035	27.093	26.7639	27.4304	27.6426	27.5045	27.6703	27.4071	27.4909	27.6221	27.7352	27.5063	27.6858	26.3856	27.5499	27.4278	27.5923	27.1469	27.9426	28.1674	27.7981	27.8286
A6NIW2;Q5JSL3	25.3278	25.1204	25.2308	24.9797	24.2845	24.805	25.9097	25.5152	24.2317	26.379	25.5809	26.7145	25.6212	26.016	25.8246	25.4101	25.6293	26.36	NA	25.6958	26.1831	25.448	26.1932	25.4002	25.2073	25.2838	24.6153	NA	25.6283	26.1037	24.8156	NA	25.5279	24.6429	26.1556	24.3345	24.6694	24.5134	25.9667	25.272	25.1657	25.139	24.6308	24.7153	24.8229	24.4116	24.1707	24.6708	24.1843
A6NKZ2;P51606	25.3128	25.9532	25.2196	25.5994	24.7696	NA	NA	NA	NA	24.054	24.3322	24.5757	24.5106	24.6833	24.4656	24.9235	24.7911	25.0573	25.174	25.1492	25.3617	25.2271	25.4932	24.9806	NA	NA	25.2496	NA	24.8653	24.6222	25.3567	NA	27.0104	25.2211	24.2195	25.2444	25.2026	NA	NA	24.2224	25.1508	NA	NA	24.6681	NA	25.1418	24.5185	24.3432	24.1614
A6NML8;K4DI95;C9J6U3;O60879	24.5564	NA	24.8703	NA	27.7637	28.8656	28.1595	24.7087	28.3938	25.5953	25.3868	24.876	25.6624	24.5059	25.7806	26.3209	25.4512	25.741	NA	NA	NA	NA	NA	NA	NA	25.2566	25.5044	NA	27.2249	24.3584	25.4745	NA	NA	25.0557	NA	NA	NA	NA	NA	26.7653	25.9647	27.8113	26.2892	25.5965	26.4377	26.3501	NA	NA	25.5103
A6NMZ7	NA	NA	NA	NA	NA	NA	NA	NA	NA	NA	NA	NA	NA	NA	NA	NA	NA	NA	NA	NA	NA	NA	NA	NA	NA	NA	NA	NA	NA	NA	NA	NA	NA	25.4237	NA	NA	NA	24.8124	NA	26.3811	NA	24.3766	26.471	27.6096	25.6877	27.3271	25.4803	28.2156	27.1389
A6NNI4;A0A2R8Y478;G8JLH6;P21926;A0A087WU13	26.0337	26.9844	24.8825	25.7045	26.2856	26.7129	25.3286	26.0181	26.7588	25.4034	25.5439	26.1186	26.2071	24.6129	25.6359	26.6353	26.6656	26.0796	26.5393	26.5932	26.6909	26.2867	26.5973	26.5333	27.2578	26.9897	26.7714	26.431	25.6668	27.8451	28.5	27.7993	27.6856	27.9583	25.7596	26.6194	26.8527	26.8231	25.6534	26.6883	27.0135	28.3348	26.9928	28.081	26.7877	27.78	27.989	28.4122	28.3115
A6XMV8;A0A0J9YYC8;A6XMV9;P07478	28.6155	28.4594	28.0074	28.8437	29.1025	27.6795	28.1619	27.045	27.1571	28.2797	28.3581	28.433	27.7898	27.9056	27.4636	27.8304	28.2846	27.9795	29.2834	29.6707	28.0967	27.4806	27.0184	28.1275	NA	29.4059	29.3982	NA	28.5621	27.9573	28.2418	30.0629	NA	NA	NA	NA	NA	NA	NA	NA	NA	NA	NA	NA	NA	NA	NA	NA	NA
A8K878;P55145	25.0841	25.0048	24.5632	24.6002	NA	24.4623	25.1399	24.5516	NA	NA	25.2763	25.0335	25.0659	24.6408	24.6363	25.0351	24.5166	NA	NA	NA	NA	NA	NA	NA	NA	NA	NA	NA	NA	NA	NA	NA	NA	NA	NA	NA	NA	NA	NA	NA	NA	NA	NA	NA	NA	NA	NA	NA	NA
A8MQ02;J3KN01;P55196;Q5TIG5	NA	NA	23.0627	NA	NA	NA	NA	NA	NA	23.7422	23.461	23.5125	23.526	22.7659	23.8304	23.6404	NA	NA	NA	NA	NA	NA	NA	NA	NA	NA	NA	NA	NA	NA	NA	NA	NA	NA	NA	NA	NA	NA	NA	NA	NA	NA	NA	NA	NA	NA	NA	NA	NA
A8MT40;Q8NCN5	NA	NA	NA	NA	NA	NA	NA	NA	NA	NA	NA	NA	NA	NA	NA	NA	NA	23.7827	24.1508	23.8189	23.9235	24.0799	24.6103	NA	NA	NA	NA	NA	NA	NA	NA	NA	NA	NA	NA	NA	NA	NA	NA	NA	NA	NA	NA	NA	NA	NA	NA	NA	NA
A8MTY9;O14972;A8MY26	24.0903	24.384	22.9505	24.4374	23.7845	23.0122	23.2092	22.9846	NA	NA	22.3766	22.7494	22.0359	NA	NA	NA	NA	NA	NA	NA	NA	NA	NA	NA	NA	NA	NA	NA	NA	NA	NA	NA	22.5922	22.8602	22.8398	23.0815	23.139	23.4847	23.0447	22.7045	23.1377	23.1201	NA	23.3652	22.7903	22.554	22.5349	22.5626	NA
B0QY89;Q9Y262;B0QY90	25.0704	NA	26.1718	25.0486	24.7884	26.3422	26.4947	24.8446	25.5476	25.9567	25.3685	25.8872	24.1831	25.6178	26.6145	25.8068	25.6423	26.9674	24.9313	24.752	26.7383	26.6577	26.2971	26.8298	26.5668	24.673	24.2992	NA	25.2524	25.8574	26.0763	NA	26.2663	25.9232	26.1001	24.9394	25.1647	25.1314	26.1698	24.9662	24.9992	25.734	25.4227	26.6983	26.0479	24.8184	25.5197	25.855	26.5607
B0QYF8;P02144;F2Z2F1;Q8WVH6	NA	24.0066	NA	23.0583	22.278	23.0442	NA	25.1649	NA	NA	23.5782	NA	NA	NA	NA	29.456	23.0343	NA	NA	NA	NA	NA	NA	NA	NA	NA	NA	NA	NA	NA	NA	NA	NA	NA	NA	NA	NA	NA	NA	NA	NA	NA	NA	NA	NA	NA	NA	NA	NA
B0QZ18;Q99829;A6PVH9;F2Z2V0;E7ENH5;Q5JX58;Q5JX59;Q5JX60;Q5JX44	26.4104	26.4944	25.9597	26.4729	25.5338	26.6104	25.9093	NA	26.9773	26.3864	26.4512	26.055	NA	26.6756	26.0402	26.2964	25.8096	27.1149	27.135	26.6826	27.2096	26.9187	26.852	24.9387	27.3099	26.5159	26.8006	24.3654	24.637	27.4985	27.7476	NA	25.936	26.5979	26.3463	26.5597	25.5821	27.0355	26.2289	23.9231	27.2664	26.8393	26.7239	26.7774	NA	26.6089	25.8534	26.6136	26.2157
B0YIW2;P02656	30.6381	31.0219	30.5062	30.1644	29.9999	28.9254	29.691	29.5446	29.246	29.4601	30.1836	29.0895	29.6462	29.1813	29.2199	29.875	29.9834	29.2622	31.9786	28.8986	29.7692	28.9902	29.4705	29.9008	29.6556	29.2685	29.718	29.1175	29.0146	27.9224	27.9169	29.9749	29.7593	31.6726	30.285	30.0513	30.7952	29.1287	30.2285	28.1569	30.743	28.7371	30.3664	28.4944	28.9882	29.5242	28.4874	29.5208	29.1633
B1AH87;P30536	26.8506	NA	27.0114	27.4275	27.2915	27.9769	28.2471	27.6956	NA	27.8794	27.4854	26.0214	27.9118	26.2412	26.2847	27.4317	25.7946	27.7624	NA	28.0059	27.4642	27.276	27.0179	28.0779	NA	26.826	NA	NA	28.2147	27.2255	26.3018	NA	NA	NA	25.644	27.2439	NA	NA	NA	NA	NA	26.632	26.9295	25.3977	25.9279	28.0974	27.4306	26.617	27.9025
B1AHL2	25.6647	25.1073	26.1144	26.4935	26.5779	25.9051	NA	26.5171	NA	25.9614	25.5915	24.8874	25.254	24.1363	25.2413	26.6396	27.4647	27.7472	27.6838	27.3185	28.7516	26.8999	26.2152	26.9501	26.658	25.6958	26.0992	27.5518	26.5518	25.7576	25.7681	27.28	24.7737	26.1481	26.0657	25.7562	25.1916	24.9422	NA	25.2254	NA	26.4595	26.5979	26.7708	25.4866	24.9569	26.258	26.7269	27.3716
B1AJY7;O75832;B1AJY5	25.9439	25.6362	25.8317	25.8051	26.0587	26.425	26.3689	26.2339	26.8262	26.4123	26.132	25.5396	26.0017	25.4468	25.2566	25.4346	25.5242	26.186	26.5096	26.3716	24.5486	26.4584	25.4358	NA	NA	26.418	26.2047	25.7916	26.251	25.692	25.6372	26.0264	25.2324	25.1177	24.4011	NA	NA	NA	NA	NA	NA	25.1193	25.4178	25.5805	25.4317	25.1544	24.7934	NA	25.3462
B1AK81;A6NEM5;Q92643	22.92	NA	22.5924	23.2166	22.7296	NA	23.6652	22.8021	23.0611	22.9414	22.6314	22.9597	22.8121	23.0405	23.0281	23.004	22.7123	NA	NA	NA	NA	NA	NA	NA	NA	NA	NA	NA	NA	NA	NA	NA	NA	NA	NA	NA	NA	NA	NA	NA	NA	NA	NA	NA	NA	NA	NA	NA	NA
B1AK87;B1AK88	29.5264	29.2776	29.3885	28.956	28.8099	28.9308	28.7384	28.9462	28.692	28.8019	29.1297	29.0961	28.8799	29.0688	28.6369	28.9837	29.1737	28.8439	29.3234	29.2468	29.4979	28.3493	28.8316	29.1899	29.9172	28.8656	28.5259	28.9209	29.0498	28.5513	28.4886	28.5333	29.2195	28.4076	28.5566	29.1366	28.7374	29.1685	29.1881	28.7913	29.0387	28.2821	28.0867	27.8685	27.823	28.8387	28.644	28.0189	28.3761
B1ALA9;P60891;A0A2R8Y7H4	26.8959	27.3201	27.0868	27.2844	27.1643	26.8983	26.7347	26.8079	27.656	27.3236	27.2344	26.798	27.1733	27.1809	26.776	27.4073	27.6231	26.6301	29.2276	29.6477	26.854	28.557	27.3831	27.011	28.4123	27.9229	28.8366	28.0741	26.7139	26.3096	27.3408	28.545	26.6475	27.4262	26.716	27.1624	26.6147	27.0969	27.0434	27.0648	27.5793	27.3459	26.8389	27.247	28.3098	27.3259	27.7015	27.7397	27.2722
B1ALD9	27.902	26.8022	28.1502	28.5938	29.6319	27.9087	28.5421	29.3914	28.418	29.2635	29.3057	30.2615	29.0465	30.0261	28.8556	28.8809	28.9092	29.7317	28.5738	29.9507	30.6752	30.3985	32.2163	31.5148	29.7539	32.014	31.0534	31.2266	31.5817	32.582	30.5229	28.8399	28.7573	28.1932	28.2895	29.0027	29.2669	27.6531	28.8226	29.2691	27.8278	28.5845	29.0344	29.7893	28.5693	29.3317	29.998	29.6102	29.2652
B1ALY0;C9JA33;Q8IXS6;C9JZH4	26.2526	25.9594	26.2254	25.3403	25.2229	25.3264	26.324	26.0763	24.7446	26.4776	26.8889	26.7315	28.1101	26.1463	26.383	26.6319	26.3644	26.1701	NA	NA	25.6082	26.0928	25.8384	25.2043	23.5818	26.2283	26.3522	NA	27.4729	25.888	23.7932	24.9059	26.5709	26.0233	26.6547	24.2752	24.5991	25.5683	27.1294	25.9243	25.1893	23.4688	26.3644	NA	25.1172	25.7946	24.2604	24.8475	NA
B3KS98;O15372;A0A087WZK9	24.9777	24.5318	25.3701	25.1586	24.8215	25.1766	25.2448	25.0397	25.2301	24.8945	24.9189	24.715	25.2627	24.9452	25.1934	25.1432	25.1007	24.8138	NA	NA	24.7748	25.1759	24.9344	23.1574	25.0732	25.3329	25.108	NA	24.7518	24.99	24.1311	NA	25.2438	24.8811	24.5478	NA	24.8603	NA	24.9408	25.0047	25.5267	25.0314	25.1386	24.8113	NA	25.2549	24.6908	24.9361	25.112
B3KSI3;O15382;M0QZ10;M0QXF9;M0QZP4	24.6421	25.2304	25.3187	24.9874	24.6092	24.1311	24.3393	24.7441	NA	NA	25.4397	24.8523	NA	25.0052	25.7103	25.6894	25.583	24.569	24.8624	NA	25.031	NA	NA	25.1031	NA	24.6159	24.1918	NA	NA	24.7725	24.8986	25.0713	NA	NA	NA	NA	NA	NA	24.2202	NA	NA	24.9157	NA	25.4987	24.5429	24.7237	25.7923	NA	25.265
B3KW70;F5GYX4;H0YG03;Q13361;H0YGS3;F5H7Z2;F5H2W4	27.5692	NA	25.6929	26.9769	28.2157	26.191	25.0578	28.8323	28.0207	28.1306	27.7458	24.9311	26.2245	27.7316	26.0169	29.0896	28.9208	26.6054	28.3845	25.2431	27.2474	NA	27.4313	27.284	27.1151	26.9304	27.2954	26.794	27.2064	24.2978	26.7143	23.3887	23.1114	24.6882	24.4298	24.9403	26.3042	NA	NA	24.1702	25.3654	23.4768	24.891	NA	25.4534	23.1844	23.6153	NA	NA
B3KY94;O14735	23.0645	25.0662	25.0313	25.1465	25.6696	24.7295	23.4608	25.8647	25.0037	24.8127	24.7452	24.8036	24.3056	25.1619	24.3889	24.1372	24.5351	24.4097	NA	24.1166	24.7726	NA	NA	25.2752	24.6814	23.1487	23.3989	24.9012	23.1113	23.8808	23.1947	24.4335	24.8398	NA	25.1628	24.4769	24.7335	24.8343	25.035	25.1785	25.9518	24.0415	23.5142	25.1604	24.1859	23.908	24.291	NA	25.0211
B4DDJ5;P21757	25.5671	25.2708	24.6822	25.0731	NA	24.6503	24.4776	NA	NA	24.0773	NA	24.2663	NA	24.8056	24.5617	NA	23.8453	24.7729	NA	24.752	24.6627	24.0541	24.7827	25.0871	NA	NA	NA	NA	NA	25.674	24.4633	NA	NA	NA	NA	NA	NA	NA	NA	NA	NA	NA	NA	NA	NA	NA	NA	NA	NA
B4DJV2;O75390;A0A0C4DGI3	30.0472	30.3133	30.4834	30.551	30.3865	30.4946	30.0866	30.2446	30.4362	30.798	30.8068	30.4451	31.1088	30.2632	31.1304	30.8856	30.8691	30.2421	29.9885	29.9016	30.3794	30.6995	30.1853	30.5022	30.8115	31.1697	30.7624	29.7613	31.1617	30.6011	31.244	30.1622	30.3693	29.7659	29.9408	30.3648	30.2952	30.2541	30.2068	30.439	29.5941	30.6186	29.8599	30.3669	31.2059	30.5488	31.0528	30.5549	30.8588
B4DKY1;P49589	27.3156	26.8449	27.3541	25.699	26.5372	25.7735	27.4281	27.2346	27.2141	27.9824	27.73	27.8107	28.015	27.7503	27.8481	27.1308	27.468	27.4825	27.4071	27.0165	27.1078	27.2449	26.9338	27.6172	25.9489	27.5423	27.3104	24.967	27.5387	26.9837	27.3033	27.3803	26.7924	26.1095	26.7039	25.096	26.0166	25.1857	27.5345	27.0091	26.8368	26.2213	26.7135	25.7219	26.2686	26.2833	26.5376	26.5106	25.4702
B4DLN1	25.4804	25.0969	26.0016	25.579	25.9687	25.7804	25.7797	25.7336	26.6938	25.0556	25.3358	25.3175	25.989	25.4566	25.9833	25.9521	25.6992	26.0345	24.8561	NA	26.2255	24.8194	25.2601	26.1064	NA	26.3912	25.6658	NA	26.8215	25.9636	25.7134	25.8895	25.3016	24.8135	23.9511	25.2537	24.8505	25.0642	25.1588	24.463	25.451	24.3993	NA	NA	24.4887	25.3736	25.4211	25.1403	25.3246
B4DR61;P61619;H7C1Q9;C9JXC6;H7C069;A6NK38;F2Z2C7;A6NIF9;C9JJV4;F8W776;Q8TC24;Q9H9S3	26.862	26.7499	26.8679	27.1713	27.0226	26.673	26.7739	26.6799	26.1525	24.4257	25.1225	25.3724	25.8386	NA	24.3622	25.1284	25.4991	NA	NA	NA	NA	NA	NA	NA	NA	NA	NA	NA	NA	NA	NA	NA	25.7808	25.8851	25.2298	25.5882	26.25	26.6178	25.3634	25.6659	NA	25.8935	NA	26.2844	25.6256	25.4334	25.842	25.4228	25.7462
B4DR80;Q9Y6E0;H0Y630;Q5JV98	NA	NA	24.3799	NA	24.6155	NA	24.6432	24.5558	23.5489	24.4665	23.766	24.83	24.6435	23.6951	24.2222	25.1368	24.5867	24.7907	24.0316	24.1441	24.6128	24.6495	24.1889	NA	NA	23.8555	24.7469	NA	23.4156	24.3553	23.6864	NA	24.8923	24.6071	NA	24.8805	24.5866	NA	NA	NA	24.637	23.3796	24.4076	23.8486	NA	NA	NA	24.6376	NA
B4DWR3;P61758	25.5884	25.4837	25.4767	25.3616	24.9721	25.3753	25.4604	24.8779	25.1351	25.0836	25.007	24.9481	25.3164	25.2527	25.1417	25.1236	25.3575	NA	NA	NA	NA	NA	NA	NA	NA	NA	NA	NA	NA	NA	NA	NA	25.354	25.6551	NA	NA	NA	NA	24.0162	25.1388	24.879	NA	NA	NA	NA	NA	NA	NA	NA
B4DY09;Q12905	27.138	27.1996	26.5829	27.1067	27.2274	27.6371	27.0862	27.2824	27.257	27.0377	27.1924	27.2063	27.211	27.2881	26.9817	27.2347	27.0086	27.0649	27.1048	27.1373	27.1756	27.3609	27.7017	27.5351	27.6806	27.1997	27.2392	27.1542	26.9934	27.8425	28.0145	27.1136	27.2191	27.0504	27.0531	27.5227	26.8045	27.3266	27.1935	26.9204	26.4897	27.4201	27.2457	28.1378	27.0528	27.3979	27.4342	27.8698	27.9642
B4E0K5;Q16539;E7EX54	NA	23.8353	22.9929	23.0879	22.8077	NA	23.5768	NA	23.4351	24.0157	NA	NA	NA	NA	23.3258	23.5707	NA	24.1615	23.4597	NA	23.745	23.3286	23.9943	23.5319	23.3378	NA	NA	NA	23.5131	24.0599	NA	NA	23.2875	NA	NA	NA	NA	23.5567	23.5898	23.71	23.5388	23.3558	23.2195	23.7064	23.7036	23.3343	23.0369	23.3611	NA
B4E1G1;Q9BUN8	25.6554	NA	NA	25.3338	25.7643	NA	24.742	25.3646	NA	24.805	25.0941	25.2217	25.2648	24.7157	25.191	25.0309	24.9911	NA	NA	NA	NA	NA	NA	NA	NA	NA	NA	NA	NA	NA	NA	NA	NA	NA	NA	NA	NA	NA	NA	NA	NA	NA	NA	NA	NA	NA	NA	NA	NA
B4E1Z4;P00751	31.9326	32.7567	31.4867	32.5712	31.0577	31.6208	30.5541	31.0427	30.9964	31.719	31.9617	30.6493	31.9146	31.098	31.2709	31.9648	32.6348	30.5357	33.0578	32.7004	31.1835	31.3803	30.6813	30.6238	31.8189	32.1813	32.1874	31.8294	29.8475	29.9373	30.0409	32.3717	31.6468	32.4021	31.1945	32.5493	31.5274	31.9746	30.559	31.5575	31.5507	31.6721	32.3595	31.5276	32.4262	31.3863	31.4312	32.1967	32.0706
B5MBZ0;Q9HC35	25.1321	25.0395	24.5336	24.7999	24.2869	24.9561	NA	NA	NA	NA	NA	NA	NA	NA	NA	NA	NA	NA	NA	NA	NA	NA	NA	NA	NA	NA	NA	NA	NA	NA	NA	NA	24.253	25.3163	NA	NA	24.6155	24.8221	24.3089	NA	NA	24.2837	NA	24.8186	NA	NA	NA	24.1155	24.463
B5MCE7;B5MCH7;E7ETZ4;Q9Y6E2;E9PFD4	22.9894	NA	23.0268	NA	22.8811	23.209	23.1212	NA	NA	23.0568	22.8253	NA	22.8043	22.9962	22.9801	22.8679	NA	23.1811	NA	NA	23.3419	23.3817	23.679	NA	NA	23.6074	23.4097	NA	23.7488	23.5382	23.4763	NA	NA	NA	NA	NA	NA	NA	NA	NA	NA	NA	NA	NA	NA	NA	NA	NA	NA
B5MDF5;P62826;J3KQE5;F5H018	29.6967	29.5257	29.526	29.433	29.4969	29.6785	29.9039	29.4343	30.0832	29.8099	29.5543	29.5574	29.7688	29.6065	29.4968	29.6158	30.0043	29.8586	31.4093	31.2618	29.3863	30.3209	30.1566	30.0077	31.3371	30.2166	30.4875	29.6324	29.2044	29.6136	29.3073	29.8914	29.1809	29.0498	28.303	28.8531	28.8711	29.7983	30.3563	29.7715	30.4459	29.6715	29.3524	29.4885	29.954	29.6945	29.3761	28.3056	29.6794
B7WPE2;Q32P44;G3V195;H0Y3M3;G3V1D0	25.0423	25.5747	24.6682	25.786	25.3688	25.6981	25.3927	24.685	NA	NA	25.107	24.8058	24.7411	NA	24.3613	24.7824	NA	23.8448	NA	24.7128	24.3645	24.0383	NA	NA	23.6449	25.1565	24.1978	NA	24.2484	25.0676	24.7524	24.8616	25.1152	25.0552	NA	23.6613	25.1744	25.2697	NA	25.0532	25.1462	24.5781	NA	NA	25.0125	24.4089	24.4111	25.107	24.6128
B7Z4M1	26.397	26.3262	26.0672	26.5748	24.0647	24.576	NA	NA	24.4708	25.3812	26.364	25.6585	24.2496	24.1269	25.219	25.6245	24.9055	25.5914	24.7611	25.3002	25.9234	25.2363	24.9758	25.3102	26.1712	24.5436	25.2031	NA	23.964	NA	25.6101	NA	NA	NA	NA	25.9818	NA	NA	NA	NA	NA	25.7598	NA	25.0444	25.3903	NA	25.3635	NA	25.0021
B7ZC38;Q9NR46;B7ZC39	25.945	26.2774	25.5985	25.6989	25.8677	25.3342	25.3179	25.9083	26.1619	25.7199	25.2269	25.4285	25.6449	25.6524	25.8979	25.8927	25.5637	25.1872	26.2377	26.1152	25.1148	25.5463	25.5288	25.3846	25.4519	25.7263	26.0412	NA	25.6894	25.4919	25.8238	NA	26.5669	25.3426	26.3179	25.8891	27.2479	NA	25.4056	26.8634	26.905	25.819	25.383	26.0137	25.613	25.7416	25.6496	26.0079	26.1307
B8ZZF8;Q9Y4Y9	NA	24.7629	NA	NA	NA	NA	24.4045	23.8842	NA	25.1435	25.9618	25.7365	25.4192	NA	25.8751	25.1524	24.7688	24.3243	NA	NA	25.5601	NA	26.1808	NA	NA	NA	NA	25.1931	24.876	25.0198	25.3736	25.2878	NA	25.8717	24.2846	24.4594	24.5572	24.1754	NA	25.4807	25.9434	25.3235	25.4082	26.0105	NA	25.1568	24.9333	24.4843	24.3102
B8ZZG1;Q9NZW5;C9J4Q3	NA	NA	25.4867	NA	24.7613	25.0995	24.5416	NA	NA	24.7275	24.4043	24.9548	24.2618	25.4995	24.8869	24.5677	NA	NA	NA	NA	24.0946	24.556	NA	NA	NA	24.711	24.4107	NA	24.6879	NA	24.3944	24.4056	24.9907	NA	25.0321	NA	24.9436	NA	NA	24.8024	24.9233	24.112	NA	NA	NA	NA	23.661	NA	NA
B8ZZQ6;P06454;B8ZZA1;B8ZZW7;H7C2N1	NA	NA	NA	NA	NA	NA	NA	NA	NA	NA	NA	NA	NA	NA	NA	NA	NA	25.3353	25.6283	25.4447	25.9639	26.0866	27.1716	NA	NA	26.1544	25.8192	NA	27.1092	NA	25.9817	NA	NA	NA	NA	NA	NA	NA	NA	NA	NA	NA	NA	NA	NA	NA	NA	NA	NA
C9IYK6;C9JTE9;Q9UHQ4;C9JGJ9;F8WB99;H7C5E2	23.7506	NA	NA	NA	24.8943	NA	NA	NA	25.0457	24.0126	24.0818	NA	24.1641	NA	21.9263	24.6496	NA	NA	NA	NA	NA	NA	NA	NA	NA	NA	NA	NA	NA	NA	NA	NA	NA	NA	NA	NA	NA	NA	NA	NA	NA	NA	NA	NA	NA	NA	NA	NA	NA
C9J050;C9JEJ2;P49585;H7C1T3;C9J2E1;H7BZN1	24.9454	25.6272	25.4365	24.5281	24.6508	25.1275	24.7094	25.0412	24.9147	NA	25.2359	25.2062	NA	24.3768	25.7585	24.3532	24.3563	25.8275	24.5797	NA	24.2084	NA	25.483	25.0733	NA	23.4979	25.0587	NA	25.9367	25.082	25.1071	NA	25.2112	NA	24.764	25.047	NA	25.3288	NA	NA	25.3266	25.5915	24.6978	25.0029	24.3716	24.7106	24.8518	23.9019	24.7994
C9J0J7;G5E9Q6	27.4371	27.2676	27.3648	27.1901	27.1992	26.9102	27.0791	26.851	26.4071	28.0006	27.6297	26.9287	27.383	27.7343	26.7862	26.4751	25.8064	27.0977	NA	NA	26.7519	26.9877	26.3549	27.0621	26.288	27.2307	25.9824	25.8647	27.5679	26.7881	26.6295	26.1047	27.1794	26.7886	28.2789	27.3643	27.9042	27.2096	27.7066	28.1761	26.5034	26.9131	27.2711	27.3249	26.0051	27.1954	26.3078	26.2067	26.6465
C9J0K6;P30626	28.9636	29.3161	28.5609	29.0928	28.7521	29.1556	29.1816	28.7456	29.2554	28.7338	28.7093	28.7491	28.8276	29.0665	28.9281	29.0523	28.8326	29.1838	30.2447	29.4618	28.8255	29.5586	28.7208	28.9858	29.358	28.8276	29.3286	29.1213	28.5649	28.5216	29.2146	28.9036	29.5077	29.8879	29.6097	29.1336	28.6218	29.0371	29.7499	29.478	30.5268	28.479	28.9255	28.4435	28.8979	28.8369	28.3277	26.8162	28.8234
C9J1Z8;P84085	NA	NA	NA	23.895	24.545	24.9397	NA	25.1662	NA	26.0195	25.7676	23.9503	25.4017	25.106	25.0467	25.7555	25.6323	NA	NA	NA	NA	NA	NA	NA	NA	NA	NA	NA	NA	NA	NA	NA	NA	NA	NA	NA	NA	NA	NA	NA	NA	NA	NA	NA	NA	NA	NA	NA	NA
C9J2H1;Q86UX2;G5E9D8;A0A096LP62	29.0509	27.3323	28.4144	28.3393	27.3675	27.9318	28.2167	27.5537	27.6141	27.558	27.7061	27.706	27.8429	27.6456	27.0424	27.5117	27.2656	28.5238	27.9385	27.7571	28.4533	27.4531	27.9987	28.3824	27.3005	28.593	28.3594	28.3825	27.5813	28.7219	27.7454	27.8118	27.2526	27.744	28.31	27.5821	27.6029	28.1123	28.4833	27.2163	27.5001	27.2756	26.984	26.6862	25.9399	26.6816	26.7411	26.0467	25.7814
C9J2Y9;P30876;C9J4M6;A0A1W2PPT5	23.2148	NA	23.3709	23.2486	23.1779	NA	24.2508	NA	NA	23.2177	23.2065	23.4046	22.9481	23.0762	22.877	NA	NA	24.5186	NA	NA	23.7425	23.6365	23.6059	23.5043	23.7138	NA	NA	NA	23.0246	23.2498	NA	NA	23.6153	23.8	23.4572	23.3852	23.6844	NA	23.1246	23.4468	23.8946	23.8972	23.5558	24.0256	23.3125	23.2487	23.3178	23.5157	23.9517
C9J3L8;C9J5W0;A0A3B3IRT8;E9PAL7;C9IZQ1;P43307	24.8285	26.9369	24.5056	25.0951	25.5694	24.9625	26.2439	25.5788	25.4634	25.6749	26.2717	26.2321	26.2909	25.7522	26.4746	26.0086	25.3997	24.9772	25.7083	NA	25.0894	NA	27.309	26.2267	NA	24.876	26.0751	25.1224	25.5991	27.1303	25.3133	25.9394	24.7285	23.9156	25.4625	25.5236	NA	NA	26.1876	NA	NA	26.4141	26.1038	26.8404	25.4547	25.2904	26.3171	26.0543	25.8304
C9J5N1;Q9BTE6	NA	NA	NA	26.9988	26.3644	26.9026	26.278	26.8067	26.8049	26.6376	NA	25.5434	26.1663	27.3874	26.3322	26.6443	NA	27.6096	28.8483	28.6529	27.4651	27.2311	27.9961	26.9423	28.0313	27.4889	27.3029	NA	27.4375	27.0678	NA	NA	NA	NA	NA	NA	NA	26.982	26.8959	NA	27.6941	26.9638	27.0126	27.5399	27.7278	26.7566	26.978	26.9635	NA
C9J695;Q6ICL3;C9JDT9;A0A0A0MSI5	25.3154	NA	24.5722	24.0962	25.4917	24.2832	24.1094	24.5621	24.8452	24.9769	24.4458	24.5035	24.5844	23.3768	NA	23.3297	25.0142	23.9163	27.1347	26.9955	24.6209	NA	24.4392	24.6123	26.4183	25.9636	26.2848	25.8763	24.2536	NA	25.4567	26.6374	NA	NA	NA	NA	NA	NA	NA	NA	NA	24.8733	24.2939	NA	26.0823	25.1814	NA	NA	24.472
C9J9K3;A0A0C4DG17;P08865;F8WD59	28.7254	28.5826	28.4385	28.494	28.8676	28.5365	28.7608	28.7815	28.8835	28.9294	28.9652	29.0856	28.8756	29.1846	28.9191	29.0715	28.753	28.9675	28.4212	27.9079	29.0609	28.8017	29.5143	29.0574	29.1022	28.4499	28.1618	28.3303	28.9535	29.2472	28.8406	29.0691	28.5563	28.9036	28.5449	28.5153	27.6674	28.3489	29.0191	28.2146	27.932	28.3564	28.9128	28.7475	28.3849	28.1848	27.7223	28.8022	28.4526
C9JAW5;C9JNU6;Q9Y241	24.4709	NA	NA	24.9869	24.3761	25.2841	23.8429	23.9147	26.2643	23.7282	24.4701	NA	NA	24.663	NA	24.8573	NA	25.412	24.2843	NA	25.0902	26.5628	26.4202	25.8014	NA	24.4256	25.0325	NA	26.3133	22.9654	22.621	NA	22.8718	24.1217	24.9761	24.2288	25.1171	24.2573	24.0771	NA	25.1917	23.897	24.0199	23.5868	25.6786	24.0749	24.1348	23.4588	22.8195
C9JBI3;P78330	24.0154	NA	24.213	23.961	23.4934	24.0526	24.3792	NA	NA	23.1362	23.6766	23.5166	23.2189	24.1706	NA	23.8882	NA	NA	NA	NA	NA	NA	NA	NA	NA	NA	NA	NA	NA	NA	NA	NA	NA	NA	NA	NA	NA	NA	NA	NA	NA	NA	NA	NA	NA	NA	NA	NA	NA
C9JE12;C9JCW7;Q9BVT8	24.6022	NA	NA	24.4968	24.1784	NA	24.1356	24.5251	NA	NA	NA	NA	NA	NA	24.2249	NA	NA	NA	NA	NA	NA	NA	NA	NA	NA	NA	NA	NA	NA	NA	NA	NA	NA	NA	NA	NA	NA	NA	NA	NA	NA	NA	NA	NA	NA	NA	NA	NA	NA
C9JEN3;C9IYT2;F8WDY4;C9IZ27;C9JW19;C9JWV9;B4DUD2;Q969X1	25.6873	25.3737	25.3922	25.5368	25.2551	25.4243	24.5322	NA	NA	24.2728	24.4877	24.8256	24.9374	NA	NA	24.3444	24.9765	NA	NA	NA	NA	NA	NA	NA	NA	NA	NA	NA	NA	NA	NA	NA	25.8299	26.3275	NA	25.5307	26.3216	26.0414	NA	25.004	25.2052	26.107	NA	25.1071	NA	25.6178	25.7739	25.2377	NA
C9JF17;P05090;C9JX71	29.1459	29.0545	29.4669	29.3725	29.1484	28.5804	27.5346	28.0838	28.7776	29.2014	29.6473	28.5783	29.7322	28.9076	28.8648	28.828	29.5534	29.1766	30.5091	30.3628	29.3838	29.5403	28.1138	29.9714	30.675	29.8788	30.4521	30.439	29.5636	28.3465	28.2514	30.2752	29.7478	29.6921	29.3547	29.7558	30.057	29.3865	28.531	29.3054	29.5745	29.2051	29.5132	28.2299	29.8989	29.9311	29.0382	28.7152	28.7965
C9JFE4;Q13098;A0A096LP07;A0A096LPJ3;A8K070	25.6059	26.4036	26.0368	26.4079	25.1376	26.2819	25.9778	26.1963	26.4455	26.6329	26.1872	26.2589	26.0206	26.7189	25.779	25.943	26.0951	26.136	27.0033	26.8377	25.2206	25.8768	25.2929	25.6706	26.5622	26.5713	26.0713	26.6857	26.0185	26.22	25.2984	NA	25.784	NA	NA	24.6834	25.659	25.1988	25.7981	25.2339	25.5762	25.2487	25.0277	25.4672	25.8891	25.5443	26.0635	25.9655	25.2487
C9JFR7;P99999	29.5794	29.9481	29.8095	29.8394	29.9988	29.7211	29.9938	29.8265	29.8334	30.0589	29.6822	29.6434	30.0006	29.3624	30.442	29.9798	29.4162	29.7528	24.7387	27.5869	30.2386	28.9006	29.3743	30.2145	29.1178	29.5731	28.6908	29.4014	30.3041	29.5016	29.5091	28.7809	29.6005	29.411	29.8651	29.459	30.6311	29.5828	29.9103	30.3893	29.809	29.4161	29.4852	29.5555	29.027	29.0273	29.6828	29.7699	29.3276
C9JIF9;P13798;H7C1U0;H7C393	28.7391	28.7914	28.0867	28.5308	28.5606	28.9389	28.241	27.6413	28.5882	28.688	28.2836	28.1533	28.5296	28.9962	27.7874	27.6133	28.7187	28.0521	30.5167	30.3966	27.8605	29.2164	28.3588	28.6692	29.314	29.7524	29.8343	30.1976	27.759	28.1581	28.5982	29.8956	28.6919	28.6856	27.9109	27.5576	28.6777	28.9007	28.468	28.1557	29.4162	28.7686	28.6179	28.4864	29.4006	28.9037	29.0451	29.0095	28.8395
C9JIZ6;P07602;Q5BJH1	29.9985	29.3661	30.0903	29.5983	28.8483	27.9315	28.3249	27.8676	25.8181	29.0977	28.7061	28.4706	27.951	28.4334	28.8514	28.4708	27.5351	29.8352	27.0807	25.2899	29.512	26.5595	28.5585	28.962	27.3348	27.7299	26.5865	28.6253	29.6956	29.0588	27.5718	27.5313	28.1826	28.0431	28.3853	28.2849	29.4812	27.0638	28.9146	28.4081	27.7265	26.9356	27.8443	26.9791	26.3567	27.2349	27.1436	26.9602	27.1206
C9JJT5;G3V325;C9JU26	24.5586	24.8109	24.8925	24.6336	24.6996	NA	25.5588	28.5826	NA	24.2868	23.9596	24.7825	NA	23.776	24.6276	23.7676	24.3094	NA	NA	NA	NA	NA	NA	NA	NA	NA	NA	NA	NA	NA	NA	NA	NA	NA	25.1959	24.9608	NA	NA	NA	25.8735	NA	25.4354	NA	NA	NA	25.3139	25.4045	25.3514	25.1291
C9JKI3	NA	26.7639	NA	27.7142	26.8101	27.5455	27.3616	NA	27.5385	27.4239	NA	27.3523	27.2464	26.5224	27.0786	NA	27.1613	25.7287	NA	26.1346	26.5162	27.637	27.7034	27.7747	27.2413	26.6902	NA	26.6179	27.8999	26.576	27.5016	NA	29.5239	29.8325	27.7612	28.8874	27.4187	29.1595	28.9494	27.4416	28.6178	26.5026	27.7986	26.4307	26.328	26.7016	26.2873	28.0779	NA
C9JP16;O75718	NA	NA	NA	NA	23.9237	23.9461	23.698	NA	23.4093	22.8522	23.3263	23.313	23.0177	23.9011	22.6884	22.9831	23.2772	24.0211	24.3203	24.3005	24.0283	23.7132	23.283	23.3395	NA	23.996	23.9506	24.36	NA	24.8085	NA	NA	NA	NA	NA	NA	NA	NA	NA	NA	NA	NA	NA	NA	NA	NA	NA	NA	NA
C9JQ41;H7C525;Q4VC31	NA	24.5918	24.552	NA	24.3667	24.8993	24.7617	24.1154	NA	NA	24.2842	NA	24.5235	NA	24.0798	24.1068	NA	NA	NA	NA	NA	NA	NA	NA	NA	NA	NA	NA	NA	NA	NA	NA	NA	NA	NA	NA	NA	NA	NA	NA	NA	NA	NA	NA	NA	NA	NA	NA	NA
C9JRD2;C9JXB9;P25686;C9J1G2;E7ETU0;C9JX00	24.3942	NA	24.0166	24.2054	24.0542	NA	24.2058	NA	23.9627	NA	24.3251	23.8241	23.8075	23.8597	23.7752	24.1003	24.1928	NA	NA	NA	NA	NA	NA	NA	NA	NA	NA	NA	NA	NA	NA	NA	NA	NA	NA	NA	NA	NA	NA	NA	NA	NA	NA	NA	NA	NA	NA	NA	NA
C9JRZ6;Q9NX63;F8WAR4;A0A286YEX5	27.469	27.6285	27.9133	27.3681	27.3629	27.3849	28.1407	27.386	28.0784	27.4534	27.6694	27.7129	28.3366	27.5386	28.1284	27.7616	27.7692	27.677	26.7927	26.4554	27.6272	27.5865	26.8092	27.4543	27.4385	27.7046	27.588	26.5224	28.2766	27.2501	27.6361	26.8307	27.096	25.8876	25.1049	27.1404	NA	26.7227	26.9475	NA	26.4104	27.8569	27.7824	26.4869	27.8597	27.7443	27.7114	27.3691	27.4577
C9JVE2;Q96GG9;C9J8R4;C9JRU6;C9J0B2;C9JUW4	NA	NA	NA	24.3129	24.0941	24.7358	NA	24.4998	25.0637	NA	23.6142	23.0458	23.3336	NA	24.4449	24.8247	NA	24.1904	25.5768	26.3993	24.5026	24.3299	NA	23.863	24.9882	24.261	24.4298	NA	24.1241	23.8771	23.945	NA	NA	NA	NA	NA	NA	NA	NA	NA	NA	24.0799	NA	24.2592	23.9398	24.6492	23.1598	NA	NA
C9JXB8;C9JNW5;P83731	25.7907	26.3813	25.4017	26.0525	25.7242	24.8082	25.6318	25.7649	NA	25.7526	26.2625	26.1156	25.9105	25.7744	26.1783	25.8809	25.6625	25.9193	25.2732	NA	25.0302	NA	26.7261	25.5431	NA	24.7026	25.7952	NA	25.801	26.5389	NA	NA	26.4783	25.271	NA	26.5281	NA	NA	NA	NA	26.5815	26.5665	26.3648	27.1424	NA	25.4559	27.3994	26.5327	26.8147
C9JXI5;Q66K66	27.9583	27.5802	27.532	27.0817	26.2306	27.2709	26.7421	26.535	25.8712	27.2332	NA	NA	NA	NA	26.6487	27.5487	27.6026	NA	28.437	29.12	NA	28.6458	28.3171	29.1348	NA	28.2277	NA	NA	NA	26.6786	NA	NA	28.3434	29.6942	29.1215	28.6078	28.8716	28.2057	27.1989	27.0742	28.4149	26.5074	27.5585	27.5139	27.304	26.4852	25.6443	27.2251	29.1299
C9JY28;C9JRX8;F5H189;Q9HD34;C9J799	NA	24.7089	24.7642	NA	24.1434	24.3167	24.2748	NA	NA	24.1054	24.0816	24.5485	NA	NA	24.289	24.5342	NA	NA	NA	NA	NA	NA	NA	NA	NA	NA	NA	NA	NA	NA	NA	NA	NA	NA	NA	NA	NA	NA	NA	NA	NA	NA	NA	NA	NA	NA	NA	NA	NA
C9JYN0	26.9432	26.8281	26.567	27.325	27.3044	27.9378	26.9299	27.286	27.3428	27.2688	27.8324	27.0984	27.2108	27.161	27.4716	27.6282	27.7187	26.321	NA	NA	26.758	NA	26.1845	27.3094	27.3745	26.6997	26.8794	27.5063	26.19	26.6928	27.7077	27.4219	27.0632	26.1129	26.7005	26.9291	26.663	27.1361	NA	NA	26.6501	26.533	26.973	26.5784	26.6969	26.4972	27.5345	27.2182	26.4611
C9JYY6;Q92823;F8W775;A0A087X2B3	NA	NA	NA	NA	NA	NA	NA	NA	NA	NA	NA	NA	NA	NA	NA	NA	NA	25.1984	NA	24.4335	24.6672	24.5643	24.9213	24.8982	NA	24.8896	NA	NA	25.0495	24.6191	24.1857	NA	NA	NA	NA	NA	NA	NA	NA	NA	NA	NA	NA	NA	NA	NA	NA	NA	NA
C9JZR2;O60716	23.7616	25.3447	24.523	25.4878	26.0645	25.35	25.6205	25.5773	26.0641	25.9312	25.5272	25.2515	25.8345	26.9397	25.9931	25.689	26.1481	25.3515	24.7084	24.4692	24.9973	25.1006	25.0819	24.5876	23.38	26.516	26.0156	24.7059	25.9361	26.7201	25.7355	NA	25.0656	24.0326	25.7616	25.4305	25.4459	24.5218	25.5309	25.1934	23.6965	24.7565	25.0368	25.3674	24.2271	24.5108	24.5828	23.1106	25.6996
D3DSM0	24.438	24.4403	22.4726	23.6354	24.087	23.5626	24.0626	23.5535	NA	24.0337	23.1057	23.8665	23.5889	24.7098	24.083	23.7243	23.9334	NA	NA	NA	NA	NA	NA	NA	NA	NA	NA	NA	NA	NA	NA	NA	NA	NA	NA	NA	NA	NA	NA	NA	NA	NA	NA	NA	NA	NA	NA	NA	NA
D3DX19;O00501	25.6211	NA	NA	25.3404	24.7128	24.7895	24.5312	24.8804	24.5025	23.7958	NA	NA	NA	NA	NA	NA	NA	NA	NA	NA	NA	NA	NA	NA	NA	NA	NA	NA	NA	NA	NA	NA	NA	NA	NA	NA	NA	NA	NA	NA	NA	NA	NA	NA	NA	NA	NA	NA	NA
D3YTB1;F8W727;P62910	26.208	26.2413	26.0952	25.9632	25.8702	26.3588	25.9229	25.5169	NA	24.4064	26.0234	25.8223	25.6031	25.2472	26.1387	25.5393	25.7306	NA	NA	NA	NA	NA	NA	NA	NA	NA	NA	NA	NA	NA	NA	NA	25.8822	NA	24.2002	24.289	27.1303	27.0967	25.1253	NA	26.3781	27.0782	25.8874	25.8467	24.5478	26.0766	24.8652	24.6981	24.7119
D3YTG3;Q7Z7G0;H0Y897	26.4134	28.0758	26.8907	26.5251	27.2136	26.9554	25.741	27.6737	27.4721	27.5627	27.3166	26.6583	27.3896	27.1216	26.16	28.1248	28.215	28.4836	29.9674	28.1106	29.4266	27.548	28.0663	28.651	28.5212	27.8072	28.6774	27.9511	27.8718	28.1119	28.7724	28.1313	27.0757	28.2875	26.8494	26.851	27.3245	25.9381	26.252	27.6798	27.5808	28.2338	28.6664	28.363	27.5082	27.8623	26.6262	28.0349	27.0153
D4Q8H0;Q9NYL2;C9J3F7	24.0424	23.5188	24.2444	24.0852	24.1377	24.168	23.8558	23.8516	24.4104	23.6568	23.6204	23.5438	22.5119	23.8955	23.8351	23.6901	23.6647	23.6511	NA	NA	23.4347	24.3009	NA	23.8335	NA	23.9768	24.4526	23.899	24.0844	23.3707	24.1058	NA	23.9343	23.9521	NA	NA	24.483	24.1141	23.7856	23.4754	24.502	23.6973	23.8576	24.2256	24.2044	23.5638	23.5363	24.2197	23.8215
D6R938;E9PBG7;E9PF82;Q13557	26.4634	26.1033	26.7074	25.9066	26.3727	26.6367	26.1028	26.3235	25.4898	26.6117	26.5748	26.4639	26.4038	26.352	26.4847	26.4189	26.1063	26.5224	26.132	26.391	26.5713	26.3876	27.1872	26.405	25.9054	25.4214	25.7126	NA	25.7949	26.7882	26.5486	NA	24.4815	25.9146	26.3215	26.1091	25.4491	25.7542	26.1428	24.8989	25.412	25.4385	26.1254	27.0471	26.0824	26.1954	26.4474	26.837	26.6515
D6R9I9;P61221	24.6732	23.7912	24.2116	23.6923	23.7733	23.2789	24.141	23.5513	NA	NA	23.5822	NA	NA	NA	NA	23.9624	NA	NA	NA	NA	NA	NA	NA	NA	NA	NA	NA	NA	NA	NA	NA	NA	NA	NA	NA	NA	NA	NA	NA	NA	NA	NA	NA	NA	NA	NA	NA	NA	NA
D6R9P3;D6RD18;D6RBZ0;Q99729	25.3187	24.7081	25.0333	25.1965	25.3391	24.8866	25.1071	25.049	24.8004	25.4967	24.8209	25.4326	25.2086	25.726	NA	25.7827	25.1823	25.1024	24.8884	NA	25.068	25.1608	25.3626	25.3332	24.4084	24.8225	24.862	24.2856	24.7857	25.359	25.5203	NA	25.3629	25.3765	25.1502	25.1765	24.8262	25.1191	25.2652	NA	NA	25.1384	25.0446	24.4164	24.5658	25.0021	25.4391	25.5157	25.0177
D6RAA6;P57088;H0Y8N0	24.3564	24.8347	24.3102	24.7972	24.2077	25.216	24.8552	24.5213	24.8671	24.7067	24.683	24.7532	24.9683	25.0049	24.6349	24.2852	24.5961	NA	NA	23.7407	24.7912	NA	24.2446	NA	24.3505	24.404	23.9408	NA	24.0332	25.5354	24.1929	NA	24.2929	24.3687	24.4704	24.4145	NA	NA	24.7828	24.8896	24.9978	23.9906	NA	24.1311	24.5021	24.0526	NA	NA	24.5243
D6RAN4;P32969;A0A2R8Y5Y7;E7ESE0;H0Y9R4	26.4269	26.6158	26.2296	26.6898	26.6207	26.7912	26.872	26.6111	26.8633	26.0369	26.5636	25.0829	26.3947	26.0273	26.4153	26.3862	26.2056	26.6125	26.1033	26.0731	NA	26.0006	NA	26.9351	26.8667	NA	26.9593	NA	26.3088	26.0959	26.7719	NA	26.5865	26.6694	26.3187	26.5069	26.3976	26.0023	NA	25.2919	NA	26.509	26.1856	26.6496	25.9537	NA	26.8493	26.5661	26.8641
D6RCD0;Q8NBQ5	25.9696	25.9042	25.0471	25.789	25.4652	25.6133	25.2111	25.4059	24.7234	25.5712	25.2972	25.6653	25.3715	25.34	25.6313	24.8371	25.2533	24.9855	NA	NA	25.3619	NA	24.8073	24.9805	25.2737	24.0377	24.6856	NA	24.615	24.5254	25.6232	25.4394	NA	25.1045	25.0227	25.4776	25.1981	25.469	25.5854	NA	24.69	25.2508	24.686	25.7646	NA	25.0412	25.4173	25.6588	25.5605
D6REB4;Q9H074	24.1989	24.2834	24.0151	NA	23.821	NA	NA	23.0927	24.1282	NA	23.7323	23.1582	24.2824	23.8838	23.6626	23.6979	23.8872	23.8579	NA	23.9771	22.7607	NA	23.8926	23.9221	24.2475	NA	NA	NA	23.1414	NA	NA	NA	NA	NA	NA	NA	NA	NA	NA	NA	NA	NA	NA	NA	NA	NA	NA	NA	NA
D6REX3;O94979;D6RHZ5;H7BXG7	28.3204	28.5753	28.2948	28.4065	28.1879	28.2823	28.736	28.2537	27.993	27.9791	27.5424	28.348	27.8274	28.443	28.1283	27.8111	28.0441	28.603	27.6076	27.8379	28.3484	28.1377	28.2957	28.3531	27.5008	27.9765	27.7505	27.6398	28.4914	28.5495	27.823	28.0092	27.8997	28.1319	28.0907	28.311	28.5063	28.6229	28.8218	28.7997	28.7245	27.5906	28.1946	27.9351	27.5417	28.2202	27.5156	27.7702	28.2125
D6RF35;P02774;D6RBJ7	31.3484	32.0812	31.5356	31.7941	31.753	31.5583	30.1724	31.0753	31.3593	31.5199	31.7056	31.2992	31.5671	31.4484	31.5081	32.5325	32.7765	30.012	33.26	32.4212	30.8917	31.2853	29.8416	31.06	32.7809	31.6843	31.7082	32.6993	30.3387	29.3856	30.1775	33.2839	30.7136	31.5113	31.0552	31.415	29.4352	30.9	30.0076	29.7008	30.3143	32.1057	32.5454	32.0862	32.2373	32.0484	31.7923	32.8739	32.6266
D6RGG3;Q99715;A0A087X0A8	30.1161	28.7777	30.6481	29.8996	29.7541	29.8548	29.386	28.8201	28.1776	27.7366	28.0472	29.1301	27.425	28.9126	27.5933	27.521	28.2013	28.3217	28.1801	28.312	28.4617	28.801	28.5534	28.3928	27.2108	28.4068	28.5443	30.4437	28.6413	29.4023	30.3564	28.4745	28.9207	28.9252	29.7922	29.764	30.2102	29.9008	28.7945	29.0856	28.6923	29.9025	29.1856	30.82	29.1475	29.8842	29.106	30.6959	30.8716
D6RGI3;D6RER5;Q9NVA2;D6RDU5	29.5709	30.2041	29.5815	29.3382	29.6194	29.935	29.1531	29.1845	29.241	29.3353	28.8625	29.63	29.276	29.4394	29.2322	29.2594	29.7705	29.2289	29.1471	29.2662	29.3991	29.5393	29.0532	29.5621	29.5239	29.8166	29.9109	30.685	29.6234	29.5299	29.9167	30.2348	29.8558	29.7635	29.1722	29.6155	30.1612	29.9887	29.3145	29.7911	29.8049	29.686	29.6848	29.9278	29.7271	30.0388	29.9873	29.7853	30.0277
D6RH17;Q8IUN7;P28332	NA	NA	NA	NA	NA	NA	NA	NA	NA	NA	NA	NA	NA	NA	NA	NA	NA	NA	NA	NA	NA	NA	NA	NA	NA	NA	NA	NA	NA	NA	NA	NA	NA	NA	NA	NA	NA	NA	NA	NA	NA	25.8461	26.0574	25.7372	26.0016	26.1206	26.2569	26.937	NA
E5RFP0;Q8WVJ2	25.1144	25.6469	NA	25.236	24.4687	24.4981	25.1705	24.9552	25.2546	25.5427	25.7037	25.6265	26.022	25.8645	25.0584	25.0281	25.4987	25.3703	25.1964	25.7458	25.1894	NA	NA	NA	25.378	25.2362	25.8152	24.8404	25.9407	25.5227	NA	NA	25.5794	NA	NA	NA	NA	25.7792	NA	25.6908	26.3447	24.6959	25.3619	25.7213	24.9485	25.4022	24.809	NA	25.3546
E5RHG8;Q15369;R4GMY8	27.7616	28.3713	28.815	28.0142	27.8496	27.5644	28.0868	28.0509	27.4006	28.3923	28.3384	28.4365	28.195	27.7191	28.6453	28.3989	27.76	28.1287	26.3021	NA	28.1629	27.3814	27.8651	28.2667	27.4446	27.6199	26.8244	27.1488	28.4562	28.0129	27.796	27.3259	28.4837	27.2725	28.9703	28.0687	28.7475	28.4747	28.9137	28.6937	28.5523	27.4621	28.3886	27.7801	27.1854	27.9339	27.89	27.8065	27.8441
E5RI99;P62888	27.239	28.0811	26.9095	27.2453	26.5724	27.0701	28.6031	27.3512	28.3308	27.7657	27.7986	27.7726	27.7204	27.8206	27.8097	27.9116	27.7378	27.5344	27.3624	27.4898	27.3688	26.436	28.2445	27.3638	27.7873	26.8174	27.3671	26.8079	28.807	28.5852	28.9654	26.273	28.8842	27.5671	27.8609	27.951	27.6146	27.4853	27.7814	27.2452	28.3989	28.8755	28.5831	27.4078	26.9482	28.091	28.5426	28.8352	28.3974
E5RIM3;Q9Y263;H0YBW4	24.7684	24.7027	24.8966	25.0695	24.2898	24.0936	24.1842	24.3197	NA	NA	NA	NA	NA	NA	24.4505	NA	NA	NA	NA	NA	NA	NA	NA	NA	NA	NA	NA	NA	NA	NA	NA	NA	NA	NA	NA	NA	NA	NA	NA	NA	NA	NA	NA	NA	NA	NA	NA	NA	NA
E5RIW3;E5RJD8;O75347;E5RHG6	26.6218	27.0169	26.7332	27.6718	27.1341	26.9917	26.8904	26.1429	27.2176	27.1895	27.2935	27.4061	27.7189	27.5659	26.8601	27.0101	27.4207	27.3049	27.5035	28.1076	27.2421	26.7338	27.4165	28.4302	27.5093	27.3263	27.6855	27.7933	26.8214	26.9727	26.8292	27.552	27.4251	27.5394	27.8692	27.605	27.5893	27.2822	27.81	26.9458	26.7493	26.8482	27.1685	26.978	27.5636	27.3288	26.5126	26.1847	26.266
E5RJR5;P63208;E7ERH2;F8W8N3	26.3791	26.2758	26.0873	26.5388	26.7147	27.033	26.5364	26.3572	26.8473	26.6299	26.6116	25.44	26.4922	26.4899	26.5169	25.8733	26.0714	26.2347	26.851	27.5793	25.8781	26.1312	25.7883	26.2059	26.439	26.5462	26.3791	26.4622	26.2061	25.1701	25.3658	26.8751	26.8403	26.7026	26.7719	26.1213	26.5203	NA	26.3015	NA	26.595	25.379	26.416	25.4975	25.5275	25.1554	25.3668	24.8679	25.8498
E7EM64;Q7L5N1	25.7084	26.269	25.4999	26.2243	25.9728	25.739	25.5291	25.7596	26.2566	25.7642	26.1509	25.4416	25.8655	25.8594	25.4366	25.9377	26.0804	25.4007	27.3443	27.1624	25.5162	26.0527	25.2946	26.2414	26.3013	26.3353	26.5515	25.5728	25.3141	25.5384	25.2628	25.9588	24.8726	25.7752	25.6181	26.2138	25.3405	25.305	25.9206	25.7356	26.1289	25.6574	25.5236	26.0067	25.9849	26.177	25.976	26.0695	26.0459
E7EMZ9;E9PBC6;O95359	NA	NA	NA	NA	NA	NA	22.8768	NA	NA	23.3965	24.0799	22.6183	24.7355	23.3996	NA	24.4385	23.7473	NA	NA	NA	NA	NA	NA	NA	NA	NA	NA	NA	NA	NA	NA	NA	NA	NA	NA	NA	NA	NA	NA	NA	NA	NA	NA	NA	NA	NA	NA	NA	NA
E7ENJ6;Q9BXS5;K7EJL1	25.4337	25.9867	25.617	25.2626	25.3874	25.5528	25.4967	25.3187	25.6523	25.3736	25.7795	25.5382	25.512	25.4765	24.9471	25.1517	25.5742	25.7027	25.8709	25.256	25.3765	25.5218	25.8512	25.6402	24.9597	25.4701	25.094	NA	25.5628	25.6144	25.4428	25.2111	25.4783	24.5867	24.8736	25.2307	25.1615	25.5559	25.494	25.3669	NA	25.6689	24.8422	25.2307	24.5415	25.3393	25.2789	25.4288	25.471
E7ENN3;A0A0C4DG40;Q8NF91	NA	25.535	25.9093	NA	NA	NA	NA	NA	NA	26.0476	25.9971	25.5032	25.9565	25.0549	25.682	25.0897	25.7265	NA	NA	NA	NA	NA	NA	NA	NA	NA	NA	NA	NA	NA	NA	NA	NA	NA	NA	NA	NA	NA	NA	NA	NA	NA	NA	NA	NA	NA	NA	NA	NA
E7EPS8;P28827	25.0134	25.3958	24.7393	24.5641	24.481	25.1425	23.8979	NA	24.8658	25.0587	24.4843	25.0987	24.6181	24.6937	24.6763	NA	NA	NA	NA	NA	NA	NA	NA	NA	NA	NA	NA	NA	NA	NA	NA	NA	NA	NA	NA	NA	NA	NA	NA	NA	NA	NA	NA	NA	NA	NA	NA	NA	NA
E7EPT4;P19404	25.4181	NA	25.7753	25.6001	26.2053	26.0295	25.6792	26.0914	26.3614	26.4299	26.1523	25.5289	26.5214	25.9124	26.3623	26.2286	25.9863	26.2013	25.7302	25.6932	25.7082	26.1733	NA	NA	26.6439	25.6636	25.675	NA	26.7794	26.2788	26.3276	NA	26.5611	NA	25.9841	25.8594	26.5749	26.3187	25.5711	26.2807	NA	26.1332	26.1737	25.8172	26.1645	25.4294	26.5359	NA	26.4939
E7EPV7;P37840;D6RA31;H6UYS7	28.175	27.5917	26.7701	27.9624	27.2453	27.9405	26.8386	26.6055	27.9715	27.3057	26.4834	27.235	28.6254	27.2955	26.564	27.0973	27.2539	27.1615	29.4836	31.1759	27.4021	29.132	28.0507	NA	28.6623	28.7982	29.5779	30.2975	25.828	25.6404	25.0128	30.7396	28.5481	27.6967	26.5709	28.1308	26.709	27.0421	25.0149	24.3429	27.0331	27.8758	26.2533	27.6455	28.5961	27.3878	27.791	27.0016	27.3775
E7EQ61;Q9GZZ9;E7EWE1;C9J5W5;C9JRV9	24.4558	NA	24.0364	NA	NA	24.4571	24.0366	NA	NA	24.7241	24.4349	24.2405	24.1367	24.1992	NA	24.3063	23.8989	24.0568	24.8092	24.8108	24.2688	23.6124	NA	NA	NA	24.5803	NA	NA	23.9432	NA	23.8822	NA	NA	NA	NA	NA	NA	NA	NA	NA	NA	NA	NA	NA	NA	NA	NA	NA	NA
E7EQ72;Q15363;F5GX39	23.6799	24.5335	23.633	23.8784	23.9792	24.1764	25.2483	24.7922	25.0186	23.0613	23.0796	23.1385	24.003	23.5599	22.6716	NA	NA	NA	NA	NA	NA	NA	NA	NA	NA	NA	NA	NA	NA	NA	NA	NA	NA	NA	NA	NA	NA	NA	NA	NA	NA	NA	NA	NA	NA	NA	NA	NA	NA
E7EQB2	30.8174	27.9722	25.4348	29.7147	26.5486	28.3688	27.2504	24.9013	29.3753	27.8908	26.6263	26.0678	29.666	30.4849	27.8023	27.406	30.3121	26.6418	30.1143	29.4732	27.0535	28.0479	27.6119	28.1592	28.7645	28.4918	28.1711	29.4454	27.0113	24.9827	28.5251	28.8567	28.2932	28.7083	23.5014	29.1023	26.3083	28.4244	27.626	25.8057	29.4982	28.1521	26.6569	28.1434	31.3918	29.9589	30.231	29.728	28.2257
E7EQJ3;H0YBZ8;E7ESL3;H0YBZ2;P04233	NA	25.3108	25.0706	26.8391	25.7107	26.4576	25.6257	24.6167	25.5382	25.0283	25.3224	25.0089	26.099	27.1006	24.7666	25.7532	26.7773	25.5543	NA	25.6406	26.1096	25.0781	25.8106	NA	26.2243	NA	25.8598	NA	24.9967	25.8653	25.3161	25.9603	26.3896	27.198	24.7524	25.8106	NA	26.1836	25.3863	25.1201	NA	25.6778	25.5141	26.0329	NA	26.1812	25.9063	26.777	25.6755
E7EQR4;P15311	28.0183	27.4721	25.9541	28.6463	24.9642	27.8828	27.7783	27.7529	26.841	27.5814	28.0184	28.1503	27.635	28.5088	26.94	27.0523	26.6903	26.6066	24.0815	26.4455	26.3945	25.8022	27.6422	27.0104	26.8882	26.0621	24.1448	24.846	26.2891	27.9292	24.5486	NA	28.4425	26.2929	26.5863	28.0759	24.5223	27.5182	28.0627	27.5742	27.3372	29.5712	29.7936	30.9942	28.5637	29.2873	28.0138	29.7532	29.0384
E7ER45;O43451;A0A0J9YVZ3;A0A0J9YX77	NA	NA	NA	NA	NA	NA	NA	NA	NA	NA	NA	NA	NA	NA	NA	NA	NA	NA	NA	NA	NA	NA	NA	NA	NA	NA	NA	NA	NA	NA	NA	NA	NA	19.0359	NA	19.1045	NA	NA	18.7233	NA	NA	NA	NA	NA	18.837	NA	18.9781	18.8245	19.2972
E7ER77;Q7Z2K6	24.1039	24.5735	NA	23.5794	NA	24.1237	NA	23.2739	NA	NA	NA	NA	NA	NA	NA	NA	NA	NA	NA	NA	NA	NA	NA	NA	NA	NA	NA	NA	NA	NA	NA	NA	23.6355	23.7167	NA	NA	23.6957	24.0513	22.6759	NA	23.6481	NA	NA	NA	NA	NA	23.2766	23.5438	24.445
E7ES10;B7Z574;A0A0C4DGB5;P20810;E7EVY3;E9PDE4;H0Y7F0;H0Y9H6;E7EQA0	26.343	25.8156	26.425	25.8494	25.8011	25.111	26.2706	25.6099	NA	26.3919	27.7837	26.3017	26.9	26.5117	25.534	25.9121	26.9004	25.7413	26.3675	26.8022	25.433	25.8075	26.1621	25.8591	26.1595	25.079	25.502	27.0021	25.7429	25.2982	25.6135	25.8121	25.6375	25.9924	25.9856	NA	25.6839	NA	26.5026	25.9459	25.8081	NA	26.1181	NA	NA	NA	NA	NA	NA
E7ETK0;A0A2R8Y849;A0A087WUS0;A0A2R8YD14;P62847;A0A2R8Y8A0	NA	24.812	25.0642	24.7116	25.7233	26.048	23.802	25.3169	NA	24.5827	24.6684	24.3841	NA	NA	25.4581	25.1439	NA	NA	NA	NA	NA	NA	NA	NA	NA	NA	NA	NA	NA	NA	NA	NA	NA	NA	23.7467	NA	24.7349	25.5581	NA	NA	NA	NA	25.0146	26.3598	NA	25.4565	26.147	26.5112	25.8095
E7ETU9;O00469	25.7089	NA	24.8759	26.1516	25.2744	24.0298	26.9802	24.5918	NA	24.193	23.8896	24.3585	25.5207	26.4334	24.4316	25.6022	24.9549	25.6994	NA	NA	25.7471	25.2257	26.3401	24.4387	24.4194	NA	NA	NA	26.1361	26.2791	NA	NA	24.4873	25.0615	25.1967	25.8667	24.575	24.843	26.2062	24.7681	25.0297	24.7865	24.7149	23.7299	24.9442	24.4134	24.5353	24.2383	24.0054
E7EU05;P16671;E9PLT1	33.7848	33.3569	33.1504	34.018	34.3421	34.2817	33.9713	34.2655	34.0658	34.0679	33.7848	33.4971	33.8843	33.716	32.9394	33.2697	33.3354	34.0342	32.9666	31.9782	34.1231	33.5699	33.2732	34.0147	33.5038	34.0126	34.158	33.6264	34.4701	33.9527	32.9117	33.6637	32.9048	32.8285	32.6523	34.0001	34.0998	33.5347	33.4482	33.3452	34.1232	33.7862	33.7509	32.5604	33.3385	33.9324	33.499	33.3001	33.2629
E7EV99;E7ENY0;P35611;A0A0A0MSR2;H0Y9H2	27.6313	27.7275	27.3772	27.377	27.6116	27.7225	27.021	27.43	27.196	27.3278	27.9608	28.0551	28.0671	27.5771	27.2069	27.8907	28.3423	26.9048	29.0678	28.6825	26.8077	27.7561	26.9943	27.1253	28.4384	27.5931	28.3326	28.6818	26.8725	26.7754	28.0267	28.416	27.914	27.5861	27.6314	27.6753	27.9589	27.4558	27.0948	27.6656	27.4266	27.8485	28.3803	28.6531	28.3034	27.2467	27.2574	27.5337	28.328
E7EVA0;P27816	30.6335	30.1532	31.0254	29.6646	30.2504	29.4425	31.0921	30.5588	29.6481	30.0435	31.0327	31.064	31.2099	30.5049	29.7302	30.4331	30.3309	30.381	28.546	29.3204	30.3731	29.8346	30.0597	29.178	29.0616	28.815	29.36	27.0232	30.2745	29.2823	28.3717	29.058	29.7084	29.8744	31.075	29.4105	28.6751	28.4625	30.7494	29.4252	28.2503	25.1851	29.4429	24.8894	26.4757	29.1253	24.9354	28.8667	25.2383
E7EVS6;A0A2R8YGF8;G5E9R0;C9JUM1;C9JZR7;C9JTX5	32.4572	32.7887	32.7808	32.6662	32.1741	31.7487	32.0565	32.5533	32.1956	32.7582	32.8099	32.4058	32.6287	32.3983	32.3298	32.5035	32.9854	33.2445	33.6189	33.713	33.6796	33.4052	33.4596	34.0518	34.2612	32.698	32.8873	33.3536	32.2207	32.9307	32.5652	33.0736	33.2313	33.2233	33.0557	33.0832	32.7183	32.9138	33.185	32.7586	30.1308	33.0145	33.2671	33.2841	32.9241	33.6578	33.2	33.8454	33.9334
E7EVW7;P14317	25.6512	24.1269	24.6773	NA	24.4969	24.7834	24.8355	NA	NA	NA	25.0509	24.7162	23.9213	NA	24.3876	24.2831	24.5481	25.4478	NA	24.6158	25.2866	NA	25.5645	25.3846	24.3678	NA	NA	NA	NA	25.7333	NA	NA	NA	NA	NA	NA	NA	NA	NA	NA	NA	NA	NA	NA	NA	NA	NA	NA	NA
E7EW69;E7EX04;B5ME97;Q9P0V9	25.5293	26.0467	25.213	25.4535	25.3447	25.7601	24.9961	25.1001	25.5907	24.8353	25.0372	24.6185	23.8848	25.1957	25.1246	25.1961	24.8201	24.9848	25.331	25.7068	25.0832	25.9035	25.2028	25.1986	25.3783	25.7327	25.8875	NA	25.1822	25.3733	26.4293	25.2155	25.7334	25.7205	24.9481	24.9829	25.6012	25.6893	24.8436	25.7526	25.7931	25.1814	25.09	26.09	24.9464	25.4253	25.641	25.4804	26.0624
E7EWP2;O75962;F5H228;E7EPJ7	24.2106	NA	NA	24.5717	24.5751	NA	24.2544	24.6162	NA	24.6595	NA	24.041	24.5091	25.0703	25.0798	24.8395	24.6527	NA	NA	NA	24.1932	NA	24.9425	23.954	NA	25.1882	24.9834	NA	24.5902	25.4119	25.0791	NA	NA	NA	NA	NA	NA	NA	NA	NA	NA	NA	NA	NA	NA	NA	NA	NA	NA
E7EX17;P23588;F8W0K0;F8VRU1;F8VYE9;F8VSC7;F8VP89;F8VX11	25.2022	NA	NA	25.2535	24.8569	25.6418	24.8301	25.7704	24.7743	24.807	24.0074	25.2312	26.035	NA	25.2784	25.4304	25.6418	NA	NA	NA	NA	NA	NA	NA	NA	NA	NA	NA	NA	NA	NA	NA	26.123	26.0015	24.9932	NA	NA	26.2687	NA	NA	26.8614	25.771	25.774	NA	25.2459	25.3524	25.6115	25.4862	NA
E7EX73;E9PGM1;E7EUU4	26.1276	25.6044	26.6657	25.0424	25.6944	24.9792	26.786	26.4446	25.5799	26.3151	26.814	26.9121	27.4042	26.8229	26.9703	26.1394	26.2523	26.9202	25.2088	25.5572	26.4758	26.4859	27.1427	25.0813	23.5135	25.528	25.4106	NA	27.5171	27.5576	24.4338	NA	25.777	26.0078	26.3584	26.2866	25.1539	25.1888	27.0018	25.6809	26.3322	25.3357	25.9543	24.2195	24.8566	25.3407	24.254	24.9005	25.1053
E7EX90;Q14203;Q6AWB1	29.3614	29.371	29.8873	29.4197	29.229	29.2664	29.7145	29.0222	29.1372	29.8049	29.6254	29.4859	29.2868	29.7471	29.4789	29.424	29.6557	29.5568	29.0118	29.8079	29.3978	29.3177	29.1773	29.0632	29.8082	29.4117	29.5296	28.468	29.1942	29.4656	28.6631	29.4485	29.6533	29.2736	29.6883	29.6458	29.5714	28.9693	29.9279	29.5714	29.7261	29.4487	29.7	29.7743	29.3268	29.6026	29.1167	29.0385	29.499
E9PB61;Q86V81	NA	NA	NA	NA	NA	NA	NA	NA	NA	NA	NA	NA	NA	NA	NA	NA	NA	NA	NA	NA	NA	NA	NA	NA	NA	NA	NA	NA	NA	NA	NA	NA	25.6912	25.7686	NA	NA	NA	NA	NA	NA	NA	25.0258	25.6844	NA	NA	26.5598	25.6048	NA	25.0268
E9PB90;P52789	24.44	24.81	24.2361	24.1217	23.9919	NA	24.4364	25.0677	24.6229	24.5527	24.1898	25.3228	25.4586	24.8088	25.0254	24.6263	24.3887	26.0874	NA	NA	24.6639	25.0079	24.6548	NA	23.8828	24.6925	NA	NA	25.257	NA	NA	NA	24.9168	24.9128	NA	NA	24.8219	24.5136	24.8745	25.0685	25.0976	24.5843	NA	NA	24.2887	24.2409	NA	24.7094	NA
E9PC84;J3QSU6;P24821;F5H7V9	NA	24.1626	NA	24.0877	25.597	NA	24.2245	24.3879	NA	NA	NA	25.9481	NA	26.1527	25.8274	NA	NA	NA	NA	NA	23.431	26.7002	26.8605	25.4674	25.2507	25.5461	NA	NA	24.7061	26.3874	25.9125	NA	24.061	26.52	NA	26.736	27.6277	27.3894	24.895	24.1295	NA	NA	NA	23.9194	26.2034	26.2614	25.8668	25.8482	26.1921
E9PCY5;Q02880	24.4004	24.2152	23.6498	25.1088	NA	NA	24.4252	24.4315	NA	25.2973	24.7079	24.9899	24.5437	24.8145	25.3261	24.7937	23.9377	NA	NA	NA	NA	NA	NA	NA	NA	NA	NA	NA	NA	NA	NA	NA	NA	24.4412	24.491	NA	NA	NA	24.7287	24.3752	24.9284	25.1111	24.5036	25.0601	NA	NA	NA	24.384	NA
E9PDR0;P05166;C9JQS9;E7EX59;E7EUY3;E7ETT1;E7ETT4;E9PEC3;F8WBI9	25.8466	25.2947	26.0483	26.4905	26.2216	26.2943	26.0895	26.5846	26.6564	26.4658	26.9048	26.3589	26.4456	26.1276	27.4347	27.1384	26.7972	25.8419	25.792	25.2266	26.1633	26.4351	24.9358	26.0857	26.3563	25.6186	25.8968	NA	26.4475	25.6646	26.8041	25.4147	25.8798	25.6424	26.4586	26.4745	25.6982	26.2279	25.8284	26.2671	25.3507	26.1563	26.7368	26.5708	26.8982	26.2147	27.1607	26.8643	27.3034
E9PEB5;Q96AE4	25.5035	25.4534	25.1068	25.2967	25.9374	26.3267	25.7636	25.6906	25.6061	24.6822	24.7305	25.5126	24.9409	25.8072	26.519	25.7728	25.5727	25.5744	23.8958	25.3372	25.4485	24.9565	25.8833	25.6501	24.667	25.5671	25.2077	26.6584	25.3395	26.4795	26.2855	NA	25.8126	26.1142	25.4353	25.9122	25.7267	25.9619	25.8108	25.6956	25.9003	25.3114	26.3672	26.4843	24.7846	25.5145	26.4837	26.113	26.1418
E9PEP6;O14786;E7EX60;Q5T7F0;Q5JWQ6;Q5JWQ4	27.5715	28.0133	27.8116	27.9234	28.2082	28.0015	27.5541	27.9614	27.6461	27.8123	27.6062	28.1217	27.7655	27.6139	27.9435	27.7503	28.2251	27.825	27.6828	27.8554	27.8064	27.8218	27.851	28.0417	27.5852	27.8275	27.6501	28.3882	27.9442	28.1506	28.5075	28.1416	27.9805	28.2509	27.4159	27.9949	28.5828	28.6101	27.509	28.3503	27.6799	28.1875	28.2679	28.2587	28.4992	28.4081	28.7322	28.0314	28.5221
E9PF10;O75694	NA	23.4527	23.6763	23.8353	23.9525	24.1972	24.2269	24.6478	24.1045	23.7162	23.6095	23.5603	22.9473	23.6192	23.5657	23.1798	23.4322	NA	NA	NA	NA	NA	NA	NA	NA	NA	NA	NA	NA	NA	NA	NA	NA	NA	NA	NA	NA	NA	NA	NA	NA	NA	NA	NA	NA	NA	NA	NA	NA
E9PF17;P13611;Q86W61;D6RGZ6	26.2891	25.85	24.0047	25.1958	26.547	25.7874	NA	26.9316	26.8548	26.4098	25.6482	23.3591	26.1286	26.2212	23.9715	26.435	27.0491	28.2204	29.5542	27.433	29.0647	27.8166	28.3483	28.1968	27.5831	26.6451	27.7216	27.8486	27.6201	27.9059	28.9148	27.2522	NA	26.6736	NA	24.583	26.3178	26.6923	24.4241	26.5378	26.8886	NA	24.285	25.1969	NA	NA	NA	24.6251	NA
E9PF18;Q16836;A0A0A0MSE2;A0A0D9SFP2;A0A1W2PNM1;A0A1W2PQV5;A0A1W2PQ78	29.0821	29.0407	29.0699	29.5904	30.4183	29.753	29.0744	30.0861	29.8826	30.5628	30.056	30.3681	30.2805	30.225	30.9586	30.6511	30.6818	29.5701	28.8868	29.1073	29.6318	29.0443	29.1594	29.777	29.5722	29.294	29.4642	30.269	29.7756	29.7408	30.0047	29.7122	29.5281	29.2051	29.1751	29.8341	29.5022	29.2819	29.2796	28.9682	29.1632	30.3	30.3391	29.5324	30.7346	29.994	31.0374	30.5135	30.256
E9PF19;Q9Y4P3;Q96E41	23.9972	25.1056	24.3971	24.6762	24.1187	24.2093	24.1074	24.3828	24.3078	24.448	24.5553	23.9494	24.461	23.728	24.1583	24.0461	24.1611	24.5124	24.2219	24.1515	24.5458	24.118	24.7767	24.7785	23.9563	24.4819	24.5175	NA	24.0068	24.8176	NA	NA	NA	NA	NA	NA	NA	NA	NA	NA	NA	NA	NA	NA	NA	NA	NA	NA	NA
E9PGC8;P78559	24.4984	27.6335	24.5029	NA	NA	25.9631	NA	27.432	NA	NA	NA	NA	NA	NA	26.3653	NA	27.7178	NA	NA	NA	NA	NA	26.0961	NA	NA	25.7119	26.3114	26.6608	NA	24.4488	24.3427	NA	NA	NA	NA	NA	NA	NA	NA	NA	NA	NA	NA	NA	NA	NA	NA	NA	NA
E9PGT1;Q15631;H7C1D4	25.5553	25.8816	26.9322	25.7172	26.6488	26.3685	25.0709	26.3661	26.776	26.1358	26.2476	25.7691	25.8809	25.7933	25.0631	26.0408	25.4148	27.3597	27.4864	27.1638	27.1905	26.79	26.2651	26.6367	27.1827	27.1234	26.0344	27.1332	26.15	26.0157	26.425	26.4974	27.4348	25.264	NA	25.6393	NA	25.7632	NA	26.1493	26.5195	26.0896	25.5154	27.1671	26.0916	26.0248	26.0649	26.128	26.802
E9PGT3;Q15418	NA	NA	NA	NA	NA	NA	NA	NA	NA	NA	NA	NA	NA	NA	NA	NA	NA	NA	NA	NA	NA	NA	NA	NA	NA	NA	NA	NA	NA	NA	NA	NA	NA	NA	NA	NA	NA	NA	23.6458	NA	NA	NA	23.9151	24.0001	24.213	24.2944	23.8546	24.1765	NA
E9PGT6;Q99627;H7C3S9	25.0458	25.2911	25.102	25.4521	25.2455	25.5788	25.5895	24.1161	26.0458	25.5608	25.3304	25.2131	25.6006	25.4501	25.2036	25.4496	25.4536	25.4293	26.2416	26.4948	NA	25.7538	NA	25.9251	26.2293	25.6578	25.9773	26.0142	25.3439	25.3588	25.3654	26.3103	NA	NA	25.4015	26.1798	NA	NA	NA	NA	NA	25.568	25.2601	25.3433	25.8014	25.4673	25.4925	NA	25.7414
E9PGZ1;C9J813	NA	NA	NA	NA	NA	NA	NA	NA	NA	NA	NA	NA	NA	NA	NA	NA	NA	NA	NA	NA	NA	NA	NA	NA	NA	NA	NA	NA	NA	NA	NA	NA	23.8398	25.1282	24.3986	24.8828	NA	NA	23.9202	NA	NA	NA	24.0412	23.3593	NA	23.3953	24.1369	NA	NA
E9PH82;Q8NCA5	NA	NA	24.3897	24.4522	24.0669	24.8688	23.9681	24.1341	24.3262	NA	NA	23.8147	NA	NA	NA	23.6318	23.6148	24.7142	NA	24.3195	24.1437	24.1975	24.4334	24.3377	24.6601	NA	NA	NA	24.5465	24.3259	24.6485	NA	NA	NA	NA	NA	NA	NA	NA	24.2875	NA	24.3291	NA	24.3644	24.1379	24.4602	24.0574	NA	24.0768
E9PHK0;P05452	28.5847	28.6195	28.5936	28.2362	27.8646	27.4694	27.656	27.9128	28.0265	28.3248	28.6705	28.1448	28.7583	28.3763	27.6567	28.177	28.7018	29.3321	30.4889	29.0836	29.1512	28.993	29.0405	29.7331	29.4182	29	29.8324	29.8921	28.8131	28.0795	27.7303	29.2798	28.7966	28.3964	28.9051	28.5892	26.7608	27.0758	27.9622	27.4152	28.0904	28.108	28.0581	27.7079	27.5434	27.9956	27.1419	27.4029	28.0261
E9PIM6;E9PNQ8;P04216;J3QRJ3	26.8588	27.3025	26.804	27.4212	27.5728	27.5147	26.5184	27.1703	26.4149	26.0266	26.4418	26.5794	26.5352	26.1441	26.7711	26.0325	26.8226	27.2908	27.9375	27.4785	27.5592	27.0431	28.0341	27.2617	27.3749	26.9547	26.1979	28.2368	26.8789	26.8772	26.8926	NA	27.3141	28.248	27.1611	27.3739	NA	27.6645	27.5329	27.7882	NA	26.5505	26.4215	28.0899	25.3674	27.0222	26.9583	24.7454	27.6304
E9PJ81;Q04323;E9PRQ7;A0A087WTZ5	NA	NA	24.8294	NA	24.5281	NA	25.015	24.3252	24.3576	NA	25.0121	24.4452	24.7142	24.8397	24.4679	24.2536	24.9847	24.983	24.5246	24.9071	24.6135	NA	NA	NA	24.7033	NA	25.455	NA	24.8577	24.9094	24.5317	25.4709	NA	NA	NA	NA	NA	NA	NA	NA	NA	NA	NA	NA	NA	NA	NA	NA	NA
E9PJK1;E9PRJ8;H0YDL9;H0YDJ9;E9PIF1;A6NMH8;P60033	27.7502	28.0111	26.8008	28.307	28.2235	27.5229	26.6953	27.339	27.4623	27.6745	27.9597	28.2359	28.0894	26.1767	28.1834	28.2483	27.5906	26.413	26.3265	25.9579	26.5525	26.4003	27.1227	27.191	26.4637	28.1425	28.2479	28.6365	27.6226	28.5605	29.137	28.854	28.4808	28.7758	28.3311	29.0262	28.9258	29.1256	27.4076	28.3178	27.4754	29.2317	28.7223	28.8319	28.4416	28.9149	29.6689	29.461	29.2504
E9PK01;P29692;A0A087X1X7;E9PRY8;E9PQ49;E9PI39;E9PPR1;E9PL12;E9PQZ1;E9PMW7	28.4126	28.338	28.4566	28.2433	28.2005	28.464	28.5363	28.0934	28.6009	28.258	28.7101	28.4829	28.5702	28.8022	28.2244	28.2684	28.5218	28.3473	28.1614	28.2998	28.1134	28.4578	28.6404	28.4688	28.7277	28.3806	28.2127	28.5774	28.3234	28.4967	28.3342	28.2675	28.4283	28.469	28.2772	28.5455	28.3934	28.648	28.917	28.6578	27.6272	27.5583	28.3954	27.3713	28.0072	28.0273	27.5641	28.0318	27.4271
E9PKS9;E9PQE8;E9PN70;Q9Y296;G3V1A0;G5EA23;J3KP27	NA	NA	NA	23.5	23.7695	NA	24.5052	NA	NA	23.8026	24.2942	24.1476	23.794	23.7676	23.7922	23.7821	24.1119	NA	NA	NA	NA	NA	NA	NA	NA	NA	NA	NA	NA	NA	NA	NA	24.4684	24.122	24.0757	24.1249	23.8151	NA	NA	NA	NA	23.5268	NA	23.7267	23.7932	23.7719	23.6785	NA	23.9566
E9PKU7	NA	NA	NA	NA	NA	NA	NA	NA	NA	24.0112	24.2261	25.2147	24.5855	24.6776	23.879	NA	NA	NA	NA	NA	NA	NA	NA	NA	NA	NA	NA	NA	NA	NA	NA	NA	NA	NA	NA	NA	NA	NA	NA	NA	NA	NA	NA	NA	NA	NA	NA	NA	NA
E9PLA9;G3V153;Q14444	24.4703	24.7232	NA	NA	NA	24.9508	25.2818	NA	NA	24.0141	NA	NA	24.6643	24.5905	24.1786	24.2697	24.2598	NA	NA	NA	NA	NA	NA	NA	NA	NA	NA	NA	NA	NA	NA	NA	NA	NA	NA	NA	NA	NA	NA	NA	NA	NA	NA	NA	NA	NA	NA	NA	NA
E9PLK3;P55786	29.1809	28.9028	29.4808	29.1381	29.4242	28.4859	29.5158	29.1558	29.1888	29.3678	29.3499	29.0528	29.2045	29.2478	29.4722	29.5509	29.1144	28.9138	28.8602	29.2239	28.791	28.5738	28.5632	28.5762	28.8249	28.8693	28.386	29.0694	28.5937	28.2398	28.2235	29.1185	29.1022	29.1208	29.4286	29.164	29.3985	28.3946	29.2247	29.5736	29.1539	29.528	29.1303	29.1505	28.5207	28.7806	29.2035	29.2706	29.7085
E9PLL6;P46776;E9PJD9	25.9989	26.7905	NA	25.3479	25.463	26.261	25.2076	25.4613	25.2293	NA	26.2692	26.0267	25.7751	NA	26.2447	26.3639	25.7724	NA	NA	NA	NA	NA	NA	NA	NA	NA	NA	NA	NA	NA	NA	NA	26.5891	24.7271	26.135	NA	NA	NA	NA	NA	NA	26.7696	26.5275	26.7481	25.6777	26.4923	27.4903	NA	26.8817
E9PN17;A0A3B3ITX4;O75964	29.2384	29.6266	29.245	29.1734	29.6949	29.358	29.6114	29.788	28.7785	30.0075	29.5812	29.6384	29.4752	29.2318	30.111	29.2926	29.1816	29.4173	26.5542	26.6534	29.3893	28.1816	29.5439	29.9723	28.561	29.4223	29.2146	27.1942	30.0852	29.4389	29.5982	28.2669	28.4058	28.7963	29.4875	28.9667	29.3458	29.6102	29.4719	30.2634	29.9044	30.098	30.1901	29.5436	29.4044	29.8609	30.2783	29.9045	29.2676
E9PN51;F8W9K7;E9PKH6;E9PPW7;O00217	NA	24.9286	24.5647	NA	24.9423	23.9895	24.9361	25.0013	NA	25.2019	25.1954	25.0926	25.1625	24.8846	24.871	24.3817	24.9206	NA	NA	NA	NA	NA	NA	NA	NA	NA	NA	NA	NA	NA	NA	NA	NA	NA	NA	NA	NA	NA	NA	NA	NA	NA	NA	NA	NA	NA	NA	NA	NA
E9PNW4;A0A2U3TZL5;P13987;H0YET2	30.326	29.6931	30.0638	30.1941	29.7581	29.8703	30.2239	30.051	30.3454	29.6348	29.575	29.7002	29.6069	29.4542	29.8409	30.0875	30.4799	30.3753	30.5266	30.3153	30.2236	30.5687	30.2545	30.6434	30.4801	29.6967	29.8444	30.7903	29.6073	28.9628	29.3581	29.9013	31.4881	30.8787	30.998	29.9814	29.5603	29.8566	29.7918	30.2036	29.3209	29.8274	30.2243	29.7842	29.2193	29.7446	30.431	30.1647	30.3663
F5GWE5;Q00169;I3L4H1;I3L459	26.324	26.1026	25.6341	26.0664	26.1441	26.0631	26.2979	26.1707	26.299	26.951	26.4123	26.7558	26.4159	26.5866	26.1646	26.2374	26.5854	25.9305	26.9362	27.1308	26.4156	26.4937	27.1483	26.3152	26.7223	25.9822	26.1492	26.8994	26.4451	26.6208	25.8812	26.9495	25.9096	26.4003	26.2664	26.8757	26.7245	26.8635	26.9209	25.6939	26.6645	26.6026	26.6883	26.8672	26.1177	26.0201	26.6927	26.6215	26.1331
F5GWT4;Q9H4A3;F6UYG0	24.5257	24.258	NA	NA	NA	24.1561	24.756	24.4879	24.2264	24.2388	24.5486	24.4139	24.364	24.1029	24.3381	24.0334	24.594	24.1867	24.2253	24.4185	23.8933	24.2706	NA	NA	NA	24.3679	24.0855	NA	24.4135	23.9822	24.0155	NA	NA	NA	NA	NA	NA	NA	NA	NA	NA	NA	NA	NA	NA	NA	NA	NA	NA
F5GXJ9;Q13740	NA	NA	NA	NA	NA	NA	NA	NA	NA	NA	NA	NA	NA	NA	NA	NA	NA	25.2169	22.661	24.5054	24.437	22.777	26.9031	23.0284	NA	NA	NA	NA	NA	29.4152	22.1846	NA	NA	22.5559	22.2433	NA	22.6858	22.464	NA	NA	NA	24.0517	NA	22.9509	22.3251	22.2702	NA	22.7965	NA
F5GXX5;P61803;F5H895;A0A0B4J239	27.4286	27.8075	27.0779	26.8887	27.1217	26.9115	27.5976	26.4077	25.5307	27.3579	27.3116	23.7383	27.1612	27.0568	25.8708	26.9814	26.919	27.4825	25.9359	NA	27.0969	NA	27.323	27.5213	26.5521	25.2103	NA	25.7049	26.6855	26.8857	26.5623	NA	27.5197	27.3184	28.4461	27.467	28.3643	27.9886	28.9193	29.1237	28.2678	27.985	27.8003	27.2372	26.8972	NA	27.7104	27.9077	28.1361
F5GYT8;E9PG35;E9PHF7;Q96RQ3;G5E9X5	23.74	NA	24.1121	NA	24.0099	24.2416	23.9891	24.7635	24.8841	24.9562	24.42	23.9552	25.0369	24.094	24.7179	24.2257	24.1397	23.4043	NA	NA	23.7247	24.9363	NA	23.9781	NA	24.251	24.107	NA	24.9034	23.4126	24.0442	NA	NA	NA	NA	NA	NA	NA	NA	NA	NA	NA	NA	NA	NA	NA	NA	NA	NA
F5GZS6;J3KPF3;P08195;H0YFS2	27.2612	27.6225	27.0632	26.9548	27.5794	27.4848	27.202	26.7927	27.8584	26.977	27.0577	27.7208	26.9243	26.8955	27.7986	26.9006	27.3531	26.7762	25.7034	26.3768	26.6571	26.2384	27.2518	27.0867	25.6434	26.6075	27.0025	26.8304	26.9125	27.7896	27.4586	26.5312	27.0752	26.8663	27.4887	26.953	27.7707	27.1757	27.1542	26.8337	27.2222	26.9091	27.75	26.736	26.9421	27.2331	27.5171	27.4349	27.9325
F5GZZ9;Q86VB7;C9JHR8	30.3708	30.6692	30.0945	30.1669	29.3324	29.8226	29.9575	28.8568	29.1478	29.0501	29.2529	29.3829	28.0469	29.865	30.178	29.4179	29.6613	29.411	29.732	29.6325	29.8502	29.4189	30.4147	29.7371	28.6548	28.7389	29.2335	29.5957	28.6382	29.8487	30.3919	28.3218	29.3573	30.0313	29.6549	30.61	30.1694	30.333	30.7623	29.7624	30.481	29.2867	29.5849	30.03	28.8586	30.0139	30.4439	30.0154	29.8218
F5H039;Q9NQX3;G3V582	NA	NA	NA	NA	23.9607	NA	23.6687	23.4894	23.5805	23.7158	NA	NA	NA	23.7479	24.0926	24.2174	24.1444	NA	NA	NA	NA	NA	NA	NA	NA	NA	NA	NA	NA	NA	NA	NA	NA	NA	NA	NA	NA	NA	NA	NA	NA	NA	NA	NA	NA	NA	NA	NA	NA
F5H199;F5H7C4;Q8IXL7;F5H6G9;H0YFW5	NA	NA	NA	NA	NA	NA	NA	NA	NA	NA	NA	NA	NA	NA	NA	NA	NA	24.1698	NA	NA	24.1377	NA	NA	NA	NA	23.9569	24.0911	NA	24.2286	23.7348	23.8676	NA	NA	NA	NA	NA	NA	NA	NA	NA	NA	NA	NA	NA	NA	NA	NA	NA	NA
F5H345;A0A3B3IRR1;A0A3F2YNY7;P08397;F5GY90;F5H0P4;A0A3B3IU56;A0A1W2PNU5;A0A3B3IU34;F5H226	25.5236	24.4443	24.9502	25.9592	26.0474	25.7836	25.6295	26.2055	26.6223	26.2785	24.5833	25.0418	25.3572	25.8172	25.6224	25.8154	26.1923	26.2316	28.8094	28.8611	26.6363	27.3617	27.1192	26.7839	28.4506	26.4654	27.1881	28.4488	25.5437	26.4066	25.8042	28.0967	22.8246	26.1259	25.4657	25.4449	24.0334	23.7506	25.5239	NA	25.3059	26.9482	26.1505	26.4596	27.1844	25.8847	25.8874	26.3114	25.4763
F5H365;Q15436	28.0286	28.3934	28.0798	27.9261	28.1022	28.3614	28.2131	27.942	27.8736	27.9221	27.8607	27.9986	27.8447	28.5795	27.6093	27.0637	27.9091	28.1679	28.0373	27.8443	28.2318	28.3887	28.6834	29.3725	27.7298	28.1107	27.8893	25.6828	27.8471	28.385	28.4178	27.7821	27.6094	26.7496	26.6685	26.0475	28.1537	28.3971	28.2452	27.9641	28.0867	28.0107	27.6273	28.5928	27.8504	27.9959	27.7755	27.7024	28.675
F5H442;Q99816	24.0727	NA	24.2533	23.9542	23.9943	24.328	24.1304	NA	24.3016	NA	24.0726	23.9143	24.0977	24.4015	23.9711	24.2857	24.3525	24.1213	NA	24.2614	23.9281	23.9298	24.307	24.4267	NA	23.6947	24.2113	NA	24.3633	24.7178	24.2663	NA	NA	24.2095	24.2512	24.1524	NA	24.3	NA	NA	NA	24.1955	24.0565	24.4433	NA	23.8726	24.2137	24.3693	24.2718
F5H5D3;Q9BQE3;A0A1W2PQM2	28.4688	26.2975	27.8274	28.2767	28.9221	28.3222	28.9652	29.1765	28.6822	28.2354	26.2514	27.1403	26.6514	28.1902	28.799	27.4167	27.3146	29.5543	28.7089	28.2245	29.1197	28.5566	29.5197	28.8445	28.4865	24.8513	26.7111	28.1405	28.4016	28.9548	26.8887	28.2482	25.8219	27.3011	27.8932	29.1319	26.8406	27.9226	28.6741	25.2771	25.682	26.6775	27.8126	28.2572	26.0653	27.7418	26.5824	28.1153	NA
F5H5P2;P12694;F5GXU9	24.5746	NA	24.517	NA	NA	24.219	NA	24.6811	NA	NA	24.6761	24.8573	24.527	24.313	24.6861	25.3509	24.6118	NA	NA	NA	NA	NA	NA	NA	NA	NA	NA	NA	NA	NA	NA	NA	NA	NA	NA	NA	24.419	NA	NA	NA	NA	24.6443	24.8435	24.5388	24.7246	24.4391	25.4129	24.7034	24.7444
F5H7Y6;E7ESV4;F5GX62;F5H004;F5H6R7	25.7368	NA	NA	26.7654	27.5715	26.5313	27.0232	27.1927	28.0149	26.9758	27.8438	27.2886	27.7855	27.2117	27.793	27.6196	27.1325	27.3858	27.93	27.4116	27.5039	NA	27.5969	27.2574	NA	27.4789	28.0396	28.1433	27.3946	26.6946	26.6483	27.2047	28.6018	27.6733	28.0968	27.571	27.3536	24.2196	NA	27.2333	NA	27.2005	27.102	27.0101	27.2458	27.4771	27.5598	NA	25.2905
F6UJY1;Q5T013;J9JIE9;E7EWH8;H0YB70;A0A0A0MTR5;F6UJY9;H0YB18	23.7643	23.8627	24.1008	24.0415	24.5344	24.6014	21.9713	25.1961	24.8707	25.5795	24.5038	24.8829	24.3685	24.4588	24.9599	25.2597	24.4604	24.4014	24.2049	24.8966	25.2597	24.366	24.285	24.6512	25.0473	24.9128	NA	25.2312	24.3509	24.2324	24.8701	25.1746	NA	NA	25.0302	24.8551	NA	NA	NA	NA	NA	NA	24.0161	25.4892	25.0533	24.2808	25.2203	NA	25.2706
F6WQW2;P43487;C9JXG8;C9JJ34;C9JGV6;C9JDM3	25.9735	25.6458	26.3635	25.2727	25.7769	25.1205	26.1788	25.6746	NA	25.0521	25.3649	25.6265	26.5018	25.7481	26.3869	26.2511	25.8011	24.6571	27.7091	27.599	26.1943	26.8531	NA	25.7219	26.3773	26.5022	26.7873	26.3285	26.0794	26.1014	25.083	25.4174	25.8474	24.4502	NA	24.6322	NA	NA	25.0051	NA	24.2538	26.0391	26.3216	NA	25.8132	26.0857	25.37	25.7811	24.9849
F8VNT9;F8VV56;F8W022;F8VWK8;P08962	25.2245	NA	25.0332	24.5303	24.5892	25.595	24.0893	24.7782	24.6796	23.3631	23.451	24.3674	24.0966	24.5709	24.3246	24.5815	24.75	NA	NA	NA	NA	NA	NA	NA	NA	NA	NA	NA	NA	NA	NA	NA	25.1377	NA	NA	NA	25.359	25.2041	NA	25.0862	25.3128	NA	24.7998	NA	24.4271	NA	25.7517	NA	24.8389
F8VPD4;P27708	23.4508	23.512	23.0675	23.6481	23.6137	23.3814	23.7864	23.3737	NA	22.5574	NA	22.4874	23.3833	22.7834	22.7337	23.6017	NA	22.998	23.4719	NA	22.9656	23.6391	NA	23.7245	23.1247	NA	NA	NA	23.0577	NA	22.9293	NA	23.2534	NA	NA	23.7308	23.2687	23.2624	23.2853	23.3308	NA	23.6134	NA	23.6784	NA	23.0861	23.4369	23.6384	23.0689
F8VR84;Q9HB07;F8VQQ3	23.7798	23.3769	23.851	23.6975	23.7898	23.7052	24.2084	23.813	23.6403	23.7607	23.5631	24.0118	NA	23.7641	23.8684	23.5135	23.6964	25.2929	24.2256	NA	23.8743	NA	NA	NA	NA	24.0427	23.7329	NA	24.5097	25.0294	24.5496	24.2364	NA	23.8023	23.2221	23.5911	NA	NA	23.82	NA	NA	23.7603	NA	23.9744	23.9016	23.6256	23.5757	23.8817	23.8418
F8VRR3;F8VQZ7;P50579;G3V1U3	24.3145	23.9526	24.0265	NA	NA	24.7357	23.9808	23.6698	24.2734	NA	24.1794	24.044	23.8553	23.5809	24.1205	24.3333	24.5094	24.0043	24.8097	NA	23.9636	24.0531	23.8221	23.7818	23.8085	24.8598	24.9052	NA	24.3936	24.6371	25.5381	NA	23.0714	NA	NA	23.9254	NA	23.7754	24.1032	NA	NA	24.4356	23.6805	23.683	23.7148	23.7159	24.0441	23.6374	24.8806
F8VU90;Q9NYL4	NA	NA	NA	NA	NA	NA	NA	NA	NA	NA	NA	NA	NA	NA	NA	NA	NA	NA	NA	NA	NA	NA	NA	NA	NA	NA	NA	NA	NA	NA	NA	NA	22.5965	23.8214	23.348	NA	NA	NA	23.0392	23.8225	23.3978	NA	23.4507	23.6455	23.2695	22.3713	23.4212	NA	22.7601
F8VVA7;P61923;F8W651;F8VXB1;F8VUC5;F8W156;F8VYZ4	24.0768	24.5755	24.5878	24.195	25.0727	24.8748	24.409	25.6596	25.2512	24.058	25.05	24.2358	24.3966	24.7525	24.6104	24.5263	24.4904	25.4352	25.2248	25.6636	25.1629	NA	26.0664	25.2876	NA	24.5362	23.6876	NA	24.7334	25.8017	24.6475	NA	NA	NA	NA	NA	NA	NA	NA	NA	NA	NA	NA	NA	NA	NA	NA	NA	NA
F8VW96;Q16527;F8VQR7	26.3734	25.4766	25.3663	25.518	25.6622	25.3151	24.9926	24.8216	NA	25.9831	25.3585	26.3295	25.7266	25.6052	26.3107	25.7154	25.5933	26.4685	25.2646	24.701	26.6571	26.2972	NA	26.0705	NA	25.5798	25.4857	NA	25.7545	26.0909	27.1592	NA	27.6591	27.2789	26.4446	24.8963	26.1632	NA	24.4922	NA	26.4167	25.6154	25.5183	26.598	25.6161	NA	26.2549	25.9353	25.4878
F8VWT9;J3KPF0;Q9Y4D8	27.9995	28.0754	28.0986	28.1923	28.1682	27.803	27.7146	27.5701	NA	27.8134	28.0723	28.0429	27.9646	27.7861	28.0933	28.1101	28.128	26.9836	NA	NA	NA	NA	NA	NA	28.0369	27.9153	28.1926	28.5508	26.9175	NA	28.0562	NA	28.5055	28.1052	27.8972	27.872	28.2768	27.962	27.9046	28.3345	28.3384	27.3823	27.9497	27.4621	27.5788	27.467	27.7892	27.7869	27.3063
F8VXC8;Q8TAQ2	24.1305	24.2877	23.8347	24.4225	24.3398	23.6909	24.3067	24.785	NA	24.948	25.5666	25.6086	25.2081	25.5093	25.8086	25.06	NA	24.8038	24.3721	24.0507	24.9031	25.3827	24.6914	24.3065	NA	24.025	24.0812	NA	24.1126	24.8568	24.2618	NA	NA	NA	NA	NA	NA	NA	24.5686	NA	NA	24.3615	25.338	26.4291	24.351	24.1866	24.6751	25.0235	25.5759
F8VYE8;P36873;F8W0W8;F8VR82;A0A087WYY5	23.7768	23.5485	23.4831	NA	NA	NA	NA	NA	NA	NA	24.3227	24.1468	24.1521	24.507	NA	24.0236	24.1283	24.4534	NA	NA	24.398	NA	NA	NA	22.6046	24.8789	NA	NA	24.7786	25.2394	25.2408	23.8671	NA	NA	NA	NA	NA	NA	NA	NA	NA	NA	NA	NA	NA	NA	NA	NA	NA
F8VYN9;P40616;B4DZG7	23.1058	24.548	NA	24.4643	24.0712	24.298	24.8665	24.7518	25.1118	NA	NA	NA	NA	NA	24.0297	24.1402	NA	24.2111	23.8295	NA	NA	NA	24.4783	24.1682	23.8824	24.1177	24.3342	24.3139	24.0148	24.2252	24.3547	NA	24.2474	23.8689	24.269	24.2211	23.9278	24.0455	NA	24.8298	NA	23.4373	22.9149	23.2706	23.6978	23.8425	23.1207	NA	23.6699
F8VZJ2;H0YHX9;Q13765;E9PAV3;F8W0W4;F8W1N5;F8VNW4	26.9341	27.387	27.0133	26.9623	26.3384	27.235	26.8681	27.0902	26.6927	26.934	27.5354	27.1663	27.4913	27.1467	27.0624	27.0562	27.3284	26.6251	26.5707	27.1579	26.7828	NA	27.3747	27.5676	27.583	26.8429	27.2451	28.3536	27.087	27.442	27.3668	27.8936	28.0185	27.7243	26.9857	27.2595	27.2755	27.1951	27.2527	27.4067	26.2679	27.2103	27.7297	27.587	26.7538	27.8579	28.0611	27.6076	27.2101
F8W031;F8VXJ7;Q9Y2B0;F8VP03	26.8762	26.8215	26.893	26.2529	26.6374	26.8187	27.048	26.5682	27.173	26.6491	26.8929	27.632	27.1132	26.7623	26.7699	26.6134	27.3322	26.6516	25.4646	25.6061	26.1903	25.4905	25.8602	25.5407	24.8342	26.368	26.4807	27.0817	26.2997	25.8206	25.8529	NA	27.8572	27.562	27.2881	27.1486	26.7707	26.5086	27.1206	26.768	27.5103	26.5519	27.0724	26.3219	26.019	26.5976	26.8072	26.4254	26.9299
F8W1A4;P54819;F8VZG5;G3V213;F8VY04	27.5948	27.0818	28.0478	28.1079	27.852	27.8537	27.62	27.9895	28.1114	27.3649	26.9725	27.0889	27.4567	28.395	28.8461	28.1142	28.3734	27.8672	27.6369	27.891	28.233	28.1198	28.2253	27.5371	28.2583	28.2809	28.0621	27.9952	28.5525	28.1913	28.1726	27.7031	25.2353	25.7757	27.455	27.1783	27.3792	27.4227	27.3537	26.8695	25.7131	28.3297	27.9613	27.4646	27.9761	27.7176	28.4933	28.1186	28.38
F8W1R7;G3V1V0;P60660;J3KND3;G8JLA2;B7Z6Z4;F8VPF3;G3V1Y7	30.0359	29.7307	29.2642	29.9644	30.2163	29.9789	30.2834	32.6522	30.6027	30.4501	30.558	29.9003	30.3907	29.7765	29.8251	30.2463	30.1076	30.5972	30.5188	30.5609	30.6156	30.8272	30.8433	31.0173	31.0306	30.3214	30.711	31.2296	30.4725	30.6566	30.2683	30.1782	31.843	30.8455	31.2463	30.7866	30.0645	30.1232	29.8866	30.8799	31.5852	30.3319	30.6429	30.8677	30.2553	31.044	30.7951	31.0716	30.4133
F8W6G1	23.3379	23.1424	23.1099	23.849	23.9363	NA	23.8438	23.3094	NA	23.8715	23.5245	23.7134	23.7966	23.5148	24.2195	24.2011	23.5763	23.9824	23.7594	23.6429	24.2546	NA	25.2606	22.7285	NA	23.526	23.6499	NA	23.3584	24.0286	22.4177	NA	22.1564	23.6141	23.3264	23.3445	23.0651	22.8535	23.4377	23.0887	23.3737	23.4474	23.2672	23.4684	23.2419	22.9433	22.8466	23.3127	23.3608
F8W6I7;P09651;F8VZ49;Q32P51;F8VTQ5;F8W646	27.2837	27.0369	27.2042	27.3939	27.3919	28.0392	27.6512	27.6561	27.7877	28.0975	27.7749	28.1949	27.9664	27.7306	27.3854	27.536	27.6311	27.8035	27.917	27.9108	27.4016	27.5381	28.153	27.6892	27.1848	27.6387	27.4166	28.1236	27.9112	28.5702	28.4141	27.7061	28.1692	27.1393	27.624	27.2764	27.2472	27.6909	27.7562	27.6934	27.0493	27.9183	28.1708	27.5351	27.7333	27.8427	27.8527	28.0479	27.1409
F8W717;A0A3B3IU69;O00423;G3V500;G3V3N9	24.8425	25.74	NA	25.686	24.5697	24.7676	24.0206	NA	25.4153	NA	23.7316	NA	NA	NA	23.8333	24.1795	24.0873	NA	NA	NA	NA	NA	NA	NA	NA	NA	NA	NA	NA	NA	NA	NA	NA	NA	NA	NA	NA	NA	NA	NA	NA	NA	NA	NA	NA	NA	NA	NA	NA
F8W726;Q14157	NA	22.8967	23.7507	NA	NA	NA	NA	23.3225	NA	NA	NA	23.2028	23.2129	22.7764	22.9518	23.1338	NA	NA	NA	NA	NA	NA	NA	NA	NA	NA	NA	NA	NA	NA	NA	NA	NA	NA	NA	NA	NA	NA	NA	NA	NA	NA	NA	NA	NA	NA	NA	NA	NA
F8W7C6;A0A087WV22;X1WI28;P27635;H7C123;H7C2C5;Q96L21	26.8123	26.3539	25.2199	26.8358	26.2205	26.9408	26.78	26.4945	26.1169	26.2558	26.6358	26.5136	26.0265	26.9354	27.0015	26.2099	26.071	26.265	26.3476	24.7092	25.7823	25.7424	26.6368	25.6014	NA	25.296	26.1408	NA	26.727	27.4458	27.4862	25.3009	26.7663	25.2185	26.2392	26.6954	26.7545	25.9705	26.4543	27.2135	25.7322	26.3571	25.8342	27.0178	26.3454	26.6565	27.1716	26.3021	27.4041
F8W7Q4;Q96A26;E9PH05	NA	NA	NA	NA	NA	NA	NA	NA	NA	NA	NA	NA	NA	NA	NA	NA	NA	25.8039	25.2989	25.0404	25.4855	25.0855	24.621	NA	NA	25.2322	NA	NA	26.0629	25.7092	25.4236	NA	27.1285	26.8937	26.2293	NA	NA	25.7448	25.7227	26.4096	NA	NA	NA	NA	NA	NA	24.744	25.4301	NA
F8W809;A0A087WSW9;A0A182DWI3;A0A087WSY9;Q16881;E9PIR7;E2QRB9	27.3907	27.0635	27.6475	28.017	28.3918	28.2003	28.0281	27.8542	27.7283	27.2396	27.303	27.0508	27.2201	28.4312	26.5464	26.4416	26.2524	27.76	27.2151	27.1164	26.915	27.1944	27.4932	27.3037	26.1822	27.4999	27.4963	27.4069	27.7072	28.2863	26.3654	26.7876	26.6367	27.0765	27.2476	27.5073	27.7227	28.7201	28.4983	27.3105	26.0141	28.2385	26.9518	27.6938	27.296	27.5399	27.5201	27.483	27.5148
F8W8M4;A0A0A0MRL6;A0A3B3IS55;O14639;J3QSX6	23.8215	NA	24.4827	24.3591	23.7743	24.5469	24.6197	24.1221	24.2532	24.7463	24.8097	25.0854	24.0183	24.3157	24.061	24.7323	24.3077	NA	NA	NA	NA	NA	NA	NA	NA	NA	NA	NA	NA	NA	NA	NA	NA	NA	NA	NA	NA	NA	NA	NA	NA	NA	NA	NA	NA	NA	NA	NA	NA
F8WAE5;Q9BY44;C9IZE1	NA	NA	NA	NA	NA	NA	NA	NA	NA	NA	NA	NA	NA	NA	NA	NA	NA	23.6824	NA	NA	24.1589	24.363	24.3983	23.7727	24.5125	NA	NA	NA	23.9426	24.4656	24.0921	NA	NA	NA	NA	NA	NA	NA	NA	NA	NA	NA	NA	NA	NA	NA	NA	NA	NA
F8WAU4;C9IZ01;Q96RP9	23.4909	23.7586	23.6461	NA	23.7633	23.4368	24.0865	24.022	NA	24.0272	23.396	23.9727	24.158	23.8594	24.1413	23.7271	23.4912	NA	NA	NA	NA	NA	NA	NA	NA	NA	NA	NA	NA	NA	NA	NA	23.1885	NA	24.4142	24.0936	NA	NA	NA	24.2619	NA	23.9309	22.6664	23.647	23.9955	23.4102	NA	NA	NA
F8WCF6;P59998;H7C0A3	29.395	29.2826	29.1909	29.0932	29.0588	29.0477	29.2722	29.0284	29.3829	29.1766	28.8583	29.2262	28.9244	29.3042	28.9967	28.5265	28.946	29.5342	29.2954	29.2841	29.1439	29.3018	29.9221	29.6976	29.2841	28.6847	28.5571	28.5629	29.0759	29.7244	29.1845	28.7469	28.2238	30.0368	29.853	29.57	28.0132	28.5992	28.0272	26.8515	26.4336	28.8115	28.7908	29.0418	28.587	29.2003	28.7119	27.684	29.2689
F8WCI3;A0A0A0MRG9;Q96SN8;F8WF55	29.371	28.5655	28.2725	29.2103	30.6036	29.7979	28.9094	29.8043	NA	28.8187	29.2572	28.1548	29.3038	NA	27.8964	29.3954	NA	NA	NA	NA	NA	NA	NA	NA	NA	NA	NA	NA	NA	NA	NA	NA	NA	NA	29.1473	29.6179	28.8067	30.7608	29.4057	28.8529	28.8632	28.5426	30.3473	28.4042	29.7661	30.2369	27.943	28.8627	29.9964
F8WDX0;F8WB12;F8WDS8;C9J0U9;D3YTH5;A8MUM1;Q53HC9	23.3563	23.6579	23.5581	23.3183	23.4678	NA	NA	NA	NA	NA	NA	23.3849	NA	23.3742	22.4358	23.1339	23.395	NA	NA	NA	NA	NA	NA	NA	NA	NA	NA	NA	NA	NA	NA	NA	NA	NA	NA	NA	NA	NA	NA	NA	NA	NA	NA	NA	NA	NA	NA	NA	NA
F8WF14;P06276;F8WEX7	24.2195	25.1067	24.4364	24.6326	NA	25.0772	23.3287	NA	24.6623	25.2908	24.7914	NA	25.248	24.6021	23.9779	24.0456	25.1806	NA	NA	NA	NA	NA	NA	NA	NA	NA	NA	NA	NA	NA	NA	NA	NA	NA	23.8712	24.8882	NA	NA	NA	NA	NA	26.5034	24.9735	24.4805	25.6557	24.6835	24.5779	25.4712	25.3805
F8WF48;Q99442;F8WCJ7	24.5309	NA	24.7079	NA	23.2774	NA	24.5648	23.9712	23.5668	25.0388	24.4289	24.5997	24.3875	24.9831	24.8661	25.093	24.8713	23.8224	23.7859	NA	23.5803	24.8669	23.5952	24.6802	NA	24.2273	24.3168	NA	23.7353	23.8275	22.6838	23.9345	25.2446	NA	NA	NA	24.9071	NA	24.9014	24.5585	24.5673	24.232	25.1344	NA	NA	NA	NA	NA	NA
F8WJN3;Q16630	NA	NA	NA	NA	NA	NA	NA	NA	NA	NA	NA	NA	NA	NA	NA	NA	NA	NA	NA	NA	NA	NA	NA	NA	NA	NA	NA	NA	NA	NA	NA	NA	NA	NA	NA	NA	NA	NA	NA	NA	NA	23.1209	23.8038	23.8696	NA	NA	23.5866	23.5757	NA
G3V0I5;P49821;B4DE93	26.962	27.1551	26.8762	26.5159	27.0721	27.1968	26.6235	26.5972	27.0974	27.2748	27.1037	26.7834	27.2874	27.0944	27.373	27.6443	27.6033	26.7107	26.639	26.6911	26.4696	26.9325	26.6965	27.1625	27.1043	26.8558	26.6413	26.159	27.2352	26.8919	27.1565	26.3108	26.2261	26.5828	26.6833	26.7743	26.125	26.7322	26.6601	26.6527	26.6371	27.1666	26.2635	27.058	27.0918	26.7885	27.1849	27.2935	27.615
G3V1C3;Q9BZZ5;H0YER7	24.3587	24.8649	24.2743	24.7673	24.1121	24.3602	23.7674	24.5142	23.9589	24.69	23.7802	24.0231	NA	24.3342	24.7338	24.075	24.3642	23.9843	24.5751	24.6116	23.988	NA	24.2493	NA	NA	24.1824	NA	NA	24.0517	24.3412	25.1149	NA	NA	24.6567	NA	24.7361	NA	NA	NA	NA	NA	23.8376	23.7875	24.7201	24.3426	23.8592	24.206	23.855	24.5965
G3V1L9;Q07157;A0A087X0K9;G5E9E7	25.8208	25.0438	26.1876	24.5274	25.4104	25.2947	26.1567	26.0003	25.3433	26.7189	25.965	25.8106	25.4844	24.9649	25.253	26.0908	25.788	25.4712	NA	NA	25.3106	26.4441	25.7857	26.5016	25.4267	25.4816	24.7933	NA	25.724	25.1457	25.3347	NA	26.6387	25.6271	25.9318	26.7689	NA	26.9417	25.1496	26.6842	25.7145	25.9497	26.2093	NA	25.769	24.9297	25.0596	25.7277	24.8092
G3V1P3;Q969J3	NA	NA	23.3177	NA	23.1904	23.1696	23.5449	23.3424	NA	NA	23.3292	23.4396	23.3565	NA	NA	NA	NA	NA	NA	NA	NA	NA	NA	NA	NA	NA	NA	NA	NA	NA	NA	NA	NA	NA	NA	NA	NA	NA	NA	NA	NA	NA	NA	NA	NA	NA	NA	NA	NA
G3V1R5;B1AKJ5;O43847;F5H7V1;H0Y5G9	NA	NA	NA	NA	NA	NA	NA	NA	NA	NA	NA	NA	NA	NA	NA	NA	NA	23.4143	23.4293	NA	23.015	NA	24.5824	23.2278	NA	NA	24.0858	NA	NA	23.4982	NA	NA	NA	NA	NA	NA	NA	NA	NA	NA	NA	NA	NA	NA	NA	NA	NA	NA	NA
G3V203;J3QQ67;Q07020;H0YHA7;F8VYV2;A0A075B7A0;F8VUA6	27.4393	28.1414	27.3987	27.1693	27.1287	27.375	28.2887	28.0714	28.3528	27.329	27.1875	27.7228	27.3663	27.8099	28.0043	26.5492	27.4892	26.5519	26.8113	27.4239	27.5145	27.2914	28.8333	27.973	26.8879	26.6516	27.3642	NA	27.1446	28.5138	27.8139	NA	28.4835	28.7391	28.213	28.0236	27.9731	27.5113	28.3444	28.6491	28.5798	27.8556	27.2436	28.5026	27.6916	28.0506	28.5084	27.5199	28.1801
G3V3G9;Q5TAQ9;V9GY54	NA	NA	NA	24.2028	24.2074	NA	23.8915	24.1412	NA	24.6506	24.3812	24.3785	24.7419	24.1634	24.0068	23.7862	24.2356	23.9771	NA	NA	NA	NA	23.987	23.7592	23.2899	24.449	24.1059	NA	24.4661	24.1256	23.9119	NA	NA	NA	NA	24.2101	23.7183	24.3664	24.1212	NA	NA	23.5242	23.7257	23.6768	NA	24.0375	23.7392	24.3744	NA
G3V4U0;Q9UBX5;G3XA98	25.5351	28.4728	26.0222	25.8281	26.7029	24.9774	25.0659	26.0136	25.8093	25.7618	26.7582	26.8494	24.5529	27.187	27.0772	26.6251	26.8942	26.6286	27.4003	25.0934	25.6163	27.1737	26.6131	27.6448	26.6281	26.0123	26.2555	25.7104	25.5942	NA	27.0991	26.9628	27.5134	26.5766	26.6539	26.4865	26.6084	26.3849	26.1623	26.3135	26.5901	26.3662	27.5434	27.3156	26.6666	26.8746	26.8418	25.89	26.3813
G3V511;G3V3X5;Q14767	NA	26.5674	26.492	NA	NA	NA	NA	NA	NA	NA	25.233	25.942	NA	NA	26.2556	26.1653	26.4047	NA	NA	NA	NA	NA	NA	NA	NA	NA	NA	NA	NA	NA	NA	NA	NA	NA	NA	NA	NA	NA	26.3156	26.337	NA	25.67	26.6771	25.4015	25.5134	25.5386	NA	NA	NA
G3V576;G3V4W0;B4DY08;B2R5W2;G3V4C1;G3V2Q1;P07910;G3V555;G3V575;G3V5X6;G3V3K6;G3V251;B4DSU6;G3V4M8	28.4528	28.966	28.2678	28.8615	28.5789	29.1397	28.9355	29.2123	28.3865	28.6836	27.8737	29.1031	27.954	28.7484	29.278	28.7486	28.6531	28.5392	26.911	NA	28.6968	27.9831	28.1829	28.8329	28.0778	27.4098	27.3361	27.6125	28.9504	28.6956	29.1396	27.3683	27.6522	27.743	28.2189	28.7758	28.8309	29.2655	29.1813	28.9153	29.3972	28.5468	28.1448	29.6167	27.9745	28.1897	27.8764	28.9065	29.0665
G3V5A9;G3V4B7;Q92843;G3V3G8;H0YJC7	NA	NA	23.5899	23.4145	23.9019	23.691	23.4764	23.6603	24.105	23.3686	23.6507	23.6403	NA	23.6396	23.6781	23.1978	NA	NA	NA	NA	NA	NA	NA	NA	NA	NA	NA	NA	NA	NA	NA	NA	NA	NA	NA	NA	NA	NA	NA	NA	NA	NA	NA	NA	NA	NA	NA	NA	NA
G3V5H2;Q96L50	27.5435	NA	26.3598	26.12	26.1191	26.4356	26.3399	26.906	NA	25.1789	NA	NA	25.8385	26.2492	24.7549	26.0073	NA	NA	NA	NA	NA	NA	NA	NA	NA	NA	NA	NA	NA	NA	NA	NA	NA	NA	NA	25.63	26.0848	25.6847	24.9767	NA	25.1948	NA	NA	NA	NA	NA	NA	25.9944	27.0716
G3V5R9;Q07866;G5E9S8;G3V2E7;F8W6L3;G3V3H3;E7EVH7	25.6603	23.8839	25.8962	25.4125	24.6294	26.3009	26.5166	25.4495	24.9177	24.6082	24.5993	24.8624	24.8387	25.3335	25.7369	25.5084	24.1984	25.7302	NA	24.6967	25.1814	24.7688	25.0422	23.6929	NA	24.9067	24.3269	NA	25.3032	26.0284	24.9095	NA	25.6722	NA	25.2513	24.9168	25.2772	25.1018	26.1042	25.225	25.5335	NA	NA	NA	NA	NA	23.7588	23.8188	NA
G3V5Z7;P60900;G3V295;G3V3I1	29.4657	29.004	29.0975	29.2819	29.3685	29.4541	29.8604	29.2106	29.8295	28.9957	29.1126	29.211	29.2681	29.1479	29.2291	29.1708	29.4165	29.4124	29.8399	29.5337	29.2197	29.0283	29.1079	28.9061	29.3602	29.5666	29.5026	29.8818	29.2991	29.1172	28.9418	29.4993	27.7312	28.0893	28.3302	27.7631	25.2854	28.6977	28.1913	27.9626	26.2515	28.9936	29.286	28.5406	28.878	29.135	29.0091	28.6696	28.7933
G3XAI2;P07942	31.6433	30.519	32.4549	31.6383	32.0462	31.6701	31.8424	31.4374	31.7956	31.6852	32.2642	32.3063	32.1187	32.7365	32.0825	31.6399	32.176	30.0404	29.4605	28.9821	29.7923	29.6642	28.9769	29.5289	29.4759	31.1974	31.6974	30.324	30.9406	30.1318	31.1445	30.9354	32.3478	31.0265	32.2504	31.9122	32.4111	31.9227	32.0045	31.7658	32.4996	31.7233	32.1536	31.3396	32.0344	32.7151	31.8925	31.3771	31.7691
G3XAM2;E7ETH0;P05156;A0A2R8Y3M9;A0A087X0I2	27.9337	28.673	27.1821	27.5951	26.9897	27.3925	25.9588	27.3408	27.4868	27.5974	28.1134	26.5831	28.2785	26.8805	27.1307	27.8411	28.5574	26.4957	29.549	28.9666	26.7548	27.5333	26.985	26.8827	28.6169	28.3239	28.5384	28.9674	25.9992	26.1285	25.8941	29.0592	27.6988	28.1712	26.9985	27.7253	26.9425	27.2038	25.6608	26.805	26.6693	28.0678	28.4566	27.4744	28.8204	27.6212	27.6359	28.0073	28.1338
G5E9Q7;P51553;E7EQB8;E9PF84;H7C1W2	24.4807	NA	24.8014	25.4718	25.3046	24.6365	25.1907	25.6499	24.8442	25.5767	25.6921	25.7811	25.6111	24.9607	25.7328	25.6598	25.4305	25.2773	NA	NA	25.0249	25.6933	24.746	25.2624	25.4581	24.9447	NA	NA	25.3567	NA	25.4838	NA	25.2883	25.2077	24.873	NA	NA	25.2254	25.2502	NA	NA	25.4587	24.9457	24.5955	25.6803	25.6664	25.9254	25.0457	25.2608
G5EA31;P53992	26.4698	26.6845	26.6288	26.5489	26.4046	26.5976	26.9435	26.1992	25.9173	26.3457	25.9865	26.499	26.0954	26.8102	26.3472	26.1286	26.3773	26.7999	25.9431	26.4411	26.7909	26.4169	26.9227	26.8321	25.1424	26.6899	26.4558	25.7321	25.9825	26.5306	26.4117	25.9605	26.1516	26.5642	26.7802	26.478	26.5989	26.7059	26.6147	26.623	26.7834	26.3347	26.065	26.8014	26.5494	26.4832	26.0224	26.3593	27.0435
G8JLB6;P31943;E9PCY7;D6RBM0;H0YB39	27.7725	28.5271	27.9804	28.1106	27.6248	28.6485	28.0241	27.7266	28.1091	28.0991	27.5494	28.5389	28.0144	27.8167	28.1157	28.2233	27.9093	28.1245	27.7391	28.2428	28.4867	28.2444	28.7654	28.627	28.0461	27.9563	28.2598	28.5254	28.1229	28.7817	28.9609	28.0386	28.1171	27.7041	28.1081	28.3379	27.8883	28.5192	28.4733	28.0585	28.3648	28.4959	28.4508	28.7582	28.1229	28.0904	27.666	28.4074	29.1076
G8JLD5;O00429	25.7615	24.4691	25.4348	24.9376	25.6389	24.1928	26.434	26.0739	25.1105	25.7226	25.4118	26.3655	26.257	25.4464	25.8288	24.4258	24.7774	25.7713	24.6762	24.8667	24.955	24.9641	25.0389	25.249	24.8986	25.1021	24.4682	NA	27.1295	25.6718	24.2512	25.6291	23.8829	24.8615	24.2234	24.8937	23.7984	NA	25.8756	25.1477	24.5079	24.6722	24.3957	23.9813	23.8188	23.823	24.3629	25.0108	24.0478
G8JLK1;Q9NZ43;M0QYT5	NA	NA	NA	NA	23.554	22.9446	23.2741	NA	NA	23.018	23.2111	23.4986	23.343	22.479	NA	NA	NA	NA	NA	NA	NA	NA	NA	NA	NA	NA	NA	NA	NA	NA	NA	NA	NA	NA	NA	NA	NA	NA	NA	NA	NA	NA	NA	NA	NA	NA	NA	NA	NA
H0Y3P2;D3DQV9;P78344	24.146	24.2659	23.3539	24.9498	24.487	24.8506	24.1655	25.3174	24.6921	24.8251	23.583	24.3047	24.2659	24.916	23.8353	24.44	23.9776	24.3414	23.8376	24.0552	24.6425	24.2607	24.378	25.0313	24.3599	22.7392	NA	NA	23.8169	24.6405	23.3341	23.2098	22.9778	23.1741	NA	NA	NA	24.1756	23.8565	24.4593	NA	24.4939	24.0291	24.5468	23.9524	23.044	23.3191	24.0803	24.064
H0Y4R1;P12268	25.8999	26.5383	25.8778	26.3315	25.6791	26.1578	25.9514	26.1657	26.0529	25.5584	25.9082	25.4676	25.3497	25.5344	25.8163	25.09	24.7367	25.6431	25.9396	26.3875	26.2263	26.0071	26.4444	26.3569	26.5049	25.5669	25.4079	26.3371	25.7408	26.8077	26.6828	25.4862	25.8094	25.3752	23.8289	25.0591	24.8809	25.442	25.6741	25.2321	25.2806	25.8283	25.2862	26.1968	24.6724	25.6234	26.2364	25.1466	25.9595
H0Y5B0	NA	NA	23.9039	NA	23.7817	24.1053	24.7915	NA	NA	24.1148	24.6542	23.9426	24.7457	NA	NA	23.6468	NA	NA	NA	NA	NA	NA	NA	NA	NA	NA	NA	NA	NA	NA	NA	NA	NA	NA	NA	NA	NA	NA	NA	NA	NA	NA	NA	NA	NA	NA	NA	NA	NA
H0Y6F8;A0A140T9G9;A0A140T9G7;A0A140T9A6;A0A140T992;A0A140T977;A0A140T968;A0A140T961;J3KQ99;A0A140T9Y9;A0A140T9U4;A0A140T9R4;A0A140T9H1;A0A140T9F8;A0A140T9D6;A0A140T914;A0A140T9Y8;A0A140T9U1;A0A140T9J4;A0A140T980;A0A140T909;A0A140T900;A0A140T8Z9;P20036	23.9054	24.3865	23.2772	24.0953	23.4912	23.9783	NA	23.7492	NA	23.3233	24.4268	24.326	23.7792	25.797	23.2063	23.454	24.1882	24.1096	23.7972	24.7483	25.0969	NA	24.6525	24.1849	23.4979	24.3062	23.9156	NA	23.5264	24.5625	NA	NA	NA	NA	NA	24.6195	NA	NA	NA	23.9652	NA	24.2613	25.0477	23.7316	23.4789	25.0431	NA	NA	24.1061
H0Y8C3;Q9NZJ7	NA	24.5762	NA	24.4211	24.0635	24.7242	23.5125	24.2789	24.4387	NA	NA	NA	NA	NA	24.4645	24.7986	NA	NA	NA	NA	NA	NA	NA	NA	NA	NA	NA	NA	NA	NA	NA	NA	NA	NA	NA	NA	NA	NA	NA	NA	NA	NA	NA	NA	NA	NA	NA	NA	NA
H0Y8X4;O43598	26.5727	26.7335	26.6355	27.0443	26.6146	26.6394	26.6707	26.8824	27.1075	27.0071	27.027	27.0101	26.9646	27.0295	26.9388	26.9934	26.8233	27.3936	27.643	27.5857	26.5283	26.638	26.475	NA	28.0459	27.3521	26.5431	27.2762	27.0216	26.6054	27.0831	27.4715	25.6906	25.1746	26.452	27.131	25.4688	26.4491	NA	25.9365	26.3577	26.6243	26.6133	27.2543	26.8645	26.5807	25.3754	26.5248	27.0936
H0Y962;Q8N4T8;D6RAV8;D6RJF4;D6RGF2	NA	23.9268	23.8525	NA	NA	NA	23.8729	NA	NA	23.5753	23.7731	23.7127	23.9018	23.7304	23.6775	23.8111	23.8332	NA	NA	NA	NA	NA	NA	NA	NA	NA	NA	NA	NA	NA	NA	NA	NA	NA	NA	NA	NA	NA	NA	NA	NA	NA	NA	NA	NA	NA	NA	NA	NA
H0YAC1;P03952;E9PBC5	28.5072	30.0238	27.9142	29.0294	28.2065	28.4316	26.7887	27.6753	26.7642	28.9318	29.1556	27.0747	28.2282	28.0802	27.7642	29.2153	29.4731	26.9074	30.1272	29.844	27.0029	28.9856	26.9476	27.6185	29.0771	29.4914	29.5966	28.3801	21.5997	24.8369	26.2561	29.1049	27.3907	28.1371	26.1444	27.5842	28.2877	28.6806	26.5337	27.5749	28.541	28.8589	29.3782	28.3098	28.8743	27.7286	27.935	29.6446	28.8577
H0YB09;Q7Z3D6;A0A0C4DGD4;H0YB62	NA	NA	NA	24.642	NA	24.1435	NA	NA	NA	24.4024	NA	NA	23.941	23.7505	24.8156	24.4662	24.5654	24.634	NA	23.7894	24.5933	24.2473	NA	23.9365	NA	NA	NA	NA	24.6642	NA	25.167	NA	NA	24.2996	23.8224	23.5364	NA	NA	NA	NA	NA	23.63	NA	24.2439	23.9371	NA	24.8612	24.7039	25.1821
H0YBP1;E7ESA6;Q05397;E5RHD8;E5RI03;B4DWJ1;E9PEI4;H0YB16;H0YBZ1	NA	22.0871	NA	NA	NA	21.8302	21.9753	21.853	22.0537	NA	22.7016	21.8792	22.0969	21.7622	NA	NA	22.1999	NA	NA	NA	NA	NA	NA	NA	NA	NA	NA	NA	NA	NA	NA	NA	21.8971	NA	NA	NA	NA	NA	NA	NA	NA	NA	22.1676	22.0792	NA	21.7902	21.6869	NA	NA
H0YD13;P16070;H0Y2P0;H0YE40	28.2882	28.5944	27.6548	27.6799	27.9287	28.3891	27.5033	28.0203	27.7285	27.2514	27.7638	27.6617	27.8301	27.6271	27.2861	27.357	27.6471	28.849	29.1687	28.6207	28.6276	28.4443	29.3467	28.8331	28.7753	27.7396	28.3323	29.415	27.8636	29.4115	29.109	28.1141	27.6283	28.8033	27.3852	27.6406	27.7681	27.6981	27.4683	27.9289	27.3185	28.6011	28.9898	29.1387	27.6007	28.7893	29.1741	29.0802	28.9242
H0YDU8;P53041;A8MU39	26.33	25.603	26.361	26.3536	26.0662	26.6298	25.2334	26.1321	26.4984	26.3958	25.7224	26.3873	26.1023	26.4903	25.8575	25.8908	26.1328	26.4541	26.7221	26.6963	25.35	25.6549	26.3153	25.442	26.263	26.884	26.5765	26.9497	26.4143	26.4686	26.1124	26.7189	26.7672	26.0832	25.4714	25.9088	26.7988	26.6873	26.8991	26.234	26.6377	26.4533	26.7093	26.7693	27.1525	26.2494	27.0593	26.8946	26.1698
H0YF29;Q6P1X6	23.1098	NA	22.7313	23.7526	NA	NA	NA	23.2215	NA	23.9535	23.8705	23.7077	23.7736	24.3453	24.8794	23.9286	23.6369	NA	NA	NA	NA	NA	NA	NA	NA	NA	NA	NA	NA	NA	NA	NA	NA	NA	NA	NA	NA	NA	NA	NA	NA	NA	NA	NA	NA	NA	NA	NA	NA
H0YFD6;P40939;A0A2R8Y4F5;A0A2R8YG21	30.7552	30.7779	31.4351	31.1118	31.5949	30.7724	31.09	31.1064	31.6709	31.4772	30.9325	31.0266	30.8492	31.0159	31.7387	31.2456	30.9315	31.1691	30.2143	30.9539	31.1638	31.3498	31.1381	32.2607	30.999	31.4044	30.8836	30.7523	31.8078	31.733	31.8051	30.9665	31.2194	30.5095	31.0821	30.7134	31.1199	31.0264	31.0052	30.9718	31.4089	31.0235	30.2184	30.6214	31.1366	30.5616	31.3528	31.1905	31.1714
H0YG54;H0YGR4;Q9Y3B8;F5GYG5	25.5689	25.7283	25.5712	25.36	25.7431	NA	26.0659	NA	NA	25.592	25.6939	25.2348	25.9708	25.5886	25.5014	25.8368	25.7919	NA	NA	NA	NA	NA	NA	NA	NA	NA	NA	NA	NA	NA	NA	NA	NA	NA	NA	NA	NA	NA	NA	NA	NA	NA	NA	NA	NA	NA	NA	NA	NA
H0YHC3;F8W020;F8W118;F8VY35;F8VV59;B7Z9C2;F8W0J6;F5H4R6;H0YIV4;P55209;H0YH88;F8W543;F8VRJ2;F8VXI6;F8VUX1;F8VVB5	26.0431	24.1275	25.7843	26.1833	25.6809	25.4084	26.469	26.2425	25.4624	25.6682	25.2123	25.9456	25.6354	26.2097	25.8883	25.1297	25.3041	26.1016	26.2282	26.1672	26.1431	26.0816	26.3212	26.1328	25.7889	25.8446	25.7557	25.1034	25.9943	26.5613	25.9895	25.474	25.5215	25.9144	26.2721	26.0119	25.0007	25.2967	26.2865	NA	24.7285	26.3398	26.1709	26.3258	25.9048	25.8644	25.1861	26.1938	25.4263
H0YI09;Q9H8H3;F8VQX6	29.1779	28.9415	29.4949	29.2956	28.8893	29.2788	29.1103	28.5242	29.01	28.1466	28.3239	28.5231	28.1047	28.7418	28.7243	27.7568	27.9779	27.9455	27.9067	27.863	28.51	28.1845	28.3167	28.719	28.5508	27.6652	27.7131	NA	28.0546	27.2525	28.4795	27.4078	28.2061	28.7289	28.6432	28.2373	28.661	29.1489	28.2262	28.6268	28.0961	29.1693	28.1378	28.4854	28.3716	28.4931	28.6916	27.8503	28.7503
H0YKD8;P46779;H0YMF4;H0YLP6	27.406	27.0605	27.2804	27.2263	27.0203	26.9498	27.2565	27.1018	27.5512	24.2724	26.9024	26.8727	25.7184	26.413	26.7334	25.9774	24.6176	25.5571	NA	25.2264	26.6366	23.9373	27.7001	25.9057	24.4695	25.8593	26.3367	25.3923	26.7533	26.9194	26.2704	NA	27.7116	27.1881	27.5817	26.4266	26.9162	25.7805	28.1065	28.0279	28.0699	26.4536	26.9069	27.0974	26.4503	27.218	27.4056	27.3469	26.8021
H0YLW7;H0YMW8;H0YNF3;H0YMR6;H0YLE6;H0YL55;H7BXE3;Q9NWH9	NA	NA	NA	NA	NA	NA	NA	NA	NA	NA	NA	NA	NA	NA	NA	NA	NA	NA	NA	NA	NA	NA	NA	NA	NA	NA	NA	NA	NA	NA	NA	NA	26.7197	27.9548	27.2374	27.2118	27.2124	27.1332	26.7948	26.99	NA	26.071	27.0766	NA	27.0893	26.9979	26.4142	NA	NA
H0YMB3;H0YLV5;A0A087WWM4;F8WAN9;H0YNJ6;Q9P2T1	25.7346	26.1622	25.9246	25.6236	25.7287	26.1846	24.9485	24.8531	25.9193	25.1004	24.8985	24.7555	25.1312	25.3889	24.9523	25.5119	25.5029	25.135	26.0106	26.6251	25.33	26.0173	24.1061	25.7655	27.0793	25.8434	25.1611	26.6957	25.4045	25.0209	25.8052	26.3603	25.2568	24.7828	25.0154	24.7779	NA	25.7746	25.1605	25.1644	NA	25.3475	25.0216	25.5677	25.7734	26.0688	25.944	25.7803	25.5451
H0YN26;P39687	27.4635	27.5321	27.5158	26.4827	26.5859	26.346	26.5138	26.0921	26.0154	26.2903	26.5521	27.2405	26.4544	26.4099	26.7167	25.9499	26.2104	25.9706	26.8372	26.7232	26.8874	25.8984	26.4412	25.9382	26.1936	25.7776	26.9169	NA	26.7999	26.633	26.7998	26.4189	25.2617	25.6291	25.3337	25.9073	26.0907	26.1071	26.4639	26.1489	25.2042	26.5903	26.4882	25.743	26.2942	25.5657	24.7886	27.0708	25.9745
H0YNC7	27.4198	26.6845	26.6685	26.7203	27.2565	26.2972	25.2523	26.5365	26.5731	25.9011	NA	26.3335	NA	NA	28.0184	27.5533	27.4281	26.5815	27.2657	27.4165	26.158	29.6467	NA	27.5578	28.0467	26.5632	27.9552	29.4967	27.2665	26.3842	28.9429	27.9671	29.3295	28.8152	26.7568	NA	NA	NA	25.9608	27.2408	NA	27.2276	26.2258	29.1508	28.883	27.2538	29.2046	28.3007	NA
H0YNG3;P67812;H0YNX5;H0YNA5	25.8434	26.1108	25.7583	26.1157	25.5251	25.9242	25.9387	24.6314	NA	26.0911	26.2324	26.7045	26.5016	26.1774	25.9063	26.2132	26.004	26.0007	NA	NA	25.642	NA	26.5513	NA	24.8326	24.374	26.1347	NA	26.1673	24.7177	25.2355	NA	27.0917	26.7565	26.9644	26.9508	26.4662	26.5467	NA	27.1258	26.4701	25.6824	26.0067	25.8794	25.8809	26.3203	25.5123	25.7722	26.0828
H0YNH8;Q9BZF9;F5H2B9	26.6211	26.7567	26.5001	26.6213	26.3354	27.1366	26.5145	26.2899	26.4089	26.5475	26.3129	26.9475	26.199	26.9052	26.6247	26.3583	26.6484	26.5507	26.02	25.9883	26.6512	26.2371	26.6686	25.9738	25.5213	27.0653	26.913	26.4154	27.0444	26.7005	26.9122	26.5514	26.0439	25.6719	26.5495	27.0355	26.1955	27.0748	26.9878	26.73	26.4957	26.2343	26.953	27.1712	26.3884	26.4148	25.7945	26.2565	26.5676
H0YNX7;P30047	NA	NA	NA	NA	NA	NA	NA	NA	NA	NA	NA	NA	NA	NA	NA	NA	NA	NA	NA	NA	NA	NA	NA	NA	NA	NA	NA	NA	NA	NA	NA	NA	NA	NA	NA	NA	26.0376	NA	NA	25.264	NA	25.4768	25.9544	25.3086	25.1675	NA	NA	NA	25.3878
H3BM67;H3BUP2;H3BUN4;O60936	25.4016	25.6566	25.7145	25.4684	26.1588	25.1983	25.3246	25.6552	25.2968	25.1495	25.017	25.7037	24.8479	25.8759	25.3931	25.473	25.8096	NA	NA	NA	NA	NA	NA	NA	NA	NA	NA	NA	NA	NA	NA	NA	NA	NA	NA	NA	NA	NA	NA	NA	NA	NA	NA	NA	NA	NA	NA	NA	NA
H3BMM5;A0A2R8YF87;Q96AX1	NA	24.3803	25.1063	25.4099	25.2854	NA	25.4488	24.9274	24.8474	24.4183	NA	24.8134	NA	24.9079	25.1552	24.4784	NA	25.5046	24.9433	25.5673	25.3833	25.3542	NA	24.8343	24.3594	NA	NA	NA	25.5962	NA	NA	NA	NA	NA	NA	NA	NA	NA	NA	NA	NA	NA	NA	NA	NA	NA	NA	NA	NA
H3BN02;P20702	NA	NA	NA	NA	NA	NA	NA	NA	NA	NA	NA	NA	NA	NA	NA	NA	NA	25.9694	NA	26.3006	26.0302	NA	28.1209	23.176	NA	NA	22.8148	NA	NA	28.8823	NA	NA	NA	NA	NA	NA	NA	NA	NA	NA	NA	NA	NA	NA	NA	NA	NA	NA	NA
H3BN55;P51159;H3BUD9;H3BS49;H3BVH7	24.1264	NA	NA	23.8426	23.2337	NA	24.1204	23.2679	NA	NA	23.0153	NA	NA	23.5963	NA	23.6229	NA	23.3083	NA	NA	23.2221	23.3653	22.8443	NA	22.8107	NA	NA	NA	NA	NA	NA	NA	NA	NA	NA	NA	NA	NA	NA	NA	NA	NA	NA	NA	NA	NA	NA	NA	NA
H3BN98	26.5281	26.3742	26.3168	26.6108	26.5032	26.4053	26.0643	26.5602	NA	NA	25.9566	NA	25.2903	NA	NA	26.5696	26.7383	27.1557	25.6285	24.9866	26.9819	26.0698	26.5659	26.3344	26.4738	26.0468	25.7712	NA	26.0114	25.9894	25.5494	NA	26.3271	26.4563	25.5536	26.5957	26.7505	26.7228	NA	26.1646	26.788	25.7932	26.7203	25.2517	26.4376	26.0694	26.9673	25.905	25.6125
H3BNC9;P08708;H0YN88;A0A075B716	26.8543	27.2489	27.4291	26.7175	26.2832	26.3725	26.71	26.914	26.5417	26.8327	27.0621	27.2567	26.8593	26.8993	27.1821	27.111	27.1554	27.4414	26.5502	26.712	26.1474	26.3073	27.425	26.2113	25.5233	26.0244	26.7927	NA	26.9877	27.6337	27.2398	25.9525	27.9374	27.0681	27.2702	27.2051	27.0218	27.1887	26.3649	27.2299	27.1318	27.4375	27.0394	26.8905	26.0971	26.3487	27.3391	26.976	27.1768
H3BP77;O00142;A0A0A0MSY7;J3KS73;J3QRP0	NA	NA	NA	NA	NA	NA	NA	NA	NA	NA	NA	NA	NA	NA	NA	NA	NA	NA	NA	NA	NA	NA	NA	NA	NA	NA	NA	NA	NA	NA	NA	NA	NA	23.9348	NA	NA	24.9585	NA	24.7018	NA	NA	23.8823	NA	24.0453	24.3206	24.9376	NA	NA	NA
H3BPE1;H3BQK9;Q9UPN3;H0Y390	26.6775	27.1033	26.7541	26.7912	26.1671	27.1763	26.6632	26.6252	26.7008	26.8744	26.1583	26.5962	26.3099	26.8775	26.7531	26.4995	26.357	26.7158	25.9353	26.4643	27.4155	26.4805	27.8439	26.852	26.0005	27.207	26.2124	25.0348	26.8243	28.0113	26.9956	NA	25.5533	26.4762	26.5674	27.2707	25.9715	27.3957	26.8492	26.7812	26.3156	26.9875	25.234	27.2136	26.8201	26.5721	26.0413	25.4123	26.4849
H3BPE7;P35637	24.7869	25.1708	NA	24.5212	24.8494	24.7961	24.4769	24.8133	24.857	23.8122	24.4538	24.1718	24.4313	24.6999	25.0077	24.7048	24.6827	25.2797	NA	NA	24.93	NA	24.4676	NA	NA	23.9448	NA	NA	25.0442	25.5474	25.2611	26.2925	NA	NA	NA	NA	NA	NA	NA	NA	NA	NA	NA	NA	NA	NA	NA	NA	NA
H3BPK3;Q16775;H3BPQ4	27.1679	27.3002	27.2647	26.8946	27.0154	27.2677	26.9963	26.7144	27.9243	26.2089	26.3911	26.0654	26.2034	27.3141	27.0757	27.349	27.6469	26.5147	29.1559	29.1152	26.4826	26.9672	26.2024	26.3783	28.2451	27.3548	28.2324	28.4045	26.8269	26.2104	26.9837	27.9463	NA	NA	26.2803	26.6962	NA	NA	NA	NA	NA	26.1082	27.5373	26.0335	27.0483	27.1689	26.2332	NA	26.3097
H3BQQ9;B0QYN7;P63279;H3BPC4	26.3462	26.3712	26.469	26.0216	26.0804	25.9683	26.3585	26.4387	26.4617	25.8108	26.0125	26.4833	25.8253	26.1714	26.2522	25.994	25.9524	NA	NA	NA	NA	NA	NA	NA	NA	NA	NA	NA	NA	NA	NA	NA	NA	NA	NA	NA	25.6193	NA	NA	26.1152	25.7598	26.2674	26.079	26.364	NA	25.8949	26.0357	24.8407	26.4916
H3BR35;P15170	25.6121	26.0529	25.9811	26.2204	26.151	25.8202	26.0889	25.0184	25.9815	24.5023	24.9273	24.8946	25.422	25.3192	24.7943	24.8098	25.0204	NA	24.7831	26.1016	24.7865	24.3931	NA	NA	NA	25.1718	25.4021	NA	25.0766	25.6501	24.3374	25.3779	NA	25.3347	25.2341	25.024	25.6619	25.2978	25.1378	NA	25.8412	24.7369	25.585	24.945	25.0022	NA	NA	NA	NA
H3BRU6;F8VZX2;Q15366;F8W0G4;F8VXH9	26.8774	27.5228	27.0146	27.759	26.7451	27.7607	26.7937	26.9259	27.1348	26.2268	26.3873	26.6363	27.0973	27.4524	26.9577	27.0474	26.8237	27.4735	27.6965	27.615	27.5978	27.9134	27.9183	27.326	27.447	26.5892	26.8147	26.6293	27.2249	27.2551	27.0659	26.8221	NA	NA	26.2282	NA	NA	NA	27.5314	27.1743	26.1669	26.511	26.204	26.6609	26.5681	26.0564	26.1991	26.3561	25.5647
H3BS10;H3BP20;P06865;H3BU85;H3BTD4	25.7581	26.3633	25.0191	25.3527	25.894	26.4841	25.52	24.7559	25.9421	24.411	24.3155	25.1309	24.885	24.9716	25.672	25.5115	25.3857	25.7872	26.3304	26.1266	25.7857	25.6224	25.7693	NA	25.7328	25.6602	25.5755	26.4208	25.7486	26.5558	26.7189	25.2588	24.7723	26.5373	27.1341	28.0988	26.069	26.0864	26.8454	25.7606	25.996	25.599	26.1576	25.8961	NA	26.3806	25.362	25.4046	26.0621
H3BSW0;A0A3B3ISV5;Q8N9N7	24.7774	25.1916	25.1935	24.9559	25.235	25.3156	25.0342	25.6707	25.8755	25.4639	25.5963	25.5252	25.1335	25.3668	25.302	25.3031	25.5735	25.4794	25.0621	25.2371	25.2919	NA	24.7181	24.5976	25.3687	25.0655	25.1214	NA	25.4937	25.2438	24.7885	NA	NA	NA	NA	22.5983	NA	25.067	NA	NA	25.5531	24.7972	23.179	25.0568	24.9438	24.4124	24.4126	NA	24.6088
H3BT71;P38159;H0Y6E7;H3BR27;A0A1B0GUK8;Q96E39	28.3398	28.1445	27.4977	28.7998	27.7729	28.0917	28.0473	27.3348	27.3801	27.5602	26.5886	28.1414	28.2957	27.5021	27.659	27.8313	28.0623	27.4438	26.3634	NA	27.4875	27.4925	26.8498	27.6023	25.75	27.1936	26.5869	28.46	27.9568	27.4414	28.2303	27.6317	28.3103	28.0649	28.0107	27.969	28.1137	28.0742	26.8459	28.3705	27.6405	27.9827	28.2983	27.9772	27.284	28.1229	27.7973	28.3513	27.3201
H3BUD2;H3BS05;H3BR94;Q9BTE1	NA	22.8253	NA	22.7991	22.9501	22.6696	22.8313	NA	NA	NA	NA	NA	NA	NA	NA	NA	NA	NA	NA	NA	NA	NA	NA	NA	NA	NA	NA	NA	NA	NA	NA	NA	NA	NA	NA	NA	NA	NA	NA	NA	NA	NA	NA	NA	NA	NA	NA	NA	NA
H7BXI1;A0A087WXU3;A0FGR8	27.6464	27.5003	27.6413	27.7674	27.4447	27.3821	27.2647	27.4682	27.3106	27.2252	27.9148	27.6078	27.6537	27.1859	26.8899	27.5211	27.3203	26.5021	27.0605	27.2247	27.2281	27.2504	26.6663	26.7664	27.0278	27.7537	27.4686	27.4616	27.4159	26.8249	27.2945	27.6986	27.2943	27.5859	27.237	26.8839	27.4655	27.1987	26.8689	27.7417	27.3306	27.757	27.5328	27.2214	27.3263	27.6315	26.4522	27.2486	27.3292
H7C1N3;O15155;A0A3B3IU16;C9JTT8;Q68DU7	NA	NA	NA	NA	NA	NA	NA	NA	NA	NA	NA	NA	NA	NA	NA	NA	NA	NA	NA	NA	NA	NA	NA	NA	NA	NA	NA	NA	NA	NA	NA	NA	NA	NA	NA	NA	NA	NA	NA	NA	NA	24.2203	NA	NA	NA	24.5728	24.4448	24.7049	24.4826
H7C1U8;Q9BUR5;A0A0J9YWW6;G3V1B6	24.5689	24.3815	24.5417	24.9421	24.7682	NA	25.0994	24.7362	25.0796	24.9813	25.001	24.6573	25.7752	24.6702	25.1811	25.1619	25.149	24.853	24.5526	23.7946	24.5155	24.6942	24.4951	NA	24.6484	NA	24.6633	NA	25.4684	24.5815	24.4886	NA	26.0508	25.4993	25.4887	25.2241	NA	NA	23.871	NA	NA	24.6281	24.579	NA	24.4946	24.8784	NA	24.9516	NA
H7C2W9;C9JU56;B7Z4E3;B7Z4C8;P62899;B8ZZK4	NA	26.4945	NA	NA	25.0258	NA	26.0792	26.4178	NA	26.6741	27.2095	25.5085	25.399	26.1104	26.4435	25.5996	25.6618	NA	NA	NA	NA	NA	NA	NA	NA	NA	NA	NA	NA	NA	NA	NA	25.6204	27.2765	NA	NA	NA	NA	26.0088	25.8576	26.0169	27.3609	26.8241	NA	26.6183	26.7579	26.7546	26.6994	NA
H7C2Z6;H7BXD5;P28676	25.2558	24.9573	NA	24.9611	23.9944	24.6544	24.9589	24.8838	25.1908	24.4889	NA	24.7721	25.3318	25.2504	24.8665	24.3132	25.0361	25.4793	25.576	25.5596	25.1236	NA	25.6794	NA	25.2066	NA	24.5517	NA	24.2616	25.2805	NA	NA	NA	NA	NA	24.9714	NA	NA	NA	NA	25.4915	24.9338	24.6584	24.9952	25.3455	24.9404	24.4243	NA	24.9118
H7C3P4;F6S8M0;P15586;H0YFA9;F5H4C6	26.1276	26.1282	25.9824	26.1587	26.4771	26.4059	26.0424	25.8503	NA	25.6027	25.8142	26.4255	25.9458	26.4213	25.2454	25.2004	24.9216	25.7357	25.2126	NA	25.9088	25.6371	25.8815	25.8059	25.0284	26.0544	26.2707	26.964	26.0486	26.3356	26.053	NA	26.3623	26.0493	25.7781	25.2297	27.0966	26.178	26.3854	26.4602	NA	25.9395	25.5248	25.6973	25.6895	25.524	25.8913	25.32	25.2668
H7C4M9;C9JZG9;C9JZY6;P62256;C9J8Q9	NA	24.4234	24.2396	NA	24.8108	24.7321	25.4419	24.9359	25.1429	24.2685	24.0462	24.4061	24.5077	24.8258	24.4772	NA	23.7637	24.2924	23.7207	NA	23.9309	NA	23.9809	NA	NA	23.9048	NA	NA	24.1574	23.7073	23.5873	23.7256	24.4017	24.3257	24.373	24.7483	NA	NA	24.0333	24.2593	NA	23.4448	NA	NA	NA	24.0031	23.6956	NA	NA
H9KV28;A0A2R8Y5N1;A0A140T8Z0;A0A0G2JH68;O60610	24.7089	24.0037	24.0797	NA	NA	NA	NA	22.611	24.5885	24.6534	24.2388	23.8292	24.3943	24.1032	24.146	23.6145	25.1702	25.606	25.8689	26.4301	25.5484	24.5444	25.6396	24.22	NA	24.44	24.9199	NA	24.1493	26.0171	23.2823	25.3672	23.2728	24.5935	24.3367	NA	NA	NA	24.591	23.4118	23.9647	23.45	24.5251	24.0133	23.5329	23.2457	24.2044	NA	23.577
H9KV75	23.0686	23.1851	23.3504	23.5897	24.21	23.8449	NA	NA	NA	23.7907	24.4845	24.2232	NA	25.3618	25.0479	24.3066	24.2934	24.105	NA	24.3117	24.7949	NA	22.8057	23.8366	23.7277	23.5102	24.1204	NA	23.4778	NA	23.8871	NA	NA	NA	23.0662	23.8508	25.1764	NA	23.3554	24.3405	25.0068	23.9649	23.6029	25.5316	23.9339	NA	24.7207	24.271	23.5803
I3L0H8;Q9NUU7;I3L352	NA	NA	NA	NA	NA	NA	23.4057	22.5874	NA	22.7533	23.7546	23.7697	24.4509	NA	22.7288	22.6841	NA	NA	NA	NA	NA	NA	NA	NA	NA	NA	NA	NA	NA	NA	NA	NA	NA	NA	NA	NA	NA	NA	NA	NA	NA	NA	NA	NA	NA	NA	NA	NA	NA
I3L0N3;P46459	26.2997	25.483	26.3305	26.575	26.4359	26.1548	26.3488	26.2052	26.3562	26.3571	26.1856	26.4087	26.1971	26.018	24.9238	25.1593	25.3603	25.9992	25.8728	26.2177	26.0829	26.7609	26.409	26.3008	26.8449	26.5852	25.9826	NA	26.0908	26.3054	25.7476	27.0836	25.3586	24.2183	25.2966	24.8103	25.5489	24.9095	25.681	25.7175	25.8612	25.3298	24.6769	25.6082	24.4644	24.2992	24.8341	24.4956	25.408
I3L145;P04278;I3L1J1;B4DYU0;A0A0C4DGN2;I3L2X4;I3L4B9;I3L2F1;B0FWH6;B0FWH5	NA	21.683	NA	NA	NA	NA	NA	NA	NA	22.6114	23.377	22.2484	22.933	NA	22.9945	25.6259	22.4998	NA	NA	NA	NA	NA	NA	NA	NA	NA	NA	NA	NA	NA	NA	NA	NA	NA	NA	NA	NA	NA	NA	NA	NA	NA	NA	NA	NA	NA	NA	NA	NA
I3L1P8;Q02978	28.6335	28.4457	28.3301	28.5355	28.5243	28.0585	27.888	27.6857	28.1542	28.1498	28.0536	27.8565	28.4943	27.6171	28.044	27.7246	27.7128	27.2637	28.0475	27.1814	28.7478	28.0189	27.8376	27.6852	28.3544	28.0678	28.0297	26.6758	28.4412	27.4632	28.6175	27.5926	28.01	28.1637	27.4802	28.1037	27.4622	27.7752	27.7129	28.1402	27.5475	27.8289	26.3107	26.8707	28.1017	27.3694	28.8694	26.2258	27.5926
I3L397;I3L504;P63241;Q6IS14;F8WCJ1;C9J7B5;C9J4W5;Q9GZV4	27.6321	28.0507	27.1099	28.1052	27.8315	28.1875	27.8707	28.0745	28.6911	28.465	28.5534	27.8316	26.7107	28.0083	27.7596	28.3746	28.3117	28.7154	28.94	28.8474	28.7474	28.8635	28.8924	28.8765	29.1827	28.6075	28.4307	28.1454	28.2637	28.7764	28.497	28.8086	27.9325	27.7402	28.5111	28.4736	27.42	27.5725	28.0344	27.6592	27.5465	28.1023	27.4564	28.6425	27.4919	27.8075	28.0368	27.1627	28.4496
I3L3P7;P62244;I3L246	27.0454	28.1398	26.9959	26.3623	27.4855	27.8903	28.8531	27.9517	28.2752	27.3205	28.0777	28.3247	27.6121	27.7027	28.2579	27.6778	27.2913	28.1478	26.8536	26.6863	27.7196	27.4115	27.8598	28.0312	26.3756	27.8349	28.1391	27.1951	28.6507	28.9187	28.7509	27.1159	27.6086	26.5977	27.5513	28.4461	26.4041	26.797	26.1867	26.8517	27.6225	28.7473	27.4395	27.8182	26.7427	28.8608	28.633	29.1744	28.8305
I3L4N6;Q9UP95	24.517	NA	NA	25.7399	NA	25.6485	25.4371	NA	26.6528	25.4436	25.503	NA	26.6369	25.4153	24.8913	25.8725	25.8307	24.6404	NA	28.6379	NA	25.2879	24.8317	NA	NA	27.1987	NA	28.1838	24.4579	25.8829	24.5015	27.637	NA	NA	NA	25.4355	NA	24.8149	NA	NA	NA	NA	NA	24.1931	26.5609	24.1492	25.6027	NA	24.678
I6L894;Q01484;E9PCH6;H0Y931	25.4606	25.468	25.528	NA	24.962	24.8683	25.4456	25.4168	24.9101	24.7632	25.0902	25.0375	25.1736	24.5239	25.078	25.5905	25.3166	25.8001	27.2973	25.8756	26.0037	25.8049	26.3667	26.1716	25.1031	25.2663	25.6512	26.5435	25.861	26.0168	25.3571	25.3642	25.2536	25.5152	25.7545	24.0114	24.8386	24.797	25.6785	26.1928	26.357	25.9469	25.4287	25.5164	25.7622	24.7233	24.2384	24.779	NA
J3KMX1;Q99567	NA	NA	23.4751	NA	NA	NA	23.2766	NA	NA	NA	23.1066	23.1438	22.9394	23.3902	23.0628	NA	NA	NA	NA	NA	NA	NA	NA	NA	NA	NA	NA	NA	NA	NA	NA	NA	NA	NA	NA	NA	NA	NA	NA	NA	NA	NA	NA	NA	NA	NA	NA	NA	NA
J3KMY5;G3V3E8;E7EMS2;G3V3D1;P61916;G3V2V8;H0YIZ1	25.7541	26.784	26.1174	26.1791	24.9952	25.555	NA	NA	25.5736	26.1775	25.7751	26.5144	26.0287	26.2079	26.4019	25.9811	26.2444	26.9478	26.1146	27.4824	26.8887	25.9585	27.7028	NA	NA	25.5612	NA	26.1385	NA	27.3252	NA	NA	27.5597	NA	25.5264	25.9798	NA	25.5999	25.7237	25.6955	26.7863	24.8374	25.4282	25.9163	NA	NA	NA	NA	25.4222
J3KN29;O00233;F5H5V4;F5GX23;F5H169	26.8892	26.676	27.0274	26.9068	26.731	27.0254	25.4736	26.8565	26.9993	26.3949	25.6614	26.0756	26.7593	26.934	26.9564	27.412	27.5387	26.4757	28.6011	28.2777	27.0402	27.718	27.0854	26.3184	27.8317	27.7549	27.8755	26.7699	27.0994	26.0489	26.6964	27.4351	26.7566	26.6003	24.659	25.1578	26.0961	26.7404	26.2963	24.8072	NA	26.7283	26.8316	26.351	27.1104	26.706	27.0844	25.8192	26.6353
J3KNB4;P49913	26.1154	NA	NA	24.6795	23.2004	23.6163	NA	NA	25.7063	23.538	22.913	NA	25.4623	25.5143	23.2559	23.9697	24.9531	22.8863	25.1336	NA	23.77	24.5813	24.1337	NA	NA	NA	NA	NA	NA	NA	24.112	NA	NA	NA	NA	NA	NA	NA	NA	NA	NA	NA	NA	NA	NA	NA	NA	NA	NA
J3KNF4;O14618;E9PP76	24.3322	NA	NA	23.9608	25.0254	NA	23.8629	24.335	24.6133	NA	25.5438	NA	25.3698	25.4648	24.1295	24.7229	25.0105	25.2998	27.2635	27.4511	24.4821	25.7543	NA	25.1631	26.4523	25.6026	26.8236	26.399	24.3935	24.2427	NA	26.1295	25.2986	24.8974	24.6267	25.2406	24.4513	25.4214	24.9847	23.7488	24.8179	25.2941	24.8805	24.7805	25.3707	25.2548	25.6099	24.9801	25.0999
J3KNF8;H3BUX2;O43169;D6RFH4	26.4223	26.0957	26.6015	26.6111	27.0792	27.022	26.6294	27.4615	28.02	26.8379	27.218	26.3076	26.6081	26.6538	26.7448	27.0647	26.8553	26.9289	25.9959	NA	26.5776	26.3388	25.6766	26.7387	25.8504	26.7803	27.2008	27.2135	27.2552	26.5412	26.4688	26.9216	26.7207	26.9268	26.75	27.449	26.8968	NA	26.3465	NA	26.881	26.5266	27.4403	25.3279	NA	26.1891	26.8263	26.0139	26.1301
J3KNQ4;Q9NVD7;E9PS97	29.301	29.543	29.7943	29.4157	29.4891	29.0193	29.3885	29.617	29.6366	29.8472	30.2443	30.0515	29.7912	29.8601	29.5526	29.8945	29.6313	29.0976	28.2981	29.0902	29.3035	29.3995	28.8161	29.4967	29.4557	30.1006	30.1115	29.6137	29.5058	29.2641	29.5828	30.2092	30.1941	29.2355	29.5807	29.6743	29.8657	29.0899	29.4716	29.6992	29.3817	29.5106	29.6976	29.2204	29.528	29.9246	29.2654	29.319	29.0618
J3KNW4;A0A0A0MSG2;Q14192	NA	24.3231	24.4237	NA	23.344	23.0369	23.9243	NA	NA	NA	NA	24.3328	NA	NA	24.5606	NA	NA	23.6911	NA	NA	23.6843	24.4718	23.9078	24.1334	24.7145	NA	NA	NA	NA	NA	NA	NA	NA	NA	NA	NA	NA	NA	NA	NA	NA	NA	NA	NA	NA	NA	NA	NA	NA
J3KQ32;Q9NTK5	27.1429	27.6469	27.5516	27.371	27.2383	26.6237	27.4127	27.3392	27.2442	27.5189	27.7547	27.5937	27.4984	27.4291	27.3376	27.5667	27.8202	27.4197	28.4262	28.4997	27.2218	27.7396	27.468	27.1943	27.7888	27.0109	28.4453	27.3707	27.6883	27.5519	26.6106	27.9535	26.2346	26.7119	27.319	27.4465	NA	25.8384	27.429	24.8913	27.7486	27.3648	27.4035	27.2262	27.5048	27.339	26.5976	26.7246	26.8258
J3KQJ1;Q8NBJ7;C9JL30;C9J660;H7C3B2;A8MXB9;F8WA42;E9PBT8	25.149	25.2555	25.29	25.1333	25.0277	25.0597	25.1451	25.0361	22.9576	24.6026	25.6132	25.8083	25.3227	25.1623	25.0148	25.2221	25.095	25.2864	24.7053	25.6106	26.1925	25.7394	25.8657	25.8085	25.6462	25.8049	25.6092	26.543	24.9855	25.6024	25.3923	25.9131	24.905	24.7704	24.7582	25.3805	23.1471	24.9894	25.404	25.207	NA	25.493	25.3813	24.9088	24.3662	25.3927	25.2053	25.4486	25.064
J3KQL8;Q9BQE5	26.4266	26.2496	26.1867	26.3817	25.6955	26.422	26.624	26.0242	25.5093	25.8919	25.9372	26.2838	26.5059	25.9324	26.374	25.7555	26.4738	26.607	25.4023	25.8315	26.0235	26.4619	25.841	25.9028	26.1066	26.6427	26.94	27.1062	26.4775	26.826	26.325	26.6811	27.049	26.4088	26.194	26.2029	26.7494	26.3279	26.629	25.0252	26.4346	26.0692	26.5427	26.2425	25.7578	26.2111	27.0184	25.8743	26.2142
J3KR44;Q96FW1;F5GYN4;F5H6Q1;F5GYJ8;F5H3F0	26.3239	26.2582	26.4198	26.8529	26.96	27.318	26.8043	26.4179	27.0677	27.0432	27.1559	26.8913	26.7878	26.6151	26.204	26.4901	26.4215	26.597	26.8072	27.2477	26.5776	26.6655	26.6833	27.0415	27.3063	27.3094	27.1552	27.247	26.686	26.5885	27.0322	27.2028	27.2512	27.019	26.6652	26.9414	26.7814	26.7602	26.9844	26.8671	NA	26.3765	26.6241	26.4376	26.4629	26.9376	26.027	26.0311	27.5271
J3KR97;Q9BTW9;I3L439	25.1531	NA	25.2431	NA	24.4771	NA	24.8789	24.6521	NA	24.9221	24.5342	24.9183	NA	24.7696	24.2722	24.9597	24.687	25.8746	25.3036	NA	25.0316	25.2627	24.7221	24.9102	24.9778	25.1648	24.5702	NA	24.5691	24.8827	24.9036	NA	25.207	25.3385	25.0957	NA	24.9143	NA	25.3574	25.0359	25.2295	25.1526	24.6088	24.9214	25.2125	25.5646	24.6116	24.6461	24.8757
J3KS22;Q7Z4W1;J3QS36;J3KRZ4;J3QL34;J3QS45;J3KSZ5	28.2274	28.1044	28.7896	28.3328	28.6822	28.1764	28.6269	28.1893	29.0549	28.3783	28.4577	28.5356	28.7222	28.4426	29.0239	28.5184	28.575	28.4714	27.9293	28.1107	27.805	27.7841	26.9536	27.9814	28.8192	28.3418	28.2136	27.5951	28.3894	27.3108	28.6114	27.4178	27.7579	26.0774	25.862	26.8424	28.1632	26.5288	26.9357	28.4917	29.2224	28.0157	28.3404	27.6488	28.799	28.4231	28.7938	27.9552	28.0892
J3KSJ8;Q9UD71	NA	NA	NA	NA	23.3968	NA	NA	NA	NA	23.4094	25.6632	23.3277	25.5327	NA	NA	25.0896	23.7474	NA	NA	NA	NA	NA	NA	NA	NA	NA	NA	NA	NA	NA	NA	NA	NA	NA	NA	NA	NA	NA	NA	NA	NA	NA	NA	NA	NA	NA	NA	NA	NA
J3KTA4;P17844	NA	24.1948	24.0231	24.0639	23.6822	23.9406	24.6909	24.7726	24.2156	NA	NA	24.4836	24.2789	24.6529	24.6399	23.8048	NA	25.1692	25.2348	26.1011	25.1865	25.4265	26.306	25.6593	24.493	24.909	NA	NA	24.8839	26.2657	25.2126	NA	24.1945	25.2905	NA	24.8763	25.0728	24.2713	24.6057	24.4626	NA	NA	23.1423	NA	NA	24.2943	NA	24.1376	23.6917
J3KTF8;J3QQX2;P52565;J3KRE2;J3KRY1	29.0361	28.9645	29.101	29.0593	29.106	29.3394	29.789	29.3068	29.9869	29.3565	29.7046	28.9189	29.1492	28.9004	28.9927	28.9412	28.8754	29.5629	29.2051	28.8398	29.3987	29.4231	29.4773	29.5112	29.9581	29.7337	29.3692	29.693	29.7481	29.1997	28.9412	29.1174	29.8153	29.203	28.7425	28.3477	28.0309	29.2195	28.7659	28.3798	27.9573	29.5975	29.2167	29.375	29.6236	29.6735	29.3671	28.7437	29.4215
J3KTL2;Q07955	26.663	26.4557	25.6594	26.2992	25.5547	25.9694	25.8384	25.5509	25.1804	25.4221	25.8451	26.0503	26.5563	25.5798	25.6076	26.0252	26.0531	25.8637	NA	25.1542	25.6567	26.0349	25.969	26.4225	25.8924	25.9864	25.95	NA	26.1127	26.528	27.1084	25.5967	27.3773	26.8618	25.8677	26.3501	26.6574	26.6409	26.2393	26.7088	25.2292	26.535	26.6682	26.7336	26.3381	26.35	27.539	27.1767	26.6228
J3QL05;J3KP15;Q01130	26.7337	27.3389	25.7475	NA	25.8902	26.2978	26.1942	24.9246	NA	25.2368	25.5861	26.0937	26.1351	25.1658	26.1471	25.7301	26.1662	25.9357	NA	NA	25.3238	25.2528	25.5352	26.4082	NA	NA	NA	26.8963	24.9421	26.4952	26.0761	26.0742	26.2625	26.0741	NA	25.1602	25.7642	25.9145	26.0799	26.254	NA	25.7322	26.2134	25.3176	25.1829	25.1515	27.1004	26.4777	26.1129
J3QL14;R4GN72;F5GYQ1;P61421	23.8281	22.3348	22.8806	22.4152	NA	NA	23.5981	22.8256	23.2671	NA	22.4808	23.4562	22.7279	23.6448	23.821	23.7187	22.9195	NA	NA	NA	NA	NA	NA	NA	NA	NA	NA	NA	NA	NA	NA	NA	NA	NA	NA	NA	NA	NA	23.489	NA	NA	23.7138	22.8013	22.8077	23.8163	23.2785	23.211	NA	NA
J3QL56;O75880	25.9065	NA	NA	25.8572	26.0788	25.591	25.0843	25.7204	NA	25.2397	25.2699	24.7923	25.2034	24.2515	25.2283	25.8748	NA	23.8441	25.2294	25.624	25.9209	25.384	25.632	NA	26.6033	25.7995	25.8381	25.3879	26.1321	25.6476	26.3885	26.4662	24.4792	NA	NA	24.4892	NA	26.0109	NA	NA	NA	26.006	NA	25.2538	25.8762	25.8533	26.5343	NA	25.6964
J3QL71;Q96FV2;J3QRJ1	27.6302	27.9224	28.2016	27.6369	27.6569	28.0697	26.835	27.8741	27.6933	28.314	28.8584	28.2745	28.0555	28.2932	28.3235	28.1981	28.8693	28.5054	27.5401	27.9679	27.8675	27.8311	25.9864	28.062	28.0429	28.971	28.8006	28.3034	28.0977	27.4824	28.68	28.3932	28.1507	27.4449	27.9688	27.6507	26.1424	27.8185	26.9219	27.4797	26.7645	28.4918	28.7489	28.1332	28.6362	28.5363	28.5635	27.7534	28.7281
J3QLD9;E7EMK3;Q14254	27.3141	26.0733	27.2962	27.1335	26.6426	27.3256	27.3393	26.7794	27.1807	24.651	25.3585	25.714	25.9745	25.6668	25.5442	26.2617	25.8907	23.4913	26.6387	27.5424	25.2547	25.7415	25.1105	24.8314	25.5873	26.8177	27.2993	26.9372	24.5686	26.7343	26.8142	28.1309	26.1789	26.3713	26.4332	26.4743	26.3811	25.8586	25.4146	25.8932	26.2829	26.599	26.2476	26.23	26.0922	25.6299	26.9205	26.0718	26.2245
J3QLR8;Q9Y3D9	22.9367	23.0216	22.4419	22.8306	22.3716	22.5181	22.9248	22.8517	NA	23.0537	23.2219	22.9721	23.2291	22.8057	23.2295	23.1325	23.1531	NA	NA	NA	NA	NA	NA	NA	NA	NA	NA	NA	NA	NA	NA	NA	NA	NA	NA	NA	NA	NA	NA	NA	NA	NA	NA	NA	NA	NA	NA	NA	NA
J3QQY2;J9JIE6;Q9UM00;J3KS45	24.0214	24.363	23.7385	24.8479	24.7463	24.5656	25.4123	24.5077	NA	NA	23.7328	NA	NA	23.9288	23.3791	24.3738	23.4151	NA	NA	NA	NA	NA	NA	NA	NA	NA	NA	NA	NA	NA	NA	NA	NA	NA	NA	NA	NA	NA	NA	NA	NA	NA	NA	NA	NA	NA	NA	NA	NA
J3QQZ9;Q9NVS9;J3QQV6	25.8393	NA	NA	26.0849	26.2011	25.9502	25.7362	26.3455	26.7038	25.7721	25.6031	25.703	25.3336	26.2366	NA	25.7946	NA	25.9053	26.1703	26.3837	25.6341	25.6777	25.2096	26.428	26.9222	26.0059	26.0946	26.6024	25.9923	25.2256	24.8486	NA	26.462	NA	26.0554	26.6723	NA	NA	26.1925	NA	NA	26.2912	26.1257	26.1831	26.1204	26.6778	25.7121	25.9048	25.6637
J3QR09;J3KTE4;P84098	24.8422	NA	24.7963	25.0863	26.3303	NA	25.7908	25.0991	NA	NA	25.572	25.7109	25.4222	24.4458	25.2954	24.7964	25.5354	NA	NA	NA	NA	NA	NA	NA	NA	NA	NA	NA	NA	NA	NA	NA	24.8793	25.4096	23.9067	24.6913	25.6998	NA	NA	NA	NA	26.6083	25.4905	27.0921	25.9682	26.9394	27.7075	27.1303	26.5269
J3QRS3;P19105;O14950	28.2492	27.7632	28.4047	27.7467	28.6892	28.5531	28.7957	28.7652	28.2594	28.472	28.4194	28.8204	28.5883	27.941	29.1119	28.6177	27.6979	29.0942	28.2443	29.2286	28.811	29.3839	28.9545	28.9707	28.5402	28.3843	27.9613	29.4393	29.0992	29.2525	29.2172	28.8704	30.0349	29.0866	29.4684	28.4745	28.9223	28.4957	28.7855	28.9888	28.4936	28.692	28.5109	29.5749	28.1437	29.06	28.3372	29.1076	28.7073
J3QRU1;P07947	24.9639	26.5673	NA	25.055	25.2932	26.4101	25.4498	25.7316	26.8517	25.7926	25.4277	25.0283	25.1694	25.6888	24.9645	25.6465	24.7048	25.3957	NA	25.3776	25.2711	25.6996	25.8265	25.4947	25.3826	25.7268	25.3385	NA	25.4908	25.2848	25.7394	NA	25.8631	NA	25.1666	25.4009	26.0011	NA	25.7223	25.913	25.4232	24.8741	24.9159	25.1483	25.6699	25.4143	25.083	24.9974	25.0207
J3QS48;I3L295;J3KT75;J3QW43;J3QRD5;O75352;J3KSI4;I3L1D2;I3L4E0;J3KTK8;J3QQZ4	26.6232	25.7195	26.4085	26.9339	26.3784	26.855	26.1548	26.8518	NA	23.8732	24.7581	NA	25.0016	NA	24.141	24.5086	NA	NA	NA	NA	NA	NA	NA	NA	NA	NA	NA	NA	NA	NA	NA	NA	NA	NA	25.2849	25.751	25.6177	NA	NA	NA	NA	NA	NA	25.4173	25.59	NA	26.0313	25.0418	25.2357
J3QTS8;Q15661;P20231;A0A087WUI4;A0A087X1U0;A0A0C4DGM1	29.3274	30.6111	28.2588	30.2807	29.8404	30.6074	29.0728	28.9979	29.9829	27.7926	29.0844	29.001	29.0383	30.6578	28.7407	28.0875	28.7954	31.2139	32.3773	30.5173	30.9392	30.3201	30.7212	30.2361	31.8278	28.2553	30.4511	30.7436	30.1249	30.7239	31.4117	30.7502	29.2794	31.0408	28.766	30.5588	29.9247	31.0278	29.4521	29.1946	28.282	29.274	30.8849	30.361	30.0191	31.6946	29.866	29.42	31.649
K4DI93;Q13620	22.6739	NA	22.2161	NA	22.0497	NA	22.4303	NA	NA	22.7207	22.5144	22.2308	22.4353	22.1129	22.1957	NA	22.1295	NA	NA	NA	NA	NA	NA	NA	NA	NA	NA	NA	NA	NA	NA	NA	NA	NA	NA	NA	NA	NA	NA	NA	NA	NA	NA	NA	NA	NA	NA	NA	NA
K4DIA7;P48509;E9PMR4;E9PRJ3	29.585	29.1024	29.6212	29.6717	29.3281	29.6024	28.5302	28.8004	29.3803	27.2747	27.9655	28.2581	27.7373	27.1218	27.516	27.8666	27.5975	26.0903	26.7649	26.7439	26.387	26.3196	NA	25.5568	NA	28.2337	27.9869	NA	NA	27.9735	28.2973	28.1981	29.2769	28.6056	27.8899	28.5067	29.77	29.6827	27.593	28.985	29.3143	29.0487	27.3779	27.8952	27.9226	28.8079	28.467	27.9036	28.3562
K7EIG1;O75153;I3L2B0	23.8322	24.1822	24.1923	24.0301	23.9635	24.6238	24.2938	NA	NA	23.835	23.3206	24.0958	24.105	23.9005	24.2271	23.9115	24.4151	NA	NA	NA	NA	NA	NA	NA	NA	NA	NA	NA	NA	NA	NA	NA	NA	NA	NA	NA	NA	NA	NA	NA	NA	NA	NA	NA	NA	NA	NA	NA	NA
K7EIJ0;K7ENL2;A6NG10;K7EMC9;Q969T9;K7EIN1;K7ESN4	NA	NA	24.8293	24.4706	NA	24.1337	23.3381	NA	24.3817	NA	23.7248	24.5034	25.2612	24.6954	24.6203	24.4705	24.6344	21.6941	25.5774	25.6532	23.9477	NA	NA	24.3659	NA	24.2681	25.5876	26.0027	23.6136	23.6372	25.1746	25.6825	NA	24.8726	NA	NA	NA	NA	24.06	NA	NA	24.527	24.7414	24.1897	25.0128	24.2756	24.9914	25.1277	NA
K7EJ92	27.0294	27.3055	27.6709	26.2789	30.5501	30.1369	27.8694	30.0973	27.177	NA	23.3073	NA	NA	NA	NA	NA	NA	25.2484	25.9316	NA	24.5196	NA	NA	24.3232	25.8506	26.1835	26.8438	NA	25.4337	24.7384	NA	27.1639	NA	26.8879	26.9623	25.3593	28.6317	27.4937	26.302	28.6101	27.2253	28.4119	28.4424	28.8895	28.4654	28.5448	27.7774	26.6318	28.9067
K7EJE8;K7EKE6;P36776	25.6044	25.2259	25.3	25.2142	25.3364	25.7059	26.3358	25.9741	25.5388	26.3282	26.1794	26.2601	26.145	24.803	27.2862	25.5988	24.2978	27.1818	23.501	26.2933	25.737	25.754	26.1987	23.6359	24.2038	24.7505	24.607	25.7275	25.8634	26.4859	25.4318	NA	25.649	25.1479	25.8775	25.0826	24.6692	25.0434	25.7569	24.8156	24.8908	25.2082	25.405	24.858	24.8167	24.417	25.9008	24.8991	24.4347
K7EK07;P84243;Q16695;K7EMV3;B4DEB1;K7ES00;Q6NXT2	31.9186	33.4393	31.9786	33.4002	33.4208	33.7167	32.6073	33.7482	32.1483	32.2081	32.8605	32.6752	32.5332	32.3887	31.766	32.6334	32.8301	32.046	31.7885	31.3903	32.1733	31.7597	31.6565	32.9001	32.2746	32.4255	33.1119	31.7159	32.4926	33.0373	32.9945	31.346	33.6724	33.0812	32.8013	33.2763	33.9551	33.9337	33.0989	33.594	32.8292	32.9789	33.4237	34.2581	32.9081	33.4684	33.5007	34.0921	33.7192
K7EK35;P42229	27.344	26.7973	28.0904	27.2055	27.7619	27.1005	28.499	27.4863	27.5163	27.3664	27.6942	27.52	27.5449	27.4022	27.2591	27.4137	27.5486	27.5765	25.836	27.0309	27.5373	28.0701	27.7412	28.0082	28.1281	27.8557	27.4523	27.163	27.8051	27.1984	27.5904	26.8671	27.7324	27.1929	27.6604	26.4847	27.6467	27.3146	27.6926	26.9614	27.5769	27.2565	26.611	27.034	27.5623	27.1595	26.1042	26.5025	27.1964
K7ELL7;P14314	30.1099	30.1448	29.7845	29.9396	29.9846	29.9661	29.6726	29.5416	29.5998	29.6714	30.1678	30.1396	30.0536	30.1932	29.8823	29.9157	30.2903	29.2381	28.9754	29.0928	29.3295	29.0962	29.1106	28.7409	28.7425	29.3302	29.6486	29.7999	29.4359	29.137	29.238	29.0448	29.3846	29.8695	29.1539	28.5755	29.8031	30.1813	29.8278	29.5567	29.7332	28.497	30.152	28.3503	28.8459	30.0303	29.1829	29.7907	28.7947
K7ELM0	28.7978	29.254	28.5019	28.3954	28.3367	29.7901	29.0125	28.9401	27.5849	25.0199	26.4126	26.8825	27.3076	28.5065	27.8684	27.8717	29.5795	27.4805	28.0457	28.1239	26.9266	29.037	28.6791	27.6697	26.169	27.7918	28.0108	28.2766	27.1515	26.4942	NA	29.106	27.2533	27.0492	28.1357	27.9786	28.597	27.6256	27.198	26.9315	28.5459	26.0239	27.3707	27.5659	27.8097	29.3651	27.2158	27.562	28.6145
K7ELQ9;Q6UW68;K7EM09;K7EPR0	26.5496	26.113	26.3471	26.8257	25.4741	26.2232	25.0256	NA	25.6647	24.1191	25.4977	25.7701	25.3202	NA	24.1619	24.6677	NA	23.9987	NA	NA	NA	NA	NA	NA	24.7947	26.0217	25.3004	26.0172	24.7772	NA	25.431	25.1319	25.0956	25.6944	NA	NA	NA	26.3011	24.903	25.6573	25.8294	26.0298	NA	25.4763	24.9834	24.5642	25.3138	25.1655	25.1321
K7EM18;P41567;O60739	26.2699	26.0074	26.3202	26.0602	26.2715	25.9241	26.5605	26.2189	26.0591	26.1124	26.2146	26.2667	26.339	25.7439	26.4342	26.6044	25.8934	26.1345	NA	NA	26.4434	NA	24.6827	25.5323	24.5765	24.4532	NA	NA	26.6848	26.1743	25.5527	NA	25.6384	26.0178	25.5511	26.0458	26.3544	25.4703	26.407	26.8741	25.9954	25.5473	25.7689	25.0657	NA	25.7318	25.4158	25.4591	25.1534
K7EM38	27.2713	NA	NA	27.0785	26.5092	26.3219	NA	26.302	NA	NA	NA	NA	NA	NA	NA	27.3723	NA	26.9946	NA	NA	27.3617	27.7192	27.6835	28.0189	27.4643	27.0628	27.1675	27.4843	26.5164	26.8782	26.5562	27.5647	27.0757	27.4011	26.9834	26.9521	27.465	27.3273	27.4842	26.5584	26.5854	27.3518	27.8012	27.4779	27.212	27.2091	NA	27.4098	27.37
K7EMH1;K7ERI7;P35268;K7ELC4;K7EP65;K7EKS7;K7EJT5	27.8099	28.1647	27.9019	27.6683	27.7719	28.3668	27.681	27.8048	NA	27.4391	27.5185	28.2027	27.9425	27.7709	27.5366	27.6906	27.6225	27.293	NA	NA	27.1867	NA	28.5234	27.592	26.8262	27.2133	26.5063	NA	27.6615	27.5678	27.1537	NA	29.1028	28.6472	28.8076	27.8061	28.2554	28.344	27.8538	28.1481	27.9063	28.2084	27.5374	27.8354	26.6685	28.3189	28.172	27.7952	28.7251
K7EMM8;Q49A26	NA	NA	NA	NA	NA	NA	NA	NA	NA	NA	NA	NA	NA	NA	NA	NA	NA	NA	NA	NA	NA	NA	NA	NA	NA	NA	NA	NA	NA	NA	NA	NA	NA	NA	NA	NA	NA	NA	NA	NA	NA	22.4831	NA	23.1732	NA	22.5688	NA	22.9963	22.8791
K7EP32;Q9BZV1	NA	24.0719	NA	23.4254	NA	NA	23.3151	23.073	NA	23.5811	23.2665	24.1009	NA	NA	23.0828	23.2474	NA	23.3939	23.3812	23.4374	24.1795	NA	23.4104	NA	NA	NA	NA	NA	NA	NA	NA	NA	NA	NA	NA	NA	NA	NA	NA	NA	NA	NA	NA	NA	NA	NA	NA	NA	NA
K7EPV0;Q9Y2R0	25.1429	25.1612	25.5467	24.8535	NA	NA	24.749	25.0586	NA	NA	NA	25.3835	NA	NA	25.7656	25.1898	25.4885	NA	NA	NA	NA	NA	NA	NA	NA	NA	NA	NA	NA	NA	NA	NA	NA	NA	NA	NA	NA	NA	NA	NA	NA	NA	NA	NA	NA	NA	NA	NA	NA
K7EQ02;K7EQ55;K7EK33;Q96EP5	23.9122	23.9884	NA	24.3337	NA	24.6864	NA	NA	24.2624	24.5909	24.2763	24.5364	24.411	NA	24.3785	24.8362	24.4135	23.6393	24.6929	NA	24.5399	NA	25.0727	NA	NA	24.395	24.1744	NA	24.4658	25.2772	NA	24.6764	NA	NA	NA	24.6462	NA	NA	24.4321	NA	NA	24.4413	24.4699	25.1076	24.9223	24.3437	24.0817	24.8016	24.1309
K7ER15;Q9H0R4	25.3669	25.0571	25.7403	25.7083	26.44	25.3561	25.6394	25.9041	25.7323	26.1714	26.1097	26.0644	25.979	24.9866	25.9521	25.643	25.3963	25.4271	26.528	25.1852	26.2521	25.4691	NA	NA	NA	26.1622	25.9004	25.4958	25.9787	25.9285	26.0998	NA	25.6248	26.2531	26.2151	25.8697	26.3715	25.2069	25.5631	24.7285	NA	NA	NA	NA	NA	NA	25.5106	25.0663	NA
K7ERC8;Q06136	25.8513	25.936	25.8348	26.1878	24.658	25.6848	NA	NA	NA	NA	24.8613	25.0242	24.4645	NA	23.4449	24.5155	NA	NA	NA	NA	NA	NA	NA	NA	NA	NA	NA	NA	NA	NA	NA	NA	NA	NA	NA	NA	NA	25.7817	NA	25.1045	NA	25.6488	NA	25.4559	25.988	NA	25.4925	24.8027	26.0528
K7ERE1;Q8N2U0;K7ENI6	26.5877	26.3284	26.7286	24.4559	NA	NA	26.9722	27.2083	26.0373	27.2123	27.0395	26.6171	27.0405	26.4117	27.3132	26.8331	NA	26.5614	NA	NA	26.5996	25.3158	26.6868	26.9094	NA	NA	NA	NA	26.3991	25.8482	26.0228	26.1226	26.4493	26.8518	26.6569	26.725	NA	NA	NA	NA	NA	26.5414	26.8575	26.0778	26.8939	26.201	27.3113	NA	26.0966
K7ERG3;K7EP68	27.5807	NA	26.547	26.9504	27.1531	27.266	26.8097	27.3669	24.8768	27.9129	26.9686	27.8541	27.1287	27.7881	26.8203	27.0049	27.9287	27.7814	27.0084	28.1938	26.7952	27.0859	27.4796	27.5969	27.1881	27.3099	28.7077	27.8191	26.2585	26.7711	26.3165	26.6904	26.7018	28.3546	27.3229	26.8265	28.805	27.8632	27.6916	26.8727	26.3018	28.2871	28.2663	29.0278	28.3751	29.3146	28.5114	28.7655	28.6849
K7ERG9;P00746	27.1536	27.2636	27.192	27.1976	27.3797	27.1976	25.9086	28.3853	27.7493	26.6049	28.0013	27.1074	26.0498	26.5355	27.3148	27.5975	26.7501	29.2153	30.0414	28.7931	29.3094	27.7423	28.5807	29.3696	29.1533	27.8494	27.6755	29.7193	27.2371	27.6757	29.3591	28.2538	NA	25.9763	27.6138	25.7018	24.1644	24.1369	NA	23.9353	22.9572	26.7102	26.6923	27.5338	26.0441	24.8124	26.4254	25.117	28.269
K7ERI9;P02654;K7EJI9;K7ELM9;K7EPF9;K7EKP1	28.0986	28.5327	25.9375	26.213	26.0858	26.2027	25.4368	25.7828	NA	25.5315	27.783	NA	NA	25.844	25.4522	NA	NA	NA	NA	NA	NA	NA	NA	25.1726	26.8621	27.0346	27.4115	27.0923	26.3184	NA	NA	27.4482	28.7516	28.9623	26.0395	26.1015	26.3863	25.8448	24.9249	NA	NA	26.7054	25.0492	25.945	27.8239	26.5522	NA	NA	25.0387
K7ES31;K7ERF1;Q9UBQ5	25.0872	25.6666	25.3637	25.4758	25.1634	25.3336	25.7585	25.4666	26.1327	25.5384	25.4194	25.4629	NA	25.2432	25.6173	25.4275	25.1121	26.0013	25.4024	26.017	26.188	25.8725	26.4378	26.1781	26.5927	25.3827	NA	NA	25.6501	25.9161	25.22	NA	NA	NA	26.8008	26.3857	25.6564	NA	25.3545	25.9045	NA	25.1794	25.2064	25.6299	NA	25.226	25.3111	NA	NA
K7ES70;P55083	26.3095	24.9902	24.917	27.2433	28.2597	27.6239	27.6261	28.6239	27.2646	26.8567	26.3609	28.0827	26.0365	27.3435	28.1945	27.4108	27.0407	29.2282	30.5267	28.3693	30.1103	29.6031	29.1898	30.2325	28.4348	27.64	28.9298	28.7862	27.7626	26.6172	30.2037	28.4196	27.877	27.4809	26.0878	27.5385	26.4148	26.3934	26.3347	23.8159	NA	27.4054	27.0022	28.5917	26.3207	27.5841	27.108	26.9432	24.982
K7ESP4;Q8WVC6	24.0418	23.8049	24.004	25.0615	24.3492	NA	25.181	23.7759	25.1069	24.6649	25.2005	24.704	24.3976	24.5226	24.1133	24.4798	23.9119	NA	NA	NA	NA	NA	NA	NA	NA	NA	NA	NA	NA	NA	NA	NA	NA	NA	25.2351	24.5985	23.2183	NA	NA	NA	NA	24.36	NA	24.0113	24.5331	24.576	23.2235	NA	23.7548
K7N7A8;P29972	NA	NA	NA	NA	NA	NA	NA	NA	NA	NA	NA	NA	NA	NA	NA	NA	NA	NA	NA	NA	NA	NA	NA	NA	NA	NA	NA	NA	NA	NA	NA	NA	NA	25.0049	23.8403	NA	24.6495	24.6302	24.3716	24.7183	NA	25.7157	24.7131	NA	NA	NA	25.0934	NA	NA
K9JIK7;Q13030;E9PH25;E7EQF3;E9PD10;A0A087WU29;A0A0C4DFT7;P02724	NA	NA	NA	NA	NA	NA	NA	NA	NA	25.2519	NA	24.1197	26.3336	26.3645	NA	25.2277	26.4408	NA	NA	NA	NA	NA	NA	NA	NA	NA	NA	NA	NA	NA	NA	NA	NA	NA	NA	NA	NA	NA	NA	NA	NA	NA	NA	NA	NA	NA	NA	NA	NA
L0R6Q1	26.9237	27.2519	27.6789	26.9525	27.4145	26.7186	27.5272	27.3017	NA	26.7662	27.2778	27.3258	27.0107	26.6967	27.8043	26.9436	26.3469	27.0768	NA	NA	27.3057	NA	NA	25.8992	25.3143	25.8283	NA	NA	27.5135	26.5533	26.8057	26.3945	26.8048	26.4941	27.8711	26.9344	27.4169	27.0073	27.522	27.3624	27.1712	26.6109	27.0896	26.1906	25.9226	26.5179	26.9507	26.2951	26.1994
M0QXB4;O14579;M0R061	25.3729	24.7896	24.8312	25.2869	25.1899	25.7422	25.1196	24.957	25.5321	25.0062	24.9378	25.5053	24.8336	26.0958	24.772	25.0378	25.2513	25.4139	24.9876	25.3507	25.1493	NA	25.6621	25.7649	24.0553	25.3368	24.6699	NA	24.6929	25.9664	25.1756	24.9492	24.7578	24.9886	NA	NA	NA	25.2479	25.5207	NA	NA	24.998	25.0998	25.2326	25.1244	25.3801	25.0922	24.696	25.4844
M0QXB5;O95571	25.3786	25.7218	24.6882	25.5978	25.427	25.5214	26.0423	25.7306	25.7543	25.3281	25.1799	25.8081	25.3187	25.0644	25.8911	25.2888	25.5923	26.1756	25.5237	24.3866	25.9264	25.6256	24.7149	25.8773	25.7669	24.7021	24.7018	NA	25.2605	25.3655	25.3599	NA	NA	NA	NA	NA	NA	NA	NA	NA	NA	NA	NA	NA	NA	NA	NA	NA	NA
M0QXN5;P37198	NA	NA	NA	NA	21.173	NA	21.5752	21.5978	NA	NA	21.9486	22.2365	21.941	21.8108	22.1727	21.9876	21.5378	NA	NA	NA	NA	NA	NA	NA	NA	NA	NA	NA	NA	NA	NA	NA	NA	NA	NA	NA	NA	NA	NA	NA	NA	NA	NA	NA	NA	NA	NA	NA	NA
M0R0F0;M0R0R2;P46782;M0QZN2	28.1271	28.6853	27.6931	28.1294	28.1133	28.2915	28.3624	28.3671	28.4573	27.9555	28.3366	28.451	27.7463	28.3624	28.5231	28.1619	28.1454	28.5331	28.123	27.9035	28.2985	28.2245	28.888	28.6837	28.3838	27.6845	27.6139	NA	28.1932	28.7392	28.2133	26.7533	29.1037	29.0707	28.9218	28.4064	28.7976	27.9108	28.6151	28.0967	28.9508	28.3589	28.4013	28.6552	27.974	27.3909	28.5224	28.3469	28.3593
M0R0N4;M0QYZ2;P53680;M0QZ21;X6R390	27.1272	26.7018	NA	26.1319	26.3015	26.6939	26.8271	25.7765	26.6149	24.3057	24.2476	25.8418	25.2894	23.606	NA	24.9658	NA	NA	NA	NA	NA	23.8013	NA	24.2687	25.0591	25.5614	25.4803	26.1357	NA	NA	25.9832	25.481	NA	NA	NA	NA	NA	NA	NA	NA	NA	NA	NA	NA	NA	NA	NA	NA	NA
M0R117;Q02543;M0R3D6;M0R1A7;M0R0P7	27.9421	29.1695	27.4058	28.1939	27.7157	28.1808	27.7376	27.6635	27.7391	27.2994	27.2244	27.9652	27.3857	28.6161	28.0647	27.5003	27.261	27.1307	26.798	26.6519	28.1583	26.1468	28.6902	28.1807	27.6325	26.4625	26.9124	NA	27.4377	28.8645	28.2254	NA	27.527	27.3383	28.2778	27.5793	27.5748	27.8115	28.5598	25.7949	28.2712	27.2972	27.9433	28.2547	26.9124	27.5652	28.1243	28.0154	28.1098
M0R165;Q9UBC2;M0R2S2	25.9718	25.5596	25.9468	25.1124	25.6468	25.7876	25.6325	25.5306	25.4709	25.6998	25.3886	25.7823	25.7025	25.8824	25.8561	25.2447	25.5426	25.5091	24.8245	25.1953	25.2213	25.3909	25.4406	25.3742	24.9735	25.8675	25.496	NA	26.0672	25.9591	25.7465	25.656	24.6819	25.2564	25.4398	24.3681	24.6837	24.7495	25.6106	25.3024	25.2553	24.3535	25.4377	24.828	NA	25.0613	24.6564	25.6526	24.341
M0R3F1;A0A0A0MRA5;B7Z4B8;Q9BUJ2;M0QYZ0	24.3641	NA	NA	24.3783	24.5028	24.1612	24.8242	23.2264	NA	23.9169	24.8092	24.5467	NA	24.7827	24.3153	24.1955	NA	23.0102	24.8668	NA	24.3782	NA	25.0671	24.5352	NA	23.7827	24.5827	NA	25.2396	24.2121	24.402	NA	NA	23.8559	24.9476	NA	23.8525	23.6507	23.9974	23.9163	NA	24.696	25.3397	25.2628	23.1961	NA	22.7739	24.7667	25.5289
O00116;A0A1B0GWA2;A0A2R8YEL0	NA	NA	NA	NA	NA	NA	NA	NA	NA	NA	NA	NA	NA	NA	NA	NA	NA	24.5841	23.5504	25.3489	25.2131	23.897	26.4423	NA	NA	23.3576	23.5247	NA	22.9627	23.6351	23.2401	NA	NA	NA	NA	NA	NA	NA	NA	NA	NA	NA	NA	NA	NA	NA	NA	NA	NA
O00151	28.0411	28.7418	28.3651	28.6817	28.5112	28.9736	28.1462	27.9402	27.4939	28.1151	28.0903	28.2535	27.9644	28.2074	28.5169	27.4505	27.8542	28.0252	27.6494	28.3595	28.4078	28.6999	28.3219	28.5865	28.4629	27.7878	27.2185	27.1958	28.0194	28.225	28.7849	28.3747	28.3956	28.6075	28.1616	29.2566	28.8208	28.8476	28.6524	28.7103	28.2614	28.0358	28.2539	28.455	27.464	28.189	28.9844	28.2931	28.5634
O00159;F5H6E2	32.9613	31.901	33.7162	32.624	32.5209	32.6806	32.8193	33.4014	32.8122	33.1707	33.2087	33.5774	33.1206	32.5214	33.3209	33.0864	32.3434	33.3342	32.09	32.778	33.1066	33.4336	32.2262	32.7103	32.9731	32.5151	32.479	32.9175	33.1652	32.2496	32.0693	33.4439	33.3378	32.5206	33.63	32.7755	32.7086	32.5118	32.507	32.9363	32.9486	32.7056	32.2964	32.3717	32.2902	32.5422	31.8051	32.1156	31.6226
O00161;H3BM38;H3BNE1;H3BR18;H3BPJ0	25.2035	24.4757	24.8636	24.8282	24.3035	24.4186	24.8469	24.4192	24.5938	25.0147	25.2823	25.5688	25.2299	24.8806	25.3332	25.1515	25.4022	NA	NA	NA	NA	NA	NA	NA	NA	NA	NA	NA	NA	NA	NA	NA	24.7542	25.2481	24.5735	24.2376	NA	NA	NA	NA	25.3269	25.2824	25.1822	25.2315	NA	25.0054	25.6398	NA	25.4511
O00170;E9PMH2	NA	NA	NA	NA	NA	24.356	24.3161	24.1933	NA	24.485	24.7716	24.2613	NA	24.5796	24.3764	23.8959	24.2602	24.3743	NA	24.6674	23.4034	NA	23.6479	24.467	24.4628	NA	24.1111	NA	24.6225	24.5373	24.4893	NA	24.3618	NA	24.1083	24.3295	NA	24.5907	24.1327	NA	NA	24.5138	24.4513	24.7642	24.0106	24.1303	24.1171	NA	24.5819
O00186	24.469	23.863	24.4391	24.7084	25.0823	25.1495	25.062	25.793	23.6946	24.646	24.1743	24.8356	NA	24.4753	24.6916	24.5529	23.7312	24.5408	NA	24.7749	24.8343	25.8188	24.7895	NA	NA	24.4891	24.4434	NA	25.2039	24.9069	24.965	25.8343	23.7445	23.4532	24.7357	24.0474	24.3259	24.6178	25.1847	24.4122	24.1762	24.5389	24.4316	NA	NA	NA	NA	23.467	24.4511
O00203	25.9161	26.0501	26.4753	25.9422	26.1639	27.1451	27.6745	26.8439	26.361	27.0089	26.4308	27.1445	26.9652	26.598	27.0549	26.9705	25.7359	26.84	26.4196	24.9363	26.7411	26.866	27.0884	26.7737	26.3702	26.8853	24.5084	27.1345	27.0281	27.273	26.9503	26.7149	25.9085	26.0951	26.1402	25.986	26.2819	26.2768	26.5378	25.019	25.4381	25.2723	25.0825	25.474	24.6516	24.1659	24.9066	25.9314	25.6625
O00204	NA	27.8685	25.2029	25.1248	NA	26.571	24.1004	NA	NA	28.3742	29.9543	27.59	29.464	24.7695	27.0665	25.5224	NA	NA	NA	NA	NA	NA	NA	NA	NA	NA	NA	NA	NA	NA	NA	NA	NA	NA	NA	NA	NA	NA	NA	NA	NA	NA	NA	NA	NA	NA	NA	NA	NA
O00231	27.4388	27.8572	27.8243	27.8024	27.8219	27.9128	28.0703	27.6393	28.0338	27.6992	28.171	27.7003	28.0189	27.2602	27.6273	27.5465	27.391	28.0995	28.6916	28.4899	27.9869	27.9562	27.9539	27.9353	28.5118	28.2954	28.2414	27.6962	28.0205	27.9413	27.4877	27.4638	27.1596	27.9727	28.1515	27.6669	27.8298	26.9814	28.1124	27.3778	27.5988	28.031	27.6138	26.9224	27.4935	27.6308	27.6552	27.4725	27.2089
O00232	26.2372	26.3499	26.4733	26.329	26.6515	26.3206	26.8142	26.1839	26.4197	26.5052	26.0649	25.7788	25.9051	26.4547	26.2523	26.1474	26.2843	26.3442	26.6553	26.5082	26.4199	26.9062	26.7126	26.4051	25.8545	26.0289	25.46	26.083	26.1205	26.0817	25.9807	26.009	25.6889	25.3994	26.1309	25.4644	25.6831	26.1582	26.4358	26.0074	26.4426	25.6079	24.9295	25.5395	25.4969	25.4438	25.0086	25.209	24.3591
O00244;E5RGN3;E5RIM7	25.2384	26.2741	NA	NA	27.0878	26.6823	26.5477	27.0221	NA	26.2961	25.2918	NA	NA	25.7667	NA	NA	NA	NA	NA	NA	NA	NA	NA	NA	NA	NA	NA	NA	NA	NA	NA	NA	26.6058	26.2384	26.479	25.7669	26.1037	26.0738	25.2235	NA	NA	26.4944	NA	26.0176	25.5515	26.7019	25.2567	NA	25.3528
O00264	29.6783	29.0047	29.4002	29.2942	29.5559	29.1768	29.3542	29.5705	29.7293	29.3762	29.7736	29.4837	29.3116	29.5637	29.6998	29.3412	29.418	29.6776	28.4059	28.4134	29.3143	28.8237	28.8615	29.3848	29.5963	29.0997	29.3139	28.2721	29.1205	28.9477	29.5385	27.7063	30.3315	29.2308	28.6377	29.0284	29.8461	29.4773	29.3377	29.2855	29.9865	29.2019	29.7263	28.7349	29.1718	29.2873	29.7782	28.9318	29.3224
O00273	NA	NA	NA	NA	23.8292	NA	24.6356	24.4898	NA	24.7237	24.8205	24.6947	NA	24.7158	24.0918	24.0815	24.5959	NA	NA	NA	NA	NA	NA	NA	NA	NA	NA	NA	NA	NA	NA	NA	24.8865	NA	24.9716	NA	NA	NA	24.5473	NA	NA	24.0026	25.1891	24.1728	24.9495	25.2787	24.52	24.1528	24.4643
O00291	25.3693	25.9506	25.1385	25.1824	25.4716	25.5333	25.7158	25.4796	25.7724	25.385	25.7005	25.8624	25.1619	25.4314	25.2849	25.566	25.1055	24.9745	25.0476	25.2341	25.5561	24.8993	25.0654	25.1041	25.4784	25.1964	24.8283	NA	24.6423	25.3023	25.643	NA	25.1492	25.3521	25.3838	25.3542	25.8988	NA	25.375	25.8211	NA	24.7109	25.2244	25.5693	NA	25.1369	24.9557	25.2815	25.5456
O00299	30.5792	30.5919	29.6854	30.2256	29.6515	30.0776	30.3675	30.1746	30.0227	29.9346	30.1088	29.7554	29.7716	29.9663	29.4989	29.3495	29.4042	30.4446	30.0947	30.1621	30.6014	29.5625	30.5206	29.7882	30.125	29.6454	29.9435	29.546	30.0801	30.4345	29.7705	29.3959	29.8713	29.7852	29.844	30.2549	30.1112	30.4842	30.5013	30.4024	29.5473	29.8723	29.3014	29.7843	29.0559	29.7101	29.2951	29.594	29.3787
O00303	25.5872	25.7689	25.9071	25.6787	25.7659	25.3651	25.7811	25.6239	25.6333	25.3874	25.5451	25.4838	25.546	25.2887	25.5803	25.5325	25.3514	25.9458	25.8255	26.5373	26.0951	24.1174	26.2019	26.1995	25.9082	25.7605	25.9731	26.2226	25.6444	25.8709	25.8316	25.9881	26.3902	25.7187	26.0326	25.8292	NA	NA	25.8717	26.1554	25.9161	26.1121	25.2726	25.8915	25.9797	25.2493	25.2095	25.2921	25.9744
O00330;H0YD97	NA	NA	23.9465	23.6195	23.9584	NA	23.0932	23.4856	24.1343	24.0846	23.382	23.844	24.8005	24.0565	24.9329	24.5038	24.704	23.5032	NA	NA	23.4323	23.2956	23.1644	23.7463	23.3155	23.4634	NA	NA	24.9707	23.6326	23.7241	NA	23.2839	23.8199	NA	NA	NA	23.6462	NA	23.9211	23.979	23.2625	23.8456	NA	24.6831	23.501	25.1349	23.5909	NA
O00391	24.3136	24.9249	24.7635	23.892	24.5534	24.4019	24.2104	23.6112	24.0972	23.6086	24.658	24.1573	NA	24.0242	24.9478	23.6482	24.3773	24.8728	25.7348	25.636	24.4915	24.9033	25.2935	25.4107	23.4269	24.4824	24.699	24.7842	23.2222	25.0487	23.6046	NA	23.9437	25.4049	24.5272	24.5107	24.9133	25.4924	NA	24.677	24.9001	24.4318	25.8589	25.3179	24.2624	24.4704	25.7261	24.9676	24.7854
O00410;H0Y8C6	25.7934	25.0093	26.0693	26.4528	25.6734	26.7886	26.3813	26.9682	26.8845	26.2677	26.2188	26.3191	25.6712	26.4428	26.2208	25.9298	25.9219	26.655	26.6225	25.9506	26.6967	25.816	27.0653	26.5863	26.0655	26.1822	25.7886	25.3878	25.9269	27.4208	26.0928	26.2741	24.2379	24.7205	26.1041	26.8999	24.7845	26.058	26.2919	25.5298	26.0434	26.1523	25.8983	26.8361	25.9609	25.2591	25.9005	25.6458	25.6791
O00442	24.5682	23.6763	24.1989	24.8732	24.5684	25.1561	24.1102	24.4567	24.8762	NA	24.2075	23.6777	24.2585	24.9711	24.2145	24.7224	24.7172	24.5587	25.4627	25.129	24.8367	24.5937	24.0561	NA	NA	24.1752	NA	NA	24.5723	24.2031	23.9369	24.2932	24.3386	NA	24.018	24.6845	NA	24.6521	25.1614	24.8832	NA	24.288	23.775	24.4277	23.9036	23.7339	22.7622	NA	24.1499
O00468;A0A087X208	25.3423	25.1406	25.0992	24.8588	24.7516	25.1151	24.9746	24.6813	NA	24.8284	24.8497	25.177	25.2238	24.0564	24.562	25.6735	25.7349	NA	NA	NA	NA	NA	NA	NA	NA	NA	NA	NA	NA	NA	NA	NA	NA	NA	NA	NA	NA	NA	NA	NA	NA	25.7907	25.5234	25.7906	NA	25.5665	24.9127	NA	NA
O00483	28.4048	28.6019	29.3928	28.4641	28.4718	28.1932	29.1352	28.1351	NA	29.1749	29.1434	29.1457	28.9843	28.2035	29.5364	28.4654	28.5586	28.3413	26.9532	NA	NA	NA	28.1345	28.3267	28.134	27.7747	27.7326	NA	29.3735	28.2101	28.5148	27.2892	28.2449	28.5125	29.7219	28.6493	29.348	28.5264	28.7432	29.583	NA	28.5517	29.3479	28.5819	28.3941	28.3726	28.9838	29.363	28.8647
O00487	25.3956	NA	25.8592	24.8687	25.4012	25.7125	25.3597	25.6411	25.5203	25.5983	26.1244	25.4779	25.9575	26.173	26.1603	25.6615	26.1195	26.263	25.7989	24.9025	24.9841	25.6617	26.2331	26.0407	NA	26.7554	26.6682	26.8257	25.2713	24.8847	NA	26.733	NA	25.5326	25.6966	25.6672	26.1259	NA	25.5897	NA	25.2738	25.8575	25.3683	25.2914	25.4396	25.4488	25.0957	25.2981	NA
O00499	26.7838	25.7429	26.7588	26.7005	26.8964	26.7487	27.0849	26.6334	25.7849	27.1033	27.1384	27.1939	27.4522	27.3973	27.3642	27.1446	27.2423	26.87	NA	25.3323	26.4484	26.4539	26.327	26.3221	NA	26.9538	26.945	NA	27.2658	26.7867	27.0452	26.4331	28.0021	26.8985	27.367	26.5319	27.7179	27.0241	27.4726	27.2229	27.5984	26.1143	27.1595	25.1869	26.5051	27.3432	26.7804	27.0029	26.6585
O00534;B4DHS6	23.8331	23.5834	23.5875	23.1501	23.8163	23.7698	22.2496	22.9137	22.6992	NA	NA	NA	NA	NA	23.0101	NA	NA	23.7863	NA	24.1905	23.5225	23.3711	24.8901	24.1618	NA	NA	NA	NA	23.7813	24.648	26.2509	NA	23.0994	NA	24.0862	NA	23.461	23.8865	23.1004	23.1416	23.4253	23.2855	23.7393	23.2319	23.1723	23.1269	23.2252	NA	23.3165
O00560;B4DHN5;E9PBU7	24.2564	24.8447	24.5204	24.5414	25.335	25.1272	24.7848	24.6504	24.2232	24.7572	24.5829	24.368	24.7418	23.9416	24.1955	24.0722	NA	24.8589	24.1912	24.5437	25.006	NA	25.3986	24.9627	NA	24.1026	24.6919	NA	24.4356	24.8251	24.4056	NA	NA	NA	NA	NA	NA	NA	NA	NA	NA	NA	NA	NA	NA	NA	NA	NA	NA
O00567;H0Y653;H0YDU4;Q5JXT2	NA	NA	NA	23.7183	23.6161	NA	24.022	23.9274	23.7325	NA	23.8889	NA	NA	23.7109	23.8057	24.0256	NA	NA	NA	NA	NA	NA	NA	NA	NA	NA	NA	NA	NA	NA	NA	NA	24.2773	NA	NA	NA	NA	NA	23.8401	NA	NA	24.4235	23.8032	23.9184	NA	24.0618	24.464	24.1775	23.6171
O00592	26.3131	26.1323	26.3213	25.7787	25.9682	26.6363	25.2881	26.5567	27.0183	26.1689	26.6857	26.5557	25.8871	26.8124	25.8231	26.6638	26.7792	24.9514	25.5386	25.2549	24.801	25.374	24.8239	24.8944	25.0194	25.7078	25.4849	NA	26.1623	24.864	26.031	25.6521	28.1269	26.885	25.3544	25.87	27.0085	27.5929	25.5577	26.7937	27.3976	28.5164	29.0055	28.8069	27.2199	28.0566	28.2418	29.7035	29.5538
O00625	NA	24.2504	24.518	25.0685	24.6815	25.0139	25.3245	NA	24.4442	25.6852	25.6856	25.3998	25.1433	25.8457	24.3436	24.2224	24.7708	24.6503	24.4897	24.5117	25.2679	25.0188	25.0147	25.0029	24.1358	25.0192	24.8811	NA	25.2581	24.656	24.1702	25.3103	24.2982	NA	24.4784	25.304	24.3008	24.6888	24.6558	NA	NA	24.9525	25.108	24.647	24.4706	24.3427	23.5722	NA	23.7504
O00629	25.0157	24.4383	24.9098	25.5028	26.2078	25.1593	25.6876	25.9098	25.7663	26.0324	25.9364	26.0605	25.7037	25.8738	25.817	25.7934	25.151	26.0041	24.9707	24.389	25.3971	25.3677	25.9751	26.217	24.8134	26.4137	25.9488	NA	26.0024	26.7873	25.3881	NA	24.6806	24.7102	25.7481	25.9413	25.8037	25.7746	26.0531	25.3452	25.7296	25.8824	26.0455	25.7543	25.6997	25.6367	25.5788	25.005	24.9218
O00743	26.535	NA	NA	26.1189	25.6112	25.4323	25.64	25.8055	25.989	25.6633	26.0825	25.9383	26.2395	25.567	25.7659	25.3964	26.1715	26.0016	26.6682	26.0137	26.0666	26.4823	26.4047	NA	26.0893	27.5855	25.6261	NA	25.4469	27.3604	27.5213	28.4062	26.3206	26.7668	NA	26.733	26.5409	26.8895	27.1883	26.5987	26.5681	25.9497	25.756	25.9314	26.0949	25.9244	26.2655	25.998	26.4219
O00748;J3QSC0	24.5643	NA	25.5288	24.1587	25.5754	25.5447	27.123	21.3383	23.5575	24.7095	21.2648	25.2709	24.8054	26.9384	24.3493	23.9589	25.0855	25.5342	NA	24.2253	25.517	26.0025	25.4083	25.4853	25.1434	26.2115	24.852	NA	26.0565	27.413	24.0625	NA	25.7823	24.9722	26.4332	25.8157	25.7158	25.9758	26.8634	25.219	25.3498	23.5239	NA	21.3125	23.6806	NA	23.9335	NA	NA
O00763;F8W8T8	29.4726	29.4459	30.2178	29.3516	29.8979	29.7008	29.2581	30.0863	30.1237	29.6377	29.8997	29.5523	30.7062	29.1769	29.8639	30.7549	30.4778	27.9836	26.4462	27.2555	28.1407	27.4439	27.9412	27.6914	28.0913	28.6492	29.3929	25.5178	29.1135	28.1223	29.9896	28.9213	29.15	28.3408	28.9431	28.7801	29.8108	29.2357	28.3932	29.5565	29.7448	29.2831	28.4679	29.164	30.9581	28.8737	29.9485	29.9071	30.0327
O00764;F2Z2Y4	28.847	28.7999	28.8311	29.4603	29.4859	29.2518	28.8558	29.4138	29.4192	29.7239	29.7998	28.9929	29.6337	29.6472	29.5697	29.712	29.3624	29.1513	28.6781	28.1892	29.198	29.0563	28.1452	29.2253	29.1646	29.6876	29.9965	29.5075	29.7074	28.8743	29.5412	29.8306	28.6602	28.5371	28.63	29.1841	29.089	29.0721	28.8571	28.9459	28.5269	29.0381	29.5201	28.8698	29.6142	29.7698	29.5074	28.8981	28.5095
O14494	23.8271	NA	23.888	23.958	23.83	23.5662	25.7112	23.9777	24.7137	24.5108	24.0666	25.0164	24.6282	23.9216	25.1989	23.1839	NA	NA	NA	NA	NA	NA	NA	NA	NA	NA	NA	NA	NA	NA	NA	NA	NA	NA	NA	NA	NA	NA	NA	NA	NA	NA	NA	NA	NA	NA	NA	NA	NA
O14495;A0A286YF41;A0A286YEZ7;A0A286YES4	24.0006	NA	NA	23.5481	23.7691	24.0691	23.1948	22.9645	23.0006	23.797	NA	23.6907	23.6316	23.5944	23.0789	23.8004	23.8368	NA	NA	NA	NA	NA	NA	NA	NA	NA	NA	NA	NA	NA	NA	NA	NA	NA	NA	NA	NA	NA	NA	NA	NA	NA	NA	NA	NA	NA	NA	NA	NA
O14498;H0YL90;H0YN67	25.681	26.0544	25.2288	24.9548	24.9261	25.0407	25.0102	25.2494	24.4467	NA	24.6603	24.3618	NA	23.9824	24.6375	NA	23.9175	24.4981	25.2734	25.6795	24.4316	24.8394	NA	24.8928	25.009	NA	NA	26.146	23.4314	25.1508	25.596	NA	24.8663	24.5554	NA	24.4528	NA	24.5403	24.225	24.8415	24.2823	24.3764	25.5728	25.0813	NA	24.2047	24.4848	24.4358	24.9813
O14521	26.6463	26.7608	27.1599	26.4385	26.3924	26.0284	26.8419	24.6099	NA	26.4789	27.495	26.9906	27.664	NA	27.8439	NA	26.471	NA	NA	NA	NA	NA	NA	NA	NA	NA	NA	NA	NA	NA	NA	NA	NA	NA	NA	NA	NA	NA	NA	NA	NA	NA	NA	NA	NA	NA	NA	NA	NA
O14548;E5RJZ1;H0YBD2	24.5015	24.5385	24.8411	24.6212	NA	24.7446	25.1517	NA	NA	24.4493	24.3964	24.3336	24.7061	NA	24.8366	24.3315	24.3119	NA	NA	NA	NA	NA	NA	NA	NA	NA	NA	NA	NA	NA	NA	NA	NA	NA	NA	NA	NA	NA	NA	NA	NA	NA	NA	NA	NA	NA	NA	NA	NA
O14558;A0A1X7SC65;K7EP04	31.5697	31.5748	32.2175	31.5559	32.4585	31.8405	31.7411	32.026	32.5455	32.1918	32.4589	32.0977	31.798	31.9347	31.5051	31.4881	31.8958	31.8921	30.5366	30.3837	31.577	31.2296	30.9052	32.1518	31.4336	31.7956	31.5564	31.5478	32.0384	30.8767	30.7837	31.2482	31.1974	31.3737	31.942	31.9149	31.9866	31.8039	30.7514	30.9442	31.2879	31.3649	32.22	30.994	31.6503	31.9027	30.7358	30.4207	30.9757
O14561;I3L505;H3BNK3	27.4215	27.0742	28.1241	27.3398	27.7672	27.3881	27.6021	26.3083	27.1671	27.9806	27.9939	28.0667	28.2495	27.1004	28.1448	28.2358	27.2818	27.5505	27.0031	NA	27.3836	25.6821	25.6191	26.0757	24.8008	26.8845	25.9173	NA	27.7152	27.3039	27.5119	27.1205	26.9409	26.6951	27.0804	26.6278	26.2055	25.8517	27.0137	25.8756	26.6259	26.7938	27.7266	26.8002	26.4201	27.409	27.6085	27.6646	26.7074
O14602;A6NJH9	25.7443	25.4966	24.6253	25.304	25.5714	26.0415	25.6361	25.7021	26.4339	25.6948	25.1464	25.8538	26.1776	25.4366	25.9542	25.723	25.9346	25.6975	25.7694	NA	25.7174	25.8392	NA	25.6597	NA	26.0576	NA	NA	26.286	25.9344	27.1622	NA	26.0634	25.7722	26.4654	25.8386	26.5182	NA	NA	26.6354	NA	26.3716	26.3658	26.1463	25.8992	26.3415	26.7513	26.945	27.0971
O14672	25.6626	25.2642	26.1698	26.0482	26.3134	26.0455	25.7816	25.4068	NA	NA	NA	24.6979	NA	25.2863	25.0952	25.4356	NA	25.4123	25.5927	NA	25.5473	25.4279	24.7402	NA	NA	25.6907	25.3479	NA	25.7142	25.7153	26.4694	NA	25.6966	25.5222	25.7308	NA	NA	25.575	26.0356	24.9596	25.35	25.0309	26.4259	25.6674	NA	25.9405	25.6284	25.5206	25.7493
O14737;K7EQA1;K7ESJ4	25.8812	25.8729	26.2879	25.9843	26.6603	25.8298	26.0977	26.0171	26.7297	25.7649	26.5756	26.3759	26.7214	25.8807	26.4988	26.3107	26.2357	26.3065	24.837	NA	25.5	NA	NA	NA	24.1452	25.0898	24.9636	25.7584	26.4861	26.2574	25.438	NA	25.9452	25.8333	26.5527	26.0123	NA	24.8959	24.6176	25.416	27.5184	25.2362	25.469	24.0973	NA	25.7972	24.6194	25.0715	25.3009
O14744;G3V580;G3V2L6	25.3728	24.9276	25.4196	25.3759	NA	25.6642	25.3263	25.5283	NA	25.0433	25.1235	24.8067	25.2215	24.8616	25.0538	25.1622	25.053	25.1813	26.0877	26.1017	25.1025	25.7791	26.1894	24.7613	24.3955	25.5733	25.9184	NA	25.5016	24.1926	26.4756	NA	24.637	25.7836	24.7869	24.6501	24.8665	25.4319	24.7284	24.9189	26.058	NA	NA	24.6476	25.5038	24.54	25.252	25.0818	24.8767
O14745;J3QRP6	26.1058	25.6389	NA	25.3932	25.5055	26.1888	25.605	25.5796	25.6536	25.9841	27.1208	26.3597	26.7273	26.6824	25.4177	26.6191	26.5355	25.314	25.151	25.039	23.4199	23.8485	23.8456	NA	23.6459	26.4696	26.1142	24.3008	25.0839	25.4581	26.2826	25.6046	27.3485	26.2463	24.3318	25.3533	25.4371	26.145	25.8405	26.1481	25.9711	28.5377	28.759	28.1442	27.4901	28.2045	27.7531	28.7747	29.0053
O14791	26.9559	26.7896	26.4233	27.0628	26.1462	25.9504	25.6913	26.3881	26.2715	27.1032	27.9509	26.8157	28.2842	26.535	25.3224	27.8716	28.4641	25.3168	29.1706	28.4234	25.6121	25.5898	26.1067	26.6627	27.169	28.3334	28.3253	27.9621	25.1623	25.1123	24.7768	28.6805	26.783	28.1906	26.5894	27.5639	25.5826	25.4463	25.9773	26.5972	26.1444	27.8163	28.2782	27.5017	28.7806	27.9734	26.7128	28.1531	27.6554
O14807;C9J8Q6	25.5982	26.0672	26.1137	26.3081	26.7101	26.2157	26.2195	26.6932	27.1643	26.4785	26.6536	26.0575	26.5872	26.1449	25.9766	26.4025	26.3822	25.6394	NA	NA	25.8952	NA	NA	NA	NA	25.5128	NA	NA	26.9064	25.0548	25.544	26.1593	NA	NA	NA	NA	NA	NA	NA	NA	26.5209	25.5453	25.9582	25.1721	NA	25.6331	25.8255	NA	25.2976
O14818	28.6337	28.78	28.8866	28.7722	28.8983	28.994	28.9142	28.8254	29.1567	27.8701	27.7221	27.7844	27.718	28.0851	28.5072	28.3101	28.7533	28.4915	29.3431	29.3933	28.745	28.3197	28.8184	28.0314	28.7381	28.9049	29.1468	29.7748	28.7448	28.5816	28.6834	29.2432	28.35	28.7315	28.2624	28.3824	NA	28.1296	28.5013	27.5832	28.0336	28.5776	28.7974	28.6492	28.3544	28.6396	28.4186	28.0179	28.3768
O14828	25.4197	25.7912	25.4033	25.041	25.1368	25.8511	25.3647	NA	NA	NA	24.833	24.9889	24.8028	24.7911	24.6373	24.1298	24.7633	24.2097	NA	24.4696	24.3696	24.9941	24.9513	24.5156	24.9511	NA	NA	NA	24.6093	24.5957	24.4074	NA	25.4964	25.2068	24.9458	NA	NA	25.2516	25.1884	25.1033	NA	NA	24.6124	NA	24.7124	24.6318	25.0623	NA	NA
O14841	25.8271	26.4324	26.1807	26.7077	26.1185	27.1538	26.8373	26.8264	26.6131	27.1578	27.0487	27.2971	27.3023	27.1172	27.6353	26.7763	27.427	26.8319	25.2506	25.6266	26.7042	25.9203	26.0722	26.1481	25.6234	27.1068	26.6736	NA	27.5353	26.3705	27.1811	26.1439	26.3262	25.641	26.6975	27.0287	26.2678	26.9668	27.0279	26.8088	26.6127	26.9715	27.8412	27.0031	27.8997	27.014	27.8393	27.4636	28.2602
O14879	NA	NA	NA	NA	NA	NA	NA	25.1167	NA	23.3209	NA	23.2489	24.1532	23.4319	NA	23.3882	24.7667	NA	NA	NA	NA	NA	NA	NA	NA	NA	NA	NA	NA	NA	NA	NA	NA	NA	NA	NA	NA	NA	NA	NA	NA	NA	NA	NA	NA	NA	NA	NA	NA
O14907;A0A087X282	25.2263	26.1476	25.716	24.9996	25.9121	NA	25.9918	24.9818	NA	25.5058	NA	25.5359	25.218	25.6655	25.4224	NA	NA	NA	NA	NA	NA	NA	NA	NA	NA	NA	NA	NA	NA	NA	NA	NA	NA	NA	NA	NA	NA	NA	NA	NA	NA	NA	NA	NA	NA	NA	NA	NA	NA
O14949	28.201	28.1802	29.1375	28.5219	28.538	27.9977	28.681	29.1937	28.156	27.8838	28.8876	28.9048	29.1407	28.2306	29.2789	28.7857	28.377	27.9003	26.4701	25.6585	28.1247	27.1905	27.7028	27.8292	26.7438	27.8097	27.4245	NA	29.5374	28.1525	27.8688	NA	28.5907	28.1292	28.9643	28.1308	29.2763	27.0351	28.9247	28.6474	28.0067	27.7526	29.0501	27.7493	27.7069	27.5704	28.2313	27.6612	27.4144
O14964	26.1869	NA	26.4704	NA	27.172	NA	25.2845	27.2159	NA	26.8325	26.2207	26.3957	25.5509	26.1564	26.1811	NA	25.4341	25.2624	NA	26.0008	25.6259	NA	26.6349	25.278	NA	26.0277	26.0539	26.8405	25.277	26.2448	NA	NA	26.9161	26.6621	26.6535	26.3536	NA	NA	27.0198	NA	25.9951	27.1976	26.6362	27.0103	26.5868	27.4466	27.616	25.7731	NA
O14974;F8VZN8	24.7142	24.7486	25.4682	24.1954	24.7381	24.8322	25.0476	25.8258	23.5093	25.0498	25.0456	26.2835	26.0799	25.6813	25.6949	25.7734	25.3266	25.3224	24.9389	NA	24.3159	25.7416	23.9669	25.0112	24.1442	24.7502	24.9095	NA	26.3856	24.8239	25.2027	NA	25.4494	25.4688	NA	26.2244	25.8504	25.841	24.9043	24.3253	25.3481	23.2112	25.6025	23.9517	25.0354	25.0178	NA	NA	24.2924
O14980	25.8627	25.5188	26.4167	25.2299	25.5538	26.2737	25.4633	25.7722	25.5753	25.6433	26.6611	25.6623	25.5955	25.2385	26.4182	25.9536	25.342	25.8698	25.8235	26.0487	25.413	25.8866	25.5781	25.3683	25.6743	25.9492	26.0162	NA	26.071	25.293	24.9657	27.1407	24.8915	24.0366	26.6874	24.5335	24.7037	24.7373	25.2276	24.9051	24.5957	25.7883	24.6121	26.3332	25.295	24.6374	24.5192	25.4696	24.8519
O15031	26.4675	26.8204	26.3441	26.4689	26.2388	27.0267	25.9853	25.9568	25.7525	26.4033	26.3319	26.0894	26.0214	26.3311	25.7579	26.0023	26.2776	25.6764	25.9188	26.0923	26.0361	26.0629	25.9647	25.702	26.1106	26.4979	26.2338	26.12	25.7047	26.045	25.7124	NA	26.4685	26.6348	25.9386	26.6626	26.5919	26.5656	26.5711	26.6412	26.3401	26.3709	27.0095	26.9749	26.3243	27.0467	26.6267	26.8452	27.2514
O15061;A0A075B7B1;H0YL34	27.5086	28.6836	27.759	28.1721	27.7645	28.7361	29.1665	27.4208	28.0792	29.1968	29.2129	29.146	29.484	29.561	28.4543	28.9992	28.7942	26.9642	28.0885	27.4899	28.2144	29.1446	27.3754	27.2384	27.3748	28.362	28.9207	27.0574	29.5136	28.4432	28.7602	28.5833	28.4761	28.9355	27.9031	27.828	27.199	29.6507	29.7558	27.683	28.4422	26.4299	28.7874	28.0138	27.8443	28.7163	25.0169	27.305	23.7985
O15067	26.5165	26.7672	26.089	26.583	26.3609	26.7807	26.068	25.9431	26.8476	26.8996	26.042	25.9942	26.182	26.7963	25.9606	26.1231	26.5845	26.8791	28.2698	28.1446	26.7291	26.8689	26.396	26.5871	26.7899	27.64	27.3128	26.1639	26.3062	26.589	26.1579	27.2667	26.3418	26.6196	25.329	25.9263	24.9222	26.4875	26.4091	NA	26.2085	26.6321	26.0559	26.3388	26.7097	25.4031	25.7148	26.2429	26.2808
O15120	27.3768	27.2419	27.0167	27.506	27.0493	27.4354	27.7495	27.4225	27.5209	27.7481	27.8512	26.9719	26.9947	27.2582	27.4041	27.4562	26.3113	27.5476	26.4021	26.3337	27.6799	27.3112	26.4095	26.6001	28.0287	26.8438	27.6412	NA	27.6989	25.318	26.7071	26.3677	27.1062	26.6466	26.0628	26.4926	27.6325	27.1386	27.7836	27.8877	27.9096	26.8568	26.5209	25.7802	27.982	26.9877	26.9274	26.4358	27.1194
O15127	26.3541	26.4941	25.3946	25.9009	25.6666	25.8843	26.2932	26.0813	25.9169	25.5646	25.8274	25.701	25.8248	25.3518	24.9186	25.1438	25.3577	25.6621	25.5809	25.9984	25.3694	26.233	26.1757	25.1171	25.3439	NA	NA	25.9092	24.7564	25.8734	26.222	25.8238	25.8925	26.6239	25.661	26.3329	25.9462	26.5796	26.4753	26.1978	25.1784	25.5236	25.2772	25.2033	25.229	25.8011	26.2837	25.7416	25.1358
O15143;C9JEY1;C9K057;C9J4Z7;F8VXW2;C9JQM8;C9JFG9;C9J6C8	30.1317	30.392	29.5844	30.2029	29.3016	29.6199	29.443	28.8293	29.3127	27.1805	27.7142	28.0674	27.6395	27.8195	27.353	27.5519	27.8265	27.7488	27.9487	29.128	27.5616	28.1594	28.6138	27.9377	28.3445	28.269	28.0428	29.3013	27.3468	29.6294	29.0956	28.7944	28.6982	28.8962	28.181	28.6286	28.8942	29.3068	28.5731	28.3602	29.245	29.128	27.9129	29.3395	28.3663	28.8085	28.5697	28.1186	28.7021
O15144	28.5472	28.6376	28.7569	28.7829	28.5216	28.8568	28.7934	28.5354	28.6674	28.636	28.3465	28.5087	28.4404	29.0087	28.2144	28.3598	28.751	28.4762	28.6957	28.6257	28.2718	28.8293	28.8161	28.6371	28.0755	28.6496	28.4168	28.7154	28.0895	29.2905	28.7158	28.9632	28.3345	28.5943	28.0324	28.5031	27.7024	28.262	28.4435	28.2727	26.3316	28.7326	28.3137	28.4779	28.4424	29.1501	28.2773	28.2784	28.7115
O15145;C9JZD1;F8VR50	28.0289	28.2476	27.8442	27.9525	28.2808	27.9733	28.5714	28.3461	28.4328	28.2379	28.28	28.0566	27.9691	28.3298	27.9667	27.6936	28.1953	28.4725	28.1357	27.8492	28.1271	28.4249	28.7443	28.5489	27.6086	27.9558	27.5262	26.8115	27.8649	28.8853	28.011	27.3741	28.5095	28.4684	28.6837	28.9669	29.0997	29.4768	28.8108	29.1395	29.9292	27.8444	27.7033	28.0781	27.7502	27.9392	27.9745	27.446	28.1066
O15173	29.701	29.5263	29.9844	29.9093	29.9541	29.8747	30.0846	29.827	30.1276	28.9916	29.6671	29.6718	29.6754	30.2282	29.5944	29.8039	29.9345	29.9995	29.1994	28.9777	30.1459	29.6198	29.4495	29.8202	30.1411	29.916	29.7996	29.0318	29.6184	29.6826	29.2715	29.1236	29.0492	29.3957	29.7107	29.3461	28.643	29.5378	29.623	28.6511	27.5412	29.6045	29.709	29.0619	29.4546	30.0777	29.6175	28.7242	29.3526
O15230	25.5204	24.3404	24.8167	25.1014	24.7084	24.5537	23.7618	24.9558	24.6308	23.8782	23.7485	24.1865	24.3652	NA	23.5908	24.2792	24.4044	24.2109	25.5794	25.4583	23.7443	NA	23.8906	NA	NA	24.3092	24.1615	NA	23.7748	24.3552	25.1331	NA	24.4565	24.5075	23.9835	24.4536	24.8357	24.6093	23.8181	24.3564	25.5318	24.109	NA	23.7224	23.7919	24.0055	23.7537	23.9101	24.0119
O15247	25.0712	NA	NA	24.3213	24.0014	NA	24.0081	24.36	23.7226	25.2343	24.7909	24.6438	24.6275	24.0341	24.0852	24.0443	NA	24.642	24.8253	24.313	25.0058	NA	23.7305	23.8837	NA	24.136	NA	NA	24.3761	23.7943	23.7128	NA	23.4975	24.8941	24.2789	24.1368	NA	NA	24.6081	23.508	24.7323	24.3799	NA	23.8396	NA	23.8266	23.9069	NA	24.223
O15269	NA	NA	NA	23.8394	23.6669	23.7001	24.1632	23.3037	23.5716	NA	NA	23.602	NA	23.9194	NA	NA	NA	23.2942	NA	23.6064	24.3707	NA	23.5824	23.3851	23.1714	NA	NA	NA	23.6333	23.7153	23.8984	NA	NA	NA	NA	NA	NA	NA	NA	NA	NA	NA	NA	NA	NA	NA	NA	NA	NA
O15371	NA	24.6954	24.8916	NA	NA	25.5812	25.3092	24.9034	24.8702	23.6715	24.6927	25.1695	NA	24.7686	24.6028	23.9027	24.5279	24.936	24.3373	NA	25.0892	24.7901	24.9711	24.962	NA	24.4366	NA	NA	25.1838	25.1547	24.4873	NA	NA	NA	NA	NA	NA	24.9687	23.4821	24.6447	NA	24.0279	NA	NA	24.0766	24.1311	NA	NA	24.4386
O15400	28.2486	28.3766	27.9491	28.0003	28.2411	28.3278	27.5534	27.7501	27.7818	27.9299	28.4886	27.7531	28.1324	27.8717	27.5378	28.0679	28.0841	27.5025	27.5028	27.5925	27.5815	27.568	27.413	27.8181	28.0574	28.2179	28.4386	28.1376	27.4491	27.5206	27.9643	28.2718	28.6412	28.3598	27.7624	28.153	29.1404	28.8248	28.4729	28.8926	28.9163	28.0501	28.1666	27.3638	27.8117	28.9988	28.4908	28.2501	27.6413
O15488;A0A1W2PQ75	25.4855	25.1609	NA	24.7532	24.6267	24.7499	24.8722	25.8546	NA	25.5868	25.5874	25.9509	26.0885	24.8995	25.6283	26.4182	25.5531	NA	NA	NA	NA	NA	NA	NA	NA	NA	NA	NA	NA	NA	NA	NA	24.1572	24.9957	NA	NA	NA	25.0076	24.1199	25.3892	NA	24.5913	25.6697	NA	25.5312	24.762	24.7514	24.4865	25.1894
O15498	25.2055	25.171	24.4707	25.5657	24.7714	25.7953	25.9036	24.9576	25.7929	24.106	25.0282	23.9638	24.6556	23.0068	23.4696	23.9887	24.0593	24.0245	24.279	24.8977	23.7522	24.2124	23.5901	24.1564	23.8421	25.4434	24.9722	24.7944	23.6571	25.6705	24.9139	24.7337	24.6797	24.7945	24.6399	24.6602	25.3795	25.681	24.2426	24.9047	25.1663	24.7325	NA	24.4303	24.4021	24.578	24.5614	NA	24.998
O15511;B1ALC0	28.5007	27.4827	27.3006	27.1055	27.8652	27.7758	28.932	27.974	28.2016	27.886	26.1143	27.4697	26.0337	NA	27.3314	26.9788	27.51	28.773	28.3336	27.8441	28.0669	NA	27.7488	27.2086	NA	26.5868	26.1442	NA	28.054	29.1337	27.5508	28.0584	28.4588	27.2799	27.5937	28.043	26.9101	26.5954	27.4828	24.9383	27.6248	NA	26.5238	27.7445	NA	28.2092	25.5254	NA	28.6306
O43143	23.9841	23.6958	24.5624	24.4737	24.5046	24.0916	24.7286	25.1136	NA	24.3032	23.8548	24.3915	23.6126	23.4779	23.819	23.8043	NA	24.4347	NA	23.3111	24.4518	24.1159	25.2889	25.1069	24.058	24.3379	23.3323	NA	24.0516	24.8573	23.9358	23.3991	24.0366	NA	23.8985	NA	NA	24.2379	23.964	NA	24.6353	24.9846	23.8295	24.4701	NA	24.0401	23.5016	24.9166	24.074
O43181	24.0006	NA	23.9297	NA	23.9763	23.8132	24.4593	24.2336	24.8976	24.6878	24.7934	NA	25.1378	24.8747	24.6939	25.1802	24.3006	NA	NA	NA	NA	NA	NA	NA	NA	NA	NA	NA	NA	NA	NA	NA	NA	NA	24.4964	24.6483	NA	NA	NA	NA	NA	NA	24.2536	24.0646	24.7986	24.2107	23.6926	NA	24.4646
O43237;J3KRI4	25.985	25.9078	26.6794	25.8542	25.7952	25.0804	26.3016	26.084	25.7912	25.6409	25.5351	25.7177	25.924	25.8805	25.9682	25.9572	26.0471	25.3306	24.9338	25.2208	25.7995	25.4883	25.6718	25.6733	25.4711	24.7127	25.3885	NA	26.0282	25.8646	24.5902	25.4587	25.7635	25.4666	26.2344	25.6333	24.9214	24.1899	25.8943	25.8482	25.542	25.0066	26.1921	25.526	25.2551	25.4391	25.2029	24.8719	24.9181
O43242	27.0985	27.3482	27.8691	26.8073	26.4348	26.9286	27.6376	27.1468	26.683	27.0008	27.1901	26.763	26.9757	26.9431	27.122	26.7359	26.3902	27.5718	27.7004	27.7908	26.9356	27.9708	27.4743	26.9327	27.5374	27.3542	27.0035	NA	27.0539	26.6763	27.0533	25.8067	27.7331	27.9588	27.768	26.8973	26.6718	26.323	27.5155	27.228	27.2981	26.6401	26.9092	26.8493	26.8933	27.1832	26.8525	27.0136	24.9102
O43264;F5H3C1	26.3452	NA	26.2714	NA	26.3844	26.1156	26.6761	26.6807	26.0716	NA	NA	NA	NA	NA	NA	26.3766	26.002	26.8749	NA	NA	25.7905	NA	25.7095	26.1768	25.417	26.4441	NA	NA	25.9872	26.1082	NA	NA	26.5014	NA	NA	NA	25.9683	NA	NA	26.5293	NA	26.5904	26.4143	25.7511	26.4266	26.3102	26.5719	26.7915	26.4559
O43294	26.8037	25.8202	25.4871	26.1851	25.1932	25.4734	24.3175	25.1349	24.7671	25.7133	24.8058	25.8369	25.4254	25.3569	26.4415	25.916	25.3994	24.3855	25.3272	24.3379	25.7055	27.2611	25.9148	26.5277	27.487	25.1728	24.988	25.198	25.5852	25.0321	25.9874	26.4891	25.3135	26.7728	23.6302	23.6107	NA	25.4883	25.2801	25.5403	NA	26.0708	23.6983	26.8671	26.1552	24.646	26.9849	27.0929	23.9775
O43301;A0A1B0GTF3	29.9848	29.3068	29.7881	29.5914	30.359	29.4655	29.7333	30.3541	30.069	30.5451	30.2463	29.905	30.0736	29.7034	29.6762	29.4868	29.1053	29.1231	27.9562	28.581	29.1828	29.4899	28.7204	29.1784	28.7328	29.5915	29.4398	28.8257	30.2826	28.7022	28.7858	29.5157	30.0583	29.8787	30.401	29.8882	30.1286	29.5607	29.9388	30.2721	30.1141	29.2543	29.4093	28.6925	29.2877	29.3836	28.9744	28.3596	28.9366
O43324;D6RBD7;C9J1V9;H0YAL7;D6RCQ0	23.6333	23.8064	23.1316	24.271	23.7775	23.8474	24.4126	24.647	NA	24.5884	24.3253	24.5556	24.6265	24.4737	24.0555	23.8578	23.8584	NA	NA	NA	NA	NA	NA	NA	NA	NA	NA	NA	NA	NA	NA	NA	24.1964	24.0597	24.8371	25.0645	24.7708	25.0909	24.3641	25.1165	24.6431	23.7624	NA	24.0653	24.4154	23.43	24.3444	24.5996	23.3069
O43390;B4DT28	25.3284	24.1854	24.1257	25.6332	25.8021	25.6217	25.8377	25.829	25.509	25.9482	25.9949	25.4855	25.8758	26.9304	26.2576	26.2908	25.8321	25.3321	25.4258	25.7065	26.185	25.5973	26.3643	25.7898	25.6776	25.4668	25.002	24.0645	25.8569	26.3893	26.1697	24.9685	24.9916	24.2818	24.8019	25.2604	24.5039	25.815	25.609	24.7798	NA	25.8256	25.2373	27.1649	26.3117	25.6226	26.0255	26.1144	26.5094
O43396;K7ER96;K7EML9	26.9199	26.6871	26.8653	27.0106	26.5897	27.2157	26.7834	26.8408	26.7112	27.1239	27.1009	27.0929	26.896	27.2906	26.2784	26.7388	26.6975	26.6625	27.977	28.098	26.9796	27.5707	26.7655	27.3635	28.0591	27.9095	27.8117	27.5398	26.859	27.2187	27.4769	27.8531	27.0764	26.2772	26.6659	26.5052	26.0858	27.2415	26.2975	26.613	26.6717	26.9185	26.8096	26.8083	27.1755	26.3752	26.6801	26.5866	26.9553
O43399;A0A087WYR3;A0A087WZ51	28.9683	28.9267	29.2431	28.9228	29.0838	28.6424	28.2535	28.6418	27.9444	27.6559	28.5049	28.037	28.9454	29.1612	28.6641	28.6536	29.0122	27.7127	26.6178	27.8498	28.7856	27.9517	28.3484	28.3193	28.2706	28.5075	28.5199	25.5203	29.3776	28.7477	27.9287	28.1901	27.5019	28.1225	28.1214	27.5223	26.66	28.286	28.6143	26.9821	26.9463	28.1534	28.8594	27.7775	28.2571	29.0942	28.4982	28.1503	28.3628
O43488;H3BLU7	28.0692	28.2894	27.6929	27.922	28.4034	28.2001	27.691	27.8264	28.4341	28.6351	28.5221	28.2446	28.3971	28.5021	28.0213	28.1285	28.3162	28.2608	28.4839	28.3642	28.0674	28.6687	27.7091	28.2766	28.937	29.1456	29.0282	28.7269	28.8204	28.1044	28.5117	28.0084	28.7283	28.0864	27.783	28.2687	28.7456	28.6224	28.112	28.3559	28.0467	28.8317	28.4327	28.4534	28.7602	28.8514	28.4775	28.6827	28.6237
O43491	29.9626	29.5365	30.5431	28.5119	29.493	28.9134	30.0617	30.0206	29.3066	30.3982	30.7065	30.6565	30.1453	30.2416	29.9007	29.973	30.1171	29.3596	28.5391	29.1421	29.1378	29.4164	29.4796	29.0266	28.7185	28.9233	29.3696	29.2792	29.9305	29.505	28.3504	29.5019	30.2432	29.6051	30.6724	28.7791	29.359	28.9322	30.1903	29.7957	29.4425	29.7717	31.0885	29.5595	29.8128	30.5673	29.522	29.7119	29.4181
O43493	23.9252	NA	NA	23.9722	23.8224	24.3839	23.9429	23.517	NA	23.7136	23.6574	24.4291	24.0531	24.8385	24.1049	24.6386	24.2256	23.8626	NA	23.2964	23.666	23.9535	23.3844	23.1597	23.4057	NA	NA	NA	23.7742	NA	NA	NA	25.1434	24.8328	23.6127	23.9329	24.8822	24.5749	24.5474	23.7422	24.3692	22.2397	23.7396	NA	NA	NA	23.244	NA	NA
O43504;R4GMU8;E9PLX3;A0A0C4DGV4	25.8001	25.1674	25.5948	25.851	26.4985	NA	24.3758	25.6205	NA	25.9528	25.7203	25.4721	25.4253	25.8192	25.9294	25.6474	25.3088	NA	NA	NA	NA	NA	NA	NA	NA	NA	NA	NA	NA	NA	NA	NA	26.8356	25.9831	26.4243	26.0166	26.957	NA	26.7563	26.3991	25.4196	24.786	26.2397	25.5911	NA	25.8014	25.6289	25.8448	25.6024
O43592	25.2256	24.2436	25.2395	24.8649	25.0173	23.4293	25.5516	25.6717	25.3573	24.5898	25.2724	24.5287	24.425	24.1414	24.2334	24.0413	23.9357	23.5205	NA	NA	24.4485	24.2708	24.5343	NA	24.9883	23.9639	23.5079	25.1801	24.3391	23.9204	23.797	24.8522	24.6787	24.222	24.7392	24.3713	24.6645	24.4093	NA	25.1816	NA	25.3227	24.0956	23.9666	24.3833	24.0166	23.0921	23.6257	24.1113
O43615;M0QXU7	NA	NA	24.4908	24.2751	23.8093	23.8253	23.5719	NA	NA	24.2278	24.3335	24.4144	24.5927	23.354	24.5248	23.75	23.5129	NA	NA	NA	NA	NA	NA	NA	NA	NA	NA	NA	NA	NA	NA	NA	23.9685	23.9295	NA	24.6056	NA	24.2431	24.0489	NA	NA	23.6327	24.3114	NA	24.0556	24.1397	23.6737	24.8035	24.2032
O43674;E7EWP0;H0Y886;A0A087WYD0	24.9427	NA	NA	NA	25.1312	24.8861	25.0422	24.5919	25.9161	NA	NA	NA	NA	NA	NA	NA	NA	NA	NA	NA	NA	NA	NA	NA	NA	NA	NA	NA	NA	NA	NA	NA	25.7746	24.4052	25.8096	NA	NA	NA	NA	25.3914	NA	25.405	25.2282	25.001	NA	NA	25.2144	25.1078	NA
O43676;C9JKQ2	25.8762	26.5642	26.7988	25.4881	26.4233	25.3195	26.3036	26.2413	25.6703	26.2226	25.7892	26.521	26.3721	NA	26.7273	26.6	26.1216	NA	NA	NA	NA	NA	NA	NA	NA	NA	NA	NA	NA	NA	NA	NA	25.9202	25.714	26.7527	25.1743	26.947	NA	26.7211	26.9769	NA	26.215	26.3021	26.2432	25.723	25.9867	26.3337	26.1319	26.4384
O43678	26.4839	26.8116	27.5322	25.727	26.7474	26.1651	26.6577	26.8697	26.3295	27.3822	27.1492	27.4443	26.7026	26.1776	27.4577	27.2879	25.7683	NA	NA	NA	NA	NA	NA	NA	NA	NA	NA	NA	NA	NA	NA	NA	26.6461	26.4617	27.8134	26.7687	27.4787	26.9731	27.5077	27.6215	27.1502	26.7006	27.0168	26.406	26.3081	26.188	26.1503	26.6701	26.4396
O43681;A0A087WXS7;K7ERW9	26.7137	25.8928	26.8093	26.0305	26.6203	26.4353	26.2146	25.9764	26.0763	26.1473	26.6952	26.7043	26.5443	26.8154	25.9804	26.8948	26.9521	26.5303	27.1964	26.9056	26.3889	26.3665	26.2785	26.3153	27.0229	27.0979	27.1371	27.2259	26.1312	26.0911	26.5369	26.9755	26.612	26.5794	26.1743	26.1232	26.0234	NA	26.4214	26.0895	25.5233	26.2945	26.2154	25.7117	26.6451	26.5641	26.467	27.111	26.5853
O43684;J3QT28	25.3551	25.6039	24.6154	25.4211	24.8351	25.4207	24.7478	25.2311	24.8243	24.6568	24.7177	24.7689	24.8916	25.0413	24.7174	24.7707	25.0976	25.0099	25.3046	25.0963	25.0499	25.4842	25.7041	25.2278	25.3425	25.2811	25.0365	25.1223	24.7424	25.4883	25.6576	24.3599	25.5359	25.2328	24.5782	25.0265	24.3679	25.7262	25.1831	25.4164	25.1379	25.3726	25.1071	25.7072	25.3306	25.1494	25.6102	25.6461	25.3598
O43707	31.5146	32.1177	31.4032	32.1169	31.9826	32.3774	31.9342	31.785	31.6	32.1453	31.8212	32.1099	31.7588	32.5328	32.2031	32.0314	31.7371	31.4424	31.5567	31.4348	31.7696	31.9785	31.553	31.8261	31.7651	32.336	31.6787	32.3461	31.9271	32.3167	32.7514	31.6316	31.7057	31.8825	31.5792	32.2219	31.8974	32.3061	32.022	31.7659	31.4685	32.2393	32.2606	32.881	32.0347	32.5042	32.719	32.3359	32.4223
O43747	26.9466	26.9317	27.0357	26.6511	26.8629	26.826	27.2592	26.9201	26.3293	26.5728	26.2211	26.2182	26.1628	26.5857	26.7899	26.3501	26.4628	26.9249	26.4416	26.7093	26.6304	26.1954	26.8693	26.6448	23.9705	26.2064	25.7182	25.465	26.3467	25.7536	26.0243	26.7221	25.6577	26.0078	26.1834	25.708	26.3205	26.154	26.6434	26.3585	26.5868	26.0095	26.5002	26.4454	25.5446	25.8	25.5939	25.8404	26.0729
O43760;K7ELD9;K7ENG9;K7ELS8	26.8141	28.4082	28.4362	27.0164	27.5523	27.8462	28.3317	27.678	27.9197	27.5293	27.7868	27.1785	28.1168	27.378	27.2917	27.3077	27.939	27.7207	26.7657	27.0085	27.3834	27.7919	26.7735	27.0726	27.0963	27.1233	25.8065	25.4685	27.0579	27.189	26.1977	26.6667	26.4457	26.1282	23.8359	26.9984	27.7691	27.6649	26.8581	27.8761	28.3685	26.5218	25.6421	25.7833	26.5018	27.0525	27.351	26.8481	26.8486
O43765;K7EMD6	24.621	24.539	24.3562	24.1479	24.3384	24.6	24.2944	24.4901	24.6153	23.5457	24.1204	23.9433	24.2209	24.5308	24.4782	24.3574	24.6065	24.3812	25.6277	25.6701	24.442	NA	NA	24.5966	25.3685	24.9875	24.8026	NA	NA	24.7568	24.0918	25.0955	NA	NA	NA	NA	NA	NA	24.241	NA	24.9119	24.9124	NA	25.1823	25.2622	25.0568	24.7972	25.0638	24.4973
O43772;C9JPE1	27.8061	27.5261	27.7715	27.6186	28.1277	27.6055	27.1068	27.9108	27.8578	26.9552	26.8631	27.1715	27.4758	27.7683	28.0885	27.3696	27.6971	27.4759	27.7654	27.2177	28.4825	26.8667	28.2212	27.9886	27.1856	27.8386	27.6027	26.1894	28.7416	27.7084	28.0728	26.0217	25.3957	26.1673	27.2791	27.4585	26.9792	27.0827	27.0655	26.3153	26.7106	26.318	26.8517	25.7899	27.338	27.7458	27.7796	25.4345	26.7182
O43776	27.4912	26.2789	27.2907	27.0674	27.173	26.959	27.3096	26.6594	26.2757	27.2342	26.8597	26.8449	26.9815	27.2831	27.0514	27.0644	27.0765	27.6673	26.9972	27.595	28.0463	27.8914	28.1386	27.8248	27.0952	27.597	26.82	26.4728	27.805	27.7837	28.0613	24.0726	25.802	27.0153	27.3856	27.1282	26.897	27.0132	27.2881	26.953	28.0728	26.2601	25.4037	26.2849	26.0813	26.1048	26.1358	26.064	26.2215
O43809;H3BND3	25.5601	25.7252	25.3419	25.2867	25.558	25.8754	25.9082	25.8322	NA	25.4362	25.5525	25.7985	25.4851	25.2348	25.3548	25.2827	25.397	25.9247	25.6075	NA	25.5591	25.6233	26.0751	25.4094	NA	25.1959	25.9081	NA	25.6626	26.0451	25.9282	NA	25.1579	24.1344	NA	NA	NA	25.5029	25.7285	NA	NA	25.8731	26.4604	NA	NA	25.4569	25.229	25.1738	25.7845
O43813;E9PHS0	27.1885	27.6649	27.3822	27.5367	27.5079	27.5987	27.0596	27.0335	27.4495	27.2116	27.2968	27.0535	27.3838	27.6893	27.0473	27.4083	27.9307	27.2076	27.6732	27.8885	27.7362	27.5287	27.3333	28.1466	28.6094	27.7438	28.1425	27.442	27.4288	26.5679	27.5161	27.1408	27.4453	26.973	27.0072	27.4606	27.0654	27.5699	27.548	27.0579	27.5235	27.8262	27.5426	27.856	27.9391	27.5556	27.704	28.1422	27.896
O43815	23.5915	23.8497	NA	23.4315	NA	NA	23.6606	23.9723	NA	NA	24.1594	23.6127	23.7194	23.6633	23.9988	23.6285	NA	NA	NA	NA	NA	NA	NA	NA	NA	NA	NA	NA	NA	NA	NA	NA	NA	NA	NA	NA	NA	NA	NA	NA	NA	NA	NA	NA	NA	NA	NA	NA	NA
O43852	27.186	26.1527	27.4988	26.025	26.8096	NA	27.7881	27.24	27.159	27.8094	27.9267	28.0522	28.3629	26.6406	27.1635	27.7704	26.8363	26.9897	26.6254	27.1783	27.0054	27.2154	27.1243	27.0498	26.4419	27.2156	27.1288	27.3881	27.7696	27.4323	26.4452	27.7509	28.012	27.8252	28.0074	25.7045	26.5397	NA	27.6416	27.3424	25.6742	25.9728	27.9081	25.3434	25.7866	25.9799	NA	25.9296	25.1037
O43865;H0Y8B3;Q96HN2	27.7288	27.7813	27.6616	28.5148	27.6758	27.8315	27.0197	27.295	27.4865	26.2308	27.1531	27.1708	27.3435	25.7759	26.1096	26.4994	26.983	25.5169	25.4262	26.263	25.2216	25.4862	25.5121	25.8209	25.8947	27.2407	27.3607	NA	26.103	26.7042	27.4208	28.1949	26.8165	27.8864	26.9515	27.7619	28.064	28.2739	27.4161	27.6635	27.9698	27.7229	27.015	27.9475	27.539	27.7395	27.9205	27.2758	27.4396
O43866	27.9851	26.4242	26.6611	26.5094	25.9798	26.8494	25.997	25.4985	NA	27.4381	28.1048	27.0163	27.9721	27.2244	23.8154	27.0137	28.7203	25.4635	28.4343	28.3002	24.0543	26.735	25.2805	26.4604	25.6026	28.2172	28.3703	29.3706	25.2382	24.5306	24.7083	29.1108	27.7585	25.9186	25.7922	26.608	25.3739	26.5881	26.4292	24.7992	25.1087	28.4503	28.5783	27.5065	29.0735	28.0638	25.4974	27.1573	27.5327
O43895	NA	NA	NA	NA	NA	NA	NA	NA	NA	NA	NA	NA	NA	NA	NA	NA	NA	22.2576	23.2024	22.9008	23.245	22.3676	24.587	23.7214	22.6249	22.4492	22.8509	NA	22.3796	22.6471	23.2506	NA	NA	NA	NA	NA	NA	NA	NA	NA	NA	NA	NA	NA	NA	NA	NA	NA	NA
O43920	26.1755	26.6429	26.8561	26.621	26.6655	26.3429	26.4761	25.7067	26.2403	26.4479	26.7131	26.7517	26.8014	26.4394	26.9743	27.0917	26.928	25.8975	NA	NA	26.3362	NA	26.2963	27.0128	25.7811	NA	NA	NA	27.0468	26.4098	26.3838	26.0465	26.7257	26.514	27.0801	26.3011	27.2655	26.2381	26.257	27.2803	27.2229	26.4558	25.17	26.126	25.4828	26.1362	25.9594	NA	25.7315
O60218	NA	NA	NA	NA	NA	NA	NA	NA	NA	NA	NA	NA	NA	NA	NA	NA	NA	NA	NA	NA	NA	NA	NA	NA	NA	NA	NA	NA	NA	NA	NA	NA	NA	19.6903	19.5011	NA	NA	NA	NA	NA	NA	19.3792	19.4971	NA	NA	19.8589	19.6109	20.1825	NA
O60234;M0QYJ8;M0QX47;M0QYG8;M0R1D2;M0R0C1	25.4551	25.2365	25.378	24.5369	25.1057	NA	25.6822	NA	25.5522	NA	24.8216	NA	NA	NA	24.9985	NA	NA	NA	NA	NA	NA	NA	NA	NA	NA	NA	NA	NA	NA	NA	NA	NA	NA	NA	NA	NA	NA	NA	NA	NA	NA	NA	NA	NA	NA	NA	NA	NA	NA
O60237;E1CKY7	NA	NA	NA	NA	NA	NA	NA	NA	NA	NA	NA	NA	NA	NA	NA	NA	NA	NA	NA	NA	NA	NA	NA	NA	NA	NA	NA	NA	NA	NA	NA	NA	28.9672	28.8598	28.5623	NA	NA	NA	NA	NA	NA	30.3648	30.3188	NA	29.6722	30.8558	28.6341	NA	30.0486
O60240	33.3437	33.5732	33.8937	34.0274	34.117	33.696	33.3788	34.2366	33.6724	33.8906	32.567	34.3065	34.0899	33.6016	34.0589	34.0035	34.1411	33.186	32.9784	33.3689	34.862	33.8658	33.5973	34.5452	33.9592	34.1759	34.5216	33.0548	34.9061	33.7402	33.3443	33.8102	34.4256	33.3089	33.5732	33.9365	33.9714	33.9605	33.5752	34.3724	33.7649	33.6267	33.9833	33.5534	34.1955	34.5873	34.3003	34.2305	33.7193
O60256;E7EPA1;C9JJS3;C9K0K7;I3L0S1;C9JDU5	NA	24.3983	23.2021	NA	24.1707	24.1467	23.8488	23.8141	24.7756	24.296	23.7745	23.6573	24.6596	24.1243	24.2159	24.45	24.4122	23.5327	25.9282	25.8096	NA	24.7574	24.2098	23.1771	25.1338	24.666	25.2624	24.4817	23.7227	23.7913	24.5691	25.4386	24.0972	24.7553	NA	24.3436	23.7401	24.2893	23.7488	23.8738	NA	24.458	24.0835	24.273	24.6186	23.6458	24.6974	24.6397	24.0326
O60271;A0A087X2D8	25.4167	24.9279	25.1268	24.4645	24.9528	24.331	24.7337	24.9923	NA	24.438	24.9563	25.3904	24.6425	24.051	24.735	24.1391	24.3795	24.8264	NA	24.1072	23.9763	23.9713	24.9601	23.5893	24.2122	24.3014	23.6469	NA	24.4375	26.1148	23.7987	NA	24.6001	25.1631	24.4358	24.2754	24.6872	24.9447	23.9591	23.9329	24.2184	24.2168	24.956	23.6435	25.0454	24.2617	23.9286	23.9145	24.0462
O60313;A0A2R8YDM2;A0A2R8YE78;C9JMB8;A0A2R8YGE5;A0A2R8YD53	26.4856	25.426	27.2984	25.9072	26.6721	26.0896	27.2359	26.5493	26.253	27.4583	27.4871	27.286	27.3926	26.6637	27.333	27.312	26.5994	27.311	26.0962	25.7714	26.661	26.7734	25.4162	26.2058	25.813	26.741	26.5036	25.4848	27.2465	25.8851	26.5236	26.583	26.8601	26.7126	27.1514	23.9607	26.2414	24.3356	26.3928	25.9019	26.5759	26.3284	27.0441	25.0458	25.7488	26.0637	25.7335	25.4145	24.8877
O60437;K7EKI8;K7EQ71	27.45	28.0846	25.9276	26.8593	28.0338	27.8022	26.4378	27.2541	28.0125	28.9282	28.4526	27.63	28.1133	28.7167	28.4608	28.536	27.2024	29.6076	29.3698	29.1249	29.8928	29.1573	30.4657	29.662	30.1385	29.0529	28.837	29.6527	28.6047	29.9163	29.8444	29.1015	27.0042	27.871	26.9778	27.4804	27.9803	27.5656	26.3847	26.979	28.031	29.0478	29.8793	29.7452	28.6705	28.7201	28.3789	29.7332	30.2304
O60443;C9JSR4	NA	23.2254	NA	NA	22.8022	22.7336	22.9505	23.2372	NA	NA	NA	NA	NA	NA	23.7518	NA	NA	NA	NA	NA	NA	NA	NA	NA	NA	NA	NA	NA	NA	NA	NA	NA	NA	NA	NA	NA	NA	NA	NA	NA	NA	22.8839	23.2657	23.4534	NA	23.2088	NA	24.0677	23.3989
O60462	25.1881	24.8951	25.3486	25.4367	25.0812	25.3993	25.2797	23.8556	24.9177	24.35	23.2914	25.0553	24.764	26.2147	24.0279	23.2836	24.1781	NA	NA	NA	NA	NA	NA	NA	NA	NA	NA	NA	NA	NA	NA	NA	24.375	23.6743	24.8457	24.217	25.56	25.0231	25.19	24.6948	24.7158	25.2774	NA	24.3551	NA	23.8665	NA	NA	NA
O60488	26.8995	26.4264	26.8482	26.9418	27.1596	26.2414	26.4456	27.0462	26.0373	27.6104	26.6363	26.3387	26.9762	27.277	26.2081	25.6429	25.9002	26.7123	25.245	25.4949	26.8781	27.4676	27.4095	27.1358	26.7298	26.867	25.9895	25.2519	27.7899	26.8404	26.2626	26.578	25.3361	24.1189	25.6183	25.8648	26.7367	25.7723	25.5638	26.1199	26.2492	26.6147	25.2235	25.7679	25.4308	25.8543	25.719	25.1313	25.653
O60493	29.1423	29.3372	28.9476	28.8471	28.6092	28.5461	29.665	28.723	29.0582	28.8958	28.8598	29.1303	29.1231	29.012	28.857	28.467	28.7423	29.2635	28.2096	28.2686	28.9436	28.4325	29.0535	28.73	28.1109	28.4198	28.7785	27.7723	29.1814	28.804	28.5914	28.4919	29.5724	28.9727	29.77	29.3267	29.3932	28.7844	28.5995	29.6732	28.5951	28.268	28.8783	28.5666	28.2138	28.7356	28.0855	27.8693	27.9806
O60502	23.682	23.8641	24.6036	24.0716	NA	NA	24.5309	NA	23.4758	24.1648	24.8535	24.4552	24.3446	24.1941	23.9542	24.2139	24.4019	NA	NA	NA	NA	NA	NA	NA	NA	NA	NA	NA	NA	NA	NA	NA	NA	NA	NA	NA	NA	NA	NA	NA	NA	NA	NA	NA	NA	NA	NA	NA	NA
O60504;H0YB51	24.9382	25.1948	NA	NA	NA	25.7186	24.8665	25.4532	24.6036	25.1382	24.8671	25.179	NA	25.0964	25.3113	25.1901	25.2423	25.2629	25.0563	24.6795	25.4693	25.7683	25.2359	25.9957	25.8699	25.7596	NA	NA	25.3252	25.2938	26.2822	NA	NA	NA	NA	25.9252	25.5994	NA	25.2268	NA	NA	24.2194	25.09	25.497	NA	25.0742	25.4079	25.6865	25.6788
O60506;B7Z645	27.5316	27.3693	27.5898	27.9003	27.1752	28.0598	27.4665	27.5144	27.058	27.2937	27.2136	27.7277	27.2991	27.7502	27.4393	27.1233	27.5968	27.4189	27.8321	27.4123	27.4451	27.4084	27.8289	27.8529	27.1085	27.7218	27.525	27.4284	27.6385	28.3444	28.273	27.4647	27.6017	26.7796	27.5093	27.8919	25.9926	27.9529	27.4078	26.7275	27.1728	28.0501	27.7615	28.0762	27.817	27.93	28.0043	27.8134	28.6385
O60547	22.6039	22.8733	23.6528	22.9269	23.0565	23.5175	24.6591	22.4667	23.4558	22.831	NA	22.2175	22.6961	23.2315	22.8714	23.7962	22.6948	22.8842	23.9391	NA	23.1675	22.2932	21.6988	22.7009	24.1906	NA	NA	NA	22.9812	22.9012	NA	NA	NA	22.7427	NA	23.1663	NA	NA	23.8112	NA	NA	24.223	23.3704	24.249	NA	22.9454	23.7188	23.3387	22.932
O60565;Q9H772	NA	NA	NA	NA	NA	NA	NA	NA	NA	NA	NA	NA	NA	NA	NA	NA	NA	NA	NA	NA	NA	NA	NA	NA	NA	NA	NA	NA	NA	NA	NA	NA	23.8248	24.6572	24.0753	23.727	24.2681	NA	NA	NA	NA	23.3555	NA	NA	NA	24.2433	24.6784	NA	NA
O60568	25.4975	25.8175	25.4146	25.505	25.162	25.5712	25.5056	25.4862	25.3565	25.2232	25.1063	25.1898	24.6635	25.1333	25.7134	24.6368	25.2877	25.6187	25.2394	24.9909	24.9006	25.636	25.7875	25.4698	25.8333	24.8915	25.067	NA	25.3819	26.4209	25.1659	24.8235	25.1778	25.6224	25.0684	NA	25.3359	25.6372	25.6221	25.548	26.27	25.2333	25.049	25.1996	24.5556	25.4429	24.983	25.124	24.8224
O60664;K7ERZ3	28.2101	27.9919	27.8809	28.0457	27.9356	27.7033	28.481	27.3214	27.5113	27.305	27.7009	27.4803	27.832	27.5871	26.8868	27.5103	27.7104	28.2979	27.9366	28.0563	28.1147	27.8067	28.9482	28.2096	28.174	27.8931	27.9331	25.9034	28.0041	28.5701	27.6879	27.3716	27.8347	28.3762	27.6453	28.0119	27.4574	27.4732	28.7312	27.7729	27.7081	27.9162	27.8528	27.9542	27.7153	28.2093	28.1451	28.1396	28.0101
O60669	24.4752	24.4957	25.1382	24.9649	25.7149	25.1372	25.0054	24.9932	25.239	23.8479	25.1129	24.2755	26.2324	23.2284	24.9682	24.8532	25.2987	22.4436	NA	NA	NA	NA	NA	NA	NA	24.2786	24.3836	NA	24.3766	23.8628	24.6899	NA	24.5424	24.1894	NA	24.4546	24.9731	NA	22.2759	24.0548	25.7232	24.1145	NA	24.5127	25.5244	NA	26.3151	24.7547	25.6797
O60701	28.5203	28.6605	28.9342	28.2737	27.2983	28.8731	28.992	27.7063	27.6675	27.5341	26.8281	27.8727	27.0582	27.5054	27.3476	27.324	27.3486	28.2544	28.1499	28.0891	26.9727	27.5161	28.3191	27.5407	27.1396	26.724	26.3951	23.2114	27.0824	28.3501	27.335	27.3055	27.9822	27.7537	28.0122	27.6197	27.7359	28.4731	29.1683	27.5636	26.8189	27.5136	26.0845	26.5076	25.8448	26.1015	27.1049	26.809	26.6889
O60749	27.7964	28.2266	28.3074	27.8163	27.791	27.97	28.314	27.7349	27.8639	27.0609	27.2969	27.3775	27.1436	27.4254	27.7348	27.4146	27.5002	27.7483	27.53	27.6533	27.4543	27.177	27.545	27.9626	27.9265	27.3739	27.4203	28.0868	27.5203	27.7949	27.8791	27.283	27.851	27.417	28.0821	27.5313	27.8894	28.0662	28.2657	27.9668	27.6539	27.4751	27.1143	27.8144	27.117	27.5444	27.5175	27.6301	27.9756
O60763	27.8406	27.7565	28.3731	27.8837	27.6013	27.5222	28.7325	27.7324	27.6759	28.1319	27.8568	28.2372	28.2469	28.0623	27.9945	27.7627	27.5194	28.6261	27.9993	27.8928	28.0932	27.7479	27.8711	27.9398	26.0554	27.5435	27.3815	27.6751	27.6437	27.6973	27.2086	27.4512	28.1513	28.4397	28.1754	28.2504	28.2784	27.5181	28.7122	28.1519	28.2391	27.7724	28.0645	27.9526	27.1927	27.9812	27.9015	27.1006	27.5204
O60784;B0QY01	25.8178	24.2862	25.1833	25.6663	25.4759	24.839	25.801	26.062	25.4437	25.4894	26.1292	26.0964	25.8198	25.6119	24.9833	25.4124	25.0912	25.7262	24.9069	25.3242	26.1342	25.6411	26.136	26.4805	26.0879	24.5294	25.4355	26.1157	26.4233	26.3034	24.991	25.1496	24.9911	24.4588	25.1118	24.4859	24.112	24.1497	26.0123	25.6979	25.6114	25.2345	25.3537	25.8592	25.3623	25.0809	24.1288	25.1887	24.5616
O60826	23.8305	NA	25.0689	23.3647	23.5603	24.0094	25.0552	24.6467	NA	23.2958	23.9821	24.3806	23.268	24.2735	25.2978	24.1539	23.7671	25.1629	24.2405	NA	25.101	24.8541	25.1394	23.9916	24.7025	NA	23.4182	NA	24.1614	25.067	24.1862	NA	23.494	24.6354	24.7828	24.3575	24.5218	NA	25.6139	24.7245	24.3327	24.0856	23.0994	24.2032	NA	NA	23.22	24.0445	NA
O60869	25.6938	25.4988	25.7826	NA	25.3457	NA	25.0721	25.2551	NA	NA	25.7831	25.5844	NA	NA	24.9694	NA	25.4614	NA	NA	NA	NA	NA	NA	NA	NA	NA	NA	NA	NA	NA	NA	NA	NA	NA	NA	NA	NA	NA	NA	NA	NA	NA	NA	NA	NA	NA	NA	NA	NA
O60884	26.2833	27.1433	26.6828	26.3193	26.4761	26.5993	26.4801	26.4254	26.5092	27.0081	27.2791	26.9447	26.9614	26.9904	26.5705	26.9328	27.1793	26.1245	26.3557	26.4499	26.2335	26.8408	25.5993	25.8794	26.2163	26.4541	26.7257	25.1408	26.4724	26.2843	26.1665	26.0597	26.973	25.8236	26.7262	26.8347	26.8655	26.7413	26.456	26.9476	26.789	26.5201	27.0898	26.801	26.9991	27.3054	26.7227	26.1846	26.6063
O60925;E5RGS4	26.1392	27.1666	26.3116	26.1129	26.5483	26.2564	26.7362	26.5966	NA	26.3115	26.2759	26.4205	26.3421	26.2443	26.7113	26.4375	26.1942	26.737	NA	NA	26.1089	NA	25.5126	26.4885	26.2739	26.2288	NA	26.4431	27.1742	26.2792	26.0432	NA	26.3136	26.5832	26.9715	26.112	26.7995	26.6131	26.9022	27.3811	26.4115	26.0341	26.7873	26.065	NA	26.3342	25.6949	26.5165	26.1965
O75023;A0A0G2JMX5;A0A0G2JPM8;A0A0G2JNP3;A0A0G2JNY7	24.807	25.5238	24.4297	24.8915	25.2986	24.8431	25.0307	24.6294	NA	24.0927	24.0805	24.2199	24.4216	24.0138	25.6643	23.8897	24.138	24.5801	24.7328	24.0971	24.619	NA	25.8153	25.2352	NA	24.0194	NA	NA	24.7344	24.4601	25.3613	NA	23.687	NA	24.4622	24.8579	24.869	24.7576	24.7486	NA	NA	24.633	NA	24.3078	NA	NA	25.0366	NA	25.0612
O75083;D6RD66	30.2547	30.178	29.9704	29.8142	29.7842	29.8098	29.9665	29.4683	29.3302	29.2173	29.031	29.2702	29.1948	29.5916	29.4917	29.5121	29.4371	29.3447	29.1692	29.495	29.6466	30.1426	30.1587	29.7513	30.1722	29.9393	29.779	30.7998	29.6212	30.6168	30.6592	30.2043	30.2591	29.8104	29.4435	29.6385	29.6719	30.1196	29.4255	29.387	30.0677	30.211	29.2949	30.8172	29.9538	30.1073	30.1868	30.2437	30.3963
O75110	23.3398	23.1828	24.1178	23.327	23.4687	23.7752	23.5263	NA	NA	NA	22.4756	NA	NA	NA	NA	NA	NA	NA	NA	NA	NA	NA	NA	NA	NA	NA	NA	NA	NA	NA	NA	NA	NA	NA	NA	NA	NA	NA	NA	NA	NA	NA	NA	NA	NA	NA	NA	NA	NA
O75116;E9PF63;Q14DU5	27.6064	27.8303	27.5149	27.292	27.6067	27.731	27.1001	27.0805	27.5561	28.0663	27.6339	27.4123	27.4448	27.6756	27.6594	27.7654	27.5588	27.3021	27.8056	27.4195	27.4111	27.7247	27.2879	27.4771	27.1931	27.7484	27.3874	26.7731	27.1795	27.4901	27.6424	26.826	27.3398	26.9696	27.8686	27.6667	27.4316	27.8353	27.2414	27.5796	27.7372	27.6645	27.1847	28.1354	27.8992	27.3138	27.1164	27.1314	27.5644
O75131;A0A087WYQ3	27.5592	27.6583	28.0995	27.7087	27.8936	28.8158	26.8249	28.0485	28.27	28.3844	28.0106	28.0111	27.7833	28.3329	27.3959	28.0974	27.798	28.1939	27.6022	27.7573	27.5704	27.8557	26.54	27.3852	27.6887	28.1927	27.8417	28.2318	28.1018	27.9646	28.0668	28.0714	27.8917	27.2489	27.1304	27.6422	27.8526	28.5131	27.349	27.782	27.3796	27.8309	27.0246	28.0245	27.6057	27.7324	27.238	27.7489	27.782
O75165	25.2674	25.0809	25.5089	25.0979	24.8364	23.6924	25.7299	24.9699	24.9172	24.8083	24.5794	24.6762	24.5205	24.4916	25.7726	25.5326	24.4635	25.495	25.0532	25.2956	24.7876	24.6237	25.0679	24.8755	23.7267	23.8884	22.3886	NA	24.2923	23.7847	24.0669	NA	24.9467	24.3577	25.3026	24.6786	24.7375	24.4266	24.8954	24.9331	25.0214	24.2179	NA	23.9602	24.4266	24.3498	23.3471	23.8442	23.1775
O75208;H3BNT2;H3BSJ5;H3BPY0;H3BRC0	24.8741	NA	24.7022	25.0585	25.1293	25.1065	25.1083	24.6686	25.2067	24.4561	24.5662	25.1425	23.9209	25.303	25.0822	25.8008	25.4494	24.7187	24.293	24.3097	25.1275	NA	24.3303	25.4938	25.1837	NA	25.2822	NA	25.3036	24.8709	24.8838	NA	NA	25.3324	NA	NA	NA	24.9873	24.5292	25.2694	NA	25.2227	24.7977	25.2704	25.1825	25.1564	24.9607	25.6987	25.9125
O75223;B8ZZK2;M0QZK8	NA	NA	25.1239	25.2188	24.8776	25.4341	25.7087	25.2387	25.6563	26.2359	25.912	NA	26.4097	25.8782	25.6457	25.6993	NA	25.0866	26.0722	25.8408	25.5488	25.5437	25.6045	25.9076	26.0079	25.93	26.1081	NA	25.7095	25.279	26.2333	26.233	26.0042	25.6335	26.45	25.8912	NA	25.6316	NA	26.1276	26.099	25.9242	25.7612	25.5233	25.6471	25.9581	26.4212	25.9492	26.1473
O75251;F5H5N1;A0A087WXF6;A0A087WTI3;F5GXJ1	25.1368	25.457	25.2653	25.4118	25.0175	25.4359	25.4655	25.3961	25.5672	25.0893	24.6368	25.0796	25.3581	25.2625	25.4519	24.9819	25.1268	25.672	24.9615	NA	25.3433	24.9413	NA	24.603	NA	NA	NA	NA	25.2826	25.0801	25.0144	NA	25.8825	25.8283	25.6941	25.6861	25.7	NA	25.6428	26.0445	26.4168	25.4722	25.1006	NA	NA	25.3719	25.1039	NA	25.1959
O75306	26.8871	26.9417	27.2415	27.0942	27.5209	27.3683	26.8816	27.1305	27.5937	27.1638	26.7374	27.127	27.0358	26.9229	27.1589	27.3519	27.1857	26.8186	26.9417	26.6946	26.8708	27.0772	26.5977	27.0646	27.1384	27.2209	26.6731	NA	27.2419	26.7198	27.4635	25.5081	26.2824	27.2423	26.9855	26.9524	NA	25.7804	26.7222	26.291	NA	27.5355	27.1823	27.1063	27.5006	27.1631	27.4469	27.2957	27.3756
O75323;F8WBI5	26.5663	26.9088	26.0661	26.1509	26.6376	26.69	27.009	26.9375	27.2619	26.4764	26.3805	26.5107	27.0365	26.4725	27.1741	27.0033	26.8098	27.3297	26.3264	26.5293	27.1382	26.6141	26.3317	26.3945	27.6738	26.6034	26.4906	26.7532	27.2527	26.3466	26.8079	26.4926	NA	NA	NA	NA	NA	NA	NA	NA	NA	26.0186	26.5629	26.3677	26.7978	24.9863	26.7457	26.334	26.8403
O75340;A0A024QZ42	26.0999	26.653	26.5499	26.763	26.8128	26.7467	26.7706	27.0737	27.0838	27.2182	26.943	26.8567	27.0256	27.167	26.8831	26.6284	26.8761	27.201	27.3197	27.1598	27.2592	26.6577	25.9391	27.1829	27.2647	27.0146	27.3553	26.9639	27.2021	26.9029	27.1219	NA	27.217	26.6784	27.6497	27.2439	26.5781	27.0042	25.2181	26.3954	25.2186	27.0949	26.8845	27.2472	26.4119	25.8401	26.6782	26.5853	26.9515
O75348	NA	NA	NA	NA	NA	NA	NA	NA	NA	NA	NA	NA	NA	NA	NA	NA	NA	25.9314	23.9686	NA	26.1881	24.3198	25.7656	25.0525	NA	25.6851	NA	NA	27.1698	26.4934	25.7822	NA	25.412	24.1652	25.2467	24.6285	NA	NA	24.8803	25.3559	NA	25.2713	24.6244	23.4489	NA	24.4273	24.3604	24.8646	24.4353
O75351	26.3251	25.9267	26.3491	25.2601	25.6509	25.1591	25.9636	25.7982	26.2025	25.6381	25.4679	25.8853	25.3926	25.6084	25.8049	25.3568	24.8153	25.1278	25.4153	25.4143	25.4849	25.7108	25.5182	25.2457	26.5432	25.0878	25.5285	NA	26.0926	25.9858	24.8514	25.0056	24.4732	25.0104	25.5685	25.7705	24.7826	25.1036	25.516	24.7903	24.8713	25.0178	26.0592	24.0933	24.8412	24.5045	24.685	24.7232	25.5169
O75367;B4DJC3	26.2795	27.2883	26.0855	27.8058	27.8465	28.2036	26.748	26.5039	27.0906	27.1851	27.9694	27.2444	26.803	26.5559	26.5008	27.3067	27.3411	26.1026	26.8131	24.6798	26.3149	26.4606	NA	26.718	27.1011	26.5425	27.0837	25.8034	25.3547	27.3106	27.1951	26.0988	27.2402	27.0536	25.5225	27.9913	26.5352	26.021	27.0035	26.1952	27.6537	27.5383	27.2744	28.7082	26.5205	26.321	27.6877	28.2444	28.2884
O75368	29.1281	29.1093	27.7676	28.3372	28.9327	28.9508	29.013	28.0724	28.3615	28.8463	28.7211	29.0308	28.6309	28.9258	29.0771	28.9515	28.4741	29.5625	28.5451	27.3964	29.6872	29.7938	29.8175	29.6082	29.3214	29.0922	28.8303	30.5168	29.8481	29.8719	29.5358	29.9006	29.5025	29.5286	29.8121	29.319	29.5226	29.3261	29.8282	30.1568	29.3151	29.4836	29.804	30.0688	28.8836	29.6567	29.3164	29.8841	29.7159
O75369;E7EN95	31.8888	32.2362	31.9348	32.1495	31.9978	32.4067	31.8839	31.8014	31.6736	31.9421	31.7561	31.7869	31.5455	32.05	32.048	31.833	31.9182	31.8176	31.5712	31.6275	31.8043	31.8349	31.6534	31.6846	31.7529	32.1539	31.8133	31.6173	31.7441	32.0264	32.5936	31.366	31.7152	31.387	31.8106	32.2158	31.9632	32.5731	32.0393	31.9609	31.9176	32.1429	32.0119	32.6083	31.9228	31.967	32.4438	32.1324	32.5422
O75380;D6RBT3	27.1482	27.6368	27.4671	26.7707	27.1199	26.2051	26.5507	27.224	26.4172	27.5703	27.1834	27.7825	27.687	27.0724	27.7304	27.3611	27.2098	26.8226	NA	NA	26.2687	25.6765	26.6064	26.7921	25.9651	26.0349	NA	NA	28.1174	27.1105	27.091	NA	27.0592	26.2477	27.2326	26.719	27.6745	26.3382	27.263	27.5086	27.0875	26.5206	26.7535	26.861	26.3849	25.8725	26.5047	26.4034	26.4626
O75396	29.0765	29.2414	29.2316	29.25	29.2657	29.2763	29.8751	29.4597	29.507	29.5382	29.5911	29.1843	29.557	29.5214	29.1042	28.8952	29.1464	29.537	29.0379	28.8367	29.4433	29.2865	29.2924	29.3696	29.2053	29.2152	29.0484	28.4428	29.5038	28.7921	28.5238	28.7045	29.696	29.568	30.1893	29.5616	29.3764	29.5713	29.8602	30.3876	29.3201	28.6839	28.9691	28.2196	28.9008	29.1588	28.4001	28.2765	28.4904
O75436;S4R3Q6	27.1856	26.9087	27.2933	27.1571	27.1031	27.1899	27.138	27.3239	27.3613	27.584	27.5237	26.7322	27.0274	27.1731	27.3578	27.5371	27.5837	26.7332	26.7652	26.6271	27.1149	27.2178	27.2683	27.4638	27.2889	27.4378	27.634	27.3881	27.3026	27.0444	27.9749	27.7584	27.1384	27.2172	26.8426	27.3933	26.3612	27.9371	27.5423	27.9746	26.8207	27.1733	26.5497	27.1022	27.4778	27.5813	27.3354	27.5661	27.5708
O75438	NA	NA	NA	NA	NA	NA	NA	NA	NA	NA	NA	NA	NA	NA	NA	NA	NA	NA	NA	NA	NA	NA	NA	NA	NA	NA	NA	NA	NA	NA	NA	NA	NA	NA	NA	24.5628	NA	NA	NA	NA	NA	25.1159	25.1025	25.0941	25.2379	NA	25.2535	NA	25.1498
O75477;B0QZ43	25.1258	25.2022	25.0638	25.4534	25.1633	25.4315	25.0698	25.1573	25.1446	25.1734	25.2372	25.419	NA	25.2439	25.1715	25.6088	25.4582	24.6901	24.7805	24.9219	25.2151	25.1638	24.6821	24.8384	24.8321	25.3203	NA	25.7907	25.1107	25.4538	25.4093	NA	25.3552	24.985	24.6467	24.5617	25.1204	25.5254	25.4025	25.6022	25.6912	25.335	25.3328	25.1754	25.1103	25.608	25.7008	25.3558	25.3709
O75489	25.5433	26.1599	25.9517	26.0633	26.5358	26.5102	26.3671	27.0902	27.3217	26.1147	26.1168	26.1743	26.3217	26.5634	26.5719	27.2518	26.5528	26.9239	26.7118	27.0254	27.0502	26.8228	27.3566	26.7124	27.0511	26.3284	25.5006	25.0351	27.0898	26.7025	26.8039	26.5121	NA	25.0029	24.604	23.8388	NA	NA	26.6213	NA	NA	25.9287	26.2073	27.2484	26.9065	25.0839	26.5012	26.4183	26.8146
O75531	26.5526	26.2867	26.6176	26.2432	25.7017	26.2762	25.714	25.566	26.0666	27.5753	27.231	26.7996	26.5548	26.7918	26.5948	27.1211	26.5833	27.4193	NA	25.4421	28.4022	NA	NA	28.1035	27.9446	26.6142	26.7676	26.1406	26.9655	27.5046	27.0767	26.6882	27.1703	27.7951	26.1858	26.0262	26.3403	26.9036	26.5855	25.7262	27.5734	26.8054	26.6998	27.34	26.8682	26.3798	25.9385	27.2693	25.4468
O75533	24.5555	24.0758	24.8951	24.1116	24.4116	23.7758	25.6349	24.8311	23.1573	25.8597	25.754	25.6151	24.8732	25.0991	25.6305	25.4315	24.9851	25.8907	24.2496	23.9984	25.3964	24.1916	26.0642	25.6902	23.1249	24.4614	24.2124	NA	25.3501	25.0138	23.6708	NA	24.6241	25.1508	25.6746	23.8451	22.7859	NA	24.6819	24.4774	24.4444	25.5084	25.617	25.0794	25.1569	25.0094	24.9951	25.3815	23.8558
O75534;E9PLT0	25.2009	24.9275	25.826	25.7902	25.212	25.7732	25.4247	25.2991	25.9436	24.6078	24.78	24.8824	24.6723	25.5953	24.9441	24.9605	24.9203	25.354	NA	NA	25.0448	24.6383	25.0695	24.4896	NA	25.0963	25.0042	NA	24.9724	24.8209	24.5991	NA	24.8831	24.8001	25.1942	24.9094	25.1531	24.9426	24.8897	24.8012	25.4245	24.7474	24.7157	24.8746	24.8259	24.8097	24.0019	NA	NA
O75558	NA	NA	24.7325	24.1937	24.5	24.5524	NA	24.9092	24.1598	25.8764	25.8297	25.158	25.7037	24.7422	24.9263	25.648	NA	NA	NA	NA	NA	NA	NA	NA	NA	NA	NA	NA	NA	NA	NA	NA	25.3266	NA	24.8955	24.5743	NA	24.347	24.3213	24.6781	NA	24.2803	25.0234	24.377	24.9674	25.1663	24.4784	24.4652	25.4926
O75569	NA	NA	23.1895	NA	NA	NA	NA	23.6453	NA	23.3912	NA	23.4766	NA	22.7863	23.4057	23.3233	NA	23.6146	NA	NA	24.3442	23.2181	NA	22.92	23.1379	NA	NA	NA	22.9564	22.6505	NA	NA	NA	NA	NA	NA	NA	NA	NA	NA	NA	NA	NA	NA	NA	NA	NA	NA	NA
O75592;H7C3U4	24.8443	NA	24.3868	24.358	NA	NA	23.9396	23.9423	NA	NA	24.5625	NA	NA	23.3666	24.8576	24.014	23.7405	NA	NA	NA	NA	NA	NA	NA	NA	NA	NA	NA	NA	NA	NA	NA	NA	NA	NA	NA	NA	NA	NA	NA	NA	NA	NA	NA	NA	NA	NA	NA	NA
O75636	25.9167	25.8728	24.5633	25.6523	24.366	25.519	24.4091	23.6075	23.8276	25.8436	25.7274	23.8916	25.7651	25.3199	NA	25.6822	26.4648	24.2709	27.9127	27.5738	23.607	25.573	25.4153	24.8912	25.523	26.766	26.8476	25.9408	23.544	23.5515	NA	27.0657	25.8221	25.7216	24.6561	25.0312	24.7353	25.5853	23.8392	24.325	NA	24.9497	26.0906	24.4109	26.6087	25.5669	NA	25.2836	25.3264
O75643	23.4777	23.5994	23.3774	23.827	23.5735	24.2009	23.7224	23.8272	NA	23.3587	23.5066	23.7966	23.5056	23.2276	23.552	23.6371	23.2469	23.4445	23.3441	NA	23.8183	23.5374	24.4928	NA	NA	23.3858	23.7922	NA	23.2875	24.2303	23.8656	NA	23.8226	NA	NA	NA	NA	NA	NA	NA	NA	23.4244	NA	23.1416	23.3953	23.0362	NA	23.7036	NA
O75695	NA	24.8234	24.4234	NA	24.0963	25.0995	24.3143	23.6464	24.6139	23.4901	23.635	23.2088	23.4263	23.5316	23.8163	23.9501	23.4439	23.5822	NA	NA	23.9462	24.5022	24.2872	24.1109	24.3043	24.23	24.4706	NA	23.4067	24.2486	24.2786	NA	23.0113	NA	23.4392	24.0444	NA	24.2233	NA	24.011	23.639	23.4441	22.6142	23.6231	NA	23.0029	23.1384	23.2591	23.4951
O75746	25.1702	24.188	25.6273	25.2286	25.5136	25.4706	25.5903	26.1996	25.0546	25.248	24.4807	24.9969	24.9414	24.8186	25.8312	25.3876	24.3231	25.8289	24.7474	NA	25.9796	26.3494	26.4995	25.8322	25.4167	24.8511	24.2953	NA	26.2797	24.6627	26.4305	25.6502	25.4909	26.1168	25.3721	24.9374	25.0666	24.5072	25.1875	25.4235	25.7988	25.6778	25.039	24.9925	24.0791	24.9685	25.2537	25.3692	25.0991
O75781	28.373	27.6558	27.9403	27.8608	28.3794	27.6223	27.8072	28.6504	28.0455	28.3858	29.0137	28.5533	28.9147	28.5043	27.8683	28.7078	28.1578	27.0454	26.3716	26.1807	27.4663	27.4419	27.0271	27.6249	27.6437	27.5682	28.1982	27.803	28.5551	27.4	27.3778	27.7061	28.4075	28.0129	27.9031	27.9092	28.5011	27.845	27.883	28.6655	28.0177	26.0038	28.1928	27.1291	26.9933	28.1252	27.1822	27.92	25.9638
O75821;K7ER90;K7EL20;K7ENA8;K7EP16	25.0583	25.1699	25.3998	25.3046	25.2232	25.8205	25.2933	25.7061	25.0393	25.3442	25.1357	25.4736	24.7957	25.4159	25.3961	25.1747	24.923	25.3673	NA	25.2409	25.4955	NA	25.5156	25.0023	24.5467	24.7328	25.6337	24.9593	25.8031	26.1862	26.5375	24.9711	24.5135	24.8004	NA	NA	25.5013	24.9465	25.3401	24.8514	26.0082	25.6252	25.7911	25.2992	24.8515	25.506	24.2485	24.689	23.7102
O75822;H0YGJ7;H0YLP3	NA	NA	NA	NA	NA	NA	NA	NA	NA	NA	NA	NA	NA	NA	NA	NA	NA	NA	NA	NA	NA	NA	NA	NA	NA	NA	NA	NA	NA	NA	NA	NA	24.1253	NA	24.0842	24.2983	24.3634	24.4274	NA	NA	NA	NA	NA	NA	NA	NA	NA	NA	NA
O75828	27.4538	27.6073	27.6653	27.2018	26.9281	26.8748	27.2586	26.7867	27.0612	26.9183	27.2665	26.9785	26.8141	27.0387	26.8861	27.1203	27.1503	27.5085	27.256	27.5975	27.2736	27.4934	26.6638	27.3062	26.526	27.3382	27.755	27.6033	26.6391	26.8193	27.5853	27.3011	27.659	27.0823	26.9996	26.9424	27.0473	26.7961	26.5139	27.1215	26.8239	27.2083	27.1331	26.7759	26.6817	26.0357	27.4717	27.088	25.543
O75844	23.2539	22.8003	23.3678	23.1838	NA	23.5319	NA	NA	NA	NA	NA	NA	NA	NA	NA	NA	NA	NA	NA	NA	NA	NA	NA	NA	NA	NA	NA	NA	NA	NA	NA	NA	NA	NA	NA	NA	NA	NA	NA	NA	NA	NA	NA	NA	NA	NA	NA	NA	NA
O75874	31.2059	31.3502	31.2904	31.7133	31.9732	31.5466	31.178	31.4897	31.449	31.6124	31.9626	31.6477	32.0863	31.7479	31.8227	32.0545	32.115	31.1123	30.7348	30.48	31.507	31.3173	30.447	31.3786	31.481	31.9581	31.6815	30.7257	32.1952	30.7049	31.6815	31.2353	30.7476	31.0945	30.8586	31.4833	31.2246	31.4943	31.2861	31.6205	31.9533	31.4247	31.5798	31.1438	31.9126	32.0391	32.3326	31.621	31.6579
O75882	27.0777	27.7516	27.3344	27.2569	27.0425	27.307	25.8071	26.0525	26.6533	26.7865	27.0729	26.0971	27.4053	26.0846	25.595	26.7052	27.2599	25.4986	28.3757	28.2595	25.9013	26.7603	26.323	25.979	26.6571	27.4761	27.4897	27.7027	25.0196	26.0623	25.1804	26.9479	26.8723	27.8716	26.9148	27.7178	27.1959	27.8017	26.0594	26.1868	26.9307	27.5784	27.4239	26.9333	27.7958	27.4035	26.7475	27.4706	27.0708
O75891	30.6925	29.9599	31.1446	30.9048	31.6155	30.6298	31.3448	30.47	30.8974	31.4223	30.9374	30.4022	31.3735	31.9134	31.7173	31.353	31.5929	29.041	27.6252	28.1651	28.1995	28.6588	26.2014	28.7003	28.5768	31.2045	29.9124	25.9985	31.2347	27.658	30.4771	30.2263	31.0446	30.1079	31.0521	30.7415	31.6297	30.3879	31.1888	30.3332	31.1747	31.0069	30.8791	29.9238	31.5643	31.3239	31.0476	31.2623	31.3654
O75907;A0A0A0MR74	NA	NA	NA	NA	NA	NA	NA	NA	NA	NA	NA	NA	NA	NA	NA	NA	NA	NA	NA	NA	NA	NA	NA	NA	NA	NA	NA	NA	NA	NA	NA	NA	23.2117	23.2476	23.3197	23.4575	NA	23.2093	23.3393	23.4349	NA	NA	23.1071	NA	23.6255	NA	23.3336	NA	NA
O75915	29.4526	29.6148	29.2945	29.9596	29.7962	29.1672	29.4869	29.1516	29.1287	28.3082	29.7904	29.3076	29.7452	27.3478	28.6927	29.2938	29.0361	28.1054	28.2028	28.4686	28.4527	26.3288	28.1284	28.5644	28.4775	28.6866	28.3633	27.5668	28.3716	28.5447	29.4834	28.5191	27.5973	28.8348	28.8156	28.8605	29.3769	28.5606	28.564	28.0113	29.0845	29.9815	28.3591	28.6926	28.2985	28.6272	28.6192	28.6248	27.8217
O75923	25.8758	26.0218	26.1329	26.6775	26.1965	26.4717	26.7605	26.3009	26.0714	26.4068	26.3931	25.6951	26.0279	26.1113	26.4896	26.0682	NA	26.4473	25.8853	25.3802	26.5776	26.0521	26.7951	27.0121	26.3143	26.7161	25.8693	NA	27.4478	25.9721	26.622	NA	25.3949	26.071	25.5112	26.4836	24.6356	26.2037	25.9437	25.9439	26.0477	25.7681	24.6555	26.3813	26.0829	25.473	25.2914	25.7507	24.107
O75935;X6RA56;A0A0A0MRV8;X6RLR1;X6RCK5	26.9426	27.1509	27.0678	26.5869	26.6099	26.5056	27.3752	26.711	27.1758	26.8073	26.5803	26.6411	26.8048	26.9281	26.699	26.7421	26.6729	27.0476	26.2313	26.2413	26.9275	26.9233	26.5711	26.5273	26.8859	26.8146	27.1205	NA	26.4175	NA	26.4725	26.5567	27.292	27.3888	28.0209	NA	27.8638	27.6291	28.0168	28.2551	28.7819	NA	27.5227	26.0411	NA	NA	NA	NA	26.697
O75947	28.3505	27.9779	28.314	27.4378	28.2723	28.0799	28.5421	28.5754	29.0712	28.9062	28.9677	28.3859	29.0746	28.344	29.4052	28.8051	28.6663	28.6733	28.1687	28.1162	28.482	28.3375	28.4998	28.6055	29.2878	28.254	28.0303	26.1538	28.9213	28.4631	28.4872	26.935	29.0463	28.6765	28.5185	28.5529	28.2082	28.1511	27.8922	28.6157	29.4237	27.9209	28.2419	27.9849	28.0309	27.9331	28.5154	27.7097	27.4957
O75955;A0A140T9R1;A0A140T9W4;A0A140T9X0;A2AB09	27.2375	25.6048	27.2087	26.9451	26.3118	26.4183	27.1057	26.5874	27.0675	26.017	26.0257	26.0005	25.9398	26.1149	26.1366	26.3411	26.5335	25.9972	28.0643	28.2267	26.2416	27.1065	26.4178	26.3035	27.1157	27.0233	27.2763	27.1243	25.526	25.7488	27.2646	27.3748	27.0905	26.807	26.1625	26.7032	26.7199	26.5503	26.3629	26.7337	27.2447	25.9313	25.6174	25.847	26.696	25.8544	25.9745	26.0344	25.8885
O76003	24.9319	24.9137	25.1526	25.0413	25.8303	24.9975	26.2519	24.8919	24.6754	25.9439	26.2785	25.4395	25.9043	25.8513	25.0853	25.4374	25.5024	25.6149	26.9846	27.0112	25.6204	26.1333	26.036	26.1803	NA	25.9287	25.9164	25.6554	26.3778	26.0693	25.7377	25.6486	24.1703	NA	25.7125	25.4121	24.1951	24.4192	26.3306	24.4412	23.3815	24.9899	24.9847	25.6556	24.65	24.8303	24.5639	24.1206	24.251
O76024	26.209	25.9681	26.4195	26.2186	25.2088	26.8571	26.1874	25.3551	24.4737	24.7816	24.569	25.7403	25.3235	26.0969	25.0228	25.3376	25.2017	23.7634	NA	24.6289	24.9542	NA	23.8501	24.4173	24.1701	24.7848	24.6747	25.7454	24.7514	24.7214	25.5728	NA	25.4116	25.5681	25.6987	25.6406	25.7475	26.3537	26.2523	25.4342	25.516	24.4398	25.055	23.9294	24.3726	24.994	24.3907	NA	23.9858
O76062;E9PRQ1;E9PLS9;E9PLI3	24.6605	NA	NA	24.7093	24.1411	NA	NA	NA	24.654	25.3208	NA	25.4507	25	24.6997	25.6716	25.2577	25.1682	23.6437	NA	NA	24.6327	NA	NA	NA	NA	24.5513	25.402	NA	25.5145	24.5721	25.2725	25.4202	24.6353	NA	24.8316	NA	NA	NA	24.255	NA	NA	25.0786	24.9124	24.6884	25.0516	NA	24.746	25.1583	24.7996
O76070	31.141	30.6199	30.5898	30.4334	30.5858	29.9418	31.0553	30.7715	31.1718	29.9796	30.9404	30.639	30.1781	30.6375	30.2042	29.0232	30.3035	31.1906	29.6612	29.8874	30.0157	29.706	29.4508	30.1406	29.7506	30.0337	30.2972	30.6487	29.8571	29.6164	28.5324	30.8786	31.2387	30.4589	31.3872	30.7324	30.2284	29.8583	30.7436	30.8686	30.6218	29.2008	30.0568	29.1289	28.5551	30.3137	29.7909	27.3037	28.61
O94760;B4DYP1	NA	NA	23.6002	25.077	24.9963	25.4475	24.1431	NA	24.3287	24.8782	25.1202	25.1857	24.7754	25.0629	24.992	25.0831	24.8416	24.3012	24.0755	24.2474	24.4702	23.9613	22.4582	NA	23.4489	24.9781	25.3169	NA	24.4831	23.9733	25.0958	23.1502	24.6352	23.0134	NA	24.7006	NA	25.8686	21.9275	NA	24.5411	25.8975	25.0172	25.4505	24.8277	25.1116	25.918	25.1078	25.0463
O94788;H0YMG7	NA	24.8766	25.8283	24.7099	NA	25.2282	24.5373	25.6108	25.865	24.3519	24.9682	25.6567	24.363	24.5248	24.7853	NA	26.1453	NA	NA	NA	NA	NA	NA	NA	NA	NA	NA	NA	NA	NA	NA	NA	24.9888	24.4393	NA	23.7235	NA	24.522	NA	NA	25.8941	25.761	26.3376	27.9068	25.0511	24.2974	25.3777	26.818	27.9521
O94811	24.7633	25.0046	NA	NA	24.6935	NA	24.0775	24.7448	25.3549	25.9068	25.7677	24.8762	24.9459	24.4677	NA	25.4061	NA	NA	NA	NA	NA	NA	NA	NA	NA	NA	NA	NA	NA	NA	NA	NA	NA	NA	NA	NA	NA	NA	NA	NA	NA	NA	NA	NA	NA	NA	NA	NA	NA
O94826	25.7388	26.349	27.1786	26.4731	26.0084	26.3424	27.6378	26.7243	26.1989	26.1058	26.1731	26.7561	26.639	26.9863	27.6162	27.121	26.0971	27.204	26.1817	23.8003	27.0382	25.7931	26.3	25.965	25.9783	26.2888	26.0281	24.7719	26.8957	26.5562	26.3377	25.488	26.9835	25.9393	27.2942	26.7172	27.2312	26.1774	27.1042	27.4524	26.9363	26.3745	25.8396	25.8702	26.0746	25.8083	25.7524	25.9778	25.2923
O94830;H0YF30	NA	24.241	24.6543	24.0517	24.3068	25.2728	24.3776	24.3416	24.1716	24.5672	24.3812	23.8275	24.191	24.9783	24.0434	24.0731	24.6725	25.2678	24.8343	24.5282	24.766	24.0849	23.5555	24.3896	23.9255	25.3451	24.3704	25.3893	24.889	24.8829	24.1262	24.4486	24.4509	24.7901	23.9162	24.4434	24.9898	24.5154	24.8483	25.1477	24.3266	23.8274	24.4061	23.5081	24.2681	24.471	24.2669	23.8833	24.0926
O94832;J3QRN6;K7EIG7;J3KRL0	23.4958	24.6285	23.6837	21.2961	22.2508	NA	23.9495	24.3736	NA	22.4489	22.3428	23.4021	NA	22.5582	23.583	NA	NA	26.8637	25.5038	26.3515	26.0623	25.4175	25.1803	26.1102	25.5875	24.755	23.6153	NA	23.5577	24.4647	24.928	NA	23.8379	23.6723	22.5871	21.2013	NA	NA	22.7193	NA	22.7096	24.1983	23.5649	25.3647	23.7329	22.6297	24.1138	24.6003	23.09
O94855;E9PDM8;E9PC44	24.348	24.7907	NA	23.0095	23.3751	25.3407	24.4262	24.6585	24.2883	23.4622	23.6675	23.5442	23.8768	25.0055	24.8508	23.4197	23.5304	25.0889	25.0156	24.6359	23.3642	24.4812	25.6159	26.2836	NA	21.9326	24.2617	NA	21.7325	25.7248	25.4392	NA	24.6228	23.0442	23.0383	23.5473	23.3387	23.8053	23.14	23.4299	23.619	23.1227	24.3116	24.131	23.4642	23.0117	23.3353	22.5673	23.2797
O94874	24.3091	25.2857	24.2395	25.2274	24.4401	25.3801	25.0126	24.6767	24.9105	25.025	25.4209	25.073	24.9532	24.102	25.2583	25.1311	23.9841	25.517	24.7214	24.6198	25.3098	24.6559	26.0024	24.4182	24.675	25.3327	24.9992	25.4351	24.9389	25.0222	25.5894	24.6868	24.7467	24.9684	24.6675	24.6382	24.8961	24.5208	24.9522	25.0203	25.2642	24.5544	24.5115	24.9736	24.7028	24.0816	24.0613	24.7891	24.5458
O94875;H7BXR3	25.8518	24.9703	25.5393	25.047	25.6371	25.7176	23.0702	24.8168	25.8949	24.5798	24.732	25.2275	25.6905	25.6732	26.3012	26.5707	26.7858	24.0781	24.9003	NA	23.0583	25.5382	NA	24.7315	25.2833	25.6068	25.5428	27.007	23.2706	NA	26.3703	27.0457	25.4485	25.2311	23.6016	24.5878	NA	25.6788	NA	NA	25.3969	26.3497	24.2849	28.2231	25.7095	25.8069	26.2311	26.3292	27.1024
O94903;E5RG77	NA	NA	25.7445	24.3982	NA	24.0004	25.0426	23.895	NA	25.274	24.3511	25.2214	NA	23.7775	24.0741	23.8613	NA	24.4488	25.1378	24.8648	25.6728	NA	24.344	24.6244	25.9005	24.8015	NA	NA	26.0194	NA	NA	NA	NA	NA	25.2666	NA	NA	NA	25.4039	NA	NA	24.548	25.0843	24.2245	24.372	24.5901	24.2621	24.6146	NA
O94905;E5RHW4	28.5508	28.7246	28.531	28.6288	28.7134	28.7067	28.3675	28.364	28.3086	28.1991	28.4167	28.5072	28.5053	28.4875	28.4553	28.3282	28.4987	27.7239	27.8087	27.6625	27.9144	27.8418	27.5583	27.8848	27.9583	28.4518	28.1987	29.1258	28.1143	27.9744	28.5891	28.7526	28.5436	28.1585	28.077	28.344	28.5096	28.8975	28.2244	28.3322	28.3897	28.2619	28.3327	28.1439	28.5993	28.7392	28.5695	28.739	28.5724
O94925	23.1138	NA	23.4985	23.4199	NA	NA	23.2697	NA	23.1943	23.1492	23.4386	NA	NA	24.1777	23.8231	NA	NA	NA	NA	NA	NA	NA	NA	NA	NA	NA	NA	NA	NA	NA	NA	NA	24.6308	NA	22.3662	22.2909	23.7901	NA	25.3805	23.0783	24.1019	22.0415	NA	22.6546	NA	NA	NA	NA	NA
O94973;A0A0G2JS82;A0A0G2JQM1	28.9823	28.5885	29.0917	28.1673	28.448	28.1654	29.272	28.9427	28.6567	28.8653	28.8977	28.6356	28.2149	28.4986	29.2823	28.9994	28.3104	29.0943	28.6183	29.4172	28.7408	28.402	28.8589	28.8094	28.3015	28.2203	28.5588	27.4921	28.3846	28.2256	28.5425	28.1711	27.9557	27.8308	28.8507	28.1667	27.9048	27.6871	29.0563	28.5436	27.8671	27.9538	28.4139	28.2676	28.0042	28.2815	27.925	28.2262	28.0573
O95139;A0A087WZX2	NA	NA	NA	NA	NA	NA	NA	NA	NA	NA	NA	NA	NA	NA	NA	NA	NA	NA	NA	NA	NA	NA	NA	NA	NA	NA	NA	NA	NA	NA	NA	NA	25.9143	25.9561	NA	25.836	26.015	25.8855	NA	NA	NA	NA	NA	NA	NA	NA	NA	25.4266	NA
O95168;C9JXQ9;F2Z3P9	26.7573	27.7122	27.0062	26.6716	26.6108	26.2071	27.8342	27.6867	27.0376	27.3056	26.497	26.704	27.0615	27.2347	26.9949	27.3272	27.4319	26.6721	NA	NA	26.3857	25.309	26.0505	26.2247	26.0483	NA	25.8214	NA	28.8738	27.1604	27.5019	NA	27.0529	26.7947	27.1094	26.5416	26.698	26.5484	26.9545	27.4835	27.0903	27.8612	26.8759	26.0327	25.6135	27.3856	27.1501	28.1085	27.3325
O95169;K9J7I2;E9PQ68	NA	NA	NA	NA	NA	NA	NA	NA	NA	25.2003	24.7873	24.8252	25.7291	24.9066	25.3323	NA	25.0647	NA	NA	NA	NA	NA	NA	NA	NA	NA	NA	NA	NA	NA	NA	NA	NA	NA	NA	NA	NA	NA	NA	NA	NA	NA	NA	NA	NA	NA	NA	NA	NA
O95182;M0R0N0	25.2467	26.9515	26.3006	25.1883	25.6817	25.567	27.1741	27.0308	26.9622	25.9219	26.1582	27.4272	27.0343	26.6229	27.4975	27.1389	26.3808	26.1405	NA	NA	25.5583	24.9053	24.7377	24.5443	25.4965	25.7541	25.9453	NA	28.2933	26.7055	27.0435	25.1498	26.8482	25.43	25.198	26.0717	25.35	25.5285	25.7178	25.6035	26.579	27.2137	27.1364	26.245	25.7142	27.0742	27.7038	27.5693	26.8347
O95183	25.747	25.0862	25.473	25.3088	25.5488	25.4103	25.8381	24.5746	25.1512	NA	NA	26.2262	26.0081	25.2963	24.0112	25.3133	25.9774	NA	NA	NA	NA	NA	NA	NA	NA	NA	NA	NA	NA	NA	NA	NA	NA	NA	NA	NA	NA	NA	NA	NA	NA	NA	NA	NA	NA	NA	NA	NA	NA
O95197	29.5633	29.6951	29.6479	30.2307	29.6904	29.5742	29.6201	29.1197	29.4849	28.4947	29.6399	28.7066	29.5741	28.8713	29.0303	28.8469	29.2902	29.2112	28.3077	28.6283	28.8917	28.6146	27.5834	NA	28.7139	29.1844	29.2342	28.1453	28.8836	28.5838	29.3994	28.9252	29.4287	29.5	29.6774	29.1315	29.496	29.8094	28.6153	28.9007	29.2443	28.8384	28.3295	28.6132	28.8187	29.0409	29.3484	29.0766	28.7305
O95202	24.984	25.3546	25.454	24.9218	24.9504	24.2172	26.2745	25.8697	NA	26.6953	25.7571	26.1975	26.6972	26.0073	27.5239	26.544	25.5416	25.9243	24.4032	24.9345	26.2364	25.417	26.3814	25.5009	25.062	25.2817	25.0699	NA	26.1787	25.5494	25.2408	NA	25.0134	25.0475	26.1109	24.4028	25.1245	25.4248	26.2371	25.1621	25.5314	24.063	26.0252	21.9504	24.2574	23.8107	25.5149	25.347	23.516
O95292	27.1093	26.9451	27.0949	26.821	27.6045	27.1532	26.0001	26.8534	26.7807	26.4436	27.1378	27.0943	27.102	26.5153	27.4405	26.9908	25.8091	25.9845	26.1829	24.7478	26.6445	26.1693	26.1811	NA	27.6452	26.2154	26.6374	25.1572	27.1701	26.9101	26.4971	25.8639	27.2064	25.9802	26.097	25.9648	26.1706	26.1688	26.6191	26.5308	26.3455	26.4767	26.9059	25.389	25.2804	27.1967	26.8746	25.6468	26.8325
O95295	NA	24.0498	24.1138	24.4286	NA	23.7514	NA	23.6806	NA	NA	23.5791	NA	24.4952	NA	23.4883	23.739	NA	24.4426	NA	NA	24.3095	24.1299	24.5709	24.5864	NA	NA	NA	NA	24.0825	24.3116	NA	NA	24.7154	24.3737	23.7558	24.4824	NA	24.8494	NA	NA	NA	NA	23.7236	23.2985	NA	NA	NA	NA	NA
O95297	23.9887	NA	NA	NA	24.1459	NA	NA	23.6477	NA	NA	23.6165	23.9556	24.2467	23.7956	NA	23.8146	24.6344	NA	NA	NA	NA	NA	NA	NA	NA	NA	NA	NA	NA	NA	NA	NA	NA	NA	NA	NA	NA	NA	NA	NA	NA	NA	NA	NA	NA	NA	NA	NA	NA
O95298;E9PM14;A0A087WUM3;E9PQ53	26.0709	NA	24.4879	24.787	25.907	25.765	26.4005	25.2415	25.7907	25.3886	26.8377	26.4661	27.2761	25.6949	27.273	26.3151	26.1517	25.6948	NA	NA	25.2531	24.8226	24.7299	24.8821	NA	25.1606	25.2416	NA	27.3472	25.1035	25.6571	25.5875	26.9211	26.6296	27.0398	25.8971	26.6612	25.8599	26.7838	27.0965	26.3095	26.3715	26.5456	25.7433	25.5962	26.411	26.1115	26.4533	25.5356
O95302	NA	NA	24.3725	25.0772	25.0883	25.6774	25.0444	25.5184	NA	24.2777	24.1855	23.7154	NA	25.0387	24.6362	NA	NA	26.4763	25.1896	25.9155	26.607	26.3694	26.5113	25.882	25.6683	25.9917	NA	25.9829	25.4649	25.9248	27.0841	NA	25.1673	25.7661	NA	NA	24.9885	26.3608	25.5962	25.7656	25.7067	25.2529	25.2271	25.3454	24.7361	NA	25.7791	NA	25.5639
O95336;M0R261;M0R0U3	28.4851	27.8425	28.8474	28.6977	28.7285	28.7839	28.7516	28.7602	29.0115	27.6874	27.6111	27.8919	27.7264	28.7356	28.6195	28.1569	28.4323	28.8773	27.995	28.8326	28.6726	28.6669	28.8275	28.5468	28.9979	28.6624	28.8677	27.8135	28.6528	28.5495	28.5607	28.1473	28.1433	26.2145	28.1889	28.4003	NA	28.6941	28.4352	27.7576	NA	28.0128	28.4896	28.2514	28.083	28.4741	28.2273	27.9638	28.6294
O95340	24.4478	NA	23.2238	23.6854	23.489	NA	24.2118	23.5384	23.1887	22.6511	23.5059	21.8305	NA	24.7893	23.6242	NA	NA	24.2143	NA	NA	23.4367	23.4021	25.485	23.2799	23.5283	22.6993	NA	NA	23.9319	24.0129	NA	NA	23.6109	23.0006	24.3954	22.8781	23.862	NA	24.3983	23.7678	23.8201	22.9982	23.356	23.5939	NA	NA	23.5002	NA	24.2401
O95352	NA	NA	NA	NA	NA	NA	NA	NA	NA	NA	NA	NA	NA	NA	NA	NA	NA	NA	NA	NA	NA	NA	NA	NA	NA	NA	NA	NA	NA	NA	NA	NA	22.8606	22.7472	NA	NA	NA	NA	23.3168	22.5163	23.3236	NA	NA	NA	NA	NA	NA	23.2241	NA
O95372;Q5QPQ1;Q5QPQ0	NA	25.5813	25.6667	NA	25.3975	25.5619	NA	24.954	NA	NA	NA	NA	NA	NA	NA	NA	NA	26.1843	24.8515	24.907	24.0228	NA	24.604	NA	NA	NA	NA	NA	NA	NA	NA	NA	NA	NA	NA	NA	NA	NA	NA	NA	NA	NA	NA	NA	NA	NA	NA	NA	NA
O95373	24.2468	NA	23.9969	23.908	24.5163	NA	24.6083	24.5959	24.5133	24.7345	24.7854	24.6721	24.9415	24.9048	24.4354	25.0351	23.71	24.548	25.2085	24.9977	24.8594	24.418	25.0214	24.4046	23.6764	24.0035	23.7	NA	24.6209	24.652	NA	NA	25.1025	NA	24.7808	NA	NA	NA	23.4756	NA	NA	24.6363	24.3406	23.9516	24.1035	23.3508	22.4077	23.9025	NA
O95394;J3KN95;A0A087WT27	25.9085	24.9897	26.8286	25.7058	25.3795	25.67	26.8609	26.59	25.4503	26.5861	26.3863	25.5558	26.5275	26.5947	26.8532	26.7037	26.1344	26.5212	25.0184	25.1739	25.6594	25.5575	26.0643	26.1336	23.9016	25.1349	25.33	NA	27.1274	25.5825	24.3564	NA	24.6623	25.4483	26.3732	25.6609	25.6936	NA	26.7513	25.5869	25.7165	25.3911	24.7738	25.0016	25.0415	25.8248	24.8157	25.3841	25.378
O95433;G3V438;H0YJG7	NA	NA	NA	28.7314	NA	NA	28.92	28.4508	NA	29.5275	28.9784	29.4656	NA	29.3323	29.0293	29.3854	29.1394	NA	NA	NA	NA	NA	NA	NA	NA	NA	NA	NA	NA	NA	NA	NA	NA	NA	NA	29.0495	NA	28.816	29.5267	NA	NA	29.2087	28.9656	29.2553	29.3323	29.1172	29.3525	29.317	29.6532
O95445;Q5SRP5	NA	NA	NA	NA	NA	NA	NA	NA	NA	NA	NA	NA	NA	NA	NA	NA	NA	25.7935	28.1242	28.5357	26.2344	26.745	25.7856	26.7652	28.9973	28.3186	27.3444	NA	25.3948	NA	NA	27.105	26.2336	26.5389	26.0475	26.9286	NA	NA	NA	NA	27.9696	27.5957	27.2708	NA	27.923	26.5129	25.9273	26.323	26.2114
O95470;H0Y3V8;H7BXL7	NA	NA	23.9073	24.3614	NA	23.6171	23.7192	23.87	NA	NA	24.3595	NA	NA	NA	NA	NA	NA	NA	NA	NA	NA	NA	NA	NA	NA	NA	NA	NA	NA	NA	NA	NA	NA	NA	NA	NA	NA	NA	NA	NA	NA	NA	NA	NA	NA	NA	NA	NA	NA
O95486	24.0682	23.4033	23.5062	24.6309	23.6117	NA	24.8326	24.2719	NA	23.9737	23.8624	24.591	23.5807	24.6074	24.5985	23.2576	23.6807	24.233	NA	23.3654	23.8186	23.9033	25.5021	25.6802	22.2902	23.6292	23.8179	NA	24.1734	25.1279	21.8099	NA	NA	23.317	24.7815	22.4805	22.9618	22.7837	24.0324	24.3889	23.9359	22.6838	23.3687	23.6513	23.7159	23.9424	NA	NA	23.6195
O95487	22.3606	22.2927	22.2379	23.6253	NA	22.0019	23.8286	23.6195	NA	NA	NA	NA	NA	NA	NA	21.9993	NA	NA	NA	NA	NA	NA	NA	NA	NA	NA	NA	NA	NA	NA	NA	NA	NA	NA	NA	NA	NA	NA	NA	NA	NA	NA	NA	NA	NA	NA	NA	NA	NA
O95573	25.9434	25.4146	25.4977	25.6263	25.8767	25.5362	25.2611	26.2882	26.1413	25.8498	25.2167	25.5297	25.4847	24.8341	25.825	24.8904	24.5044	25.4074	24.4214	24.5512	26.0154	25.6322	25.4203	24.462	25.6192	25.4695	24.9184	NA	25.8308	24.8955	25.1521	26.0412	25.7182	25.4047	25.1601	NA	25.5452	25.3997	25.6867	25.886	25.8869	25.43	NA	24.594	25.3859	24.1288	24.5171	NA	24.1555
O95674	25.1086	24.6762	23.3114	24.7284	24.711	23.7014	NA	25.5101	25.0168	23.5651	24.0345	24.3574	NA	NA	23.5751	23.7472	NA	23.1553	22.5008	23.7455	23.055	NA	23.4573	NA	23.4129	23.7293	NA	NA	23.9224	24.2541	23.611	25.3808	24.4568	24.5872	24.1186	23.0463	24.3518	NA	NA	NA	NA	24.7398	24.2396	24.2263	NA	NA	23.8853	NA	24.6514
O95716	24.3918	24.465	24.7077	NA	NA	NA	24.4189	23.766	NA	23.9298	23.4712	24.203	24.1923	24.0291	23.8152	NA	24.2978	NA	NA	NA	NA	NA	NA	NA	NA	NA	NA	NA	NA	NA	NA	NA	NA	NA	NA	NA	NA	NA	NA	NA	NA	NA	NA	NA	NA	NA	NA	NA	NA
O95747;C9JIG9	24.811	25.8795	24.8094	25.5027	25.3223	24.7524	25.8408	25.1363	24.7782	24.4997	25.3106	25.5007	24.6215	25.0053	25.529	25.2829	25.1324	24.8779	25.7453	25.7559	24.9308	24.7323	25.3682	24.961	25.2876	24.7078	25.708	25.9161	25.3369	24.8212	24.5441	25.6504	25.3569	25.224	25.2422	24.9388	25.2978	24.2714	25.2441	25.3641	25.4284	23.8006	25.4656	24.6519	24.4896	24.7308	24.0741	24.3312	24.5416
O95777;F2Z2Y6;C9JIZ0;C9JNV3	NA	NA	NA	NA	NA	NA	25.3223	24.2126	NA	24.697	25.0609	23.9294	25.2583	NA	25.0446	25.3772	25.1695	NA	NA	NA	NA	NA	NA	NA	NA	NA	NA	NA	NA	NA	NA	NA	25.1178	25.4012	24.474	NA	NA	NA	NA	24.9298	NA	25.8263	25.3854	24.8792	NA	25.8648	25.8678	26.5464	25.3549
O95782	26.8105	26.5601	27.4841	26.0427	26.5689	26.5936	27.378	26.8391	26.4338	27.2376	27.3337	27.5041	26.8133	27.0456	27.5507	27.1621	26.6778	27.5106	26.9605	27.7762	27.05	26.8374	27.0408	26.835	26.5388	26.465	26.6854	26.4465	26.7676	26.6105	26.7217	26.7357	26.1367	26.0322	27.0849	25.365	25.1513	26.0491	26.6128	26.1106	25.9564	25.8708	26.3897	27.0073	26.3756	26.5227	26.6548	26.8666	26.6028
O95810	30.2213	29.9175	30.4766	30.6238	31.0295	30.1074	30.8885	31.4844	30.6887	31.5904	31.7651	31.1934	31.8552	30.8871	31.0086	31.3064	31.3424	29.6572	29.5165	29.1907	30.1087	30.8522	29.4648	30.2217	30.4842	30.8605	30.9846	29.8723	32.139	30.1014	30.0315	30.7874	31.4752	30.7036	30.6733	30.7689	30.8941	29.9748	31.3772	31.2305	31.407	30.6488	31.181	30.7577	31.0554	31.4456	30.9527	31.4542	30.7587
O95816	24.239	24.1311	24.3909	NA	24.7591	24.4769	24.3909	25.2592	25.112	24.4112	25.0131	23.9473	23.9453	NA	24.5897	24.8119	24.4569	NA	NA	NA	NA	NA	NA	NA	NA	NA	NA	NA	NA	NA	NA	NA	24.2477	24.0275	24.3652	24.3338	24.6426	NA	24.5824	NA	NA	NA	NA	NA	NA	NA	NA	NA	NA
O95817;C9JFK9	26.4585	25.8852	26.1414	25.316	26.2102	24.7118	26.2223	25.8068	NA	26.1089	26.6488	26.126	26.8647	26.7214	24.9701	24.9493	25.5636	24.6606	24.2391	NA	25.3917	25.5793	25.7376	25.2891	25.1728	25.3877	25.3805	NA	27.3385	25.2672	NA	25.1576	25.6712	25.1131	25.5896	25.8551	26.4096	24.3107	26.6825	25.7958	24.1814	NA	25.3447	NA	NA	25.9962	24.7465	25.5516	24.5771
O95822	NA	NA	27.8882	28.1058	27.6032	28.5095	28.2053	27.5836	27.9568	NA	NA	27.5946	NA	28.0037	28.0682	28.1064	28.3676	NA	NA	NA	NA	NA	NA	NA	NA	NA	NA	NA	NA	NA	NA	NA	29.014	28.6399	28.2754	28.447	NA	28.5283	NA	28.4899	NA	NA	28.9248	29.0261	27.9627	NA	28.8863	NA	NA
O95825;A6NND8;A6NHJ8;A6NMA8;C9JQD0;A0A0C4DG14;C9K0F7;C9JAL0	NA	NA	NA	23.3044	23.3945	NA	23.293	NA	22.9468	23.0987	NA	22.9837	23.0626	23.7071	NA	23.2199	NA	22.6084	NA	NA	23.0134	22.9721	22.7489	22.8626	NA	NA	23.6316	NA	23.0697	23.0094	NA	NA	23.1848	23.4641	NA	23.125	NA	23.2361	23.3423	23.2519	NA	22.5422	23.0285	22.7242	22.8356	23.1374	22.8219	23.1876	NA
O95831	28.3695	27.9461	28.2715	28.4229	28.6266	28.6535	28.2836	28.8163	27.3619	28.5722	28.1157	28.0246	28.4514	28.1747	28.824	28.3911	28.4169	28.1579	27.4059	27.5206	28.1586	28.1735	28.5127	28.1438	28.0999	28.4612	28.3849	28.0537	29.0078	28.3048	29.3972	27.9985	28.079	28.0383	27.9983	28.0453	28.8097	28.6112	28.2571	28.5715	28.9186	28.4283	28.065	28.3723	28.8209	28.4174	29.2595	28.7028	28.9156
O95834;K7EIK7;A0A0C4DGQ7;C9JRL6	26.5037	26.6629	26.6421	27.0652	26.345	26.4824	26.3207	25.8221	26.2979	24.6046	25.2836	25.357	25.1062	24.9217	24.1936	25.0346	NA	NA	NA	NA	NA	NA	NA	NA	NA	NA	NA	NA	NA	NA	NA	NA	25.2076	25.3905	25.3272	24.7404	25.8082	26.8129	25.1666	25.2515	26.4893	26.1778	25.8458	25.6333	25.0985	25.3695	25.7309	NA	25.6491
O95861;A6NF51;F8W1J0	26.3363	26.4313	26.8147	26.6308	26.4549	26.6389	26.4862	26.3149	26.5091	26.6963	26.4905	26.1122	26.5744	26.6648	26.4396	26.6762	26.6662	26.0679	26.35	25.9191	25.7386	26.4241	26.1638	26.1386	26.0691	26.3418	26.7832	25.5688	26.2521	25.8989	26.4621	26.3959	26.2434	26.0676	26.5581	26.5013	26.2391	27.0112	26.8495	26.634	25.975	26.6885	26.5087	26.8158	26.8735	27.0446	26.8944	26.7031	26.8123
O95865;A0A140T971;Q5SSV3;Q5SRR8;H0Y7N1	29.9438	29.8767	30.3561	30.1448	30.2273	30.0493	29.1066	30.3222	29.8007	29.6512	29.755	29.9209	29.4561	30.0497	30.0694	29.88	30.133	28.6456	29.4685	29.3631	29.8962	29.7314	29.4994	29.7236	29.8625	29.717	29.6591	29.5957	29.821	29.2527	29.449	28.8891	30.1865	29.6268	29.6722	29.8335	29.896	30.1283	29.5681	29.6337	29.2319	29.9825	29.8852	29.7305	29.6452	30.1507	29.4558	29.2986	30.0693
O95881	25.5292	26.0145	25.6696	25.3064	25.2604	25.5941	25.469	25.2806	25.9158	NA	25.74	25.907	26.0885	25.8689	25.7844	25.3564	25.8924	26.0846	25.2414	NA	25.9503	NA	25.8527	25.6993	NA	25.6466	25.6608	NA	25.5979	26.3719	25.5708	25.449	NA	NA	NA	NA	NA	NA	NA	NA	NA	NA	NA	NA	NA	NA	NA	NA	NA
O96000;H3BPJ9;H3BV16	26.5366	26.0254	25.8979	27.0587	26.8326	26.9714	26.7634	27.306	27.7815	26.6237	26.6309	26.8029	27.2622	26.996	27.1981	27.1663	26.9565	27.0023	26.2173	NA	26.7289	26.3274	26.8823	26.5363	26.3659	26.4411	26.4009	NA	26.9901	27.2399	27.2258	NA	26.2768	26.0338	26.8305	NA	NA	NA	27.6612	NA	28.5482	26.8732	26.8921	26.8314	27.1104	26.4299	26.7333	26.7421	27.0339
O96005	28.5372	NA	27.7539	28.0337	26.9871	27.5436	27.6335	27.2105	NA	26.3931	26.5596	26.346	27.0578	26.713	25.9109	26.6083	27.4445	26.6929	26.5708	26.6014	NA	26.4955	NA	26.3943	26.5549	NA	NA	27.1245	26.393	26.6283	25.7555	27.0788	NA	27.1529	NA	27.5064	NA	27.4143	NA	27.0987	27.4427	26.6513	NA	26.7892	26.9945	NA	26.8471	NA	NA
O96019	NA	24.3097	NA	25.2186	24.0801	NA	24.4386	NA	NA	23.6683	23.9388	24.0779	24.5306	24.2307	NA	23.7699	24.1515	NA	NA	NA	NA	NA	NA	NA	NA	NA	NA	NA	NA	NA	NA	NA	25.6286	NA	NA	NA	NA	NA	NA	25.3911	NA	25.0431	24.6211	25.1611	24.9826	25.2338	24.9721	25.1559	25.4466
P00167	29.6622	28.3993	29.04	29.1603	29.8161	29.3189	28.9904	29.8314	30.4444	30.3072	30.809	29.9273	30.4678	29.5215	30.4339	30.1977	30.1549	30.517	29.0228	29.5626	30.5037	29.05	29.1611	30.7242	30.952	30.0072	30.3651	29.9731	31.5582	30.1291	30.5669	30.4204	30.0669	28.6469	30.4681	29.9878	26.8641	28.7179	23.9875	24.8613	25.9229	30.1663	29.6855	29.0238	30.4799	30.1698	30.6036	28.1839	30.3051
P00325;V9HW50;D6RHZ6	34.6087	33.4345	34.4157	33.8412	34.5837	33.4414	33.0658	34.0728	34.6163	34.5774	35.1076	34.1486	34.2193	34.412	35.6498	35.3614	35.0621	34.571	32.999	34.3813	34.2466	33.5415	33.3084	34.3756	34.8298	34.5003	34.6026	34.2456	33.998	33.4739	35.1071	34.2494	35.1419	33.6921	34.1707	33.6774	34.8284	33.7355	33.4046	34.3641	34.3071	34.8015	35.2843	34.685	34.8272	35.4548	36.0241	35.7362	34.7982
P00326;A0A087WU81	26.1408	27.4427	25.9696	26.5871	26.8424	27.6152	26.1317	25.9231	26.4514	26.2505	NA	26.941	26.0856	27.2785	26.8698	26.224	27.1134	NA	NA	NA	NA	NA	NA	NA	NA	NA	NA	NA	NA	NA	NA	NA	26.1723	26.9688	25.7318	26.4158	25.3865	26.8573	26.4154	26.0025	24.9553	26.5808	26.1218	26.7055	26.6513	27.7091	27.4474	26.2565	26.7436
P00338	32.8846	32.7053	33.0981	32.8266	33.2949	32.6544	33.2033	32.9187	32.8839	33.2813	33.361	33.1868	33.359	33.5238	32.7663	33.0824	33.287	32.9049	32.3467	32.4056	32.6896	32.8615	32.4439	32.7134	32.8921	33.2366	33.1851	32.5793	33.233	32.6044	32.7139	32.5703	32.6376	32.9475	32.7926	32.7793	32.9071	32.8569	33.1175	32.8615	32.396	32.7911	32.6899	32.8273	33.2334	33.442	32.8709	32.8286	32.5938
P00352	31.8952	31.7219	32.4948	31.7938	33.2527	32.6885	32.0982	32.4719	32.6688	32.0948	32.2801	32.1251	32.0135	32.7814	32.0374	32.3098	32.3	30.259	32.1507	32.407	31.4322	31.8764	31.1603	31.8712	31.8306	32.1347	31.7564	32.3495	31.9524	30.4858	32.0606	31.7592	31.9053	32.6416	32.3377	31.573	32.4155	32.3365	31.5941	32.3618	30.8029	33.2243	32.5706	33.1408	33.0005	33.1374	32.8477	33.2575	33.1803
P00367;P49448	29.4636	30.0146	29.4287	29.6244	29.9724	29.9639	29.6003	29.3711	29.6218	29.3954	29.2534	29.5311	29.0243	29.7634	29.6713	29.6547	29.7536	30.0033	30.1921	30.2815	30.3528	30.1072	30.2527	30.4398	30.4726	29.4802	29.3782	30.2417	29.6298	29.8939	30.2936	29.8645	29.5511	29.7604	29.5852	29.7711	29.1684	29.5645	29.4649	29.3556	29.3321	29.6452	29.706	29.7356	29.675	29.3288	30.0169	30.0588	30.4747
P00387;B1AHF3	31.2154	30.8911	31.1485	31.7056	31.4449	31.5875	31.4589	31.5003	31.3448	31.1614	30.2628	31.5138	30.8885	31.2944	31.0101	30.2292	30.6728	31.0676	31.1971	31.0178	31.8402	31.1415	31.1218	31.7832	31.0436	32.0633	31.8958	31.1476	31.8115	31.9817	31.5502	31.1462	31.4638	31.4764	31.3937	31.5505	30.8608	31.6088	31.634	31.2417	30.3788	31.4057	31.4668	31.135	31.2035	31.8941	31.3923	30.7709	30.9358
P00390	27.8681	28.4359	27.8792	28.0706	28.1096	28.3797	27.832	27.6621	28.2412	27.5626	26.5046	27.5024	27.1534	28.1799	27.3443	27.4137	27.8267	27.1114	28.5175	28.6358	27.594	27.9469	27.551	27.5992	27.6066	27.3352	28.089	29.2939	27.1677	27.7306	28.0622	28.5647	27.0979	28.0481	27.0274	28.0073	26.9178	27.6971	27.7621	26.4238	27.8155	27.857	27.706	28.3616	27.9798	27.8919	28.2321	28.2751	28.0836
P00403	28.3798	28.9607	28.3118	28.9087	28.5717	28.8231	29.3013	28.9194	29.242	29.3406	29.0076	28.6822	29.5498	29.2475	29.5856	29.2565	29.1066	28.9848	28.6375	28.3884	28.7443	28.9204	28.9075	29.2129	29.1902	28.5001	28.7554	27.6593	29.0186	28.6422	28.8543	28.5617	30.0182	29.7687	29.9019	29.7053	28.4486	29.976	29.7208	29.9863	30.0321	28.7326	28.438	28.5002	29.3563	28.787	28.9665	27.8962	29.0895
P00441;H7BYH4	30.5234	30.1856	30.3265	30.2247	30.0483	30.1717	29.9282	29.4108	30.1922	30.3303	30.4648	30.6098	30.4092	30.4254	30.5617	30.3331	30.9493	29.9721	30.76	31.1781	29.9446	30.5714	29.6791	30.1261	30.7995	30.5584	30.8127	31.9069	30.228	30.0461	30.6749	31.9163	30.7284	30.8027	30.8854	30.9856	30.256	30.2772	29.9245	30.6284	30.2049	30.4863	30.2331	29.9842	29.8153	30.5356	30.4947	29.0469	30.4577
P00488	31.9709	32.5321	31.6369	32.0667	31.184	30.7907	32.2574	31.5897	31.4681	30.7856	31.4639	31.1174	31.1458	30.5509	31.5161	30.7831	30.3807	30.5309	31.0268	30.0531	30.6028	30.4777	30.4721	30.9468	29.799	30.1483	30.9646	31.159	30.932	29.2279	31.4757	30.3188	29.9768	31.4279	31.2769	31.0582	31.0092	30.8762	31.433	30.5918	31.0441	29.9493	30.817	30.0938	30.3502	31.0425	29.9551	29.509	28.7727
P00491;G3V5M2	27.6911	26.6953	26.95	27.542	26.6114	27.814	26.8212	27.0674	28.3008	27.9312	27.4825	27.2408	28.1136	27.3957	25.8342	27.0425	27.6664	27.7765	30.6563	31.1846	27.9525	28.2856	28.032	27.0534	29.8933	28.985	29.1173	29.2049	26.4713	27.2167	27.6966	29.2605	27.445	28.7181	26.1727	27.7272	26.8979	27.7325	27.004	26.8653	25.3748	25.869	24.4558	26.7305	27.712	26.5228	27.4486	26.5157	26.4223
P00492	27.0231	26.4609	25.7647	26.4991	26.3401	26.8522	26.6165	25.7751	27.1589	26.3996	26.1309	26.1837	26.6521	26.7061	25.861	26.5808	27.4263	26.6531	29.2917	29.0824	26.6124	27.1381	26.5696	25.2365	27.2828	27.6758	27.4321	27.9875	25.3632	26.6003	26.3811	27.8814	25.0968	NA	NA	23.5977	NA	NA	NA	NA	25.7196	25.844	26.1397	26.031	26.9098	26.1695	26.5009	26.3905	25.7621
P00505	27.4413	27.9092	27.4816	27.7736	27.5966	28.0534	27.4335	27.5135	27.98	27.304	27.0421	27.1488	26.818	27.6697	27.8495	27.5258	27.0903	27.4578	27.7036	27.8471	27.6363	27.998	27.9118	28.0223	28.4942	27.7261	27.5698	28.9444	27.0657	28.1245	28.4786	27.5425	27.6757	27.7847	27.2108	27.6478	27.1372	27.9622	27.541	27.6325	27.2148	28.0989	27.6354	28.4444	27.2798	27.7906	28.5267	27.9776	28.0441
P00533;Q504U8;E9PFD7;A0A1W2PRR9	26.0916	26.2331	26.2147	26.085	26.5532	26.8838	26.207	26.7688	26.447	26.9322	26.6928	26.2524	26.6729	26.5574	26.9335	26.6956	26.6102	26.81	26.023	25.8608	27.0772	26.6121	26.2536	26.6967	25.8188	26.7971	26.6653	NA	26.9221	26.0407	26.9497	26.3164	25.4478	26.3758	26.406	27.0269	26.2155	26.6166	26.2841	26.7635	26.1243	26.8616	27.1764	26.7764	26.9676	26.1807	26.7255	26.577	26.7502
P00558	32.1851	32.3342	32.1987	32.3081	32.591	32.5343	32.2324	32.0271	32.39	32.2995	32.3789	32.2322	32.2701	32.6902	32.0019	32.4187	32.5802	32.1607	32.5223	32.4267	32.1438	32.2931	31.9723	32.2974	32.3644	32.3448	32.4764	32.2282	32.072	32.1771	31.9963	32.301	32.2498	31.8201	31.9535	32.3385	31.9975	32.5288	32.3254	32.1073	31.7598	32.4344	32.3361	32.6634	32.5576	32.4875	32.3031	32.3331	32.5178
P00734;E9PIT3	30.5624	31.1795	30.3668	30.4109	30.3936	30.1719	29.2365	29.7088	29.6424	30.8341	31.556	30.2571	30.1115	30.5154	30.8366	30.8496	31.0586	29.4451	31.3115	31.0652	29.6799	29.3577	29.1598	29.5943	30.9322	29.9037	30.2224	30.7907	29.2854	29.2949	28.159	30.8096	29.2091	30.1706	29.8552	29.9579	30.6793	29.7732	29.5085	29.6083	29.0529	30.3078	31.6782	30.1064	30.3688	30.5532	30.2226	31.3153	30.9259
P00738;J3QR68;H0Y300;A0A0C4DGL8;J3QLC9;A0A087WU08	34.7467	34.3771	33.4081	34.0647	33.7292	33.3395	32.7552	33.6052	34.2686	33.1652	34.1244	32.8128	34.9918	33.4333	33.1823	31.8049	35.4894	33.2637	35.4293	35.3594	32.3466	33.5367	33.3509	33.8366	35.3249	34.097	34.7047	35.6454	32.4399	32.1024	32.3311	36.2953	34.8694	34.2753	33.1981	33.8425	33.2449	32.9724	32.9597	33.8801	33.8455	33.2429	34.6044	33.1938	35.2772	33.73	33.7078	31.5907	34.5458
P00739;A0A0A0MRD9	27.2069	26.5785	26.6122	27.5112	24.2446	25.6909	25.4769	26.4003	26.7547	26.7085	27.8196	26.1858	27.8144	25.9437	24.3989	27.2199	28.0243	24.9082	28.3684	28.6444	25.1105	25.3981	26.5514	26.9172	28.4314	27.2323	28.2333	29.5018	24.4373	25.5635	24.1764	28.942	26.1655	26.5732	25.4912	27.1883	NA	25.2787	25.9029	26.7963	26.7846	27.5946	28.3067	27.6302	28.6327	27.4917	25.0496	28.1874	27.4043
P00747	30.5206	31.3613	30.4243	30.8588	30.2492	30.3015	28.8803	29.9287	29.8212	30.8084	31.399	29.8682	30.0188	30.3699	30.7095	31.2374	31.6191	29.4356	32.2587	32.4148	29.8531	30.6996	29.6262	29.8511	30.8769	31.5775	31.6746	31.1612	28.9846	28.9874	29.6502	31.5031	30.2522	30.829	30.1535	31.0253	30.5948	30.7396	29.207	29.7823	30.3699	30.6755	31.4956	30.5159	31.3526	30.3211	30.7165	31.5543	31.0243
P00748	27.0223	28.7022	25.6326	27.5748	27.6754	27.3893	26.3434	27.1649	27.3135	27.9676	28.5304	26.8007	26.8323	27.1654	27.1326	27.9336	28.171	25.6802	28.9204	27.5936	26.6347	27.9919	26.8152	27.7266	28.8303	27.7886	28.7729	28.4294	25.7483	25.4832	26.6944	28.6957	25.8057	28.002	25.0778	26.9924	26.7319	26.4827	24.9693	26.1362	26.6913	27.9965	28.6847	27.8787	27.3082	27.2749	28.1259	28.8687	28.1494
P00813;F5GWI4;F5GXW0	24.5195	26.3575	23.2904	25.3289	25.5186	25.086	26.461	25.6313	25.1512	25.3642	26.4997	26.1656	25.5414	25.9635	25.3397	25.7215	NA	25.8297	27.057	25.5902	25.3648	NA	25.9854	23.5076	22.8925	24.9111	25.7628	26.2507	25.8525	24.4872	26.6865	25.8373	25.0756	26.108	24.9119	25.4133	24.747	25.3001	24.8451	23.6114	24.0885	23.9247	25.3318	25.7077	24.6858	25.5926	25.8052	25.076	24.2485
P00915;E5RHP7;E5RH81;E5RFE7;E5RIF9;E5RG43	34.0208	33.3893	32.7585	33.7177	33.5518	34.065	32.5283	32.8274	34.0685	33.9558	33.5472	33.2214	33.7306	33.8858	32.4009	34.0216	34.324	32.641	36.9496	36.8035	33.5354	35.1396	34.2773	33.1093	36.0964	35.5502	35.9285	36.41	31.6176	33.3036	34.2954	36.3241	33.6135	34.4774	32.5606	33.6383	32.6576	33.8451	32.7575	32.0198	33.7941	34.345	33.4528	33.6305	35.1634	33.8301	34.1224	30.8658	33.3357
P00918	30.8865	31.2603	30.0284	31.1801	30.8948	31.5169	29.913	30.5481	32.3403	30.9002	30.5239	30.1532	30.8327	31.2915	30.196	31.1143	31.9503	30.6252	34.7156	34.4105	30.9884	32.7391	31.7917	31.1642	34.324	33.142	33.6314	33.3517	29.0829	30.5807	31.9991	33.9274	31.024	31.9809	30.0448	31.3121	30.1782	30.9393	30.1361	29.259	30.0902	30.9795	30.1374	31.2145	32.7574	30.9963	31.1843	30.6859	30.8468
P00966	29.8434	30.0931	30.161	29.3223	29.6213	29.1861	30.0296	29.6958	29.8189	29.9964	30.0111	28.8884	29.6169	29.4099	30.2567	30.0904	30.1171	30.5657	29.6363	30.0175	30.1337	30.4605	29.433	29.8	30.3279	30.6499	30.3068	29.3265	30.1931	29.5806	29.8765	30.097	29.5373	29.2603	29.6827	29.0735	29.2641	28.8742	29.8485	29.3782	30.0304	29.0842	29.3318	28.3951	29.0712	29.3482	29.7789	29.3134	28.6399
P01008	30.8611	30.4783	30.179	30.5258	31.592	30.8738	29.5668	30.6413	30.6057	31.3727	31.6686	30.8086	31.7273	30.9691	31.3151	31.5796	31.8055	30.2019	31.7686	31.4688	30.3505	31.1671	30.251	30.9418	32.0112	31.6818	32.2069	32.155	30.2544	30.3251	30.8353	32.1481	30.8703	31.7498	30.9346	31.3863	31.3897	31.1962	30.0032	30.7324	31.1067	31.7807	32.32	31.7869	32.1005	31.6304	31.9756	32.1394	32.192
P01009	35.0569	34.7427	35.1472	35.0873	34.722	33.7865	33.5529	34.639	34.6336	35.1198	35.5314	35.0197	35.8129	33.9824	34.7129	35.5321	35.6537	34.4489	35.7164	35.411	33.9863	34.3427	34.3209	34.0356	35.4409	35.0034	35.8669	35.5682	34.3922	33.2132	33.4176	36.1392	35.3988	35.5134	34.9571	34.8824	34.956	33.3764	34.3932	34.4607	34.1986	34.9107	35.8837	34.5432	35.5532	35.2539	35.3295	36.0206	35.3649
P01011;G3V595	32.683	32.3422	31.8126	32.358	32.1346	31.8512	30.9832	32.1413	31.6431	31.6864	32.2393	31.2726	32.4068	31.0528	31.9163	31.7945	32.51	31.2563	32.8662	32.6374	31.2947	31.6447	31.3288	31.4453	32.7698	32.266	32.736	32.7072	31.065	30.4271	31.2892	32.9334	31.896	32.2258	31.5766	32.1332	32.2567	31.8841	31.032	31.7654	32.1946	32.3171	32.9681	32.2313	32.891	32.0047	32.3268	32.5294	32.8281
P01019	28.7612	29.2711	28.0933	28.6205	28.9073	28.0796	27.0787	28.3315	28.4428	29.0538	29.0259	28.1294	29.0023	28.3842	28.6135	31.1064	30.7181	28.0395	30.1698	29.3692	28.5147	29.2821	28.4352	28.545	30.3628	29.3118	29.3782	29.4218	27.2659	27.6328	27.4969	30.9625	27.6731	30.2719	28.9085	29.5971	28.9579	29.4246	27.8041	28.9134	29.5346	29.7397	29.5776	29.0997	29.8718	28.4754	29.0419	31.6015	30.7133
P01023	35.3032	35.1801	34.6769	34.8053	34.6293	34.7655	33.7048	33.4225	34.1385	33.9651	34.7675	33.2889	34.4604	32.915	33.2966	34.9599	34.7213	33.5092	36.2515	35.9867	32.8402	34.4026	34.0042	33.3964	34.6194	34.594	35.4194	34.7254	32.1906	32.4955	32.4226	35.2621	34.3998	34.6038	34.3668	34.6876	34.4489	34.2578	33.2687	33.1314	33.8161	34.3776	35.0521	34.0047	35.0518	33.715	33.9997	35.2844	34.4261
P01024	35.2814	35.8951	34.621	35.3811	34.5638	34.8603	33.7414	34.3995	34.5273	33.9481	34.3545	33.3184	34.7646	33.5203	33.751	34.2834	34.8074	32.7698	35.4399	35.5589	32.8266	33.6552	33.2931	33.1406	34.3802	35.003	34.9671	34.8656	32.4398	32.8024	33.2583	35.6942	34.2291	34.8613	33.9789	34.872	34.3741	34.4855	32.7817	33.9231	34.0192	34.6589	34.4361	34.2936	35.2541	34.253	34.4867	34.8987	35.1639
P01031	30.1328	30.2769	29.1312	30.2515	28.8577	29.2593	27.9451	28.3949	29.269	27.7466	29.0727	27.07	29.1272	25.185	27.2024	27.9646	29.2872	26.3447	29.7741	30.1797	25.3573	25.4863	26.1555	23.9768	28.6335	30.0222	30.1591	28.7557	24.017	26.4574	28.0001	30.2081	28.9601	29.7211	27.4496	28.968	28.8095	29.167	26.5835	27.8933	29.1055	29.5466	28.255	28.8771	29.6459	28.2602	29.118	29.1759	29.3137
P01034	26.2911	26.4148	25.7441	26.6378	25.0445	25.8863	27.1915	27.0826	26.8627	25.3334	27.2032	27.2874	26.7755	26.2055	28.1665	27.174	27.219	27.4824	27.1183	NA	27.4596	NA	27.1265	27.7177	26.6262	27.1662	NA	26.7219	27.1329	26.4202	27.6935	27.2805	26.8641	27.523	27.2302	26.9439	27.0356	26.5238	27.1372	27.7282	27.4777	26.8723	26.67	26.3376	24.7069	26.1273	27.1739	26.902	26.5255
P01040;C9J0E4	27.1146	27.0336	27.848	26.6842	27.6018	26.6302	27.6339	26.4144	26.1196	24.4694	26.7065	27.3172	26.9688	27.6068	26.6271	25.5938	27.2107	27.6733	25.3756	NA	27.7546	27.146	27.5639	27.3943	25.7731	27.4638	25.6175	NA	29.0216	27.5983	26.5317	27.6095	NA	NA	27.062	25.6539	NA	NA	28.1803	28.1168	NA	26.4358	26.3655	26.5778	27.304	26.9865	NA	25.0456	27.3029
P01042	31.1268	31.8647	30.925	31.8549	30.6966	31.1128	29.7538	30.6448	30.2995	30.9241	31.3289	30.199	31.2499	30.3552	30.6701	31.864	31.8614	29.6219	32.5131	32.1615	30.6711	31.2238	30.4203	30.4581	31.7927	31.3302	31.7896	31.5699	29.6903	29.5052	30.5746	32.1965	30.8324	32.1779	30.7714	31.7568	31.5989	31.2895	29.8768	30.8892	31.6199	31.0237	31.8195	31.1949	31.441	30.9831	31.3	32.4527	32.0194
P01111	23.5825	NA	24.0848	NA	23.3309	NA	24.4896	NA	NA	23.6511	24.1169	24.3582	NA	NA	23.6986	23.6755	NA	NA	NA	NA	NA	NA	NA	NA	NA	NA	NA	NA	NA	NA	NA	NA	NA	NA	NA	NA	NA	NA	NA	NA	NA	NA	NA	NA	NA	NA	NA	NA	NA
P01112	25.6661	26.3722	25.9147	25.3257	26.2168	26.2875	26.1538	25.8163	25.943	26.7055	26.8031	26.7881	26.8002	26.4685	26.4412	25.9666	26.3066	26.6235	26.2939	26.0477	26.3582	25.7453	25.4189	25.6804	26.0233	25.8769	26.242	26.1618	26.587	26.2401	24.6325	26.0935	27.3783	27.4113	26.9232	26.2581	NA	25.3549	26.0088	26.5788	25.7892	25.6809	26.2303	25.8073	25.9538	25.7531	26.2272	NA	25.4056
P01591;D6RD17;D6RHJ6	28.8331	28.3798	27.8402	28.3873	27.4411	27.8932	26.9407	26.9508	27.3313	27.8418	28.5058	28.1043	29.2541	27.3258	26.5684	28.5057	28.9229	27.7053	29.9456	28.8344	26.7079	28.2094	26.8407	27.4442	28.5257	28.4469	28.925	29.2168	26.9824	26.0355	25.5639	28.7819	28.84	28.5242	27.6614	28.1533	26.4524	27.4427	NA	26.1709	28.1264	27.8745	28.5014	27.5506	28.5576	27.7693	26.467	27.4076	27.7646
P01599	27.5143	28.0327	27.3999	27.6958	25.3978	27.4226	26.5805	25.8666	27.5229	26.4859	26.5318	27.9689	27.2244	26.279	25.2809	27.2578	27.5813	26.7311	28.8133	27.7594	26.5958	26.9269	25.7566	26.6477	27.288	26.5336	27.3109	29.8108	25.3798	24.3091	NA	28.3023	NA	26.7061	26.4029	26.7941	25.2987	26.4673	NA	26.2522	NA	25.9918	26.3061	25.9139	27.2826	27.0051	24.3282	26.771	27.0862
P01602	27.5098	28.8804	27.6057	27.1762	27.7549	27.7988	27.1768	27.607	28.3276	27.8762	28.6755	27.7196	27.5622	27.4518	26.3712	28.8257	NA	29.3774	27.2179	29.792	27.3988	NA	27.536	NA	27.4644	28.5076	NA	30.7081	26.8859	27.5291	NA	NA	NA	NA	NA	NA	NA	NA	NA	NA	NA	27.1582	27.4045	28.4677	28.8678	25.9093	26.1493	NA	28.0162
P01619	31.0747	31.2282	30.9849	30.9085	30.0097	30.4905	29.655	30.464	30.4925	30.541	30.8966	30.7272	30.324	29.7378	28.915	30.551	30.8422	30.5239	32.5875	32.0134	30.2643	30.833	30.7965	30.2037	30.7757	30.9063	30.7612	31.8603	29.1097	28.8561	28.7212	31.7353	29.9762	31.0963	30.576	30.4675	29.331	29.0761	28.712	27.626	28.1476	30.6347	31.2181	29.8561	31.0784	29.1845	28.3675	29.4494	31.2797
P01700	29.57	28.7636	28.6467	28.1032	27.0998	26.6128	26.6684	26.6548	27.8495	27.3117	27.8309	28.6976	28.5767	27.7933	26.5967	27.722	28.532	29.2474	29.8668	29.5364	27.2101	26.5074	27.1304	27.2055	NA	27.9865	28.8862	29.9715	27.1913	26.9944	NA	28.955	28.0696	28.0676	27.9045	27.2644	NA	NA	25.931	NA	26.2627	27.7954	28.442	28.8553	28.7353	28.4079	26.3815	27.9121	27.9971
P01701	28.235	28.434	27.9149	28.1218	26.4365	27.2428	25.9286	NA	27.453	25.7313	27.5942	28.2243	28.1187	27.2877	25.6085	27.2271	28.4983	27.2107	29.426	28.3729	26.8442	NA	24.6939	NA	27.2078	NA	27.1761	29.306	26.543	25.2417	NA	28.6812	26.4511	27.3498	26.5107	26.1746	25.5554	26.1111	25.3958	NA	NA	NA	27.6191	26.7007	28.5236	26.1973	24.4419	24.0975	27.3719
P01704	25.6759	25.6407	25.7051	25.7997	26.3717	26.7665	24.8983	25.2076	NA	24.9792	NA	NA	NA	NA	NA	NA	26.054	NA	NA	NA	NA	NA	NA	NA	NA	NA	NA	NA	NA	NA	NA	NA	NA	NA	NA	NA	NA	NA	NA	NA	NA	NA	NA	NA	NA	NA	NA	NA	NA
P01706	28.7526	29.0788	28.9097	28.1441	NA	NA	26.7565	27.0105	NA	NA	28.7645	28.3317	29.1928	24.9928	27.0015	28.292	NA	NA	NA	NA	NA	NA	NA	NA	NA	NA	NA	NA	NA	NA	NA	NA	NA	NA	NA	NA	NA	NA	NA	NA	NA	NA	NA	NA	NA	NA	NA	NA	NA
P01714	28.0105	27.4459	27.7899	NA	NA	26.7813	NA	26.4221	NA	26.1205	26.3037	26.0183	27.8669	26.7104	26.0564	25.7524	27.5051	NA	28.2528	28.5514	26.2893	NA	NA	NA	27.4632	26.884	27.4666	28.2587	26.9562	24.5237	NA	27.0905	26.8513	27.0901	NA	26.1323	26.5876	24.9581	26.0169	NA	NA	26.8342	27.9266	NA	28.2782	27.4667	26.4671	26.5624	NA
P01717	27.2305	27.2187	27.6391	26.2982	25.5589	25.8579	25.6666	25.9396	NA	24.8424	26.8567	26.5488	27.1875	26.9586	NA	26.8153	28.2014	25.3571	27.5019	27.4346	25.3739	26.369	NA	25.4444	NA	26.1928	27.4445	28.5751	26.1613	25.8144	NA	28.2065	25.3938	NA	NA	NA	NA	NA	24.32	NA	24.2121	NA	25.4168	27.2707	27.9104	27.9238	NA	25.5871	26.6891
P01742;A0A0B4J2H0	28.8114	28.9475	29.1218	26.9027	27.5143	NA	25.7582	26.5635	NA	25.6088	25.993	27.4399	28.2529	27.6044	NA	NA	29.3626	NA	NA	NA	NA	NA	NA	NA	NA	NA	NA	NA	NA	NA	NA	NA	NA	NA	NA	NA	NA	NA	NA	NA	NA	NA	NA	NA	NA	NA	NA	NA	NA
P01780;A0A0B4J1V1;P01763;P01762	28.5395	29.8903	29.0494	28.9985	28.3607	29.2525	27.7106	27.8911	28.4418	27.2724	28.3994	29.2813	29.1919	27.8513	25.2288	28.5485	28.5866	27.1964	30.269	29.6866	27.7018	28.2391	27.6062	28.0719	28.2639	28.0969	29.2522	30.7141	27.6156	26.6712	25.3316	29.9649	27.0496	29.3541	27.2026	28.1714	27.8488	28.2845	26.7513	28.0439	28.2175	27.6147	28.7717	29.1896	29.7072	28.2371	26.6806	28.7645	29.0545
P01833	NA	21.5602	NA	NA	NA	NA	NA	NA	NA	NA	21.656	NA	NA	20.5873	19.7207	21.2045	21.9572	NA	NA	NA	NA	NA	NA	NA	NA	NA	NA	NA	NA	NA	NA	NA	NA	NA	NA	NA	NA	NA	NA	NA	NA	NA	NA	NA	NA	NA	NA	NA	NA
P01834	34.1868	33.4418	33.8954	33.4457	33.4656	33.3631	32.9068	33.4788	32.9992	33.4676	33.5538	34.1387	33.3296	33.113	31.9412	34.1032	34.1447	33.7725	35.2744	35.6821	33.1462	33.7915	34.0423	33.8311	33.4871	33.8771	33.3785	36.0934	32.7833	32.4191	30.792	35.2509	32.8878	33.2045	33.405	32.8169	32.2176	32.6147	32.3419	31.7186	30.3492	33.4192	33.4995	34.6959	34.3389	33.3254	31.7317	33.1257	34.357
P01857;A0A0A0MS08;A0A0A0MS07	36.4777	35.2533	36.1058	35.6407	35.6275	35.5909	35.2157	35.2109	35.0004	35.4624	35.8097	36.2826	35.394	35.4033	34.2661	36.0703	36.3642	35.8388	37.1773	37.4237	35.3899	35.7399	36.3352	36.4265	35.9682	35.5892	35.7985	37.7115	34.4274	34.4509	32.4909	37.0946	34.5405	35.608	35.8581	35.4907	34.0762	34.8031	34.9879	34.8424	33.5242	35.9211	36.4452	37.138	36.1172	35.7944	34.343	36.5083	36.7526
P01859;A0A286YEY4	34.545	34.8675	34.7395	33.5876	34.1515	33.9151	32.9415	33.1703	33.1902	33.5991	33.1724	34.703	34.8085	33.5902	31.5724	34.2948	34.9605	33.4076	36.0222	35.714	32.899	33.5516	33.6009	34.1249	33.7633	33.5587	33.1675	35.8364	33.3908	31.8979	30.0236	35.5737	32.8783	35.0629	34.6267	33.6517	33.479	33.6684	32.998	33.4435	32.296	34.141	33.8463	35.1899	35.5104	33.8654	31.8807	34.6047	35.134
P01860;A0A286YES1	31.552	31.5903	31.4561	30.6006	29.1739	29.3113	28.2583	30.3311	28.7078	30.8094	31.3393	31.0975	31.2282	30.1986	29.1078	31.2825	32.1317	29.8933	31.4549	32.2938	29.6682	29.5326	29.9338	31.2803	29.8941	31.3381	31.6856	32.5122	29.6381	29.7961	28.5599	32.9518	30.951	30.8567	30.7897	30.1197	29.4917	29.7862	28.5381	30.819	29.6367	30.4641	31.2856	31.255	31.2931	30.9198	29.9985	32.3618	32.7575
P01871;A0A1B0GUU9	33.4606	32.4473	32.943	33.0602	32.203	32.7271	32.4146	31.3889	30.7226	33.2475	33.808	32.9363	33.4296	32.5675	30.1218	31.8057	33.7214	31.4691	33.7652	33.6117	31.0027	32.5356	31.8125	31.6927	31.0365	33.5567	34.4996	34.3524	31.5092	31.0751	29.8958	33.8315	31.8438	31.5798	31.416	31.7712	32.1528	32.5372	32.2298	31.1902	30.3204	33.4235	34.0967	33.3974	33.8245	33.0314	31.1013	32.6359	33.2372
P01891	NA	NA	NA	NA	NA	NA	NA	NA	NA	NA	NA	NA	NA	NA	NA	NA	NA	NA	26.2496	26.116	26.947	26.3493	NA	25.621	NA	25.1851	24.694	NA	NA	NA	NA	25.2651	NA	27.0248	26.2277	25.4625	NA	NA	NA	24.8372	NA	25.0121	26.4738	NA	NA	25.1002	NA	27.535	26.6561
P02008	25.1455	NA	NA	26.0258	NA	25.1992	NA	24.8273	NA	26.0364	25.9706	25.9867	NA	27.0767	NA	NA	25.3887	23.8994	NA	25.6537	NA	NA	NA	26.9643	NA	27.1205	28.0494	29.4027	NA	25.1144	NA	24.8229	NA	NA	NA	NA	NA	NA	NA	NA	NA	NA	NA	NA	NA	NA	NA	NA	NA
P02042;E9PFT6;E9PEW8	34.9075	34.3275	34.812	35.3638	34.4323	34.5445	33.7752	33.9646	35.1164	34.7463	34.5189	34.5474	35.5343	34.9197	34.0741	35.2295	36.0073	34.0263	36.8606	36.9434	34.9369	36.2341	34.8598	35.4013	36.8092	36.0731	36.2316	36.4751	33.2826	33.9986	35.0898	36.2258	34.8384	35.3703	34.0113	34.7883	34.9417	34.6072	33.9856	34.6494	35.7184	34.4067	34.3447	34.1142	35.5239	34.7357	34.7301	34.5917	33.5091
P02452	26.0017	27.467	NA	25.0566	27.2661	25.0672	24.2623	27.2123	NA	24.4535	27.6093	27.0901	27.7794	26.5144	26.3289	27.3395	28.4027	27.0516	28.3859	25.2888	26.0954	25.6534	28.1466	27.8124	NA	NA	26.5499	26.7785	25.5285	25.857	29.9652	NA	26.5451	27.4067	24.3258	24.3471	25.7858	25.7794	25.2513	26.0562	24.6381	27.1158	26.909	27.5516	25.4896	28.3923	28.1251	29.4646	26.7085
P02461	NA	NA	NA	NA	NA	NA	NA	NA	NA	NA	NA	NA	NA	NA	NA	NA	NA	26.7754	25.1469	NA	26.3813	26.0436	27.217	26.9683	NA	NA	26.1781	NA	25.7738	26.0121	27.3662	NA	NA	25.9291	25.2474	NA	25.9259	NA	25.2074	26.0626	25.9231	NA	26.0342	NA	NA	NA	26.2593	26.0792	25.6421
P02462;A0A3B3ISV3	28.1369	27.5219	28.2781	27.9271	27.0514	27.1199	26.6728	29.3976	26.1202	27.387	28.248	28.3472	26.4599	27.5639	27.7203	28.2632	28.3315	27.3682	27.3783	26.2851	27.2505	28.9344	26.5237	27.1296	27.2914	28.0134	28.5775	27.8053	27.0821	27.2123	27.8525	26.7394	27.7516	27.9336	27.9232	27.8071	27.9476	27.4904	26.8285	27.8609	28.0683	26.4739	28.3982	26.1981	27.681	28.6309	27.503	27.9107	26.6884
P02511;E9PR44;A0A024R3B9;E9PJL7;E9PNH7;E9PRA8	33.5972	32.9175	33.3851	33.3993	34.0702	33.5434	33.1551	33.6874	34.5315	34.0999	33.7663	33.9563	32.893	33.779	32.4436	33.3213	32.7572	33.1263	32.2415	32.7592	32.7415	32.4608	31.237	32.4541	33.4552	33.4992	33.2079	34.1878	33.0307	32.3388	31.6456	33.1774	33.7249	31.5947	33.9439	33.7442	32.8792	33.1933	31.5323	31.3928	31.814	33.3728	33.0084	32.1996	32.5789	33.8985	30.9816	30.8663	31.2119
P02545	32.0066	33.2027	31.9359	33.0633	33.2014	33.2086	33.003	33.0897	32.95	33.1459	32.9799	33.2819	32.7479	33.3079	33.3588	33.369	33.1788	32.3674	33.5079	33.2534	33.463	33.2244	32.9976	33.5829	33.2811	32.9402	33.6109	34.3716	32.9448	34.117	35.0643	33.5289	33.8038	33.21	31.7366	32.8771	33.3551	33.2347	32.9279	33.3005	33.0124	32.7921	33.7243	34.0073	33.312	33.5307	33.3171	33.8461	33.8714
P02549	31.4702	31.2891	30.4644	31.0595	30.2488	31.2698	30.2124	29.7574	31.5353	31.754	31.1174	30.7268	31.5971	32.1637	30.1143	31.5451	32.7312	30.0298	34.549	34.6207	30.5911	33.0409	31.6444	30.8134	33.2696	33.1677	33.9914	33.3101	28.4471	30.9766	32.6149	33.8942	31.6364	32.116	30.3779	31.2128	30.3452	31.2987	30.3757	30.0842	31.9347	31.0175	31.3857	31.2103	33.262	31.4805	30.8264	31.7729	30.4784
P02647;F8W696	35.7242	34.8941	35.6964	35.3988	35.5146	34.7407	34.553	35.2541	35.631	35.2543	35.647	34.9071	35.8506	34.765	34.6681	35.5902	35.5788	34.9339	36.057	36.0884	34.7928	35.1519	34.2375	34.8343	35.7486	35.6392	36.1733	35.0828	34.7547	33.3875	33.7321	35.9723	34.4157	35.1197	35.2467	35.3148	34.112	34.1544	33.4376	34.4922	32.5374	34.7425	36.0724	34.2094	36.0096	35.2358	34.5766	34.171	35.1107
P02649;H0Y7L5;E9PEV4;E7ERP7	31.1348	30.5186	30.9179	30.2061	29.7679	29.7987	28.8746	28.963	29.5915	29.4826	30.7997	29.5953	30.1521	29.7987	29.3074	29.4515	30.2701	30.0627	32.7809	31.2032	28.8478	30.3374	29.643	30.4708	30.3554	30.8228	31.7664	30.4807	29.7556	29.3824	29.3072	30.2783	30.9208	31.5197	30.606	30.2529	30.5187	30.3706	29.1708	29.8636	30.7662	30.1214	31.0293	29.3233	30.5285	30.8933	30.2994	29.6768	29.5585
P02671	34.0078	32.8868	33.1391	32.8948	32.6155	33.0013	31.8409	32.9612	31.9363	31.0717	33.5558	31.8903	33.1159	31.8946	31.6852	32.8717	33.5393	32.1203	30.4859	30.147	30.8547	30.8409	30.8462	31.4865	31.1391	29.3866	31.6002	32.4075	31.3572	31.3784	30.236	32.0347	33.3792	32.3174	32.851	33.0485	32.5945	33.2555	32.0372	32.7688	31.5066	31.9676	34.129	32.3101	33.5006	32.8629	32.1484	32.8786	33.1593
P02675;D6REL8	33.5486	32.4947	32.945	32.8985	32.2369	32.7399	31.591	32.8729	32.1855	31.7544	33.7199	32.1261	33.1759	31.9791	31.2866	32.6918	33.3465	32.2004	31.2353	30.6826	31.1387	30.9527	30.4703	31.9422	32.2965	29.7889	31.4621	32.5485	30.7879	31.7517	30.2822	32.3015	33.0514	31.7327	32.1021	32.0438	32.5832	33.0645	31.955	32.2065	31.4162	32.1819	33.6233	32.6117	33.1612	33.2025	32.6179	33.0003	33.6373
P02679;C9JEU5;C9JC84	33.8559	33.0357	33.0726	32.9405	32.895	32.8085	32.0148	32.8479	32.4859	31.7116	33.519	32.3267	33.25	32.4015	31.7993	33.2083	34.0647	32.3943	30.8279	30.6116	31.3726	31.0751	30.6781	31.9856	31.6358	29.6825	31.4084	32.8196	31.068	31.4333	30.1534	32.689	32.8083	32.2758	32.7435	32.8737	32.3813	32.6532	31.9936	32.5459	31.3168	32.2598	34.2131	33.1441	33.5695	33.2585	32.766	33.5396	33.8769
P02730;A0A0A0MS98	32.0493	31.667	30.9546	31.7338	31.2249	31.5803	30.8028	30.3227	32.0919	30.2321	30.5199	30.0409	30.8633	29.6003	28.7534	30.5491	31.9753	28.8483	33.9215	34.1757	29.0655	31.3304	30.2096	29.5647	32.3585	32.3447	33.1486	33.1793	28.0224	30.0536	32.4331	34.3187	31.5826	32.2716	30.2418	30.9335	31.0289	31.5823	29.6419	29.0339	31.7867	31.4853	29.9108	31.0991	32.8083	30.7848	31.3984	31.537	30.4062
P02741;Q5VVP7	27.6148	NA	NA	26.0969	NA	NA	25.8843	24.3206	26.6535	NA	26.2104	NA	26.4355	NA	NA	25.4974	25.5422	NA	NA	NA	NA	NA	NA	NA	NA	NA	NA	NA	NA	NA	NA	NA	NA	NA	NA	NA	NA	NA	NA	NA	NA	NA	NA	NA	NA	NA	NA	NA	NA
P02743	30.494	30.3499	29.9704	30.523	31.0091	29.642	29.5919	30.2864	31.0548	29.4349	30.4633	28.3452	30.5612	29.6524	29.7249	30.8558	31.2314	28.494	31.0792	30.6658	29.4974	29.2816	29.1885	28.6421	31.2782	29.9116	30.3735	30.4267	28.6894	27.9872	29.2991	31.056	27.838	30.1445	29.2295	29.982	29.7777	29.5577	28.4287	29.9151	27.173	30.421	30.74	29.6786	30.5703	30.2571	29.8399	29.8056	30.5514
P02745;X6RLJ0	27.3553	27.6641	25.2144	28.4057	27.1738	27.9121	27.7131	27.0946	26.1637	27.331	27.4217	26.9194	27.7951	26.998	26.4186	26.791	28.2157	25.7461	28.0932	27.4545	25.7604	27.2299	27.0861	26.4327	26.5161	27.5958	27.0788	28.5398	27.7844	25.7063	25.543	27.864	27.4713	27.7293	25.0968	27.6434	27.4312	27.6572	26.2864	27.8085	26.0332	24.5641	26.4206	25.7413	26.445	26.3853	25.9305	26.55	26.5601
P02747	29.7581	29.4404	28.4395	30.3558	29.0936	29.429	29.3635	28.8268	28.134	28.3839	28.6004	28.3877	29.1638	28.2464	27.6767	28.4991	29.2166	26.5519	29.9676	28.9669	26.8125	28.5492	28.3955	28.2685	27.8847	28.5448	28.7328	29.4269	27.282	27.0601	27.4033	29.8104	29.316	29.3142	28.4907	29.6862	29.4382	29.3881	28.9228	29.293	28.1158	26.9214	28.1938	27.9491	29.1173	29.1537	28.2586	28.716	29.3379
P02748	28.8156	28.3026	28.0341	28.7388	27.7335	27.8027	27.2377	28.4473	27.1381	27.8457	28.7321	27.4556	28.4502	27.1662	27.6757	27.4228	28.8798	27.5615	29.0832	29.3065	27.7812	27.9498	27.5417	27.5934	28.8798	28.3319	29.2282	27.9165	26.6656	25.9525	27.5689	29.5809	28.6585	28.2496	27.7367	28.4901	27.883	27.7312	26.8734	27.7347	28.4313	28.3661	28.6833	28.2335	28.8874	27.6684	27.9983	28.2676	28.917
P02749	29.8929	29.8933	30.4262	30.2041	29.7664	30.3075	28.138	29.3401	29.6074	29.9947	29.846	29.8603	30.3164	29.8167	30.0168	30.3492	31.2653	28.4212	31.612	31.7807	29.31	30.6902	29.2738	30.0337	31.9955	30.4177	29.3991	31.5008	28.2718	28.0847	28.7707	31.6967	30.2835	30.3262	30.2488	30.4063	28.8809	29.5561	28.6002	28.4628	28.5828	30.6851	30.5664	30.7964	31.0862	30.1091	29.9464	30.5491	31.1653
P02750	29.6577	29.632	28.2867	29.1854	28.4688	28.8188	27.2749	28.2842	28.9565	29.2241	29.9814	28.2499	29.5395	27.428	28.2542	29.025	29.4691	28.6752	29.935	29.2976	28.3066	28.5653	27.4849	28.4663	29.4094	29.3488	30.435	30.6681	28.0066	26.4262	27.7847	30.0943	29.3151	29.0694	28.2005	29.3142	28.382	28.8186	27.5229	28.3403	29.2954	29.426	30.5817	29.268	29.6646	28.1421	28.7079	29.4201	29.4541
P02751	29.8017	30.2614	29.19	29.3282	29.2634	29.6437	28.823	30.3745	29.4626	29.6142	28.5762	28.2381	29.9119	29.5551	29.5861	29.5863	30.3457	29.5126	30.5218	29.7405	29.1194	30.2933	30.5132	29.2942	29.9017	29.2963	29.2744	30.1357	28.6161	30.0717	29.9693	30.0011	29.6548	30.5258	29.1742	29.7308	29.2785	29.9865	29.0667	29.8228	29.5284	29.3922	30.3058	29.8821	30.9941	30.1428	30.6521	30.3824	30.1305
P02760	28.8679	30.4664	28.9071	29.4193	28.9926	28.79	27.962	28.3032	28.9579	29.2636	29.9816	28.9458	29.3322	29.1882	29.0288	29.2668	29.5961	28.0921	31.6719	30.7216	28.8531	29.5638	28.5048	28.0246	30.1274	29.9834	30.3849	30.3146	27.305	28.1756	28.2323	29.9383	29.025	30.4828	28.7491	29.891	29.263	28.5898	27.912	28.3788	28.389	29.2631	30.2383	29.0574	29.7751	29.3872	29.0624	29.5013	29.4022
P02763	31.6887	31.3709	31.7407	31.5681	31.1637	31.5299	30.5245	31.6777	31.3247	31.2866	31.6685	31.5083	32.0239	31.1128	30.8017	31.704	32.5725	30.613	33.0552	32.3396	31.3936	31.168	30.9801	31.72	32.1379	31.2405	32.0298	33.1958	30.7922	30.2542	29.9924	33.1883	30.4079	32.4615	31.5963	31.4291	28.4805	30.5958	30.7535	29.7889	30.6063	31.56	32.2548	31.9829	32.3626	32.2775	31.4233	32.0969	32.7896
P02765;C9JV77	30.3067	30.3499	30.9265	31.0731	30.5342	31.0814	29.2275	30.2453	29.9063	31.558	31.3693	31.3182	31.6497	30.4692	30.0469	31.9576	31.62	29.5822	32.7317	31.326	29.9237	30.4134	30.1965	30.5791	31.0983	32.3739	32.2877	33.0306	30.501	30.3763	29.51	32.9394	30.6194	32.1429	30.0829	30.8521	31.1984	31.8495	30.6185	30.2144	30.3732	31.6814	31.6701	31.6968	31.5907	32.0429	31.5995	32.9292	32.3071
P02766;A0A087WT59;A0A087WV45	29.2448	30.5101	29.3786	30.2421	31.213	30.0729	28.6167	30.7161	31.9696	30.4798	30.6532	29.816	29.9731	29.5602	29.5399	30.5026	30.4817	29.5344	32.7565	32.4437	30.5749	30.2435	29.7949	30.2226	32.4367	30.6311	30.3563	32.3104	29.026	29.0764	29.1877	32.1575	29.6258	30.0347	29.2297	30.7967	30.5425	29.5453	28.3041	29.7948	30.1116	30.2392	30.007	30.5353	30.471	30.0547	30.6393	29.8353	31.095
P02775	27.3091	26.4598	26.838	26.592	24.6629	25.1811	26.0169	NA	25.4604	26.2222	26.5934	26.1116	26.5447	26.2404	25.3074	25.768	26.7693	25.6958	29.0017	27.2638	NA	27.7491	NA	NA	26.9495	NA	27.0859	28.6209	25.1107	24.6551	27.2868	29.3488	NA	NA	NA	NA	NA	NA	NA	NA	NA	NA	NA	NA	NA	NA	NA	NA	NA
P02776;P10720	25.0635	26.7061	NA	24.9176	23.5219	NA	NA	NA	26.3467	24.5337	NA	25.3713	NA	NA	24.3557	24.8503	27.0318	24.1001	28.5301	26.0619	NA	25.9191	NA	25.6231	24.8482	26.4426	27.4074	27.0969	23.0986	NA	26.4898	28.2335	27.0426	27.9821	NA	25.5547	25.7831	NA	NA	NA	NA	NA	24.7849	NA	28.6513	NA	24.5751	24.5385	24.7818
P02786;G3V0E5	26.064	28.0009	26.0305	25.7222	26.3104	26.5482	26.2368	26.5417	25.9222	26.1305	25.9071	25.7547	26.2781	25.9661	25.7641	26.4152	25.9764	26.7795	26.7241	26.4708	25.7193	25.6869	27.1774	24.3791	25.4732	25.8316	25.4037	NA	25.4593	28.45	25.6192	26.3988	25.9222	27.0648	25.7847	25.8539	25.8313	26.3216	25.8602	26.7232	26.0069	27.1328	26.0972	25.1883	26.4926	26.2954	26.7831	27.8993	26.8458
P02787	36.3266	37.4249	36.4317	36.7185	36.5819	36.3708	35.4317	35.8056	35.7802	36.2745	36.3488	35.7004	35.9282	35.7537	35.4246	36.3151	36.4063	34.7587	36.9861	36.5437	35.5368	35.9318	35.509	36.0849	36.2609	36.3147	36.6395	36.8422	35.2772	34.9304	35.044	36.8128	34.7985	36.666	35.6212	36.2969	36.512	36.0312	35.0462	35.4982	35.9322	35.8626	36.464	36.3202	36.0474	36.4442	36.3551	37.3057	36.848
P02790;Q9BS19	34.0153	34.12	34.2966	34.7822	33.8797	33.5222	33.0895	32.828	33.6138	33.4604	33.688	33.6709	33.8626	33.5576	33.1246	33.8126	34.2945	33.0031	34.8269	34.5829	34.0182	33.2784	33.5108	33.3726	33.947	33.7536	34.0015	34.6925	32.7083	32.1704	31.8804	34.1392	33.0342	34.1849	34.1101	34.7014	34.2797	33.5013	33.1862	33.1679	34.0416	33.8174	34.3791	34.2293	34.3325	34.231	33.7699	34.0538	34.3726
P02792	30.8344	28.3967	31.6718	31.0739	32.4326	31.7987	31.302	31.483	32.3109	31.1327	30.9906	31.8143	29.9799	31.9219	31.161	30.3654	30.6518	31.4247	29.4782	33.9933	31.1109	30.6208	33.3061	31.3141	31.0325	31.6556	29.8735	33.1451	30.7717	31.2838	30.2343	30.6631	29.8578	26.7835	31.9434	31.2969	29.528	29.9483	29.204	28.1182	29.001	31.6707	30.1058	31.8731	30.8398	32.2213	31.1041	29.3396	30.5247
P02794;G3V192;G3V1D1	31.1144	29.3138	31.7383	31.042	31.6229	31.2984	31.6218	30.6978	31.8549	31.2062	31.0724	31.6965	31.1678	31.9034	31.6628	30.4907	31.6692	30.9913	29.2628	32.5707	31.0296	30.6802	32.3817	31.2885	30.29	31.7627	30.3776	32.415	30.5698	30.5459	29.8263	30.7362	31.5224	31.054	32.8141	31.7039	30.9179	31.4891	31.8576	29.8478	29.7402	31.484	32.0328	31.2411	30.5135	32.2974	31.9367	29.0569	31.1592
P03905	NA	23.935	24.1215	NA	23.4306	24.1574	NA	23.9763	NA	NA	NA	NA	23.6161	NA	NA	NA	NA	NA	NA	NA	NA	NA	NA	NA	NA	NA	NA	NA	NA	NA	NA	NA	NA	NA	NA	NA	NA	NA	NA	NA	NA	NA	NA	NA	NA	NA	NA	NA	NA
P03915	23.771	23.964	23.5401	24.1583	24.1375	NA	NA	NA	NA	NA	NA	23.5416	23.995	NA	NA	23.5413	23.5616	NA	NA	NA	NA	NA	NA	NA	NA	NA	NA	NA	NA	NA	NA	NA	NA	NA	NA	NA	NA	NA	NA	NA	NA	NA	NA	NA	NA	NA	NA	NA	NA
P03950	27.5718	26.0759	28.5699	27.25	26.6611	26.2496	26.6966	26.6412	NA	27.7753	28.2469	26.947	27.716	27.2722	27.7845	27.0482	27.408	27.8012	27.4192	26.8248	28.4487	27.3037	26.849	28.4674	NA	27.6573	28.3755	28.9468	27.6643	26.9519	27.8776	28.0606	27.8516	27.7282	27.4187	27.8662	27.966	27.5185	27.5608	28.1507	27.1749	26.9991	27.794	27.9692	27.0177	27.4073	26.3715	28.4217	27.6753
P04003	30.2452	29.3613	28.4485	30.2415	28.8464	28.8517	27.3029	27.9318	28.8746	28.4479	28.8539	27.439	27.9073	27.3548	27.003	27.9042	29.0362	26.4269	30.2766	30.1868	27.2237	28.6194	27.8142	27.3288	29.2359	29.7999	29.7756	30.1093	25.0517	26.4411	27.2316	29.9596	29.3475	28.7055	27.5888	28.8916	28.8107	28.9412	27.0463	27.9619	28.9712	29.2944	28.4365	28.2978	29.0166	27.6771	27.5409	28.1864	28.286
P04004	29.4606	30.3689	29.2021	29.862	28.9249	29.6489	28.4958	29.4327	28.6332	29.9068	30.0409	29.0392	30.4209	29.2895	30.0973	30.7188	30.504	28.6849	31.3001	31.1423	29.0219	30.411	29.507	29.2404	30.75	30.4193	30.5848	30.6856	28.7038	28.452	29.0721	30.9377	29.9558	30.2479	29.2467	29.883	29.6461	30.1721	29.0854	29.7353	29.9042	30.0459	30.3995	29.4327	30.8608	29.8496	30.5279	31.3111	29.7131
P04040	33.0241	32.4497	32.5393	32.7919	33.5301	33.2391	32.9649	32.8413	31.6174	33.4538	33.0536	33.1169	33.1994	33.5042	33.1459	33.1998	33.886	32.7013	33.7815	34.2057	32.8103	34.0977	32.9486	32.9149	32.8234	34.3714	34.7185	35.5495	33.1873	33.2546	34.4514	35.2617	33.0776	33.1995	32.8013	32.9756	33.6546	33.5343	32.9183	33.2877	32.7524	33.3243	33.1104	33.3813	34.2007	33.5261	34.0656	33.2991	33.2212
P04066	26.2291	25.5676	24.9937	25.6001	24.4808	25.9195	25.5438	25.4448	25.4381	24.3565	25.592	25.3417	25.3582	24.5416	24.5293	24.1989	25.0065	24.7483	25.4153	25.6387	25.5765	25.815	26.0927	24.8177	23.866	NA	24.789	23.9083	24.91	24.8669	24.3714	NA	23.8685	25.397	25.2825	NA	NA	26.1108	25.0759	NA	25.401	25.2839	26.161	25.9471	25.5802	25.339	25.3817	25.8797	25.6925
P04075;J3KPS3;H3BQN4;H3BPS8;H3BUH7;H3BR04	32.0751	33.1505	33.1934	33.2468	33.1005	33.2514	32.9598	32.7956	33.1846	33.1351	33.2929	32.8263	33.2253	33.29	32.8002	33.2941	33.3171	31.9946	33.1495	33.1173	32.7969	33.304	32.6769	33.082	33.253	33.5891	33.269	32.8523	33.1463	32.8929	32.9298	32.7091	32.2393	33.081	32.8804	33.2436	33.1109	33.5404	33.1758	33.1365	32.6014	33.3472	33.2752	33.1054	33.5655	33.7418	33.2795	33.1986	33.0206
P04080;A0A1W2PQG6	31.0441	31.5789	31.7654	31.8075	31.4859	31.0678	31.356	30.6776	30.3947	31.6998	31.9609	31.7538	31.8834	31.5523	31.9358	31.6686	31.4102	31.7821	30.4705	30.9294	31.777	31.1249	32.1587	32.1173	30.806	30.7803	31.2371	31.7202	32.0515	31.8693	31.2998	31.3351	30.706	30.3959	31.7758	31.3468	32.1445	31.6672	31.667	31.2164	31.2848	30.4286	30.7169	30.4241	30.184	30.2928	31.0406	30.859	30.7365
P04083;Q5T3N1	33.6557	33.186	33.9064	33.8236	34.0542	33.7154	34.4664	34.0425	34.3	34.2009	34.2786	33.522	33.7254	34.445	33.4907	33.6983	33.7996	34.1177	33.6492	34.0426	33.9947	33.9927	34.0252	33.8714	34.2433	33.959	33.8123	33.3177	34.126	34.0785	33.4349	34.0126	33.97	33.5275	34.1043	33.9529	33.1119	33.8541	34.4321	33.8985	32.6407	34.0084	33.9951	33.7076	33.6516	34.1609	33.053	33.2357	33.1587
P04114	32.5152	32.3748	31.866	32.9293	31.6817	31.8049	30.283	31.1655	32.7696	32.0333	31.7088	30.7295	32.0243	31.649	32.6947	32.5964	33.1383	30.4644	34.1395	33.5173	30.6895	31.759	30.4966	30.6677	33.2281	32.7647	32.7911	32.0635	29.2647	30.5478	31.8751	33.0394	32.1789	33.1353	31.3995	32.8338	31.7715	31.7934	29.9369	31.33	32.7879	32.6554	32.31	32.0457	32.6802	32.2757	33.3677	33.0152	32.8469
P04179;F5H3C5;F5H4R2;F5GYZ5;G8JLJ2	30.6547	29.9869	30.2524	30.2848	30.3595	30.8412	30.8367	30.0687	30.9041	30.3684	30.0199	30.4316	29.8715	30.0613	30.3422	30.0578	29.8542	31.1067	29.444	30.4445	30.6206	30.6381	30.8255	30.7414	31.0896	30.4261	29.7069	31.002	29.9016	30.7631	30.7362	30.0497	31.0776	30.4679	30.9513	30.678	26.5529	29.8106	29.221	29.8617	27.6526	31.4146	30.1994	30.0567	30.0942	30.2162	30.9459	30.1913	30.4349
P04181	25.1475	NA	25.6806	23.859	22.3364	21.2283	23.6455	26.5005	22.1515	25.9608	26.2395	23.4801	23.7169	NA	25.078	24.7355	22.1891	23.2181	NA	NA	24.0936	23.8363	24.8249	23.5899	21.2258	22.7942	NA	NA	23.9344	22.0436	23.5034	NA	23.2839	23.8333	22.2617	23.5419	NA	NA	24.0713	20.8019	NA	23.8722	21.5298	21.7216	22.3488	23.861	23.7475	24.0566	23.8286
P04196	28.0956	28.0205	27.6329	28.5805	29.6972	28.5877	27.6043	28.3578	28.3158	29.4877	29.9564	28.2929	29.9276	27.4919	29.4863	28.7522	29.1696	27.5423	30.8975	30.377	27.4529	28.9134	28.2593	28.3582	28.6962	29.9079	30.2598	30.2547	27.671	26.9847	28.1432	29.0198	28.1196	29.4735	28.1183	28.6791	29.536	29.388	26.9693	27.8586	28.2684	29.656	30.5877	29.2373	30.4356	28.0242	30.0679	29.1717	29.0796
P04217;M0R009	30.8957	31.0329	30.3419	31.156	31.1616	31.1329	29.811	30.9524	30.7194	31.5631	31.2964	29.9202	31.0701	29.8245	30.6677	30.0202	31.3545	29.5387	32.2292	31.7973	30.0396	31.0913	30.1431	31.1621	31.2956	31.2474	31.4473	31.379	29.7313	29.1563	29.25	32.021	30.2425	31.3971	30.4975	31.6467	30.5318	30.6836	29.5335	30.6558	30.6217	30.7557	31.8459	30.2586	31.5941	29.944	30.6408	30.0634	31.364
P04229	24.4987	NA	NA	26.156	NA	NA	24.7428	25.1584	NA	NA	25.6022	25.1154	NA	25.5082	24.8386	NA	25.4825	27.3394	26.0295	23.6297	26.9106	NA	28.1102	26.7174	NA	25.2215	NA	NA	NA	26.3042	NA	24.0936	NA	NA	NA	NA	NA	NA	NA	NA	NA	NA	NA	NA	NA	NA	NA	NA	NA
P04271;A8MRB1	28.4214	23.8586	NA	26.8081	29.6807	26.5634	27.748	28.9651	28.2025	29.7611	29.1329	NA	27.1624	29.1067	NA	25.3173	NA	29.3995	25.9441	NA	28.847	26.7456	NA	27.3156	28.8124	29.3297	29.5671	27.1994	28.6163	27.0803	28.1186	26.6967	28.6198	26.0034	28.5421	27.2778	27.8665	26.4658	27.3785	25.0695	28.4867	29.5569	29.7441	28.476	29.6965	28.7022	28.2573	27.7704	26.7068
P04275	29.3609	29.5526	29.7004	29.3654	29.4836	29.4096	28.9228	29.1048	29.3879	28.9773	29.0615	29.7063	28.4665	29.345	28.771	29.0669	29.376	28.695	28.9762	29.47	29.016	29.1704	28.4005	28.768	29.3826	30.0303	29.4836	29.938	28.1229	29.4074	30.1485	29.4262	29.1888	30.1444	29.0809	29.0802	30.1125	29.4779	28.9267	29.6888	29.7162	29.1172	28.673	29.3849	28.5694	29.9141	29.8558	29.1889	29.2482
P04406;E7EUT5	33.1743	33.3735	32.8946	33.0712	33.476	33.2745	33.2539	32.6766	33.2266	32.8749	32.6487	32.8399	32.6732	33.0676	32.4898	33.0457	33.0146	33.5149	34.137	33.5386	33.205	33.3603	33.5351	33.8257	33.6334	32.9113	33.1426	34.293	32.6122	33.1496	32.9498	33.8832	32.7527	32.9895	32.399	32.8576	32.7189	33.091	33.1468	32.9353	32.8846	33.3128	33.0203	33.8912	33.2676	33.313	33.3194	33.6216	33.3311
P04424;F8W943	23.7695	23.9044	23.3006	23.574	24.4688	23.7548	24.012	NA	NA	23.5742	24.0485	24.4437	24.4111	24.9341	24.2151	24.5551	24.4146	24.697	25.1199	25.3199	24.891	23.8635	24.6827	24.3148	24.4117	25.2583	25.0094	23.8352	24.6272	23.9211	25.3023	25.0027	NA	24.6011	24.0974	NA	NA	23.172	24.3584	23.3074	NA	24.4681	24.5844	24.8649	24.864	24.4994	24.7715	24.7736	24.696
P04432;P01597	25.8448	25.1182	24.6259	25.9283	24.582	25.3783	23.5119	25.1357	25.3939	NA	NA	25.4851	24.853	24.908	NA	25.1351	24.6228	25.6471	26.1138	26.2444	25.0759	NA	NA	NA	26.2097	NA	25.8955	27.244	23.8053	24.0296	NA	NA	NA	NA	NA	25.0742	NA	NA	NA	NA	NA	24.9864	25.7084	25.4689	25.8453	24.575	NA	NA	24.8976
P04440;A0A0G2JII1;H0Y7G7;A0A140T9P1;A0A140T976;H0Y5P2;A0A140T9Y0;A0A140T9I3;A0A140T8Z3	NA	25.175	NA	25.3225	NA	24.8148	24.6735	24.6981	NA	NA	23.9908	24.6813	24.3102	25.5577	NA	NA	25.1373	25.7443	NA	NA	26.3595	25.4537	24.7772	24.6179	25.6941	NA	NA	NA	25.4352	25.3668	NA	NA	NA	NA	NA	NA	NA	NA	NA	NA	NA	NA	NA	NA	NA	NA	NA	NA	NA
P04792	32.6083	32.8025	32.317	32.6784	32.5045	32.9505	32.3161	32.7963	32.9593	31.9443	32.5171	32.6328	32.1184	32.4678	32.4499	32.763	32.6266	32.2492	31.8329	31.844	32.4437	32.8419	31.9428	32.1592	32.4192	31.5774	31.7952	31.7088	32.1848	31.9414	32.0405	31.9576	31.0357	32.2923	31.8174	31.9637	31.0398	32.0942	31.9868	31.7888	30.8974	31.8318	32.626	32.6471	32.1505	32.6882	32.3162	32.1034	32.1974
P04839	27.0172	27.6269	26.5591	28.2971	26.6696	25.7304	27.1577	26.4713	26.9026	24.6487	24.6208	25.655	25.3242	24.2733	26.3155	24.4239	23.6856	23.7325	24.7698	NA	25.192	23.4681	25.67	21.8873	24.4903	24.424	24.8695	NA	23.7161	25.7726	27.0388	25.3562	25.0677	23.4041	24.0036	25.6597	23.6298	24.9789	25.3143	25.6262	25.2787	25.3165	24.7773	25.1589	23.568	24.8315	24.5042	24.3598	25.5752
P04843;B7Z4L4	29.7589	29.578	29.727	29.521	29.4187	30.0493	29.8697	30.2543	28.5342	28.7595	28.5263	29.0708	28.6075	29.2506	28.8998	28.7379	29.0517	29.169	28.7705	28.8718	29.1161	29.1914	29.3857	29.1676	29.0329	28.6428	28.1111	28.9266	28.8609	28.7797	29.7971	28.6785	29.4103	29.3559	29.4381	29.3811	29.3835	30.0079	29.4276	29.6399	29.8863	28.6968	28.4355	28.7217	28.6557	28.6122	28.3495	28.4063	29.1853
P04844	28.1339	28.0899	27.7742	28.2542	27.7029	27.4125	28.1525	27.8024	27.867	25.7827	26.6664	27.0301	27.141	24.7218	26.0402	26.3983	26.3682	25.7649	26.423	26.2019	25.0925	NA	26.619	26.8835	26.8717	26.9171	26.5675	27.3545	25.9994	27.5567	27.6202	27.2826	27.3151	26.8452	27.3767	27.5996	27.6618	27.6429	26.6032	27.1366	27.3679	28.3073	27.3967	28.0895	27.519	27.3452	27.7043	26.8597	28.052
P04899	30.5644	30.1735	30.9611	30.5685	30.5903	30.4721	30.3314	30.546	30.5532	30.4201	30.7871	30.3169	30.0456	30.8855	30.3868	30.9537	30.8736	30.0904	29.9071	30.2388	30.4865	30.4113	30.1427	30.5832	30.6891	30.4207	30.3947	30.5178	30.081	29.4841	30.3323	30.3179	30.5695	29.9528	29.8509	29.9786	30.0221	30.3183	30.1414	30.1825	30.4116	30.802	30.0245	30.5113	30.4668	30.6442	30.1699	30.5882	30.3082
P05023	28.6341	28.8986	28.5961	28.5134	28.4241	28.3321	28.4104	28.0445	28.5075	26.7694	27.3899	27.3292	27.6457	25.8288	26.7581	27.6164	27.5621	26.5819	27.2823	27.8609	26.3241	25.0404	27.5449	27.1881	27.2935	27.8859	27.4476	27.7898	26.7028	28.3147	28.5356	27.7995	28.2506	28.885	27.7483	27.802	28.5121	28.6308	27.783	28.1782	28.6367	29.1171	28.3797	29.2053	28.6445	28.3058	28.511	28.437	29.6925
P05026	NA	NA	NA	NA	NA	NA	NA	NA	NA	NA	NA	NA	NA	NA	NA	NA	NA	NA	NA	NA	NA	NA	NA	NA	NA	NA	NA	NA	NA	NA	NA	NA	22.9005	23.0746	NA	NA	22.8283	22.879	NA	22.5751	22.7366	22.5897	23.0255	25.3839	22.5043	22.7509	22.7307	24.0698	24.8925
P05062;A0A3B3IS80;A0A087WXX2	NA	NA	NA	NA	NA	NA	NA	NA	NA	NA	NA	NA	NA	NA	NA	NA	NA	NA	NA	NA	NA	NA	NA	NA	NA	NA	NA	NA	NA	NA	NA	NA	18.2312	20.8084	NA	NA	NA	19.5439	NA	19.9733	19.3946	17.4604	NA	18.7802	18.9362	NA	19.4474	NA	NA
P05089	NA	NA	NA	NA	NA	NA	NA	NA	NA	NA	NA	NA	NA	NA	NA	NA	NA	NA	NA	NA	NA	NA	NA	NA	NA	NA	NA	NA	NA	NA	NA	NA	NA	NA	NA	NA	NA	NA	NA	NA	23.2466	22.5382	22.9271	23.1243	23.5035	NA	22.6236	NA	22.9934
P05091	31.9713	32.2587	32.5111	32.666	32.9502	32.7631	31.8428	32.4713	32.9586	32.6561	32.1819	32.0092	32.8862	32.7845	32.6894	33.1242	33.2239	31.8332	31.3788	31.9841	32.0369	32.3133	31.6214	32.3499	32.5493	32.5119	32.8561	32.3907	33.1333	31.9978	32.8911	32.2899	32.2403	32.015	32.0811	32.5723	33.0688	32.4476	31.7539	32.9979	32.3932	32.6466	32.6854	32.4764	33.5267	32.6823	32.7321	33.1383	33.1581
P05106;H3BM21;I3L4X8	25.2615	25.1664	25.1457	24.5983	24.453	24.7002	23.936	NA	NA	24.4837	23.3436	24.1688	24.6032	25.4797	23.9294	25.6487	27.5307	24.5572	29.5999	27.7563	24.1678	25.8226	24.8703	24.4233	26.5137	26.8949	26.2431	26.5376	23.0887	24.7555	27.6146	27.4089	24.6174	25.6066	NA	24.9322	25.5171	25.8111	NA	23.3923	24.5837	24.3576	NA	24.4538	28.3562	23.6837	26.6215	24.5025	25.8963
P05107	27.3902	27.5795	26.7314	27.0133	26.7586	27.4239	27.0497	26.8513	25.9162	26.6249	25.6638	26.6937	26.1321	27.667	26.3868	26.272	27.1603	28.034	26.8365	28.4523	27.9518	26.333	29.2925	26.0977	24.1436	26.2935	25.1715	25.3394	26.0677	30.0175	26.2238	22.9617	26.8577	26.6477	26.7451	27.1474	26.4276	27.1225	26.8437	26.0174	25.8764	27.2974	26.0681	26.5943	26.6369	26.964	26.8258	25.9291	26.2192
P05109	32.8099	30.6046	29.9674	31.9224	29.7787	30.5846	30.8564	29.8569	31.4774	30.1917	29.3418	29.5098	32.0917	31.781	30.0853	29.784	31.7286	30.5794	30.7563	30.2543	29.8824	29.8578	31.0818	31.3984	30.8324	30.486	29.283	31.4965	29.323	31.2554	29.9198	31.5648	31.5473	31.333	29.7518	31.5639	30.515	30.6563	31.4037	29.9206	31.8959	30.5882	30.2042	29.9097	32.1419	31.4268	30.6091	30.9065	29.8948
P05141	27.6149	27.7688	28.3963	28.3206	28.3213	28.3346	27.2895	27.7164	28.1272	27.5618	27.1884	26.9568	26.9988	28.0133	28.5224	27.7555	28.143	27.8129	28.2495	28.0288	28.8006	29.1296	29.3319	28.3752	27.9282	28.1255	28.3792	26.3328	28.5125	28.5613	27.8612	27.64	26.7019	27.5427	27.3685	27.2426	26.7627	27.3881	27.7412	27.3217	26.2973	27.5549	25.7526	27.7059	26.6202	28.4708	28.163	27.0665	28.043
P05154;G3V5Q9	25.6941	26.6298	25.538	26.2565	26.6775	26.582	25.699	25.7114	26.9309	25.4942	24.6501	25.2626	25.3852	26.2814	26.0662	26.8449	26.5997	25.6013	28.8052	27.8132	25.5381	26.9531	25.8976	25.44	27.7716	25.6487	26.0638	27.4595	25.1269	25.0781	24.73	26.6867	24.7713	27.6899	25.9448	26.6895	26.4659	25.5545	25.4135	NA	26.8892	25.6757	26.6977	26.694	26.7244	25.9762	26.1935	27.116	26.5035
P05155;E9PGN7;H9KV48	30.849	31.5328	30.2377	31.1099	30.8361	30.5156	28.9937	30.3311	31.0798	30.5928	31.6648	30.2483	31.2146	30.5824	31.2125	30.9663	31.5343	30.0177	32.4586	32.4393	30.352	30.5772	30.1292	30.7518	31.6043	31.5692	31.8574	31.7932	29.2935	29.7017	30.2015	31.5005	29.8157	31.6769	30.2032	30.9328	30.7301	30.1168	29.3882	30.4729	30.6775	31.0355	32.2054	31.4797	31.649	30.7112	31.4453	31.439	31.5271
P05160	26.341	26.6614	25.8881	26.965	26.2914	26.2648	24.1045	24.7744	25.6678	26.1529	27.3186	25.3493	25.8341	25.9157	24.2303	25.9077	26.8435	24.3699	28.1412	27.9325	23.924	25.2572	23.9556	24.8883	25.5089	26.482	27.8007	25.0191	NA	NA	23.1116	25.8498	24.0785	25.3679	25.0773	24.0819	25.8806	25.4247	24.1885	24.8672	25.657	25.9873	27.6323	24.9913	25.9928	26.1503	24.5649	26.8664	26.0053
P05164	29.3374	23.6928	24.1652	28.4559	22.4718	27.8821	25.2929	25.2213	29.0375	25.5151	23.4062	23.9287	28.1696	29.1602	25.6156	25.1831	28.3136	26.3045	28.7133	27.9793	25.2587	26.8638	26.8159	27.4033	27.9132	26.287	25.929	29.0986	25.094	27.3958	26.761	27.662	27.3225	26.5198	NA	26.4757	22.6496	27.1815	25.9699	25.1059	28.2306	26.1241	23.1758	25.5909	29.103	27.6587	27.6801	27.3624	24.9126
P05165;A0A1B0GU58;A0A1B0GWI4;A0A1B0GUX9;A0A1B0GWA1	26.5087	26.2751	27.4715	27.3826	27.3134	27.3283	27.4362	26.136	27.5516	27.0478	26.6629	26.7882	26.6862	26.9404	28.6724	28.0079	27.5001	27.0995	24.4637	24.7983	27.0991	25.9623	24.9847	26.3637	24.8401	26.9121	26.2349	NA	27.2039	26.2847	27.4903	26.5816	26.4278	26.4315	27.0373	26.8637	27.2784	27.4935	27.3395	25.5292	27.889	26.9016	26.0735	26.3976	27.2361	26.6376	27.9274	27.7899	27.7865
P05186	24.3368	24.1506	23.4207	24.9048	24.3292	25.3896	26.8908	NA	NA	NA	NA	NA	NA	NA	24.3568	NA	NA	25.6909	NA	24.9185	23.5792	24.0313	27.1569	25.2416	NA	24.566	NA	24.6947	NA	26.333	NA	NA	NA	NA	23.5037	24.8725	24.4524	25.253	26.9129	NA	24.7873	23.8461	NA	NA	NA	NA	24.5013	NA	NA
P05198;H0YJS4;G3V4T5	26.3166	26.1106	26.428	26.164	25.8211	25.9055	26.312	26.0338	26.3933	26.0732	26.2669	25.7606	25.9705	25.8572	25.7432	26.6306	26.5855	26.2335	26.632	26.8845	25.8752	26.5444	26.5618	26.6485	26.9866	26.9721	26.3936	26.7734	26.3207	26.7699	26.5947	26.6391	26.6178	26.1244	25.8245	25.583	26.3324	26.2374	26.1759	26.5263	26.7771	25.9869	25.5109	25.7399	26.0619	25.926	25.7535	25.8944	25.805
P05362;K7EKL8	26.1559	26.0474	25.5939	25.6738	25.5084	26.1013	25.3511	25.577	25.6063	25.8889	25.303	26.0085	25.4774	25.6844	25.5351	25.6787	25.5336	25.6783	25.7698	25.9578	25.426	25.1989	26.1903	25.4849	25.1921	25.7615	24.8888	NA	25.2678	26.3658	25.9683	25.5392	26.0168	26.261	25.7218	25.9782	25.9032	26.0268	25.9241	25.8317	25.9017	26.7592	26.433	26.6908	25.9816	26.0111	26.9149	26.7231	26.3757
P05386	25.4426	26.3294	NA	25.7839	NA	25.8343	24.7161	NA	26.4734	NA	26.955	26.5284	NA	26.3791	26.3733	27.3396	25.572	26.7182	26.8219	27.1567	27.246	26.6364	28.0938	27.0867	26.825	NA	NA	27.074	25.5612	27.3983	26.2662	26.122	NA	NA	NA	NA	NA	NA	NA	NA	NA	NA	NA	NA	NA	NA	NA	NA	NA
P05387;H0YDD8	27.0696	27.5537	27.1113	27.2843	27.4836	26.865	27.4197	27.7074	27.1892	27.6574	28.2712	28.2384	28.197	27.8083	27.9891	28.1931	27.9677	28.3099	28.0744	28.1407	28.3418	27.1482	27.7543	27.6352	27.1942	25.9339	26.7414	28.0792	27.9376	28.2608	26.9743	NA	27.8923	26.6811	26.8262	26.8853	NA	NA	25.807	26.7724	26.4022	26.105	26.6609	25.8499	25.7563	26.0928	25.8964	26.2441	25.8815
P05388;F8VWS0;F8VU65;F8VW21;F8VPE8;G3V210;F8VQY6;F8VRK7;F8VZS0;Q8NHW5;F8VWV4	28.3158	28.2749	27.9405	27.3885	27.2738	27.4368	28.2116	28.3006	28.2697	28.6168	28.7166	28.4379	28.6039	28.2936	28.7066	28.5612	28.194	28.515	28.0851	28.3581	28.5564	28.4753	29.4524	28.7988	28.3901	28.0899	28.1591	27.7394	28.2884	28.7683	28.4329	28.1551	28.4605	28.6185	28.1449	27.8208	27.2119	27.1931	28.6257	28.323	25.8071	28.086	29.0225	27.6836	28.1317	27.8393	28.1747	29.111	27.4364
P05455;E7ERC4	25.6868	NA	24.9615	25.9198	25.9338	25.3591	26.6409	26.7902	26.4223	26.523	25.9388	26.3764	25.8967	26.1286	25.9679	26.1033	25.4047	26.6027	26.1745	26.67	27.0675	26.2509	26.9464	26.7776	26.3966	25.1646	25.717	26.0752	26.3764	26.2129	26.5526	25.7027	25.8241	26.2001	25.8988	26.1916	25.675	25.8686	26.2434	NA	25.9548	26.4452	26.7917	27.1968	26.3438	26.5017	26.4434	26.8552	26.3318
P05534	NA	27.6798	NA	NA	NA	27.8424	26.6052	26.3011	27.3288	27.1774	NA	27.1987	NA	NA	27.3653	NA	NA	27.9091	25.653	NA	NA	NA	26.998	27.1944	27.172	26.8757	26.5991	27.4369	26.3334	28.3164	27.53	27.952	NA	NA	NA	NA	NA	NA	NA	NA	27.442	27.4606	NA	27.559	NA	26.4845	27.0437	27.0902	27.2114
P05543	26.4213	25.7677	25.7561	26.1853	26.4465	27.0774	25.0767	26.1695	25.236	26.7991	26.6626	26.4443	26.8403	26.3529	25.7697	27.2605	27.4509	25.538	26.9673	27.0257	26.1574	26.8917	26.3967	27.0705	26.2547	27.2099	27.4728	27.3236	25.2464	25.4708	24.8837	27.9918	24.9774	26.9396	27.0083	27.1287	26.6038	27.0927	25.7387	26.5944	26.3219	27.102	27.5352	26.8073	27.4843	26.2884	26.3146	27.6551	27.6167
P05546	29.5705	29.2582	28.2528	29.0017	29.3151	28.7765	27.2173	29.3504	29.538	28.8495	29.179	28.0135	29.348	27.9279	28.6173	29.0491	29.3472	27.6372	30.855	30.1809	27.6636	29.1175	27.5178	28.557	29.6857	29.9851	30.253	30.2605	27.8095	27.0684	27.9816	30.9932	28.3104	29.705	28.3207	28.315	28.1595	28.2762	27.3284	29.0188	29.2496	28.4779	29.468	28.7142	29.6163	28.1738	28.5761	29.2142	29.0207
P05556	30.9718	31.0299	31.2343	31.241	31.2611	31.098	30.9199	31.0091	31.2014	31.8144	31.4553	31.9489	31.1791	31.9175	31.461	31.3842	31.6471	31.0761	30.6945	30.7524	31.3329	30.8423	30.6183	30.7648	30.7583	31.7438	31.6477	31.6192	31.3549	31.5733	31.4627	31.2634	31.5764	31.8507	31.2859	31.616	31.7383	31.4515	31.1925	31.2695	31.5165	31.4026	31.8525	31.4555	31.3844	32.0065	31.9555	31.5559	31.478
P05783;F8VZY9	26.3036	28.1013	25.3272	29.0333	26.4831	28.4581	27.2346	29.3064	27.2713	28.3841	27.6623	28.5846	26.7133	28.7176	27.4062	27.2946	24.4528	NA	24.1173	25.6694	NA	24.8621	24.6819	24.7698	NA	23.4344	24.5393	NA	21.3703	22.986	NA	24.6547	28.5848	25.95	NA	28.2783	26.4355	28.4216	27.2946	26.6007	24.3199	28.4057	31.6359	31.0456	29.601	29.1523	29.829	31.1052	30.4336
P05976	23.7327	NA	25.8879	NA	NA	NA	25.136	28.5098	25.4418	NA	NA	NA	25.2146	NA	NA	28.9447	NA	NA	NA	NA	NA	NA	NA	NA	NA	NA	NA	NA	NA	NA	NA	NA	NA	NA	NA	NA	NA	NA	NA	NA	NA	NA	NA	NA	NA	NA	NA	NA	NA
P06132;A0A1B0GVN9;H0Y5R6;A0A1B0GVZ4	25.961	25.2709	25.1909	25.6117	25.7352	25.5656	25.1475	24.5456	26.1138	25.0102	24.7834	24.9935	25.237	25.7328	24.7308	25.4103	26.0025	26.0196	27.5763	27.952	25.9898	26.3517	26.24	26.0831	27.4331	26.6754	26.4332	26.7798	25.3911	25.6338	25.1468	26.7643	25.5998	25.3304	24.9512	25.3796	25.4739	26.059	25.1883	24.944	26.0156	26.0554	25.0754	25.2753	26.4491	25.4322	26.052	25.903	25.4337
P06241	NA	22.433	23.5427	NA	NA	22.8701	23.3771	23.2944	NA	NA	NA	NA	NA	NA	NA	NA	22.8957	NA	NA	NA	NA	NA	NA	NA	NA	NA	NA	NA	NA	NA	NA	NA	NA	NA	NA	NA	NA	NA	NA	NA	NA	NA	NA	NA	NA	NA	NA	NA	NA
P06310;A0A075B6S6	30.7604	31.1824	30.975	29.8917	29.4234	29.8755	30.2329	29.1218	29.3829	29.318	29.412	30.9582	30.8577	29.5496	28.4756	28.3245	30.7559	29.9384	31.535	30.7286	29.2954	29.4165	27.3253	27.5083	27.9609	30.3454	29.9994	31.252	29.5999	NA	27.2502	31.0667	30.1431	30.0895	29.3805	29.6681	29.0791	29.0563	29.7304	29.6261	29.1505	28.0718	29.5868	30.0869	30.5336	30.4974	NA	30.2388	30.2347
P06312	29.9103	29.8735	29.6254	29.2063	29.0465	29.2778	28.8181	28.9942	29.0733	29.3096	28.6547	29.7698	29.0232	28.8193	27.7191	29.444	30.1369	29.1623	30.6382	30.3334	28.1491	28.7072	29.23	29.3329	29.9067	29.7306	29.2494	30.9467	28.079	27.8218	27.17	30.0167	28.3452	29.5532	28.9781	28.8563	27.8822	28.4648	28.1248	27.7731	29.08	29.1553	28.9235	29.9407	29.6381	29.0396	27.3664	26.7446	29.31
P06331;P0DP08;P0DP06;A0A0C4DH41;P01825;P01824;A0A0J9YWU9	29.1039	28.9294	28.904	28.89	27.2931	28.4858	27.8183	27.7494	27.7657	27.7534	28.2265	27.9674	28.3899	27.7697	25.5658	28.5874	28.326	27.5315	29.3924	29.4139	27.4008	28.1346	28.0644	28.3021	28.0593	28.9092	29.0953	30.4225	27.0914	26.1747	25.0611	29.7662	28.6259	28.0642	28.2721	28.326	27.0027	27.7056	27.825	27.8302	26.867	28.7336	29.3121	28.8877	29.4093	28.1987	26.5333	28.868	29.033
P06396;A0A0A0MS51;A0A0A0MT01	32.5439	32.9313	33.0792	32.5098	32.7124	32.2827	32.2675	32.4618	32.3703	32.9734	32.9418	32.693	32.6723	33.0135	32.5065	32.573	32.8298	32.8139	33.1485	33.1601	33.0343	32.632	32.9078	33.0251	32.6893	33.3405	33.1165	33.6173	32.8266	33.2416	32.5187	32.997	32.2683	32.7641	33.0209	32.5913	32.863	32.4436	32.2397	32.2876	32.8224	32.2389	33.4701	32.688	32.2426	33.006	32.0116	32.6176	32.8351
P06576;H0YH81;F8W079	31.6632	31.4259	31.6382	31.3991	32.0329	31.0854	31.8356	31.8889	31.9147	32.009	31.5662	32.2163	31.9185	31.9481	32.2518	32.109	32.0937	32.3801	31.9237	31.7218	32.0949	31.8548	31.8211	32.0394	32.1776	31.7954	31.7827	31.8253	32.0409	31.766	31.7501	32.044	31.477	31.7609	31.4428	31.4732	31.3877	30.9918	31.6656	31.7243	30.6278	31.983	31.9175	31.7281	31.8348	31.8722	32.3649	32.2156	31.9451
P06681;A0A0G2JL69;B4DQI1;A0A0G2JIE7;H0Y3H6;E9PDZ0	25.6198	26.3503	24.9108	25.2776	24.9882	25.6615	24.9868	25.4377	25.4913	24.3827	25.1733	23.709	24.7573	24.3485	25.0788	25.295	25.538	24.9151	27.0548	26.9772	24.0182	25.2071	24.9632	24.7955	25.8587	25.582	25.471	NA	NA	25.1661	24.1747	NA	24.3522	NA	24.2829	24.1875	24.142	24.278	NA	24.0465	23.803	24.3505	24.9409	24.5088	25.2148	24.2581	24.6511	24.8193	24.8321
P06702	30.6752	29.925	27.7028	29.9619	26.4571	27.4772	28.4871	26.6221	28.5626	27.6847	26.974	29.3437	30.1526	30.0864	28.7623	27.9282	30.0548	29.4111	30.225	29.4946	28.9371	29.2144	30.2204	29.9469	29.2227	28.6587	27.7059	30.0429	28.7595	29.655	29.1432	29.9132	29.434	28.7552	27.4352	28.6546	27.7004	28.5266	28.6	28.7737	29.1585	27.6656	27.2248	27.3861	29.3618	28.3763	26.9936	28.22	27.4578
P06703;R4GN98	32.7107	32.7653	31.0366	32.1798	31.8023	31.01	31.8321	33.2071	31.3251	33.1341	32.8733	32.1928	26.9199	31.9441	31.4192	32.2973	31.1672	33.2259	33.1062	31.9035	33.0705	31.7142	30.9435	31.9781	33.3784	31.5204	31.6058	32.5004	32.3219	32.641	32.3611	32.0175	32.7081	32.8091	33.1082	31.8089	33.0085	31.7257	32.785	31.342	32.8132	31.948	32.6667	31.8117	31.3098	32.3461	31.3581	31.5361	31.8372
P06727	31.7099	32.2542	32.4158	31.8793	31.6133	30.7818	30.8065	30.643	32.2868	30.5775	31.7487	31.2872	32.1175	30.3994	31.6882	31.0383	31.0062	29.4632	32.6819	32.0387	30.9204	30.9173	30.3691	31.7312	32.7266	31.3065	32.1142	31.5355	31.3504	29.0237	29.9648	30.9564	30.9131	32.501	32.2029	31.6449	31.7962	31.1094	31.3096	31.0031	32.6825	30.4914	32.3564	30.4247	31.9849	31.566	31.6439	31.6974	31.0413
P06730;D6RBW1	25.5368	25.9073	26.1889	25.798	25.8061	25.4312	26.212	25.9903	26.2181	25.97	25.9259	25.9121	26.2064	25.4225	25.6792	25.6998	25.7027	26.1784	26.6393	26.1147	25.7335	26.1951	26.2196	24.8537	26.1104	26.2995	26.0606	NA	24.8501	26.1224	25.5759	NA	NA	NA	NA	NA	NA	NA	25.2473	25.0873	NA	25.5601	NA	25.724	25.5925	25.3318	25.82	25.5223	25.5944
P06732	NA	22.2921	NA	NA	20.2539	NA	NA	NA	NA	NA	21.9394	NA	20.4202	20.1707	NA	31.5748	22.5002	NA	NA	NA	NA	NA	NA	NA	NA	NA	NA	NA	NA	NA	NA	NA	NA	NA	NA	NA	NA	NA	NA	NA	NA	NA	NA	NA	NA	NA	NA	NA	NA
P06733;A0A2R8Y6G6	32.1608	31.7683	31.8537	32.2541	32.3544	31.9105	32.7866	32.3315	32.2476	32.7633	32.6282	32.6201	32.5252	32.6928	32.2953	32.4463	32.3542	32.7975	32.5438	32.677	32.5864	32.716	32.7982	32.8683	32.5649	32.6002	32.1402	32.4684	32.6933	32.9231	32.1518	32.331	32.4259	32.4176	32.4222	32.4934	32.0825	32.1079	32.5677	32.2884	31.3829	33.1071	32.6205	32.9753	32.7376	33.1469	32.9835	32.7001	32.7185
P06737;E9PK47	32.1378	31.1474	33.0293	31.8606	32.2637	31.0258	32.4287	32.2894	31.7633	32.8415	32.946	32.5897	32.7425	32.3415	32.4637	32.5815	31.5694	32.5147	31.2212	31.7105	32.0308	32.2413	30.9666	31.0803	31.3905	32.0126	31.9004	31.8067	32.6834	30.7853	30.6951	31.9514	32.1989	32.4175	32.9779	31.6709	32.0178	30.9229	32.2529	31.9275	32.1482	32.0794	32.2416	31.1548	31.7266	32.0885	31.756	31.6014	30.758
P06744;A0A0A0MTS2;A0A2U3TZU2;K7EQ48;A0A0J9YXP8;A0A2R8Y6C7;A0A0J9YYH3;A0A0J9YX90	32.3636	32.6177	32.3791	32.2673	32.3387	32.5693	32.4157	32.256	32.3648	32.9341	32.5096	32.5939	32.5058	32.9648	31.4738	32.0294	32.1176	31.824	31.5417	31.2679	31.2957	31.5418	30.5347	31.3079	31.2221	32.5195	32.7483	32.0026	31.8263	32.161	31.2144	31.999	32.498	31.2897	31.391	31.6599	32.8851	33.1218	32.7593	32.4638	32.1229	32.9078	31.612	32.2008	32.7941	32.7972	32.9931	32.5581	31.6556
P06748	27.3974	26.4847	26.7623	26.7457	27.0654	27.0959	27.4238	27.555	27.2236	27.6481	28.68	28.7261	28.1075	27.7386	27.7263	28.2288	27.8825	27.9494	27.0724	27.2801	27.9351	27.5785	27.8546	28.5288	27.8462	27.1284	26.5072	28.2678	27.9093	27.5486	27.6351	27.9699	27.9222	27.9649	27.209	28.3522	27.0568	26.7521	27.5853	27.8185	27.2889	28.1634	27.7178	29.1299	27.0561	28.3576	27.8484	27.8458	28.5462
P06756	27.9717	28.6731	28.144	28.0202	27.9582	28.2891	28.2481	27.6952	27.4724	27.7629	27.2714	27.9877	27.4782	28.1215	27.5978	27.518	27.5081	28.8447	28.585	28.5123	28.8395	28.5619	29.075	28.5997	27.608	28.1368	28.142	28.3803	28.0389	29.378	28.2135	27.8468	27.5855	28.4634	28.3886	28.3063	28.1761	28.1844	28.534	27.8413	27.8386	28.3774	28.5019	28.4648	27.6562	28.013	28.3954	28.2367	28.0227
P06858	24.0734	23.6564	23.6685	23.864	NA	23.7694	24.7908	24.0418	24.7927	NA	23.9248	NA	24.7842	24.0259	23.9996	23.999	24.1719	23.9156	24.2072	NA	23.941	NA	23.9098	23.971	24.2027	23.8959	23.542	NA	24.8818	24.0876	23.8812	NA	NA	NA	NA	NA	NA	NA	NA	NA	NA	NA	NA	NA	NA	NA	NA	NA	NA
P07099	32.1975	32.1398	32.3203	32.4686	32.3965	32.5737	32.2745	32.5732	32.3604	32.6407	32.9086	32.3875	32.6098	32.3166	32.1176	32.2728	32.5435	31.9161	31.3579	31.6414	32.2876	32.0004	31.5614	32.3068	32.3071	32.4839	32.4514	31.5719	32.405	31.6166	32.1219	31.8719	32.3083	31.9843	32.4056	32.2765	32.0433	32.3991	32.1906	32.6415	32.3498	32.6647	32.3776	31.7588	32.7242	32.8378	32.2803	32.2493	32.2517
P07108;B8ZWD1;A0A0A0MTI5	31.077	31.5334	31.5018	31.2685	31.516	30.5871	31.1286	31.2145	30.2216	31.4418	31.8078	31.2934	31.5524	30.8862	31.7306	31.7686	31.2539	31.0536	28.3111	28.3724	31.1923	29.8345	30.4796	30.9789	29.8566	31.191	30.5104	30.8348	31.9827	30.7093	30.7208	30.9654	30.9276	31.0862	31.4207	30.632	31.82	30.8096	31.653	31.2505	31.3518	31.1028	31.5733	30.4386	31.2858	30.8377	31.4393	30.7084	30.4484
P07195;A0A3B3IS95;A8MW50;C9J7H8	33.3618	33.1748	33.6571	33.4304	33.4219	33.0544	33.0669	33.0999	33.4761	33.4228	33.5684	32.7918	33.9084	34.0909	32.9267	33.0236	33.2578	32.5577	32.7701	32.5757	32.0068	32.5786	31.4155	32.2666	32.6136	33.1631	33.4138	32.8973	33.3595	31.8293	32.8337	32.9674	33.1011	32.9896	33.1398	33.4081	33.5993	33.3134	32.9212	33.2325	33.2333	33.0533	32.7091	31.8812	33.2911	33.9422	32.8762	32.7078	32.3404
P07237;H7BZ94	31.4832	31.7771	31.8455	32.0832	32.1066	32.1842	32.343	31.93	31.5221	31.4877	31.6622	31.976	31.8768	32.2956	31.5111	31.4425	31.6581	32.1292	31.0779	30.7552	31.8414	31.9868	32.1511	32.1802	31.631	31.9795	31.8137	31.7536	32.2829	32.8039	32.2389	31.6335	31.574	32.2098	32.202	32.3548	32.0694	32.5808	32.7052	32.2205	32.6524	31.0249	31.8485	30.8472	31.2927	31.7959	31.2169	31.5135	31.3328
P07305	28.9066	30.3449	28.5822	29.2662	29.7019	29.9766	29.4124	29.4905	28.6723	29.85	29.0724	29.6184	30.3797	29.7048	29.5389	30.4162	29.8654	29.3635	29.0338	28.4822	29.8217	29.5224	28.402	29.6891	28.8839	29.2446	29.4105	30.1209	29.8908	29.2732	30.2851	29.4485	30.486	30.9206	29.308	29.646	30.9942	31.1034	30.0814	31.3348	30.6535	30.0348	30.6878	31.2724	29.7249	30.0934	30.1561	31.0669	30.458
P07327	NA	NA	NA	NA	26.6197	24.134	24.2176	26.1286	26.1446	NA	NA	NA	NA	NA	NA	NA	NA	NA	NA	NA	NA	NA	NA	NA	NA	NA	NA	NA	NA	NA	NA	NA	NA	NA	NA	NA	NA	NA	NA	NA	NA	24.5655	24.9978	25.4522	NA	NA	25.8403	26.7038	23.5028
P07355;H0YN42;H0YMD0;H0YMU9;H0YM50;A6NMY6;H0YKS4	35.1812	35.4886	35.3212	35.2101	35.4517	35.0072	35.6865	35.5845	35.3907	35.7141	35.8644	35.4499	35.262	35.7613	34.8771	35.4778	35.5604	35.6979	35.7633	35.6114	36.0376	35.5264	35.5205	35.9929	35.9184	35.8738	35.6867	35.45	35.4704	35.4932	35.8816	35.9454	35.5828	35.3938	35.3776	35.2548	34.8505	35.2196	35.6211	35.181	34.6139	35.5604	35.6268	35.5828	35.3904	35.6221	34.7008	35.4212	35.143
P07357	26.93	27.4002	26.5197	27.3442	25.708	26.3756	25.111	27.0911	25.6069	26.6836	27.0604	25.4464	27.0505	25.6258	25.9355	26.7797	26.8266	25.6309	28.0925	28.0741	26.8609	26.731	25.971	26.6019	27.3593	27.2271	27.7123	26.9102	25.3666	25.3579	26.0364	27.6032	25.6426	26.9032	26.7071	26.8961	26.4553	26.0183	24.9792	26.8074	26.876	26.9159	26.9552	26.7004	27.8489	25.3444	26.5601	27.326	26.8203
P07358;F5GY80;F5H7G1	29.0239	29.7183	28.733	29.71	28.74	28.0991	27.9916	29.2416	27.5484	28.9514	29.5572	27.9338	29.2633	28.4976	28.5052	29.3238	29.5801	28.3295	30.4227	30.2963	28.858	28.8139	28.5617	28.8192	29.994	29.3544	29.919	29.0022	27.8848	27.6846	27.7559	30.0031	28.6379	28.9504	28.3763	29.5612	28.7037	28.4062	27.6899	28.816	29.1894	29.0008	29.494	28.922	29.8505	28.2356	28.328	29.6129	29.1616
P07360;Q5SQ08	25.6677	26.9365	25.5616	27.0333	26.006	26.0546	24.8295	26.9739	27.1951	25.8803	26.8993	24.5754	26.0761	24.9891	25.7859	26.541	25.7521	26.0907	28.5682	28.0274	26.0286	25.4185	25.7254	25.3073	28.1428	26.5066	27.3698	27.265	23.8259	NA	24.729	26.9427	25.1293	26.1943	25.1811	26.3951	NA	24.7009	25.5855	25.7863	26.7514	26.2001	25.9821	25.6055	27.0145	25.4933	25.3523	25.4825	25.7322
P07384	28.6686	28.3759	28.5491	27.8057	29.0675	28.4914	28.4819	28.6865	28.87	29.3474	29.008	28.6802	28.9624	28.4806	28.5149	28.6134	27.9742	28.4499	29.412	29.8161	28.4216	29.9433	29.2823	29.7463	29.6079	29.0547	29.0854	30.1637	28.7924	28.3498	28.6868	29.4771	29.1333	29.1841	28.6352	28.3048	28.6395	28.2214	28.4102	28.5663	29.1206	28.6627	28.1644	28.4628	28.5895	28.3643	28.0123	28.3732	28.3832
P07451	26.6637	27.1165	25.7591	26.5145	26.752	27.0162	25.6438	26.9777	27.3036	27.0475	26.1242	26.5411	26.7773	26.8582	27.7715	30.6607	29.4302	26.7806	29.1176	29.3432	26.6613	28.0448	26.2136	26.1634	29.3432	28.3153	29.007	28.8853	25.8292	26.7475	27.9543	29.061	26.6532	25.0319	NA	NA	NA	26.0807	NA	NA	NA	27.0745	26.7026	25.9911	28.3081	26.363	29.2933	29.6644	30.2746
P07585;F8VXZ8;F8VUF6;F8VWU0	33.7354	34.1386	33.5457	33.5799	34.0411	33.8659	33.3602	34.2208	34.3925	33.4524	33.7494	33.6117	33.5916	33.6633	33.4569	34.1587	34.1375	35.076	35.0846	33.8499	34.5067	34.7239	34.1824	34.6794	34.2139	33.4731	34.0901	35.2426	33.6878	33.3768	35.1183	33.8551	33.4031	34.1637	33.2157	33.4886	34.0935	33.7495	33.5418	34.2603	34.5479	33.8496	34.5601	33.8188	33.4737	34.2285	33.8043	34.7859	34.3253
P07686;Q5URX0;H0YA83;H0Y9B6	26.1422	26.3078	25.6432	25.9245	26.1056	26.2404	25.7191	26.2005	26.0233	24.8054	24.8276	25.5363	25.0413	25.9782	24.6552	25.5357	25.345	27.492	26.5975	26.4353	26.8391	25.0996	26.8046	25.5218	26.4055	25.7765	25.7185	26.0559	25.7738	27.9935	26.5285	NA	NA	NA	NA	23.8201	NA	25.0852	NA	NA	NA	25.3467	23.3657	23.9256	24.7111	25.1497	25.1324	25.3396	25.7829
P07737;K7EJ44	32.2684	32.1487	31.4776	32.1235	31.75	31.8841	32.7229	31.9043	31.8144	32.0483	32.0772	32.0394	31.9245	31.6336	32.3822	32.0272	31.9972	32.4031	30.4752	30.089	32.2506	31.7671	32.4808	32.2601	31.5742	31.7824	31.3061	31.2825	32.5128	32.6249	32.0089	31.6365	32.4012	31.5595	32.7478	32.5824	32.3667	32.2296	32.7515	33.188	32.5028	32.6216	32.7072	32.5316	31.7797	32.4877	31.98	32.3906	32.0414
P07738	28.8068	28.5892	28.3344	28.6265	28.7236	29.3556	27.1349	28.0952	29.8185	28.4905	27.2958	27.6087	28.2964	29.0189	27.6234	28.4368	29.8498	28.1413	32.4722	32.2589	28.6641	30.1477	29.3565	28.3016	31.219	31.2416	31.1342	31.53	26.5336	27.9643	29.0724	31.4438	29.1661	29.603	25.7328	28.0644	25.1953	27.5837	27.1712	23.8379	22.6874	29.3641	28.3804	28.7725	30.4289	28.8437	28.9899	28.2705	28.2873
P07741;H3BQZ9;H3BQB1;H3BQF1	28.3015	28.1491	28.2812	28.3509	28.3562	27.9491	28.5624	28.449	28.2419	28.7841	28.7429	28.7867	29.1906	28.4371	28.8897	28.3766	28.6181	28.6683	28.9154	28.9342	28.3967	28.8382	28.9975	28.8494	28.9199	28.4896	29.045	28.2834	28.789	28.2007	28.3638	28.258	29.4618	29.3998	29.1372	29.0657	29.3389	27.7644	28.8805	29.4609	27.5477	28.9791	29.0975	28.9347	28.6191	28.7814	29.6697	28.5082	28.6071
P07814;V9GYZ6	27.9582	28.0413	28.2673	27.7864	27.074	27.2826	28.033	27.8243	27.7941	28.2674	28.1166	28.1424	27.8596	28.0629	28.4357	27.8061	27.9064	28.5463	27.304	27.6867	28.2582	28.1221	28.3997	28.153	27.4277	28.0242	27.6603	26.5472	27.9597	28.1568	27.6514	27.1659	28.2415	27.7955	27.9658	27.0782	27.3495	27.1629	27.9868	27.7379	27.7337	27.0605	27.5988	27.7675	27.5865	27.3672	27.2281	26.9659	25.614
P07858	27.3964	28.2233	27.6639	27.8408	26.6991	26.6332	27.4412	26.9257	26.8181	27.0965	27.0234	27.3371	26.9717	27.1794	27.6448	27.0827	26.7336	28.5903	27.7581	28.7124	28.5474	27.6994	29.8557	28.6816	28.9519	27.2108	27.0054	27.1502	27.921	29.4663	27.1371	25.5629	27.4185	27.2471	27.4705	27.7153	27.2392	25.9897	27.8929	27.1581	27.4535	27.4225	26.2283	27.2082	26.2729	26.6943	27.3289	NA	27.3574
P07900	32.792	32.7826	32.8303	32.6349	32.7917	32.4593	33.1018	32.6045	32.7557	33.0023	32.8574	32.9174	32.9406	33.0282	33.1329	32.9922	32.9376	32.4005	32.2134	32.4866	32.0657	32.1343	32.293	32.2758	32.5998	32.1132	32.1501	32.2476	32.4114	32.3967	32.1584	32.2962	32.6866	32.7222	32.8687	32.7269	32.7158	32.0338	32.8584	32.6295	32.394	32.6363	32.9517	32.6104	32.6203	32.5945	32.7458	32.928	32.9372
P07902;G3V3U5;G3V223;F2Z2X9;G3V4G9	24.6704	NA	23.8176	24.5785	24.4347	24.6708	24.1103	24.0967	24.4912	24.806	24.5461	23.9211	24.3577	24.1643	24.6943	24.1911	24.4317	NA	NA	24.3884	NA	24.0383	23.8543	23.9915	23.6455	23.8375	24.1273	NA	24.6161	24.2929	24.8201	24.8644	NA	24.8842	NA	NA	NA	25.2505	24.635	NA	NA	25.2033	24.7643	NA	24.6684	25.5043	25.2595	25.1165	24.98
P07919	25.1494	25.4211	26.9222	25.5269	24.8811	24.7061	NA	25.0249	25.2791	25.7803	26.6743	25.2977	27.5256	NA	26.0037	25.7878	25.3718	27.1113	24.7302	24.9072	27.2317	24.6083	24.2554	25.1181	23.9929	25.043	25.7542	NA	28.0384	26.0816	26.5282	NA	26.8667	26.091	26.6283	25.5256	26.5775	24.9441	26.1913	26.6798	NA	25.2796	NA	24.2233	24.5107	24.582	25.0131	24.6427	24.7642
P07948;H0Y3C5;J3KPD6;F6SF04;P08631	23.9975	24.195	24.7458	24.6962	23.9371	24.2612	24.0519	24.0841	24.019	23.9851	22.89	23.3673	NA	23.5827	23.4751	24.0714	24.3712	23.5319	23.79	24.4121	23.85	24.2657	23.9824	24.6074	NA	24.0155	NA	NA	24.0952	23.7648	24.7565	NA	NA	NA	NA	NA	NA	NA	NA	NA	NA	NA	NA	NA	NA	NA	NA	NA	NA
P07954	27.9825	28.4949	28.3392	28.6673	28.5524	28.4953	28.2403	27.9737	28.5502	28.925	28.8001	28.526	28.8817	28.2828	28.9491	28.8441	28.9926	28.458	28.7961	29.0207	28.6296	28.7244	28.5226	28.3925	29.2018	29.1247	29.1645	28.5769	28.8687	28.6357	29.1833	28.73	28.3318	28.382	28.1799	28.769	28.3176	28.6294	28.4634	27.9285	28.3103	29.1286	28.7744	28.7025	29.3225	28.9245	29.3731	28.994	29.3095
P08133;E7EMC6	33.7338	32.9354	33.8337	33.5122	33.5576	33.0664	33.6854	34.3253	32.2236	33.8285	33.4838	33.4118	33.4381	33.821	33.8305	33.6021	33.5401	33.5766	32.8618	32.7922	33.6185	33.196	32.6948	33.2236	33.5605	33.3479	33.5437	33.3754	33.7472	32.795	33.4716	33.6237	33.6178	33.3369	33.5641	33.0451	33.638	33.1225	33.5209	33.6247	34.051	32.7445	32.7869	32.9496	33.2586	32.9871	32.8289	32.8069	32.7314
P08185	28.5822	28.6351	28.1229	28.4114	28.5299	27.6249	26.6	27.2117	25.3508	28.4867	28.8374	28.1459	28.4307	28.0566	28.1223	29.5628	29.453	27.1932	28.5874	28.6914	28.006	28.0872	27.5831	28.4199	29.0501	28.7893	29.293	28.8949	27.0175	26.9963	26.2862	29.6234	28.1402	28.9811	28.4627	29.1741	29.2611	28.8174	27.0448	28.101	28.955	29.2604	29.4751	29.1659	29.1786	28.7194	28.6165	30.2077	29.9649
P08236	25.0196	24.7192	NA	24.7519	23.8067	25.2591	24.3936	23.8021	24.7744	25.1867	24.7403	24.9552	24.1522	24.5564	24.9814	24.8501	24.1731	25.9632	NA	NA	25.5876	24.6131	25.6757	25.3962	23.8863	25.3386	24.5265	25.4596	24.8041	26.5558	25.954	24.5655	24.4577	23.4405	23.381	24.18	24.7714	24.8356	24.165	24.8817	24.6785	24.3217	24.3581	25.0798	24.2878	24.7245	24.7224	24.6408	23.4646
P08238	30.9788	30.805	31.1531	30.4848	30.6783	29.9045	31.212	30.6116	30.6824	31.2588	31.2238	31.3388	31.3386	31.1787	31.564	31.3679	31.5153	30.6919	30.6308	30.9354	30.355	30.7064	30.7162	30.7028	30.759	30.1761	30.3607	30.8328	30.6741	30.7272	30.1498	30.4999	30.9553	31.3089	31.0172	30.1764	30.5276	29.8827	30.8744	30.7555	30.442	30.9308	31.4029	31.0343	30.8321	30.4548	31.2084	31.0656	31.269
P08246	28.7118	25.5603	NA	28.0864	25.9987	27.092	25.907	24.7945	28.3899	NA	24.1565	24.7543	28.157	28.3449	25.3843	24.7444	27.0496	25.6214	28.2293	27.8984	NA	26.9398	NA	25.267	26.8623	25.9628	NA	27.9131	NA	NA	26.4123	26.7541	26.8314	NA	NA	25.0622	25.5248	26.6529	NA	NA	27.8331	24.7617	25.5938	26.4609	29.6419	28.9867	27.6015	27.2388	NA
P08253;H3BV48;H3BR66	NA	NA	NA	NA	NA	NA	NA	NA	NA	NA	NA	NA	NA	NA	NA	NA	NA	25.4329	25.1201	24.7873	25.0248	23.2831	24.0643	23.5861	24.1641	NA	NA	NA	NA	NA	25.8294	NA	NA	NA	NA	NA	NA	NA	NA	NA	NA	NA	NA	NA	NA	NA	NA	NA	NA
P08294	30.3185	29.9263	30.0156	30.4024	31.0919	29.7425	28.8765	30.2129	30.1061	29.3345	29.6727	30.453	29.6752	30.3192	29.9784	30.7235	30.4569	30.341	31.5257	30.4836	31.0282	30.781	29.7359	31.1549	31.2732	31.3178	31.4263	32.5003	31.1411	29.2398	31.4542	31.2831	30.4473	30.3668	29.4225	30.0526	30.533	29.4947	29.0454	29.4994	27.9559	29.9994	30.2006	30.3703	30.1366	30.3693	30.0641	29.5485	30.2449
P08311	28.1433	29.1456	25.4603	29.1448	28.8436	29.9572	27.1523	29.0213	28.7901	28.0879	27.7041	27.1797	27.6137	28.8334	27.8868	28.4511	29.245	28.026	29.2782	28.6274	29.5614	28.3775	28.7756	29.2351	28.8333	28.8957	29.3773	29.8392	28.1737	29.3469	29.15	28.6107	26.8027	25.6485	24.4061	28.8844	27.3002	29.4266	26.3792	27.4083	28.2492	28.9658	28.9566	29.4018	29.4064	29.1708	29.4456	29.4744	29.8854
P08473	22.0405	23.1817	23.5837	24.2971	NA	22.2816	21.5675	22.8865	21.8742	24.2899	25.1138	21.7728	25.3832	23.3442	26.2663	25.0214	23.8224	26.8843	24.314	24.817	26.6071	24.9428	26.002	25.9282	24.1352	25.1422	24.9658	NA	27.0274	26.7733	25.9459	23.3416	NA	23.764	21.5081	NA	22.4388	23.5185	24.0077	23.851	24.0941	21.854	22.9244	NA	24.0439	21.5712	25.4162	22.3684	NA
P08514;A0A3B3IU79	25.1506	24.4306	22.3139	24.0331	23.208	23.4138	22.8706	21.4792	NA	22.9175	22.6187	22.7129	23.2339	24.1984	23.0801	23.7523	26.2408	23.1285	29.7417	28.4543	22.3556	26.1248	25.1555	22.4512	27.0434	26.5363	26.7926	27.3075	20.2777	22.182	26.2309	27.9169	24.4801	23.5346	22.2077	24.0108	22.4156	22.5551	22.5374	22.4791	23.0568	23.1549	22.3944	22.7375	28.3425	23.2228	26.1342	23.4646	23.7703
P08519	26.0348	24.8558	26.8963	28.0666	26.8458	26.9728	25.6143	26.855	27.0151	27.0238	25.9016	23.7077	NA	25.4473	23.3519	NA	24.1005	23.5666	25.677	30.3793	24.9714	NA	23.3308	23.812	NA	28.2563	26.982	25.7883	23.4253	24.7033	NA	NA	25.7365	NA	26.8476	28.6935	26.1195	27.1306	25.3812	26.2033	24.9682	28.2379	27.2283	26.2185	27.3733	27.608	26.4719	26.1081	26.0021
P08559	27.6197	28.1555	27.938	27.8724	27.8091	27.9093	27.3145	27.7061	28.0294	28.2421	28.189	27.8136	28.4726	27.98	28.7081	28.3932	28.3166	28.0873	27.7203	27.7602	27.9106	27.9838	27.7549	28.2488	28.6785	28.7582	28.5669	26.8715	28.6289	27.9492	28.9143	27.6088	28.1075	27.1163	27.3837	27.7001	27.8663	28.2516	27.7408	28.3797	27.9484	27.9924	27.9343	27.5733	28.826	28.1318	28.4139	28.0279	28.3632
P08567	NA	NA	NA	NA	NA	NA	NA	NA	NA	NA	NA	NA	NA	NA	NA	NA	NA	22.5796	24.4826	26.1239	23.4498	NA	26.1832	NA	NA	NA	NA	NA	22.364	25.5872	NA	NA	NA	23.2808	24.034	NA	NA	NA	23.3347	NA	NA	23.3027	23.2336	23.3665	25.5998	22.5438	22.62	NA	NA
P08571;D6RFL4	28.009	27.0026	27.427	27.4902	27.0004	27.3485	28.0643	27.7861	27.4797	25.8942	26.6218	26.564	26.2544	26.9079	27.4241	26.567	26.4545	27.4985	28.2608	28.1578	27.5662	27.1535	28.7393	28.3104	27.0475	26.13	26.6816	27.1034	26.6536	27.3804	27.0913	27.0407	26.0362	27.1956	27.3728	26.7549	25.7296	27.1658	28.0792	26.413	NA	27.2967	27.4125	27.2769	26.5605	27.578	27.6613	26.9541	26.9104
P08572	26.9076	26.7501	27.7383	26.8371	26.8593	26.7719	26.7672	30.0547	27.0177	26.2743	27.2516	27.5959	26.91	26.5168	26.7139	27.3225	27.7369	26.7159	26.6786	26.0824	26.7428	27.0217	25.841	26.2145	24.8537	27.2752	27.6349	27.0473	26.727	26.7194	27.2252	26.4376	27.1879	26.4468	27.2443	27.0829	26.1287	26.5681	27.1954	26.7688	27.7839	25.8531	27.4845	25.3074	27.5688	27.5239	26.5221	27.2254	25.2301
P08574	27.5076	26.8388	27.1893	27.133	28.3037	27.4779	27.127	27.7617	27.5016	27.9118	27.2659	27.6037	28.0939	26.9196	27.8352	27.8576	27.2984	27.4596	27.6352	28.1656	28.6529	27.4659	27.4606	27.574	28.9668	28.3378	27.2588	NA	28.6798	27.7883	28.445	26.8523	27.771	27.5493	27.1996	27.3891	26.5387	27.336	27.6116	27.3019	25.485	26.9018	24.7506	27.3543	NA	25.8486	28.1919	26.2644	27.5529
P08575;M3ZCP1;A0A075B788	26.7771	27.335	26.3019	27.3272	26.0865	26.5588	26.962	26.3383	26.1255	25.3789	25.5935	26.6244	24.5986	26.7972	26.406	25.5014	26.2345	26.86	27.0716	27.1537	26.9916	23.8554	28.2845	25.8977	23.6248	25.1381	26.2774	NA	24.8604	28.6248	26.0548	NA	25.2884	25.5283	25.4554	26.2539	25.5397	25.5392	26.8933	26.5239	23.6907	26.8809	25.7934	27.2142	25.617	26.3823	25.8558	25.5272	25.8281
P08582	25.0307	24.5046	24.3892	24.8225	24.4042	25.1245	24.817	24.1728	NA	23.4575	23.7667	24.1796	24.2159	24.72	24.757	24.6919	24.534	NA	NA	NA	NA	NA	NA	NA	NA	NA	NA	NA	NA	NA	NA	NA	NA	NA	24.5151	24.5244	24.7047	NA	NA	24.8747	24.9501	23.9601	24.5867	24.4496	NA	NA	NA	NA	24.7751
P08603	32.3777	32.9467	31.7327	32.4249	31.7067	31.9332	30.7513	31.3643	31.1135	32.346	32.7223	31.3389	32.1532	32.0302	31.5133	32.3622	33.1133	31.0644	33.6721	33.379	31.2216	32.1809	31.483	31.2736	32.3132	32.5895	32.9458	32.3003	30.4134	30.3832	30.395	32.5858	32.1407	32.989	31.5104	32.8554	32.1401	32.2639	31.1025	31.8822	32.0132	32.5931	33.2153	32.2631	33.2839	32.0898	32.064	32.6934	32.7689
P08621	25.11	NA	NA	24.9581	25.1474	25.6868	25.229	24.7179	NA	24.268	NA	24.294	24.1124	NA	24.4619	24.8503	25.313	NA	NA	NA	NA	NA	NA	NA	NA	NA	NA	NA	NA	NA	NA	NA	NA	NA	NA	NA	NA	NA	NA	NA	NA	NA	NA	NA	NA	NA	NA	NA	NA
P08648	26.2748	26.6645	26.0074	25.9328	26.2915	26.5092	25.6409	26.0641	26.3446	25.935	25.9877	25.1852	25.8662	26.2778	25.9407	26.2057	26.3709	26.5862	26.8274	26.5246	26.5341	26.836	26.823	26.2734	26.9335	25.9472	26.2941	26.8059	25.9736	27.1602	27.2337	26.038	25.9152	26.7644	26.3784	26.2253	26.7349	26.9628	26.0124	26.7401	26.8198	26.5833	26.5464	26.6094	26.1725	26.076	26.9992	27.1207	27.4147
P08670;B0YJC4	36.2293	37.2757	35.7841	37.094	36.9824	36.9813	36.9484	37.1281	36.5789	36.9618	36.7048	36.3602	36.6415	36.9103	36.4735	36.6298	36.8625	35.8403	37.2085	37.1571	37.1132	37.0023	36.7542	37.3475	37.0448	36.857	37.1667	37.6078	36.844	37.2993	37.0522	37.1981	36.8917	36.192	35.3939	36.858	36.4731	37.045	36.9427	36.6735	36.1233	34.3535	37.0703	36.664	36.7627	37.2948	36.566	36.8397	36.2768
P08697;A0A0G2JPA8;C9JMH6;A0A0J9YY65	29.1782	29.3195	29.0631	29.1711	29.1836	28.4447	27.4746	28.2422	27.4585	29.3306	29.5165	28.5644	29.7424	28.5928	29.0239	29.5254	29.2159	28.0546	29.9713	29.9637	28.5421	29.1291	28.0941	28.8925	29.558	29.3848	29.6285	29.4818	27.7858	27.6378	27.086	29.3804	28.8242	29.9448	29.0698	29.3249	29.4198	28.5012	28.0082	29.1707	29.6089	29.6332	30.0911	29.3565	29.7722	29.4636	29.3309	29.7171	29.4691
P08754	26.6928	27.0642	25.6946	26.9645	26.0936	26.4869	26.4881	26.7536	26.8128	26.3045	26.3086	25.8032	25.8736	26.6738	26.393	25.806	26.5748	25.9717	26.3707	26.3198	26.1552	27.0179	26.1702	26.771	26.9239	27.1072	26.7619	26.9842	25.9062	25.3672	27.0263	NA	26.259	26.0498	25.5063	26.4155	26.635	26.6063	26.2009	26.9874	26.2619	26.4133	25.6463	26.3537	26.154	25.9812	26.0656	26.8024	26.7509
P08758;D6RBL5;D6RBE9;E9PHT9	33.413	33.4018	33.671	33.7323	33.7336	32.9889	33.905	33.335	33.4854	34.1548	33.5195	33.3285	33.3346	33.9382	33.5861	33.5753	33.2871	33.6859	33.7021	33.4168	33.835	33.4695	33.5076	33.6918	33.5623	33.8406	33.4941	33.5364	33.8379	33.3138	33.7912	33.8935	33.3084	33.316	33.5893	33.5319	32.9356	33.2264	33.7884	33.2559	33.3913	33.741	33.1901	33.3101	32.8415	33.084	33.0573	33.2376	32.2896
P09012;M0QXK2;M0R221;M0R2B8;M0R268;M0R0G9;M0QZG7	25.679	25.7202	25.2796	24.9245	25.3581	25.7568	25.5246	25.4187	25.5304	25.5417	25.2396	25.8593	25.8857	25.516	25.7127	25.5902	25.3908	25.3511	24.7686	24.7072	24.8504	25.0198	25.4614	25.4326	NA	25.2644	25.7575	NA	25.7922	26.2068	25.8141	25.6194	26.3125	26.1392	25.5762	25.8233	25.6797	26.2667	25.4593	26.0785	26.052	25.183	26.3226	24.5259	24.4524	26.2183	25.7382	25.5831	26.3104
P09104;F5H0C8	26.2196	26.85	25.8348	26.2037	25.9476	27.2115	25.3148	26.6603	26.3192	NA	25.9017	25.6559	26.434	26.1931	26.377	26.6219	26.6239	25.8516	27.5343	28.3613	26.7319	27.979	26.5961	26.6789	27.8861	27.0874	26.4717	NA	26.6593	26.4644	26.733	26.9434	26.4095	27.2474	NA	26.4515	NA	27.4019	26.4613	27.6367	25.6105	26.8474	26.407	27.4744	27.4038	26.3458	27.4148	27.1786	27.6752
P09105	24.8707	NA	25.6338	24.8139	24.8009	25.3042	NA	NA	24.8254	NA	NA	25.1566	25.6159	24.0928	24.879	26.1337	26.3287	24.9185	NA	27.7651	25.2819	26.425	NA	24.7376	26.8988	25.3893	NA	26.9596	NA	24.627	26.1075	27.3388	24.9866	NA	25.2676	NA	25.6204	25.4721	NA	25.5392	26.0647	25.0175	24.0923	24.7093	25.5474	24.2892	26.1619	25.0307	24.8103
P09110;C9JDE9;H7C131;H0Y4D4	26.2377	24.8232	26.5495	26.1784	26.0517	25.9008	27.1574	25.8491	26.0707	26.6994	26.2803	26.916	26.8007	27.1586	26.6528	26.2986	25.3903	27.0902	25.9178	26.7345	27.0057	27.1742	27.435	26.9716	25.5148	26.8975	25.9753	26.1763	27.0971	26.9729	26.2123	24.9216	26.0627	26.3084	26.4221	26.1439	26.332	26.5502	27.435	26.2901	25.7385	26.1317	25.719	25.525	25.8119	26.1243	25.7664	25.4494	23.986
P09211;A8MX94	30.616	31.0302	30.8755	31.2336	31.3358	31.1581	31.1407	31.4382	31.6084	31.2267	31.678	31.4012	30.3421	30.8	30.6586	31.3715	30.5991	31.1904	31.2143	31.4122	31.457	31.351	31.4931	31.5306	31.7184	30.9655	31.1771	31.2248	30.9153	30.8164	31.3225	30.8059	29.2372	28.773	31.9533	31.9706	29.0612	30.1154	29.9281	26.503	26.7166	31.5393	29.7325	31.7158	31.9904	30.4131	31.1226	30.3006	31.8971
P09382	33.4417	33.8504	34.328	33.4046	33.2065	32.7591	33.2008	33.8008	32.8852	33.5438	33.3249	33.8074	32.1191	33.4194	33.6261	33.3905	33.2858	33.8846	32.3659	32.1477	33.7307	33.5894	33.1158	33.9696	33.1748	33.8372	33.1481	33.8729	32.9888	33.4545	33.4853	33.192	33.6047	32.9397	33.9766	33.307	33.9377	33.3064	33.9384	34.0001	34.3293	32.2664	32.9955	32.1465	31.4384	32.7922	32.4144	33.0436	32.3045
P09417;B7Z415;D6RGG7	29.236	29.4972	29.8838	29.8753	30.0154	29.8301	29.9073	29.7929	30.1629	29.6315	29.5955	29.3263	30.0954	30.2201	29.863	29.8133	30.1039	29.171	28.966	28.2984	28.565	28.7933	27.7292	28.7795	28.977	29.1444	29.5681	27.6882	29.7315	27.9644	29.1601	29.0891	29.1077	27.2337	27.906	29.1056	29.5777	29.11	28.6687	28.1232	28.3568	29.2982	29.6745	28.5108	29.7753	29.8217	29.2483	28.9659	29.0217
P09429;Q5T7C4;B2RPK0	29.2084	28.8809	29.0985	28.5186	29.4807	28.6359	29.0105	29.3856	29.5307	28.3073	29.0658	29.2914	28.3347	28.7812	29.5476	29.678	29.0677	29.3091	27.737	28.5924	29.76	27.9064	28.3252	28.9767	28.9024	28.5029	28.0791	27.8619	28.9698	29.2132	28.4101	26.7976	29.4291	28.9363	28.8612	28.7256	27.0113	28.3781	28.6596	27.2954	26.7925	29.9031	30.0371	29.9577	29.2928	29.9818	29.5733	28.8316	29.8835
P09467;A0A3B3IUC7	28.3731	24.5315	25.5887	26.2774	26.219	25.2645	25.585	25.4412	25.0697	26.9698	25.8403	26.5372	25.7305	26.4383	25.9574	24.988	24.929	28.5421	22.6078	27.7323	27.1573	23.4003	28.6989	25.958	23.9193	27.2771	24.3204	26.7475	25.7352	28.6164	25.4102	22.9012	25.7121	26.1422	26.6718	24.2203	NA	25.8086	22.4913	27.1226	24.7953	27.665	26.6103	27.7615	26.2942	26.4876	27.1261	27.9888	25.9272
P09486;F5GY03;E5RK62	25.9974	25.8229	24.2814	25.9989	25.441	26.0551	26.5543	26.5121	25.79	26.272	26.3166	26.6036	26.9641	26.4481	26.0028	26.6553	26.8739	28.1897	27.6812	26.6086	28.1372	27.9334	27.407	28.429	27.7853	27.185	25.9508	27.5245	27.6455	27.457	26.4041	27.7452	27.1882	27.2077	26.3855	26.5969	24.6818	26.4185	27.3563	26.2693	25.2222	25.8895	25.9972	25.6142	27.4279	26.7086	26.1024	26.5659	26.6311
P09488;E7EWW9;B9ZVX7	28.3768	28.5738	28.0479	24.8797	28.2212	30.3211	29.8295	28.6804	NA	24.4161	28.4796	28.3554	22.53	23.5198	NA	NA	NA	29.3221	28.1936	27.8984	25.4554	29.9572	28.5924	29.3544	NA	23.7599	27.9443	25.9127	23.5292	NA	NA	NA	25.7942	25.9942	27.8448	23.8529	25.3002	29.3427	29.1445	27.0699	NA	23.9251	27.4178	27.3415	23.7489	23.6847	NA	NA	23.4274
P09496;F8WF69;C9J8P9	27.5175	27.5215	27.7232	26.6894	26.5109	26.2516	27.1083	27.145	26.5196	27.1112	27.4716	27.4587	27.6021	27.7951	27.3007	27.1587	27.558	26.9613	26.4698	26.6778	27.0812	26.1944	27.2863	26.7507	26.3713	26.6162	26.8992	26.9422	26.8767	27.5781	27.0489	27.0007	27.541	27.5856	26.9945	26.6715	27.455	27.6057	27.3766	26.8588	27.3432	24.9005	27.6579	26.1243	26.2825	25.9225	25.7489	26.9444	25.6036
P09497	27.6097	27.0957	27.3092	27.277	26.9507	26.293	25.7291	25.7571	25.3098	26.7757	26.6982	26.8341	27.4206	26.4891	26.1485	26.3985	26.3304	24.47	25.9937	25.2621	26.7164	25.5725	NA	NA	26.591	26.4547	26.8085	26.2853	27.6614	26.3204	26.1488	26.3905	27.5316	25.7024	25.5535	25.3856	25.9866	27.3168	26.4092	26.0225	NA	25.0041	27.2232	26.0794	26.219	26.0893	26.3181	25.9833	26.0527
P09525;Q6P452	29.0241	29.7795	28.8982	29.1118	29.1531	29.3065	28.761	28.983	28.7157	29.2885	29.2094	29.2443	28.9678	29.6793	29.0211	29.2635	29.2413	29.7424	30.2673	29.7874	29.2988	29.4377	29.5978	29.5667	29.0192	29.1046	29.4194	29.2089	28.7239	29.4685	30.4661	29.5949	29.5201	29.2954	28.9756	29.2372	28.3872	29.5492	29.0598	28.9672	28.9997	29.5884	29.5183	30.103	29.5917	29.3664	29.273	29.5846	30.0516
P09543	27.9857	28.2438	28.365	28.2489	27.9126	28.3453	27.7807	27.8864	27.5803	27.998	28.0448	28.6118	27.7374	28.1194	27.85	27.9662	28.3351	27.9527	27.8453	28.2335	27.9074	28.4728	27.4803	28.2418	27.7381	28.4083	28.3233	27.8461	28.3722	27.7901	28.1175	27.6093	28.2093	27.5004	27.3268	28.059	27.7404	28.1562	27.7517	27.9286	27.4001	27.971	27.5719	28.0185	28.0814	28.4149	28.2185	27.7227	27.9879
P09601;B1AHA8	24.4086	24.3993	25.7393	24.5394	24.173	23.8653	24.4332	NA	23.7513	24.5361	24.3451	24.5398	24.6112	24.3704	23.29	22.5863	NA	25.6589	NA	24.8612	26.2677	24.2506	25.3457	25.2272	24.8848	NA	NA	NA	25.5287	24.7892	NA	NA	24.6072	24.5639	24.636	24.9862	NA	24.4821	25.9487	NA	NA	24.3323	NA	24.2122	23.7449	23.3052	22.6054	24.1588	23.9399
P09619	27.7777	28.21	27.7483	27.5188	27.7547	28.0176	27.5374	27.2177	27.1706	27.3699	26.821	27.6132	26.9297	27.7472	27.5225	27.1305	27.1635	27.4617	27.8007	27.3626	27.165	27.6121	27.3739	27.3528	27.5673	27.2988	26.6449	28.0216	27.278	27.2341	28.6173	27.6119	27.6295	27.846	27.6757	26.9577	27.7145	27.9455	27.4986	27.5298	27.4763	27.942	27.6133	28.4795	26.7792	27.6221	27.8526	27.4816	28.0393
P09622;E9PEX6	29.2862	29.0082	29.6357	29.4969	28.9226	29.7054	29.1866	29.3759	29.4718	29.5346	29.2998	29.0397	29.5871	29.3627	29.5867	28.9556	29.0668	29.0155	28.5047	28.6217	28.2188	28.9165	28.1857	28.6356	28.2003	29.5834	29.2976	29.7055	29.2833	29.3623	29.6923	29.5858	29.7537	28.4013	28.1822	28.5431	29.3625	29.6216	29.2263	29.2292	28.7969	29.5665	28.3678	28.4234	29.5352	29.5902	30.6071	29.8589	29.0958
P09661;H0YKK0;H0YMA0	23.8362	24.7673	NA	24.5492	24.1884	24.6987	23.0642	24.0302	NA	23.8457	23.6682	24.0094	23.8139	24.521	24.4728	24.4483	NA	23.7457	24.6645	24.7297	24.6217	NA	24.8483	24.4066	NA	24.6881	24.5122	NA	24.6569	25.1261	24.6185	NA	NA	NA	NA	NA	NA	23.6027	NA	NA	23.9454	24.5387	23.8086	23.9116	NA	NA	23.3323	NA	24.5509
P09669	27.9569	27.798	29.2451	28.1591	28.338	27.8749	28.3561	28.9027	28.3418	28.2328	28.7124	28.3984	28.5262	27.2741	29.3015	28.0059	27.6828	27.8454	NA	NA	28.2617	26.3906	26.5859	26.5058	25.7064	26.0068	NA	27.7557	28.7383	27.2995	27.4224	NA	28.8877	27.3887	28.442	25.1978	28.1203	NA	28.3958	28.7383	27.6152	27.3851	28.0811	26.4627	26.8715	27.2933	26.7234	26.4139	26.65
P09874	24.1682	25.7348	24.5587	25.3563	24.9191	25.3869	25.4516	25.6115	25.5841	24.5626	24.2674	25.2915	24.4884	24.7122	25.0704	24.7774	24.6798	25.0476	24.8073	NA	25.6265	NA	NA	24.2993	23.9357	NA	NA	NA	24.4613	25.8333	25.9693	NA	23.3014	NA	25.4755	24.8656	NA	25.6258	25.1646	24.1557	24.3508	25.4346	24.9072	26.2198	25.433	24.3909	25.1103	25.5775	24.1744
P09917	23.3995	22.8223	21.9745	22.3556	22.2775	22.3424	22.8055	NA	NA	NA	NA	NA	NA	NA	21.7033	NA	NA	NA	NA	NA	NA	NA	NA	NA	NA	NA	NA	NA	NA	NA	NA	NA	NA	NA	NA	NA	NA	NA	NA	NA	NA	NA	NA	NA	NA	NA	NA	NA	NA
P09936;D6RE83;D6R956;D6R974	30.5541	30.5268	30.9375	30.5291	29.9939	30.3391	31.1602	29.6813	30.1472	29.6339	29.6271	30.0918	28.9924	30.4751	28.0539	28.4665	28.9407	30.8385	29.9041	29.7473	30.4917	30.4581	29.7609	29.6572	29.0391	29.3769	29.3936	28.4575	29.645	29.6934	26.9368	26.4576	29.6914	28.5752	29.1165	29.212	28.9575	29.8929	29.9007	29.1531	29.3869	28.7017	29.1097	27.8436	26.9401	29.9682	27.3891	27.8356	27.9472
P09960	29.0697	28.8101	28.8721	29.1295	28.415	29.3157	28.5935	29.2686	28.7795	28.7065	28.6094	28.5917	28.3428	28.7293	28.362	28.6987	28.7121	28.5304	28.5801	28.9966	28.4562	28.8094	28.884	28.4393	28.7461	28.5869	28.7491	26.743	28.6046	28.8418	29.0057	28.3191	28.5396	28.2926	28.4135	28.5018	28.012	28.8987	28.6213	28.5381	29.1456	28.5574	28.7095	29.3107	28.9409	28.7215	28.5553	29.0832	29.5535
P09972;A8MVZ9;J3KSV6;J3QKP5;C9J8F3	29.3563	29.1486	29.3032	29.9398	29.8481	29.1177	29.0334	29.2322	29.2593	30.6657	29.4872	28.7205	30.4475	29.5248	30.166	29.5366	29.8232	31.0354	29.8622	29.7184	30.48	31.0005	29.2188	30.8746	30.1749	31.6487	31.792	29.6078	31.7746	29.471	31.9274	31.1766	29.7458	29.3851	29.5707	29.9257	29.9141	29.6087	29.3262	29.7886	28.9498	29.9363	29.6974	28.827	30.8957	29.7184	30.5637	29.6022	29.0136
P0C0L4	27.218	28.4392	27.335	28.1316	27.6871	26.7757	25.4357	28.3035	27.9	28.6427	29.2264	27.2504	28.4526	26.7924	27.2571	28.3873	28.5498	NA	29.294	29.1148	26.1526	26.3771	27.0241	28.4387	28.4667	28.6041	28.4567	27.2725	26.0173	25.7542	25.6736	29.08	26.613	27.8038	27.908	28.0696	26.865	25.881	25.4809	27.3182	27.8794	28.545	29.5597	28.2383	29.0159	27.4028	27.3684	28.591	28.2516
P0C0L5;F5GXS0;A0A3B3ISA6	32.5353	33.1137	31.7613	32.7175	32.1633	32.1693	30.7497	32.6744	32.603	32.6018	32.6403	30.8587	32.5645	31.847	32.4662	32.5712	32.907	31.457	34.2369	34.0377	31.9098	32.4505	31.6829	32.2943	33.3395	33.1834	33.2478	33.2637	30.7544	31.357	31.1179	33.5151	32.2296	33.1117	32.1026	32.8967	31.9382	32.1291	30.8919	32.447	32.5093	33.0648	33.4961	32.3636	33.5495	32.3432	32.8798	32.8153	32.5552
P0C7P0	25.1829	25.1015	25.3633	25.0895	24.4143	24.7827	25.4556	23.985	NA	25.2794	24.9299	24.9926	NA	25.2978	26.5205	NA	25.1976	NA	NA	NA	NA	NA	NA	NA	NA	NA	NA	NA	NA	NA	NA	NA	25.1832	NA	25.1614	25.0246	25.0037	NA	25.192	25.5801	24.8194	24.5585	24.8	24.7212	24.4635	24.319	25.0743	24.3276	24.2529
P0DJI8;E9PQD6	28.6438	26.8532	27.7629	28.9018	26.4785	28.9573	28.2335	29.1405	28.5606	27.6949	28.6702	26.958	29.632	29.6369	27.3269	29.5117	29.4784	27.4663	NA	NA	28.6516	28.9008	27.3219	29.5229	28.8747	28.628	NA	NA	29.8006	25.2299	25.8614	29.0712	28.7067	29.7136	27.2817	29.3393	NA	28.6102	28.5006	29.185	29.1208	25.901	27.9691	NA	27.7531	28.6779	NA	27.8443	27.4705
P0DMN0;P0DMM9;A0A0A6YYL2	26.9495	26.8203	27.4369	27.3006	27.1687	27.0091	27.802	27.0275	27.5489	28.3176	28.4188	28.5302	28.2674	27.8913	27.2567	27.9634	27.8834	27.7381	27.7389	27.9072	28.3827	27.4751	28.1054	27.3318	26.3757	27.2732	27.7018	27.6617	27.5391	27.0698	26.0823	27.6384	26.9515	27.8205	28.3286	27.9548	27.4583	25.0943	28.2308	25.9136	26.3481	27.2192	28.4384	28.0783	27.6393	27.0068	26.8356	27.9073	27.4001
P0DN76;Q01081	22.5527	NA	21.5082	22.1531	NA	NA	22.703	NA	NA	22.7504	23.2474	23.1175	22.8544	22.4466	22.5477	21.9191	NA	NA	NA	NA	NA	NA	NA	NA	NA	NA	NA	NA	NA	NA	NA	NA	NA	NA	NA	NA	NA	NA	NA	NA	NA	NA	NA	NA	NA	NA	NA	NA	NA
P0DOY3	32.6738	33.0566	33.2147	31.835	32.1956	32.2047	31.7508	31.9514	31.5153	31.7979	32.2935	33.0821	33.0906	31.9677	31.0328	32.3824	33.2242	32.0144	33.8209	33.6952	30.5454	31.7468	32.0853	32.5937	31.5829	32.275	32.8952	34.1762	31.6765	30.4978	29.819	33.5128	31.4099	32.4754	31.8236	30.5266	31.4296	31.5642	30.5369	31.2019	31.5079	31.7907	33.0861	32.7386	33.1664	31.9369	30.5671	31.1403	32.3199
P0DP04;P01782	27.9134	27.1012	NA	26.5466	26.593	26.7456	NA	NA	25.9016	NA	24.9784	NA	NA	NA	NA	26.5432	27.1596	26.2649	28.4543	26.6341	25.7509	27.2787	NA	25.8958	26.0811	NA	25.6493	27.2077	25.0417	NA	NA	27.2979	NA	NA	NA	NA	NA	NA	NA	NA	NA	25.8437	26.6765	26.7965	26.7812	NA	NA	27.0557	26.2862
P0DP25;P0DP24;P0DP23;H0Y7A7;E7ETZ0;E7EMB3;Q96HY3;G3V361	30.6022	30.4117	30.156	30.613	30.9107	30.5528	30.8401	30.7696	31.9001	31.8881	32.1416	30.9507	31.7757	31.3299	31.1996	31.2845	31.2415	30.9427	30.9359	30.5187	31.233	31.3509	31.2089	31.3286	31.7407	31.5595	31.164	31.9415	31.5723	31.2873	31.188	31.5998	32.4392	32.0144	31.8072	32.1682	30.5791	31.4916	29.1432	30.8219	30.8605	31.7065	31.3344	31.3709	30.6927	31.943	31.9374	31.4434	31.6171
P0DPI2;A0A0B4J2D5;A0A096LPI6;A0A096LNH5;H7C1F6;H7C2G3;A0A0B4J2H4	27.9267	28.3784	28.4024	27.9742	28.7173	28.1123	28.5311	28.6495	28.9026	28.5809	28.7528	28.1519	29.022	28.4052	29.0971	28.7238	28.4985	28.2937	27.9123	27.7052	27.9406	27.3498	27.8713	27.8103	27.8735	28.2816	27.5999	28.0578	28.4049	26.8687	28.3168	27.534	27.2804	27.294	26.2342	26.785	27.7621	27.5357	27.7912	27.1173	28.9401	28.3963	28.3392	27.3945	28.6424	28.3891	28.8572	27.0394	28.375
P10155	25.365	26.216	24.4005	25.8962	26.429	25.5837	25.7127	25.5509	25.8022	26.141	26.0013	26.1032	25.1769	25.7483	25.152	25.6952	25.4608	26.2668	25.3743	24.7989	25.8929	25.6232	25.9446	26.3877	24.704	26.0902	26.0364	26.3565	26.0694	26.1571	24.9322	NA	25.7316	26.3065	26.2393	24.7005	26.0001	25.5786	26.0372	25.3627	25.9718	25.9123	25.7587	26.4138	26.6176	25.8915	26.3501	26.7552	26.5437
P10253	26.6925	26.5163	26.2455	26.4192	25.4761	26.2384	25.788	26.0291	26.2499	25.3659	25.8073	25.0816	25.1877	26.1135	25.4773	NA	26.1484	27.5574	25.8044	26.5774	26.2996	25.1919	26.9054	NA	24.4336	25.5236	25.0584	NA	25.5057	28.0448	25.8534	NA	24.9359	26.1865	25.7179	27.0393	27.0215	26.7509	25.7405	25.2631	25.8486	25.6455	26.3966	NA	NA	24.4577	22.6658	25.0758	24.9282
P10301	30.1549	29.8901	30.0268	30.3009	30.4514	30.2785	30.1223	30.8114	31.1899	31.057	31.1903	30.3856	30.3629	30.391	30.3154	30.895	30.2874	30.1523	29.6318	29.9665	30.2546	29.7873	29.4846	30.3823	30.4614	30.4503	30.5149	30.2471	30.2942	29.9013	30.2764	30.5795	30.3786	30.5032	31.0597	30.9122	30.7481	30.4351	29.284	30.3054	31.3106	30.4692	30.4116	30.2119	30.3698	30.8331	30.2618	30.17	30.1714
P10412	32.2324	32.6548	32.5368	32.3396	32.0253	31.8479	32.1762	32.1971	31.3456	32.0828	32.2749	32.6563	32.4808	32.1638	31.8398	32.3166	32.5908	31.3515	31.2056	31.4468	32.1148	31.8251	31.8262	32.2597	31.6287	31.5195	31.9193	32.0662	31.9107	31.9047	30.9477	31.6758	33.6242	33.4268	33.1225	32.6736	33.4712	32.79	32.5713	33.4602	33.366	32.413	33.181	32.1895	31.8607	32.8221	33.144	32.7378	32.0553
P10515;H0YDD4;E9PEJ4	27.2514	27.0665	27.0762	27.7157	27.2554	27.714	26.7209	28.1061	25.6361	27.363	27.1141	26.6951	27.1749	27.2551	28.6241	26.653	26.9425	27.8393	26.5755	26.5809	28.3373	27.8559	28.3375	27.5872	27.8161	27.0543	27.4234	NA	28.0355	27.4803	28.6812	25.1291	24.8214	26.2224	26.2706	26.6701	27.3414	26.8592	26.6014	27.0843	27.5046	26.9612	25.1845	26.091	27.3685	26.4983	27.4397	27.2335	26.9399
P10586;H0Y6Z7;H0Y4H1;H0Y7Z9	NA	NA	NA	24.2022	24.4301	24.3834	NA	24.8514	NA	24.1917	24.7118	24.7996	24.4566	24.5559	24.5522	25.0115	24.659	24.9034	NA	25.0114	25.0106	24.7819	24.4677	24.6362	24.9476	25.219	25.1106	NA	24.6975	24.8869	24.9889	24.8307	25.0386	24.752	24.1334	24.5784	24.7141	25.054	NA	25.2914	25.3055	24.9202	25.537	25.3695	25.1428	24.6525	25.4801	25.2083	25.7005
P10599	30.21	30.3438	31.1588	30.9521	30.3779	30.0563	30.714	29.8295	29.8502	30.3639	30.4171	30.5182	29.9548	29.4972	30.3367	30.3199	30.2983	29.9095	29.6759	29.939	30.0454	30.7804	30.2656	30.5362	30.5609	30.4179	30.4253	30.3974	30.1311	29.3738	29.6996	30.3048	29.959	30.0937	30.3617	29.6038	30.0876	29.8212	30.0248	29.7247	30.0793	28.6494	29.0995	29.3359	29.0892	28.6078	29.3001	29.0097	28.3244
P10606	28.9834	29.2597	28.4248	28.4766	29.1381	29.1095	29.5686	29.294	28.3702	29.193	29.2516	29.4699	29.2088	29.0285	30.1333	29.6244	28.8878	29.1711	NA	NA	28.9216	28.8044	28.7418	29.3856	28.1463	28.5311	27.9538	28.4833	30.3116	28.9796	29.3307	28.762	29.3095	28.5446	29.4844	28.9013	29.4929	29.0416	29.5609	30.0666	29.3033	29.3122	29.2877	28.4534	28.4778	28.9272	29.2159	29.3705	28.9337
P10620;F5H7F6;F5H6X2	31.7367	31.5453	31.6448	32.7062	31.47	31.9063	31.5676	31.2959	31.5956	32.1855	32.2845	32.0962	31.9641	31.7415	31.3811	31.7931	31.9956	31.5502	31.2162	31.1631	32.1775	31.4833	31.4753	32.1119	31.9048	31.8858	31.7204	31.7853	32.887	31.0661	31.9878	31.9678	31.869	32.3052	32.4572	32.729	31.8607	31.5114	30.2717	31.3078	30.9975	31.822	31.3136	30.831	31.9798	32.0829	31.8584	31.7071	32.0544
P10643	28.9652	29.8676	28.6817	29.2428	28.6647	29.062	26.622	28.0841	28.265	28.5083	29.1261	28.2201	28.5264	27.8377	29.5295	27.4358	28.9541	27.7023	30.4006	30.4329	27.6523	28.7184	27.2354	26.8797	28.4147	28.3548	28.491	28.6752	24.3812	26.7503	27.4514	28.1575	28.9212	29.7636	28.8773	29.3724	28.5707	29.1503	26.5793	28.2356	28.3802	28.9624	30.0586	30.0195	28.9995	28.9958	29.6043	28.6406	29.8417
P10644;K7EPB2	25.8278	23.9249	24.9392	26.2557	26.1826	25.9879	26.7085	26.1776	26.0475	26.0998	25.9562	26.2933	25.9374	26.1165	25.9356	25.9116	25.9658	27.1922	27.4347	26.7142	27.1394	26.7063	28.0006	27.7215	25.8298	26.668	25.4379	25.5459	26.2486	27.7739	26.4853	25.6975	25.4655	26.1078	24.8945	25.7651	24.5049	25.4845	25.4924	24.2101	NA	26.8364	26.0206	26.8389	25.7796	25.867	26.7173	26.2244	26.4266
P10768;X6RA14;H7BZT7	29.2977	29.1885	29.2	29.362	29.3861	29.4798	28.8509	29.386	29.0624	29.5442	29.5721	29.6013	28.9649	29.3927	29.0726	29.5884	29.5165	29.0347	30.2524	30.1193	29.5839	29.1157	28.7352	29.1	29.2157	28.5904	29.9351	29.5805	28.5619	28.4456	28.9548	28.8952	28.9082	29.4006	28.9666	29.374	29.8403	29.5801	29.3085	28.9676	28.1243	29.965	29.6944	29.8346	29.4396	30.1789	29.9977	29.988	29.7172
P10809	31.1913	30.1174	31.1468	30.4126	31.2216	30.8865	31.2138	30.4483	30.6681	31.1496	30.7525	31.1259	31.1371	31.0136	31.688	31.2872	30.9306	30.9193	29.7044	30.1041	30.6571	30.9011	31.2208	30.8816	30.5032	30.5119	30.2813	30.0784	31.3327	31.1417	30.9912	30.4518	30.9508	30.9555	31.0729	30.6708	31.2131	30.3984	31.317	31.083	31.4182	31.0749	30.9289	30.6136	30.6284	30.7032	31.2125	30.8153	31.1748
P10909;H0YLK8;H0YC35	29.1013	29.8123	28.9952	29.5092	29.116	28.791	28.1554	28.4012	29.2107	28.9847	29.8936	28.2787	29.8296	28.9333	29.3683	29.6214	30.2778	28.6664	31.0661	30.9701	28.7479	29.5424	28.6274	29.0196	30.5234	30.0823	29.9983	30.5209	28.0861	28.5851	28.714	30.9137	28.9686	29.6662	28.4958	28.7521	28.612	28.2336	28.2228	28.0347	28.6005	29.6332	29.8236	28.9633	30.1652	29.3015	29.9816	29.8824	29.2241
P11021	32.1624	31.5022	31.7318	30.8813	31.8073	31.7626	32.3337	31.8857	31.6991	31.9419	31.8677	32.0829	31.8853	31.9809	31.4109	31.3484	31.1449	31.0967	31.2118	31.0944	31.201	31.9989	32.2125	32.8856	31.439	31.5891	31.3838	31.5599	31.8691	32.2114	31.3953	31.2975	31.6755	32.031	31.8235	30.7316	31.491	31.7557	31.9719	31.7377	31.238	31.3912	31.4139	31.4543	31.2125	31.1332	31.5252	31.8055	32.164
P11047	32.6895	31.9116	33.0325	32.4778	32.9284	32.3602	32.2608	32.5974	32.8062	33.3144	33.2792	33.1526	33.0582	33.5352	32.6761	32.824	33.151	31.8471	31.2775	30.934	31.8277	31.6529	31.0598	31.3047	31.7374	32.7352	32.7831	32.7073	32.6555	32.2589	32.217	32.6329	32.8705	32.1762	33.1535	33.0519	33.2574	32.8428	32.7314	33.0003	33.4869	32.8483	32.8394	32.2285	33.1114	33.3643	32.3536	32.38	32.3453
P11117;E9PHY0;B7Z7D2;E9PQY3;E9PP23	23.8791	24.6231	23.2617	NA	23.7744	NA	23.5211	NA	23.7184	NA	NA	23.778	NA	23.7568	24.1019	NA	NA	24.5817	NA	23.6801	24.4902	NA	24.9916	23.5411	23.4452	NA	23.2645	NA	23.3404	25.1425	24.9187	NA	23.5666	NA	NA	NA	NA	NA	23.9221	23.7467	24.4187	23.2693	NA	23.2659	NA	NA	23.9609	23.3274	24.0734
P11142;E9PKE3;E9PNE6;A8K7Q2;E9PN89	32.4281	32.0812	32.4909	32.1962	31.9596	31.9695	32.5758	32.3374	31.4245	31.6967	31.3227	31.816	31.7105	32.4971	32.1856	32.0574	32.161	32.5234	32.2772	32.6794	32.3163	32.0526	32.2034	32.334	32.2123	31.684	31.5973	32.4566	32.1395	32.3094	31.9208	32.452	32.5513	32.143	32.1179	31.6727	32.1515	31.9292	32.4729	32.4639	32.5108	31.8908	31.9105	32.2305	32.1236	32.1344	32.3866	32.1661	32.4643
P11166	27.7714	27.6358	26.3834	27.6474	27.1085	27.6536	26.0518	25.603	27.6925	25.7516	25.8252	25.1932	26.5321	24.9268	24.5256	26.3863	27.6001	24.313	29.7732	29.9773	23.6646	26.8424	26.02	25.3085	27.9905	28.4896	29.3998	29.3286	23.808	26.2242	28.6109	29.7847	26.9599	28.0345	25.2687	26.4209	26.6366	26.5458	24.721	24.812	26.4741	27.5425	25.6623	26.5368	28.4633	26.0179	27.2038	27.2051	26.3012
P11172;E9PFD2	NA	NA	23.9905	23.6572	24.3264	24.1369	24.4333	23.7395	24.2049	23.6005	23.2876	23.8351	23.4837	23.7355	23.957	23.397	NA	23.973	24.2682	23.6869	24.0882	23.8992	24.0665	NA	NA	23.5293	23.9154	NA	24.0622	NA	23.1146	NA	23.585	NA	NA	NA	NA	NA	NA	NA	NA	23.1595	23.1506	24.1174	NA	NA	NA	23.7419	23.2414
P11177;C9J634	26.6635	27.1207	26.9906	27.1953	27.3447	27.5881	27.0923	27.3068	27.4904	27.8023	27.4173	27.2306	27.7026	27.513	28.2233	27.8272	27.4363	27.5421	27.3636	26.6386	27.7257	27.2464	27.4256	27.8998	27.399	27.9266	27.7325	26.6135	28.041	27.534	27.7867	27.1325	26.3532	26.8745	26.96	27.4888	27.0461	27.575	27.2589	27.2545	27.1401	27.4089	27.0019	26.8249	28.2268	27.0077	27.8737	27.9552	27.3069
P11182;Q5VVL7	24.0076	24.1306	24.0701	24.3198	25.4439	24.663	24.328	25.1203	24.5911	24.8016	24.1279	25.0415	24.3469	NA	25.4115	NA	NA	23.4982	NA	24.2653	24.5577	24.0377	24.4101	24.0157	23.5881	NA	NA	NA	24.2293	NA	24.4437	NA	23.2496	23.9995	24.472	24.2217	NA	23.8667	24.0315	NA	25.2241	24.3276	24.04	23.7705	23.9362	23.819	24.2426	23.6959	24.4983
P11215	26.971	26.1976	25.6396	26.7756	26.6171	26.2633	26.7711	26.7371	26.7773	25.9372	25.7301	25.4959	25.5756	26.5911	25.9156	25.5692	26.3074	27.1198	27.2798	27.5697	27.2918	26.1079	28.3434	26.844	26.7178	26.0543	25.6546	26.2048	25.2684	28.2144	25.8298	25.8632	25.9599	26.0557	26.1274	27.2238	26.3928	25.7137	26.9461	25.7549	25.3597	26.9466	26.6029	26.7141	26.9323	26.8027	26.4176	26.4706	26.5139
P11216	29.4601	28.4626	29.5537	28.9663	29.3604	28.7024	29.3099	29.2476	29.0923	30.0767	30.0379	29.6054	29.4778	29.4277	30.4062	30.2009	29.3165	30.1864	29.0166	29.4891	29.5946	29.917	29.3051	29.095	29.8053	29.4939	29.3548	29.0569	29.5008	28.8954	28.8074	29.9659	29.6041	29.2654	29.6392	28.9509	29.3214	28.5311	29.2556	29.0479	28.7882	29.3815	29.2149	29.0222	28.5878	28.8824	29.6003	28.5947	28.4384
P11217	25.0576	24.0919	24.8532	24.4943	25.4207	23.8291	25.1843	25.7097	22.6103	26.0268	26.5405	25.044	26.5527	25.017	27.0653	29.9504	25.8411	24.242	NA	NA	23.0421	24.812	NA	24.2948	22.8967	25.7226	25.4693	NA	26.2862	23.2136	24.6311	24.5778	25.5743	24.7768	24.2554	23.8786	24.9678	22.8774	24.2628	24.5134	24.1533	25.8784	26.4253	25.155	26.4977	25.7283	26.7489	26.7001	25.78
P11233;H7C3P7	27.3117	27.1059	27.4633	27.5404	28.0813	26.8481	27.1074	28.0547	27.9077	28.5666	28.6934	27.9004	28.4217	27.9126	27.8356	28.6186	28.2534	27.675	27.42	NA	27.7844	27.4863	26.7631	27.8125	28.3731	28.4357	28.7127	27.7005	28.6091	27.1308	26.9593	28.4159	27.263	26.8623	26.4296	26.3403	27.3686	26.6492	26.7835	26.3193	27.9598	28.0342	27.9965	27.5413	28.4959	27.7869	27.6965	27.5992	27.7063
P11234;C9J6B1;C9JQB3	27.5789	27.2074	27.7008	27.5821	28.059	27.1732	27.9298	27.9612	28.2166	27.5429	27.6473	27.711	27.2042	27.5393	27.3295	27.9231	27.8579	27.846	27.211	26.2529	27.3976	27.216	26.2982	25.4612	28.1995	27.3847	27.3278	26.7362	27.8912	25.7822	27.2422	27.5783	25.5195	25.1521	26.3216	25.2846	26.1466	25.9426	25.0556	27.1404	27.8682	26.5548	27.5674	26.5036	27.6088	27.6187	27.1756	27.1639	27.4058
P11277	31.1673	31.0457	30.2078	30.7709	29.9385	30.9271	29.9628	29.6065	31.4247	31.6206	30.9327	30.4979	31.2669	31.9255	29.9024	31.3025	32.4567	29.8832	34.3495	34.5237	30.5227	32.9432	31.4857	30.7229	33.0362	32.7999	33.6773	33.122	28.5903	30.6897	32.2304	33.6449	31.2881	31.7981	30.376	31.0775	29.9373	31.0378	30.2361	29.8085	31.8073	31.0835	31.2117	31.2842	33.0989	31.1974	30.7057	31.5349	30.3539
P11279	28.9682	29.1999	28.9059	28.9282	29.2016	29.5246	28.9732	29.0288	29.037	28.6688	28.2479	28.808	28.8364	28.7769	28.8283	28.8202	28.8917	29.1608	28.6824	29.4237	28.4379	28.2973	29.1562	28.3787	28.0385	28.3871	28.0383	28.779	28.1772	29.7874	29.2684	27.9933	28.4957	28.8996	29.1053	28.7562	28.9686	29.3232	28.5787	28.4647	27.5933	29.0976	28.8869	29.0533	27.7855	28.8191	29.4359	28.6791	28.7397
P11413;E7EUI8;E7EM57;E9PD92	29.333	29.3741	29.6705	29.4286	29.1117	29.1339	29.4618	28.8951	29.1948	29.2992	29.2384	29.0239	29.0464	29.4178	29.2774	28.4107	28.6188	28.6419	29.5387	30.0521	29.0853	29.2164	29.5586	29.2992	29.1371	28.7773	29.0618	29.4044	28.954	29.6992	29.3839	28.9434	28.4666	27.8229	29.1495	28.728	28.1729	28.6003	29.4762	28.1084	27.5602	29.2191	28.8018	28.7637	28.835	29.2634	28.7541	28.678	29.0777
P11498	29.5347	28.0689	30.3053	28.7819	29.0243	28.2912	30.0307	28.6738	28.1183	29.5518	29.5373	29.886	30.0911	29.3467	30.715	29.8195	29.4733	29.6683	28.5851	29.0917	28.6618	29.1058	29.0655	28.6364	25.488	29.0511	29.586	27.2133	29.8646	28.4504	29.2491	28.5611	29.89	28.924	29.9826	28.5456	29.3468	28.76	29.6715	28.669	27.6925	29.0447	28.7065	27.6748	29.6013	29.1894	29.957	29.3447	28.8107
P11532;E9PDN5;A0A075B6G3;A0A087WV90;A0A087WTU7	28.4677	29.0612	28.4855	28.9488	29.0738	29.2858	29.1518	29.2944	27.9878	29.544	29.31	29.573	28.8137	29.3317	28.9133	28.7938	29.7308	29.3957	28.5902	28.3667	29.6841	29.8614	28.704	29.6446	28.8967	30.5405	30.0998	27.1957	29.9209	29.5935	29.5218	29.7697	28.6301	27.8762	28.97	29.4407	29.284	29.0335	28.9599	28.5945	28.6432	29.1012	29.0933	29.2907	29.1365	29.5141	28.6659	28.796	28.4376
P11586;F5H2F4	30.3202	29.5645	30.8155	30.2515	30.568	29.1072	30.3912	30.4009	29.8671	31.2291	30.8587	30.7896	31.2318	30.699	31.5934	31.021	31.1072	30.4848	29.8828	30.088	30.3723	30.2415	29.406	29.5768	29.9585	30.1205	29.941	29.2495	31.0849	28.6647	29.8703	30.9331	30.8192	30.3514	30.8461	30.4303	30.8331	28.9545	30.3975	30.7135	30.123	30.1181	30.6778	29.4448	30.6911	30.5097	30.944	29.9473	29.9083
P11678	NA	NA	NA	NA	NA	NA	NA	NA	NA	NA	NA	NA	NA	NA	NA	NA	NA	NA	NA	NA	NA	NA	NA	NA	NA	NA	NA	NA	NA	NA	NA	NA	NA	24.7657	NA	NA	NA	NA	NA	NA	NA	NA	NA	20.9107	24.3412	22.4288	21.4114	24.6238	20.4356
P11717	26.7922	26.3567	26.4323	26.9265	26.3856	26.9703	26.5734	25.6224	26.0981	25.9761	25.759	25.8205	26.0799	26.6218	26.1749	25.9955	26.3823	26.5522	26.2638	26.3246	26.1632	25.3426	26.5101	25.5035	24.813	26.2672	26.2337	26.4609	25.6444	27.3345	26.0407	24.6694	26.5113	26.4211	26.856	26.8072	26.9454	27.0563	26.7823	26.4724	27.1606	25.9563	25.1586	26.561	26.1467	26.4157	26.5851	26.6128	26.0846
P11766;H0YAG8	30.4225	30.424	30.2234	30.6974	30.5603	29.7907	29.7991	29.9546	30.3175	29.4949	29.8971	30.0163	30.0075	29.7432	29.304	29.8791	29.7459	28.8677	28.7789	29.0194	28.8263	28.8026	28.3835	28.7483	29.0262	30.3926	29.935	30.4551	29.4574	29.3847	29.9943	30.2803	29.3661	29.5053	29.8857	29.9738	30.2098	29.4968	29.2731	29.8348	30.2842	30.6333	29.9668	30.5426	30.2376	30.33	30.745	30.1029	30.0931
P12004	NA	NA	24.2632	23.1588	NA	NA	NA	23.0879	NA	NA	23.6595	23.6425	NA	24.4027	23.3889	23.7343	24.3994	23.5088	NA	23.131	22.6879	22.8845	23.2646	NA	22.8356	NA	NA	NA	23.1002	23.1135	NA	NA	23.1455	NA	NA	NA	NA	23.1633	23.1723	NA	NA	23.6486	NA	23.9461	NA	23.856	23.2944	23.2436	23.147
P12081;B3KWE1;B4DDD8;B4E1C5;E7ETE2	26.3109	27.1814	26.8572	26.3693	26.5514	27.0286	26.6674	26.5686	26.912	25.9292	25.4384	26.2821	26.2778	26.6194	26.1218	26.1368	25.9206	26.5382	26.1773	26.4147	26.3347	26.747	26.5942	26.5931	26.5619	26.3879	26.2691	NA	26.3676	26.6369	26.9528	25.9744	26.2368	25.2119	26.0544	26.7043	25.8265	26.7025	25.7646	26.0831	26.1609	26.6655	26.656	25.7382	26.2394	26.24	26.3408	25.994	26.6438
P12110	31.4718	31.2713	31.0894	31.2422	31.6458	31.1873	31.085	32.3242	31.4548	31.1063	31.6215	31.4717	31.9129	31.4061	31.2024	32.5096	32.3938	31.5027	32.1528	31.1381	32.0042	31.948	31.3878	31.8104	31.3387	31.0026	32.3733	32.6676	31.8144	31.9884	33.0454	31.9296	31.257	31.4907	31.2628	31.6373	31.8726	31.5236	31.1093	31.9514	31.8731	30.5154	32.0043	31.6001	32.3294	32.7616	31.7828	33.3896	31.7366
P12111	33.8415	33.4867	33.7522	33.5625	33.965	33.516	33.5938	34.7593	33.8513	33.3622	33.9318	33.8682	34.1343	33.4821	33.4652	34.7332	34.5612	34.3329	34.9137	34.0391	34.6065	34.7607	34.2169	34.3976	34.217	33.4715	34.7127	35.1057	34.2152	34.3412	35.53	34.4096	33.3134	34.1907	33.7701	33.7651	34.2047	33.6301	33.7864	34.4198	34.3471	32.7678	34.3157	33.8458	34.2258	34.8393	33.9401	35.0048	33.9713
P12235;V9GYG0	26.6498	26.6899	26.0547	27.1678	26.9354	26.653	26.1695	26.471	26.4071	26.1968	25.7543	25.8563	26.0812	25.6614	26.3149	26.8064	25.8776	25.7974	25.7885	25.6485	25.7956	26.2684	25.2859	25.8903	27.2208	26.1688	25.723	28.6889	26.1492	25.7967	27.2953	27.8326	25.0164	26.0697	25.3494	25.906	25.7441	26.206	25.2549	25.4817	25.0738	26.5438	25.4086	26.3203	26.3937	25.4553	27.0999	26.1143	26.2704
P12236	30.6615	31.0742	30.8272	31.3028	31.0164	31.1622	30.7954	30.7255	31.0057	29.8741	29.8442	29.7974	30.2545	29.902	30.4149	30.2655	30.1631	29.9051	30.4158	30.6316	30.7258	31.2508	31.1436	30.5776	30.6955	30.6335	30.6467	29.8276	30.6688	30.5053	30.92	30.3599	29.9184	30.6244	29.6547	30.2054	30.379	30.4402	29.9855	29.4403	30.165	30.5184	29.8162	29.9437	30.5175	30.0317	30.836	30.0824	30.0444
P12270	27.7865	27.8388	27.4703	27.7886	27.8423	28.062	27.64	27.6907	27.741	27.7208	27.6181	27.8303	27.6178	27.8993	28.0183	27.8894	27.691	27.7978	27.2657	27.3462	27.5787	27.6891	27.6649	27.716	27.5681	27.6431	27.5144	27.9405	27.3261	27.7398	28.2487	27.3798	27.9092	27.2911	27.6028	27.9741	28.2318	28.2832	28.0334	27.9405	27.911	27.8493	28.5258	28.5281	27.6113	28.2512	27.3994	28.336	28.5552
P12277	27.9939	27.6994	28.0141	27.6536	28.7961	28.0415	27.5157	29.0745	29.2408	28.5814	28.8993	29.0485	28.9971	28.1767	29.4069	29.0485	28.7642	27.4728	27.8688	26.1076	27.5984	28.54	26.2718	28.7296	28.5282	27.6032	28.5714	28.9464	29.5036	26.7444	29.0091	29.3002	28.3392	27.9793	28.0815	26.9015	27.5627	27.1563	27.4241	28.2308	28.4112	28.4881	29.1141	30.1122	29.4398	27.6364	29.4124	29.3297	29.2856
P12429;D6RA82	27.9347	27.6799	28.0406	28.6692	28.2512	28.5379	26.9543	27.6965	28.7333	29.7216	29.5272	28.3416	29.3051	29.251	28.3486	29.0849	29.2549	26.6393	27.0975	26.8896	27.8796	27.9117	25.0993	26.7286	27.7286	29.1226	28.7689	27.4347	28.0436	27.7072	27.6338	28.8301	28.9767	25.9382	27.5332	28.7913	27.6717	28.5917	27.2515	27.7154	28.3271	30.0439	29.8242	29.1804	29.7587	29.222	29.4981	30.1044	30.4975
P12532;F8WCN3	25.6794	26.1496	25.8115	24.895	23.8815	25.9328	25.4461	NA	23.8199	24.9938	24.6422	25.5601	24.4469	27.037	23.9076	24.8475	26.2236	NA	NA	NA	NA	NA	NA	NA	NA	NA	NA	NA	NA	NA	NA	NA	25.3273	25.6166	23.3138	25.1559	23.1753	23.9	25.8677	NA	NA	24.469	25.3158	25.8647	26.035	26.4905	27.3854	27.3798	25.6675
P12814	32.5019	32.7195	32.3802	32.8076	32.753	32.9649	32.9633	32.5012	32.295	32.5515	32.3538	32.6599	32.111	32.9868	32.6523	32.4594	32.3488	32.7223	32.5291	32.5317	32.8034	32.7933	32.6874	32.6067	32.3237	32.5236	32.2417	32.8022	32.6885	32.9851	32.7017	32.5571	32.449	32.2841	32.4945	32.883	32.583	32.8212	32.8332	32.3297	32.4099	32.6474	32.4688	33.1505	32.5785	32.6147	32.7879	32.3804	32.5206
P12821;A0A0A0MSN4	26.9152	27.0866	26.088	26.368	27.0189	26.4229	26.1703	26.5973	26.4296	26.4216	26.4909	25.765	26.2623	26.1618	27.1613	26.7505	26.8874	27.1498	27.3279	26.3156	26.3139	26.0972	27.6386	27.4191	25.9137	25.595	27.0724	26.0718	25.9911	27.2182	27.9313	NA	25.1683	26.8247	26.4254	26.4029	26.332	26.4799	25.3533	25.9368	26.3825	26.0023	26.1473	26.0373	26.1818	25.8961	26.6189	25.8875	25.9509
P12955	28.081	28.9241	28.047	27.9706	27.8685	28.2211	27.8305	27.921	28.4276	27.4547	26.8129	26.3769	26.8858	27.4325	27.3106	27.8213	27.9253	27.5143	28.6511	29.0009	27.9515	28.4445	28.5097	28.37	28.3357	28.2487	27.6374	28.4756	27.4888	27.6771	28.192	28.1918	26.0442	26.5084	26.4804	27.0134	26.8661	27.1425	27.1334	28.5309	28.7436	27.503	27.458	27.1808	26.1436	27.5447	26.9317	27.3807	26.5218
P12956;B1AHC9	27.9516	27.8889	28.3608	28.5608	28.0515	27.7643	28.6319	28.5954	27.3794	27.8592	27.7119	28.4055	27.6748	27.7914	28.3047	27.9369	27.3827	27.9295	28.2576	28.6485	28.3721	28.2704	28.5342	28.1157	28.2748	27.187	27.5103	26.111	28.0153	28.7187	28.1078	26.6195	28.2274	28.174	28.2943	28.2311	27.8069	27.6169	28.7328	28.149	28.3285	27.9205	28.181	28.9205	27.6283	27.0403	27.5249	28.0093	28.7411
P13010	27.4987	27.7676	28.5748	27.9996	27.694	27.8447	28.4499	27.6228	27.5569	27.8169	28.0273	28.5551	27.6329	27.6995	27.9489	27.7361	27.7058	27.8546	27.4103	28.3876	27.3786	27.6234	27.7019	28.1796	27.9237	26.8639	27.4018	28.0534	27.1739	27.6069	27.9676	26.9369	27.812	26.8125	28.0002	27.0921	26.8526	26.8691	27.9181	26.8813	25.2426	27.7892	28.1539	28.3503	27.7549	27.082	26.8518	27.3059	27.894
P13073;H3BPG0;H3BN72;H3BNV9	28.5945	28.5993	28.8152	28.7075	28.6127	28.4103	28.9008	28.592	28.7873	29.0539	28.7959	28.6784	29.0931	28.3659	28.9839	28.7772	29.2625	28.7979	28.2707	26.9902	28.4096	27.776	28.8012	28.6613	28.43	28.6151	29.0385	28.5578	28.9136	28.5301	28.9359	28.5848	28.793	28.4778	29.2739	29.3172	28.4394	27.8528	27.3306	25.3216	27.3831	29.0512	28.6224	28.0449	28.8286	28.1318	29.1544	27.8367	28.6144
P13224	NA	NA	NA	NA	NA	NA	NA	NA	NA	NA	NA	NA	NA	NA	NA	NA	NA	22.9954	27.6225	26.3234	NA	24.0914	NA	NA	24.7228	24.2379	NA	NA	NA	NA	24.2644	25.1987	NA	NA	NA	NA	NA	NA	NA	NA	NA	NA	NA	NA	NA	NA	NA	NA	NA
P13284	NA	NA	NA	NA	NA	NA	NA	NA	NA	NA	NA	NA	NA	NA	NA	NA	NA	26.784	NA	23.1008	22.6166	NA	22.9423	NA	22.2329	NA	NA	NA	21.8563	NA	NA	NA	21.9877	21.7368	22.044	NA	NA	22.3848	21.871	21.8247	NA	NA	NA	NA	NA	22.0816	NA	NA	22.5034
P13473	26.6728	26.9924	25.3208	26.8157	26.775	26.9243	25.6633	26.9668	26.7634	26.4635	25.8796	26.7185	26.4884	26.7881	26.3603	26.0809	26.9895	26.9051	26.1738	26.7036	26.9168	23.8451	27.0828	26.7632	NA	26.1843	24.8587	27.0601	26.5149	27.4965	26.6876	25.8204	NA	25.1388	NA	NA	NA	NA	26.3069	NA	25.3088	26.7426	26.9959	27.0573	NA	NA	27.8838	27.4678	27.6317
P13489	30.4634	30.4911	29.9058	29.7867	30.2202	30.435	30.2679	30.1968	30.4417	29.6192	29.9934	29.463	29.8196	30.8657	30.3044	30.4886	30.4233	30.6548	31.1429	30.8874	30.7043	30.5114	30.9365	31.1203	31.2041	30.189	30.1635	30.5734	29.8395	29.5168	29.664	30.451	30.2451	29.832	29.6615	29.9577	30.167	30.4792	30.5362	30.2907	30.3193	30.6614	30.461	30.9101	30.4433	30.6506	30.2816	30.3005	30.7574
P13498	26.0125	25.6079	24.8625	26.3366	25.0502	25.4444	25.5846	24.6121	25.2573	NA	23.7013	23.3761	24.1301	NA	23.2633	22.8693	23.897	NA	NA	NA	NA	NA	NA	NA	NA	NA	NA	NA	NA	NA	NA	NA	NA	NA	NA	NA	NA	NA	NA	NA	NA	NA	NA	NA	NA	NA	NA	NA	NA
P13639	31.5367	31.5414	31.3787	31.3694	31.2575	31.2828	31.5114	31.2855	31.4545	31.0073	31.2508	31.297	30.9681	31.5435	31.4721	31.2935	31.1391	31.4271	30.8339	31.2641	31.0706	30.9972	31.5776	30.8659	31.0242	30.7928	30.5582	30.9554	31.1014	31.6066	31.0941	30.7574	30.907	31.2555	31.0495	31.2205	30.9648	31.2195	31.2222	31.0755	31.6261	31.4245	30.8124	31.6765	30.9167	30.887	31.3862	30.9674	31.041
P13667	29.9553	29.577	29.1812	28.8797	29.6346	29.3058	29.0095	29.495	29.6607	29.3445	29.0052	29.3076	29.0708	28.9877	28.994	28.6238	28.1257	28.6395	27.8948	28.2638	28.7443	28.8961	29.2044	30.171	26.7179	29.1449	28.8275	28.7779	29.1931	29.604	29.0686	28.3837	29.3917	29.1885	29.1288	28.9128	28.9333	29.0851	29.3595	29.2781	28.9179	28.2082	27.9996	28.1697	28.4398	28.3073	28.7615	28.8948	28.8276
[truncated: 1,656 more rows]
[truncated: 1 more columns]

## Sheet: Transcriptome
ILLUMINA_ID	X1950sc	X2229mes	X2364vis	X2128col	X1959sc	X2029sc	X2039sc	X2040sc	X2045sc	X2059sc	X2065mes	X2087mes	X2118mes	X2119mes	X2120mes	X2125mes	X2127mes	X2128mes	X2301col	X2333col	X2459col	X2464col	X2470col	X2045vis	X2059vis	X2060vis	X2065vis	X2087vis	X2118vis	X2119vis	X2065sc	X2087sc	X2118sc	X2119sc	X2229sc	X2301mes	X2333mes	X1950col	X1959col	X2029col	X2039col	X2125vis	X2127vis	X2128vis	X2364mes	X2459mes	X2464mes	X2470mes	X2059col
[truncated: 47,323 more rows]
[truncated: 43 more columns]
