# Supplementary material for: Multiomics reveal unique signatures of human epiploic adipose tissue related to systemic insulin resistance
Source: HighWire-hosted journal article supplement (doi:10.1136/gutjnl-2021-324603), 2021-10-01
Supplement: gutjnl-2021-324603supp012_data_supplement.xlsx [file gutjnl-2021-324603supp012_data_supplement.xlsx]

## Sheet: EpiISvsOtherATIS
chr	start	stop	adj.p	mean meth difference	2DKS p.value	ENSG	Genes
chr2	177012116	177017797	2.6e-12	0.095829	5.5e-18	ENSG00000128652.7,ENSG00000170166.5,ENSG00000207744.1	HOXD3,HOXD4,MIR10B
chr4	13529101	13531213	2e-10	0.168805	4.3e-16	.
chr10	130830900	130831421	2e-09	-0.156799	4.3e-15	.
chr12	54354973	54355476	4.7e-08	0.206013	1e-13	.
chr1	221049930	221050742	9.6e-08	-0.222458	2e-13	ENSG00000136630.11,ENSG00000257551.1	HLX,HLA-AS1
chr1	245411582	245411712	1.5e-06	-0.157883	3.1e-12	ENSG00000162849.11	KIF26B
chr11	119999692	119999699	9.6e-06	-0.151081	2e-11	ENSG00000137699.12	TRIM29
chr7	27234834	27238059	1.2e-05	0.111187	2.6e-11	ENSG00000106031.6,ENSG00000243766.3	HOXA13,HOTTIP
chr4	111535527	111539352	1.5e-05	-0.130477	3.3e-11	ENSG00000164093.11,ENSG00000250103.1	PITX2,RP11-380D23.2
chr7	51544095	51544475	2.1e-05	-0.148559	4.5e-11	.
chr4	111533508	111533951	2.3e-05	-0.089209	4.9e-11	ENSG00000250103.1	RP11-380D23.2
chr2	176997276	176997707	2.3e-05	0.153456	4.9e-11	ENSG00000175879.7,ENSG00000237380.2	HOXD8,HOXD-AS2
chr10	124899754	124900053	6e-05	0.22428	1.3e-10	.
chr21	38076708	38083586	0.0001	-0.071099	2.1e-10	ENSG00000159263.11	SIM2
chr4	30724563	30724915	0.00013	0.174883	2.8e-10	ENSG00000169851.11	PCDH7
chr17	65040606	65040616	0.00015	-0.092645	3.3e-10	ENSG00000108878.3	CACNG1
chr12	114831534	114838359	0.00016	-0.116541	3.5e-10	ENSG00000089225.15	TBX5
chr18	70419004	70419185	0.00064	-0.125059	1.4e-09	ENSG00000166342.14,ENSG00000252598.1	NETO1,RNA5SP460
chr2	177021701	177024172	0.00077	0.118622	1.6e-09	ENSG00000128652.7	HOXD3
chr11	32447943	32450591	0.0011	0.108021	2.4e-09	ENSG00000184937.8	WT1
chr22	50523941	50523981	0.0016	-0.105971	3.4e-09	ENSG00000100427.11	MLC1
chr12	54380955	54381798	0.0036	0.15071	7.7e-09	ENSG00000180818.4,ENSG00000273049.1	HOXC10,RP11-834C11.12
chr1	3159567	3159645	0.0037	-0.074435	7.8e-09	ENSG00000142611.12	PRDM16
chr2	176963947	176964137	0.0051	0.120636	1.1e-08	ENSG00000170178.5	HOXD12
chr7	131798329	131798556	0.0064	-0.065175	1.4e-08	.
chr15	89533559	89533809	0.0081	-0.152476	1.7e-08	ENSG00000261549.2	RP11-320A16.1
chr2	176977457	176979345	0.011	0.173523	2.3e-08	ENSG00000128710.5	HOXD10
chr2	176981653	176986659	0.013	0.119013	2.7e-08	ENSG00000128709.10,ENSG00000128710.5,ENSG00000237380.2	HOXD9,HOXD10,HOXD-AS2
chr16	1075951	1076283	0.014	-0.104428	2.9e-08	.
chr4	155663093	155663311	0.015	0.122504	3.2e-08	ENSG00000121207.7	LRAT
chr22	20073257	20073403	0.018	-0.095282	3.8e-08	ENSG00000128191.9,ENSG00000221366.1,ENSG00000266567.1	DGCR8,MIR1306,MIR3618
chr1	240693432	240694053	0.019	-0.081111	4.1e-08	ENSG00000180875.4,ENSG00000224359.1	GREM2,RP11-467I20.2
chr4	13524040	13526769	0.019	0.127619	4.1e-08	.
chr6	166100250	166100316	0.022	-0.083819	4.7e-08	ENSG00000112541.9	PDE10A
chr2	88427560	88427630	0.023	-0.144678	4.8e-08	ENSG00000163586.5	FABP1
chr18	19746041	19748010	0.028	-0.109564	5.9e-08	ENSG00000141448.4,ENSG00000266010.1	GATA6,GATA6-AS1
chr5	177374925	177375028	0.028	0.071364	5.9e-08	ENSG00000170089.11,ENSG00000250101.1	RP11-423H2.1,RP11-1252I4.2
chr2	69001623	69002378	0.032	-0.085152	6.8e-08	ENSG00000163219.7	ARHGAP25
chr2	119566108	119566332	0.033	-0.094512	7e-08	.
chr6	57178594	57178623	0.043	-0.085617	9.1e-08	ENSG00000146143.13	PRIM2
chr7	101556035	101556183	0.044	-0.110383	9.4e-08	ENSG00000257923.5	CUX1
chr21	46077561	46077731	0.045	-0.082342	9.5e-08	ENSG00000175894.10,ENSG00000205439.8	TSPEAR,KRTAP12-3
chr6	7427218	7427703	0.046	-0.106993	9.9e-08	.

## Sheet: EpiISvsEpiIR
chr	start	stop	adj.p	meth.diff	2DKS	ENSG	Gene
chr10	135341442	135343248	0.018	0.123303	3.8e-08	ENSG00000130649.5	CYP2E1
chr10	135341442	135343248	0.018	0.123303	3.8e-08	ENSG00000203772.6	SPRN
chr10	135341442	135343248	0.018	0.123303	3.8e-08	ENSG00000268925.1	AL161645.2
