# Supplementary material for: Multiomics reveal unique signatures of human epiploic adipose tissue related to systemic insulin resistance
Source: HighWire-hosted journal article supplement (doi:10.1136/gutjnl-2021-324603), 2021-10-01

## A epiploic vs omental adipose tissue

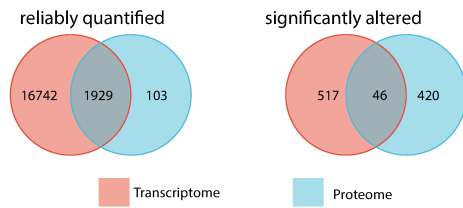

## B Perdikari et al.

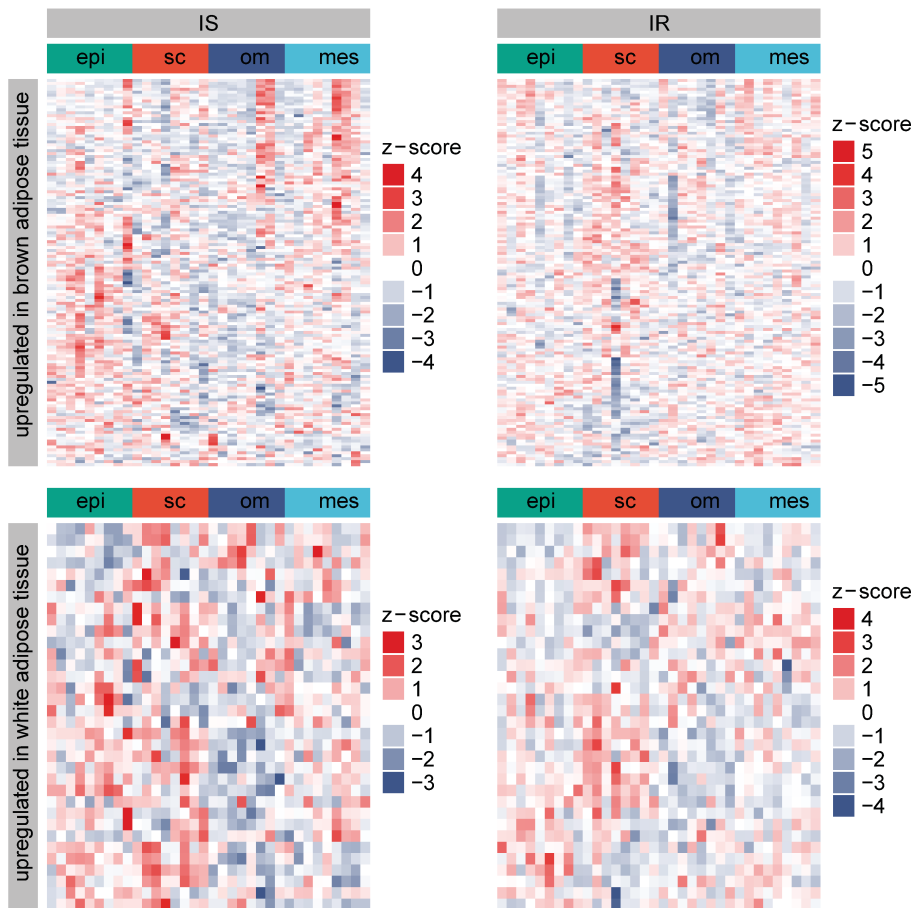

## C Pilkington et al.

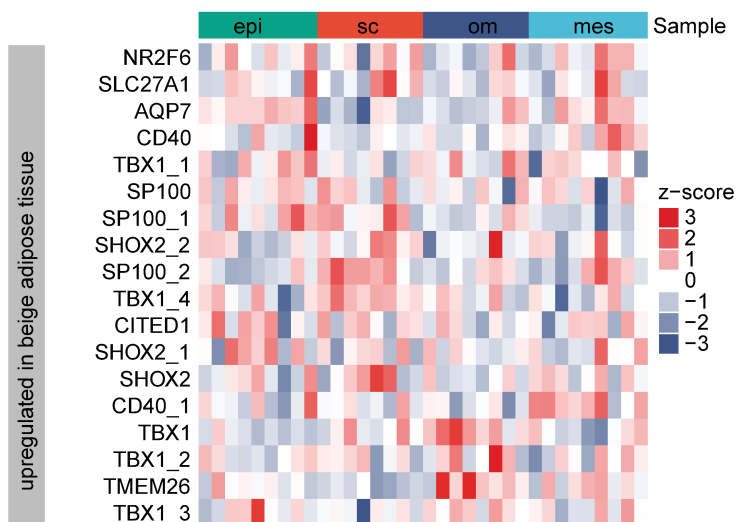

Supplement: gutjnl-2021-324603supp013_data_supplement.pdf [file gutjnl-2021-324603supp013_data_supplement.pdf]
