# Supplementary material for: Multiomics reveal unique signatures of human epiploic adipose tissue related to systemic insulin resistance
Source: HighWire-hosted journal article supplement (doi:10.1136/gutjnl-2021-324603), 2021-10-01

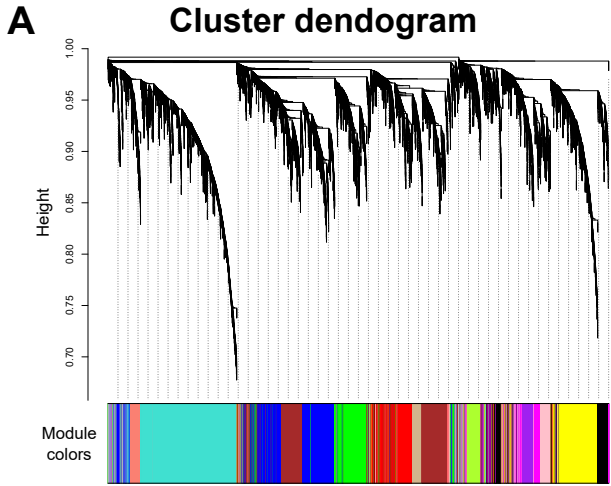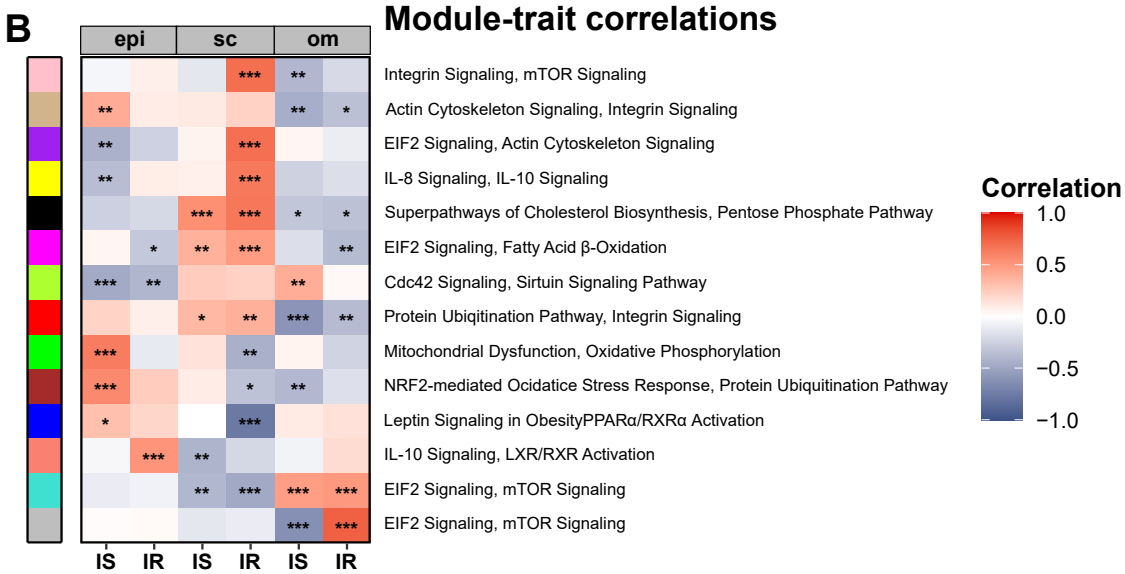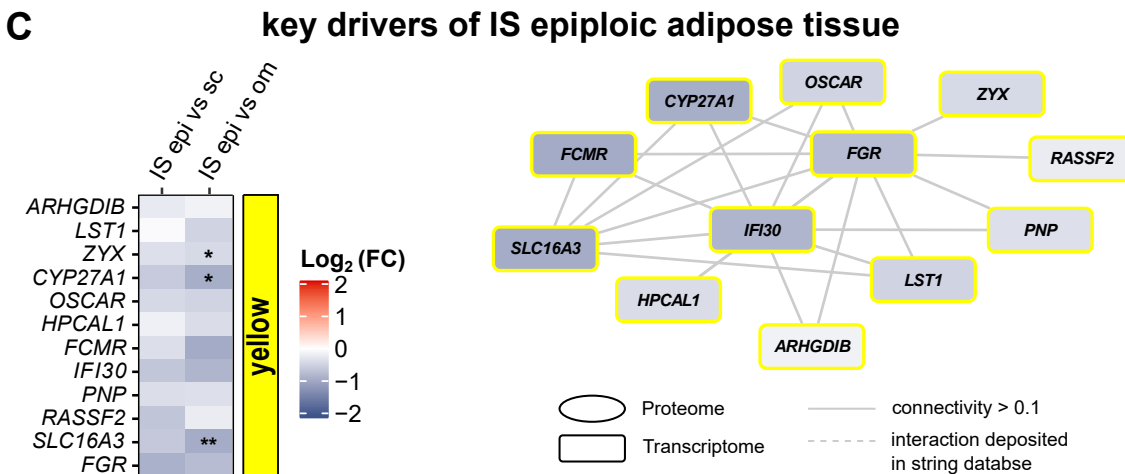

Supplement: gutjnl-2021-324603supp018_data_supplement.pdf [file gutjnl-2021-324603supp018_data_supplement.pdf]
