# Supplementary material for: Multiomics reveal unique signatures of human epiploic adipose tissue related to systemic insulin resistance
Source: HighWire-hosted journal article supplement (doi:10.1136/gutjnl-2021-324603), 2021-10-01
Supplement: gutjnl-2021-324603supp019_data_supplement.xlsx [file gutjnl-2021-324603supp019_data_supplement.xlsx]

## Sheet: Analyte-Module-Assignment
Accession	Module
ILMN_1689336	red
ILMN_1763390	turquoise
ILMN_1739582	red
ILMN_1782412	black
ILMN_2353161	turquoise
ILMN_1718285	black
ILMN_2411236	black
ILMN_1757736	black
ILMN_1786197	turquoise
ILMN_1766712	turquoise
ILMN_2140559	black
ILMN_1721580	black
ILMN_1722809	black
ILMN_1681983	turquoise
ILMN_1782004	turquoise
ILMN_1672908	black
ILMN_1696657	turquoise
ILMN_1728570	turquoise
ILMN_1811468	black
ILMN_2165993	turquoise
ILMN_2118129	turquoise
ILMN_1715684	magenta
ILMN_1670490	turquoise
ILMN_2298577	red
ILMN_1794492	black
ILMN_1796089	blue
ILMN_1705685	turquoise
ILMN_1718898	black
ILMN_1739496	black
ILMN_1782558	black
ILMN_1904578	black
ILMN_1733110	turquoise
ILMN_2087646	turquoise
ILMN_1746658	turquoise
ILMN_2322996	turquoise
ILMN_1813753	turquoise
ILMN_1687220	black
ILMN_3237981	turquoise
ILMN_1653687	turquoise
ILMN_1740717	blue
ILMN_1652631	yellow
ILMN_1664464	turquoise
ILMN_1665425	turquoise
ILMN_1678191	black
ILMN_1725746	turquoise
ILMN_1808245	turquoise
ILMN_1886092	turquoise
ILMN_2125346	turquoise
ILMN_1752965	turquoise
ILMN_1800317	turquoise
ILMN_1752159	black
ILMN_1781149	turquoise
ILMN_1746801	turquoise
ILMN_1778087	turquoise
ILMN_1694426	turquoise
ILMN_2353054	turquoise
ILMN_1725417	turquoise
ILMN_1714433	turquoise
ILMN_1683939	turquoise
ILMN_1802174	turquoise
ILMN_1716815	blue
ILMN_1806787	turquoise
ILMN_1792495	black
ILMN_1765310	turquoise
ILMN_1796423	turquoise
ILMN_1716564	turquoise
ILMN_1759766	turquoise
ILMN_1783956	brown
ILMN_1737650	black
ILMN_1695924	turquoise
ILMN_1709593	black
ILMN_1658709	turquoise
ILMN_1764885	turquoise
ILMN_1726589	black
ILMN_1795937	turquoise
ILMN_1702789	turquoise
ILMN_1777397	black
ILMN_2038775	black
ILMN_2116877	brown
ILMN_1671151	turquoise
ILMN_3272378	turquoise
ILMN_1793025	turquoise
ILMN_2371724	blue
ILMN_2107933	turquoise
ILMN_2072101	turquoise
ILMN_1743345	turquoise
ILMN_1705231	turquoise
ILMN_1681780	turquoise
ILMN_2176592	turquoise
ILMN_1805665	turquoise
ILMN_2349071	blue
ILMN_1778836	turquoise
ILMN_1682937	turquoise
ILMN_2193325	turquoise
ILMN_2049672	red
ILMN_1732538	red
ILMN_1751465	turquoise
ILMN_3188106	black
ILMN_1677851	turquoise
ILMN_1676042	turquoise
ILMN_1719351	turquoise
ILMN_1796801	turquoise
ILMN_1656287	turquoise
ILMN_1717886	turquoise
ILMN_3236160	turquoise
ILMN_2183728	blue
ILMN_1774077	purple
ILMN_1743620	turquoise
ILMN_1760153	turquoise
ILMN_1772312	turquoise
ILMN_1698213	black
ILMN_1738869	black
ILMN_1666076	turquoise
ILMN_2197128	turquoise
ILMN_2366967	turquoise
ILMN_1838863	turquoise
ILMN_1758731	turquoise
ILMN_1800091	turquoise
ILMN_1756992	turquoise
ILMN_1687848	turquoise
ILMN_1653836	yellow
ILMN_1664330	blue
ILMN_1723874	black
ILMN_1789596	yellow
ILMN_1772627	turquoise
ILMN_1798663	brown
ILMN_1651496	turquoise
ILMN_1702363	turquoise
ILMN_1745570	turquoise
ILMN_1711573	turquoise
ILMN_1674367	blue
ILMN_1653028	red
ILMN_1687201	brown
ILMN_2315789	turquoise
ILMN_1676159	turquoise
ILMN_1661628	turquoise
ILMN_2187746	black
ILMN_1708778	magenta
ILMN_2382990	yellow
ILMN_1751886	turquoise
ILMN_1707464	turquoise
ILMN_1711514	blue
ILMN_1685641	turquoise
ILMN_1684959	turquoise
ILMN_1718046	turquoise
ILMN_1814369	turquoise
ILMN_1796734	red
ILMN_1784454	black
ILMN_1710553	turquoise
ILMN_2194688	black
ILMN_1685722	blue
ILMN_1718731	turquoise
ILMN_1699665	black
ILMN_1736412	turquoise
ILMN_1716309	black
ILMN_1844919	blue
ILMN_1677018	turquoise
ILMN_1808059	turquoise
ILMN_1813341	black
ILMN_1708098	blue
ILMN_1740269	turquoise
ILMN_1793695	red
ILMN_1801710	red
ILMN_1700248	turquoise
ILMN_1810235	blue
ILMN_1738742	turquoise
ILMN_2386982	turquoise
ILMN_1767129	blue
ILMN_2065773	turquoise
ILMN_1684306	yellow
ILMN_1789040	turquoise
ILMN_1792689	brown
ILMN_1790350	red
ILMN_3307729	black
ILMN_3240765	red
ILMN_1704537	turquoise
ILMN_2057479	black
ILMN_1653006	black
ILMN_2298301	turquoise
ILMN_1731349	brown
ILMN_1783149	turquoise
ILMN_2395451	magenta
ILMN_1686862	turquoise
ILMN_1751885	blue
ILMN_1759910	black
ILMN_1811437	turquoise
ILMN_1745806	magenta
ILMN_1864685	black
ILMN_1813295	blue
ILMN_1724540	black
ILMN_2393765	turquoise
ILMN_1710544	black
ILMN_1779014	blue
ILMN_1733746	turquoise
ILMN_1718770	turquoise
ILMN_2201678	brown
ILMN_1653501	turquoise
ILMN_1746784	turquoise
ILMN_1716608	turquoise
ILMN_1675325	blue
ILMN_1796925	turquoise
ILMN_1768940	red
ILMN_1695945	turquoise
ILMN_1654331	turquoise
ILMN_1659937	black
ILMN_1661491	turquoise
ILMN_1728011	blue
ILMN_1751785	red
ILMN_2065022	turquoise
ILMN_2181892	turquoise
ILMN_1801516	purple
ILMN_1762531	turquoise
ILMN_1694106	green
ILMN_1798557	turquoise
ILMN_1743357	magenta
ILMN_1716397	turquoise
ILMN_1736911	turquoise
ILMN_1738132	brown
ILMN_1776522	yellow
ILMN_3247578	red
ILMN_2367010	turquoise
ILMN_2198413	red
ILMN_1701007	turquoise
ILMN_1767351	magenta
ILMN_1788118	turquoise
ILMN_2406304	brown
ILMN_1719696	turquoise
ILMN_2353732	turquoise
ILMN_2189371	turquoise
ILMN_1688480	red
ILMN_1799098	turquoise
ILMN_1682226	turquoise
ILMN_2413158	turquoise
ILMN_1658677	turquoise
ILMN_1663490	red
ILMN_2124585	turquoise
ILMN_1783443	turquoise
ILMN_1770247	brown
ILMN_1735762	turquoise
ILMN_1873278	turquoise
ILMN_1730229	turquoise
ILMN_1721134	turquoise
ILMN_1704294	turquoise
ILMN_1654946	turquoise
ILMN_1689086	blue
ILMN_1794638	blue
ILMN_1814002	turquoise
ILMN_1652237	purple
ILMN_1735124	black
ILMN_1654398	turquoise
ILMN_1736103	brown
ILMN_1790098	turquoise
ILMN_1733421	turquoise
ILMN_1737394	purple
ILMN_1780799	red
ILMN_3240912	turquoise
ILMN_1717793	turquoise
ILMN_1684401	yellow
ILMN_1677429	tan
ILMN_1671600	turquoise
ILMN_1769911	turquoise
ILMN_1774761	turquoise
ILMN_1687301	yellow
ILMN_1723962	turquoise
ILMN_1758164	turquoise
ILMN_1713829	black
ILMN_1802646	turquoise
ILMN_1731561	turquoise
ILMN_1748983	green
ILMN_2186983	turquoise
ILMN_2298818	turquoise
ILMN_1714988	red
ILMN_1739103	brown
ILMN_1806667	turquoise
ILMN_1664292	blue
ILMN_1720838	red
ILMN_1773865	yellow
ILMN_2142117	red
ILMN_2365307	yellow
ILMN_2339835	turquoise
ILMN_1658356	turquoise
ILMN_3239775	black
ILMN_1656310	salmon
ILMN_1805999	purple
ILMN_1656837	turquoise
ILMN_2101832	turquoise
ILMN_1771593	magenta
ILMN_3245564	turquoise
ILMN_3306852	green
ILMN_1731862	pink
ILMN_1779558	turquoise
ILMN_2231911	green
ILMN_1699695	green
ILMN_1801767	brown
ILMN_1749636	turquoise
ILMN_1688625	red
ILMN_1701204	blue
ILMN_2223941	turquoise
ILMN_3237503	turquoise
ILMN_1695679	turquoise
ILMN_1723414	red
ILMN_1727778	turquoise
ILMN_1815141	turquoise
ILMN_1691747	black
ILMN_2219683	turquoise
ILMN_1709613	brown
ILMN_1812392	yellow
ILMN_1698259	blue
ILMN_1772612	red
ILMN_1710326	blue
ILMN_2372082	turquoise
ILMN_1753584	turquoise
ILMN_1695946	turquoise
ILMN_1799028	turquoise
ILMN_1676067	pink
ILMN_1739325	turquoise
ILMN_1682326	turquoise
ILMN_1814719	tan
ILMN_1710734	turquoise
ILMN_1693941	turquoise
ILMN_1768812	turquoise
ILMN_1680196	turquoise
ILMN_1672504	magenta
ILMN_1724062	black
ILMN_1743219	turquoise
ILMN_1668851	blue
ILMN_1681249	turquoise
ILMN_1723678	turquoise
ILMN_1724686	turquoise
ILMN_1723115	turquoise
ILMN_1804150	green
ILMN_2064902	turquoise
ILMN_1811387	turquoise
ILMN_1704376	black
ILMN_2082865	turquoise
ILMN_1701558	black
ILMN_2329735	yellow
ILMN_2117508	yellow
ILMN_1784749	turquoise
ILMN_1715175	turquoise
ILMN_1812926	brown
ILMN_1738657	red
ILMN_1651900	turquoise
ILMN_1725090	black
ILMN_1687533	turquoise
ILMN_2166384	blue
ILMN_2380740	blue
ILMN_1674640	turquoise
ILMN_1804357	turquoise
ILMN_2352563	blue
ILMN_1733648	turquoise
ILMN_1674941	green
ILMN_1792538	turquoise
ILMN_1686562	pink
ILMN_2391400	black
ILMN_2373791	red
ILMN_1669114	turquoise
ILMN_1653200	turquoise
ILMN_1796288	tan
ILMN_1792489	yellow
ILMN_1733756	brown
ILMN_1731966	brown
ILMN_1725899	black
ILMN_1711311	turquoise
ILMN_2343278	brown
ILMN_2409167	yellow
ILMN_1797903	turquoise
ILMN_1701613	turquoise
ILMN_1749324	turquoise
ILMN_1754795	red
ILMN_1802167	green
ILMN_1684357	magenta
ILMN_1761119	brown
ILMN_2295518	turquoise
ILMN_2098126	turquoise
ILMN_3250273	turquoise
ILMN_2158902	brown
ILMN_2111932	yellow
ILMN_2105441	turquoise
ILMN_1779228	turquoise
ILMN_1801090	turquoise
ILMN_1677505	turquoise
ILMN_1773855	turquoise
ILMN_1816603	turquoise
ILMN_1812702	black
ILMN_3237755	turquoise
ILMN_1678170	red
ILMN_1730777	turquoise
ILMN_3272441	turquoise
ILMN_2043809	turquoise
ILMN_1694240	brown
ILMN_1768482	turquoise
ILMN_1671295	green
ILMN_2053103	turquoise
ILMN_2387105	turquoise
ILMN_1803956	turquoise
ILMN_1733983	turquoise
ILMN_1719641	turquoise
ILMN_1740728	turquoise
ILMN_1790603	green
ILMN_1723123	turquoise
ILMN_1672057	green
ILMN_1699610	red
ILMN_1727815	turquoise
ILMN_1749432	blue
ILMN_1664176	turquoise
ILMN_2317364	black
ILMN_1755974	magenta
ILMN_1770338	turquoise
ILMN_1747934	turquoise
ILMN_1779182	turquoise
ILMN_1694810	turquoise
ILMN_1653719	black
ILMN_2112638	blue
ILMN_2214790	turquoise
ILMN_2395652	black
ILMN_1819608	purple
ILMN_1714384	green
ILMN_1724994	pink
ILMN_2294978	green
ILMN_1699768	turquoise
ILMN_2384241	brown
ILMN_1807633	green
ILMN_2381841	purple
ILMN_1695506	black
ILMN_1764571	turquoise
ILMN_2409642	turquoise
ILMN_1751956	red
ILMN_1677497	turquoise
ILMN_1808821	black
ILMN_1659106	magenta
ILMN_1688205	turquoise
ILMN_1739576	purple
ILMN_1855430	black
ILMN_1746699	turquoise
ILMN_1739154	turquoise
ILMN_2156936	blue
ILMN_2068104	turquoise
ILMN_1683774	turquoise
ILMN_1724480	turquoise
ILMN_2234956	blue
ILMN_1701655	yellow
ILMN_1680591	turquoise
ILMN_1741003	red
ILMN_1680925	turquoise
ILMN_1714335	blue
ILMN_1703374	red
ILMN_2347592	pink
ILMN_1803429	yellow
ILMN_1812433	turquoise
ILMN_1669206	black
ILMN_1677038	brown
ILMN_1729033	turquoise
ILMN_1743373	turquoise
ILMN_1798690	turquoise
ILMN_1723048	turquoise
ILMN_2317751	turquoise
ILMN_1804255	brown
ILMN_1792076	red
ILMN_3239965	salmon
ILMN_1740052	turquoise
ILMN_1809639	turquoise
ILMN_2347349	turquoise
ILMN_1659312	red
ILMN_1676215	turquoise
ILMN_1672743	turquoise
ILMN_1676302	turquoise
ILMN_1813399	turquoise
ILMN_1833858	turquoise
ILMN_2162989	black
ILMN_1720501	turquoise
ILMN_1655796	brown
ILMN_1708340	turquoise
ILMN_1656248	tan
ILMN_2401253	green
ILMN_2328776	turquoise
ILMN_2341548	turquoise
ILMN_1689004	yellow
ILMN_1719205	greenyellow
ILMN_1787673	turquoise
ILMN_1730816	salmon
ILMN_1746704	pink
ILMN_2353129	turquoise
ILMN_2371911	turquoise
ILMN_1699644	blue
ILMN_1670079	green
ILMN_2139125	turquoise
ILMN_1787658	turquoise
ILMN_1660114	turquoise
ILMN_1774287	turquoise
ILMN_1657199	turquoise
ILMN_1742044	green
ILMN_1671326	black
ILMN_1724493	turquoise
ILMN_2153373	brown
ILMN_1709659	turquoise
ILMN_1664024	green
ILMN_1760982	blue
ILMN_1767135	red
ILMN_1799856	yellow
ILMN_2335557	red
ILMN_1684558	turquoise
ILMN_2406468	brown
ILMN_1741727	yellow
ILMN_1754570	turquoise
ILMN_2114720	turquoise
ILMN_3244987	blue
ILMN_2407703	turquoise
ILMN_1792682	turquoise
ILMN_1674719	brown
ILMN_1778319	turquoise
ILMN_1732151	yellow
ILMN_1748650	green
ILMN_1782761	red
ILMN_1729596	yellow
ILMN_1772522	red
ILMN_1663213	black
ILMN_1748538	turquoise
ILMN_1746712	pink
ILMN_1676296	brown
ILMN_1764166	green
ILMN_1715543	tan
ILMN_1805564	turquoise
ILMN_1763688	purple
ILMN_2331729	turquoise
ILMN_1804051	yellow
ILMN_1657708	pink
ILMN_1754179	turquoise
ILMN_1780861	yellow
ILMN_1656185	black
ILMN_1727315	yellow
ILMN_1781819	yellow
ILMN_1769129	black
ILMN_3245057	black
ILMN_1700831	green
ILMN_1703511	green
ILMN_1715674	pink
ILMN_1732609	yellow
ILMN_1804351	turquoise
ILMN_1808657	black
ILMN_1676283	turquoise
ILMN_1666594	yellow
ILMN_2364072	turquoise
ILMN_1759598	greenyellow
ILMN_3242176	red
ILMN_1705750	turquoise
ILMN_1750101	yellow
ILMN_1804798	turquoise
ILMN_1656691	red
ILMN_1710756	yellow
ILMN_1661755	yellow
ILMN_1695025	turquoise
ILMN_1660871	yellow
ILMN_2161577	turquoise
ILMN_1779374	turquoise
ILMN_1790352	tan
ILMN_3247848	turquoise
ILMN_1776395	turquoise
ILMN_2230025	turquoise
ILMN_1669323	purple
ILMN_1656373	turquoise
ILMN_1742534	turquoise
ILMN_1700081	black
ILMN_1784294	turquoise
ILMN_1725338	yellow
ILMN_2123402	blue
ILMN_2341067	blue
ILMN_1757129	blue
ILMN_1694980	magenta
ILMN_1687306	turquoise
ILMN_2348788	yellow
ILMN_1776516	turquoise
ILMN_2357730	turquoise
ILMN_2311020	turquoise
ILMN_2044453	turquoise
ILMN_2391141	blue
ILMN_3251132	blue
ILMN_1723843	green
ILMN_1663032	black
ILMN_1774272	black
ILMN_1729314	black
ILMN_2196569	purple
ILMN_1727479	purple
ILMN_1691127	turquoise
ILMN_1688959	turquoise
ILMN_1781388	turquoise
ILMN_1728049	pink
ILMN_1811364	turquoise
ILMN_1660890	brown
ILMN_1728057	red
ILMN_1740842	turquoise
ILMN_2410938	black
ILMN_1668446	blue
ILMN_1695299	turquoise
ILMN_3237270	brown
ILMN_2083567	turquoise
ILMN_1812297	black
ILMN_2325506	turquoise
ILMN_1676548	black
ILMN_2391264	turquoise
ILMN_2160929	yellow
ILMN_1803211	turquoise
ILMN_1792885	salmon
ILMN_1694778	turquoise
ILMN_1767448	brown
ILMN_1761120	blue
ILMN_1798841	turquoise
ILMN_1714067	black
ILMN_1764549	turquoise
ILMN_2285817	green
ILMN_1778924	turquoise
ILMN_2174369	brown
ILMN_1717262	turquoise
ILMN_1779597	tan
ILMN_1727087	turquoise
ILMN_1737025	blue
ILMN_2382648	blue
ILMN_1680453	blue
ILMN_2356111	turquoise
ILMN_1731745	pink
ILMN_1695745	turquoise
ILMN_1779855	turquoise
ILMN_1788250	turquoise
ILMN_1704452	turquoise
ILMN_1708131	blue
ILMN_2228180	pink
ILMN_1701507	brown
ILMN_1763080	purple
ILMN_1694847	blue
ILMN_2095610	turquoise
ILMN_1752932	blue
ILMN_1789058	blue
ILMN_1912997	turquoise
ILMN_3232894	blue
ILMN_1754103	turquoise
ILMN_1804673	turquoise
ILMN_1741171	salmon
ILMN_1693538	turquoise
ILMN_1798256	yellow
ILMN_1657145	magenta
ILMN_1706643	yellow
ILMN_2179717	greenyellow
ILMN_1763837	yellow
ILMN_2325837	turquoise
ILMN_1815679	turquoise
ILMN_2364521	purple
ILMN_1660691	yellow
ILMN_1684836	brown
ILMN_2079655	turquoise
ILMN_1752510	green
ILMN_1754727	blue
ILMN_1658333	yellow
ILMN_2379130	yellow
ILMN_1812461	pink
ILMN_2149164	blue
ILMN_1760727	green
ILMN_1665909	yellow
ILMN_2405297	red
ILMN_1661646	red
ILMN_1659544	yellow
ILMN_1724907	turquoise
ILMN_1751400	turquoise
ILMN_1669550	yellow
ILMN_1651315	yellow
ILMN_2042595	blue
ILMN_1737380	black
ILMN_1762207	turquoise
ILMN_1814629	turquoise
ILMN_1744949	green
ILMN_1784948	yellow
ILMN_1693341	turquoise
ILMN_1771026	black
ILMN_3232159	turquoise
ILMN_1783805	magenta
ILMN_1787843	brown
ILMN_1798496	greenyellow
ILMN_2219246	red
ILMN_1852022	red
ILMN_1699852	turquoise
ILMN_1744897	turquoise
ILMN_2340131	green
ILMN_1789909	red
ILMN_2216918	black
ILMN_2325347	turquoise
ILMN_1787576	turquoise
ILMN_3247082	turquoise
ILMN_1701134	green
ILMN_1722056	turquoise
ILMN_1729287	tan
ILMN_1676099	yellow
ILMN_1796737	turquoise
ILMN_1712545	yellow
ILMN_1713807	turquoise
ILMN_1680659	brown
ILMN_1809490	black
ILMN_1788689	blue
ILMN_1652246	turquoise
ILMN_1790741	purple
ILMN_1734897	turquoise
ILMN_1738684	turquoise
ILMN_1682176	pink
ILMN_2240003	red
ILMN_1790778	turquoise
ILMN_1728514	brown
ILMN_1788283	yellow
ILMN_1734830	yellow
ILMN_1775163	blue
ILMN_1708672	yellow
ILMN_2309446	turquoise
ILMN_2410929	brown
ILMN_1729117	yellow
ILMN_1660021	yellow
ILMN_1681543	blue
ILMN_1702858	green
ILMN_1723443	turquoise
ILMN_1765557	purple
ILMN_1691892	pink
ILMN_1709590	turquoise
ILMN_2221014	brown
ILMN_1781514	turquoise
ILMN_3191541	turquoise
ILMN_2072178	green
ILMN_1768506	turquoise
ILMN_1808114	salmon
ILMN_2383707	turquoise
ILMN_1660000	blue
ILMN_1657643	brown
ILMN_2059689	brown
ILMN_2217601	turquoise
ILMN_1776073	blue
ILMN_2086238	brown
ILMN_1657803	black
ILMN_1743784	brown
ILMN_1755364	magenta
ILMN_2171640	red
ILMN_1706706	black
ILMN_1764795	turquoise
ILMN_3237932	turquoise
ILMN_1794844	magenta
ILMN_1773427	brown
ILMN_2373982	greenyellow
ILMN_1788607	blue
ILMN_3230180	green
ILMN_1760180	blue
ILMN_2186061	green
ILMN_1702384	turquoise
ILMN_1681846	turquoise
ILMN_1703016	turquoise
ILMN_1711566	turquoise
ILMN_2100815	salmon
ILMN_1781479	greenyellow
ILMN_1682099	turquoise
ILMN_1764309	green
ILMN_1692398	turquoise
ILMN_2358626	red
ILMN_1765371	turquoise
ILMN_2173291	green
ILMN_3303612	turquoise
ILMN_2174437	tan
ILMN_1807925	red
ILMN_2390338	red
ILMN_1748827	turquoise
ILMN_1680937	brown
ILMN_1680973	blue
ILMN_2103761	turquoise
ILMN_1779401	green
ILMN_2096372	turquoise
ILMN_1665775	green
ILMN_1712298	brown
ILMN_1753568	brown
ILMN_1667081	yellow
ILMN_1707503	turquoise
ILMN_3242586	turquoise
ILMN_1781290	red
ILMN_1705617	yellow
ILMN_3251341	yellow
ILMN_1740185	yellow
ILMN_2082130	purple
ILMN_1680675	black
ILMN_1726575	turquoise
ILMN_2312194	green
ILMN_1657760	turquoise
ILMN_2390318	green
ILMN_2353202	turquoise
ILMN_1715905	black
ILMN_1696974	blue
ILMN_1721713	black
ILMN_1784300	turquoise
ILMN_2089752	turquoise
ILMN_1800787	brown
ILMN_2366719	magenta
ILMN_1809931	blue
ILMN_1739161	brown
ILMN_1666967	red
ILMN_1796094	red
ILMN_2333670	salmon
ILMN_1745501	turquoise
ILMN_1674661	magenta
ILMN_1709348	blue
ILMN_2049184	magenta
ILMN_2304495	tan
ILMN_1768705	turquoise
ILMN_1676449	greenyellow
ILMN_1676749	turquoise
ILMN_1696749	purple
ILMN_1791067	pink
ILMN_2210753	salmon
ILMN_1740265	purple
ILMN_1815445	black
ILMN_1749848	turquoise
ILMN_1734184	yellow
ILMN_1653415	turquoise
ILMN_1723625	turquoise
ILMN_2392189	turquoise
ILMN_1671568	green
ILMN_1751086	yellow
ILMN_1666399	turquoise
ILMN_1683664	turquoise
ILMN_1690839	blue
ILMN_1782922	turquoise
ILMN_1776109	yellow
ILMN_1724666	turquoise
ILMN_2264625	blue
ILMN_2364529	yellow
ILMN_1739257	turquoise
ILMN_2180848	blue
ILMN_1886515	turquoise
ILMN_1691413	red
ILMN_1716465	red
ILMN_2390526	turquoise
ILMN_1732809	black
ILMN_1775753	black
ILMN_2175220	turquoise
ILMN_1755352	turquoise
ILMN_1779015	turquoise
ILMN_1740407	red
ILMN_1770922	salmon
ILMN_1734190	turquoise
ILMN_1728535	pink
ILMN_1654966	turquoise
ILMN_1683470	brown
ILMN_2391355	blue
ILMN_1774602	red
ILMN_1719303	yellow
ILMN_1722898	turquoise
ILMN_2294976	green
ILMN_1682100	brown
ILMN_2261416	turquoise
ILMN_1713124	red
ILMN_1710075	green
ILMN_1758281	green
ILMN_1750674	yellow
ILMN_1764228	salmon
ILMN_1733851	turquoise
ILMN_1729450	blue
ILMN_1691341	turquoise
ILMN_3243924	red
ILMN_1715927	blue
ILMN_1666096	blue
ILMN_2067656	yellow
ILMN_1719906	green
ILMN_1717702	turquoise
ILMN_1688780	yellow
ILMN_1763461	green
ILMN_1739683	blue
ILMN_1776602	brown
ILMN_1702503	turquoise
ILMN_1801121	brown
ILMN_2098743	red
ILMN_1742427	magenta
ILMN_1691790	turquoise
ILMN_1810051	green
ILMN_2166696	red
ILMN_1738589	brown
ILMN_1672717	brown
ILMN_1712719	red
ILMN_1811598	green
ILMN_1689968	yellow
ILMN_1726245	brown
ILMN_3239861	blue
ILMN_1767934	turquoise
ILMN_1678730	pink
ILMN_1769694	turquoise
ILMN_1781010	turquoise
ILMN_2080684	turquoise
ILMN_1798123	pink
ILMN_1793630	turquoise
ILMN_1690806	brown
ILMN_1664577	green
ILMN_1715476	turquoise
ILMN_1768425	greenyellow
ILMN_1661717	brown
ILMN_1784553	green
ILMN_1742866	red
ILMN_1814120	green
ILMN_1808395	turquoise
ILMN_2141455	blue
ILMN_1796316	yellow
ILMN_1680313	yellow
ILMN_1707123	yellow
ILMN_1752591	blue
ILMN_1682038	blue
ILMN_1722869	turquoise
ILMN_1699552	brown
ILMN_1690963	black
ILMN_1708925	turquoise
ILMN_2089329	blue
ILMN_2157219	green
ILMN_1785284	green
ILMN_1810053	brown
ILMN_1745807	black
ILMN_1784753	brown
ILMN_1688295	pink
ILMN_1787345	turquoise
ILMN_3237986	red
ILMN_1728887	turquoise
ILMN_1718271	magenta
ILMN_1745256	black
ILMN_1741392	yellow
ILMN_1727840	purple
ILMN_1761833	turquoise
ILMN_1727309	red
ILMN_1769601	brown
ILMN_1664051	yellow
ILMN_1704369	red
ILMN_1693635	turquoise
ILMN_1735499	turquoise
ILMN_1710906	brown
ILMN_1729288	purple
ILMN_1800912	green
ILMN_1687612	brown
ILMN_2131447	turquoise
ILMN_2075818	purple
ILMN_1857017	black
ILMN_1713636	yellow
ILMN_2408748	pink
ILMN_1785891	turquoise
ILMN_1669773	blue
ILMN_2071641	turquoise
ILMN_1773017	turquoise
ILMN_1736242	black
ILMN_1692123	green
ILMN_2376847	turquoise
ILMN_2395373	turquoise
ILMN_2124241	turquoise
ILMN_1730572	turquoise
ILMN_1651347	yellow
ILMN_1788184	green
ILMN_1811178	green
ILMN_2232177	purple
ILMN_2382829	green
ILMN_1717163	salmon
ILMN_1748840	magenta
ILMN_1659371	pink
ILMN_2401933	turquoise
ILMN_2347193	green
ILMN_1758613	purple
ILMN_2338963	pink
ILMN_1729487	turquoise
ILMN_2344283	black
ILMN_1813607	brown
ILMN_1739335	green
ILMN_2360401	black
ILMN_1730907	brown
ILMN_1661554	purple
ILMN_1654920	blue
ILMN_1720083	black
ILMN_1809352	blue
ILMN_1766222	black
ILMN_1695706	greenyellow
ILMN_3236866	green
ILMN_1671116	black
ILMN_1789507	black
ILMN_3224204	tan
ILMN_2381899	brown
ILMN_2071809	turquoise
ILMN_1678766	turquoise
ILMN_1714383	turquoise
ILMN_1745964	black
ILMN_1673518	green
ILMN_1702501	black
ILMN_1724504	magenta
ILMN_2407879	turquoise
ILMN_1680367	red
ILMN_1669113	yellow
ILMN_2090105	pink
ILMN_1746137	green
ILMN_1703408	turquoise
ILMN_3243982	blue
ILMN_2323801	green
ILMN_1805998	black
ILMN_2282352	green
ILMN_1805147	brown
ILMN_1673566	turquoise
ILMN_1770466	brown
ILMN_1797698	turquoise
ILMN_1766713	green
ILMN_3247645	turquoise
ILMN_1773352	turquoise
ILMN_3246294	red
ILMN_1801441	blue
ILMN_2340259	turquoise
ILMN_1722662	red
ILMN_1694799	red
ILMN_1811133	turquoise
ILMN_1683678	turquoise
ILMN_1769634	greenyellow
ILMN_2308582	red
ILMN_1682930	turquoise
ILMN_1666453	blue
ILMN_3248403	brown
ILMN_1795170	turquoise
ILMN_1743755	black
ILMN_1737163	yellow
ILMN_1688775	yellow
ILMN_3236656	green
ILMN_2285404	turquoise
ILMN_2388070	black
ILMN_2260991	red
ILMN_1668582	green
ILMN_1720235	green
ILMN_3307791	turquoise
ILMN_1771800	turquoise
ILMN_1727540	yellow
ILMN_2395969	brown
ILMN_1654632	turquoise
ILMN_1779989	black
ILMN_1733675	yellow
ILMN_2211030	turquoise
ILMN_1663092	brown
ILMN_1688154	turquoise
ILMN_2405254	turquoise
ILMN_1746948	magenta
ILMN_2141482	magenta
ILMN_1803376	turquoise
ILMN_1720303	brown
ILMN_1713458	black
ILMN_1796923	red
ILMN_1695041	turquoise
ILMN_1721128	greenyellow
ILMN_1652677	green
ILMN_1786278	green
ILMN_1690822	black
ILMN_1761797	yellow
ILMN_2305544	yellow
ILMN_1758311	green
ILMN_3237774	red
ILMN_1658706	black
ILMN_1764175	tan
ILMN_2283388	red
ILMN_2401258	green
ILMN_1727194	yellow
ILMN_1666536	turquoise
ILMN_1653133	brown
ILMN_1796912	tan
ILMN_1707308	yellow
ILMN_1861270	yellow
ILMN_1716407	turquoise
ILMN_1799516	yellow
ILMN_1701466	greenyellow
ILMN_2386179	red
ILMN_1735495	yellow
ILMN_1811933	green
ILMN_2321416	yellow
ILMN_2374683	turquoise
ILMN_1728501	turquoise
ILMN_1748281	green
ILMN_1694767	turquoise
ILMN_1718734	turquoise
ILMN_2056606	magenta
ILMN_1662166	turquoise
ILMN_1683462	pink
ILMN_1797154	green
ILMN_2083469	green
ILMN_1776724	turquoise
ILMN_1709153	black
ILMN_1718565	green
ILMN_1712859	green
ILMN_1815086	turquoise
ILMN_1687757	red
ILMN_2217329	red
ILMN_2370091	blue
ILMN_3250870	black
ILMN_2192072	yellow
ILMN_1667707	salmon
ILMN_2381397	brown
ILMN_1694514	turquoise
ILMN_1813544	green
ILMN_1678535	blue
ILMN_1778360	tan
ILMN_2371458	brown
ILMN_1720311	red
ILMN_1685714	red
ILMN_1694548	blue
ILMN_2396410	green
ILMN_1856533	turquoise
ILMN_1701731	yellow
ILMN_1671263	turquoise
ILMN_2118663	red
ILMN_1655563	pink
ILMN_1797974	brown
ILMN_1706521	black
ILMN_1685327	blue
ILMN_2218648	yellow
ILMN_1724495	red
ILMN_1740441	pink
ILMN_1795183	turquoise
ILMN_1699978	turquoise
ILMN_2052373	turquoise
ILMN_1778213	turquoise
ILMN_2395856	brown
ILMN_1804884	blue
ILMN_1656165	blue
ILMN_1749478	turquoise
ILMN_2342579	turquoise
ILMN_1763137	blue
ILMN_1786444	brown
ILMN_1750497	green
ILMN_1705116	pink
ILMN_1709132	green
ILMN_1770865	turquoise
ILMN_1681087	green
ILMN_1755926	yellow
ILMN_1771376	brown
ILMN_1796235	magenta
ILMN_1694913	brown
ILMN_1762106	yellow
ILMN_1690754	black
ILMN_1793615	pink
ILMN_1734366	turquoise
ILMN_2334296	yellow
ILMN_1807283	pink
ILMN_1722829	turquoise
ILMN_1778755	turquoise
ILMN_3245659	pink
ILMN_1754529	purple
ILMN_2106902	green
ILMN_1659206	purple
ILMN_1681081	tan
ILMN_1653042	yellow
ILMN_1778543	brown
ILMN_1656186	blue
ILMN_1774890	purple
ILMN_1701998	turquoise
ILMN_1808333	pink
ILMN_1734542	purple
ILMN_1703088	blue
ILMN_1721770	turquoise
ILMN_1732767	black
ILMN_1672741	brown
ILMN_1668498	blue
ILMN_1763638	turquoise
ILMN_1683082	purple
ILMN_1765146	black
ILMN_1785170	turquoise
ILMN_1746763	brown
ILMN_2136455	red
ILMN_3237830	green
ILMN_1734288	yellow
ILMN_2357361	green
ILMN_2414878	brown
ILMN_1720513	greenyellow
ILMN_1813338	turquoise
ILMN_3270641	turquoise
ILMN_2094875	turquoise
ILMN_1771957	purple
ILMN_3235185	greenyellow
ILMN_1795089	turquoise
ILMN_1707199	brown
ILMN_1687967	green
ILMN_1750969	brown
ILMN_1759184	greenyellow
ILMN_1776888	brown
ILMN_1716247	turquoise
ILMN_2271149	turquoise
ILMN_3244876	turquoise
ILMN_1660732	turquoise
ILMN_1797359	turquoise
ILMN_1740523	red
ILMN_1705871	green
ILMN_1782743	brown
ILMN_1771627	red
ILMN_2318568	turquoise
ILMN_1692511	turquoise
ILMN_1803073	turquoise
ILMN_1722945	red
ILMN_2174127	turquoise
ILMN_1726520	purple
ILMN_1800796	magenta
ILMN_1740938	yellow
ILMN_1795838	brown
ILMN_1794823	blue
ILMN_1717809	purple
ILMN_1694588	salmon
ILMN_2340565	brown
ILMN_2313074	magenta
ILMN_1657373	turquoise
ILMN_1749244	green
ILMN_1679949	turquoise
ILMN_2096985	green
ILMN_1805177	green
ILMN_1664014	green
ILMN_1795778	turquoise
ILMN_2083243	brown
ILMN_2109708	yellow
ILMN_1812721	magenta
ILMN_2359345	green
ILMN_2087080	turquoise
ILMN_1652465	blue
ILMN_2172318	brown
ILMN_2324672	brown
ILMN_1716728	black
ILMN_1663160	turquoise
ILMN_1698885	yellow
ILMN_1714710	turquoise
ILMN_1752478	green
ILMN_1790761	black
ILMN_2317701	turquoise
ILMN_2401344	turquoise
ILMN_1691570	brown
ILMN_2207504	tan
ILMN_3307906	tan
ILMN_1753249	turquoise
ILMN_1790650	brown
ILMN_1714228	green
ILMN_1754489	turquoise
ILMN_1654552	turquoise
ILMN_1739813	turquoise
ILMN_1781680	brown
ILMN_1760174	green
ILMN_1766000	turquoise
ILMN_1686804	turquoise
ILMN_1719695	turquoise
ILMN_2172755	turquoise
ILMN_1704656	red
ILMN_2307450	blue
ILMN_3243471	turquoise
ILMN_1776151	turquoise
ILMN_1719975	black
ILMN_1664028	purple
ILMN_1656718	black
ILMN_1743806	yellow
ILMN_2185845	salmon
ILMN_1793549	brown
ILMN_1702447	turquoise
ILMN_3237448	turquoise
ILMN_1689002	magenta
ILMN_1656574	brown
ILMN_1806123	purple
ILMN_1670870	yellow
ILMN_2229214	green
ILMN_1788778	red
ILMN_1651705	green
ILMN_1688279	turquoise
ILMN_1728934	yellow
ILMN_1752520	turquoise
ILMN_1775170	green
ILMN_1676265	brown
ILMN_1679185	turquoise
ILMN_1712888	salmon
ILMN_1769390	brown
ILMN_1776963	blue
ILMN_1697460	tan
ILMN_1754716	turquoise
ILMN_2406299	turquoise
ILMN_1690420	turquoise
ILMN_1795839	green
ILMN_1772588	red
ILMN_1734602	turquoise
ILMN_1807074	turquoise
ILMN_1683250	blue
ILMN_1764871	green
ILMN_1730765	green
ILMN_1662306	brown
ILMN_1762115	green
ILMN_1726928	blue
ILMN_1778964	turquoise
ILMN_1812070	turquoise
ILMN_1765204	green
ILMN_1746819	green
ILMN_1809456	green
ILMN_2352303	yellow
ILMN_1737089	purple
ILMN_3249235	turquoise
ILMN_1748438	purple
ILMN_1682404	green
ILMN_1770768	turquoise
ILMN_1666206	green
ILMN_1713454	turquoise
ILMN_1749213	yellow
ILMN_1806612	turquoise
ILMN_1769615	turquoise
ILMN_2338480	brown
ILMN_1792679	purple
ILMN_2292123	brown
ILMN_1657797	purple
ILMN_1739253	turquoise
ILMN_2117987	blue
ILMN_1741014	turquoise
ILMN_1673788	red
ILMN_1655987	salmon
ILMN_1761804	tan
ILMN_1723846	yellow
ILMN_1706441	turquoise
ILMN_3307935	black
ILMN_1781256	blue
ILMN_1699489	pink
ILMN_1787808	red
ILMN_1783909	yellow
ILMN_1699206	turquoise
ILMN_1758829	turquoise
ILMN_1756701	magenta
ILMN_3251232	black
ILMN_1808634	brown
ILMN_1802654	turquoise
ILMN_2374687	turquoise
ILMN_2378952	tan
ILMN_1665095	greenyellow
ILMN_1690252	purple
ILMN_1692077	brown
ILMN_1699160	turquoise
ILMN_1688848	black
ILMN_1880983	red
ILMN_2335604	turquoise
ILMN_1753789	red
ILMN_2248589	red
ILMN_1788701	turquoise
ILMN_2324561	green
ILMN_1811363	red
ILMN_2411282	yellow
ILMN_1652082	yellow
ILMN_1693604	black
ILMN_1792455	turquoise
ILMN_1805765	turquoise
ILMN_1746359	turquoise
ILMN_1652797	blue
ILMN_1717853	brown
ILMN_1690223	turquoise
ILMN_1669772	pink
ILMN_3241870	black
ILMN_1695423	yellow
ILMN_1886422	brown
ILMN_1708328	turquoise
ILMN_1663684	magenta
ILMN_1716093	brown
ILMN_1756982	yellow
ILMN_1789266	purple
ILMN_1729368	blue
ILMN_1879480	blue
ILMN_1745954	yellow
ILMN_1683263	greenyellow
ILMN_2075892	brown
ILMN_1665235	brown
ILMN_1673352	turquoise
ILMN_1863994	black
ILMN_1706051	turquoise
ILMN_1663099	blue
ILMN_1748093	greenyellow
ILMN_1712687	black
ILMN_2104924	green
ILMN_1665132	green
ILMN_3242459	purple
ILMN_2086417	red
ILMN_1795678	black
ILMN_2056479	brown
ILMN_1764577	salmon
ILMN_2127298	blue
ILMN_2408683	brown
ILMN_1696048	yellow
ILMN_2363273	red
ILMN_1701017	green
ILMN_3243381	blue
ILMN_2097421	blue
ILMN_1769382	blue
ILMN_1802316	turquoise
ILMN_1673820	brown
ILMN_1795865	turquoise
ILMN_2062701	turquoise
ILMN_1657064	black
ILMN_1707612	brown
ILMN_3235176	magenta
ILMN_2355033	blue
ILMN_1755120	blue
ILMN_1715748	turquoise
ILMN_1658800	blue
ILMN_1792078	blue
ILMN_1705991	yellow
ILMN_1736847	pink
ILMN_2183687	turquoise
ILMN_1813139	pink
ILMN_1727043	yellow
ILMN_2203588	magenta
ILMN_1742379	greenyellow
ILMN_1786722	yellow
ILMN_2247664	blue
ILMN_1661622	black
ILMN_2218002	black
ILMN_1682658	greenyellow
ILMN_1782810	red
ILMN_1756685	turquoise
ILMN_2408572	green
ILMN_1767766	brown
ILMN_1687213	turquoise
ILMN_1758090	turquoise
ILMN_2184556	turquoise
ILMN_1723124	blue
ILMN_2312709	greenyellow
ILMN_1707448	turquoise
ILMN_1740169	green
ILMN_2355486	turquoise
ILMN_1705442	yellow
ILMN_1789136	brown
ILMN_3249477	yellow
ILMN_1739521	blue
ILMN_1690040	green
ILMN_1778561	blue
ILMN_1724293	red
ILMN_1696432	brown
ILMN_1658494	red
ILMN_1808824	turquoise
ILMN_1680712	turquoise
ILMN_2189406	turquoise
ILMN_1778154	black
ILMN_1659769	tan
ILMN_1715991	blue
ILMN_2408576	yellow
ILMN_1699925	black
ILMN_1670796	greenyellow
ILMN_1910893	brown
ILMN_1700811	blue
ILMN_3246728	turquoise
ILMN_2183510	yellow
ILMN_1752340	pink
ILMN_2225698	brown
ILMN_1672807	black
ILMN_1764321	red
ILMN_1749009	brown
ILMN_1753143	turquoise
ILMN_1751120	brown
ILMN_1751572	green
ILMN_1804953	red
ILMN_1664071	turquoise
ILMN_1779234	turquoise
ILMN_2364971	red
ILMN_1769394	pink
ILMN_1756928	brown
ILMN_1707232	tan
ILMN_2142554	greenyellow
ILMN_1658464	red
ILMN_1797892	blue
ILMN_1705733	blue
ILMN_1674344	turquoise
ILMN_1811851	black
ILMN_1799082	blue
ILMN_1803423	green
ILMN_1786308	green
ILMN_2188722	turquoise
ILMN_2412192	black
ILMN_2402600	turquoise
ILMN_1673252	black
ILMN_1764158	turquoise
ILMN_1801606	green
ILMN_2151056	brown
ILMN_1761456	blue
ILMN_1796409	salmon
ILMN_2415303	salmon
ILMN_1738955	blue
ILMN_1721968	black
ILMN_1654598	turquoise
ILMN_3180409	turquoise
ILMN_1658759	green
ILMN_1815346	turquoise
ILMN_2345319	turquoise
ILMN_2330570	brown
ILMN_1697802	red
ILMN_1655414	turquoise
ILMN_1713182	turquoise
ILMN_2101930	brown
ILMN_2379560	brown
ILMN_3250798	greenyellow
ILMN_1710495	turquoise
ILMN_1711799	blue
ILMN_1749583	green
ILMN_1803476	tan
ILMN_1778226	turquoise
ILMN_1717803	green
ILMN_1761850	yellow
ILMN_1781752	turquoise
ILMN_1772910	turquoise
ILMN_1764231	blue
ILMN_1718629	green
ILMN_1775703	purple
ILMN_2381697	turquoise
ILMN_1705676	tan
ILMN_2325534	green
ILMN_1653878	turquoise
ILMN_1811345	brown
ILMN_2375557	green
ILMN_2093775	turquoise
ILMN_1791511	turquoise
ILMN_1713139	turquoise
ILMN_1738750	blue
ILMN_2396982	purple
ILMN_3193918	green
ILMN_1673129	blue
ILMN_1682599	turquoise
ILMN_1697733	turquoise
ILMN_1805773	turquoise
ILMN_2344455	turquoise
ILMN_1700822	yellow
ILMN_1678961	brown
ILMN_2362847	blue
ILMN_1737398	blue
ILMN_1686367	yellow
ILMN_1795270	purple
ILMN_1677200	turquoise
ILMN_1676924	turquoise
ILMN_1714167	green
ILMN_1715864	grey
ILMN_1806432	greenyellow
ILMN_1799015	green
ILMN_1814333	turquoise
ILMN_1881960	brown
ILMN_1805606	blue
ILMN_1779841	pink
ILMN_2245305	yellow
ILMN_1787324	turquoise
ILMN_1768282	magenta
ILMN_1727360	green
ILMN_1728168	red
ILMN_2365023	green
ILMN_1702125	tan
ILMN_3238889	green
ILMN_1698038	turquoise
ILMN_3247223	turquoise
ILMN_1769013	yellow
ILMN_1725193	turquoise
ILMN_2309926	turquoise
ILMN_1799104	red
ILMN_1708267	turquoise
ILMN_1699357	turquoise
ILMN_1655611	turquoise
ILMN_1814077	turquoise
ILMN_1727633	turquoise
ILMN_1801889	blue
ILMN_1683980	yellow
ILMN_1804339	turquoise
ILMN_1758214	magenta
ILMN_1751452	brown
ILMN_1734596	blue
ILMN_2094266	black
ILMN_1715384	blue
ILMN_2352953	red
ILMN_1682463	turquoise
ILMN_1672121	greenyellow
ILMN_2372698	brown
ILMN_1659936	yellow
ILMN_2370208	yellow
ILMN_2352380	salmon
ILMN_2323366	green
ILMN_2202915	yellow
ILMN_1778917	black
ILMN_1732923	turquoise
ILMN_3239621	brown
ILMN_1755504	green
ILMN_1667711	green
ILMN_1702633	tan
ILMN_1720889	yellow
ILMN_2128967	green
ILMN_2059294	brown
ILMN_2094938	turquoise
ILMN_1917341	green
ILMN_1803652	tan
ILMN_1693090	greenyellow
ILMN_1696450	turquoise
ILMN_1749109	yellow
ILMN_1709043	red
ILMN_1701875	yellow
ILMN_1761594	red
ILMN_1654473	brown
ILMN_1789196	purple
ILMN_1669928	magenta
ILMN_1711199	blue
ILMN_1789535	pink
ILMN_3241136	yellow
ILMN_1911605	turquoise
ILMN_2307903	salmon
ILMN_1670532	green
ILMN_1722981	salmon
ILMN_2046730	yellow
ILMN_2414268	brown
ILMN_1690241	blue
ILMN_1696590	turquoise
ILMN_1719627	yellow
ILMN_1692748	turquoise
ILMN_1791847	green
ILMN_1754538	brown
ILMN_1780236	green
ILMN_1735474	purple
ILMN_1813104	black
ILMN_1766269	black
ILMN_1667744	pink
ILMN_1783627	magenta
ILMN_1677384	green
ILMN_1742250	green
ILMN_1843198	green
ILMN_1761101	red
ILMN_1687074	brown
ILMN_1711314	brown
ILMN_1727790	blue
ILMN_1659888	purple
ILMN_1674380	turquoise
ILMN_1679460	blue
ILMN_2401779	turquoise
ILMN_1767349	black
ILMN_2398847	black
ILMN_2063168	blue
ILMN_2049274	blue
ILMN_1751439	black
ILMN_2386444	magenta
ILMN_1779515	tan
ILMN_1801105	tan
ILMN_1742917	green
ILMN_1760990	turquoise
ILMN_2397646	turquoise
ILMN_1723971	tan
ILMN_1706635	black
ILMN_1696839	turquoise
ILMN_1798189	green
ILMN_1659990	red
ILMN_1720606	blue
ILMN_1735220	brown
ILMN_1761463	yellow
ILMN_1767113	turquoise
ILMN_1697267	turquoise
ILMN_1728083	green
ILMN_3247452	tan
ILMN_2181445	green
ILMN_1790354	blue
ILMN_1768449	red
ILMN_2326262	green
ILMN_2413816	blue
ILMN_3239795	green
ILMN_2406892	green
ILMN_1701308	purple
ILMN_1801421	greenyellow
ILMN_2375360	turquoise
ILMN_1685403	yellow
ILMN_1742187	brown
ILMN_1665717	turquoise
ILMN_2338323	yellow
ILMN_1746376	turquoise
ILMN_1762932	brown
ILMN_1655433	red
ILMN_1746856	brown
ILMN_1654737	blue
ILMN_1651958	turquoise
ILMN_1730082	blue
ILMN_1803855	turquoise
ILMN_1689156	purple
ILMN_1717229	black
ILMN_3242330	turquoise
ILMN_2150112	magenta
ILMN_1670672	tan
ILMN_1779324	turquoise
ILMN_2347541	yellow
ILMN_1757370	purple
ILMN_1730002	turquoise
ILMN_2182148	blue
ILMN_1718961	brown
ILMN_2128795	magenta
ILMN_2334042	green
ILMN_1659240	yellow
ILMN_3265343	blue
ILMN_1720484	black
ILMN_2319077	turquoise
ILMN_1717165	blue
ILMN_3236858	turquoise
ILMN_1653709	blue
ILMN_1809292	blue
ILMN_1689800	black
ILMN_1723884	red
ILMN_1797475	turquoise
ILMN_2307861	yellow
ILMN_1900661	green
ILMN_1740493	turquoise
ILMN_1731064	green
ILMN_1731518	blue
ILMN_1679754	turquoise
ILMN_1714159	black
ILMN_1748707	yellow
ILMN_1773063	green
ILMN_1752923	turquoise
ILMN_1736692	turquoise
ILMN_1666222	black
ILMN_1673544	tan
ILMN_1796471	brown
ILMN_1748323	magenta
ILMN_1756501	blue
ILMN_1764087	brown
ILMN_1794968	magenta
ILMN_2109197	brown
ILMN_1669983	green
ILMN_1750678	turquoise
ILMN_1768820	purple
ILMN_1755937	red
ILMN_1748651	purple
ILMN_1716382	turquoise
ILMN_1657624	magenta
ILMN_1789508	brown
ILMN_1727466	blue
ILMN_1717727	turquoise
ILMN_1692754	yellow
ILMN_1655137	turquoise
ILMN_1777411	green
ILMN_1669465	blue
ILMN_2357134	yellow
ILMN_1806030	purple
ILMN_1725519	turquoise
ILMN_2297765	turquoise
ILMN_2331087	salmon
ILMN_3242229	black
ILMN_1673950	green
ILMN_1776105	brown
ILMN_1685679	blue
ILMN_2311674	tan
ILMN_1693882	turquoise
ILMN_1709067	turquoise
ILMN_1733415	red
ILMN_2348367	blue
ILMN_2145116	turquoise
ILMN_2150402	brown
ILMN_1762803	turquoise
ILMN_1713867	yellow
ILMN_1847494	green
ILMN_1685703	green
ILMN_2152581	black
ILMN_1792669	magenta
ILMN_1686623	salmon
ILMN_1689306	brown
ILMN_1682987	turquoise
ILMN_1726682	red
ILMN_1728047	purple
ILMN_1753525	turquoise
ILMN_1668592	brown
ILMN_1719998	turquoise
ILMN_1692177	blue
ILMN_1796059	brown
ILMN_2354269	turquoise
ILMN_1791078	brown
ILMN_1775016	blue
ILMN_2149226	red
ILMN_1696767	blue
ILMN_1681269	turquoise
ILMN_1681103	pink
ILMN_1774589	purple
ILMN_2308950	turquoise
ILMN_1795679	black
ILMN_2269136	turquoise
ILMN_1712657	blue
ILMN_1693259	blue
ILMN_1664294	purple
ILMN_1762766	brown
ILMN_1782688	blue
ILMN_2341343	brown
ILMN_2226324	red
ILMN_1781952	brown
ILMN_1764861	green
ILMN_1709630	pink
ILMN_2228938	brown
ILMN_3187324	blue
ILMN_1709799	green
ILMN_1793859	green
ILMN_1759341	yellow
ILMN_1705310	turquoise
ILMN_1782098	turquoise
ILMN_1732410	turquoise
ILMN_1688886	brown
ILMN_2234343	green
ILMN_1784113	turquoise
ILMN_2303166	black
ILMN_1744725	tan
ILMN_1684461	turquoise
ILMN_2290118	red
ILMN_2175465	turquoise
ILMN_1815057	black
ILMN_1781672	blue
ILMN_2362232	blue
ILMN_2390457	red
ILMN_1666122	turquoise
ILMN_2239772	brown
ILMN_1652407	red
ILMN_1676663	red
ILMN_1705928	greenyellow
ILMN_1740024	green
ILMN_1681310	yellow
ILMN_1663772	turquoise
ILMN_1756999	brown
ILMN_3242551	brown
ILMN_2337789	tan
ILMN_1739751	yellow
ILMN_1695606	turquoise
ILMN_3238680	green
ILMN_1711023	black
ILMN_1804562	yellow
ILMN_1655702	brown
ILMN_1674421	blue
ILMN_1801913	purple
ILMN_1732452	yellow
ILMN_1669484	turquoise
ILMN_1747546	red
ILMN_1656501	turquoise
ILMN_1801068	black
ILMN_1741997	pink
ILMN_2205999	blue
ILMN_1698365	red
ILMN_1762281	greenyellow
ILMN_2278152	blue
ILMN_1795085	pink
ILMN_1781791	brown
ILMN_2318685	yellow
ILMN_1667295	purple
ILMN_3248263	greenyellow
ILMN_1655312	brown
ILMN_1744046	blue
ILMN_1805636	purple
ILMN_2058251	brown
ILMN_2070896	green
ILMN_1803024	turquoise
ILMN_1661500	turquoise
ILMN_1686152	yellow
ILMN_2333367	yellow
ILMN_1738494	green
ILMN_1754655	greenyellow
ILMN_1658265	blue
ILMN_1810941	brown
ILMN_1744212	salmon
ILMN_3187852	turquoise
ILMN_1736510	brown
ILMN_1804735	turquoise
ILMN_1764754	turquoise
ILMN_3199483	red
ILMN_1691557	green
ILMN_2199768	yellow
ILMN_1779256	blue
ILMN_2334359	blue
ILMN_1792910	greenyellow
ILMN_1744381	yellow
ILMN_1738530	purple
ILMN_1815500	turquoise
ILMN_1773388	salmon
ILMN_1676616	turquoise
ILMN_2257665	red
ILMN_1806320	turquoise
ILMN_1801814	blue
ILMN_1670695	turquoise
ILMN_2096654	purple
ILMN_2107991	pink
ILMN_1663119	black
ILMN_2266595	yellow
ILMN_1725791	blue
ILMN_2153485	blue
ILMN_1779979	brown
ILMN_1725139	turquoise
ILMN_1702636	tan
ILMN_1664622	green
ILMN_1719599	turquoise
ILMN_2364928	brown
ILMN_1660552	black
ILMN_2205963	turquoise
ILMN_1734929	magenta
ILMN_1789702	red
ILMN_2192032	red
ILMN_1803348	brown
ILMN_2253732	blue
ILMN_1789999	yellow
ILMN_2338785	turquoise
ILMN_1810055	green
ILMN_3238072	turquoise
ILMN_2365465	turquoise
ILMN_1811114	yellow
ILMN_1666615	turquoise
ILMN_1775486	turquoise
ILMN_2408946	tan
ILMN_1664369	blue
ILMN_2297626	turquoise
ILMN_1814701	blue
ILMN_1669424	pink
ILMN_1754423	brown
ILMN_1794512	pink
ILMN_2398159	turquoise
ILMN_1779486	brown
ILMN_1794056	yellow
ILMN_1679838	turquoise
ILMN_1761113	black
ILMN_2380494	black
ILMN_3242174	turquoise
ILMN_1658965	black
ILMN_1814327	brown
ILMN_1757604	purple
ILMN_1760667	green
ILMN_2199389	tan
ILMN_2404539	brown
ILMN_2126038	black
ILMN_1702073	magenta
ILMN_1807206	black
ILMN_1671452	brown
ILMN_1756784	yellow
ILMN_2151368	turquoise
ILMN_2408430	pink
ILMN_1710284	black
ILMN_2401618	tan
ILMN_1672024	brown
ILMN_1741491	pink
ILMN_2366041	blue
ILMN_2411745	turquoise
ILMN_1880406	green
ILMN_1677446	tan
ILMN_1766966	green
ILMN_1729455	blue
ILMN_3249608	black
ILMN_1785356	brown
ILMN_3244117	turquoise
ILMN_1730101	turquoise
ILMN_1690487	blue
ILMN_1788783	yellow
ILMN_1740555	turquoise
ILMN_1734254	turquoise
ILMN_1697971	yellow
ILMN_2377496	purple
ILMN_2170353	brown
ILMN_1762260	turquoise
ILMN_1707631	magenta
ILMN_1746013	purple
ILMN_1701877	purple
ILMN_1784364	purple
ILMN_1776490	greenyellow
ILMN_1691884	red
ILMN_1797526	turquoise
ILMN_1746565	turquoise
ILMN_1790197	brown
ILMN_1696806	black
ILMN_1743402	turquoise
ILMN_1773082	turquoise
ILMN_1664303	red
ILMN_1695972	turquoise
ILMN_1666894	magenta
ILMN_1711650	green
ILMN_1787750	turquoise
ILMN_1670970	brown
ILMN_2406557	blue
ILMN_1727390	blue
ILMN_1735822	brown
ILMN_1705301	turquoise
ILMN_2405642	pink
ILMN_1748473	turquoise
ILMN_1725241	tan
ILMN_1692058	green
ILMN_1737918	salmon
ILMN_1694686	black
ILMN_3237907	magenta
ILMN_2254635	yellow
ILMN_1802780	salmon
ILMN_1705743	tan
ILMN_1702255	turquoise
ILMN_1668510	green
ILMN_1693483	turquoise
ILMN_1653161	pink
ILMN_1714349	brown
ILMN_1778333	turquoise
ILMN_1782754	turquoise
ILMN_1697328	brown
ILMN_1718610	black
ILMN_1701700	turquoise
ILMN_1723158	yellow
ILMN_1723004	yellow
ILMN_1796497	turquoise
ILMN_1712639	tan
ILMN_1733221	turquoise
ILMN_2278653	turquoise
ILMN_2163873	black
ILMN_1715715	tan
ILMN_1741971	brown
ILMN_2314208	blue
ILMN_1669553	brown
ILMN_1790534	yellow
ILMN_1740505	blue
ILMN_1812841	brown
ILMN_1678745	blue
ILMN_2390227	red
ILMN_1736127	turquoise
ILMN_1661000	brown
ILMN_2409318	blue
ILMN_1663575	red
ILMN_1727458	turquoise
ILMN_1779706	yellow
ILMN_2078466	black
ILMN_3251337	blue
ILMN_2358457	pink
[truncated: 7,010 more rows]

## Sheet: IPA complete
"-Log10(pvalue.adj)"	"zscore"	module	pathway
0.0573878	NA	black	14-3-3-mediated Signaling
0	NA	black	1D-myo-inositol Hexakisphosphate Biosynthesis II (Mammalian)
0	NA	black	2-ketoglutarate Dehydrogenase Complex
0	NA	black	2-oxobutanoate Degradation I
0	NA	black	4-aminobutyrate Degradation I
0	NA	black	Acetate Conversion to Acetyl-CoA
0	NA	black	Acetyl-CoA Biosynthesis I (Pyruvate Dehydrogenase Complex)
0	1	black	Actin Cytoskeleton Signaling
0	NA	black	Actin Nucleation by ARP-WASP Complex
0	NA	black	Acute Phase Response Signaling
0	NA	black	Acyl-CoA Hydrolysis
0	NA	black	Acyl Carrier Protein Metabolism
0.336149	NA	black	Adenine and Adenosine Salvage I
0.727298	NA	black	Adenine and Adenosine Salvage III
0	NA	black	Adenine and Adenosine Salvage VI
0.0573878	NA	black	Adenosine Nucleotides Degradation II
0	NA	black	Adipogenesis pathway
0	NA	black	Adrenomedullin signaling pathway
0.0573878	NA	black	Agranulocyte Adhesion and Diapedesis
0.0764892	NA	black	Agrin Interactions at Neuromuscular Junction
0	NA	black	Airway Pathology in Chronic Obstructive Pulmonary Disease
0	NA	black	Alanine Biosynthesis II
0	NA	black	Alanine Biosynthesis III
0	NA	black	Alanine Degradation III
0	NA	black	Aldosterone Signaling in Epithelial Cells
0	NA	black	Altered T Cell and B Cell Signaling in Rheumatoid Arthritis
0.312061	1.134	black	AMPK Signaling
0.0573878	NA	black	Amyloid Processing
0.312061	0.447	black	Amyotrophic Lateral Sclerosis Signaling
0	NA	black	Androgen Biosynthesis
0	NA	black	Androgen Signaling
0	NA	black	Angiopoietin Signaling
0	NA	black	Antioxidant Action of Vitamin C
0	NA	black	Antiproliferative Role of Somatostatin Receptor 2
0	NA	black	Antiproliferative Role of TOB in T Cell Signaling
0	NA	black	Apelin Adipocyte Signaling Pathway
0	NA	black	Apelin Cardiomyocyte Signaling Pathway
0	NA	black	Apelin Endothelial Signaling Pathway
0.0332727	NA	black	Apelin Liver Signaling Pathway
0.0573878	NA	black	Apelin Muscle Signaling Pathway
0	NA	black	April Mediated Signaling
0.727298	NA	black	Arginine Biosynthesis IV
0.862507	NA	black	Arsenate Detoxification I (Glutaredoxin)
0	NA	black	Aryl Hydrocarbon Receptor Signaling
0.312061	NA	black	Aspartate Biosynthesis
0	NA	black	Assembly of RNA Polymerase I Complex
0	NA	black	Atherosclerosis Signaling
0	NA	black	ATM Signaling
0.0573878	NA	black	Autophagy
0.0573878	NA	black	Axonal Guidance Signaling
0	NA	black	B Cell Activating Factor Signaling
0	NA	black	B Cell Receptor Signaling
0.503577	0	black	BAG2 Signaling Pathway
0.0224407	NA	black	Basal Cell Carcinoma Signaling
0	NA	black	BER pathway
0.00252468	NA	black	BEX2 Signaling Pathway
0	NA	black	Bile Acid Biosynthesis, Neutral Pathway
0	NA	black	Biotin-carboxyl Carrier Protein Assembly
0	NA	black	Bladder Cancer Signaling
0.203529	NA	black	BMP signaling pathway
0	NA	black	Branched-chain Î±-keto acid Dehydrogenase Complex
0	NA	black	Breast Cancer Regulation by Stathmin1
0.0533979	NA	black	Calcium-induced T Lymphocyte Apoptosis
0	NA	black	Calcium Signaling
0	NA	black	Calcium Transport I
0.186859	-0.816	black	cAMP-mediated signaling
0	NA	black	Cancer Drug Resistance By Drug Efflux
0	NA	black	Cardiac Hypertrophy Signaling
0	1.633	black	Cardiac Hypertrophy Signaling (Enhanced)
0.250873	0	black	Cardiac Î²-adrenergic Signaling
0.251513	NA	black	Caveolar-mediated Endocytosis Signaling
0	NA	black	CCR3 Signaling in Eosinophils
0	NA	black	CCR5 Signaling in Macrophages
0	NA	black	CD27 Signaling in Lymphocytes
0.0224407	NA	black	CD28 Signaling in T Helper Cells
0	NA	black	CD40 Signaling
0	NA	black	Cdc42 Signaling
0.250873	-1	black	CDK5 Signaling
0	NA	black	CDP-diacylglycerol Biosynthesis I
0	NA	black	Cell Cycle: G1/S Checkpoint Regulation
0.0573878	NA	black	Cell Cycle: G2/M DNA Damage Checkpoint Regulation
0	NA	black	Cellular Effects of Sildenafil (Viagra)
0	NA	black	Ceramide Signaling
0	NA	black	Chemokine Signaling
0	NA	black	Cholecystokinin/Gastrin-mediated Signaling
0.38571	NA	black	Cholesterol Biosynthesis I
0.38571	NA	black	Cholesterol Biosynthesis II (via 24,25-dihydrolanosterol)
0.38571	NA	black	Cholesterol Biosynthesis III (via Desmosterol)
0	NA	black	Chondroitin and Dermatan Biosynthesis
0	NA	black	Chondroitin Sulfate Biosynthesis (Late Stages)
0	NA	black	Chondroitin Sulfate Degradation (Metazoa)
0	NA	black	Chronic Myeloid Leukemia Signaling
0	NA	black	Clathrin-mediated Endocytosis Signaling
0	NA	black	CMP-N-acetylneuraminate Biosynthesis I (Eukaryotes)
0	NA	black	CNTF Signaling
0	NA	black	Coagulation System
0	NA	black	Coenzyme A Biosynthesis
0.0588405	NA	black	Colanic Acid Building Blocks Biosynthesis
0	NA	black	Colorectal Cancer Metastasis Signaling
0	NA	black	Communication between Innate and Adaptive Immune Cells
0.111716	NA	black	Complement System
0	NA	black	Corticotropin Releasing Hormone Signaling
0	NA	black	Creatine-phosphate Biosynthesis
0	NA	black	Crosstalk between Dendritic Cells and Natural Killer Cells
0	NA	black	CTLA4 Signaling in Cytotoxic T Lymphocytes
0	NA	black	CXCR4 Signaling
0.22634	NA	black	Cyclins and Cell Cycle Regulation
0	NA	black	Cysteine Biosynthesis III (mammalia)
0	NA	black	D-glucuronate Degradation I
0	NA	black	D-mannose Degradation
0	NA	black	D-myo-inositol (1,3,4)-trisphosphate Biosynthesis
0	NA	black	D-myo-inositol (1,4,5)-trisphosphate Degradation
0.0573878	-1	black	D-myo-inositol (1,4,5,6)-Tetrakisphosphate Biosynthesis
0.0573878	-1	black	D-myo-inositol (3,4,5,6)-tetrakisphosphate Biosynthesis
0	NA	black	Death Receptor Signaling
0	NA	black	Dendritic Cell Maturation
0.0573878	NA	black	Dermatan Sulfate Degradation (Metazoa)
0	NA	black	Diphthamide Biosynthesis
0	NA	black	DNA damage-induced 14-3-3Ïƒ Signaling
0	NA	black	Dolichol and Dolichyl Phosphate Biosynthesis
0	NA	black	Dolichyl-diphosphooligosaccharide Biosynthesis
0.167677	0	black	Dopamine-DARPP32 Feedback in cAMP Signaling
0.0435304	NA	black	Dopamine Degradation
0.0764892	NA	black	Dopamine Receptor Signaling
0	NA	black	dTMP De Novo Biosynthesis
0	NA	black	EGF Signaling
0.0377381	NA	black	Eicosanoid Signaling
0.0573878	NA	black	EIF2 Signaling
0	NA	black	Endocannabinoid Cancer Inhibition Pathway
0	NA	black	Endocannabinoid Developing Neuron Pathway
0	NA	black	Endocannabinoid Neuronal Synapse Pathway
0	NA	black	Endometrial Cancer Signaling
0.0559069	NA	black	Endoplasmic Reticulum Stress Pathway
0	NA	black	Endothelin-1 Signaling
0.0332727	NA	black	eNOS Signaling
0	NA	black	Ephrin B Signaling
0	NA	black	Ephrin Receptor Signaling
0	NA	black	Epithelial Adherens Junction Signaling
0	NA	black	ErbB Signaling
0	NA	black	ErbB2-ErbB3 Signaling
0	NA	black	ErbB4 Signaling
0.0753084	0.447	black	ERK/MAPK Signaling
0.0224407	NA	black	ERK5 Signaling
0	NA	black	Erythropoietin Signaling
0	NA	black	Estrogen-Dependent Breast Cancer Signaling
0	NA	black	Estrogen Biosynthesis
0	0.447	black	Estrogen Receptor Signaling
0.0242494	NA	black	Ethanol Degradation II
0.312061	NA	black	Ethanol Degradation IV
0	NA	black	Eumelanin Biosynthesis
0	NA	black	Factors Promoting Cardiogenesis in Vertebrates
0.46795	NA	black	FAK Signaling
0	NA	black	FAT10 Cancer Signaling Pathway
0.727298	NA	black	FAT10 Signaling Pathway
0.0573878	NA	black	Fatty Acid Î±-oxidation
0.0180218	NA	black	Fatty Acid Î²-oxidation I
0	NA	black	Fatty Acid Î²-oxidation III (Unsaturated, Odd Number)
0	NA	black	Fc Epsilon RI Signaling
0	NA	black	FcÎ³ Receptor-mediated Phagocytosis in Macrophages and Monocytes
0	NA	black	FcÎ³RIIB Signaling in B Lymphocytes
0	NA	black	FGF Signaling
0	NA	black	FLT3 Signaling in Hematopoietic Progenitor Cells
0	NA	black	fMLP Signaling in Neutrophils
0	NA	black	Folate Polyglutamylation
0	NA	black	Folate Transformations I
0.0573878	NA	black	FXR/RXR Activation
0	NA	black	G-Protein Coupled Receptor Signaling
0	NA	black	G Beta Gamma Signaling
0	NA	black	G Protein Signaling Mediated by Tubby
0.0573878	NA	black	GABA Receptor Signaling
0.22634	NA	black	Galactose Degradation I (Leloir Pathway)
0.035369	NA	black	Gap Junction Signaling
0	NA	black	GDNF Family Ligand-Receptor Interactions
0	NA	black	GDP-L-fucose Biosynthesis II (from L-fucose)
0.194859	NA	black	GDP-mannose Biosynthesis
0	NA	black	Geranylgeranyldiphosphate Biosynthesis
0.138524	NA	black	Germ Cell-Sertoli Cell Junction Signaling
0	NA	black	GÎ±12/13 Signaling
0	NA	black	GÎ±i Signaling
0	NA	black	GÎ±q Signaling
0	NA	black	GÎ±s Signaling
0	NA	black	Glioblastoma Multiforme Signaling
0	NA	black	Glioma Invasiveness Signaling
0	NA	black	Glioma Signaling
0	NA	black	Glucocorticoid Biosynthesis
0	NA	black	Glucocorticoid Receptor Signaling
0.22634	NA	black	Gluconeogenesis I
0.336149	NA	black	Glutamate Biosynthesis II
0.312061	NA	black	Glutamate Degradation II
0	NA	black	Glutamate Degradation III (via 4-aminobutyrate)
0.336149	NA	black	Glutamate Degradation X
0	NA	black	Glutamine Biosynthesis I
0.312061	NA	black	Glutaryl-CoA Degradation
0.312061	NA	black	Glutathione Biosynthesis
0	NA	black	Glutathione Redox Reactions I
0	NA	black	Glycerol-3-phosphate Shuttle
0	NA	black	Glycerol Degradation I
0.167677	NA	black	Glycogen Biosynthesis II (from UDP-D-Glucose)
0.0864851	NA	black	Glycogen Degradation II
0.0764892	NA	black	Glycogen Degradation III
0.889493	1	black	Glycolysis I
0	NA	black	GM-CSF Signaling
0	NA	black	GNRH Signaling
0	NA	black	GP6 Signaling Pathway
0.0224407	NA	black	GPCR-Mediated Integration of Enteroendocrine Signaling Exemplified by an L Cell
0	NA	black	GPCR-Mediated Nutrient Sensing in Enteroendocrine Cells
0	NA	black	Graft-versus-Host Disease Signaling
0.0573878	NA	black	Granulocyte Adhesion and Diapedesis
0	NA	black	Granzyme A Signaling
0	NA	black	Granzyme B Signaling
1.27557	NA	black	Guanine and Guanosine Salvage I
0.0764892	NA	black	Guanosine Nucleotides Degradation III
0	NA	black	Gustation Pathway
0.46795	NA	black	Heme Biosynthesis II
0.862507	NA	black	Heme Degradation
0.118405	NA	black	Heparan Sulfate Biosynthesis
0.0559069	NA	black	Heparan Sulfate Biosynthesis (Late Stages)
0	NA	black	Hepatic Cholestasis
0.0559069	NA	black	Hepatic Fibrosis / Hepatic Stellate Cell Activation
0	0.816	black	Hepatic Fibrosis Signaling Pathway
0	NA	black	HER-2 Signaling in Breast Cancer
0	NA	black	Hereditary Breast Cancer Signaling
0	NA	black	HGF Signaling
0	NA	black	HIF1Î± Signaling
0.195086	NA	black	HIPPO signaling
0.0764892	NA	black	Histamine Degradation
0	NA	black	HMGB1 Signaling
0.180127	-0.816	black	HOTAIR Regulatory Pathway
0.158224	0	black	Huntington's Disease Signaling
0	NA	black	Hypoxia Signaling in the Cardiovascular System
0	NA	black	Î±-Adrenergic Signaling
0	NA	black	Î±-tocopherol Degradation
0.46795	NA	black	Î³-glutamyl Cycle
0.0573878	NA	black	Î³-linolenate Biosynthesis II (Animals)
0	NA	black	iCOS-iCOSL Signaling in T Helper Cells
0	NA	black	IGF-1 Signaling
0	NA	black	IL-1 Signaling
0.111716	NA	black	IL-10 Signaling
0	NA	black	IL-12 Signaling and Production in Macrophages
0	NA	black	IL-15 Production
0	NA	black	IL-15 Signaling
0	NA	black	IL-17 Signaling
0.0360916	NA	black	IL-17A Signaling in Gastric Cells
0	NA	black	IL-2 Signaling
0	NA	black	IL-23 Signaling Pathway
0	NA	black	IL-3 Signaling
0	NA	black	IL-4 Signaling
0	NA	black	IL-6 Signaling
0	NA	black	IL-8 Signaling
0	2	black	ILK Signaling
0	NA	black	Induction of Apoptosis by HIV1
0	NA	black	Inflammasome pathway
0	NA	black	Inhibition of Angiogenesis by TSP1
1.27557	1.265	black	Inhibition of ARE-Mediated mRNA Degradation Pathway
0	NA	black	Inhibition of Matrix Metalloproteases
0	NA	black	iNOS Signaling
0.312061	NA	black	Inosine-5'-phosphate Biosynthesis II
0	NA	black	Insulin Receptor Signaling
0.250873	1.134	black	Integrin Signaling
0	NA	black	Intrinsic Prothrombin Activation Pathway
0.641642	NA	black	Iron homeostasis signaling pathway
0.0573878	NA	black	Isoleucine Degradation I
0	NA	black	JAK/Stat Signaling
0.46795	NA	black	Ketogenesis
0.138524	NA	black	Ketolysis
0	NA	black	L-carnitine Biosynthesis
0.251513	NA	black	L-cysteine Degradation I
0	NA	black	L-cysteine Degradation II
1.27557	NA	black	L-cysteine Degradation III
0	NA	black	L-DOPA Degradation
0	NA	black	L-serine Degradation
0	NA	black	Lactose Degradation III
0.46795	NA	black	Lanosterol Biosynthesis
0	NA	black	Leptin Signaling in Obesity
0	NA	black	Leucine Degradation I
0	0	black	Leukocyte Extravasation Signaling
0	NA	black	Lipid Antigen Presentation by CD1
0	NA	black	LPS-stimulated MAPK Signaling
0.862507	-1	black	LPS/IL-1 Mediated Inhibition of RXR Function
0.01039	NA	black	LXR/RXR Activation
0	NA	black	Lymphotoxin Î² Receptor Signaling
0	NA	black	Lysine Degradation II
0	NA	black	Lysine Degradation V
0	NA	black	Macropinocytosis Signaling
0	NA	black	Mechanisms of Viral Exit from Host Cells
0	NA	black	Melanocyte Development and Pigmentation Signaling
0	NA	black	Melanoma Signaling
0	NA	black	Melatonin Degradation II
0	NA	black	Melatonin Signaling
0	NA	black	Methionine Degradation I (to Homocysteine)
0	NA	black	Methionine Salvage II (Mammalian)
0	NA	black	Methylglyoxal Degradation III
0	NA	black	Methylglyoxal Degradation VI
0	NA	black	Methylmalonyl Pathway
0.38571	NA	black	Mevalonate Pathway I
0	NA	black	MIF-mediated Glucocorticoid Regulation
0	NA	black	MIF Regulation of Innate Immunity
0	NA	black	Mineralocorticoid Biosynthesis
0	NA	black	Mitochondrial Dysfunction
0.0391583	NA	black	Mitotic Roles of Polo-Like Kinase
0	NA	black	Molecular Mechanisms of Cancer
0	NA	black	Mouse Embryonic Stem Cell Pluripotency
0.0559069	NA	black	MSP-RON Signaling Pathway
0.138524	1.342	black	mTOR Signaling
0	NA	black	Myc Mediated Apoptosis Signaling
0	NA	black	Myo-inositol Biosynthesis
0	NA	black	NAD Biosynthesis from 2-amino-3-carboxymuconate Semialdehyde
0	NA	black	NAD biosynthesis II (from tryptophan)
0	NA	black	NAD Biosynthesis III
0.0559069	NA	black	NAD Salvage Pathway II
0	NA	black	NAD Salvage Pathway III
0	NA	black	NADH Repair
0	NA	black	Natural Killer Cell Signaling
0.0332727	1	black	Necroptosis Signaling Pathway
0	NA	black	Netrin Signaling
0	NA	black	Neuregulin Signaling
0	NA	black	Neuroinflammation Signaling Pathway
0.0537011	NA	black	Neuropathic Pain Signaling In Dorsal Horn Neurons
0	NA	black	Neurotrophin/TRK Signaling
0	NA	black	NF-ÎºB Activation by Viruses
0	NA	black	NF-ÎºB Signaling
0	NA	black	NGF Signaling
0	NA	black	Nitric Oxide Signaling in the Cardiovascular System
0.251513	NA	black	nNOS Signaling in Neurons
0	NA	black	Non-Small Cell Lung Cancer Signaling
0.0180218	NA	black	Noradrenaline and Adrenaline Degradation
0.194859	NA	black	NRF2-mediated Oxidative Stress Response
0.118405	NA	black	Nucleotide Excision Repair Pathway
0	NA	black	Oleate Biosynthesis II (Animals)
0	NA	black	Oncostatin M Signaling
0	0	black	Opioid Signaling Pathway
0.118405	-1.342	black	Osteoarthritis Pathway
0	NA	black	Ovarian Cancer Signaling
0.0573878	NA	black	Oxidative Ethanol Degradation III
0	NA	black	Oxidative Phosphorylation
0	NA	black	Oxidized GTP and dGTP Detoxification
0	NA	black	P2Y Purigenic Receptor Signaling Pathway
0.0180218	NA	black	p38 MAPK Signaling
0	NA	black	p53 Signaling
0.0573878	NA	black	p70S6K Signaling
0.0573878	NA	black	PAK Signaling
0	NA	black	Pancreatic Adenocarcinoma Signaling
0.0966066	NA	black	Paxillin Signaling
0	NA	black	PCP pathway
0	NA	black	PD-1, PD-L1 cancer immunotherapy pathway
0	NA	black	PDGF Signaling
0	NA	black	PEDF Signaling
0.998825	NA	black	Pentose Phosphate Pathway
0.727298	NA	black	Pentose Phosphate Pathway (Non-oxidative Branch)
0	NA	black	PFKFB4 Signaling Pathway
0	NA	black	Phagosome Formation
0.729444	NA	black	Phagosome Maturation
0	NA	black	Phenylalanine Degradation I (Aerobic)
0.0588405	NA	black	Phenylalanine Degradation IV (Mammalian, via Side Chain)
0	NA	black	Phenylethylamine Degradation I
0	NA	black	Phosphatidylglycerol Biosynthesis II (Non-plastidic)
0	0	black	Phospholipase C Signaling
0.0559069	NA	black	Phospholipases
0	NA	black	PI3K Signaling in B Lymphocytes
0.111716	2	black	PI3K/AKT Signaling
0	NA	black	PKCÎ¸ Signaling in T Lymphocytes
0.251513	NA	black	Polyamine Regulation in Colon Cancer
0	NA	black	PPAR Signaling
0	NA	black	PPARÎ±/RXRÎ± Activation
0.0764892	NA	black	Pregnenolone Biosynthesis
0	NA	black	Primary Immunodeficiency Signaling
0.0480076	0.447	black	Production of Nitric Oxide and Reactive Oxygen Species in Macrophages
0	NA	black	Prolactin Signaling
0.111716	NA	black	Prostanoid Biosynthesis
0	NA	black	Prostate Cancer Signaling
0	0.816	black	Protein Kinase A Signaling
0.354309	NA	black	Protein Ubiquitination Pathway
0	NA	black	PTEN Signaling
0.46795	NA	black	Purine Nucleotides De Novo Biosynthesis II
0.0573878	NA	black	Purine Nucleotides Degradation II (Aerobic)
0.194859	NA	black	Purine Ribonucleosides Degradation to Ribose-1-phosphate
0	NA	black	Putrescine Biosynthesis III
0.0573878	NA	black	Putrescine Degradation III
0	NA	black	PXR/RXR Activation
0.0377381	NA	black	Pyridoxal 5'-phosphate Salvage Pathway
0	NA	black	Pyrimidine Deoxyribonucleotides De Novo Biosynthesis I
0	NA	black	Pyrimidine Ribonucleotides De Novo Biosynthesis
0	NA	black	Pyrimidine Ribonucleotides Interconversion
0	NA	black	Pyruvate Fermentation to Lactate
0	NA	black	Rac Signaling
0.727298	NA	black	RAN Signaling
0	NA	black	RANK Signaling in Osteoclasts
0.22634	NA	black	Rapoport-Luebering Glycolytic Shunt
0	NA	black	RAR Activation
0	NA	black	Reelin Signaling in Neurons
0.183498	NA	black	Regulation of Actin-based Motility by Rho
0.131172	NA	black	Regulation of Cellular Mechanics by Calpain Protease
0.46795	NA	black	Regulation of eIF4 and p70S6K Signaling
0	NA	black	Regulation of IL-2 Expression in Activated and Anergic T Lymphocytes
0	NA	black	Regulation of the Epithelial-Mesenchymal Transition Pathway
0	NA	black	Relaxin Signaling
0.118405	NA	black	Remodeling of Epithelial Adherens Junctions
0	NA	black	Renal Cell Carcinoma Signaling
0	NA	black	Renin-Angiotensin Signaling
0.00644816	NA	black	Retinoate Biosynthesis I
0.312061	NA	black	Retinol Biosynthesis
0	NA	black	RhoA Signaling
0	NA	black	RhoGDI Signaling
0.0573878	NA	black	Role of CHK Proteins in Cell Cycle Checkpoint Control
0	NA	black	Role of JAK1 and JAK3 in Î³c Cytokine Signaling
0.0120354	NA	black	Role of Macrophages, Fibroblasts and Endothelial Cells in Rheumatoid Arthritis
0	NA	black	Role of MAPK Signaling in the Pathogenesis of Influenza
0	NA	black	Role of NANOG in Mammalian Embryonic Stem Cell Pluripotency
0	NA	black	Role of NFAT in Cardiac Hypertrophy
0	NA	black	Role of NFAT in Regulation of the Immune Response
0	NA	black	Role of Oct4 in Mammalian Embryonic Stem Cell Pluripotency
0.0573878	NA	black	Role of Osteoblasts, Osteoclasts and Chondrocytes in Rheumatoid Arthritis
0.0224407	NA	black	Role of p14/p19ARF in Tumor Suppression
0	NA	black	Role of Pattern Recognition Receptors in Recognition of Bacteria and Viruses
0.0224407	NA	black	Role of PKR in Interferon Induction and Antiviral Response
0	NA	black	Role of Tissue Factor in Cancer
0	NA	black	Role of Wnt/GSK-3Î² Signaling in the Pathogenesis of Influenza
0	NA	black	S-adenosyl-L-methionine Biosynthesis
0.336149	NA	black	S-methyl-5-thio-Î±-D-ribose 1-phosphate Degradation
0	NA	black	Salvage Pathways of Pyrimidine Ribonucleotides
0	NA	black	SAPK/JNK Signaling
0.0573878	NA	black	Semaphorin Signaling in Neurons
0.0435304	0.378	black	Senescence Pathway
0	NA	black	Serine Biosynthesis
0	NA	black	Serotonin Degradation
0	NA	black	Serotonin Receptor Signaling
0.0559069	NA	black	Sertoli Cell-Sertoli Cell Junction Signaling
0	NA	black	Signaling by Rho Family GTPases
0.0573878	0	black	Sirtuin Signaling Pathway
0	NA	black	Small Cell Lung Cancer Signaling
0.46795	NA	black	Sorbitol Degradation I
0	NA	black	Sperm Motility
0	NA	black	Sphingosine-1-phosphate Signaling
0	NA	black	SPINK1 General Cancer Pathway
0.0573878	NA	black	SPINK1 Pancreatic Cancer Pathway
0	NA	black	Spliceosomal Cycle
0.0573878	NA	black	STAT3 Pathway
0	NA	black	Stearate Biosynthesis I (Animals)
0	NA	black	Sulfite Oxidation IV
0	NA	black	Sumoylation Pathway
0.520189	NA	black	Superoxide Radicals Degradation
1.27557	-2.236	black	Superpathway of Cholesterol Biosynthesis
0	NA	black	Superpathway of D-myo-inositol (1,4,5)-trisphosphate Metabolism
0.727298	NA	black	Superpathway of Geranylgeranyldiphosphate Biosynthesis I (via Mevalonate)
0	NA	black	Superpathway of Methionine Degradation
0	NA	black	Superpathway of Serine and Glycine Biosynthesis I
0	1	black	Synaptic Long Term Depression
0.0764892	-0.707	black	Synaptogenesis Signaling Pathway
0	NA	black	Systemic Lupus Erythematosus In B Cell Signaling Pathway
0	-1	black	Systemic Lupus Erythematosus In T Cell Signaling Pathway
0	NA	black	Systemic Lupus Erythematosus Signaling
0	NA	black	T Cell Exhaustion Signaling Pathway
0	NA	black	T Cell Receptor Signaling
0	NA	black	T Helper Cell Differentiation
0	NA	black	Taurine Biosynthesis
0	NA	black	TCA Cycle II (Eukaryotic)
0	NA	black	Tec Kinase Signaling
0	NA	black	Telomerase Signaling
0.22634	NA	black	Tetrapyrrole Biosynthesis II
0	NA	black	TGF-Î² Signaling
0	NA	black	Th1 Pathway
0.0573878	NA	black	The Visual Cycle
0.46795	NA	black	Thio-molybdenum Cofactor Biosynthesis
0.46795	NA	black	Threonine Degradation II
0	NA	black	Thrombin Signaling
0	NA	black	Thrombopoietin Signaling
0	NA	black	Thymine Degradation
0	NA	black	Thyroid Cancer Signaling
0.38571	NA	black	Tight Junction Signaling
0	NA	black	TNFR1 Signaling
0	NA	black	Toll-like Receptor Signaling
0	NA	black	TR/RXR Activation
0	NA	black	TREM1 Signaling
0	NA	black	Triacylglycerol Biosynthesis
0.0912695	NA	black	Triacylglycerol Degradation
0	NA	black	tRNA Charging
0	NA	black	tRNA Splicing
0.250873	NA	black	Tryptophan Degradation III (Eukaryotic)
0	NA	black	Tryptophan Degradation to 2-amino-3-carboxymuconate Semialdehyde
0.0573878	NA	black	Tryptophan Degradation X (Mammalian, via Tryptamine)
0	NA	black	Type I Diabetes Mellitus Signaling
0	NA	black	Tyrosine Biosynthesis IV
0	NA	black	Tyrosine Degradation I
0	NA	black	UDP-N-acetyl-D-galactosamine Biosynthesis I
0.194859	NA	black	UDP-N-acetyl-D-glucosamine Biosynthesis II
0.0573878	NA	black	Unfolded protein response
0	NA	black	Uracil Degradation II (Reductive)
0.0764892	NA	black	Urate Biosynthesis/Inosine 5'-phosphate Degradation
0.0559069	NA	black	UVA-Induced MAPK Signaling
0	NA	black	UVB-Induced MAPK Signaling
0	NA	black	UVC-Induced MAPK Signaling
0	NA	black	Valine Degradation I
0	NA	black	VDR/RXR Activation
0	NA	black	VEGF Family Ligand-Receptor Interactions
0	NA	black	VEGF Signaling
0	NA	black	Virus Entry via Endocytic Pathways
0	NA	black	Wnt/Ca+ pathway
0.0573878	0	black	Wnt/Î²-catenin Signaling
0.46795	NA	black	Xanthine and Xanthosine Salvage
0.354309	-0.707	black	Xenobiotic Metabolism CAR Signaling Pathway
0	NA	black	Xenobiotic Metabolism General Signaling Pathway
0.111716	-0.816	black	Xenobiotic Metabolism PXR Signaling Pathway
0.167677	NA	black	Xenobiotic Metabolism Signaling
0.334111	-0.905	blue	14-3-3-mediated Signaling
0	NA	blue	1D-myo-inositol Hexakisphosphate Biosynthesis II (Mammalian)
0.467458	NA	blue	2-ketoglutarate Dehydrogenase Complex
0.20646	NA	blue	2-oxobutanoate Degradation I
0.243248	NA	blue	4-aminobutyrate Degradation I
0	NA	blue	Acetate Conversion to Acetyl-CoA
0.196738	NA	blue	Acetyl-CoA Biosynthesis I (Pyruvate Dehydrogenase Complex)
0.369881	-0.471	blue	Actin Cytoskeleton Signaling
0	NA	blue	Actin Nucleation by ARP-WASP Complex
0.215372	0.707	blue	Acute Phase Response Signaling
0	NA	blue	Acyl-CoA Hydrolysis
0	NA	blue	Acyl Carrier Protein Metabolism
0	NA	blue	Adenine and Adenosine Salvage I
0	NA	blue	Adenine and Adenosine Salvage III
0	NA	blue	Adenine and Adenosine Salvage VI
0	NA	blue	Adenosine Nucleotides Degradation II
0.125144	NA	blue	Adipogenesis pathway
0.334111	0.5	blue	Adrenomedullin signaling pathway
0.319272	NA	blue	Agranulocyte Adhesion and Diapedesis
0.141681	1	blue	Agrin Interactions at Neuromuscular Junction
0	NA	blue	Airway Pathology in Chronic Obstructive Pulmonary Disease
0	NA	blue	Alanine Biosynthesis II
0	NA	blue	Alanine Biosynthesis III
0	NA	blue	Alanine Degradation III
0.243248	0	blue	Aldosterone Signaling in Epithelial Cells
0	NA	blue	Altered T Cell and B Cell Signaling in Rheumatoid Arthritis
0.243248	-0.905	blue	AMPK Signaling
0.331333	NA	blue	Amyloid Processing
0.128952	0.447	blue	Amyotrophic Lateral Sclerosis Signaling
0	NA	blue	Androgen Biosynthesis
0.20646	0	blue	Androgen Signaling
0	NA	blue	Angiopoietin Signaling
0.319934	0.333	blue	Antioxidant Action of Vitamin C
0.20646	-1	blue	Antiproliferative Role of Somatostatin Receptor 2
0.243248	1	blue	Antiproliferative Role of TOB in T Cell Signaling
0.243248	-0.378	blue	Apelin Adipocyte Signaling Pathway
0.334111	1	blue	Apelin Cardiomyocyte Signaling Pathway
0.217506	1	blue	Apelin Endothelial Signaling Pathway
0	NA	blue	Apelin Liver Signaling Pathway
0.196738	NA	blue	Apelin Muscle Signaling Pathway
0	NA	blue	April Mediated Signaling
0	NA	blue	Arginine Biosynthesis IV
0	NA	blue	Arsenate Detoxification I (Glutaredoxin)
0.334111	-0.707	blue	Aryl Hydrocarbon Receptor Signaling
0	NA	blue	Aspartate Biosynthesis
0	NA	blue	Assembly of RNA Polymerase I Complex
0	NA	blue	Atherosclerosis Signaling
0	1.342	blue	ATM Signaling
0	NA	blue	Autophagy
0.196738	NA	blue	Axonal Guidance Signaling
0	NA	blue	B Cell Activating Factor Signaling
0	-1	blue	B Cell Receptor Signaling
0.141681	NA	blue	BAG2 Signaling Pathway
0	NA	blue	Basal Cell Carcinoma Signaling
0	NA	blue	BER pathway
0	NA	blue	BEX2 Signaling Pathway
0	NA	blue	Bile Acid Biosynthesis, Neutral Pathway
0	NA	blue	Biotin-carboxyl Carrier Protein Assembly
0.128952	NA	blue	Bladder Cancer Signaling
0.334111	0	blue	BMP signaling pathway
0.215372	NA	blue	Branched-chain Î±-keto acid Dehydrogenase Complex
0	NA	blue	Breast Cancer Regulation by Stathmin1
0	NA	blue	Calcium-induced T Lymphocyte Apoptosis
0.243248	0	blue	Calcium Signaling
0.481176	NA	blue	Calcium Transport I
0.632413	0.688	blue	cAMP-mediated signaling
0.20646	NA	blue	Cancer Drug Resistance By Drug Efflux
0.20646	-1.069	blue	Cardiac Hypertrophy Signaling
0.265693	0.18	blue	Cardiac Hypertrophy Signaling (Enhanced)
0.481176	1.667	blue	Cardiac Î²-adrenergic Signaling
0	NA	blue	Caveolar-mediated Endocytosis Signaling
0	NA	blue	CCR3 Signaling in Eosinophils
0	NA	blue	CCR5 Signaling in Macrophages
0.243248	-1.342	blue	CD27 Signaling in Lymphocytes
0	0.447	blue	CD28 Signaling in T Helper Cells
0	NA	blue	CD40 Signaling
0	0.816	blue	Cdc42 Signaling
0	0.447	blue	CDK5 Signaling
0.190297	NA	blue	CDP-diacylglycerol Biosynthesis I
0.369881	0.816	blue	Cell Cycle: G1/S Checkpoint Regulation
0.331333	0.816	blue	Cell Cycle: G2/M DNA Damage Checkpoint Regulation
0.259732	NA	blue	Cellular Effects of Sildenafil (Viagra)
0	NA	blue	Ceramide Signaling
0	2	blue	Chemokine Signaling
0	1	blue	Cholecystokinin/Gastrin-mediated Signaling
0	NA	blue	Cholesterol Biosynthesis I
0	NA	blue	Cholesterol Biosynthesis II (via 24,25-dihydrolanosterol)
0	NA	blue	Cholesterol Biosynthesis III (via Desmosterol)
0	NA	blue	Chondroitin and Dermatan Biosynthesis
0	NA	blue	Chondroitin Sulfate Biosynthesis (Late Stages)
0.334111	NA	blue	Chondroitin Sulfate Degradation (Metazoa)
0.246991	NA	blue	Chronic Myeloid Leukemia Signaling
0.196738	NA	blue	Clathrin-mediated Endocytosis Signaling
0	NA	blue	CMP-N-acetylneuraminate Biosynthesis I (Eukaryotes)
0.153398	0	blue	CNTF Signaling
0.189996	NA	blue	Coagulation System
0.243248	NA	blue	Coenzyme A Biosynthesis
0.217506	NA	blue	Colanic Acid Building Blocks Biosynthesis
0.196738	-0.302	blue	Colorectal Cancer Metastasis Signaling
0	NA	blue	Communication between Innate and Adaptive Immune Cells
0.0676257	NA	blue	Complement System
0.380645	0.832	blue	Corticotropin Releasing Hormone Signaling
0	NA	blue	Creatine-phosphate Biosynthesis
0	NA	blue	Crosstalk between Dendritic Cells and Natural Killer Cells
0	NA	blue	CTLA4 Signaling in Cytotoxic T Lymphocytes
0	0.816	blue	CXCR4 Signaling
0.196738	NA	blue	Cyclins and Cell Cycle Regulation
0.243248	NA	blue	Cysteine Biosynthesis III (mammalia)
0	NA	blue	D-glucuronate Degradation I
0	NA	blue	D-mannose Degradation
0	NA	blue	D-myo-inositol (1,3,4)-trisphosphate Biosynthesis
0	NA	blue	D-myo-inositol (1,4,5)-trisphosphate Degradation
0.243248	0.905	blue	D-myo-inositol (1,4,5,6)-Tetrakisphosphate Biosynthesis
0.243248	0.905	blue	D-myo-inositol (3,4,5,6)-tetrakisphosphate Biosynthesis
0.0828838	-0.447	blue	Death Receptor Signaling
0.331333	0.258	blue	Dendritic Cell Maturation
0.334111	NA	blue	Dermatan Sulfate Degradation (Metazoa)
0	NA	blue	Diphthamide Biosynthesis
0	NA	blue	DNA damage-induced 14-3-3Ïƒ Signaling
0	NA	blue	Dolichol and Dolichyl Phosphate Biosynthesis
0.129516	NA	blue	Dolichyl-diphosphooligosaccharide Biosynthesis
0.331333	-0.577	blue	Dopamine-DARPP32 Feedback in cAMP Signaling
0.334111	0	blue	Dopamine Degradation
0	1	blue	Dopamine Receptor Signaling
0	NA	blue	dTMP De Novo Biosynthesis
0	NA	blue	EGF Signaling
0	NA	blue	Eicosanoid Signaling
0.481176	0.277	blue	EIF2 Signaling
0.481176	0.258	blue	Endocannabinoid Cancer Inhibition Pathway
0.380385	-1.265	blue	Endocannabinoid Developing Neuron Pathway
0.481176	-1.069	blue	Endocannabinoid Neuronal Synapse Pathway
0.20646	0	blue	Endometrial Cancer Signaling
0.259732	NA	blue	Endoplasmic Reticulum Stress Pathway
0.332723	0	blue	Endothelin-1 Signaling
0.243248	-0.302	blue	eNOS Signaling
0.334111	2.449	blue	Ephrin B Signaling
0.62095	0.535	blue	Ephrin Receptor Signaling
0	NA	blue	Epithelial Adherens Junction Signaling
0	0.447	blue	ErbB Signaling
0.196738	0	blue	ErbB2-ErbB3 Signaling
0.190297	0	blue	ErbB4 Signaling
0.246991	0	blue	ERK/MAPK Signaling
0.334111	-2.121	blue	ERK5 Signaling
0.141681	NA	blue	Erythropoietin Signaling
0.153398	-1	blue	Estrogen-Dependent Breast Cancer Signaling
0.157275	NA	blue	Estrogen Biosynthesis
0.426074	0.192	blue	Estrogen Receptor Signaling
0.331333	0	blue	Ethanol Degradation II
0.196738	NA	blue	Ethanol Degradation IV
0.215372	NA	blue	Eumelanin Biosynthesis
0.217506	-1.508	blue	Factors Promoting Cardiogenesis in Vertebrates
0	NA	blue	FAK Signaling
0.118418	NA	blue	FAT10 Cancer Signaling Pathway
0	NA	blue	FAT10 Signaling Pathway
0.331333	NA	blue	Fatty Acid Î±-oxidation
0.110869	NA	blue	Fatty Acid Î²-oxidation I
0	NA	blue	Fatty Acid Î²-oxidation III (Unsaturated, Odd Number)
0	0.447	blue	Fc Epsilon RI Signaling
0.196738	0.378	blue	FcÎ³ Receptor-mediated Phagocytosis in Macrophages and Monocytes
0	NA	blue	FcÎ³RIIB Signaling in B Lymphocytes
0.259732	-0.707	blue	FGF Signaling
0.196738	0	blue	FLT3 Signaling in Hematopoietic Progenitor Cells
0.215372	1.414	blue	fMLP Signaling in Neutrophils
0	NA	blue	Folate Polyglutamylation
0	NA	blue	Folate Transformations I
0	NA	blue	FXR/RXR Activation
0.334111	NA	blue	G-Protein Coupled Receptor Signaling
0.243248	0	blue	G Beta Gamma Signaling
0.20646	NA	blue	G Protein Signaling Mediated by Tubby
0	NA	blue	GABA Receptor Signaling
0.20646	NA	blue	Galactose Degradation I (Leloir Pathway)
0.279176	NA	blue	Gap Junction Signaling
0.20646	0	blue	GDNF Family Ligand-Receptor Interactions
0	NA	blue	GDP-L-fucose Biosynthesis II (from L-fucose)
0.196738	NA	blue	GDP-mannose Biosynthesis
0	NA	blue	Geranylgeranyldiphosphate Biosynthesis
0	NA	blue	Germ Cell-Sertoli Cell Junction Signaling
0.193212	1	blue	GÎ±12/13 Signaling
0.259732	0	blue	GÎ±i Signaling
0	0.447	blue	GÎ±q Signaling
0.481176	-0.302	blue	GÎ±s Signaling
0.141681	0	blue	Glioblastoma Multiforme Signaling
0	NA	blue	Glioma Invasiveness Signaling
0	NA	blue	Glioma Signaling
0	NA	blue	Glucocorticoid Biosynthesis
0.23677	NA	blue	Glucocorticoid Receptor Signaling
0.141681	NA	blue	Gluconeogenesis I
0	NA	blue	Glutamate Biosynthesis II
0	NA	blue	Glutamate Degradation II
0.20646	NA	blue	Glutamate Degradation III (via 4-aminobutyrate)
0	NA	blue	Glutamate Degradation X
0.331333	NA	blue	Glutamine Biosynthesis I
0.0676257	NA	blue	Glutaryl-CoA Degradation
0	NA	blue	Glutathione Biosynthesis
0	NA	blue	Glutathione Redox Reactions I
0	NA	blue	Glycerol-3-phosphate Shuttle
0	NA	blue	Glycerol Degradation I
0	NA	blue	Glycogen Biosynthesis II (from UDP-D-Glucose)
0	NA	blue	Glycogen Degradation II
0	NA	blue	Glycogen Degradation III
0.243248	NA	blue	Glycolysis I
0	NA	blue	GM-CSF Signaling
0.259732	-0.277	blue	GNRH Signaling
0	NA	blue	GP6 Signaling Pathway
0.467458	0.333	blue	GPCR-Mediated Integration of Enteroendocrine Signaling Exemplified by an L Cell
0.334111	-1.508	blue	GPCR-Mediated Nutrient Sensing in Enteroendocrine Cells
0.128952	NA	blue	Graft-versus-Host Disease Signaling
0.243248	NA	blue	Granulocyte Adhesion and Diapedesis
0	NA	blue	Granzyme A Signaling
0.481176	1	blue	Granzyme B Signaling
0	NA	blue	Guanine and Guanosine Salvage I
0	NA	blue	Guanosine Nucleotides Degradation III
0.20646	NA	blue	Gustation Pathway
0.259732	NA	blue	Heme Biosynthesis II
0	NA	blue	Heme Degradation
0.110869	0	blue	Heparan Sulfate Biosynthesis
0.141681	0	blue	Heparan Sulfate Biosynthesis (Late Stages)
0.0958391	NA	blue	Hepatic Cholestasis
0.243248	NA	blue	Hepatic Fibrosis / Hepatic Stellate Cell Activation
0.259732	0.6	blue	Hepatic Fibrosis Signaling Pathway
0	NA	blue	HER-2 Signaling in Breast Cancer
0	NA	blue	Hereditary Breast Cancer Signaling
0.243248	0.378	blue	HGF Signaling
0.196738	NA	blue	HIF1Î± Signaling
0.334111	-0.447	blue	HIPPO signaling
0.243248	NA	blue	Histamine Degradation
0	0.447	blue	HMGB1 Signaling
0	-0.378	blue	HOTAIR Regulatory Pathway
0.20646	-0.447	blue	Huntington's Disease Signaling
0.259732	-1	blue	Hypoxia Signaling in the Cardiovascular System
0.243248	NA	blue	Î±-Adrenergic Signaling
0	NA	blue	Î±-tocopherol Degradation
0.118873	NA	blue	Î³-glutamyl Cycle
0.057194	NA	blue	Î³-linolenate Biosynthesis II (Animals)
0	NA	blue	iCOS-iCOSL Signaling in T Helper Cells
0.481176	-0.707	blue	IGF-1 Signaling
0.150626	NA	blue	IL-1 Signaling
0	NA	blue	IL-10 Signaling
0	NA	blue	IL-12 Signaling and Production in Macrophages
0.170341	-1.414	blue	IL-15 Production
0.143542	1.342	blue	IL-15 Signaling
0	NA	blue	IL-17 Signaling
0	NA	blue	IL-17A Signaling in Gastric Cells
0	NA	blue	IL-2 Signaling
0.20646	0	blue	IL-23 Signaling Pathway
0	1	blue	IL-3 Signaling
0	NA	blue	IL-4 Signaling
0	1.342	blue	IL-6 Signaling
0.215372	0.577	blue	IL-8 Signaling
0.125144	-0.302	blue	ILK Signaling
0.246991	0	blue	Induction of Apoptosis by HIV1
0	NA	blue	Inflammasome pathway
0.0958391	NA	blue	Inhibition of Angiogenesis by TSP1
0.20646	0.333	blue	Inhibition of ARE-Mediated mRNA Degradation Pathway
0	NA	blue	Inhibition of Matrix Metalloproteases
0	NA	blue	iNOS Signaling
0	NA	blue	Inosine-5'-phosphate Biosynthesis II
0.20646	-0.632	blue	Insulin Receptor Signaling
0.118873	0.632	blue	Integrin Signaling
0.145144	NA	blue	Intrinsic Prothrombin Activation Pathway
0.366702	NA	blue	Iron homeostasis signaling pathway
0.0792664	NA	blue	Isoleucine Degradation I
0	1	blue	JAK/Stat Signaling
0	NA	blue	Ketogenesis
0.157275	NA	blue	Ketolysis
0.243248	NA	blue	L-carnitine Biosynthesis
0	NA	blue	L-cysteine Degradation I
0.331333	NA	blue	L-cysteine Degradation II
0	NA	blue	L-cysteine Degradation III
0.259732	NA	blue	L-DOPA Degradation
0	NA	blue	L-serine Degradation
0	NA	blue	Lactose Degradation III
0	NA	blue	Lanosterol Biosynthesis
0.632413	-1	blue	Leptin Signaling in Obesity
0	NA	blue	Leucine Degradation I
0.334111	1.155	blue	Leukocyte Extravasation Signaling
0.153398	NA	blue	Lipid Antigen Presentation by CD1
0.116251	1	blue	LPS-stimulated MAPK Signaling
0	NA	blue	LPS/IL-1 Mediated Inhibition of RXR Function
0	-1.342	blue	LXR/RXR Activation
0.228352	1	blue	Lymphotoxin Î² Receptor Signaling
0	NA	blue	Lysine Degradation II
0	NA	blue	Lysine Degradation V
0	NA	blue	Macropinocytosis Signaling
0.278722	NA	blue	Mechanisms of Viral Exit from Host Cells
0.274243	0	blue	Melanocyte Development and Pigmentation Signaling
0.190576	0	blue	Melanoma Signaling
0	NA	blue	Melatonin Degradation II
0.967898	-0.632	blue	Melatonin Signaling
0.190297	NA	blue	Methionine Degradation I (to Homocysteine)
0	NA	blue	Methionine Salvage II (Mammalian)
0.101847	NA	blue	Methylglyoxal Degradation III
0	NA	blue	Methylglyoxal Degradation VI
0	NA	blue	Methylmalonyl Pathway
0	NA	blue	Mevalonate Pathway I
0.0796064	NA	blue	MIF-mediated Glucocorticoid Regulation
0	NA	blue	MIF Regulation of Innate Immunity
0	NA	blue	Mineralocorticoid Biosynthesis
0.213182	NA	blue	Mitochondrial Dysfunction
0	NA	blue	Mitotic Roles of Polo-Like Kinase
0.331333	NA	blue	Molecular Mechanisms of Cancer
0.168433	0.378	blue	Mouse Embryonic Stem Cell Pluripotency
0	NA	blue	MSP-RON Signaling Pathway
0.243248	0	blue	mTOR Signaling
0.331333	0.816	blue	Myc Mediated Apoptosis Signaling
0	NA	blue	Myo-inositol Biosynthesis
0.20646	NA	blue	NAD Biosynthesis from 2-amino-3-carboxymuconate Semialdehyde
0.118873	NA	blue	NAD biosynthesis II (from tryptophan)
0.215372	NA	blue	NAD Biosynthesis III
0.174367	NA	blue	NAD Salvage Pathway II
0.20646	NA	blue	NAD Salvage Pathway III
0	NA	blue	NADH Repair
0.155897	0.905	blue	Natural Killer Cell Signaling
0.20646	-0.302	blue	Necroptosis Signaling Pathway
0	NA	blue	Netrin Signaling
0.137038	-0.447	blue	Neuregulin Signaling
0	-0.277	blue	Neuroinflammation Signaling Pathway
0.259732	-1	blue	Neuropathic Pain Signaling In Dorsal Horn Neurons
0.481176	-1.265	blue	Neurotrophin/TRK Signaling
0	NA	blue	NF-ÎºB Activation by Viruses
0	-1	blue	NF-ÎºB Signaling
0.218822	-1	blue	NGF Signaling
0.481176	-0.302	blue	Nitric Oxide Signaling in the Cardiovascular System
0	NA	blue	nNOS Signaling in Neurons
0.153398	0	blue	Non-Small Cell Lung Cancer Signaling
0.396174	0.447	blue	Noradrenaline and Adrenaline Degradation
0.168433	0.632	blue	NRF2-mediated Oxidative Stress Response
0.0739612	NA	blue	Nucleotide Excision Repair Pathway
0	NA	blue	Oleate Biosynthesis II (Animals)
0.20646	1	blue	Oncostatin M Signaling
0.366702	0	blue	Opioid Signaling Pathway
0.157275	0.832	blue	Osteoarthritis Pathway
0.20646	0	blue	Ovarian Cancer Signaling
0.215372	NA	blue	Oxidative Ethanol Degradation III
0.243248	-1	blue	Oxidative Phosphorylation
0	NA	blue	Oxidized GTP and dGTP Detoxification
0.62095	-1.069	blue	P2Y Purigenic Receptor Signaling Pathway
0.116251	-0.378	blue	p38 MAPK Signaling
0	NA	blue	p53 Signaling
0.481176	0.577	blue	p70S6K Signaling
0	1	blue	PAK Signaling
0.967898	0.302	blue	Pancreatic Adenocarcinoma Signaling
0	NA	blue	Paxillin Signaling
0	NA	blue	PCP pathway
0.104377	0.816	blue	PD-1, PD-L1 cancer immunotherapy pathway
0.101847	0.447	blue	PDGF Signaling
0	NA	blue	PEDF Signaling
0.129516	NA	blue	Pentose Phosphate Pathway
0.196738	NA	blue	Pentose Phosphate Pathway (Non-oxidative Branch)
0.62095	-0.707	blue	PFKFB4 Signaling Pathway
0	NA	blue	Phagosome Formation
0.243248	NA	blue	Phagosome Maturation
0	NA	blue	Phenylalanine Degradation I (Aerobic)
0	NA	blue	Phenylalanine Degradation IV (Mammalian, via Side Chain)
0.215372	NA	blue	Phenylethylamine Degradation I
0.160061	NA	blue	Phosphatidylglycerol Biosynthesis II (Non-plastidic)
0.196738	0.302	blue	Phospholipase C Signaling
0.334111	-0.378	blue	Phospholipases
0.207213	-0.333	blue	PI3K Signaling in B Lymphocytes
0.259732	0	blue	PI3K/AKT Signaling
0	0	blue	PKCÎ¸ Signaling in T Lymphocytes
0	NA	blue	Polyamine Regulation in Colon Cancer
0	-1.342	blue	PPAR Signaling
0.62095	-0.577	blue	PPARÎ±/RXRÎ± Activation
0.243248	NA	blue	Pregnenolone Biosynthesis
0	NA	blue	Primary Immunodeficiency Signaling
0	-0.816	blue	Production of Nitric Oxide and Reactive Oxygen Species in Macrophages
0.118418	-0.447	blue	Prolactin Signaling
0	NA	blue	Prostanoid Biosynthesis
0.243248	NA	blue	Prostate Cancer Signaling
0.481176	0	blue	Protein Kinase A Signaling
0.481176	NA	blue	Protein Ubiquitination Pathway
0.196738	0.333	blue	PTEN Signaling
0.118873	NA	blue	Purine Nucleotides De Novo Biosynthesis II
0	NA	blue	Purine Nucleotides Degradation II (Aerobic)
0	NA	blue	Purine Ribonucleosides Degradation to Ribose-1-phosphate
0	NA	blue	Putrescine Biosynthesis III
0.20646	NA	blue	Putrescine Degradation III
0.243248	NA	blue	PXR/RXR Activation
0.319934	0.378	blue	Pyridoxal 5'-phosphate Salvage Pathway
0	NA	blue	Pyrimidine Deoxyribonucleotides De Novo Biosynthesis I
0.141681	NA	blue	Pyrimidine Ribonucleotides De Novo Biosynthesis
0.153398	NA	blue	Pyrimidine Ribonucleotides Interconversion
0.20646	NA	blue	Pyruvate Fermentation to Lactate
0.138579	1.134	blue	Rac Signaling
0.057194	NA	blue	RAN Signaling
0.101847	-0.447	blue	RANK Signaling in Osteoclasts
0	NA	blue	Rapoport-Luebering Glycolytic Shunt
0.632413	NA	blue	RAR Activation
0.259732	1.508	blue	Reelin Signaling in Neurons
0	NA	blue	Regulation of Actin-based Motility by Rho
0.116251	NA	blue	Regulation of Cellular Mechanics by Calpain Protease
0.20646	NA	blue	Regulation of eIF4 and p70S6K Signaling
0.157275	NA	blue	Regulation of IL-2 Expression in Activated and Anergic T Lymphocytes
0.112312	NA	blue	Regulation of the Epithelial-Mesenchymal Transition Pathway
0.467458	0	blue	Relaxin Signaling
0.243248	NA	blue	Remodeling of Epithelial Adherens Junctions
0.129007	1	blue	Renal Cell Carcinoma Signaling
0.174367	1.134	blue	Renin-Angiotensin Signaling
0.259732	-1	blue	Retinoate Biosynthesis I
0	NA	blue	Retinol Biosynthesis
0	0.816	blue	RhoA Signaling
0.30885	0	blue	RhoGDI Signaling
0	NA	blue	Role of CHK Proteins in Cell Cycle Checkpoint Control
0.103441	NA	blue	Role of JAK1 and JAK3 in Î³c Cytokine Signaling
0.23899	NA	blue	Role of Macrophages, Fibroblasts and Endothelial Cells in Rheumatoid Arthritis
0	NA	blue	Role of MAPK Signaling in the Pathogenesis of Influenza
0.215372	-0.447	blue	Role of NANOG in Mammalian Embryonic Stem Cell Pluripotency
0.215372	-0.577	blue	Role of NFAT in Cardiac Hypertrophy
0	2.449	blue	Role of NFAT in Regulation of the Immune Response
0.20646	NA	blue	Role of Oct4 in Mammalian Embryonic Stem Cell Pluripotency
0	NA	blue	Role of Osteoblasts, Osteoclasts and Chondrocytes in Rheumatoid Arthritis
0	NA	blue	Role of p14/p19ARF in Tumor Suppression
0.0921664	0	blue	Role of Pattern Recognition Receptors in Recognition of Bacteria and Viruses
0	0.447	blue	Role of PKR in Interferon Induction and Antiviral Response
0	NA	blue	Role of Tissue Factor in Cancer
0	NA	blue	Role of Wnt/GSK-3Î² Signaling in the Pathogenesis of Influenza
0	NA	blue	S-adenosyl-L-methionine Biosynthesis
0	NA	blue	S-methyl-5-thio-Î±-D-ribose 1-phosphate Degradation
0.196738	0.378	blue	Salvage Pathways of Pyrimidine Ribonucleotides
0.112312	-0.816	blue	SAPK/JNK Signaling
0	NA	blue	Semaphorin Signaling in Neurons
0.199696	1.213	blue	Senescence Pathway
0	NA	blue	Serine Biosynthesis
0.259732	0	blue	Serotonin Degradation
0	NA	blue	Serotonin Receptor Signaling
0.243248	NA	blue	Sertoli Cell-Sertoli Cell Junction Signaling
0.243248	1.069	blue	Signaling by Rho Family GTPases
0.143542	-0.535	blue	Sirtuin Signaling Pathway
0.157275	NA	blue	Small Cell Lung Cancer Signaling
0	NA	blue	Sorbitol Degradation I
0.243248	0.333	blue	Sperm Motility
0.217506	0	blue	Sphingosine-1-phosphate Signaling
0.128952	1	blue	SPINK1 General Cancer Pathway
0.157275	0	blue	SPINK1 Pancreatic Cancer Pathway
0	NA	blue	Spliceosomal Cycle
0	0	blue	STAT3 Pathway
0.118418	NA	blue	Stearate Biosynthesis I (Animals)
0	NA	blue	Sulfite Oxidation IV
0.259732	1.89	blue	Sumoylation Pathway
0	NA	blue	Superoxide Radicals Degradation
0	NA	blue	Superpathway of Cholesterol Biosynthesis
0	NA	blue	Superpathway of D-myo-inositol (1,4,5)-trisphosphate Metabolism
0	NA	blue	Superpathway of Geranylgeranyldiphosphate Biosynthesis I (via Mevalonate)
0.243248	1	blue	Superpathway of Methionine Degradation
0	NA	blue	Superpathway of Serine and Glycine Biosynthesis I
0.178799	0.302	blue	Synaptic Long Term Depression
0.62095	0.378	blue	Synaptogenesis Signaling Pathway
0	0	blue	Systemic Lupus Erythematosus In B Cell Signaling Pathway
0.20646	1.291	blue	Systemic Lupus Erythematosus In T Cell Signaling Pathway
0	NA	blue	Systemic Lupus Erythematosus Signaling
0.118873	0.333	blue	T Cell Exhaustion Signaling Pathway
0	NA	blue	T Cell Receptor Signaling
0.0958391	NA	blue	T Helper Cell Differentiation
0	NA	blue	Taurine Biosynthesis
0.153398	NA	blue	TCA Cycle II (Eukaryotic)
0	NA	blue	Tec Kinase Signaling
0.157275	1.342	blue	Telomerase Signaling
0.369881	NA	blue	Tetrapyrrole Biosynthesis II
0.259732	1.134	blue	TGF-Î² Signaling
0	1	blue	Th1 Pathway
0	NA	blue	The Visual Cycle
0	NA	blue	Thio-molybdenum Cofactor Biosynthesis
0	NA	blue	Threonine Degradation II
0.331333	-0.535	blue	Thrombin Signaling
0	NA	blue	Thrombopoietin Signaling
0	NA	blue	Thymine Degradation
0	NA	blue	Thyroid Cancer Signaling
0.20646	NA	blue	Tight Junction Signaling
0.196738	1	blue	TNFR1 Signaling
0	NA	blue	Toll-like Receptor Signaling
0	NA	blue	TR/RXR Activation
0	NA	blue	TREM1 Signaling
0	NA	blue	Triacylglycerol Biosynthesis
0	NA	blue	Triacylglycerol Degradation
0.157304	NA	blue	tRNA Charging
0.259732	0.447	blue	tRNA Splicing
0	NA	blue	Tryptophan Degradation III (Eukaryotic)
0	NA	blue	Tryptophan Degradation to 2-amino-3-carboxymuconate Semialdehyde
0.196738	NA	blue	Tryptophan Degradation X (Mammalian, via Tryptamine)
0.0921664	-0.447	blue	Type I Diabetes Mellitus Signaling
0	NA	blue	Tyrosine Biosynthesis IV
0	NA	blue	Tyrosine Degradation I
0	NA	blue	UDP-N-acetyl-D-galactosamine Biosynthesis I
0	NA	blue	UDP-N-acetyl-D-glucosamine Biosynthesis II
0.157275	-2	blue	Unfolded protein response
0	NA	blue	Uracil Degradation II (Reductive)
0	NA	blue	Urate Biosynthesis/Inosine 5'-phosphate Degradation
0	-0.447	blue	UVA-Induced MAPK Signaling
0	NA	blue	UVB-Induced MAPK Signaling
0.0937424	NA	blue	UVC-Induced MAPK Signaling
0.196738	NA	blue	Valine Degradation I
0	NA	blue	VDR/RXR Activation
0.215372	1.134	blue	VEGF Family Ligand-Receptor Interactions
0.465789	0.707	blue	VEGF Signaling
0	NA	blue	Virus Entry via Endocytic Pathways
0.331333	-1.134	blue	Wnt/Ca+ pathway
0.118418	0.378	blue	Wnt/Î²-catenin Signaling
0	NA	blue	Xanthine and Xanthosine Salvage
0	0.378	blue	Xenobiotic Metabolism CAR Signaling Pathway
0	-1.134	blue	Xenobiotic Metabolism General Signaling Pathway
0	0.378	blue	Xenobiotic Metabolism PXR Signaling Pathway
0	NA	blue	Xenobiotic Metabolism Signaling
1.74228	-1.155	brown	14-3-3-mediated Signaling
0.148476	NA	brown	1D-myo-inositol Hexakisphosphate Biosynthesis II (Mammalian)
0	NA	brown	2-ketoglutarate Dehydrogenase Complex
0	NA	brown	2-oxobutanoate Degradation I
0.565085	NA	brown	4-aminobutyrate Degradation I
0.484839	NA	brown	Acetate Conversion to Acetyl-CoA
0.379747	NA	brown	Acetyl-CoA Biosynthesis I (Pyruvate Dehydrogenase Complex)
1.68215	1	brown	Actin Cytoskeleton Signaling
1.34423	0	brown	Actin Nucleation by ARP-WASP Complex
0.274948	-1.265	brown	Acute Phase Response Signaling
0.217936	NA	brown	Acyl-CoA Hydrolysis
0	NA	brown	Acyl Carrier Protein Metabolism
0	NA	brown	Adenine and Adenosine Salvage I
0	NA	brown	Adenine and Adenosine Salvage III
0.836149	NA	brown	Adenine and Adenosine Salvage VI
0	NA	brown	Adenosine Nucleotides Degradation II
1.66092	NA	brown	Adipogenesis pathway
0.825502	-1.604	brown	Adrenomedullin signaling pathway
0	NA	brown	Agranulocyte Adhesion and Diapedesis
0.692123	-1.134	brown	Agrin Interactions at Neuromuscular Junction
0	NA	brown	Airway Pathology in Chronic Obstructive Pulmonary Disease
0	NA	brown	Alanine Biosynthesis II
0.836149	NA	brown	Alanine Biosynthesis III
0	NA	brown	Alanine Degradation III
0.572254	0	brown	Aldosterone Signaling in Epithelial Cells
0	NA	brown	Altered T Cell and B Cell Signaling in Rheumatoid Arthritis
1.68215	0.243	brown	AMPK Signaling
0.667865	NA	brown	Amyloid Processing
1.89742	0.277	brown	Amyotrophic Lateral Sclerosis Signaling
0	NA	brown	Androgen Biosynthesis
0.58612	NA	brown	Androgen Signaling
0.981123	0	brown	Angiopoietin Signaling
0	2.236	brown	Antioxidant Action of Vitamin C
1.54734	0	brown	Antiproliferative Role of Somatostatin Receptor 2
0.615885	1	brown	Antiproliferative Role of TOB in T Cell Signaling
0.891083	-0.707	brown	Apelin Adipocyte Signaling Pathway
0.179283	-1.342	brown	Apelin Cardiomyocyte Signaling Pathway
1.25322	-0.577	brown	Apelin Endothelial Signaling Pathway
0.908931	-1	brown	Apelin Liver Signaling Pathway
0.405667	NA	brown	Apelin Muscle Signaling Pathway
0.331185	NA	brown	April Mediated Signaling
0	NA	brown	Arginine Biosynthesis IV
0	NA	brown	Arsenate Detoxification I (Glutaredoxin)
0.907414	-0.816	brown	Aryl Hydrocarbon Receptor Signaling
0	NA	brown	Aspartate Biosynthesis
0	NA	brown	Assembly of RNA Polymerase I Complex
0.260961	NA	brown	Atherosclerosis Signaling
1.06904	-0.632	brown	ATM Signaling
0	NA	brown	Autophagy
1.30659	NA	brown	Axonal Guidance Signaling
0.313196	NA	brown	B Cell Activating Factor Signaling
0.493286	-0.577	brown	B Cell Receptor Signaling
0	NA	brown	BAG2 Signaling Pathway
0	NA	brown	Basal Cell Carcinoma Signaling
0.217936	NA	brown	BER pathway
0.667865	-0.378	brown	BEX2 Signaling Pathway
0.206659	NA	brown	Bile Acid Biosynthesis, Neutral Pathway
0	NA	brown	Biotin-carboxyl Carrier Protein Assembly
2.1041	0	brown	Bladder Cancer Signaling
1.89742	-1.732	brown	BMP signaling pathway
0.484839	NA	brown	Branched-chain Î±-keto acid Dehydrogenase Complex
0.667865	NA	brown	Breast Cancer Regulation by Stathmin1
0	NA	brown	Calcium-induced T Lymphocyte Apoptosis
0.373925	-1.633	brown	Calcium Signaling
1.23827	NA	brown	Calcium Transport I
0.428942	-1.155	brown	cAMP-mediated signaling
1.04245	NA	brown	Cancer Drug Resistance By Drug Efflux
2.1041	-1.706	brown	Cardiac Hypertrophy Signaling
0.981123	-1.768	brown	Cardiac Hypertrophy Signaling (Enhanced)
1.05798	0.333	brown	Cardiac Î²-adrenergic Signaling
0.204639	NA	brown	Caveolar-mediated Endocytosis Signaling
1.89742	-0.632	brown	CCR3 Signaling in Eosinophils
0.508652	-1.342	brown	CCR5 Signaling in Macrophages
0.20818	NA	brown	CD27 Signaling in Lymphocytes
0.310014	-1.134	brown	CD28 Signaling in T Helper Cells
0.667865	-0.816	brown	CD40 Signaling
0	-1	brown	Cdc42 Signaling
2.1041	0.258	brown	CDK5 Signaling
0.127287	NA	brown	CDP-diacylglycerol Biosynthesis I
1.98126	-0.378	brown	Cell Cycle: G1/S Checkpoint Regulation
0.955762	0.447	brown	Cell Cycle: G2/M DNA Damage Checkpoint Regulation
0	NA	brown	Cellular Effects of Sildenafil (Viagra)
1.23827	0	brown	Ceramide Signaling
0.927616	0	brown	Chemokine Signaling
1.41078	-0.832	brown	Cholecystokinin/Gastrin-mediated Signaling
0.206659	NA	brown	Cholesterol Biosynthesis I
0.206659	NA	brown	Cholesterol Biosynthesis II (via 24,25-dihydrolanosterol)
0.206659	NA	brown	Cholesterol Biosynthesis III (via Desmosterol)
0	NA	brown	Chondroitin and Dermatan Biosynthesis
0	NA	brown	Chondroitin Sulfate Biosynthesis (Late Stages)
0.543952	NA	brown	Chondroitin Sulfate Degradation (Metazoa)
2.18692	NA	brown	Chronic Myeloid Leukemia Signaling
2.86916	NA	brown	Clathrin-mediated Endocytosis Signaling
0	NA	brown	CMP-N-acetylneuraminate Biosynthesis I (Eukaryotes)
1.06904	0.378	brown	CNTF Signaling
0.185135	NA	brown	Coagulation System
0	NA	brown	Coenzyme A Biosynthesis
0.981123	NA	brown	Colanic Acid Building Blocks Biosynthesis
1.25927	-1.886	brown	Colorectal Cancer Metastasis Signaling
0	NA	brown	Communication between Innate and Adaptive Immune Cells
0	NA	brown	Complement System
0.174578	-1.342	brown	Corticotropin Releasing Hormone Signaling
0.428928	NA	brown	Creatine-phosphate Biosynthesis
0	NA	brown	Crosstalk between Dendritic Cells and Natural Killer Cells
0.37811	NA	brown	CTLA4 Signaling in Cytotoxic T Lymphocytes
2.18692	-1.698	brown	CXCR4 Signaling
2.18692	0.333	brown	Cyclins and Cell Cycle Regulation
0.667865	NA	brown	Cysteine Biosynthesis III (mammalia)
0	NA	brown	D-glucuronate Degradation I
0	NA	brown	D-mannose Degradation
0.148476	NA	brown	D-myo-inositol (1,3,4)-trisphosphate Biosynthesis
0.160851	NA	brown	D-myo-inositol (1,4,5)-trisphosphate Degradation
0.428928	-1.667	brown	D-myo-inositol (1,4,5,6)-Tetrakisphosphate Biosynthesis
0.428928	-1.667	brown	D-myo-inositol (3,4,5,6)-tetrakisphosphate Biosynthesis
0	NA	brown	Death Receptor Signaling
0	-1.414	brown	Dendritic Cell Maturation
0.508652	NA	brown	Dermatan Sulfate Degradation (Metazoa)
0	NA	brown	Diphthamide Biosynthesis
0.137334	NA	brown	DNA damage-induced 14-3-3Ïƒ Signaling
0	NA	brown	Dolichol and Dolichyl Phosphate Biosynthesis
1.23827	NA	brown	Dolichyl-diphosphooligosaccharide Biosynthesis
0.183181	-1.414	brown	Dopamine-DARPP32 Feedback in cAMP Signaling
0.323887	NA	brown	Dopamine Degradation
0.503108	NA	brown	Dopamine Receptor Signaling
1.05749	NA	brown	dTMP De Novo Biosynthesis
0.583014	-0.447	brown	EGF Signaling
0	NA	brown	Eicosanoid Signaling
0.20818	0.333	brown	EIF2 Signaling
0.667865	0.302	brown	Endocannabinoid Cancer Inhibition Pathway
1.72303	-0.832	brown	Endocannabinoid Developing Neuron Pathway
0.347372	-1.89	brown	Endocannabinoid Neuronal Synapse Pathway
1.61165	0	brown	Endometrial Cancer Signaling
0	NA	brown	Endoplasmic Reticulum Stress Pathway
1.07971	-1.807	brown	Endothelin-1 Signaling
0.20818	-0.816	brown	eNOS Signaling
1.89742	-1.414	brown	Ephrin B Signaling
1.91286	-1.5	brown	Ephrin Receptor Signaling
1.34423	NA	brown	Epithelial Adherens Junction Signaling
1.37527	-0.905	brown	ErbB Signaling
0.908931	0.378	brown	ErbB2-ErbB3 Signaling
0.874329	0.378	brown	ErbB4 Signaling
1.56543	0.243	brown	ERK/MAPK Signaling
1.02056	-0.707	brown	ERK5 Signaling
0.950995	NA	brown	Erythropoietin Signaling
1.27452	-0.378	brown	Estrogen-Dependent Breast Cancer Signaling
0.598577	1	brown	Estrogen Biosynthesis
1.29758	-1.961	brown	Estrogen Receptor Signaling
0.269145	NA	brown	Ethanol Degradation II
0.405667	NA	brown	Ethanol Degradation IV
0	NA	brown	Eumelanin Biosynthesis
0.493286	-2.333	brown	Factors Promoting Cardiogenesis in Vertebrates
1.89742	NA	brown	FAK Signaling
0.714963	-0.447	brown	FAT10 Cancer Signaling Pathway
0.148476	NA	brown	FAT10 Signaling Pathway
0.171456	NA	brown	Fatty Acid Î±-oxidation
1.91286	-0.378	brown	Fatty Acid Î²-oxidation I
1.34423	NA	brown	Fatty Acid Î²-oxidation III (Unsaturated, Odd Number)
1.21414	-0.577	brown	Fc Epsilon RI Signaling
0.329608	-2.449	brown	FcÎ³ Receptor-mediated Phagocytosis in Macrophages and Monocytes
0.974935	-0.707	brown	FcÎ³RIIB Signaling in B Lymphocytes
1.05749	-1	brown	FGF Signaling
1.39862	0	brown	FLT3 Signaling in Hematopoietic Progenitor Cells
1.23827	-0.905	brown	fMLP Signaling in Neutrophils
0.428928	NA	brown	Folate Polyglutamylation
0.285464	NA	brown	Folate Transformations I
0	NA	brown	FXR/RXR Activation
0.493286	NA	brown	G-Protein Coupled Receptor Signaling
0.906574	-1.508	brown	G Beta Gamma Signaling
0.79251	NA	brown	G Protein Signaling Mediated by Tubby
0.487766	NA	brown	GABA Receptor Signaling
0	NA	brown	Galactose Degradation I (Leloir Pathway)
0.979028	NA	brown	Gap Junction Signaling
1.77496	-0.632	brown	GDNF Family Ligand-Receptor Interactions
0	NA	brown	GDP-L-fucose Biosynthesis II (from L-fucose)
0.379747	NA	brown	GDP-mannose Biosynthesis
0	NA	brown	Geranylgeranyldiphosphate Biosynthesis
2.10877	NA	brown	Germ Cell-Sertoli Cell Junction Signaling
0.997378	0	brown	GÎ±12/13 Signaling
0.667865	0.333	brown	GÎ±i Signaling
0.901358	-1.155	brown	GÎ±q Signaling
1.14846	-1.265	brown	GÎ±s Signaling
0.80302	-1.387	brown	Glioblastoma Multiforme Signaling
1.02056	-0.707	brown	Glioma Invasiveness Signaling
2.18692	-0.333	brown	Glioma Signaling
0	NA	brown	Glucocorticoid Biosynthesis
0.667865	NA	brown	Glucocorticoid Receptor Signaling
2.17613	-1.134	brown	Gluconeogenesis I
0	NA	brown	Glutamate Biosynthesis II
0	NA	brown	Glutamate Degradation II
0.428928	NA	brown	Glutamate Degradation III (via 4-aminobutyrate)
0	NA	brown	Glutamate Degradation X
0	NA	brown	Glutamine Biosynthesis I
0.884098	NA	brown	Glutaryl-CoA Degradation
0.565085	NA	brown	Glutathione Biosynthesis
0.667865	NA	brown	Glutathione Redox Reactions I
0.667865	NA	brown	Glycerol-3-phosphate Shuttle
0.428928	NA	brown	Glycerol Degradation I
0.874329	NA	brown	Glycogen Biosynthesis II (from UDP-D-Glucose)
0.667865	NA	brown	Glycogen Degradation II
0.583014	NA	brown	Glycogen Degradation III
1.38382	-1.342	brown	Glycolysis I
1.05749	0.378	brown	GM-CSF Signaling
0.583014	-1.732	brown	GNRH Signaling
0.438961	-0.707	brown	GP6 Signaling Pathway
0.20818	-2	brown	GPCR-Mediated Integration of Enteroendocrine Signaling Exemplified by an L Cell
0.329608	-2.646	brown	GPCR-Mediated Nutrient Sensing in Enteroendocrine Cells
0	NA	brown	Graft-versus-Host Disease Signaling
0	NA	brown	Granulocyte Adhesion and Diapedesis
0.451714	NA	brown	Granzyme A Signaling
0	NA	brown	Granzyme B Signaling
0	NA	brown	Guanine and Guanosine Salvage I
0	NA	brown	Guanosine Nucleotides Degradation III
0	NA	brown	Gustation Pathway
0	NA	brown	Heme Biosynthesis II
0	NA	brown	Heme Degradation
0	NA	brown	Heparan Sulfate Biosynthesis
0.168678	NA	brown	Heparan Sulfate Biosynthesis (Late Stages)
0	NA	brown	Hepatic Cholestasis
1.08789	NA	brown	Hepatic Fibrosis / Hepatic Stellate Cell Activation
0.820274	-1.225	brown	Hepatic Fibrosis Signaling Pathway
0.606114	NA	brown	HER-2 Signaling in Breast Cancer
2.18692	NA	brown	Hereditary Breast Cancer Signaling
0.667865	-0.333	brown	HGF Signaling
2.18692	NA	brown	HIF1Î± Signaling
1.05749	0.816	brown	HIPPO signaling
0.583014	NA	brown	Histamine Degradation
0.66865	-0.905	brown	HMGB1 Signaling
0	-1.89	brown	HOTAIR Regulatory Pathway
0.890039	-1.265	brown	Huntington's Disease Signaling
1.89742	NA	brown	Hypoxia Signaling in the Cardiovascular System
1.89742	0	brown	Î±-Adrenergic Signaling
0	NA	brown	Î±-tocopherol Degradation
0.238842	NA	brown	Î³-glutamyl Cycle
0.451714	NA	brown	Î³-linolenate Biosynthesis II (Animals)
0.242346	-1	brown	iCOS-iCOSL Signaling in T Helper Cells
1.41069	-0.632	brown	IGF-1 Signaling
1.18288	-1.633	brown	IL-1 Signaling
0	NA	brown	IL-10 Signaling
0.329608	NA	brown	IL-12 Signaling and Production in Macrophages
0	-1	brown	IL-15 Production
0.974935	0	brown	IL-15 Signaling
1.3795	NA	brown	IL-17 Signaling
0.598577	NA	brown	IL-17A Signaling in Gastric Cells
0.981123	0.378	brown	IL-2 Signaling
0	NA	brown	IL-23 Signaling Pathway
1.14707	-0.333	brown	IL-3 Signaling
0.842981	NA	brown	IL-4 Signaling
1.05931	0	brown	IL-6 Signaling
1.71645	-0.688	brown	IL-8 Signaling
1.26278	-1.069	brown	ILK Signaling
0.306932	-1	brown	Induction of Apoptosis by HIV1
0.127287	NA	brown	Inflammasome pathway
1.06997	-0.447	brown	Inhibition of Angiogenesis by TSP1
0.697637	-0.632	brown	Inhibition of ARE-Mediated mRNA Degradation Pathway
0.168417	NA	brown	Inhibition of Matrix Metalloproteases
0	NA	brown	iNOS Signaling
0	NA	brown	Inosine-5'-phosphate Biosynthesis II
1.34423	0.535	brown	Insulin Receptor Signaling
1.91286	-1.213	brown	Integrin Signaling
0.313196	NA	brown	Intrinsic Prothrombin Activation Pathway
0.461366	NA	brown	Iron homeostasis signaling pathway
0.927616	NA	brown	Isoleucine Degradation I
0.667865	0.378	brown	JAK/Stat Signaling
0	NA	brown	Ketogenesis
0	NA	brown	Ketolysis
0	NA	brown	L-carnitine Biosynthesis
0	NA	brown	L-cysteine Degradation I
0.836149	NA	brown	L-cysteine Degradation II
0	NA	brown	L-cysteine Degradation III
0.667865	NA	brown	L-DOPA Degradation
0	NA	brown	L-serine Degradation
0	NA	brown	Lactose Degradation III
0	NA	brown	Lanosterol Biosynthesis
0.344364	0	brown	Leptin Signaling in Obesity
0.285464	NA	brown	Leucine Degradation I
0.533135	-2.309	brown	Leukocyte Extravasation Signaling
0	NA	brown	Lipid Antigen Presentation by CD1
1.34423	-0.632	brown	LPS-stimulated MAPK Signaling
0.310014	0.447	brown	LPS/IL-1 Mediated Inhibition of RXR Function
0	NA	brown	LXR/RXR Activation
0	NA	brown	Lymphotoxin Î² Receptor Signaling
0	NA	brown	Lysine Degradation II
0	NA	brown	Lysine Degradation V
1.22524	0.378	brown	Macropinocytosis Signaling
0.313196	NA	brown	Mechanisms of Viral Exit from Host Cells
1.35292	-0.905	brown	Melanocyte Development and Pigmentation Signaling
1.89742	-0.333	brown	Melanoma Signaling
0	NA	brown	Melatonin Degradation II
0	NA	brown	Melatonin Signaling
0.379747	NA	brown	Methionine Degradation I (to Homocysteine)
0	NA	brown	Methionine Salvage II (Mammalian)
0	NA	brown	Methylglyoxal Degradation III
0	NA	brown	Methylglyoxal Degradation VI
0	NA	brown	Methylmalonyl Pathway
0	NA	brown	Mevalonate Pathway I
0	NA	brown	MIF-mediated Glucocorticoid Regulation
0.543378	-2	brown	MIF Regulation of Innate Immunity
0	NA	brown	Mineralocorticoid Biosynthesis
1.54734	NA	brown	Mitochondrial Dysfunction
0.276208	NA	brown	Mitotic Roles of Polo-Like Kinase
1.74228	NA	brown	Molecular Mechanisms of Cancer
1.23094	0.302	brown	Mouse Embryonic Stem Cell Pluripotency
0.171492	NA	brown	MSP-RON Signaling Pathway
1.05749	0	brown	mTOR Signaling
0.21957	NA	brown	Myc Mediated Apoptosis Signaling
0	NA	brown	Myo-inositol Biosynthesis
0	NA	brown	NAD Biosynthesis from 2-amino-3-carboxymuconate Semialdehyde
0	NA	brown	NAD biosynthesis II (from tryptophan)
0	NA	brown	NAD Biosynthesis III
0	NA	brown	NAD Salvage Pathway II
0	NA	brown	NAD Salvage Pathway III
0	NA	brown	NADH Repair
0.21124	-0.632	brown	Natural Killer Cell Signaling
1.91286	-1.414	brown	Necroptosis Signaling Pathway
0.26294	-1	brown	Netrin Signaling
0.323566	0.447	brown	Neuregulin Signaling
0	-0.905	brown	Neuroinflammation Signaling Pathway
0	-1	brown	Neuropathic Pain Signaling In Dorsal Horn Neurons
0.692123	0.378	brown	Neurotrophin/TRK Signaling
0.431243	0	brown	NF-ÎºB Activation by Viruses
0.991135	-1.291	brown	NF-ÎºB Signaling
1.51176	-0.577	brown	NGF Signaling
0.667865	-0.707	brown	Nitric Oxide Signaling in the Cardiovascular System
0.26294	NA	brown	nNOS Signaling in Neurons
1.89742	-0.333	brown	Non-Small Cell Lung Cancer Signaling
0.228405	NA	brown	Noradrenaline and Adrenaline Degradation
2.18692	-0.535	brown	NRF2-mediated Oxidative Stress Response
0.667865	NA	brown	Nucleotide Excision Repair Pathway
0.26294	NA	brown	Oleate Biosynthesis II (Animals)
0.791497	0.447	brown	Oncostatin M Signaling
0.175481	-1.155	brown	Opioid Signaling Pathway
0	0.378	brown	Osteoarthritis Pathway
1.54734	0	brown	Ovarian Cancer Signaling
0.508652	NA	brown	Oxidative Ethanol Degradation III
1.90618	-3.207	brown	Oxidative Phosphorylation
0	NA	brown	Oxidized GTP and dGTP Detoxification
0.857016	-0.632	brown	P2Y Purigenic Receptor Signaling Pathway
0.182979	0	brown	p38 MAPK Signaling
0.446171	0.447	brown	p53 Signaling
1.72303	0.277	brown	p70S6K Signaling
1.33734	-0.905	brown	PAK Signaling
1.34423	0.333	brown	Pancreatic Adenocarcinoma Signaling
1.66092	-1.387	brown	Paxillin Signaling
0.306932	-1	brown	PCP pathway
0	0	brown	PD-1, PD-L1 cancer immunotherapy pathway
1.27406	-0.632	brown	PDGF Signaling
1.66092	-0.302	brown	PEDF Signaling
0.26294	NA	brown	Pentose Phosphate Pathway
0.379747	NA	brown	Pentose Phosphate Pathway (Non-oxidative Branch)
0.714963	-1	brown	PFKFB4 Signaling Pathway
0	NA	brown	Phagosome Formation
1.05749	NA	brown	Phagosome Maturation
0	NA	brown	Phenylalanine Degradation I (Aerobic)
0	NA	brown	Phenylalanine Degradation IV (Mammalian, via Side Chain)
0.484839	NA	brown	Phenylethylamine Degradation I
0	NA	brown	Phosphatidylglycerol Biosynthesis II (Non-plastidic)
0.790487	-1.291	brown	Phospholipase C Signaling
0	NA	brown	Phospholipases
0.755441	-1	brown	PI3K Signaling in B Lymphocytes
1.23326	0	brown	PI3K/AKT Signaling
0	-0.378	brown	PKCÎ¸ Signaling in T Lymphocytes
0	NA	brown	Polyamine Regulation in Colon Cancer
0.790487	-1	brown	PPAR Signaling
1.34423	-1.213	brown	PPARÎ±/RXRÎ± Activation
0	NA	brown	Pregnenolone Biosynthesis
0	NA	brown	Primary Immunodeficiency Signaling
0.598577	0	brown	Production of Nitric Oxide and Reactive Oxygen Species in Macrophages
0.858721	0	brown	Prolactin Signaling
0	NA	brown	Prostanoid Biosynthesis
1.22526	NA	brown	Prostate Cancer Signaling
0.667865	-0.655	brown	Protein Kinase A Signaling
4.20274	NA	brown	Protein Ubiquitination Pathway
1.51176	0.277	brown	PTEN Signaling
0	NA	brown	Purine Nucleotides De Novo Biosynthesis II
0	NA	brown	Purine Nucleotides Degradation II (Aerobic)
0	NA	brown	Purine Ribonucleosides Degradation to Ribose-1-phosphate
0	NA	brown	Putrescine Biosynthesis III
0.160851	NA	brown	Putrescine Degradation III
0	NA	brown	PXR/RXR Activation
0	NA	brown	Pyridoxal 5'-phosphate Salvage Pathway
0.667865	NA	brown	Pyrimidine Deoxyribonucleotides De Novo Biosynthesis I
0.306932	NA	brown	Pyrimidine Ribonucleotides De Novo Biosynthesis
0.323887	NA	brown	Pyrimidine Ribonucleotides Interconversion
1.05749	NA	brown	Pyruvate Fermentation to Lactate
0.329608	0.378	brown	Rac Signaling
0.451714	NA	brown	RAN Signaling
1.01419	-1	brown	RANK Signaling in Osteoclasts
1.05749	NA	brown	Rapoport-Luebering Glycolytic Shunt
0.543203	NA	brown	RAR Activation
0.667865	-1.265	brown	Reelin Signaling in Neurons
0	NA	brown	Regulation of Actin-based Motility by Rho
1.20579	0.378	brown	Regulation of Cellular Mechanics by Calpain Protease
1.30659	0.302	brown	Regulation of eIF4 and p70S6K Signaling
0.981123	NA	brown	Regulation of IL-2 Expression in Activated and Anergic T Lymphocytes
0.550062	NA	brown	Regulation of the Epithelial-Mesenchymal Transition Pathway
0.981123	-0.707	brown	Relaxin Signaling
0.428928	NA	brown	Remodeling of Epithelial Adherens Junctions
1.72884	0	brown	Renal Cell Carcinoma Signaling
1.41078	-1.387	brown	Renin-Angiotensin Signaling
0	NA	brown	Retinoate Biosynthesis I
0.615885	-2	brown	Retinol Biosynthesis
0.269312	0	brown	RhoA Signaling
0.386299	0.378	brown	RhoGDI Signaling
1.05749	0	brown	Role of CHK Proteins in Cell Cycle Checkpoint Control
0.857016	NA	brown	Role of JAK1 and JAK3 in Î³c Cytokine Signaling
0.428928	NA	brown	Role of Macrophages, Fibroblasts and Endothelial Cells in Rheumatoid Arthritis
1.41078	NA	brown	Role of MAPK Signaling in the Pathogenesis of Influenza
0.981123	0	brown	Role of NANOG in Mammalian Embryonic Stem Cell Pluripotency
1.31492	-1.698	brown	Role of NFAT in Cardiac Hypertrophy
0.825502	-0.302	brown	Role of NFAT in Regulation of the Immune Response
1.36871	NA	brown	Role of Oct4 in Mammalian Embryonic Stem Cell Pluripotency
0.49734	NA	brown	Role of Osteoblasts, Osteoclasts and Chondrocytes in Rheumatoid Arthritis
0.852972	1	brown	Role of p14/p19ARF in Tumor Suppression
0	-1.342	brown	Role of Pattern Recognition Receptors in Recognition of Bacteria and Viruses
0.202106	-1.633	brown	Role of PKR in Interferon Induction and Antiviral Response
0.791177	NA	brown	Role of Tissue Factor in Cancer
0	NA	brown	Role of Wnt/GSK-3Î² Signaling in the Pathogenesis of Influenza
0.565085	NA	brown	S-adenosyl-L-methionine Biosynthesis
0	NA	brown	S-methyl-5-thio-Î±-D-ribose 1-phosphate Degradation
0.195108	-1.342	brown	Salvage Pathways of Pyrimidine Ribonucleotides
2.86916	-1.698	brown	SAPK/JNK Signaling
0.329608	NA	brown	Semaphorin Signaling in Neurons
1.9175	-1.177	brown	Senescence Pathway
0.428928	NA	brown	Serine Biosynthesis
0	NA	brown	Serotonin Degradation
0	NA	brown	Serotonin Receptor Signaling
1.31501	NA	brown	Sertoli Cell-Sertoli Cell Junction Signaling
0.981123	-1.291	brown	Signaling by Rho Family GTPases
1.71484	0	brown	Sirtuin Signaling Pathway
0.791177	0.447	brown	Small Cell Lung Cancer Signaling
0	NA	brown	Sorbitol Degradation I
0.20818	-1.633	brown	Sperm Motility
0.202106	-0.447	brown	Sphingosine-1-phosphate Signaling
0.981123	0.378	brown	SPINK1 General Cancer Pathway
0	NA	brown	SPINK1 Pancreatic Cancer Pathway
0	NA	brown	Spliceosomal Cycle
1.84264	-2	brown	STAT3 Pathway
0.474035	-1	brown	Stearate Biosynthesis I (Animals)
0	NA	brown	Sulfite Oxidation IV
0.598577	-0.378	brown	Sumoylation Pathway
0.311381	NA	brown	Superoxide Radicals Degradation
0	NA	brown	Superpathway of Cholesterol Biosynthesis
0	NA	brown	Superpathway of D-myo-inositol (1,4,5)-trisphosphate Metabolism
0	NA	brown	Superpathway of Geranylgeranyldiphosphate Biosynthesis I (via Mevalonate)
0.395317	NA	brown	Superpathway of Methionine Degradation
0.874329	NA	brown	Superpathway of Serine and Glycine Biosynthesis I
1.07971	-0.775	brown	Synaptic Long Term Depression
0.388787	-1.414	brown	Synaptogenesis Signaling Pathway
0.175026	0.277	brown	Systemic Lupus Erythematosus In B Cell Signaling Pathway
1.05931	-1.414	brown	Systemic Lupus Erythematosus In T Cell Signaling Pathway
0	NA	brown	Systemic Lupus Erythematosus Signaling
0.897293	-0.707	brown	T Cell Exhaustion Signaling Pathway
0.734013	NA	brown	T Cell Receptor Signaling
0	NA	brown	T Helper Cell Differentiation
0	NA	brown	Taurine Biosynthesis
0.624204	NA	brown	TCA Cycle II (Eukaryotic)
0.667865	-1.134	brown	Tec Kinase Signaling
1.70364	0.302	brown	Telomerase Signaling
0	NA	brown	Tetrapyrrole Biosynthesis II
1.33734	-0.632	brown	TGF-Î² Signaling
0	NA	brown	Th1 Pathway
0	NA	brown	The Visual Cycle
0	NA	brown	Thio-molybdenum Cofactor Biosynthesis
0	NA	brown	Threonine Degradation II
1.38974	-0.775	brown	Thrombin Signaling
1.22774	0	brown	Thrombopoietin Signaling
0	NA	brown	Thymine Degradation
1.44365	0	brown	Thyroid Cancer Signaling
0.329608	NA	brown	Tight Junction Signaling
0	NA	brown	TNFR1 Signaling
0.329608	NA	brown	Toll-like Receptor Signaling
0.26294	NA	brown	TR/RXR Activation
0	NA	brown	TREM1 Signaling
0.598577	-1	brown	Triacylglycerol Biosynthesis
0.884098	-2.236	brown	Triacylglycerol Degradation
0	NA	brown	tRNA Charging
0	NA	brown	tRNA Splicing
0.661246	NA	brown	Tryptophan Degradation III (Eukaryotic)
0	NA	brown	Tryptophan Degradation to 2-amino-3-carboxymuconate Semialdehyde
0.137334	NA	brown	Tryptophan Degradation X (Mammalian, via Tryptamine)
0	NA	brown	Type I Diabetes Mellitus Signaling
0	NA	brown	Tyrosine Biosynthesis IV
0.428928	NA	brown	Tyrosine Degradation I
0	NA	brown	UDP-N-acetyl-D-galactosamine Biosynthesis I
1.66092	NA	brown	UDP-N-acetyl-D-glucosamine Biosynthesis II
0.583014	-1	brown	Unfolded protein response
0	NA	brown	Uracil Degradation II (Reductive)
0	NA	brown	Urate Biosynthesis/Inosine 5'-phosphate Degradation
1.31501	-0.378	brown	UVA-Induced MAPK Signaling
1.19687	-0.378	brown	UVB-Induced MAPK Signaling
1.89742	-0.333	brown	UVC-Induced MAPK Signaling
1.72884	-2.236	brown	Valine Degradation I
0	NA	brown	VDR/RXR Activation
1.59403	0.333	brown	VEGF Family Ligand-Receptor Interactions
1.57703	0	brown	VEGF Signaling
0.690624	NA	brown	Virus Entry via Endocytic Pathways
0	NA	brown	Wnt/Ca+ pathway
0.583014	0.333	brown	Wnt/Î²-catenin Signaling
0	NA	brown	Xanthine and Xanthosine Salvage
0.311381	-1.897	brown	Xenobiotic Metabolism CAR Signaling Pathway
1.07971	-0.832	brown	Xenobiotic Metabolism General Signaling Pathway
0.285464	-2.53	brown	Xenobiotic Metabolism PXR Signaling Pathway
0.874329	NA	brown	Xenobiotic Metabolism Signaling
0.417253	-0.447	green	14-3-3-mediated Signaling
0.234319	NA	green	1D-myo-inositol Hexakisphosphate Biosynthesis II (Mammalian)
0.580579	NA	green	2-ketoglutarate Dehydrogenase Complex
2.15824	NA	green	2-oxobutanoate Degradation I
0.640843	NA	green	4-aminobutyrate Degradation I
1.30993	NA	green	Acetate Conversion to Acetyl-CoA
1.07876	NA	green	Acetyl-CoA Biosynthesis I (Pyruvate Dehydrogenase Complex)
0.280378	-1.134	green	Actin Cytoskeleton Signaling
0.265264	NA	green	Actin Nucleation by ARP-WASP Complex
0.711886	-0.447	green	Acute Phase Response Signaling
0.321086	NA	green	Acyl-CoA Hydrolysis
0.84831	NA	green	Acyl Carrier Protein Metabolism
0	NA	green	Adenine and Adenosine Salvage I
0	NA	green	Adenine and Adenosine Salvage III
0	NA	green	Adenine and Adenosine Salvage VI
0	NA	green	Adenosine Nucleotides Degradation II
1.75773	NA	green	Adipogenesis pathway
0.640843	-1.667	green	Adrenomedullin signaling pathway
0	NA	green	Agranulocyte Adhesion and Diapedesis
1.469	-1.342	green	Agrin Interactions at Neuromuscular Junction
0	NA	green	Airway Pathology in Chronic Obstructive Pulmonary Disease
1.77571	NA	green	Alanine Biosynthesis II
0	NA	green	Alanine Biosynthesis III
1.77571	NA	green	Alanine Degradation III
0.281595	NA	green	Aldosterone Signaling in Epithelial Cells
0	NA	green	Altered T Cell and B Cell Signaling in Rheumatoid Arthritis
1.19554	-0.333	green	AMPK Signaling
0.216021	NA	green	Amyloid Processing
0.453593	-0.447	green	Amyotrophic Lateral Sclerosis Signaling
0	NA	green	Androgen Biosynthesis
0.849298	NA	green	Androgen Signaling
0.640843	-1	green	Angiopoietin Signaling
0.403479	NA	green	Antioxidant Action of Vitamin C
0.84831	0	green	Antiproliferative Role of Somatostatin Receptor 2
0.302738	NA	green	Antiproliferative Role of TOB in T Cell Signaling
1.09626	-2.646	green	Apelin Adipocyte Signaling Pathway
0.433878	-2.236	green	Apelin Cardiomyocyte Signaling Pathway
0.508674	-1.633	green	Apelin Endothelial Signaling Pathway
0.438115	NA	green	Apelin Liver Signaling Pathway
0.580579	NA	green	Apelin Muscle Signaling Pathway
0	NA	green	April Mediated Signaling
0	NA	green	Arginine Biosynthesis IV
0.580579	NA	green	Arsenate Detoxification I (Glutaredoxin)
1.35311	0.816	green	Aryl Hydrocarbon Receptor Signaling
0	NA	green	Aspartate Biosynthesis
0	NA	green	Assembly of RNA Polymerase I Complex
0.76453	NA	green	Atherosclerosis Signaling
0	NA	green	ATM Signaling
0.196658	NA	green	Autophagy
0.492415	NA	green	Axonal Guidance Signaling
0	NA	green	B Cell Activating Factor Signaling
0.417253	0	green	B Cell Receptor Signaling
0	NA	green	BAG2 Signaling Pathway
0	NA	green	Basal Cell Carcinoma Signaling
0	NA	green	BER pathway
0.809243	-2.236	green	BEX2 Signaling Pathway
0	NA	green	Bile Acid Biosynthesis, Neutral Pathway
1.469	NA	green	Biotin-carboxyl Carrier Protein Assembly
0.640843	NA	green	Bladder Cancer Signaling
0.364244	-1	green	BMP signaling pathway
1.30993	NA	green	Branched-chain Î±-keto acid Dehydrogenase Complex
0.327108	NA	green	Breast Cancer Regulation by Stathmin1
0.164336	NA	green	Calcium-induced T Lymphocyte Apoptosis
0	NA	green	Calcium Signaling
0	NA	green	Calcium Transport I
0.711886	-3.162	green	cAMP-mediated signaling
0.809243	NA	green	Cancer Drug Resistance By Drug Efflux
0.661404	-1.265	green	Cardiac Hypertrophy Signaling
0.711886	-4.264	green	Cardiac Hypertrophy Signaling (Enhanced)
0.345564	NA	green	Cardiac Î²-adrenergic Signaling
0.248782	NA	green	Caveolar-mediated Endocytosis Signaling
0.640843	NA	green	CCR3 Signaling in Eosinophils
0.304448	NA	green	CCR5 Signaling in Macrophages
0.414342	NA	green	CD27 Signaling in Lymphocytes
0.328007	-2.236	green	CD28 Signaling in T Helper Cells
0	NA	green	CD40 Signaling
0.414342	-1	green	Cdc42 Signaling
0.562539	0	green	CDK5 Signaling
0.905289	NA	green	CDP-diacylglycerol Biosynthesis I
0.297622	NA	green	Cell Cycle: G1/S Checkpoint Regulation
0	NA	green	Cell Cycle: G2/M DNA Damage Checkpoint Regulation
0	NA	green	Cellular Effects of Sildenafil (Viagra)
0.327108	1	green	Ceramide Signaling
0.811741	-0.816	green	Chemokine Signaling
0.321659	-1.342	green	Cholecystokinin/Gastrin-mediated Signaling
1.25561	NA	green	Cholesterol Biosynthesis I
1.25561	NA	green	Cholesterol Biosynthesis II (via 24,25-dihydrolanosterol)
1.25561	NA	green	Cholesterol Biosynthesis III (via Desmosterol)
0	NA	green	Chondroitin and Dermatan Biosynthesis
0	NA	green	Chondroitin Sulfate Biosynthesis (Late Stages)
0	NA	green	Chondroitin Sulfate Degradation (Metazoa)
0.414342	NA	green	Chronic Myeloid Leukemia Signaling
1.70924	NA	green	Clathrin-mediated Endocytosis Signaling
0	NA	green	CMP-N-acetylneuraminate Biosynthesis I (Eukaryotes)
0.60942	-1	green	CNTF Signaling
0.618336	NA	green	Coagulation System
0	NA	green	Coenzyme A Biosynthesis
0.672586	NA	green	Colanic Acid Building Blocks Biosynthesis
0.624433	-2.53	green	Colorectal Cancer Metastasis Signaling
0	NA	green	Communication between Innate and Adaptive Immune Cells
0.321659	NA	green	Complement System
0.216021	NA	green	Corticotropin Releasing Hormone Signaling
0.51915	NA	green	Creatine-phosphate Biosynthesis
0	NA	green	Crosstalk between Dendritic Cells and Natural Killer Cells
0	NA	green	CTLA4 Signaling in Cytotoxic T Lymphocytes
0.659083	-1.633	green	CXCR4 Signaling
0.216021	NA	green	Cyclins and Cell Cycle Regulation
0.84831	NA	green	Cysteine Biosynthesis III (mammalia)
0.640843	NA	green	D-glucuronate Degradation I
0	NA	green	D-mannose Degradation
0.590571	NA	green	D-myo-inositol (1,3,4)-trisphosphate Biosynthesis
0.244548	NA	green	D-myo-inositol (1,4,5)-trisphosphate Degradation
0.234996	-2.236	green	D-myo-inositol (1,4,5,6)-Tetrakisphosphate Biosynthesis
0.234996	-2.236	green	D-myo-inositol (3,4,5,6)-tetrakisphosphate Biosynthesis
0.319612	-1	green	Death Receptor Signaling
0	-1	green	Dendritic Cell Maturation
0	NA	green	Dermatan Sulfate Degradation (Metazoa)
0	NA	green	Diphthamide Biosynthesis
0	NA	green	DNA damage-induced 14-3-3Ïƒ Signaling
0	NA	green	Dolichol and Dolichyl Phosphate Biosynthesis
0	NA	green	Dolichyl-diphosphooligosaccharide Biosynthesis
0.536164	0	green	Dopamine-DARPP32 Feedback in cAMP Signaling
2.69002	-1.633	green	Dopamine Degradation
0.82046	NA	green	Dopamine Receptor Signaling
0.51915	NA	green	dTMP De Novo Biosynthesis
0.622679	-2	green	EGF Signaling
0.307547	NA	green	Eicosanoid Signaling
0.659083	-0.378	green	EIF2 Signaling
0.64273	0	green	Endocannabinoid Cancer Inhibition Pathway
0.84831	-1.414	green	Endocannabinoid Developing Neuron Pathway
0.590333	-2.646	green	Endocannabinoid Neuronal Synapse Pathway
1.11318	-0.447	green	Endometrial Cancer Signaling
0	NA	green	Endoplasmic Reticulum Stress Pathway
0.677026	-2.333	green	Endothelin-1 Signaling
0.418554	-2	green	eNOS Signaling
1.21881	-2.449	green	Ephrin B Signaling
1.34414	-2.714	green	Ephrin Receptor Signaling
1.19554	NA	green	Epithelial Adherens Junction Signaling
0.660572	-0.816	green	ErbB Signaling
1.3608	0	green	ErbB2-ErbB3 Signaling
0.297622	NA	green	ErbB4 Signaling
0	0	green	ERK/MAPK Signaling
0.659083	-1.342	green	ERK5 Signaling
0.414342	NA	green	Erythropoietin Signaling
1.19554	-1.342	green	Estrogen-Dependent Breast Cancer Signaling
0.562539	NA	green	Estrogen Biosynthesis
1.87438	-2.236	green	Estrogen Receptor Signaling
4.07705	-2.121	green	Ethanol Degradation II
3.15517	-1.633	green	Ethanol Degradation IV
0	NA	green	Eumelanin Biosynthesis
0.321659	-2.449	green	Factors Promoting Cardiogenesis in Vertebrates
0.659083	NA	green	FAK Signaling
0.711886	-2	green	FAT10 Cancer Signaling Pathway
0	NA	green	FAT10 Signaling Pathway
1.70924	-1	green	Fatty Acid Î±-oxidation
4.7377	-3	green	Fatty Acid Î²-oxidation I
0.640843	NA	green	Fatty Acid Î²-oxidation III (Unsaturated, Odd Number)
0.321659	-0.447	green	Fc Epsilon RI Signaling
0.164336	NA	green	FcÎ³ Receptor-mediated Phagocytosis in Macrophages and Monocytes
0.417253	-1	green	FcÎ³RIIB Signaling in B Lymphocytes
0.197965	NA	green	FGF Signaling
0.396406	-1	green	FLT3 Signaling in Hematopoietic Progenitor Cells
1.11916	-2.121	green	fMLP Signaling in Neutrophils
1.18984	NA	green	Folate Polyglutamylation
0.84831	NA	green	Folate Transformations I
3.3722	NA	green	FXR/RXR Activation
0.635507	NA	green	G-Protein Coupled Receptor Signaling
1.0288	-2.121	green	G Beta Gamma Signaling
0.393015	NA	green	G Protein Signaling Mediated by Tubby
0	NA	green	GABA Receptor Signaling
0.51915	NA	green	Galactose Degradation I (Leloir Pathway)
0.74713	NA	green	Gap Junction Signaling
0.63029	-1.342	green	GDNF Family Ligand-Receptor Interactions
0	NA	green	GDP-L-fucose Biosynthesis II (from L-fucose)
0.477721	NA	green	GDP-mannose Biosynthesis
0	NA	green	Geranylgeranyldiphosphate Biosynthesis
0.498784	NA	green	Germ Cell-Sertoli Cell Junction Signaling
0.406619	-0.816	green	GÎ±12/13 Signaling
0.97703	-2.121	green	GÎ±i Signaling
0.179835	-2	green	GÎ±q Signaling
0	NA	green	GÎ±s Signaling
0.660572	-0.707	green	Glioblastoma Multiforme Signaling
0.254276	NA	green	Glioma Invasiveness Signaling
0.911071	-0.447	green	Glioma Signaling
0	NA	green	Glucocorticoid Biosynthesis
0.935894	NA	green	Glucocorticoid Receptor Signaling
0.170986	NA	green	Gluconeogenesis I
0	NA	green	Glutamate Biosynthesis II
0	NA	green	Glutamate Degradation II
0.51915	NA	green	Glutamate Degradation III (via 4-aminobutyrate)
0	NA	green	Glutamate Degradation X
0	NA	green	Glutamine Biosynthesis I
1.70924	-2	green	Glutaryl-CoA Degradation
0	NA	green	Glutathione Biosynthesis
0.511196	NA	green	Glutathione Redox Reactions I
0	NA	green	Glycerol-3-phosphate Shuttle
0	NA	green	Glycerol Degradation I
0.435439	NA	green	Glycogen Biosynthesis II (from UDP-D-Glucose)
1.35984	NA	green	Glycogen Degradation II
1.25561	NA	green	Glycogen Degradation III
0	NA	green	Glycolysis I
0.464143	NA	green	GM-CSF Signaling
0.476578	-2.121	green	GNRH Signaling
0.324577	-2.236	green	GP6 Signaling Pathway
0.254276	NA	green	GPCR-Mediated Integration of Enteroendocrine Signaling Exemplified by an L Cell
0	NA	green	GPCR-Mediated Nutrient Sensing in Enteroendocrine Cells
0	NA	green	Graft-versus-Host Disease Signaling
0	NA	green	Granulocyte Adhesion and Diapedesis
0	NA	green	Granzyme A Signaling
0	NA	green	Granzyme B Signaling
0	NA	green	Guanine and Guanosine Salvage I
0	NA	green	Guanosine Nucleotides Degradation III
0	NA	green	Gustation Pathway
0	NA	green	Heme Biosynthesis II
0	NA	green	Heme Degradation
0	NA	green	Heparan Sulfate Biosynthesis
0.166027	NA	green	Heparan Sulfate Biosynthesis (Late Stages)
0	NA	green	Hepatic Cholestasis
0.186576	NA	green	Hepatic Fibrosis / Hepatic Stellate Cell Activation
1.27759	-2.4	green	Hepatic Fibrosis Signaling Pathway
0.722545	NA	green	HER-2 Signaling in Breast Cancer
0.668192	NA	green	Hereditary Breast Cancer Signaling
0.364244	-1.342	green	HGF Signaling
0.886516	NA	green	HIF1Î± Signaling
0	NA	green	HIPPO signaling
1.25561	NA	green	Histamine Degradation
0	-1	green	HMGB1 Signaling
0.168361	-1.342	green	HOTAIR Regulatory Pathway
0.216021	-2	green	Huntington's Disease Signaling
0.871881	NA	green	Hypoxia Signaling in the Cardiovascular System
1.469	-2.121	green	Î±-Adrenergic Signaling
0	NA	green	Î±-tocopherol Degradation
0.336322	NA	green	Î³-glutamyl Cycle
1.04225	NA	green	Î³-linolenate Biosynthesis II (Animals)
0.234996	-1	green	iCOS-iCOSL Signaling in T Helper Cells
0.738122	-1.633	green	IGF-1 Signaling
0.672586	NA	green	IL-1 Signaling
0	NA	green	IL-10 Signaling
0.911071	NA	green	IL-12 Signaling and Production in Macrophages
0.186576	-2	green	IL-15 Production
0.417253	-1	green	IL-15 Signaling
0.389346	NA	green	IL-17 Signaling
0.457716	NA	green	IL-17A Signaling in Gastric Cells
1.09626	-1	green	IL-2 Signaling
0	NA	green	IL-23 Signaling Pathway
1.09626	-1.134	green	IL-3 Signaling
0.580579	NA	green	IL-4 Signaling
0.600745	-0.378	green	IL-6 Signaling
0.730743	-2.53	green	IL-8 Signaling
0.665476	-2.53	green	ILK Signaling
0.164336	NA	green	Induction of Apoptosis by HIV1
0	NA	green	Inflammasome pathway
0.989052	NA	green	Inhibition of Angiogenesis by TSP1
0	NA	green	Inhibition of ARE-Mediated mRNA Degradation Pathway
0	NA	green	Inhibition of Matrix Metalloproteases
0	NA	green	iNOS Signaling
0	NA	green	Inosine-5'-phosphate Biosynthesis II
1.11318	-0.333	green	Insulin Receptor Signaling
0.308848	-1.134	green	Integrin Signaling
0.788801	-1	green	Intrinsic Prothrombin Activation Pathway
0.252486	NA	green	Iron homeostasis signaling pathway
4.85341	-2.646	green	Isoleucine Degradation I
0.590333	-1.342	green	JAK/Stat Signaling
0.755261	NA	green	Ketogenesis
1.67759	NA	green	Ketolysis
1.469	NA	green	L-carnitine Biosynthesis
0	NA	green	L-cysteine Degradation I
0	NA	green	L-cysteine Degradation II
0.711886	NA	green	L-cysteine Degradation III
0	NA	green	L-DOPA Degradation
0	NA	green	L-serine Degradation
0	NA	green	Lactose Degradation III
0	NA	green	Lanosterol Biosynthesis
0.248782	NA	green	Leptin Signaling in Obesity
3.81463	-2.236	green	Leucine Degradation I
0	-2.449	green	Leukocyte Extravasation Signaling
0	NA	green	Lipid Antigen Presentation by CD1
0.369193	-1	green	LPS-stimulated MAPK Signaling
2.41055	1.342	green	LPS/IL-1 Mediated Inhibition of RXR Function
4.06154	-2.53	green	LXR/RXR Activation
0	NA	green	Lymphotoxin Î² Receptor Signaling
2.15824	NA	green	Lysine Degradation II
1.18984	NA	green	Lysine Degradation V
0.234996	NA	green	Macropinocytosis Signaling
0	NA	green	Mechanisms of Viral Exit from Host Cells
0.297622	-1	green	Melanocyte Development and Pigmentation Signaling
0.661404	NA	green	Melanoma Signaling
1.30993	NA	green	Melatonin Degradation II
0.464143	NA	green	Melatonin Signaling
0.905289	NA	green	Methionine Degradation I (to Homocysteine)
0	NA	green	Methionine Salvage II (Mammalian)
0.302738	NA	green	Methylglyoxal Degradation III
0.84831	NA	green	Methylglyoxal Degradation VI
1.30993	NA	green	Methylmalonyl Pathway
0.711886	NA	green	Mevalonate Pathway I
0	NA	green	MIF-mediated Glucocorticoid Regulation
0	NA	green	MIF Regulation of Innate Immunity
0	NA	green	Mineralocorticoid Biosynthesis
12.1858	NA	green	Mitochondrial Dysfunction
0	NA	green	Mitotic Roles of Polo-Like Kinase
0.677026	NA	green	Molecular Mechanisms of Cancer
0.414342	-0.447	green	Mouse Embryonic Stem Cell Pluripotency
0	NA	green	MSP-RON Signaling Pathway
0.216563	NA	green	mTOR Signaling
0	NA	green	Myc Mediated Apoptosis Signaling
0	NA	green	Myo-inositol Biosynthesis
1.18984	NA	green	NAD Biosynthesis from 2-amino-3-carboxymuconate Semialdehyde
1.35984	NA	green	NAD biosynthesis II (from tryptophan)
1.30993	NA	green	NAD Biosynthesis III
0.865915	NA	green	NAD Salvage Pathway II
1.18984	NA	green	NAD Salvage Pathway III
0.640843	NA	green	NADH Repair
0	-0.447	green	Natural Killer Cell Signaling
0.287101	-2.449	green	Necroptosis Signaling Pathway
0	NA	green	Netrin Signaling
1.469	-0.378	green	Neuregulin Signaling
0.22707	-1.897	green	Neuroinflammation Signaling Pathway
0	NA	green	Neuropathic Pain Signaling In Dorsal Horn Neurons
0.414342	NA	green	Neurotrophin/TRK Signaling
0.207522	NA	green	NF-ÎºB Activation by Viruses
0.886516	-2.714	green	NF-ÎºB Signaling
0.341992	-1.342	green	NGF Signaling
0.659083	-2.449	green	Nitric Oxide Signaling in the Cardiovascular System
0.236172	NA	green	nNOS Signaling in Neurons
0.649261	-1	green	Non-Small Cell Lung Cancer Signaling
3.83123	-2.121	green	Noradrenaline and Adrenaline Degradation
0.396406	-1	green	NRF2-mediated Oxidative Stress Response
0	NA	green	Nucleotide Excision Repair Pathway
0.809243	NA	green	Oleate Biosynthesis II (Animals)
0.508674	NA	green	Oncostatin M Signaling
0	-1.633	green	Opioid Signaling Pathway
0.417253	-1.134	green	Osteoarthritis Pathway
1.09619	-1.633	green	Ovarian Cancer Signaling
2.65825	-1.342	green	Oxidative Ethanol Degradation III
9.43362	-4.264	green	Oxidative Phosphorylation
0	NA	green	Oxidized GTP and dGTP Detoxification
0.59552	0	green	P2Y Purigenic Receptor Signaling Pathway
0	NA	green	p38 MAPK Signaling
0.809243	0	green	p53 Signaling
0.583218	-1.89	green	p70S6K Signaling
0.453593	-1.342	green	PAK Signaling
0.926457	-2.646	green	Pancreatic Adenocarcinoma Signaling
0.714457	-1.633	green	Paxillin Signaling
0.164336	NA	green	PCP pathway
0.590333	0.816	green	PD-1, PD-L1 cancer immunotherapy pathway
0.711886	-1.633	green	PDGF Signaling
0.580579	-0.447	green	PEDF Signaling
0	NA	green	Pentose Phosphate Pathway
0	NA	green	Pentose Phosphate Pathway (Non-oxidative Branch)
0	NA	green	PFKFB4 Signaling Pathway
0	NA	green	Phagosome Formation
0	NA	green	Phagosome Maturation
1.30993	NA	green	Phenylalanine Degradation I (Aerobic)
1.84984	-2	green	Phenylalanine Degradation IV (Mammalian, via Side Chain)
0.580579	NA	green	Phenylethylamine Degradation I
0.84831	NA	green	Phosphatidylglycerol Biosynthesis II (Non-plastidic)
0.265264	-1.414	green	Phospholipase C Signaling
0.166027	NA	green	Phospholipases
0.693734	-0.816	green	PI3K Signaling in B Lymphocytes
1.18136	-0.632	green	PI3K/AKT Signaling
0.301687	-1.633	green	PKCÎ¸ Signaling in T Lymphocytes
0.511196	NA	green	Polyamine Regulation in Colon Cancer
1.04225	0	green	PPAR Signaling
1.34414	1.155	green	PPARÎ±/RXRÎ± Activation
0	NA	green	Pregnenolone Biosynthesis
0	NA	green	Primary Immunodeficiency Signaling
0.532723	-1	green	Production of Nitric Oxide and Reactive Oxygen Species in Macrophages
0.581633	-1	green	Prolactin Signaling
0	NA	green	Prostanoid Biosynthesis
1.94898	NA	green	Prostate Cancer Signaling
0.788801	-0.258	green	Protein Kinase A Signaling
0.514756	NA	green	Protein Ubiquitination Pathway
3.87148	1.807	green	PTEN Signaling
0.336322	NA	green	Purine Nucleotides De Novo Biosynthesis II
0	NA	green	Purine Nucleotides Degradation II (Aerobic)
0	NA	green	Purine Ribonucleosides Degradation to Ribose-1-phosphate
0	NA	green	Putrescine Biosynthesis III
2.41055	-1.342	green	Putrescine Degradation III
0.529117	NA	green	PXR/RXR Activation
0	NA	green	Pyridoxal 5'-phosphate Salvage Pathway
0.196077	NA	green	Pyrimidine Deoxyribonucleotides De Novo Biosynthesis I
0	NA	green	Pyrimidine Ribonucleotides De Novo Biosynthesis
0	NA	green	Pyrimidine Ribonucleotides Interconversion
0	NA	green	Pyruvate Fermentation to Lactate
0.357956	-1.342	green	Rac Signaling
0	NA	green	RAN Signaling
0.530852	-2.236	green	RANK Signaling in Osteoclasts
0	NA	green	Rapoport-Luebering Glycolytic Shunt
1.42239	NA	green	RAR Activation
0.265264	-2.236	green	Reelin Signaling in Neurons
0	NA	green	Regulation of Actin-based Motility by Rho
0.51915	-1	green	Regulation of Cellular Mechanics by Calpain Protease
0.417253	NA	green	Regulation of eIF4 and p70S6K Signaling
0.517503	NA	green	Regulation of IL-2 Expression in Activated and Anergic T Lymphocytes
0.368721	NA	green	Regulation of the Epithelial-Mesenchymal Transition Pathway
0.967197	NA	green	Relaxin Signaling
0.505771	NA	green	Remodeling of Epithelial Adherens Junctions
0.809243	NA	green	Renal Cell Carcinoma Signaling
0.321659	-1.342	green	Renin-Angiotensin Signaling
0.364244	NA	green	Retinoate Biosynthesis I
0.302738	NA	green	Retinol Biosynthesis
0	NA	green	RhoA Signaling
0.430518	NA	green	RhoGDI Signaling
0	NA	green	Role of CHK Proteins in Cell Cycle Checkpoint Control
0.711886	NA	green	Role of JAK1 and JAK3 in Î³c Cytokine Signaling
0.493695	NA	green	Role of Macrophages, Fibroblasts and Endothelial Cells in Rheumatoid Arthritis
0.809243	NA	green	Role of MAPK Signaling in the Pathogenesis of Influenza
0.482667	-1	green	Role of NANOG in Mammalian Embryonic Stem Cell Pluripotency
0.660572	-1.265	green	Role of NFAT in Cardiac Hypertrophy
0.711886	-2.333	green	Role of NFAT in Regulation of the Immune Response
0.244548	NA	green	Role of Oct4 in Mammalian Embryonic Stem Cell Pluripotency
0.389447	NA	green	Role of Osteoblasts, Osteoclasts and Chondrocytes in Rheumatoid Arthritis
0.149456	NA	green	Role of p14/p19ARF in Tumor Suppression
0.207522	-2.236	green	Role of Pattern Recognition Receptors in Recognition of Bacteria and Viruses
0.508674	-0.816	green	Role of PKR in Interferon Induction and Antiviral Response
1.11318	NA	green	Role of Tissue Factor in Cancer
0.244548	NA	green	Role of Wnt/GSK-3Î² Signaling in the Pathogenesis of Influenza
0	NA	green	S-adenosyl-L-methionine Biosynthesis
0.711886	NA	green	S-methyl-5-thio-Î±-D-ribose 1-phosphate Degradation
0	NA	green	Salvage Pathways of Pyrimidine Ribonucleotides
0.414352	-1.342	green	SAPK/JNK Signaling
0	NA	green	Semaphorin Signaling in Neurons
1.96488	-2.683	green	Senescence Pathway
0.51915	NA	green	Serine Biosynthesis
2.73091	-2.333	green	Serotonin Degradation
0.762933	NA	green	Serotonin Receptor Signaling
0.84831	NA	green	Sertoli Cell-Sertoli Cell Junction Signaling
0.396602	-2.236	green	Signaling by Rho Family GTPases
4.87695	1.877	green	Sirtuin Signaling Pathway
0.660572	NA	green	Small Cell Lung Cancer Signaling
0	NA	green	Sorbitol Degradation I
0	NA	green	Sperm Motility
0.203195	-2	green	Sphingosine-1-phosphate Signaling
0.760246	-0.447	green	SPINK1 General Cancer Pathway
0	NA	green	SPINK1 Pancreatic Cancer Pathway
0	NA	green	Spliceosomal Cycle
1.70924	-2.887	green	STAT3 Pathway
1.04645	-2	green	Stearate Biosynthesis I (Animals)
0	NA	green	Sulfite Oxidation IV
0	NA	green	Sumoylation Pathway
0.414342	NA	green	Superoxide Radicals Degradation
1.65348	-2.236	green	Superpathway of Cholesterol Biosynthesis
0.493695	NA	green	Superpathway of D-myo-inositol (1,4,5)-trisphosphate Metabolism
0.618336	NA	green	Superpathway of Geranylgeranyldiphosphate Biosynthesis I (via Mevalonate)
1.85271	-2.449	green	Superpathway of Methionine Degradation
0.97703	NA	green	Superpathway of Serine and Glycine Biosynthesis I
0.677026	-2.121	green	Synaptic Long Term Depression
0.262676	-1.508	green	Synaptogenesis Signaling Pathway
0.414342	-1.508	green	Systemic Lupus Erythematosus In B Cell Signaling Pathway
0.181099	-1.89	green	Systemic Lupus Erythematosus In T Cell Signaling Pathway
0	NA	green	Systemic Lupus Erythematosus Signaling
0.760246	-1.89	green	T Cell Exhaustion Signaling Pathway
0.243454	NA	green	T Cell Receptor Signaling
0	NA	green	T Helper Cell Differentiation
0.711886	NA	green	Taurine Biosynthesis
5.45903	-3	green	TCA Cycle II (Eukaryotic)
0.672586	-2	green	Tec Kinase Signaling
0.583218	-1.633	green	Telomerase Signaling
0	NA	green	Tetrapyrrole Biosynthesis II
0.821728	0.447	green	TGF-Î² Signaling
0	NA	green	Th1 Pathway
0.222957	NA	green	The Visual Cycle
0	NA	green	Thio-molybdenum Cofactor Biosynthesis
0	NA	green	Threonine Degradation II
0.711886	-2.121	green	Thrombin Signaling
0.730743	-1.342	green	Thrombopoietin Signaling
0	NA	green	Thymine Degradation
1.469	-0.707	green	Thyroid Cancer Signaling
0	NA	green	Tight Junction Signaling
0	NA	green	TNFR1 Signaling
0	NA	green	Toll-like Receptor Signaling
1.70488	NA	green	TR/RXR Activation
0	NA	green	TREM1 Signaling
0.817683	-2	green	Triacylglycerol Biosynthesis
0.296857	NA	green	Triacylglycerol Degradation
0	NA	green	tRNA Charging
0.255275	NA	green	tRNA Splicing
1.87438	-2.236	green	Tryptophan Degradation III (Eukaryotic)
0.477721	NA	green	Tryptophan Degradation to 2-amino-3-carboxymuconate Semialdehyde
2.18706	-1.342	green	Tryptophan Degradation X (Mammalian, via Tryptamine)
0	NA	green	Type I Diabetes Mellitus Signaling
0.640843	NA	green	Tyrosine Biosynthesis IV
0	NA	green	Tyrosine Degradation I
0	NA	green	UDP-N-acetyl-D-galactosamine Biosynthesis I
0	NA	green	UDP-N-acetyl-D-glucosamine Biosynthesis II
0.384554	NA	green	Unfolded protein response
0	NA	green	Uracil Degradation II (Reductive)
0	NA	green	Urate Biosynthesis/Inosine 5'-phosphate Degradation
0.81606	-1	green	UVA-Induced MAPK Signaling
0.414342	NA	green	UVB-Induced MAPK Signaling
[truncated: 5,043 more rows]

## Sheet: IPA top2
"module"	"pathways"	"-Log10(pvalue.adj)"
black	Superpathway of Cholesterol Biosynthesis; Pentose Phosphate Pathway	1.275573913; 0.998824553
blue	Leptin Signaling in Obesity; PPARÎ±/RXRÎ± Activation	0.632412624; 0.62095008
brown	Protein Ubiquitination Pathway; NRF2-mediated Oxidative Stress Response	4.202744616; 2.186923626
green	Mitochondrial Dysfunction; Oxidative Phosphorylation	12.1857997; 9.43362047
greenyellow	Cdc42 Signaling; Sirtuin Signaling Pathway	0.772451923; 0.735653551
grey	EIF2 Signaling; mTOR Signaling	3.21446142; 2.31243523
magenta	EIF2 Signaling; Fatty Acid Î²-oxidation I	0.118567348; 0.118567348
pink	Integrin Signaling; mTOR Signaling	1.679954067; 1.488707091
purple	EIF2 Signaling; Actin Cytoskeleton Signaling	0.759342133; 0.699305227
red	Protein Ubiquitination Pathway; Integrin Signaling	8.604366434; 2.301077096
salmon	IL-10 Signaling; LXR/RXR Activation	1.811848199; 1.770185094
tan	Actin Cytoskeleton Signaling; Integrin Signaling	1.18714131; 1.18714131
turquoise	EIF2 Signaling; mTOR Signaling	5.739275018; 2.864637515
yellow	IL-8 Signaling; IL-10 Signaling	3.692167148; 1.945683328

## Sheet: Module-Trait-Correlation
	Epiploic_ALL	Subcutaneous_ALL	Omental_ALL	Epiploic_Sensitive	Subcutaneous_Sensitive	Omental_Sensitive	Epiploic_Resistant	Subcutaneous_Resistant	Omental_Resistant
X1950_col_resistant	1	0	0	0	0	0	1	0	0
X1950_vis_resistant	0	0	1	0	0	0	0	0	1
X1959_col_sensitive	1	0	0	1	0	0	0	0	0
X1959_sc_sensitive	0	1	0	0	1	0	0	0	0
X1959_vis_sensitive	0	0	1	0	0	1	0	0	0
X2029_col_sensitive	1	0	0	1	0	0	0	0	0
X2029_sc_sensitive	0	1	0	0	1	0	0	0	0
X2029_vis_sensitive	0	0	1	0	0	1	0	0	0
X2045_col_resistant	1	0	0	0	0	0	1	0	0
X2045_sc_resistant	0	1	0	0	0	0	0	1	0
X2045_vis_resistant	0	0	1	0	0	0	0	0	1
X2059_col_resistant	1	0	0	0	0	0	1	0	0
X2059_sc_resistant	0	1	0	0	0	0	0	1	0
X2059_vis_resistant	0	0	1	0	0	0	0	0	1
X2060_col_sensitive	1	0	0	1	0	0	0	0	0
X2060_vis_sensitive	0	0	1	0	0	1	0	0	0
X2065_col_resistant	1	0	0	0	0	0	1	0	0
X2065_sc_resistant	0	1	0	0	0	0	0	1	0
X2065_vis_resistant	0	0	1	0	0	0	0	0	1
X2087_col_sensitive	1	0	0	1	0	0	0	0	0
X2087_sc_sensitive	0	1	0	0	1	0	0	0	0
X2087_vis_sensitive	0	0	1	0	0	1	0	0	0
X2119_col_sensitive	1	0	0	1	0	0	0	0	0
X2119_sc_sensitive	0	1	0	0	1	0	0	0	0
X2119_vis_sensitive	0	0	1	0	0	1	0	0	0
X2120_col_sensitive	1	0	0	1	0	0	0	0	0
X2120_sc_sensitive	0	1	0	0	1	0	0	0	0
X2127_col_sensitive	1	0	0	1	0	0	0	0	0
X2127_vis_sensitive	0	0	1	0	0	1	0	0	0
X2128_col_sensitive	1	0	0	1	0	0	0	0	0
X2128_sc_sensitive	0	1	0	0	1	0	0	0	0
X2128_vis_sensitive	0	0	1	0	0	1	0	0	0
X2181_col_resistant	1	0	0	0	0	0	1	0	0
X2181_sc_resistant	0	1	0	0	0	0	0	1	0
X2181_vis_resistant	0	0	1	0	0	0	0	0	1
X2229_col_resistant	1	0	0	0	0	0	1	0	0
X2229_sc_resistant	0	1	0	0	0	0	0	1	0
X2229_vis_resistant	0	0	1	0	0	0	0	0	1
X2301_vis_sensitive	0	0	1	0	0	1	0	0	0
X2364_sc_resistant	0	1	0	0	0	0	0	1	0
X2364_vis_resistant	0	0	1	0	0	0	0	0	1
X2459_col_resistant	1	0	0	0	0	0	1	0	0
X2459_sc_resistant	0	1	0	0	0	0	0	1	0
X2459_vis_resistant	0	0	1	0	0	0	0	0	1
X2464_col_resistant	1	0	0	0	0	0	1	0	0
X2464_sc_resistant	0	1	0	0	0	0	0	1	0
X2464_vis_resistant	0	0	1	0	0	0	0	0	1

## Sheet: Key drivers
Module	MM	MM_pvalue	GS	GS_pvalue	Trait	Accession	Gene
turquoise	0.677829	1.66064e-07	0.818725	2.05448e-12	Colon_ALL	A0A087WWM0;O43617;A0A087WYS5	TRAPPC3
blue	0.657112	5.25028e-07	0.459655	0.00115252	Colon_ALL	A0A0A0MTC7;A0A0A0MQS9;Q16363	LAMA4
brown	0.46175	0.00108646	0.4107	0.00413724	Colon_ALL	A0A0A0MTH3;Q13418	ILK
black	0.544686	7.54974e-05	0.567702	3.15975e-05	Colon_ALL	A0A0B4J2A0;Q9UHJ6	TRPV1;SHPK
yellow	0.593623	1.09237e-05	0.457698	0.0012174	Colon_ALL	A0A0C4DGH0;Q5ZPR3	CD276
yellow	0.442912	0.00182274	0.448467	0.00156955	Colon_ALL	A0A0G2JMH6;P01903;Q30118;A0A0G2JH46	HLA-DRA
green	0.550887	6.00828e-05	0.439775	0.00198115	Colon_ALL	A0A2R8YDQ9;A0A2R8Y6Y7;Q9P2R7;Q5T9Q5	SUCLA2
greenyellow	0.555556	5.04387e-05	0.412846	0.00392682	Colon_ALL	A0A3B3IRN5;Q06828	FMOD
brown	0.485653	0.000539373	0.67342	2.13796e-07	Colon_ALL	A0AVT1	UBA6
greenyellow	0.605584	6.48198e-06	0.554199	5.30845e-05	Colon_ALL	A6NNI4;A0A2R8Y478;G8JLH6;P21926;A0A087WU13	CD9
purple	0.678509	1.59661e-07	0.573502	2.51082e-05	Colon_ALL	C9J2Y9;P30876;C9J4M6;A0A1W2PPT5	POLR2B
black	0.481375	0.000613683	0.588979	1.33025e-05	Colon_ALL	C9J5N1;Q9BTE6	PTGES3L-AARSD1;AARSD1
yellow	0.467942	0.000910611	0.565365	3.46225e-05	Colon_ALL	C9JEN3;C9IYT2;F8WDY4;C9IZ27;C9JW19;C9JWV9;B4DUD2;Q969X1	TMBIM1
brown	0.542378	8.21041e-05	0.487706	0.000506662	Colon_ALL	E7EVA0;P27816	MAP4
purple	0.444604	0.00174201	0.444117	0.0017649	Colon_ALL	E7EVS6;A0A2R8YGF8;G5E9R0;C9JUM1;C9JZR7;C9JTX5	ACTB
black	0.667893	2.91691e-07	0.412431	0.00396681	Colon_ALL	E9PF17;P13611;Q86W61;D6RGZ6	VCAN
black	0.436242	0.00217409	0.488394	0.00049611	Colon_ALL	E9PGT6;Q99627;H7C3S9	COPS8
black	0.5506	6.07274e-05	0.404394	0.00481353	Colon_ALL	F8VR84;Q9HB07;F8VQQ3	C12orf10
green	0.414835	0.00374032	0.412154	0.00399362	Colon_ALL	G3V0I5;P49821;B4DE93	NDUFV1
yellow	0.457469	0.0012252	0.46297	0.0010496	Colon_ALL	H0YD13;P16070;H0Y2P0;H0YE40	CD44
tan	0.428026	0.00268849	0.40634	0.00459515	Colon_ALL	H3BSW0;A0A3B3ISV5;Q8N9N7	LRRC57
yellow	0.708322	2.55325e-08	0.410039	0.00420396	Colon_ALL	ILMN_1651315	HMG20B
green	0.530682	0.000124429	0.488447	0.00049531	Colon_ALL	ILMN_1651438	ZFPM1
turquoise	0.652686	6.63826e-07	0.434092	0.0022995	Colon_ALL	ILMN_1651496	HIST1H2BE
brown	0.476547	0.000708512	0.406728	0.00455274	Colon_ALL	ILMN_1651902	RASL11A
brown	0.695157	5.89348e-08	0.446961	0.00163493	Colon_ALL	ILMN_1652128	LMBRD1
purple	0.754754	8.898e-10	0.54618	7.14865e-05	Colon_ALL	ILMN_1652237	CBR3
turquoise	0.432593	0.0023907	0.410574	0.0041499	Colon_ALL	ILMN_1652309	TTC8
green	0.666521	3.14773e-07	0.458008	0.00120691	Colon_ALL	ILMN_1652357	PDHX
brown	0.670803	2.47875e-07	0.495459	0.000398647	Colon_ALL	ILMN_1652394	RAB2A
yellow	0.853592	2.47648e-14	0.406665	0.00455964	Colon_ALL	ILMN_1652631	GLIPR2
green	0.808838	6.07215e-12	0.508815	0.000260187	Colon_ALL	ILMN_1652677	FAM89A
blue	0.687907	9.16965e-08	0.42088	0.0032203	Colon_ALL	ILMN_1652797	FAM174B
brown	0.552521	5.65298e-05	0.426158	0.00281943	Colon_ALL	ILMN_1652959	ABCD2
brown	0.781229	9.23432e-11	0.552268	5.70681e-05	Colon_ALL	ILMN_1653133	SH3D19
brown	0.525913	0.000146776	0.464496	0.00100506	Colon_ALL	ILMN_1654414	ACSL3
brown	0.682469	1.26701e-07	0.536469	0.000101486	Colon_ALL	ILMN_1654473	ZP1
purple	0.726481	7.44954e-09	0.40854	0.00435883	Colon_ALL	ILMN_1654545	CPSF1
yellow	0.584613	1.59657e-05	0.407007	0.00452241	Colon_ALL	ILMN_1654571	FCHO1
blue	0.842812	1.08704e-13	0.537634	9.73633e-05	Colon_ALL	ILMN_1654737	TRIM32
green	0.653959	6.20771e-07	0.438	0.00207614	Colon_ALL	ILMN_1654861	ACO2
brown	0.56041	4.19314e-05	0.440143	0.00196197	Colon_ALL	ILMN_1655312	HPS5
brown	0.834459	3.17595e-13	0.539357	9.15473e-05	Colon_ALL	ILMN_1655469	TSPAN3
brown	0.593468	1.09962e-05	0.467325	0.000926905	Colon_ALL	ILMN_1655702	ABHD5
brown	0.553949	5.35844e-05	0.653671	6.30259e-07	Colon_ALL	ILMN_1655796	2020-03-03
blue	0.680594	1.41421e-07	0.437379	0.00211029	Colon_ALL	ILMN_1656186	SLC41A1
brown	0.633655	1.74521e-06	0.539052	9.25506e-05	Colon_ALL	ILMN_1656293	GOSR2
salmon	0.592281	1.15671e-05	0.404054	0.00485255	Colon_ALL	ILMN_1656310	IDO1
brown	0.550228	6.1572e-05	0.422836	0.00306622	Colon_ALL	ILMN_1656368	ALDH4A1
blue	0.727642	6.86265e-09	0.406533	0.00457397	Colon_ALL	ILMN_1656537	SNRPN
brown	0.526575	0.00014347	0.401819	0.00511631	Colon_ALL	ILMN_1656977	HIBCH
black	0.533	0.000114728	0.417163	0.00353195	Colon_ALL	ILMN_1657064	ERMARD
purple	0.573885	2.47261e-05	0.536429	0.000101633	Colon_ALL	ILMN_1657111	AHNAK2
tan	0.648843	8.11303e-07	0.488022	0.000501798	Colon_ALL	ILMN_1657139	ADAT1
brown	0.845592	7.50354e-14	0.550528	6.08897e-05	Colon_ALL	ILMN_1657643	KCNIP2
green	0.439947	0.00197217	0.464866	0.000994497	Colon_ALL	ILMN_1657683	C1orf198
green	0.834641	3.10461e-13	0.424422	0.00294611	Colon_ALL	ILMN_1657746	BPHL
purple	0.901287	5.86072e-18	0.441765	0.00187929	Colon_ALL	ILMN_1657797	FIBP
black	0.583173	1.69466e-05	0.468716	0.000890517	Colon_ALL	ILMN_1657803	CFH
green	0.403045	0.00497012	0.414176	0.00380127	Colon_ALL	ILMN_1657874
turquoise	0.524784	0.000152574	0.433173	0.00235504	Colon_ALL	ILMN_1658289	WDR54
greenyellow	0.662843	3.8528e-07	0.448965	0.00154849	Colon_ALL	ILMN_1658411	CHD4
green	0.757059	7.38955e-10	0.447351	0.00161774	Colon_ALL	ILMN_1658759	PEX19
brown	0.729531	5.99939e-09	0.416753	0.00356783	Colon_ALL	ILMN_1658992	DPM1
greenyellow	0.625906	2.53962e-06	0.479125	0.000656361	Colon_ALL	ILMN_1659029	DENND6B
purple	0.552241	5.71254e-05	0.404567	0.00479377	Colon_ALL	ILMN_1659063	OR51G1
yellow	0.639879	1.28146e-06	0.454054	0.00134699	Colon_ALL	ILMN_1659544	STX3
pink	0.573633	2.49772e-05	0.424686	0.00292656	Colon_ALL	ILMN_1659688	LGALS3BP
tan	0.821239	1.54346e-12	0.499019	0.0003564	Colon_ALL	ILMN_1659769	MRAP
yellow	0.548835	6.48314e-05	0.484749	0.000554356	Colon_ALL	ILMN_1659936	PPP1R15A
salmon	0.823945	1.12882e-12	0.41969	0.00331729	Colon_ALL	ILMN_1660027	FCGR2B
brown	0.638851	1.3492e-06	0.420314	0.00326613	Colon_ALL	ILMN_1660579	CRLF3
brown	0.756589	7.67589e-10	0.548005	6.68491e-05	Colon_ALL	ILMN_1660602	C1orf43
yellow	0.753084	1.01673e-09	0.5192	0.000184439	Colon_ALL	ILMN_1660691	RAB31
brown	0.752525	1.06285e-09	0.428588	0.00265016	Colon_ALL	ILMN_1660787	SUCLA2
greenyellow	0.657889	5.03658e-07	0.44666	0.00164825	Colon_ALL	ILMN_1660858	RIN1
brown	0.654538	6.02049e-07	0.449766	0.0015151	Colon_ALL	ILMN_1660890	ACADL
brown	0.609001	5.56247e-06	0.469468	0.000871385	Colon_ALL	ILMN_1661000	RPS6KC1
blue	0.658403	4.89965e-07	0.476039	0.000719235	Colon_ALL	ILMN_1661189	ZBTB41
turquoise	0.815053	3.09576e-12	0.456768	0.00124938	Colon_ALL	ILMN_1661491	SH3GL2
purple	0.696522	5.41531e-08	0.466087	0.000960429	Colon_ALL	ILMN_1661554	DIAPH1
brown	0.629393	2.14784e-06	0.436839	0.00214041	Colon_ALL	ILMN_1661589	CD151
brown	0.804932	9.15877e-12	0.443004	0.00181824	Colon_ALL	ILMN_1661595	C1orf53
brown	0.546856	6.97355e-05	0.410348	0.00417266	Colon_ALL	ILMN_1661683	THRA
brown	0.67336	2.14526e-07	0.549849	6.24429e-05	Colon_ALL	ILMN_1661717	TFDP1
yellow	0.613321	4.57233e-06	0.529323	0.00013046	Colon_ALL	ILMN_1661755	NIBAN2
brown	0.84526	7.84657e-14	0.503316	0.000310818	Colon_ALL	ILMN_1661799	HIGD1A
brown	0.708954	2.44988e-08	0.427593	0.00271832	Colon_ALL	ILMN_1662128	ISY1
green	0.441584	0.00188839	0.495932	0.000392782	Colon_ALL	ILMN_1662188	WNT11
brown	0.808843	6.06862e-12	0.56973	2.91716e-05	Colon_ALL	ILMN_1662306	RABL3
black	0.518213	0.000190663	0.41418	0.00380089	Colon_ALL	ILMN_1663119	DSC2
yellow	0.518651	0.000187877	0.40948	0.00426113	Colon_ALL	ILMN_1663132	ADCK2
brown	0.765609	3.64251e-10	0.468765	0.000889263	Colon_ALL	ILMN_1663220	MRPL22
brown	0.753463	9.86465e-10	0.447706	0.00160228	Colon_ALL	ILMN_1663486	TLK2
green	0.687118	9.61444e-08	0.44046	0.00194557	Colon_ALL	ILMN_1663512	COX5B
blue	0.542239	8.25189e-05	0.432754	0.00238075	Colon_ALL	ILMN_1663532	RIC8B
yellow	0.469255	0.000876764	0.419829	0.00330587	Colon_ALL	ILMN_1663722	DNAJB5
purple	0.820408	1.69741e-12	0.48709	0.000516291	Colon_ALL	ILMN_1664028	CENPB
turquoise	0.543881	7.77441e-05	0.412036	0.00400515	Colon_ALL	ILMN_1664176	FBLN5
blue	0.527658	0.000138209	0.654775	5.9454e-07	Colon_ALL	ILMN_1664330	CEACAM1
brown	0.802368	1.19353e-11	0.52935	0.000130334	Colon_ALL	ILMN_1664367	COQ6
green	0.737017	3.48284e-09	0.603642	7.06554e-06	Colon_ALL	ILMN_1664577	DLD
brown	0.540251	8.86543e-05	0.446974	0.00163433	Colon_ALL	ILMN_1664772	ATP2B4
brown	0.646746	9.04071e-07	0.471522	0.000820985	Colon_ALL	ILMN_1664833	MRPL50
greenyellow	0.698018	4.93265e-08	0.463408	0.00103664	Colon_ALL	ILMN_1664912	IL11RA
green	0.783692	7.36186e-11	0.4076	0.00445848	Colon_ALL	ILMN_1664931	GTF2E2
greenyellow	0.632589	1.83879e-06	0.482734	0.000589146	Colon_ALL	ILMN_1665095	NSMF
green	0.663377	3.74197e-07	0.5378	9.67888e-05	Colon_ALL	ILMN_1665132	CD36
brown	0.80896	5.99359e-12	0.603414	7.13693e-06	Colon_ALL	ILMN_1665235	CRTAP
blue	0.747162	1.61772e-09	0.45145	0.00144698	Colon_ALL	ILMN_1665300	TRMT1L
greenyellow	0.752323	1.08003e-09	0.525521	0.000148768	Colon_ALL	ILMN_1665526	TCEA2
brown	0.608075	5.79883e-06	0.460442	0.0011273	Colon_ALL	ILMN_1665538	SKP2
green	0.741785	2.43977e-09	0.418058	0.00345459	Colon_ALL	ILMN_1665775	2020-03-02
brown	0.455617	0.00128995	0.465735	0.000970123	Colon_ALL	ILMN_1665831	CLPTM1
magenta	0.506503	0.000280488	0.410937	0.0041135	Colon_ALL	ILMN_1665832	ID1
brown	0.673752	2.09792e-07	0.443775	0.00178114	Colon_ALL	ILMN_1665964	GAB2
blue	0.841257	1.33335e-13	0.421143	0.0031992	Colon_ALL	ILMN_1666096	ACSL3
tan	0.651257	7.15477e-07	0.458135	0.00120265	Colon_ALL	ILMN_1666471	UQCRQ
brown	0.600574	8.08671e-06	0.551156	5.94833e-05	Colon_ALL	ILMN_1666482	SP2
brown	0.732265	4.92912e-09	0.462971	0.00104957	Colon_ALL	ILMN_1666494	CRK
yellow	0.556495	4.86788e-05	0.520354	0.000177398	Colon_ALL	ILMN_1667081	CCND2
greenyellow	0.492664	0.000434921	0.411142	0.00409305	Colon_ALL	ILMN_1667120	FBXO9
brown	0.668649	2.7966e-07	0.49501	0.000404286	Colon_ALL	ILMN_1667374	L3HYPDH
brown	0.770449	2.40836e-10	0.511555	0.000237864	Colon_ALL	ILMN_1667429	SLC25A20
salmon	0.704323	3.30761e-08	0.482199	0.000598696	Colon_ALL	ILMN_1667707	SPCS3
brown	0.688423	8.88969e-08	0.572801	2.58215e-05	Colon_ALL	ILMN_1667948	SPATA18
blue	0.759179	6.21774e-10	0.56076	4.13731e-05	Colon_ALL	ILMN_1668446	ABCA9
green	0.758995	6.31164e-10	0.415322	0.00369585	Colon_ALL	ILMN_1668510	GLYAT
salmon	0.4821	0.000600479	0.437944	0.00207919	Colon_ALL	ILMN_1668629	C4orf48
black	0.563314	3.74928e-05	0.415772	0.00365515	Colon_ALL	ILMN_1668743	RILPL2
greenyellow	0.569024	2.99959e-05	0.563008	3.79397e-05	Colon_ALL	ILMN_1668924	BEGAIN
blue	0.772196	2.06907e-10	0.41225	0.00398428	Colon_ALL	ILMN_1668960	MID1IP1
yellow	0.510717	0.000244498	0.506837	0.00027747	Colon_ALL	ILMN_1669015	XPNPEP1
brown	0.418504	0.00341658	0.427445	0.00272863	Colon_ALL	ILMN_1669032	PPIC
purple	0.672903	2.20158e-07	0.445949	0.00168015	Colon_ALL	ILMN_1669323	BACE2
salmon	0.863294	5.8915e-15	0.442926	0.00182203	Colon_ALL	ILMN_1669376	DRAM1
greenyellow	0.600572	8.0873e-06	0.560851	4.12289e-05	Colon_ALL	ILMN_1669377	AP4B1
greenyellow	0.739937	2.8033e-09	0.515376	0.000209625	Colon_ALL	ILMN_1669599	DENND4C
brown	0.70401	3.37471e-08	0.40256	0.00502758	Colon_ALL	ILMN_1669631	GLRB
brown	0.590505	1.24726e-05	0.445778	0.00168791	Colon_ALL	ILMN_1669729	ERLIN2
brown	0.620439	3.28905e-06	0.450258	0.00149489	Colon_ALL	ILMN_1669881	TSPAN13
green	0.566179	3.35397e-05	0.529299	0.000130567	Colon_ALL	ILMN_1670079	OMA1
greenyellow	0.576421	2.23284e-05	0.507598	0.000270701	Colon_ALL	ILMN_1670377	ZNF20
blue	0.451643	0.00143935	0.457614	0.00122025	Colon_ALL	ILMN_1670708	F10
greenyellow	0.820139	1.7502e-12	0.65943	4.63625e-07	Colon_ALL	ILMN_1670796	EXOSC10
greenyellow	0.477574	0.00068731	0.443301	0.00180387	Colon_ALL	ILMN_1670920	FBXL18
brown	0.422331	0.00310538	0.514016	0.000219305	Colon_ALL	ILMN_1670970	PPP3CA
green	0.558786	4.46196e-05	0.440451	0.00194604	Colon_ALL	ILMN_1671295	CCDC3
brown	0.642545	1.12031e-06	0.579049	2.00706e-05	Colon_ALL	ILMN_1671452	MRPL44
brown	0.819904	1.79762e-12	0.472177	0.000805466	Colon_ALL	ILMN_1671693	TPGS2
brown	0.778018	1.23543e-10	0.641049	1.20826e-06	Colon_ALL	ILMN_1672024	ISCA1
green	0.730127	5.74898e-09	0.566617	3.29703e-05	Colon_ALL	ILMN_1672057	AQP7
greenyellow	0.475279	0.000735518	0.510224	0.000248483	Colon_ALL	ILMN_1672121	CCDC184
greenyellow	0.430583	0.00251798	0.551749	5.81846e-05	Colon_ALL	ILMN_1672658	OR6B2
brown	0.629853	2.10062e-06	0.457875	0.0012114	Colon_ALL	ILMN_1672717	TMEM254
brown	0.919056	8.15577e-20	0.591871	1.17706e-05	Colon_ALL	ILMN_1672741	ITSN1
yellow	0.484397	0.000560292	0.411142	0.00409305	Colon_ALL	ILMN_1672878	ABR
blue	0.530197	0.000126552	0.451969	0.0014265	Colon_ALL	ILMN_1672899	POMC
blue	0.411723	0.00403575	0.403034	0.00497143	Colon_ALL	ILMN_1673129	PCDH12
salmon	0.65183	6.94339e-07	0.440449	0.00194613	Colon_ALL	ILMN_1673282	LAMP2
turquoise	0.42612	0.00282212	0.402679	0.0050134	Colon_ALL	ILMN_1673639	ABI3BP
brown	0.650909	7.28612e-07	0.468641	0.000892459	Colon_ALL	ILMN_1673795	HSD17B4
brown	0.792986	3.04679e-11	0.468296	0.000901381	Colon_ALL	ILMN_1673880	EFEMP1
purple	0.613429	4.54983e-06	0.433833	0.00231501	Colon_ALL	ILMN_1673966	POLR3F
brown	0.593468	1.09962e-05	0.454978	0.00131299	Colon_ALL	ILMN_1674032	ABCD3
brown	0.754633	8.98471e-10	0.445944	0.00168041	Colon_ALL	ILMN_1674151	MYZAP
black	0.549357	6.35931e-05	0.450473	0.00148616	Colon_ALL	ILMN_1674231	CHAF1B
blue	0.469963	0.000858998	0.703583	3.46832e-08	Colon_ALL	ILMN_1674367	SPRR2F
brown	0.69496	5.96596e-08	0.621244	3.16711e-06	Colon_ALL	ILMN_1674719	NID1
green	0.836333	2.51001e-13	0.551272	5.92272e-05	Colon_ALL	ILMN_1674941	ANO6
blue	0.610608	5.17311e-06	0.513046	0.000226458	Colon_ALL	ILMN_1675325	ENPEP
brown	0.700287	4.27701e-08	0.470793	0.000838583	Colon_ALL	ILMN_1675386	CES1
blue	0.75309	1.01621e-09	0.446174	0.00167002	Colon_ALL	ILMN_1676191	DARS2
brown	0.459752	0.00114938	0.407322	0.0044883	Colon_ALL	ILMN_1676213	SRPX2
brown	0.686617	9.90726e-08	0.582201	1.76397e-05	Colon_ALL	ILMN_1676265	LEPR
brown	0.663293	3.75919e-07	0.683509	1.19168e-07	Colon_ALL	ILMN_1676296	PLPP1
salmon	0.82063	1.6549e-12	0.432877	0.00237317	Colon_ALL	ILMN_1676372	CD209
turquoise	0.502307	0.000321018	0.457556	0.00122225	Colon_ALL	ILMN_1676413	VSNL1
greenyellow	0.526258	0.000145048	0.613041	4.63104e-06	Colon_ALL	ILMN_1676449	SLIT2
brown	0.847115	6.1054e-14	0.426536	0.00279251	Colon_ALL	ILMN_1676523	CCDC91
turquoise	0.546547	7.05301e-05	0.608027	5.81133e-06	Colon_ALL	ILMN_1676749	MAATS1
brown	0.733095	4.64164e-09	0.54734	6.85052e-05	Colon_ALL	ILMN_1677038	CPED1
brown	0.826514	8.34589e-13	0.414242	0.0037951	Colon_ALL	ILMN_1677098	YPEL2
brown	0.622487	2.98713e-06	0.467494	0.000922419	Colon_ALL	ILMN_1677138	POLR2J
turquoise	0.429951	0.00255919	0.410974	0.00410984	Colon_ALL	ILMN_1677200	CYFIP2
green	0.654184	6.13444e-07	0.443657	0.00178677	Colon_ALL	ILMN_1677292	C5orf30
green	0.708323	2.55297e-08	0.512026	0.000234208	Colon_ALL	ILMN_1677384	PTGER3
green	0.597888	9.09052e-06	0.583475	1.67369e-05	Colon_ALL	ILMN_1677607	SC5D
brown	0.507889	0.000268155	0.405517	0.00468651	Colon_ALL	ILMN_1677693	HCAR3
brown	0.718234	1.31887e-08	0.514867	0.000213198	Colon_ALL	ILMN_1677723	ANGPT1
brown	0.843198	1.03291e-13	0.419725	0.0033144	Colon_ALL	ILMN_1677824	RAB4A
brown	0.765176	3.77806e-10	0.507901	0.000268051	Colon_ALL	ILMN_1677887	PMS2
black	0.502108	0.00032306	0.410308	0.00417668	Colon_ALL	ILMN_1678004	TMEM41B
green	0.572423	2.62141e-05	0.488362	0.000496596	Colon_ALL	ILMN_1678612	ANXA6
blue	0.772922	1.94185e-10	0.415288	0.0036989	Colon_ALL	ILMN_1678652	TCTN3
green	0.607454	5.96268e-06	0.497132	0.000378259	Colon_ALL	ILMN_1678692	MPRIP
greenyellow	0.77112	2.27227e-10	0.522552	0.000164659	Colon_ALL	ILMN_1678705	ENDOV
brown	0.683459	1.19523e-07	0.436968	0.00213317	Colon_ALL	ILMN_1678922	HERC4
greenyellow	0.512514	0.000230471	0.445587	0.00169662	Colon_ALL	ILMN_1678934	POLR1E
brown	0.689022	8.57447e-08	0.416512	0.00358913	Colon_ALL	ILMN_1678961	FRMD4A
brown	0.795665	2.34306e-11	0.438929	0.00202593	Colon_ALL	ILMN_1679188	DMAC2L
brown	0.601522	7.75721e-06	0.512439	0.000231042	Colon_ALL	ILMN_1679867	HSF1
brown	0.752594	1.0571e-09	0.492001	0.000443949	Colon_ALL	ILMN_1680246	MAT2B
brown	0.619996	3.35801e-06	0.532577	0.000116444	Colon_ALL	ILMN_1680348	NBPF3
blue	0.67732	1.71016e-07	0.556872	4.79882e-05	Colon_ALL	ILMN_1680453	ITM2C
brown	0.787026	5.39155e-11	0.492914	0.000431555	Colon_ALL	ILMN_1680659	JHY
purple	0.58042	1.89776e-05	0.407172	0.00450451	Colon_ALL	ILMN_1680693	ZNF419
yellow	0.635176	1.61932e-06	0.471368	0.000824671	Colon_ALL	ILMN_1680805	IFNLR1
turquoise	0.729114	6.18104e-09	0.433816	0.00231606	Colon_ALL	ILMN_1680925	SLC9A3R1
brown	0.411487	0.00405889	0.469785	0.000863435	Colon_ALL	ILMN_1680937	HIST1H2BC
blue	0.447206	0.0016241	0.461043	0.00110838	Colon_ALL	ILMN_1680973	FOXF1
tan	0.896865	1.49767e-17	0.45701	0.00124098	Colon_ALL	ILMN_1681081	AGPAT2
blue	0.805777	8.38561e-12	0.463375	0.0010376	Colon_ALL	ILMN_1681543	RHBDD1
brown	0.400332	0.00529865	0.400028	0.00533661	Colon_ALL	ILMN_1681972	TMEM69
brown	0.599835	8.35194e-06	0.600159	8.23456e-06	Colon_ALL	ILMN_1682100	IGSF10
turquoise	0.623177	2.89129e-06	0.527671	0.000138146	Colon_ALL	ILMN_1682326	PCP4
brown	0.515171	0.000211054	0.566331	3.33417e-05	Colon_ALL	ILMN_1682449	ZNF518B
greenyellow	0.523443	0.000159733	0.535126	0.000106438	Colon_ALL	ILMN_1682658	EPM2AIP1
brown	0.578812	2.02649e-05	0.461133	0.00110555	Colon_ALL	ILMN_1682953	PGAM4
turquoise	0.514359	0.000216826	0.462654	0.00105905	Colon_ALL	ILMN_1682987	PDZRN4
blue	0.54842	6.5834e-05	0.489679	0.000476921	Colon_ALL	ILMN_1683243	VPS45
greenyellow	0.472187	0.000805244	0.600348	8.16696e-06	Colon_ALL	ILMN_1683263	TSPAN8
brown	0.602697	7.36646e-06	0.496147	0.000390145	Colon_ALL	ILMN_1683302	SMC4
brown	0.650239	7.54535e-07	0.405144	0.00472836	Colon_ALL	ILMN_1683470	TMEM139
yellow	0.698791	4.69922e-08	0.433357	0.00234383	Colon_ALL	ILMN_1683475	TOMM40
brown	0.791999	3.35316e-11	0.440837	0.00192619	Colon_ALL	ILMN_1683635	CFAP300
blue	0.712171	1.98202e-08	0.445042	0.00172168	Colon_ALL	ILMN_1684289	PNPO
yellow	0.592112	1.16505e-05	0.55959	4.32702e-05	Colon_ALL	ILMN_1684401	FMO1
turquoise	0.635158	1.6208e-06	0.442529	0.00184145	Colon_ALL	ILMN_1684461	CADPS2
turquoise	0.521621	0.000169948	0.43963	0.00198876	Colon_ALL	ILMN_1684558	C1QTNF9
brown	0.479629	0.000646575	0.473258	0.000780449	Colon_ALL	ILMN_1684585	ACSL1
brown	0.649955	7.65761e-07	0.454987	0.00131267	Colon_ALL	ILMN_1684836	AKAP12
brown	0.694972	5.96154e-08	0.443713	0.00178412	Colon_ALL	ILMN_1685022	CAPN7
brown	0.515803	0.000206664	0.490359	0.000467042	Colon_ALL	ILMN_1685472	LRRTM4
brown	0.820487	1.682e-12	0.440145	0.00196185	Colon_ALL	ILMN_1685678	EEF1B2
brown	0.711753	2.03771e-08	0.415938	0.00364023	Colon_ALL	ILMN_1686645	UTP14C
brown	0.667957	2.90661e-07	0.432599	0.0023903	Colon_ALL	ILMN_1686697	FBXO38
tan	0.710802	2.16983e-08	0.400244	0.0053097	Colon_ALL	ILMN_1686805	CRK
turquoise	0.500461	0.000340473	0.500214	0.000343153	Colon_ALL	ILMN_1686862
brown	0.659345	4.65744e-07	0.701841	3.8758e-08	Colon_ALL	ILMN_1687201	APOL6
brown	0.793798	2.81459e-11	0.572921	2.56986e-05	Colon_ALL	ILMN_1687612	PPARG
greenyellow	0.545497	7.32943e-05	0.446564	0.00165253	Colon_ALL	ILMN_1687840	ABCB7
brown	0.65614	5.52977e-07	0.41871	0.00339912	Colon_ALL	ILMN_1688606	RNFT1
brown	0.444774	0.00173409	0.470921	0.000835466	Colon_ALL	ILMN_1688727	METTL23
red	0.767745	3.03827e-10	0.404731	0.00477505	Colon_ALL	ILMN_1688818	TIMM23B
brown	0.739468	2.90335e-09	0.561322	4.04888e-05	Colon_ALL	ILMN_1688886	GPC5
blue	0.422755	0.00307248	0.662309	3.96673e-07	Colon_ALL	ILMN_1689086	CTSC
purple	0.780664	9.72261e-11	0.525435	0.000149209	Colon_ALL	ILMN_1689156	MMAB
brown	0.61125	5.02464e-06	0.462299	0.00106973	Colon_ALL	ILMN_1689306	TMC7
red	0.701588	3.93868e-08	0.609947	5.33013e-06	Colon_ALL	ILMN_1689336	HOXA10
brown	0.616973	3.86527e-06	0.439509	0.00199515	Colon_ALL	ILMN_1689578	TLR3
brown	0.554314	5.28547e-05	0.541747	8.39997e-05	Colon_ALL	ILMN_1689585	C20orf194
blue	0.504844	0.00029592	0.513319	0.000224425	Colon_ALL	ILMN_1690241	BATF2
purple	0.815475	2.95445e-12	0.454208	0.00134125	Colon_ALL	ILMN_1690252	ALKBH2
brown	0.4232	0.00303831	0.401788	0.00512012	Colon_ALL	ILMN_1690365	USP41
brown	0.700481	4.22492e-08	0.575	2.36442e-05	Colon_ALL	ILMN_1690806	HACD2
blue	0.543396	7.91273e-05	0.601059	7.91651e-06	Colon_ALL	ILMN_1690839	PLPP7
yellow	0.56234	3.89317e-05	0.4154	0.00368876	Colon_ALL	ILMN_1691111	SPATA2L
greenyellow	0.736266	3.68126e-09	0.409347	0.00427485	Colon_ALL	ILMN_1691276	CXXC1
brown	0.601411	7.79542e-06	0.413358	0.00387805	Colon_ALL	ILMN_1691425	RTL6
brown	0.902296	4.70221e-18	0.430322	0.00253489	Colon_ALL	ILMN_1691570	METTL5
black	0.651325	7.12926e-07	0.466415	0.000951427	Colon_ALL	ILMN_1691747	KHDRBS3
brown	0.459986	0.00114185	0.48751	0.000509704	Colon_ALL	ILMN_1691876	TAFA2
brown	0.82792	7.05964e-13	0.570188	2.86482e-05	Colon_ALL	ILMN_1692077	MXRA7
green	0.534394	0.000109229	0.643673	1.05797e-06	Colon_ALL	ILMN_1692123	ELOVL3
blue	0.581262	1.83336e-05	0.418219	0.00344078	Colon_ALL	ILMN_1692177	TSC22D1
blue	0.774405	1.70449e-10	0.520271	0.000177893	Colon_ALL	ILMN_1692824	ASPA
greenyellow	0.612952	4.64992e-06	0.570251	2.85764e-05	Colon_ALL	ILMN_1693090	CROT
brown	0.851023	3.56038e-14	0.401289	0.00518075	Colon_ALL	ILMN_1693250	ACBD5
purple	0.698388	4.81964e-08	0.446761	0.00164376	Colon_ALL	ILMN_1693471	KLHL35
turquoise	0.711802	2.03109e-08	0.434302	0.00228697	Colon_ALL	ILMN_1693538	STK36
turquoise	0.465899	0.000965602	0.438324	0.00205851	Colon_ALL	ILMN_1693635	TSPYL2
purple	0.610402	5.22151e-06	0.412236	0.00398565	Colon_ALL	ILMN_1694057	EIF3K
brown	0.703663	3.45063e-08	0.505377	0.000290883	Colon_ALL	ILMN_1694240	MAP2K1
turquoise	0.600564	8.09008e-06	0.403262	0.00494466	Colon_ALL	ILMN_1694514	ZDHHC11
turquoise	0.501176	0.000332812	0.403044	0.00497024	Colon_ALL	ILMN_1694840	MATN2
brown	0.834991	2.97166e-13	0.488345	0.000496859	Colon_ALL	ILMN_1694875	APPBP2
yellow	0.758873	6.37531e-10	0.447894	0.00159413	Colon_ALL	ILMN_1695423	CD9
brown	0.572848	2.57732e-05	0.539165	9.21773e-05	Colon_ALL	ILMN_1695432	TPST2
greenyellow	0.57053	2.82628e-05	0.532908	0.000115098	Colon_ALL	ILMN_1695706	H3F3B
turquoise	0.710827	2.16619e-08	0.436483	0.00216043	Colon_ALL	ILMN_1695946	TRNP1
brown	0.625432	2.59774e-06	0.482184	0.000598966	Colon_ALL	ILMN_1696099	ALDH4A1
salmon	0.840823	1.41097e-13	0.497353	0.000375631	Colon_ALL	ILMN_1696347	CTSC
brown	0.60487	6.69116e-06	0.513633	0.000222102	Colon_ALL	ILMN_1696419	STOM
brown	0.666378	3.17258e-07	0.504063	0.000303453	Colon_ALL	ILMN_1696591	RB1
purple	0.780777	9.62263e-11	0.441784	0.00187834	Colon_ALL	ILMN_1696601	VARS
salmon	0.574299	2.43193e-05	0.501741	0.000326873	Colon_ALL	ILMN_1697220	NT5E
brown	0.639734	1.29083e-06	0.49942	0.000351905	Colon_ALL	ILMN_1697328	SPATA9
turquoise	0.469619	0.000867594	0.44772	0.00160169	Colon_ALL	ILMN_1697544	SLC25A29
brown	0.735909	3.77906e-09	0.422305	0.0031074	Colon_ALL	ILMN_1698231	RRM2B
blue	0.532945	0.000114946	0.570361	2.84525e-05	Colon_ALL	ILMN_1698259	TMEM100
purple	0.873913	1.07292e-15	0.520452	0.000176811	Colon_ALL	ILMN_1698478	SNAPC2
greenyellow	0.443735	0.00178306	0.434395	0.00228144	Colon_ALL	ILMN_1698894	OR5AS1
blue	0.640495	1.24243e-06	0.41471	0.00375177	Colon_ALL	ILMN_1699049	PRKRIP1
turquoise	0.502945	0.000314536	0.407444	0.00447521	Colon_ALL	ILMN_1699206	FHDC1
brown	0.774381	1.70801e-10	0.572302	2.63413e-05	Colon_ALL	ILMN_1699552	PDZRN3
brown	0.679312	1.5239e-07	0.453006	0.00138647	Colon_ALL	ILMN_1699574	NRP1
blue	0.783725	7.33898e-11	0.618113	3.66615e-06	Colon_ALL	ILMN_1699644	2020-03-03
green	0.52574	0.000147654	0.416418	0.00359743	Colon_ALL	ILMN_1699695	TNFRSF21
brown	0.681699	1.32565e-07	0.415413	0.00368759	Colon_ALL	ILMN_1699859	GNPAT
brown	0.549123	6.41448e-05	0.418384	0.00342674	Colon_ALL	ILMN_1700202	TMEM135
salmon	0.582872	1.71585e-05	0.588745	1.34342e-05	Colon_ALL	ILMN_1700408	TRIM50
blue	0.500255	0.000342705	0.432507	0.00239601	Colon_ALL	ILMN_1700515	C17orf58
blue	0.707365	2.71741e-08	0.456289	0.00126613	Colon_ALL	ILMN_1700811	UBFD1
brown	0.552644	5.62707e-05	0.549499	6.32578e-05	Colon_ALL	ILMN_1700915	BMI1
green	0.611771	4.90715e-06	0.585835	1.51753e-05	Colon_ALL	ILMN_1701017	SAA2
tan	0.592307	1.15545e-05	0.500061	0.000344823	Colon_ALL	ILMN_1701025	EPHX1
blue	0.668463	2.82586e-07	0.528349	0.000134942	Colon_ALL	ILMN_1701204	VEGFC
brown	0.669619	2.64907e-07	0.473694	0.000770554	Colon_ALL	ILMN_1701293	COX7A2
greenyellow	0.79651	2.155e-11	0.488873	0.000488883	Colon_ALL	ILMN_1701413	PIGQ
brown	0.893195	3.16127e-17	0.619696	3.40542e-06	Colon_ALL	ILMN_1701507	EHHADH
brown	0.619878	3.37663e-06	0.421207	0.0031941	Colon_ALL	ILMN_1701604	TBC1D8B
purple	0.76816	2.93251e-10	0.438579	0.00204469	Colon_ALL	ILMN_1701877	AXL
tan	0.810563	5.04886e-12	0.418986	0.0033759	Colon_ALL	ILMN_1701930	EEF1B2
turquoise	0.507571	0.000270936	0.572014	2.66448e-05	Colon_ALL	ILMN_1702447	IGF2BP2
turquoise	0.635636	1.583e-06	0.470417	0.000847768	Colon_ALL	ILMN_1702503	ALDH3A1
tan	0.82809	6.9172e-13	0.504096	0.00030313	Colon_ALL	ILMN_1702633	RETSAT
blue	0.419642	0.00332129	0.533807	0.000111511	Colon_ALL	ILMN_1703326	PTGDR2
turquoise	0.454698	0.00132324	0.402782	0.00500121	Colon_ALL	ILMN_1703408	FZD3
purple	0.735286	3.95609e-09	0.440277	0.00195504	Colon_ALL	ILMN_1703477	ARHGEF2
green	0.701012	4.08523e-08	0.620131	3.33678e-06	Colon_ALL	ILMN_1703511	PDZRN3
brown	0.720314	1.14413e-08	0.425577	0.00286128	Colon_ALL	ILMN_1703891	TBC1D9
turquoise	0.470246	0.000851985	0.458728	0.00118285	Colon_ALL	ILMN_1704101	HSF4
greenyellow	0.658417	4.89599e-07	0.426886	0.00276772	Colon_ALL	ILMN_1704195	FCSK
blue	0.523507	0.000159386	0.431817	0.0024391	Colon_ALL	ILMN_1704236	MAX
purple	0.78072	9.67282e-11	0.52147	0.000170821	Colon_ALL	ILMN_1704286	FXYD5
yellow	0.734384	4.22577e-09	0.404276	0.00482703	Colon_ALL	ILMN_1704985	CYP27A1
greenyellow	0.837799	2.08379e-13	0.51144	0.000238764	Colon_ALL	ILMN_1705151	SF3A3
tan	0.642129	1.14415e-06	0.51737	0.000196128	Colon_ALL	ILMN_1705213	TMBIM1
tan	0.711449	2.07906e-08	0.430471	0.00252524	Colon_ALL	ILMN_1705676	MRAP
tan	0.869064	2.37858e-15	0.515258	0.000210445	Colon_ALL	ILMN_1705743	ARHGEF40
black	0.546719	7.00862e-05	0.527712	0.00013795	Colon_ALL	ILMN_1706521	CSNK1G2
brown	0.596338	9.72109e-06	0.443645	0.00178739	Colon_ALL	ILMN_1706784	H2AFV
brown	0.627025	2.40716e-06	0.530696	0.000124369	Colon_ALL	ILMN_1706845	OPHN1
blue	0.40716	0.00450583	0.432563	0.00239255	Colon_ALL	ILMN_1706935	CCDC136
brown	0.636337	1.52902e-06	0.466108	0.000959847	Colon_ALL	ILMN_1707084	UBE2D4
brown	0.702324	3.75857e-08	0.46852	0.000895583	Colon_ALL	ILMN_1707199	WDR20
tan	0.64902	8.03853e-07	0.438476	0.00205024	Colon_ALL	ILMN_1707232	EBF3
brown	0.818442	2.12105e-12	0.489207	0.000483889	Colon_ALL	ILMN_1707592	RGN
brown	0.603165	7.21611e-06	0.589681	1.29149e-05	Colon_ALL	ILMN_1707612	VEGFD
blue	0.901738	5.31286e-18	0.436637	0.00215172	Colon_ALL	ILMN_1708098	LIX1L
brown	0.700542	4.20861e-08	0.435105	0.00223964	Colon_ALL	ILMN_1708627	SRP9
brown	0.644507	1.01393e-06	0.493617	0.000422234	Colon_ALL	ILMN_1708782	MFAP3
brown	0.653299	6.42743e-07	0.541147	8.58384e-05	Colon_ALL	ILMN_1708954	GAR1
turquoise	0.583132	1.69758e-05	0.4326	0.00239023	Colon_ALL	ILMN_1708983	CASC1
blue	0.456268	0.00126688	0.445444	0.00170315	Colon_ALL	ILMN_1709124	ANO8
turquoise	0.50252	0.000318842	0.40127	0.00518297	Colon_ALL	ILMN_1709307	GPSM1
brown	0.541397	8.50668e-05	0.59258	1.14209e-05	Colon_ALL	ILMN_1709486	SRPX
brown	0.780214	1.01292e-10	0.708603	2.50676e-08	Colon_ALL	ILMN_1709613	IGF1
brown	0.670112	2.57687e-07	0.482453	0.000594145	Colon_ALL	ILMN_1709728	SLC30A5
brown	0.565609	3.42953e-05	0.448182	0.00158174	Colon_ALL	ILMN_1709772	SNX5
purple	0.719613	1.20047e-08	0.434377	0.00228254	Colon_ALL	ILMN_1709814	NMRAL1
green	0.668537	2.81421e-07	0.420284	0.00326855	Colon_ALL	ILMN_1710075	FAM89A
brown	0.607889	5.84753e-06	0.414796	0.00374388	Colon_ALL	ILMN_1710078	TMEM181
turquoise	0.586136	1.49859e-05	0.469172	0.000878877	Colon_ALL	ILMN_1710495	PAPLN
black	0.76031	5.66616e-10	0.412446	0.00396532	Colon_ALL	ILMN_1710544	PCDH7
brown	0.781465	9.0367e-11	0.606479	6.22838e-06	Colon_ALL	ILMN_1710906	RNF145
yellow	0.481041	0.000619867	0.54628	7.12238e-05	Colon_ALL	ILMN_1710962	TMEM97
brown	0.764618	3.95985e-10	0.469586	0.000868413	Colon_ALL	ILMN_1711089	DNAJC21
brown	0.492029	0.000443561	0.523207	0.000161026	Colon_ALL	ILMN_1711314	NUDT5
blue	0.82857	6.5303e-13	0.660517	4.37197e-07	Colon_ALL	ILMN_1711514	COCH
turquoise	0.516545	0.000201611	0.531199	0.000122202	Colon_ALL	ILMN_1711573	CD96
green	0.598336	8.91549e-06	0.457222	0.00123366	Colon_ALL	ILMN_1711650	ACSL4
blue	0.485803	0.000536915	0.441152	0.00191016	Colon_ALL	ILMN_1711799	C9orf40
brown	0.663591	3.69844e-07	0.512982	0.000226936	Colon_ALL	ILMN_1712298	ANKRD46
yellow	0.671225	2.42051e-07	0.454754	0.00132117	Colon_ALL	ILMN_1712545	S100A3
green	0.637889	1.41554e-06	0.431308	0.00247134	Colon_ALL	ILMN_1712577	FAM174A
brown	0.748693	1.43647e-09	0.426671	0.00278294	Colon_ALL	ILMN_1712659	PPP2CB
brown	0.645924	9.43026e-07	0.500338	0.000341807	Colon_ALL	ILMN_1712678	RPS27L
brown	0.730095	5.76253e-09	0.408903	0.00432087	Colon_ALL	ILMN_1712786	AHCYL2
green	0.797208	2.01043e-11	0.51171	0.000236654	Colon_ALL	ILMN_1712859	FAM89A
purple	0.784438	6.86914e-11	0.495059	0.000403665	Colon_ALL	ILMN_1712887	SLC10A3
purple	0.697955	4.95214e-08	0.411919	0.0040165	Colon_ALL	ILMN_1712914	SEMA6B
brown	0.446604	0.00165075	0.438221	0.0020641	Colon_ALL	ILMN_1712985	C17orf58
greenyellow	0.670828	2.47524e-07	0.522438	0.000165297	Colon_ALL	ILMN_1713189	KANSL2
turquoise	0.403391	0.00492963	0.415496	0.00368009	Colon_ALL	ILMN_1713249	PHF19
greenyellow	0.652214	6.80483e-07	0.420574	0.00324501	Colon_ALL	ILMN_1713732	ABL1
turquoise	0.544334	7.64742e-05	0.447948	0.0015918	Colon_ALL	ILMN_1713744	C14orf132
brown	0.822715	1.30211e-12	0.513645	0.000222017	Colon_ALL	ILMN_1713892	SMIM14
greenyellow	0.571091	2.76412e-05	0.418837	0.00338841	Colon_ALL	ILMN_1713993	UBAC2
brown	0.813869	3.52625e-12	0.483826	0.000570063	Colon_ALL	ILMN_1714083	KLHL8
brown	0.612322	4.78547e-06	0.464171	0.00101439	Colon_ALL	ILMN_1714349	GLCE
green	0.883429	2.03621e-16	0.459833	0.00114677	Colon_ALL	ILMN_1714384	PCCA
purple	0.731126	5.35109e-09	0.474172	0.00075982	Colon_ALL	ILMN_1714438
red	0.489965	0.000472745	0.567873	3.13859e-05	Colon_ALL	ILMN_1714988	HOXD8
turquoise	0.778465	1.18673e-10	0.426123	0.00282191	Colon_ALL	ILMN_1715175	MET
brown	0.669895	2.60834e-07	0.562758	3.83077e-05	Colon_ALL	ILMN_1715452	FREM1
greenyellow	0.483631	0.000573416	0.444591	0.00174262	Colon_ALL	ILMN_1715458	PCDH10
brown	0.67772	1.6712e-07	0.448221	0.00158009	Colon_ALL	ILMN_1715635	ATP6V0E1
tan	0.712621	1.92369e-08	0.451577	0.00144192	Colon_ALL	ILMN_1715715	CEBPA
brown	0.814604	3.25267e-12	0.519532	0.000182389	Colon_ALL	ILMN_1715931	ISCA1
turquoise	0.470256	0.000851745	0.473132	0.000783336	Colon_ALL	ILMN_1716247	FIBIN
black	0.6993	4.5515e-08	0.429932	0.00256045	Colon_ALL	ILMN_1716309	EGFL6
blue	0.780094	1.02405e-10	0.437477	0.00210484	Colon_ALL	ILMN_1716368	PRIMPOL
green	0.528391	0.000134746	0.415099	0.00371616	Colon_ALL	ILMN_1716461	LGI4
brown	0.685449	1.0622e-07	0.464675	0.00099995	Colon_ALL	ILMN_1716790	APBB2
brown	0.756113	7.97704e-10	0.478683	0.000665045	Colon_ALL	ILMN_1716797	CD302
blue	0.58828	1.36995e-05	0.615712	4.09704e-06	Colon_ALL	ILMN_1716815	CEACAM1
salmon	0.773499	1.84602e-10	0.476421	0.000711154	Colon_ALL	ILMN_1717163	F13A1
purple	0.772052	2.09535e-10	0.446908	0.00163727	Colon_ALL	ILMN_1717809	RNF24
brown	0.875771	7.84064e-16	0.432702	0.00238393	Colon_ALL	ILMN_1717853	DMGDH
green	0.790924	3.71953e-11	0.451694	0.00143731	Colon_ALL	ILMN_1718769	ITSN1
blue	0.495653	0.000396236	0.417735	0.00348229	Colon_ALL	ILMN_1718808	AKAP10
brown	0.586276	1.48982e-05	0.420619	0.00324134	Colon_ALL	ILMN_1718853	UQCRC2
green	0.8538	2.40379e-14	0.420967	0.0032133	Colon_ALL	ILMN_1718924	ETFA
brown	0.606961	6.09571e-06	0.568079	3.11337e-05	Colon_ALL	ILMN_1718982	BEST1
brown	0.711829	2.02742e-08	0.425379	0.00287567	Colon_ALL	ILMN_1719032	LSM3
greenyellow	0.78612	5.87114e-11	0.671803	2.34296e-07	Colon_ALL	ILMN_1719205	FBL
brown	0.573321	2.52911e-05	0.459666	0.00115216	Colon_ALL	ILMN_1719864	PACS2
tan	0.676247	1.8191e-07	0.412384	0.00397131	Colon_ALL	ILMN_1720053	ZFAND3
brown	0.784659	6.72974e-11	0.503489	0.000309097	Colon_ALL	ILMN_1720303	OSTM1
brown	0.632754	1.82402e-06	0.42209	0.00312424	Colon_ALL	ILMN_1720430	PPDPF
turquoise	0.45501	0.00131184	0.457327	0.00123008	Colon_ALL	ILMN_1720501	ABCA9
greenyellow	0.669625	2.64823e-07	0.637839	1.41904e-06	Colon_ALL	ILMN_1720513	SETBP1
brown	0.683319	1.20516e-07	0.409659	0.00424276	Colon_ALL	ILMN_1720703	SLC25A3
green	0.58632	1.48715e-05	0.441277	0.00190386	Colon_ALL	ILMN_1720799	TECR
yellow	0.787432	5.18883e-11	0.412666	0.00394416	Colon_ALL	ILMN_1720889	MSMO1
greenyellow	0.500326	0.00034193	0.436422	0.00216386	Colon_ALL	ILMN_1721128	TOMM34
black	0.760355	5.6455e-10	0.420906	0.00321818	Colon_ALL	ILMN_1721713	EXOSC9
brown	0.621206	3.17276e-06	0.477563	0.00068753	Colon_ALL	ILMN_1722642	REEP3
yellow	0.650269	7.53339e-07	0.420031	0.00328928	Colon_ALL	ILMN_1722648	SF3B4
black	0.921089	4.70363e-20	0.459803	0.00114772	Colon_ALL	ILMN_1722809	NRCAM
pink	0.67758	1.68474e-07	0.496468	0.000386234	Colon_ALL	ILMN_1723177	ANAPC5
brown	0.76648	3.38364e-10	0.550984	5.98659e-05	Colon_ALL	ILMN_1723198	CDKN2B
turquoise	0.698505	4.78429e-08	0.449066	0.00154425	Colon_ALL	ILMN_1723678	PRPH
yellow	0.551023	5.97788e-05	0.441678	0.00188368	Colon_ALL	ILMN_1723846	TSFM
black	0.751116	1.18806e-09	0.408404	0.0043731	Colon_ALL	ILMN_1724540	ALX1
tan	0.726783	7.29258e-09	0.529425	0.000129998	Colon_ALL	ILMN_1725241	GSTK1
salmon	0.748511	1.45697e-09	0.464562	0.00100316	Colon_ALL	ILMN_1725320	SIGLEC1
turquoise	0.862232	6.93047e-15	0.426825	0.002772	Colon_ALL	ILMN_1725417	NELL2
blue	0.678264	1.61939e-07	0.427046	0.00275648	Colon_ALL	ILMN_1725678	GFRA1
blue	0.464651	0.00100061	0.443831	0.00177851	Colon_ALL	ILMN_1725791	HACD1
brown	0.448194	0.00158125	0.486476	0.000526036	Colon_ALL	ILMN_1726245	TGFBR2
purple	0.697761	5.01256e-08	0.402711	0.00500966	Colon_ALL	ILMN_1726456	SLC3A2
purple	0.770504	2.39688e-10	0.482066	0.000601096	Colon_ALL	ILMN_1726520	TDP1
green	0.617522	3.76805e-06	0.517566	0.00019484	Colon_ALL	ILMN_1726981	VEGFB
green	0.762133	4.8733e-10	0.480941	0.000621718	Colon_ALL	ILMN_1727360	MAOB
blue	0.70054	4.20903e-08	0.421866	0.0031418	Colon_ALL	ILMN_1727390	ATPAF2
brown	0.601539	7.75171e-06	0.433632	0.00232716	Colon_ALL	ILMN_1727855	PEMT
turquoise	0.441605	0.00188731	0.426316	0.00280813	Colon_ALL	ILMN_1727923	ZNF140
blue	0.528147	0.00013589	0.454582	0.00132749	Colon_ALL	ILMN_1727992	FEZ1
blue	0.623405	2.86023e-06	0.584661	1.59341e-05	Colon_ALL	ILMN_1728011	NLGN4X
brown	0.46939	0.000873355	0.440044	0.00196709	Colon_ALL	ILMN_1728024	TUBG1
brown	0.644986	9.89418e-07	0.515029	0.000212054	Colon_ALL	ILMN_1728132	LDHB
brown	0.744874	1.92927e-09	0.401266	0.00518356	Colon_ALL	ILMN_1728467	GHITM
brown	0.64806	8.44839e-07	0.479262	0.000653696	Colon_ALL	ILMN_1728514	BAG5
brown	0.780352	1.00025e-10	0.510481	0.000246396	Colon_ALL	ILMN_1728975	SCO1
brown	0.743625	2.12215e-09	0.439755	0.00198223	Colon_ALL	ILMN_1729095	PDZD2
brown	0.650144	7.58257e-07	0.412073	0.00400149	Colon_ALL	ILMN_1729130	TMEM248
greenyellow	0.414391	0.00378127	0.460913	0.00111245	Colon_ALL	ILMN_1729203	PDILT
purple	0.73304	4.66005e-09	0.446443	0.00165792	Colon_ALL	ILMN_1729288	C1QTNF6
blue	0.447245	0.0016224	0.510161	0.000248995	Colon_ALL	ILMN_1729368	FZD8
turquoise	0.599452	8.49297e-06	0.400802	0.00524045	Colon_ALL	ILMN_1729487	GMPR
brown	0.448862	0.0015528	0.410518	0.00415553	Colon_ALL	ILMN_1729563	UGDH
greenyellow	0.614958	4.24181e-06	0.461331	0.00109941	Colon_ALL	ILMN_1729980	RNF216
blue	0.717558	1.3809e-08	0.42214	0.00312025	Colon_ALL	ILMN_1730464	DNAL1
brown	0.610079	5.29825e-06	0.491877	0.000445661	Colon_ALL	ILMN_1730611	RTN4
purple	0.774614	1.67329e-10	0.565398	3.45776e-05	Colon_ALL	ILMN_1730734	TMEM205
brown	0.799434	1.60851e-11	0.453827	0.00135544	Colon_ALL	ILMN_1731194	STRAP
brown	0.572417	2.62209e-05	0.776877	1.36845e-10	Colon_ALL	ILMN_1731349	HOXA13
blue	0.646755	9.03632e-07	0.475991	0.000720251	Colon_ALL	ILMN_1731518	PLD6
brown	0.63269	1.82974e-06	0.435842	0.00219698	Colon_ALL	ILMN_1731688	KLB
yellow	0.468973	0.000883936	0.524531	0.000153905	Colon_ALL	ILMN_1731783	ATP1A1
blue	0.780127	1.02098e-10	0.444015	0.00176977	Colon_ALL	ILMN_1731891	UBXN8
brown	0.624457	2.72108e-06	0.645895	9.44442e-07	Colon_ALL	ILMN_1731966	LEPR
turquoise	0.547525	6.80404e-05	0.440596	0.00193854	Colon_ALL	ILMN_1732410	SLC16A9
red	0.683762	1.17403e-07	0.432589	0.00239092	Colon_ALL	ILMN_1732538	LBP
salmon	0.766991	3.2398e-10	0.423267	0.00303319	Colon_ALL	ILMN_1732919	LILRB5
brown	0.614412	4.34936e-06	0.420168	0.00327804	Colon_ALL	ILMN_1733666	BLOC1S6
brown	0.582191	1.76471e-05	0.61277	4.6888e-06	Colon_ALL	ILMN_1733756	COL12A1
green	0.704623	3.24451e-08	0.526345	0.000144611	Colon_ALL	ILMN_1733937	MMD
turquoise	0.707413	2.70895e-08	0.451874	0.00143026	Colon_ALL	ILMN_1734190	TCEAL3
yellow	0.565352	3.46398e-05	0.457028	0.00124035	Colon_ALL	ILMN_1734288	DUSP18
purple	0.744663	1.96066e-09	0.499475	0.000351285	Colon_ALL	ILMN_1734542	OVGP1
blue	0.515935	0.000205755	0.419083	0.00336777	Colon_ALL	ILMN_1734600	WWOX
greenyellow	0.407631	0.00445519	0.51255	0.000230195	Colon_ALL	ILMN_1734781	IFNE
brown	0.782414	8.28352e-11	0.478939	0.000660011	Colon_ALL	ILMN_1734895	SFT2D1
brown	0.708117	2.58767e-08	0.414506	0.00377058	Colon_ALL	ILMN_1735220	CAV2
blue	0.575224	2.34324e-05	0.535544	0.000104874	Colon_ALL	ILMN_1736054	SUB1
brown	0.718178	1.32391e-08	0.64135	1.19004e-06	Colon_ALL	ILMN_1736103	ITPR2
black	0.638474	1.37481e-06	0.601111	7.89851e-06	Colon_ALL	ILMN_1736242	PLEKHG4
brown	0.611348	5.0024e-06	0.46563	0.000973052	Colon_ALL	ILMN_1736510	FOXN2
brown	0.449193	0.0015389	0.469878	0.000861109	Colon_ALL	ILMN_1736546	SLC16A14
green	0.539109	9.23641e-05	0.52482	0.000152386	Colon_ALL	ILMN_1736751	VPS26B
brown	0.51066	0.000244955	0.445348	0.00170758	Colon_ALL	ILMN_1737076	HHLA2
blue	0.645039	9.86761e-07	0.455813	0.00128297	Colon_ALL	ILMN_1737168	THTPA
brown	0.633477	1.76054e-06	0.506033	0.000284784	Colon_ALL	ILMN_1737343	FNIP1
green	0.624696	2.69034e-06	0.458704	0.00118364	Colon_ALL	ILMN_1737574	TMLHE
brown	0.666767	3.10501e-07	0.772914	1.94318e-10	Colon_ALL	ILMN_1738132	HOXA11
brown	0.641633	1.17316e-06	0.411387	0.00406877	Colon_ALL	ILMN_1738368	RREB1
green	0.609416	5.45928e-06	0.407246	0.00449656	Colon_ALL	ILMN_1738494	AQP7
brown	0.730167	5.73281e-09	0.440306	0.00195353	Colon_ALL	ILMN_1738589	MGLL
blue	0.805967	8.22111e-12	0.439247	0.002009	Colon_ALL	ILMN_1738750	TFCP2
purple	0.736562	3.60177e-09	0.411969	0.00401167	Colon_ALL	ILMN_1738767	PLP2
brown	0.6894	8.38075e-08	0.612705	4.70281e-06	Colon_ALL	ILMN_1739103	MPZL1
brown	0.850595	3.77955e-14	0.668014	2.89737e-07	Colon_ALL	ILMN_1739161	PLPP1
purple	0.53819	9.54502e-05	0.694613	6.09508e-08	Colon_ALL	ILMN_1739576	CYB5R2
red	0.716987	1.43534e-08	0.53553	0.000104928	Colon_ALL	ILMN_1739582	HOXA9
blue	0.819683	1.8433e-12	0.406036	0.00462867	Colon_ALL	ILMN_1739683	LRRC6
brown	0.612573	4.73103e-06	0.517311	0.000196515	Colon_ALL	ILMN_1739719	ASPH
yellow	0.744053	2.05404e-09	0.54133	8.52735e-05	Colon_ALL	ILMN_1740185	TPMT
purple	0.802046	1.23353e-11	0.488115	0.000500366	Colon_ALL	ILMN_1740265	ACOT7
greenyellow	0.550547	6.08458e-05	0.416606	0.00358079	Colon_ALL	ILMN_1740466	TENT5A
blue	0.65153	7.05312e-07	0.551162	5.94712e-05	Colon_ALL	ILMN_1740717	ADH1C
brown	0.542466	8.18434e-05	0.420307	0.00326666	Colon_ALL	ILMN_1741331	AP5M1
salmon	0.812547	4.07413e-12	0.422818	0.0030676	Colon_ALL	ILMN_1741712	MS4A4A
brown	0.551398	5.89499e-05	0.508032	0.000266912	Colon_ALL	ILMN_1741971	MYORG
brown	0.620759	3.24005e-06	0.440318	0.00195288	Colon_ALL	ILMN_1741985	BBS10
green	0.811077	4.77722e-12	0.52098	0.000173682	Colon_ALL	ILMN_1742044	GNAI1
brown	0.703953	3.38703e-08	0.590336	1.25625e-05	Colon_ALL	ILMN_1742187	MAN1A1
green	0.698144	4.8939e-08	0.525437	0.000149196	Colon_ALL	ILMN_1742250	CCNH
greenyellow	0.887639	9.31606e-17	0.594075	1.07145e-05	Colon_ALL	ILMN_1742379	IFT122
blue	0.668356	2.8427e-07	0.415804	0.00365225	Colon_ALL	ILMN_1742611	C1orf52
purple	0.791237	3.60912e-11	0.537738	9.70022e-05	Colon_ALL	ILMN_1743432	DGUOK
brown	0.805884	8.29264e-12	0.529316	0.000130488	Colon_ALL	ILMN_1743711	XPOT
purple	0.428108	0.00268286	0.415676	0.00366383	Colon_ALL	ILMN_1743763	TJAP1
brown	0.690864	7.66902e-08	0.566419	3.3227e-05	Colon_ALL	ILMN_1743784	SHMT1
brown	0.547099	6.91163e-05	0.496268	0.000388664	Colon_ALL	ILMN_1743966	BCL9L
green	0.697468	5.10514e-08	0.432816	0.00237693	Colon_ALL	ILMN_1744210
brown	0.703056	3.5872e-08	0.480534	0.000629337	Colon_ALL	ILMN_1744244	DPAGT1
green	0.73319	4.60954e-09	0.567024	3.24494e-05	Colon_ALL	ILMN_1744949	RHOBTB3
brown	0.825262	9.67466e-13	0.503857	0.000305468	Colon_ALL	ILMN_1745076	CLINT1
greenyellow	0.746117	1.75357e-09	0.548543	6.55343e-05	Colon_ALL	ILMN_1745329	PRR14
brown	0.873582	1.13401e-15	0.565223	3.4814e-05	Colon_ALL	ILMN_1745813	KIF1BP
purple	0.618165	3.65733e-06	0.420425	0.00325705	Colon_ALL	ILMN_1746013	SPOCK1
blue	0.63281	1.81903e-06	0.425699	0.00285246	Colon_ALL	ILMN_1746362	LIMS3
brown	0.864783	4.68045e-15	0.444957	0.00172561	Colon_ALL	ILMN_1746494	FNTA
green	0.777326	1.31457e-10	0.415155	0.00371105	Colon_ALL	ILMN_1746561	BCL2L2
pink	0.503014	0.000313839	0.427506	0.00272435	Colon_ALL	ILMN_1746712	TSHR
brown	0.743867	2.08343e-09	0.551166	5.9462e-05	Colon_ALL	ILMN_1746763	ECM2
brown	0.663348	3.74805e-07	0.439676	0.00198634	Colon_ALL	ILMN_1746856	RAB21
brown	0.661485	4.14839e-07	0.40145	0.00516109	Colon_ALL	ILMN_1746888	PCOLCE2
blue	0.674226	2.04202e-07	0.413341	0.00387968	Colon_ALL	ILMN_1747183	GXYLT1
brown	0.715414	1.59601e-08	0.469133	0.000879873	Colon_ALL	ILMN_1747244	CCNG2
brown	0.716735	1.46002e-08	0.540318	8.84394e-05	Colon_ALL	ILMN_1747627	ABCA2
brown	0.574535	2.40902e-05	0.468378	0.000899237	Colon_ALL	ILMN_1747716	ALDOB
turquoise	0.606765	6.14957e-06	0.430708	0.00250985	Colon_ALL	ILMN_1747934	ISYNA1
greenyellow	0.58262	1.7338e-05	0.540343	8.83592e-05	Colon_ALL	ILMN_1748093	PAFAH1B3
turquoise	0.719167	1.23762e-08	0.472114	0.000806965	Colon_ALL	ILMN_1748538	ALDH1A2
purple	0.826182	8.67983e-13	0.405798	0.00465507	Colon_ALL	ILMN_1748651	PSMB3
brown	0.644944	9.91586e-07	0.505862	0.000286361	Colon_ALL	ILMN_1748755	KCND2
brown	0.701536	3.95171e-08	0.500312	0.000342089	Colon_ALL	ILMN_1748908	PLPBP
green	0.833579	3.54345e-13	0.490907	0.000459221	Colon_ALL	ILMN_1748983	RTN4
brown	0.573428	2.51828e-05	0.52933	0.000130428	Colon_ALL	ILMN_1749009	REXO2
yellow	0.693658	6.46451e-08	0.44519	0.00171481	Colon_ALL	ILMN_1749213	SDF2L1
turquoise	0.604348	6.84788e-06	0.48134	0.000614342	Colon_ALL	ILMN_1749478	TCEAL3
green	0.832551	4.0239e-13	0.491469	0.000451326	Colon_ALL	ILMN_1749583	ZNF777
brown	0.770135	2.47464e-10	0.556722	4.82623e-05	Colon_ALL	ILMN_1750145	YWHAG
brown	0.842046	1.20244e-13	0.543266	7.95027e-05	Colon_ALL	ILMN_1750394	SLC39A6
brown	0.724025	8.84986e-09	0.41866	0.00340336	Colon_ALL	ILMN_1750969	FAM120AOS
brown	0.638033	1.40541e-06	0.56588	3.39341e-05	Colon_ALL	ILMN_1751120	HIST1H4H
brown	0.515664	0.000207624	0.419959	0.00329519	Colon_ALL	ILMN_1751234	C1GALT1C1
brown	0.684677	1.11205e-07	0.442181	0.00185859	Colon_ALL	ILMN_1751452	NDFIP1
brown	0.736826	3.53228e-09	0.453667	0.00136143	Colon_ALL	ILMN_1751708	ITM2B
brown	0.734587	4.16352e-09	0.40947	0.00426213	Colon_ALL	ILMN_1751811	PLGLB2
turquoise	0.816396	2.66747e-12	0.401325	0.00517627	Colon_ALL	ILMN_1751886	REC8
yellow	0.674835	1.9723e-07	0.461371	0.00109817	Colon_ALL	ILMN_1752226	P2RY11
brown	0.610351	5.23344e-06	0.477026	0.000698557	Colon_ALL	ILMN_1752589	TMEM183A
blue	0.705966	2.97551e-08	0.486388	0.00052744	Colon_ALL	ILMN_1752591	LEPROTL1
turquoise	0.55624	4.91516e-05	0.439209	0.002011	Colon_ALL	ILMN_1752965	GREM1
purple	0.853183	2.62499e-14	0.492397	0.000438537	Colon_ALL	ILMN_1754220	SF3A2
brown	0.643692	1.05691e-06	0.437602	0.00209796	Colon_ALL	ILMN_1754279	FBXW7
purple	0.822973	1.26386e-12	0.50575	0.000287398	Colon_ALL	ILMN_1754529	SPG7
greenyellow	0.693182	6.65622e-08	0.514158	0.000218278	Colon_ALL	ILMN_1754655	TTLL5
green	0.568429	3.07075e-05	0.438281	0.00206084	Colon_ALL	ILMN_1754864	SLC25A18
turquoise	0.481791	0.000606085	0.410012	0.00420672	Colon_ALL	ILMN_1755051	EFHC1
greenyellow	0.613803	4.47249e-06	0.529649	0.000128987	Colon_ALL	ILMN_1755234	SSH3
greenyellow	0.561148	4.07601e-05	0.51592	0.000205861	Colon_ALL	ILMN_1755405	PGAP2
yellow	0.457462	0.00122545	0.570706	2.80669e-05	Colon_ALL	ILMN_1755536	PFDN5
blue	0.736196	3.70038e-09	0.512115	0.00023352	Colon_ALL	ILMN_1755589	DIP2B
yellow	0.423962	0.00298055	0.503768	0.000306344	Colon_ALL	ILMN_1755649	SLC16A5
greenyellow	0.791195	3.62374e-11	0.483823	0.000570099	Colon_ALL	ILMN_1755737	TRABD
greenyellow	0.439113	0.00201611	0.551731	5.82228e-05	Colon_ALL	ILMN_1756439	SCRN1
purple	0.674846	1.97108e-07	0.430275	0.00253796	Colon_ALL	ILMN_1756920	ADAM15
brown	0.539653	9.0579e-05	0.468236	0.000902946	Colon_ALL	ILMN_1756928	RTN1
turquoise	0.752534	1.06208e-09	0.469266	0.000876497	Colon_ALL	ILMN_1756992	MUC1
brown	0.664095	3.59768e-07	0.509593	0.000253664	Colon_ALL	ILMN_1756999	RBL2
brown	0.694056	6.30801e-08	0.456026	0.00127541	Colon_ALL	ILMN_1757074	GNG10
brown	0.728505	6.4547e-09	0.467572	0.000920351	Colon_ALL	ILMN_1757272	THAP1
purple	0.499046	0.000356094	0.504778	0.000296554	Colon_ALL	ILMN_1757604	TPM2
purple	0.485235	0.000546259	0.407225	0.00449876	Colon_ALL	ILMN_1757634	FAM20C
black	0.468587	0.00089384	0.450162	0.00149881	Colon_ALL	ILMN_1757995	PARP2
green	0.799956	1.52588e-11	0.448809	0.00155507	Colon_ALL	ILMN_1758034	ETFDH
brown	0.752516	1.06362e-09	0.466597	0.000946492	Colon_ALL	ILMN_1758232	GGCX
salmon	0.809436	5.69668e-12	0.421159	0.00319788	Colon_ALL	ILMN_1758315	SLC9A9
turquoise	0.790762	3.77804e-11	0.448324	0.00157565	Colon_ALL	ILMN_1758731	CYP2J2
green	0.690943	7.63195e-08	0.435839	0.00219715	Colon_ALL	ILMN_1758846	ANKRD40
greenyellow	0.465188	0.000985427	0.473681	0.000770843	Colon_ALL	ILMN_1759030	MAP4K5
greenyellow	0.779334	1.09707e-10	0.617285	3.80971e-06	Colon_ALL	ILMN_1759184	C19orf48
brown	0.655797	5.63142e-07	0.501456	0.000329853	Colon_ALL	ILMN_1759232	IRS1
greenyellow	0.579449	1.97459e-05	0.645317	9.72822e-07	Colon_ALL	ILMN_1759598	DLX5
brown	0.560252	4.21869e-05	0.467087	0.000933279	Colon_ALL	ILMN_1759633	REPS2
greenyellow	0.503265	0.000311326	0.425172	0.0028908	Colon_ALL	ILMN_1760049	SERGEF
blue	0.794254	2.69177e-11	0.53622	0.000102388	Colon_ALL	ILMN_1760180	MID2
black	0.698741	4.71418e-08	0.421407	0.00317814	Colon_ALL	ILMN_1761113	GNL2
brown	0.641956	1.15419e-06	0.671704	2.35612e-07	Colon_ALL	ILMN_1761119	KRTAP13-4
brown	0.752042	1.1043e-09	0.465634	0.000972951	Colon_ALL	ILMN_1761363	VAMP4
blue	0.41122	0.00408536	0.510993	0.000242297	Colon_ALL	ILMN_1761456	ALG13
tan	0.749558	1.34265e-09	0.459729	0.00115013	Colon_ALL	ILMN_1761804	ALDH9A1
blue	0.796246	2.21219e-11	0.430847	0.00250093	Colon_ALL	ILMN_1762071	C17orf80
brown	0.734402	4.22012e-09	0.470115	0.000855219	Colon_ALL	ILMN_1762231	ZEB1
greenyellow	0.586781	1.45873e-05	0.518296	0.000190129	Colon_ALL	ILMN_1762281	DCTN3
brown	0.686275	1.01117e-07	0.416419	0.00359734	Colon_ALL	ILMN_1762606	AQP11
blue	0.684656	1.11348e-07	0.500094	0.000344464	Colon_ALL	ILMN_1762639	MED11
brown	0.684547	1.1207e-07	0.40831	0.00438305	Colon_ALL	ILMN_1762766	PTPRA
purple	0.773906	1.78116e-10	0.534298	0.0001096	Colon_ALL	ILMN_1763080	QARS
blue	0.664388	3.54037e-07	0.456202	0.00126918	Colon_ALL	ILMN_1763137	INVS
greenyellow	0.706904	2.80011e-08	0.551308	5.91483e-05	Colon_ALL	ILMN_1763460	SNU13
brown	0.502317	0.000320919	0.535462	0.000105181	Colon_ALL	ILMN_1763670	TM2D1
purple	0.912218	4.70092e-19	0.420412	0.00325813	Colon_ALL	ILMN_1763688	C17orf49
purple	0.647615	8.6447e-07	0.447324	0.00161892	Colon_ALL	ILMN_1763765	RAD1
brown	0.788101	4.87065e-11	0.405382	0.00470154	Colon_ALL	ILMN_1763972	TJP2
brown	0.775714	1.51787e-10	0.466123	0.000959424	Colon_ALL	ILMN_1764087	SYPL1
brown	0.652892	6.56679e-07	0.408716	0.00434043	Colon_ALL	ILMN_1764098	TRNT1
turquoise	0.483033	0.000583866	0.46967	0.000866305	Colon_ALL	ILMN_1764158	NLGN2
green	0.707009	2.78096e-08	0.48713	0.000515654	Colon_ALL	ILMN_1764207	RPRD1A
blue	0.680709	1.40476e-07	0.466691	0.00094394	Colon_ALL	ILMN_1764231	LMO3
brown	0.587128	1.43777e-05	0.45761	0.00122041	Colon_ALL	ILMN_1764329	CFAP298
turquoise	0.552365	5.68622e-05	0.490305	0.000467828	Colon_ALL	ILMN_1764571	ARHGAP23
greenyellow	0.479512	0.000648841	0.457873	0.00121148	Colon_ALL	ILMN_1764764	PWWP3A
green	0.708572	2.51188e-08	0.488874	0.000488867	Colon_ALL	ILMN_1764871	PIGP
brown	0.586618	1.46875e-05	0.437996	0.00207635	Colon_ALL	ILMN_1765232	RNLS
green	0.519424	0.000183054	0.468349	0.00089999	Colon_ALL	ILMN_1765326	DGKD
turquoise	0.502259	0.000321512	0.412652	0.00394542	Colon_ALL	ILMN_1765796	ENO2
blue	0.638316	1.38571e-06	0.420395	0.00325954	Colon_ALL	ILMN_1765876	ARHGAP24
yellow	0.69968	4.44384e-08	0.421473	0.00317289	Colon_ALL	ILMN_1766010	YARS
green	0.558336	4.53911e-05	0.403202	0.00495177	Colon_ALL	ILMN_1766054	ABCA1
black	0.543573	7.86197e-05	0.409299	0.0042798	Colon_ALL	ILMN_1766090	XYLT1
green	0.49344	0.000424562	0.460596	0.00112241	Colon_ALL	ILMN_1766713	HSPD1
tan	0.785503	6.22011e-11	0.401638	0.00513821	Colon_ALL	ILMN_1766814	TK2
brown	0.705529	3.06059e-08	0.416645	0.00357737	Colon_ALL	ILMN_1766851	TMEM126B
blue	0.462294	0.00106988	0.740631	2.66116e-09	Colon_ALL	ILMN_1767129	ABCC8
brown	0.666216	3.20119e-07	0.473729	0.000769766	Colon_ALL	ILMN_1767256	MBTPS1
brown	0.646703	9.06084e-07	0.611083	5.06279e-06	Colon_ALL	ILMN_1767448	LHFPL6
brown	0.464165	0.00101457	0.471062	0.000832046	Colon_ALL	ILMN_1767470	SCPEP1
blue	0.452051	0.00142331	0.412205	0.00398869	Colon_ALL	ILMN_1767685	SERPINB7
brown	0.571837	2.68336e-05	0.576602	2.21658e-05	Colon_ALL	ILMN_1767766	PRDX2
greenyellow	0.580344	1.90367e-05	0.468696	0.000891031	Colon_ALL	ILMN_1767894	POLB
greenyellow	0.563324	3.74793e-05	0.490271	0.00046832	Colon_ALL	ILMN_1768425	TF
brown	0.488488	0.00049468	0.420614	0.00324176	Colon_ALL	ILMN_1769082	TXNDC5
brown	0.782455	8.2518e-11	0.447703	0.00160243	Colon_ALL	ILMN_1769155	CYP2C8
brown	0.748906	1.41285e-09	0.433598	0.00232922	Colon_ALL	ILMN_1769191	GNAS
brown	0.591431	1.19929e-05	0.470915	0.000835617	Colon_ALL	ILMN_1769390	ABHD15
brown	0.632047	1.88808e-06	0.560034	4.25404e-05	Colon_ALL	ILMN_1769601	TBCK
greenyellow	0.662696	3.88383e-07	0.423772	0.00299484	Colon_ALL	ILMN_1769634	CENPX
purple	0.646082	9.35408e-07	0.430526	0.00252164	Colon_ALL	ILMN_1769637	RNMT
brown	0.444253	0.00175851	0.43779	0.00208759	Colon_ALL	ILMN_1769783	ZDHHC2
turquoise	0.456675	0.0012526	0.41051	0.00415627	Colon_ALL	ILMN_1770206	GEMIN4
brown	0.668347	2.84416e-07	0.723655	9.08082e-09	Colon_ALL	ILMN_1770247
brown	0.853109	2.65278e-14	0.639793	1.28703e-06	Colon_ALL	ILMN_1770466	ATP5MC3
turquoise	0.443495	0.00179457	0.452706	0.00139795	Colon_ALL	ILMN_1770865	TRIM46
salmon	0.590019	1.27318e-05	0.617535	3.76592e-06	Colon_ALL	ILMN_1770922	TMEM45A
green	0.590046	1.27172e-05	0.41981	0.00330743	Colon_ALL	ILMN_1770936	COQ5
brown	0.430814	0.002503	0.408164	0.00439847	Colon_ALL	ILMN_1771376	PEA15
magenta	0.680421	1.42863e-07	0.40227	0.00506219	Colon_ALL	ILMN_1771593	RRM1
brown	0.672194	2.2917e-07	0.402695	0.00501156	Colon_ALL	ILMN_1771601	UFSP1
brown	0.77426	1.72637e-10	0.521926	0.000168196	Colon_ALL	ILMN_1771689	EXD2
blue	0.484755	0.000554253	0.40601	0.00463164	Colon_ALL	ILMN_1772124	ATRN
turquoise	0.662176	3.99538e-07	0.514361	0.000216809	Colon_ALL	ILMN_1772312	BARX1
brown	0.486489	0.000525824	0.479128	0.000656308	Colon_ALL	ILMN_1772370	ARHGEF1
brown	0.650096	7.60163e-07	0.443869	0.0017767	Colon_ALL	ILMN_1772540	ATMIN
red	0.615939	4.05442e-06	0.4479	0.00159388	Colon_ALL	ILMN_1772612	ANGPTL2
purple	0.775658	1.52545e-10	0.469541	0.000869559	Colon_ALL	ILMN_1772713	BMS1
brown	0.817309	2.40895e-12	0.414991	0.003726	Colon_ALL	ILMN_1772786	KIF16B
green	0.753154	1.01106e-09	0.496787	0.000382379	Colon_ALL	ILMN_1772929	ATP5PF
brown	0.799248	1.63884e-11	0.512464	0.000230849	Colon_ALL	ILMN_1772946	STRN3
blue	0.493635	0.000422	0.421998	0.00313144	Colon_ALL	ILMN_1773002	SKIDA1
green	0.846155	6.95466e-14	0.50638	0.000281608	Colon_ALL	ILMN_1773063	OSBPL1A
brown	0.847164	6.06509e-14	0.617302	3.8067e-06	Colon_ALL	ILMN_1773427	KANK1
turquoise	0.492347	0.000439214	0.411914	0.00401706	Colon_ALL	ILMN_1773470	ST5
yellow	0.672956	2.19495e-07	0.458424	0.00119296	Colon_ALL	ILMN_1773865	HSPA5
purple	0.579236	1.99177e-05	0.763613	4.30811e-10	Colon_ALL	ILMN_1774077	GBP2
purple	0.647893	8.52148e-07	0.505958	0.000285471	Colon_ALL	ILMN_1774086	CBX3
brown	0.627777	2.32187e-06	0.444183	0.00176183	Colon_ALL	ILMN_1774565	KAAG1
brown	0.705051	3.15637e-08	0.432641	0.00238769	Colon_ALL	ILMN_1774584	ATRAID
purple	0.685611	1.05199e-07	0.484806	0.000553398	Colon_ALL	ILMN_1774589	IQCC
purple	0.731214	5.31739e-09	0.406375	0.00459139	Colon_ALL	ILMN_1774661	SNRPB
purple	0.836091	2.5878e-13	0.50069	0.000337995	Colon_ALL	ILMN_1774890	LAS1L
purple	0.869406	2.25088e-15	0.51683	0.000199699	Colon_ALL	ILMN_1775703	TRAPPC6A
brown	0.78688	5.46622e-11	0.473164	0.000782589	Colon_ALL	ILMN_1776102	PSMD10
brown	0.826315	8.5442e-13	0.541331	8.52692e-05	Colon_ALL	ILMN_1776105	PSPH
yellow	0.441285	0.00190341	0.567355	3.2031e-05	Colon_ALL	ILMN_1776109	ZNF622
turquoise	0.607792	5.87295e-06	0.477626	0.000686252	Colon_ALL	ILMN_1776395	ARMC4
greenyellow	0.628029	2.29385e-06	0.42771	0.00271025	Colon_ALL	ILMN_1776490	C17orf53
brown	0.655239	5.80103e-07	0.437482	0.0021046	Colon_ALL	ILMN_1776888	RHOXF1
blue	0.525662	0.000148051	0.504369	0.000300481	Colon_ALL	ILMN_1776963	LMAN2
black	0.739591	2.8767e-09	0.610781	5.13252e-06	Colon_ALL	ILMN_1777397	MSX1
purple	0.897679	1.26412e-17	0.538069	9.58654e-05	Colon_ALL	ILMN_1777765	C12orf10
brown	0.54131	8.53362e-05	0.517929	0.000192489	Colon_ALL	ILMN_1778168	ELMO2
turquoise	0.533662	0.000112085	0.400857	0.00523369	Colon_ALL	ILMN_1778213	STK33
blue	0.653804	6.25872e-07	0.402756	0.00500426	Colon_ALL	ILMN_1778316	NOM1
brown	0.668624	2.80061e-07	0.491039	0.000457349	Colon_ALL	ILMN_1778543	DHFR
turquoise	0.407361	0.00448409	0.447717	0.00160181	Colon_ALL	ILMN_1778755	TRIL
black	0.453598	0.00136401	0.438167	0.002067	Colon_ALL	ILMN_1778917	CDK7
brown	0.673345	2.14709e-07	0.461384	0.00109776	Colon_ALL	ILMN_1779356	TP53
greenyellow	0.44113	0.00191131	0.419906	0.0032995	Colon_ALL	ILMN_1779428	CCDC184
tan	0.79249	3.19728e-11	0.436876	0.0021383	Colon_ALL	ILMN_1779515	CSAD
blue	0.667323	3.01089e-07	0.489778	0.000475472	Colon_ALL	ILMN_1779522	ZNF347
turquoise	0.621264	3.16411e-06	0.408346	0.00437919	Colon_ALL	ILMN_1779558	GAS6
brown	0.769364	2.64465e-10	0.49371	0.000421006	Colon_ALL	ILMN_1779633	PSMD6
yellow	0.570479	2.83204e-05	0.581238	1.83521e-05	Colon_ALL	ILMN_1779706	TP53BP2
brown	0.725543	7.95761e-09	0.457094	0.00123808	Colon_ALL	ILMN_1779800	MARK1
brown	0.596124	9.81107e-06	0.468874	0.000886472	Colon_ALL	ILMN_1779979	SLC37A3
brown	0.635659	1.58117e-06	0.445511	0.00170008	Colon_ALL	ILMN_1780292	MSH5-SAPCD1
green	0.520545	0.000176256	0.41134	0.00407343	Colon_ALL	ILMN_1780659	NUDT6
blue	0.410389	0.00416846	0.596321	9.72805e-06	Colon_ALL	ILMN_1781256	LEFTY2
red	0.747647	1.55816e-09	0.412729	0.0039381	Colon_ALL	ILMN_1781419	HIKESHI
brown	0.74296	2.23215e-09	0.47405	0.000762555	Colon_ALL	ILMN_1781431	GLCCI1
blue	0.545455	7.34086e-05	0.420179	0.00327711	Colon_ALL	ILMN_1781526	PPP1R8
brown	0.667224	3.02745e-07	0.431816	0.00243917	Colon_ALL	ILMN_1781680	DAP3
brown	0.756104	7.98267e-10	0.540549	8.77086e-05	Colon_ALL	ILMN_1781791	PRRG1
green	0.484582	0.000557179	0.465042	0.000989522	Colon_ALL	ILMN_1781897	KLRC3
brown	0.696563	5.40144e-08	0.511177	0.000240839	Colon_ALL	ILMN_1781952	MGST1
brown	0.684834	1.10173e-07	0.486195	0.000530556	Colon_ALL	ILMN_1782429	TLCD4
brown	0.773294	1.87953e-10	0.539125	9.23098e-05	Colon_ALL	ILMN_1782444	YIPF4
brown	0.652428	6.72876e-07	0.423718	0.00299894	Colon_ALL	ILMN_1782743	LETMD1
red	0.639791	1.28714e-06	0.473115	0.000783706	Colon_ALL	ILMN_1782761	ARHGAP20
brown	0.483468	0.000576258	0.48852	0.000494206	Colon_ALL	ILMN_1783182	FBN1
greenyellow	0.437283	0.00211561	0.437644	0.00209566	Colon_ALL	ILMN_1783287	S100A14
brown	0.440533	0.0019418	0.479308	0.0006528	Colon_ALL	ILMN_1783621	CMPK2
green	0.472582	0.000796011	0.472637	0.000794731	Colon_ALL	ILMN_1783681	MRPL34
greenyellow	0.430027	0.00255422	0.542737	8.10428e-05	Colon_ALL	ILMN_1783840	RFX8
brown	0.593279	1.10855e-05	0.706801	2.81891e-08	Colon_ALL	ILMN_1783956	ATP8B4
turquoise	0.456402	0.00126217	0.487148	0.000515378	Colon_ALL	ILMN_1784113	NAT14
turquoise	0.492208	0.00044111	0.432395	0.00240297	Colon_ALL	ILMN_1784217	SOX15
greenyellow	0.768794	2.77747e-10	0.510844	0.000243486	Colon_ALL	ILMN_1784227	MCRS1
greenyellow	0.68381	1.1707e-07	0.44726	0.00162175	Colon_ALL	ILMN_1784316	PCDHA9
turquoise	0.616562	3.93946e-06	0.414759	0.0037473	Colon_ALL	ILMN_1784749	GAS6
brown	0.79443	2.64568e-11	0.556305	4.90293e-05	Colon_ALL	ILMN_1784753	PAIP2
salmon	0.632719	1.82714e-06	0.407018	0.00452121	Colon_ALL	ILMN_1785071	SELENOP
turquoise	0.451305	0.0014527	0.477825	0.000682226	Colon_ALL	ILMN_1785330	SH3BP4
brown	0.68832	8.94506e-08	0.574984	2.36598e-05	Colon_ALL	ILMN_1785356	DENND5A
blue	0.78869	4.60596e-11	0.451824	0.00143219	Colon_ALL	ILMN_1785988	CSNK1A1
brown	0.66824	2.86108e-07	0.506608	0.00027954	Colon_ALL	ILMN_1786444	LPL
brown	0.603516	7.10479e-06	0.402996	0.00497594	Colon_ALL	ILMN_1786469	FBXO22
brown	0.743587	2.12838e-09	0.440069	0.00196581	Colon_ALL	ILMN_1786532	CNIH1
turquoise	0.533942	0.000110983	0.497844	0.000369866	Colon_ALL	ILMN_1787324	ENKD1
brown	0.61586	4.06912e-06	0.456299	0.00126576	Colon_ALL	ILMN_1788002	MAPK14
brown	0.693843	6.39112e-08	0.456462	0.00126005	Colon_ALL	ILMN_1788160	KIF5B
purple	0.813758	3.56965e-12	0.421082	0.00320403	Colon_ALL	ILMN_1788180	RAB13
blue	0.579806	1.946e-05	0.402532	0.00503087	Colon_ALL	ILMN_1788793	KLF8
blue	0.71326	1.84356e-08	0.504553	0.000298704	Colon_ALL	ILMN_1788988	THAP1
blue	0.737901	3.26232e-09	0.466413	0.000951492	Colon_ALL	ILMN_1789058	RNF207
brown	0.730727	5.50686e-09	0.412887	0.00392293	Colon_ALL	ILMN_1789095	BMPR2
brown	0.515334	0.000209914	0.599029	8.65085e-06	Colon_ALL	ILMN_1789136	SERF2
purple	0.534641	0.000108278	0.557551	4.67673e-05	Colon_ALL	ILMN_1789196	TPM2
purple	0.722063	1.01418e-08	0.521162	0.000172616	Colon_ALL	ILMN_1789266	CCDC25
greenyellow	0.740299	2.72817e-09	0.452168	0.00141876	Colon_ALL	ILMN_1789338	SORBS3
greenyellow	0.734686	4.13373e-09	0.458974	0.00117473	Colon_ALL	ILMN_1789457	GNL1
brown	0.664873	3.4473e-07	0.507682	0.000269963	Colon_ALL	ILMN_1789508	GTF3C3
yellow	0.778682	1.16365e-10	0.411881	0.00402027	Colon_ALL	ILMN_1789596	ETV6
yellow	0.554095	5.32914e-05	0.414449	0.00377591	Colon_ALL	ILMN_1789999	SLC30A7
brown	0.497487	0.000374057	0.419676	0.00331847	Colon_ALL	ILMN_1790008	CYP2U1
brown	0.709014	2.44034e-08	0.447683	0.00160329	Colon_ALL	ILMN_1790197	VSIG10
greenyellow	0.585782	1.52088e-05	0.418298	0.00343406	Colon_ALL	ILMN_1790202	C1orf35
green	0.812089	4.28175e-12	0.566857	3.26621e-05	Colon_ALL	ILMN_1790603	ATPAF1
brown	0.677134	1.7286e-07	0.491883	0.000445581	Colon_ALL	ILMN_1790650	FOPNL
purple	0.697983	4.94352e-08	0.45807	0.00120481	Colon_ALL	ILMN_1790741	RNF126
brown	0.642648	1.11444e-06	0.406665	0.00455956	Colon_ALL	ILMN_1790918	ZNF236
blue	0.558951	4.43387e-05	0.40709	0.00451344	Colon_ALL	ILMN_1790973	CDS2
blue	0.409628	0.00424594	0.503194	0.000312032	Colon_ALL	ILMN_1791447	CXCL12
brown	0.815227	3.03659e-12	0.553884	5.37164e-05	Colon_ALL	ILMN_1792508	TMEM59
purple	0.848299	5.1934e-14	0.458153	0.00120203	Colon_ALL	ILMN_1792679	ITGA5
brown	0.653874	6.23549e-07	0.691079	7.56914e-08	Colon_ALL	ILMN_1792689	HIST1H2AC
salmon	0.773337	1.87247e-10	0.587972	1.38777e-05	Colon_ALL	ILMN_1792885	CTSC
greenyellow	0.627184	2.38896e-06	0.430543	0.00252052	Colon_ALL	ILMN_1792910	MNT
brown	0.665222	3.38174e-07	0.525056	0.000151162	Colon_ALL	ILMN_1793549	PTPN4
green	0.693675	6.45751e-08	0.572512	2.61213e-05	Colon_ALL	ILMN_1793598	APIP
brown	0.690121	8.0229e-08	0.473727	0.000769809	Colon_ALL	ILMN_1794399	SNRK
greenyellow	0.697852	4.9842e-08	0.439261	0.00200824	Colon_ALL	ILMN_1794632	POLR1B
tan	0.510345	0.000247503	0.420499	0.00325106	Colon_ALL	ILMN_1794740	CD151
blue	0.491425	0.000451935	0.405031	0.0047411	Colon_ALL	ILMN_1794782	ABCG1
blue	0.773742	1.80704e-10	0.425597	0.00285984	Colon_ALL	ILMN_1794823	ZNF626
brown	0.750522	1.24492e-09	0.469574	0.000868718	Colon_ALL	ILMN_1795007	MAIP1
turquoise	0.461087	0.00110699	0.626856	2.42684e-06	Colon_ALL	ILMN_1795170	SLITRK2
purple	0.422719	0.00307526	0.425743	0.00284929	Colon_ALL	ILMN_1795270	MYCL
brown	0.453636	0.0013626	0.463815	0.00102471	Colon_ALL	ILMN_1795275	USP53
brown	0.636736	1.49906e-06	0.462221	0.00107212	Colon_ALL	ILMN_1795442	LAMA4
black	0.664482	3.52208e-07	0.429932	0.00256045	Colon_ALL	ILMN_1795679	STMN2
brown	0.668949	2.75026e-07	0.522669	0.000164004	Colon_ALL	ILMN_1795838	C4orf19
green	0.493963	0.000417702	0.631188	1.96876e-06	Colon_ALL	ILMN_1795839	SCCPDH
blue	0.519148	0.000184764	0.767227	3.17554e-10	Colon_ALL	ILMN_1796089	NKX2-3
greenyellow	0.462868	0.00105264	0.443088	0.00181418	Colon_ALL	ILMN_1796210	PPRC1
brown	0.69276	6.83091e-08	0.480797	0.000624407	Colon_ALL	ILMN_1796458	GABARAPL2
brown	0.610857	5.11506e-06	0.446513	0.0016548	Colon_ALL	ILMN_1797172	ERCC1
brown	0.830249	5.33179e-13	0.48722	0.000514246	Colon_ALL	ILMN_1797576	PLEKHA3
black	0.534217	0.000109913	0.428193	0.00267702	Colon_ALL	ILMN_1797728	HMGCS1
blue	0.538684	9.37806e-05	0.426087	0.00282448	Colon_ALL	ILMN_1797892	SCN11A
brown	0.583388	1.67971e-05	0.489778	0.000475479	Colon_ALL	ILMN_1797895	FFAR2
brown	0.752496	1.06533e-09	0.502106	0.000323086	Colon_ALL	ILMN_1797974	AIG1
brown	0.713721	1.78778e-08	0.447992	0.00158991	Colon_ALL	ILMN_1798108	ARMT1
brown	0.563736	3.68852e-05	0.5061	0.000284166	Colon_ALL	ILMN_1798360	ACKR3
greenyellow	0.64817	8.40058e-07	0.579858	1.94189e-05	Colon_ALL	ILMN_1798496	HOXB8
brown	0.73118	5.33049e-09	0.426001	0.00283067	Colon_ALL	ILMN_1798588	HLTF
brown	0.517269	0.000196788	0.755999	8.0507e-10	Colon_ALL	ILMN_1798663	MAB21L2
brown	0.826013	8.85482e-13	0.416835	0.00356068	Colon_ALL	ILMN_1798705	CCNC
brown	0.716506	1.48283e-08	0.492594	0.000435863	Colon_ALL	ILMN_1798728	URI1
greenyellow	0.576145	2.25784e-05	0.492284	0.000440072	Colon_ALL	ILMN_1798826	MRPS25
turquoise	0.60641	6.24771e-06	0.465043	0.00098951	Colon_ALL	ILMN_1798841	PLCXD3
yellow	0.607009	6.08258e-06	0.421061	0.00320574	Colon_ALL	ILMN_1799067	PRSS58
brown	0.784942	6.5547e-11	0.409456	0.00426364	Colon_ALL	ILMN_1799139	PLOD2
brown	0.64825	8.36587e-07	0.467586	0.000919985	Colon_ALL	ILMN_1799299	PRPF38B
brown	0.762511	4.72269e-10	0.42692	0.00276537	Colon_ALL	ILMN_1799604	OCIAD1
green	0.759901	5.85999e-10	0.428971	0.00262428	Colon_ALL	ILMN_1800225	PPARG
green	0.517805	0.000193291	0.508386	0.000263851	Colon_ALL	ILMN_1800420	RNF214
brown	0.697549	5.07946e-08	0.489985	0.000472457	Colon_ALL	ILMN_1800447	PHKB
brown	0.761167	5.27964e-10	0.520231	0.000178137	Colon_ALL	ILMN_1800612	VBP1
brown	0.718895	1.26078e-08	0.492444	0.000437896	Colon_ALL	ILMN_1800787	RFTN1
green	0.754265	9.25298e-10	0.565646	3.42455e-05	Colon_ALL	ILMN_1800912	ZNF106
turquoise	0.531332	0.000121634	0.403673	0.00489675	Colon_ALL	ILMN_1801090	KRT222
greenyellow	0.769707	2.56769e-10	0.530566	0.000124933	Colon_ALL	ILMN_1801421	EMD
brown	0.747202	1.61277e-09	0.69971	4.43547e-08	Colon_ALL	ILMN_1801767	ABHD3
brown	0.609242	5.5024e-06	0.415311	0.00369686	Colon_ALL	ILMN_1801833	ARHGAP24
brown	0.707934	2.61863e-08	0.462779	0.00105529	Colon_ALL	ILMN_1801864	NTAN1
purple	0.772646	1.98935e-10	0.440098	0.00196431	Colon_ALL	ILMN_1801913	PPIH
blue	0.761067	5.32341e-10	0.483883	0.000569073	Colon_ALL	ILMN_1802257	PCTP
brown	0.573092	2.55235e-05	0.563572	3.71212e-05	Colon_ALL	ILMN_1802338	HHLA3
brown	0.751027	1.19643e-09	0.529463	0.000129823	Colon_ALL	ILMN_1802377	IQCG
salmon	0.854619	2.13772e-14	0.443966	0.0017721	Colon_ALL	ILMN_1802780	CD163L1
brown	0.698587	4.75975e-08	0.437884	0.00208245	Colon_ALL	ILMN_1803005	MMACHC
brown	0.766245	3.4517e-10	0.44331	0.00180347	Colon_ALL	ILMN_1803033	MGST1
blue	0.654881	5.91221e-07	0.403901	0.0048703	Colon_ALL	ILMN_1803312	DIMT1
green	0.727082	7.14037e-09	0.402703	0.00501052	Colon_ALL	ILMN_1803423	ARHGEF6
brown	0.407269	0.004494	0.459064	0.00117178	Colon_ALL	ILMN_1803811	TRIB1
green	0.509273	0.00025633	0.432946	0.00236893	Colon_ALL	ILMN_1803818	NMNAT2
green	0.847201	6.03492e-14	0.530239	0.000126365	Colon_ALL	ILMN_1804150	HIBADH
purple	0.668212	2.86562e-07	0.463352	0.0010383	Colon_ALL	ILMN_1804248	FDPS
brown	0.665066	3.41086e-07	0.577483	2.13895e-05	Colon_ALL	ILMN_1804255	ADRB1
turquoise	0.455529	0.00129311	0.426649	0.00278443	Colon_ALL	ILMN_1804328	WWP1
brown	0.771591	2.18113e-10	0.407935	0.00442276	Colon_ALL	ILMN_1804676	VAMP4
blue	0.656399	5.45382e-07	0.511801	0.00023595	Colon_ALL	ILMN_1804884	C22orf39
brown	0.594583	1.04835e-05	0.443741	0.00178277	Colon_ALL	ILMN_1805147	ACSM5
brown	0.719822	1.18336e-08	0.453928	0.00135165	Colon_ALL	ILMN_1805251	CDC14C
purple	0.624144	2.76186e-06	0.466275	0.000955263	Colon_ALL	ILMN_1805636	PGAP3
brown	0.851549	3.30715e-14	0.432797	0.00237809	Colon_ALL	ILMN_1805652	PPP2R2D
brown	0.448143	0.00158341	0.445319	0.00170888	Colon_ALL	ILMN_1805930	CSF1
purple	0.611054	5.06941e-06	0.657775	5.06733e-07	Colon_ALL	ILMN_1805999	MYO1D
purple	0.499242	0.000353888	0.514443	0.000216223	Colon_ALL	ILMN_1806030	PPL
brown	0.883159	2.13871e-16	0.623492	2.84852e-06	Colon_ALL	ILMN_1806312	TMEM230
purple	0.540528	8.77754e-05	0.445889	0.0016829	Colon_ALL	ILMN_1806403	RASL12
greenyellow	0.752488	1.06597e-09	0.556232	4.91658e-05	Colon_ALL	ILMN_1806432	NT5C
brown	0.468197	0.000903944	0.413507	0.00386394	Colon_ALL	ILMN_1806631	TMEM203
turquoise	0.800387	1.46064e-11	0.407061	0.00451657	Colon_ALL	ILMN_1806787	CSDC2
brown	0.527763	0.000137705	0.444517	0.00174608	Colon_ALL	ILMN_1807169	TINAGL1
brown	0.725754	7.84086e-09	0.444905	0.001728	Colon_ALL	ILMN_1807304	MBNL1
green	0.47967	0.000645785	0.514167	0.000218212	Colon_ALL	ILMN_1807540	MICU1
green	0.857175	1.47532e-14	0.584522	1.60267e-05	Colon_ALL	ILMN_1807633	RIDA
turquoise	0.806886	7.46508e-12	0.45606	0.00127421	Colon_ALL	ILMN_1808245	SBSPON
brown	0.681309	1.35635e-07	0.585832	1.51771e-05	Colon_ALL	ILMN_1808305	RTCA
brown	0.578821	2.02578e-05	0.445502	0.00170052	Colon_ALL	ILMN_1808417	NPHP4
green	0.574675	2.39554e-05	0.423168	0.00304074	Colon_ALL	ILMN_1808501	SH3KBP1
blue	0.510019	0.000250153	0.514215	0.000217861	Colon_ALL	ILMN_1808568	PYCR2
blue	0.626062	2.52075e-06	0.425802	0.00284498	Colon_ALL	ILMN_1808613	CRELD1
brown	0.788718	4.5935e-11	0.535151	0.000106345	Colon_ALL	ILMN_1808634	DRAM2
brown	0.515096	0.000211581	0.440483	0.00194439	Colon_ALL	ILMN_1808731	LBX2
brown	0.706845	2.81077e-08	0.512873	0.000227753	Colon_ALL	ILMN_1808938	PIGF
brown	0.472652	0.000794399	0.492671	0.000434832	Colon_ALL	ILMN_1809347	SRP14
greenyellow	0.868951	2.42205e-15	0.559871	4.28066e-05	Colon_ALL	ILMN_1809866	WDR74
blue	0.580488	1.89247e-05	0.457006	0.00124111	Colon_ALL	ILMN_1809889	CCDC117
brown	0.652885	6.56926e-07	0.471264	0.000827173	Colon_ALL	ILMN_1810053	SLC16A7
green	0.631926	1.89924e-06	0.524916	0.000151886	Colon_ALL	ILMN_1810055	FAM234A
blue	0.785364	6.30142e-11	0.541269	8.54628e-05	Colon_ALL	ILMN_1810235	ATP6V1E2
brown	0.73238	4.88827e-09	0.522698	0.00016384	Colon_ALL	ILMN_1810785	RNF11
brown	0.63165	1.92497e-06	0.453543	0.00136609	Colon_ALL	ILMN_1810797	WASF3
brown	0.422015	0.00313007	0.422763	0.00307183	Colon_ALL	ILMN_1810941	COMT
turquoise	0.646685	9.0692e-07	0.405964	0.00463668	Colon_ALL	ILMN_1810942	CYP3A5
brown	0.730172	5.73048e-09	0.575018	2.3627e-05	Colon_ALL	ILMN_1810996	COL24A1
greenyellow	0.742683	2.27961e-09	0.419232	0.00335533	Colon_ALL	ILMN_1811102	LRSAM1
salmon	0.733991	4.3486e-09	0.408036	0.00441204	Colon_ALL	ILMN_1811171	GPR132
brown	0.72911	6.18247e-09	0.41499	0.00372611	Colon_ALL	ILMN_1811345	GLYAT
black	0.841736	1.25229e-13	0.479359	0.000651805	Colon_ALL	ILMN_1811468	IRX3
salmon	0.720112	1.1601e-08	0.524151	0.000155915	Colon_ALL	ILMN_1811890	RGS10
purple	0.433962	0.00230728	0.477106	0.000696914	Colon_ALL	ILMN_1811921	CSRP1
green	0.618195	3.6522e-06	0.444848	0.00173065	Colon_ALL	ILMN_1811933	SHMT1
brown	0.691342	7.4488e-08	0.621101	3.1885e-06	Colon_ALL	ILMN_1812926	ANTXR2
brown	0.782819	7.97975e-11	0.405188	0.00472343	Colon_ALL	ILMN_1813120	MAP4K3
blue	0.577616	2.12744e-05	0.602264	7.50853e-06	Colon_ALL	ILMN_1813295	LMO3
blue	0.502661	0.000317401	0.455453	0.00129584	Colon_ALL	ILMN_1813314
black	0.762201	4.84612e-10	0.549721	6.27412e-05	Colon_ALL	ILMN_1813341	PTGFR
green	0.814615	3.24896e-12	0.504496	0.000299252	Colon_ALL	ILMN_1813544	OXCT1
brown	0.571799	2.68737e-05	0.420514	0.00324985	Colon_ALL	ILMN_1813607	ANKRD30A
turquoise	0.617649	3.74605e-06	0.520474	0.000176678	Colon_ALL	ILMN_1813753	PTN
blue	0.438817	0.00203192	0.442823	0.00182704	Colon_ALL	ILMN_1813893	DDX43
brown	0.710275	2.24644e-08	0.41599	0.0036356	Colon_ALL	ILMN_1813955	SERTAD3
green	0.875517	8.18644e-16	0.414926	0.00373199	Colon_ALL	ILMN_1814120	PECR
brown	0.569144	2.98551e-05	0.462246	0.00107134	Colon_ALL	ILMN_1814327	AGTR1
blue	0.76947	2.62077e-10	0.421821	0.00314533	Colon_ALL	ILMN_1814808	BFAR
greenyellow	0.640256	1.25742e-06	0.460069	0.00113917	Colon_ALL	ILMN_1814971	MC1R
purple	0.665932	3.25178e-07	0.454772	0.00132052	Colon_ALL	ILMN_1819608	ARRB1
blue	0.562483	3.87165e-05	0.654134	6.15043e-07	Colon_ALL	ILMN_1844919	EBF2
green	0.790934	3.71602e-11	0.422318	0.00310641	Colon_ALL	ILMN_1847494	SLC16A7
tan	0.642119	1.14472e-06	0.469679	0.000866088	Colon_ALL	ILMN_1851865	SPAAR
brown	0.735939	3.7709e-09	0.417336	0.00351686	Colon_ALL	ILMN_1853876	TMEM64
brown	0.661632	4.11547e-07	0.433463	0.00233741	Colon_ALL	ILMN_1857915	SMIM30
black	0.685957	1.03055e-07	0.646177	9.3089e-07	Colon_ALL	ILMN_1864685	SLIT3
brown	0.838706	1.85528e-13	0.483077	0.000583076	Colon_ALL	ILMN_1869897	NEK7
brown	0.824296	1.08349e-12	0.421738	0.00315191	Colon_ALL	ILMN_1875342	LNPEP
brown	0.581312	1.82966e-05	0.509812	0.000251854	Colon_ALL	ILMN_1881960	HDAC9
brown	0.562157	3.92076e-05	0.582445	1.74634e-05	Colon_ALL	ILMN_1886422	FGF7
black	0.86683	3.39599e-15	0.476579	0.000707847	Colon_ALL	ILMN_1904578	TENM1
brown	0.639923	1.27867e-06	0.422827	0.00306693	Colon_ALL	ILMN_1910180	NRP2
brown	0.697654	5.04622e-08	0.591017	1.22051e-05	Colon_ALL	ILMN_1910893	ASXL2
green	0.63387	1.72685e-06	0.402567	0.00502667	Colon_ALL	ILMN_1912737	HIPK2
green	0.733612	4.4705e-09	0.401698	0.00513098	Colon_ALL	ILMN_2043265	ZNF106
brown	0.603255	7.18741e-06	0.505459	0.000290115	Colon_ALL	ILMN_2044085	CNOT9
blue	0.421092	0.0032033	0.458029	0.00120619	Colon_ALL	ILMN_2049274	ARHGDIG
brown	0.634934	1.63882e-06	0.400162	0.00531994	Colon_ALL	ILMN_2052598	ARMC10
brown	0.598306	8.92696e-06	0.485398	0.000543565	Colon_ALL	ILMN_2053281	L3HYPDH
brown	0.453581	0.00136467	0.616006	4.04187e-06	Colon_ALL	ILMN_2056087	IGF1
black	0.649224	7.954e-07	0.459093	0.00117083	Colon_ALL	ILMN_2057479	EGFL6
greenyellow	0.761683	5.05881e-10	0.511217	0.000240518	Colon_ALL	ILMN_2057981	ZC2HC1A
brown	0.758381	6.63624e-10	0.616746	3.90603e-06	Colon_ALL	ILMN_2059294	RTCA
brown	0.607487	5.95402e-06	0.63903	1.33713e-06	Colon_ALL	ILMN_2059689	TMEM54
brown	0.547058	6.92203e-05	0.52861	0.000133725	Colon_ALL	ILMN_2064694	STIM1
yellow	0.518912	0.000186237	0.54115	8.5829e-05	Colon_ALL	ILMN_2067656	CCND2
brown	0.679856	1.47643e-07	0.484307	0.000561831	Colon_ALL	ILMN_2067708	TFB2M
purple	0.674112	2.05538e-07	0.466973	0.000936333	Colon_ALL	ILMN_2075818	ZNF598
brown	0.640811	1.22282e-06	0.516041	0.000205028	Colon_ALL	ILMN_2075892	LRP5
greenyellow	0.694266	6.2271e-08	0.474427	0.000754168	Colon_ALL	ILMN_2077094	TM7SF2
brown	0.698643	4.74319e-08	0.444105	0.00176548	Colon_ALL	ILMN_2081398	KIF3B
black	0.497407	0.000375002	0.40975	0.00423338	Colon_ALL	ILMN_2081883	IQCK
purple	0.817851	2.26688e-12	0.606479	6.22851e-06	Colon_ALL	ILMN_2082130	CZIB
brown	0.659525	4.61262e-07	0.470558	0.000844301	Colon_ALL	ILMN_2086238	SMYD4
brown	0.790148	4.0072e-11	0.543904	7.76803e-05	Colon_ALL	ILMN_2086890	ANGPT1
turquoise	0.537111	9.91978e-05	0.48441	0.000560072	Colon_ALL	ILMN_2087080	RPL5
turquoise	0.692316	7.01903e-08	0.487502	0.000509836	Colon_ALL	ILMN_2087646
blue	0.708886	2.4609e-08	0.435904	0.00219339	Colon_ALL	ILMN_2089329	SPRY2
turquoise	0.498306	0.000364517	0.409606	0.00424814	Colon_ALL	ILMN_2089752	ALKAL2
greenyellow	0.733577	4.48174e-09	0.469823	0.000862489	Colon_ALL	ILMN_2094313	ZDHHC1
red	0.817784	2.28419e-12	0.405483	0.00469024	Colon_ALL	ILMN_2098743	ACOT13
yellow	0.594361	1.0584e-05	0.487929	0.000503225	Colon_ALL	ILMN_2101885	TUBB
brown	0.509106	0.000257732	0.41009	0.00419872	Colon_ALL	ILMN_2101930	POLG
green	0.59581	9.94495e-06	0.498744	0.000359506	Colon_ALL	ILMN_2104924	FAM207A
brown	0.595389	1.01267e-05	0.467633	0.000918753	Colon_ALL	ILMN_2109197	EPB41L3
greenyellow	0.58474	1.58819e-05	0.501853	0.00032571	Colon_ALL	ILMN_2110167	POLR1E
greenyellow	0.615434	4.1498e-06	0.468045	0.000907908	Colon_ALL	ILMN_2110252	NPM3
brown	0.700258	4.28483e-08	0.475793	0.000724466	Colon_ALL	ILMN_2112417	PGAM1
blue	0.591014	1.22068e-05	0.545905	7.22095e-05	Colon_ALL	ILMN_2112638	SVEP1
blue	0.611888	4.88097e-06	0.400089	0.00532897	Colon_ALL	ILMN_2116127	NPEPPS
brown	0.603006	7.26686e-06	0.782948	7.88555e-11	Colon_ALL	ILMN_2116877	OLFM4
blue	0.530183	0.00012661	0.507644	0.000270301	Colon_ALL	ILMN_2117987	TFDP1
brown	0.547953	6.69762e-05	0.427148	0.00274936	Colon_ALL	ILMN_2119937	NDUFB3
brown	0.53092	0.0001234	0.482978	0.000584818	Colon_ALL	ILMN_2119945	NDUFB3
blue	0.782993	7.85272e-11	0.40638	0.00459083	Colon_ALL	ILMN_2123402	CNPY2
black	0.590615	1.24147e-05	0.435209	0.0022336	Colon_ALL	ILMN_2126038	STMN2
green	0.68164	1.33025e-07	0.436248	0.00217374	Colon_ALL	ILMN_2128293	APIP
brown	0.729438	6.03969e-09	0.435224	0.0022327	Colon_ALL	ILMN_2129015	AFF1
pink	0.482473	0.000593779	0.412011	0.00400755	Colon_ALL	ILMN_2129505	CYB561A3
brown	0.696281	5.49695e-08	0.417093	0.00353799	Colon_ALL	ILMN_2131880	DPY30
greenyellow	0.70215	3.80055e-08	0.494542	0.000410236	Colon_ALL	ILMN_2135798	NR2C2AP
greenyellow	0.494238	0.000414146	0.416743	0.00356873	Colon_ALL	ILMN_2136010	ADH4
turquoise	0.482961	0.000585124	0.4279	0.00269712	Colon_ALL	ILMN_2136147	BCAS1
green	0.726386	7.49958e-09	0.437985	0.00207691	Colon_ALL	ILMN_2139761	LIMCH1
black	0.881107	3.09451e-16	0.496409	0.000386954	Colon_ALL	ILMN_2140559	IRX5
greenyellow	0.810136	5.28582e-12	0.491549	0.000450209	Colon_ALL	ILMN_2142554	NENF
blue	0.421043	0.00320717	0.428816	0.00263473	Colon_ALL	ILMN_2145501	ANGPTL1
blue	0.731176	5.33216e-09	0.522086	0.000167289	Colon_ALL	ILMN_2148913	TMEM45A
blue	0.62446	2.72066e-06	0.521073	0.000173135	Colon_ALL	ILMN_2149164	SFRP1
brown	0.836852	2.35054e-13	0.589819	1.28398e-05	Colon_ALL	ILMN_2150402	TMEM64
purple	0.545595	7.30336e-05	0.420619	0.00324136	Colon_ALL	ILMN_2150654	ZSWIM4
brown	0.745396	1.85356e-09	0.421922	0.00313737	Colon_ALL	ILMN_2151056	BORCS7
greenyellow	0.550108	6.18478e-05	0.435592	0.00221137	Colon_ALL	ILMN_2151075	ZNF821
turquoise	0.410028	0.00420506	0.473061	0.000784962	Colon_ALL	ILMN_2151114	VSNL1
brown	0.698274	4.8543e-08	0.650081	7.60765e-07	Colon_ALL	ILMN_2153373	LRBA
blue	0.4469	0.0016376	0.416635	0.00357828	Colon_ALL	ILMN_2155312	C1QTNF9B
blue	0.773035	1.92278e-10	0.652308	6.77129e-07	Colon_ALL	ILMN_2156936	SCCPDH
greenyellow	0.755945	8.08537e-10	0.532342	0.000117408	Colon_ALL	ILMN_2158003	IQCN
brown	0.717199	1.41491e-08	0.507506	0.000271511	Colon_ALL	ILMN_2158705	ACYP2
brown	0.662222	3.98539e-07	0.620418	3.29223e-06	Colon_ALL	ILMN_2158902	PXDNL
blue	0.768317	2.8933e-10	0.414045	0.00381345	Colon_ALL	ILMN_2160718	DNHD1
brown	0.79885	1.70594e-11	0.407423	0.0044775	Colon_ALL	ILMN_2166865	ENY2
salmon	0.805761	8.39959e-12	0.452952	0.00138852	Colon_ALL	ILMN_2169692	SCN9A
brown	0.601725	7.68854e-06	0.485099	0.000548519	Colon_ALL	ILMN_2170353	HACD2
brown	0.621063	3.19412e-06	0.637556	1.43921e-06	Colon_ALL	ILMN_2172318	TAFA2
green	0.642765	1.10785e-06	0.427777	0.0027056	Colon_ALL	ILMN_2173291	CYP4B1
brown	0.786303	5.77122e-11	0.561771	3.97943e-05	Colon_ALL	ILMN_2174369	ELOVL5
greenyellow	0.585272	1.55347e-05	0.499951	0.000346023	Colon_ALL	ILMN_2174394	MMS19
brown	0.52428	0.000155231	0.410539	0.00415336	Colon_ALL	ILMN_2178994	TUBB8
greenyellow	0.668671	2.79313e-07	0.527572	0.000138619	Colon_ALL	ILMN_2179717	FAM189A2
yellow	0.470731	0.000840094	0.47686	0.000701984	Colon_ALL	ILMN_2179726	CCDC189
blue	0.640591	1.23648e-06	0.517728	0.000193791	Colon_ALL	ILMN_2180848	COCH
blue	0.835212	2.89064e-13	0.424247	0.00295914	Colon_ALL	ILMN_2182148	CNRIP1
brown	0.558435	4.5221e-05	0.422421	0.00309839	Colon_ALL	ILMN_2187830	CCNH
brown	0.659438	4.63439e-07	0.455358	0.00129925	Colon_ALL	ILMN_2190684	CRYBG3
green	0.757686	7.02283e-10	0.455091	0.00130891	Colon_ALL	ILMN_2191428	UBB
brown	0.572116	2.65373e-05	0.424055	0.00297357	Colon_ALL	ILMN_2191929	ABITRAM
greenyellow	0.723824	8.97489e-09	0.482471	0.000593826	Colon_ALL	ILMN_2192683	DHX37
salmon	0.600521	8.10533e-06	0.448448	0.00157037	Colon_ALL	ILMN_2193817	CLEC4G
turquoise	0.66375	3.66637e-07	0.400806	0.00524002	Colon_ALL	ILMN_2195482	CACNB3
brown	0.590483	1.24847e-05	0.427425	0.00273003	Colon_ALL	ILMN_2196097	PPP2CA
red	0.606009	6.36045e-06	0.430041	0.00255329	Colon_ALL	ILMN_2198413	MYEOV
brown	0.618483	3.60352e-06	0.497176	0.00037774	Colon_ALL	ILMN_2198893
blue	0.467663	0.000917953	0.427109	0.00275206	Colon_ALL	ILMN_2199313	NPDC1
yellow	0.470647	0.000842128	0.534903	0.00010728	Colon_ALL	ILMN_2199768	SLITRK4
tan	0.818956	2.00161e-12	0.447659	0.00160435	Colon_ALL	ILMN_2201347	ZDHHC3
brown	0.519531	0.000182392	0.644559	1.01123e-06	Colon_ALL	ILMN_2201678	FSTL1
brown	0.63501	1.6327e-06	0.420831	0.00322425	Colon_ALL	ILMN_2206554	SLC35F5
brown	0.805042	9.05464e-12	0.513802	0.000220866	Colon_ALL	ILMN_2207328	TPGS2
tan	0.719226	1.23262e-08	0.413212	0.00389188	Colon_ALL	ILMN_2207504	LEP
brown	0.792119	3.31425e-11	0.441442	0.00189553	Colon_ALL	ILMN_2209180	RPRD1A
salmon	0.602001	7.59593e-06	0.454045	0.0013473	Colon_ALL	ILMN_2211739	SLC15A2
black	0.414485	0.0037726	0.481395	0.000613313	Colon_ALL	ILMN_2218002	LIPC
brown	0.473049	0.000785238	0.431888	0.00243463	Colon_ALL	ILMN_2219512	NPHP4
brown	0.692223	7.05901e-08	0.53931	9.17004e-05	Colon_ALL	ILMN_2220184	GFPT1
brown	0.684388	1.13131e-07	0.537278	9.86071e-05	Colon_ALL	ILMN_2220518	LAMTOR5
brown	0.702219	3.78388e-08	0.41722	0.00352694	Colon_ALL	ILMN_2221014	BAG4
brown	0.686195	1.01599e-07	0.517851	0.000192992	Colon_ALL	ILMN_2225595	ACAD8
brown	0.561807	3.97397e-05	0.409602	0.00424863	Colon_ALL	ILMN_2225698	NDUFA10
brown	0.707279	2.73272e-08	0.421981	0.00313274	Colon_ALL	ILMN_2226955	VOPP1
blue	0.741048	2.57912e-09	0.430586	0.00251774	Colon_ALL	ILMN_2228873	STARD3NL
brown	0.60693	6.1042e-06	0.418276	0.00343593	Colon_ALL	ILMN_2228938	ECM2
green	0.784185	7.03292e-11	0.400724	0.00525003	Colon_ALL	ILMN_2231911	AUH
brown	0.739089	2.98657e-09	0.52946	0.000129841	Colon_ALL	ILMN_2232166	CCDC90B
purple	0.717485	1.38772e-08	0.441921	0.00187151	Colon_ALL	ILMN_2232177	ACTN1
purple	0.846993	6.2079e-14	0.465917	0.000965107	Colon_ALL	ILMN_2233099	SSRP1
brown	0.627711	2.32923e-06	0.418994	0.00337523	Colon_ALL	ILMN_2234873	NME2
blue	0.694509	6.1343e-08	0.504387	0.000300306	Colon_ALL	ILMN_2234956	LEPR
brown	0.523477	0.00015955	0.404981	0.00474677	Colon_ALL	ILMN_2235354	PWWP2B
brown	0.724307	8.67729e-09	0.548998	6.44425e-05	Colon_ALL	ILMN_2239772	ABHD17A
brown	0.604212	6.88953e-06	0.431746	0.00244361	Colon_ALL	ILMN_2240597	TCEA2
salmon	0.859615	1.02829e-14	0.508013	0.000267071	Colon_ALL	ILMN_2242463	CTSC
brown	0.642539	1.12065e-06	0.448966	0.00154842	Colon_ALL	ILMN_2244841	ALDH4A1
brown	0.578716	2.03442e-05	0.519554	0.000182251	Colon_ALL	ILMN_2252136	YWHAE
blue	0.739541	2.88745e-09	0.436362	0.00216727	Colon_ALL	ILMN_2253732	ST8SIA4
brown	0.635831	1.56781e-06	0.455219	0.00130429	Colon_ALL	ILMN_2267535	NET1
brown	0.492482	0.000437377	0.500766	0.000337188	Colon_ALL	ILMN_2274531	ZNF586
purple	0.816145	2.74289e-12	0.418691	0.00340074	Colon_ALL	ILMN_2277676	ERCC1
brown	0.624656	2.69541e-06	0.550703	6.04953e-05	Colon_ALL	ILMN_2278335	AKR1B15
green	0.833788	3.45257e-13	0.516277	0.000203426	Colon_ALL	ILMN_2282352	PHYH
brown	0.555318	5.08936e-05	0.43664	0.00215157	Colon_ALL	ILMN_2282366	IQSEC3
green	0.777708	1.27025e-10	0.538575	9.41473e-05	Colon_ALL	ILMN_2285817	FAM89A
brown	0.735815	3.80527e-09	0.530018	0.000127344	Colon_ALL	ILMN_2290998	CCS
brown	0.702565	3.70144e-08	0.439316	0.00200535	Colon_ALL	ILMN_2292123	CERT1
blue	0.462681	0.00105823	0.438453	0.00205149	Colon_ALL	ILMN_2294123	SEPTIN4
turquoise	0.474595	0.000750445	0.471996	0.000809747	Colon_ALL	ILMN_2297626	PEG10
brown	0.801899	1.25225e-11	0.506551	0.000280054	Colon_ALL	ILMN_2302118	CCDC50
black	0.467824	0.000913702	0.450552	0.00148296	Colon_ALL	ILMN_2303166	MBNL3
red	0.519935	0.000179925	0.414618	0.0037603	Colon_ALL	ILMN_2304186	MITF
tan	0.634898	1.64172e-06	0.494438	0.000411564	Colon_ALL	ILMN_2304495	PPP1R1B
green	0.544469	7.6097e-05	0.477322	0.000692456	Colon_ALL	ILMN_2304512	SAA1
brown	0.627275	2.37847e-06	0.402697	0.00501133	Colon_ALL	ILMN_2307978	ABHD17A
yellow	0.589411	1.30627e-05	0.510144	0.000249134	Colon_ALL	ILMN_2309848	FXYD5
greenyellow	0.670656	2.49938e-07	0.469723	0.000864993	Colon_ALL	ILMN_2310589
tan	0.810337	5.17294e-12	0.413897	0.00382724	Colon_ALL	ILMN_2311674	ADCY6
purple	0.551135	5.95316e-05	0.407383	0.00448177	Colon_ALL	ILMN_2312386	PAIP1
greenyellow	0.819689	1.842e-12	0.558802	4.45918e-05	Colon_ALL	ILMN_2312709	LCMT1
black	0.506993	0.00027607	0.454376	0.00133507	Colon_ALL	ILMN_2312719	EXOSC9
yellow	0.510384	0.00024718	0.437163	0.0021223	Colon_ALL	ILMN_2315694	STRADA
turquoise	0.626652	2.45066e-06	0.470496	0.00084582	Colon_ALL	ILMN_2315789	PTPRD
turquoise	0.720577	1.12362e-08	0.411943	0.00401414	Colon_ALL	ILMN_2317751	REC8
turquoise	0.525363	0.000149577	0.46806	0.000907536	Colon_ALL	ILMN_2318568	HCFC1R1
brown	0.508096	0.000266352	0.539369	9.15063e-05	Colon_ALL	ILMN_2320164	P2RY12
yellow	0.47641	0.000711385	0.505925	0.000285778	Colon_ALL	ILMN_2320250	NOL6
yellow	0.650359	7.49801e-07	0.514024	0.000219244	Colon_ALL	ILMN_2321416	DIAPH1
turquoise	0.483841	0.000569801	0.565382	3.45998e-05	Colon_ALL	ILMN_2322996	EYA2
brown	0.708875	2.46268e-08	0.561173	4.07206e-05	Colon_ALL	ILMN_2324672	USF2
turquoise	0.67405	2.06259e-07	0.409916	0.00421649	Colon_ALL	ILMN_2325347	B3GALNT1
green	0.790004	4.06311e-11	0.462686	0.00105809	Colon_ALL	ILMN_2325534	KCNIP2
brown	0.703734	3.43495e-08	0.422832	0.00306654	Colon_ALL	ILMN_2325574	CASC4
green	0.789934	4.09017e-11	0.508454	0.000263269	Colon_ALL	ILMN_2326262	SORBS1
tan	0.65135	7.11985e-07	0.474927	0.000743161	Colon_ALL	ILMN_2326591	ANXA6
yellow	0.479194	0.00065501	0.503689	0.000307116	Colon_ALL	ILMN_2328363	CMTM1
brown	0.454395	0.00133437	0.493964	0.000417697	Colon_ALL	ILMN_2329679	TPST2
blue	0.435042	0.00224336	0.481917	0.000603794	Colon_ALL	ILMN_2329927	ABCG1
brown	0.566223	3.34825e-05	0.495323	0.000400348	Colon_ALL	ILMN_2330570	LEPR
brown	0.596161	9.79567e-06	0.484564	0.000557477	Colon_ALL	ILMN_2333594	SUMO2
salmon	0.808039	6.60979e-12	0.471406	0.000823769	Colon_ALL	ILMN_2333670	RNASE1
blue	0.55571	5.01451e-05	0.430327	0.00253457	Colon_ALL	ILMN_2334359	GFRA1
brown	0.771486	2.20113e-10	0.412694	0.00394141	Colon_ALL	ILMN_2334760	ARMCX3
turquoise	0.424305	0.00295484	0.424549	0.0029367	Colon_ALL	ILMN_2335604	SKAP1
salmon	0.704833	3.20106e-08	0.417304	0.00351962	Colon_ALL	ILMN_2335704	NCF4
purple	0.594785	1.03929e-05	0.429909	0.00256191	Colon_ALL	ILMN_2337655	WARS
brown	0.805927	8.2558e-12	0.509698	0.000252795	Colon_ALL	ILMN_2337740	TULP4
yellow	0.488877	0.000488819	0.400235	0.00531084	Colon_ALL	ILMN_2338323	CDC25B
brown	0.691733	7.27364e-08	0.471128	0.00083045	Colon_ALL	ILMN_2338480	RHOT1
salmon	0.883115	2.1561e-16	0.421469	0.00317321	Colon_ALL	ILMN_2339294	LILRB5
brown	0.699772	4.4181e-08	0.532584	0.000116415	Colon_ALL	ILMN_2340565	ATP2C1
blue	0.623474	2.85096e-06	0.497456	0.000374415	Colon_ALL	ILMN_2341067	NLGN4X
brown	0.594845	1.03662e-05	0.456598	0.00125529	Colon_ALL	ILMN_2341343	AGTR1
brown	0.785345	6.31264e-11	0.44201	0.00186711	Colon_ALL	ILMN_2342084	BCAP29
brown	0.742879	2.24599e-09	0.66765	2.95657e-07	Colon_ALL	ILMN_2343278	PLPP1
purple	0.71756	1.38065e-08	0.420516	0.00324966	Colon_ALL	ILMN_2345837	CLTA
turquoise	0.567914	3.13358e-05	0.48969	0.00047676	Colon_ALL	ILMN_2347349	CCNB1IP1
brown	0.733059	4.65354e-09	0.520434	0.000176918	Colon_ALL	ILMN_2347380	ARHGEF11
brown	0.662705	3.88192e-07	0.503569	0.000308304	Colon_ALL	ILMN_2348093	ATP5PF
blue	0.845599	7.49641e-14	0.410479	0.00415938	Colon_ALL	ILMN_2349006	USP21
brown	0.725032	8.2483e-09	0.428809	0.00263519	Colon_ALL	ILMN_2350634	EFEMP1
brown	0.777245	1.32417e-10	0.46328	0.00104043	Colon_ALL	ILMN_2351241	RNF14
salmon	0.730238	5.70348e-09	0.40271	0.00500972	Colon_ALL	ILMN_2352380	TRPM2
brown	0.796381	2.18277e-11	0.425214	0.00288772	Colon_ALL	ILMN_2352921	BPGM
brown	0.821468	1.50344e-12	0.4006	0.00526548	Colon_ALL	ILMN_2353033	FUBP3
turquoise	0.466133	0.000959148	0.415607	0.00367006	Colon_ALL	ILMN_2353129	EYA2
turquoise	0.500824	0.000336563	0.422971	0.00305585	Colon_ALL	ILMN_2353862	DRC3
greenyellow	0.739563	2.88267e-09	0.445318	0.00170896	Colon_ALL	ILMN_2354855	OTUB1
blue	0.73691	3.51056e-09	0.448308	0.00157637	Colon_ALL	ILMN_2355033	DENND11
brown	0.659141	4.70899e-07	0.511917	0.000235048	Colon_ALL	ILMN_2355168	MGST1
turquoise	0.536072	0.000102929	0.565185	3.48657e-05	Colon_ALL	ILMN_2355486	FAM3B
yellow	0.577181	2.16528e-05	0.40525	0.00471637	Colon_ALL	ILMN_2357134	SPHK1
greenyellow	0.663501	3.71678e-07	0.450265	0.00149462	Colon_ALL	ILMN_2358202	SRRT
purple	0.779145	1.11607e-10	0.442363	0.00184964	Colon_ALL	ILMN_2358914	SLC35C2
blue	0.710776	2.17356e-08	0.427489	0.00272558	Colon_ALL	ILMN_2360184	INVS
brown	0.455061	0.00130998	0.429399	0.00259567	Colon_ALL	ILMN_2361991	TRIM15
blue	0.513841	0.000220577	0.406038	0.00462853	Colon_ALL	ILMN_2362847	PPARA
brown	0.565418	3.45517e-05	0.488411	0.000495846	Colon_ALL	ILMN_2363658	PXDN
purple	0.799873	1.53875e-11	0.432228	0.00241335	Colon_ALL	ILMN_2364357	RPS6KB2
purple	0.750329	1.26395e-09	0.426041	0.0028278	Colon_ALL	ILMN_2364521	AXL
brown	0.648923	8.07913e-07	0.404379	0.00481523	Colon_ALL	ILMN_2365686	ALG8
blue	0.404073	0.00485041	0.454726	0.00132221	Colon_ALL	ILMN_2366041	ITM2C
purple	0.710226	2.25378e-08	0.436272	0.0021724	Colon_ALL	ILMN_2366177	IFT122
blue	0.711666	2.04945e-08	0.430897	0.00249768	Colon_ALL	ILMN_2366714	UQCR10
blue	0.488292	0.000497662	0.467159	0.000931351	Colon_ALL	ILMN_2366998	CHTF8
greenyellow	0.757098	7.36601e-10	0.482189	0.000598883	Colon_ALL	ILMN_2368068	TCF20
brown	0.648742	8.15549e-07	0.436532	0.00215767	Colon_ALL	ILMN_2370622	F8
brown	0.662373	3.95275e-07	0.54884	6.48208e-05	Colon_ALL	ILMN_2371458	ACKR3
greenyellow	0.788666	4.61628e-11	0.4887	0.00049148	Colon_ALL	ILMN_2371700	TREX2
blue	0.513096	0.000226086	0.679832	1.47853e-07	Colon_ALL	ILMN_2371724	CEACAM1
turquoise	0.709783	2.32038e-08	0.446319	0.00166348	Colon_ALL	ILMN_2371911	MUC1
brown	0.773934	1.77665e-10	0.4368	0.00214257	Colon_ALL	ILMN_2372398	ALDH5A1
brown	0.695905	5.62664e-08	0.434146	0.00229628	Colon_ALL	ILMN_2372698	RGN
green	0.71454	1.69243e-08	0.402451	0.0050405	Colon_ALL	ILMN_2373566	PJA1
brown	0.564465	3.58559e-05	0.470285	0.000851019	Colon_ALL	ILMN_2373830	ATN1
greenyellow	0.776315	1.43882e-10	0.581908	1.78534e-05	Colon_ALL	ILMN_2373982	PICK1
green	0.644551	1.01166e-06	0.411333	0.00407419	Colon_ALL	ILMN_2375557	SCMH1
brown	0.772547	2.00667e-10	0.533206	0.000113898	Colon_ALL	ILMN_2376723	CDKN2B
brown	0.827485	7.43579e-13	0.544136	7.70261e-05	Colon_ALL	ILMN_2378100	FBXL5
brown	0.662139	4.00348e-07	0.436098	0.00218231	Colon_ALL	ILMN_2378257	SDF4
brown	0.693202	6.64827e-08	0.424891	0.00291139	Colon_ALL	ILMN_2379560	CDC14B
blue	0.710085	2.2747e-08	0.418694	0.00340046	Colon_ALL	ILMN_2380740	MTO1
brown	0.550583	6.07664e-05	0.432343	0.00240617	Colon_ALL	ILMN_2381397	HSPD1
turquoise	0.596267	9.75092e-06	0.448073	0.00158644	Colon_ALL	ILMN_2381476	ATL1
purple	0.771407	2.21628e-10	0.4491	0.00154281	Colon_ALL	ILMN_2381841	DDX19B
brown	0.597619	9.19735e-06	0.508478	0.000263067	Colon_ALL	ILMN_2381899	OPTN
brown	0.844246	8.98669e-14	0.50392	0.00030485	Colon_ALL	ILMN_2382121	OCRL
blue	0.805407	8.71673e-12	0.412889	0.00392272	Colon_ALL	ILMN_2382648	MID2
green	0.55401	5.34615e-05	0.600265	8.19653e-06	Colon_ALL	ILMN_2382829	PRDX2
brown	0.627526	2.35001e-06	0.432987	0.0023664	Colon_ALL	ILMN_2383435	PSMD10
brown	0.667085	3.05085e-07	0.617893	3.70378e-06	Colon_ALL	ILMN_2384241	TGFBR2
brown	0.776081	1.4691e-10	0.469748	0.000864366	Colon_ALL	ILMN_2384536	ECI2
blue	0.794267	2.68838e-11	0.413993	0.00381828	Colon_ALL	ILMN_2386355	CSNK2A1
tan	0.690164	8.00191e-08	0.452023	0.00142442	Colon_ALL	ILMN_2387214	PALM
brown	0.669027	2.73817e-07	0.503994	0.000304126	Colon_ALL	ILMN_2388090	MAPK14
brown	0.6251	2.63917e-06	0.485967	0.000534249	Colon_ALL	ILMN_2388800	PLPP3
brown	0.726393	7.4958e-09	0.427317	0.00273751	Colon_ALL	ILMN_2389151	UGP2
brown	0.44477	0.00173429	0.443817	0.00177916	Colon_ALL	ILMN_2389501	HSD11B1
brown	0.553641	5.42073e-05	0.509332	0.000255836	Colon_ALL	ILMN_2389506	HSD11B1
turquoise	0.522933	0.000162536	0.402227	0.00506727	Colon_ALL	ILMN_2390526	RARB
blue	0.502034	0.000323831	0.501188	0.00033269	Colon_ALL	ILMN_2391355	STAMBP
black	0.540018	8.93989e-05	0.559164	4.39807e-05	Colon_ALL	ILMN_2391400	PITX2
turquoise	0.470194	0.000853264	0.560742	4.1401e-05	Colon_ALL	ILMN_2392189	CTDSPL
greenyellow	0.667708	2.94718e-07	0.451322	0.00145202	Colon_ALL	ILMN_2392286	GMPPB
black	0.623203	2.88769e-06	0.578408	2.06008e-05	Colon_ALL	ILMN_2395652	PTGFR
brown	0.497361	0.000375537	0.511832	0.000235703	Colon_ALL	ILMN_2395856	TMEM218
greenyellow	0.614504	4.33102e-06	0.41091	0.00411623	Colon_ALL	ILMN_2395926	MANBAL
brown	0.820429	1.6932e-12	0.580243	1.91158e-05	Colon_ALL	ILMN_2395969	PRDX3
brown	0.819026	1.98584e-12	0.582938	1.71118e-05	Colon_ALL	ILMN_2395974	PRDX3
green	0.698488	4.78949e-08	0.420756	0.00323028	Colon_ALL	ILMN_2396410	CS
purple	0.767214	3.17892e-10	0.446499	0.00165543	Colon_ALL	ILMN_2396982	BCL2L12
brown	0.706381	2.89669e-08	0.410911	0.00411604	Colon_ALL	ILMN_2397230	USP16
brown	0.837398	2.19298e-13	0.447063	0.00163039	Colon_ALL	ILMN_2397231	USP16
purple	0.784424	6.87834e-11	0.489757	0.000475787	Colon_ALL	ILMN_2398432	BRMS1
brown	0.617216	3.82186e-06	0.52567	0.00014801	Colon_ALL	ILMN_2399016	MMP28
blue	0.503891	0.000305138	0.52854	0.00013405	Colon_ALL	ILMN_2399827	HSF4
tan	0.714699	1.67451e-08	0.43632	0.00216968	Colon_ALL	ILMN_2401618	MLX
brown	0.570318	2.85014e-05	0.461101	0.00110658	Colon_ALL	ILMN_2402463	SHMT1
blue	0.663335	3.7507e-07	0.423615	0.00300672	Colon_ALL	ILMN_2403965	TXNDC5
brown	0.924544	1.78182e-20	0.655249	5.7978e-07	Colon_ALL	ILMN_2404539	TMEM230
greenyellow	0.57742	2.14442e-05	0.425426	0.00287226	Colon_ALL	ILMN_2405233	FAM133B
blue	0.560408	4.19359e-05	0.487413	0.000511213	Colon_ALL	ILMN_2405797	REPS2
brown	0.869432	2.24143e-15	0.633855	1.72812e-06	Colon_ALL	ILMN_2406304	PDZRN3
brown	0.796007	2.26498e-11	0.55212	5.73839e-05	Colon_ALL	ILMN_2406468	NFU1
blue	0.505566	0.00028911	0.412826	0.00392875	Colon_ALL	ILMN_2406557	ALDH4A1
green	0.811206	4.71109e-12	0.410678	0.00413941	Colon_ALL	ILMN_2406892	URI1
yellow	0.536244	0.000102303	0.494447	0.000411446	Colon_ALL	ILMN_2408576	NIBAN2
brown	0.645944	9.42098e-07	0.590487	1.24823e-05	Colon_ALL	ILMN_2408683	PLPP3
blue	0.913937	3.06874e-19	0.412236	0.00398564	Colon_ALL	ILMN_2409318	RCCD1
brown	0.880804	3.26634e-16	0.444442	0.00174964	Colon_ALL	ILMN_2409395	CCNC
brown	0.456355	0.0012638	0.445439	0.00170338	Colon_ALL	ILMN_2410929	PAPSS2
black	0.898603	1.04104e-17	0.51609	0.000204699	Colon_ALL	ILMN_2411236	NRCAM
yellow	0.540488	8.79013e-05	0.538572	9.41574e-05	Colon_ALL	ILMN_2411282	QSOX1
turquoise	0.76836	2.88266e-10	0.421427	0.00317653	Colon_ALL	ILMN_2413158	PODXL
brown	0.554487	5.25114e-05	0.508258	0.000264952	Colon_ALL	ILMN_2414268	COLEC11
brown	0.783507	7.48871e-11	0.567521	3.18238e-05	Colon_ALL	ILMN_2414878	STXBP1
yellow	0.53391	0.000111108	0.483727	0.00057176	Colon_ALL	ILMN_2415189	ATP1A1
purple	0.641026	1.20965e-06	0.470117	0.000855182	Colon_ALL	ILMN_2415235	CSNK1E
brown	0.562819	3.82182e-05	0.456593	0.00125546	Colon_ALL	ILMN_2415267	RREB1
brown	0.720826	1.10455e-08	0.50438	0.000300376	Colon_ALL	ILMN_3179371	HNRNPK
green	0.465917	0.000965112	0.506128	0.000283913	Colon_ALL	ILMN_3179620	USP6
brown	0.847363	5.90327e-14	0.48242	0.000594732	Colon_ALL	ILMN_3181215	AGFG1
blue	0.748161	1.49722e-09	0.4257	0.00285235	Colon_ALL	ILMN_3187324	CNRIP1
brown	0.418789	0.00339251	0.466187	0.000957664	Colon_ALL	ILMN_3187862	DNAH14
blue	0.582265	1.75931e-05	0.42582	0.00284368	Colon_ALL	ILMN_3193798	IST1
brown	0.574942	2.36999e-05	0.416371	0.00360163	Colon_ALL	ILMN_3208881	KMT5A
brown	0.519555	0.000182247	0.503505	0.000308941	Colon_ALL	ILMN_3226669	TIMM23
green	0.694559	6.11537e-08	0.52103	0.00017339	Colon_ALL	ILMN_3230180
greenyellow	0.747258	1.60584e-09	0.416325	0.00360574	Colon_ALL	ILMN_3235185	SNRNP200
brown	0.782733	8.04327e-11	0.461553	0.00109254	Colon_ALL	ILMN_3236481	HIGD1A
brown	0.662771	3.86789e-07	0.66781	2.93035e-07	Colon_ALL	ILMN_3237270	2020-03-03
greenyellow	0.608105	5.79113e-06	0.427416	0.00273061	Colon_ALL	ILMN_3237324	MMS19
green	0.774454	1.69709e-10	0.491043	0.000457292	Colon_ALL	ILMN_3237830	NAT8L
green	0.871422	1.62155e-15	0.412177	0.00399137	Colon_ALL	ILMN_3238680	FMC1-LUC7L2
brown	0.849609	4.33526e-14	0.62808	2.28827e-06	Colon_ALL	ILMN_3239621	SNRNP27
brown	0.611497	4.96845e-06	0.4612	0.00110347	Colon_ALL	ILMN_3239789	YLPM1
blue	0.689801	8.17975e-08	0.449216	0.00153796	Colon_ALL	ILMN_3239861	SKIDA1
salmon	0.56128	4.0554e-05	0.493223	0.000427435	Colon_ALL	ILMN_3239881	PRSS36
greenyellow	0.554338	5.28065e-05	0.47234	0.000801662	Colon_ALL	ILMN_3239950	KHDC1L
salmon	0.612889	4.6634e-06	0.427813	0.00270315	Colon_ALL	ILMN_3239965	IDO1
black	0.58139	1.82378e-05	0.427352	0.00273511	Colon_ALL	ILMN_3241870	FRMD8
purple	0.750489	1.24822e-09	0.431696	0.00244674	Colon_ALL	ILMN_3242459	DCTPP1
salmon	0.773868	1.78699e-10	0.409132	0.00429711	Colon_ALL	ILMN_3242540	CD163L1
brown	0.773638	1.82356e-10	0.605979	6.36911e-06	Colon_ALL	ILMN_3242551	SDHC
black	0.47266	0.000794213	0.438846	0.00203036	Colon_ALL	ILMN_3243156	AHNAK2
blue	0.508058	0.000266689	0.563521	3.7194e-05	Colon_ALL	ILMN_3243381	MLEC
brown	0.623216	2.88599e-06	0.523767	0.000157979	Colon_ALL	ILMN_3245413	DENND5A
brown	0.782176	8.46676e-11	0.639932	1.27809e-06	Colon_ALL	ILMN_3248403	SDHC
blue	0.56037	4.19961e-05	0.420308	0.00326664	Colon_ALL	ILMN_3248521	UBXN8
black	0.600175	8.22899e-06	0.418907	0.00338256	Colon_ALL	ILMN_3250870	USP46
brown	0.765435	3.69657e-10	0.43604	0.00218563	Colon_ALL	ILMN_3250972	REPS2
brown	0.566523	3.30922e-05	0.426244	0.00281324	Colon_ALL	ILMN_3251379	SLC35E1
brown	0.753057	1.01889e-09	0.529172	0.000131145	Colon_ALL	ILMN_3251560	TMEM167A
blue	0.772953	1.93659e-10	0.427757	0.00270701	Colon_ALL	ILMN_3265343	TMEM35B
brown	0.809692	5.54333e-12	0.548246	6.62572e-05	Colon_ALL	ILMN_3303673	UMAD1
green	0.752789	1.04082e-09	0.607166	6.04002e-06	Colon_ALL	ILMN_3306852
brown	0.778452	1.18803e-10	0.514689	0.000214464	Colon_ALL	ILMN_3307409	RREB1
tan	0.872573	1.34128e-15	0.539391	9.14338e-05	Colon_ALL	ILMN_3307906	PALMD
green	0.525299	0.000149906	0.437642	0.00209577	Colon_ALL	J3KS22;Q7Z4W1;J3QS36;J3KRZ4;J3QL34;J3QS45;J3KSZ5	DCXR
yellow	0.726072	7.66731e-09	0.43218	0.00241637	Colon_ALL	J3KTA4;P17844	DDX5
greenyellow	0.407544	0.00446452	0.495332	0.000400234	Colon_ALL	J3QRS3;P19105;O14950	MYL12A;MYL12B
brown	0.554737	5.20194e-05	0.586787	1.45841e-05	Colon_ALL	K7ELL7;P14314	PRKCSH
brown	0.45463	0.00132572	0.422955	0.00305706	Colon_ALL	M0R165;Q9UBC2;M0R2S2	EPS15L1
green	0.626779	2.43578e-06	0.538556	9.42102e-05	Colon_ALL	O00763;F8W8T8	ACACB
brown	0.504446	0.000299741	0.478447	0.000669731	Colon_ALL	O14558;A0A1X7SC65;K7EP04	HSPB6
green	0.481695	0.000607827	0.543581	7.85987e-05	Colon_ALL	O14561;I3L505;H3BNK3	NDUFAB1
brown	0.569825	2.90629e-05	0.561792	3.97627e-05	Colon_ALL	O14807;C9J8Q6	MRAS
brown	0.459722	0.00115036	0.428664	0.00264497	Colon_ALL	O14949	UQCRQ
brown	0.444975	0.00172478	0.416357	0.00360288	Colon_ALL	O15488;A0A1W2PQ75	GYG2
brown	0.412669	0.00394383	0.438643	0.00204124	Colon_ALL	O43237;J3KRI4	DYNC1LI2
brown	0.405708	0.00466512	0.444197	0.00176116	Colon_ALL	O43399;A0A087WYR3;A0A087WZ51	TPD52L2
purple	0.55106	5.96969e-05	0.434999	0.00224583	Colon_ALL	O60437;K7EKI8;K7EQ71	PPL
yellow	0.591982	1.17153e-05	0.415373	0.00369121	Colon_ALL	O60664;K7ERZ3	PLIN3
greenyellow	0.541229	8.55842e-05	0.611996	4.85702e-06	Colon_ALL	O75368	SH3BGRL
brown	0.409557	0.00425323	0.429201	0.0026089	Colon_ALL	O75380;D6RBT3	NDUFS6
brown	0.586719	1.46257e-05	0.480977	0.000621056	Colon_ALL	O75781	PALM
blue	0.422143	0.00312009	0.479283	0.000653279	Colon_ALL	O75915	ARL6IP5
black	0.586593	1.47027e-05	0.630348	2.0508e-06	Colon_ALL	O95302	FKBP9
blue	0.513296	0.000224594	0.416684	0.00357397	Colon_ALL	O95865;A0A140T971;Q5SSV3;Q5SRR8;H0Y7N1	DDAH2
brown	0.58431	1.61681e-05	0.409695	0.00423906	Colon_ALL	P00338	LDHA
brown	0.503922	0.000304828	0.51431	0.000217182	Colon_ALL	P00488	F13A1
brown	0.507783	0.00026908	0.466389	0.000952137	Colon_ALL	P02511;E9PR44;A0A024R3B9;E9PJL7;E9PNH7;E9PRA8	CRYAB
red	0.582512	1.7415e-05	0.422537	0.00308931	Colon_ALL	P05387;H0YDD8	RPLP2
yellow	0.702417	3.73645e-08	0.46547	0.000977511	Colon_ALL	P06756	ITGAV
blue	0.56339	3.73831e-05	0.442218	0.00185679	Colon_ALL	P07195;A0A3B3IS95;A8MW50;C9J7H8	LDHB
green	0.465962	0.000963867	0.529532	0.000129512	Colon_ALL	P07900	HSP90AA1
greenyellow	0.466619	0.00094588	0.489123	0.000485137	Colon_ALL	P08648	ITGA5
green	0.580441	1.8961e-05	0.628333	2.26062e-06	Colon_ALL	P09417;B7Z415;D6RGG7	QDPR
brown	0.497607	0.000372648	0.498149	0.00036633	Colon_ALL	P09669	COX6C
green	0.563165	3.77102e-05	0.551882	5.78963e-05	Colon_ALL	P0DPI2;A0A0B4J2D5;A0A096LPI6;A0A096LNH5;H7C1F6;H7C2G3;A0A0B4J2H4	C21orf33
greenyellow	0.567219	3.22022e-05	0.512512	0.000230481	Colon_ALL	P10586;H0Y6Z7;H0Y4H1;H0Y7Z9	PTPRF
brown	0.413212	0.00389192	0.508008	0.000267116	Colon_ALL	P11182;Q5VVL7	DBT
green	0.501837	0.000325874	0.461019	0.00110913	Colon_ALL	P11234;C9J6B1;C9JQB3	RALB
greenyellow	0.463295	0.00103996	0.413965	0.00382093	Colon_ALL	P13928;A0A087WTN9;A0A075B765	ANXA8
brown	0.568709	3.03709e-05	0.457722	0.00121658	Colon_ALL	P14543	NID1
purple	0.444257	0.00175829	0.671954	2.32304e-07	Colon_ALL	P16035;B4DFW2	TIMP2
brown	0.472348	0.000801465	0.474057	0.000762402	Colon_ALL	P16930	FAH
purple	0.484559	0.000557559	0.52138	0.000171346	Colon_ALL	P21333	FLNA
brown	0.607611	5.92104e-06	0.452947	0.00138869	Colon_ALL	P21695	GPD1
green	0.582619	1.73386e-05	0.437239	0.00211805	Colon_ALL	P24298	GPT
blue	0.544759	7.52989e-05	0.41265	0.00394567	Colon_ALL	P27361;E9PQW4;E9PBK7;E9PJF0;B3KR49	MAPK3
brown	0.602248	7.51357e-06	0.613443	4.54674e-06	Colon_ALL	P27824	CANX
brown	0.586757	1.46024e-05	0.59169	1.18615e-05	Colon_ALL	P29966	MARCKS
blue	0.438176	0.0020665	0.452536	0.0014045	Colon_ALL	P31323	PRKAR2B
green	0.489953	0.000472921	0.474339	0.00075612	Colon_ALL	P31937	HIBADH
black	0.610196	5.27031e-06	0.453709	0.00135984	Colon_ALL	P36269	GGT5
brown	0.508107	0.000266257	0.400125	0.00532454	Colon_ALL	P46108;I3L297	CRK
brown	0.560477	4.18237e-05	0.514104	0.000218667	Colon_ALL	P47712	PLA2G4A
greenyellow	0.460368	0.00112964	0.50933	0.000255858	Colon_ALL	P49407;E9PM35	ARRB1
brown	0.509029	0.000258382	0.64244	1.12626e-06	Colon_ALL	P51572;A0A2R8Y5M6;C9JSP1;C9JQ75;C9J0M4;C9JMD7	BCAP31
blue	0.426729	0.00277879	0.425812	0.00284427	Colon_ALL	P51649;C9J8Q5	ALDH5A1
magenta	0.587128	1.43772e-05	0.461936	0.00108079	Colon_ALL	P51888	PRELP
brown	0.576638	2.21332e-05	0.461041	0.00110842	Colon_ALL	P53384	NUBP1
grey	0.413871	0.00382973	0.438	0.00207612	Colon_ALL	P61009	SPCS3
red	0.512221	0.000232708	0.468678	0.000891515	Colon_ALL	P61586;C9JNR4;C9JX21	RHOA
brown	0.615384	4.15936e-06	0.537615	9.74292e-05	Colon_ALL	P61981	YWHAG
turquoise	0.480732	0.000625623	0.517852	0.000192987	Colon_ALL	P62312	LSM6
green	0.658933	4.76207e-07	0.553854	5.37757e-05	Colon_ALL	P63096;A0A3B3ITM0	GNAI1
yellow	0.470506	0.000845575	0.400052	0.00533363	Colon_ALL	P68104;Q5VTE0;A0A087WVQ9;A0A087WV01	EEF1A1;EEF1A1P5
greenyellow	0.481247	0.000616045	0.551572	5.8569e-05	Colon_ALL	P84103;A0A087X2D0	SRSF3
green	0.632364	1.85907e-06	0.489793	0.000475256	Colon_ALL	Q02252	ALDH6A1
brown	0.561103	4.0831e-05	0.507474	0.000271794	Colon_ALL	Q02750	MAP2K1
blue	0.554449	5.25868e-05	0.415943	0.00363978	Colon_ALL	Q02952	AKAP12
salmon	0.658623	4.84196e-07	0.536703	0.000100646	Colon_ALL	Q12792;F8VS81	TWF1
blue	0.51992	0.000180018	0.507024	0.000275796	Colon_ALL	Q12797	ASPH
black	0.730273	5.68926e-09	0.495982	0.000392169	Colon_ALL	Q13326	SGCG
brown	0.524444	0.000154363	0.496186	0.00038967	Colon_ALL	Q14515	SPARCL1
blue	0.496492	0.000385946	0.4248	0.00291811	Colon_ALL	Q14678	KANK1
blue	0.594582	1.0484e-05	0.423553	0.00301137	Colon_ALL	Q15599;H3BUQ9;H3BN50;H3BQS0	SLC9A3R2
turquoise	0.609315	5.48429e-06	0.569302	2.96693e-05	Colon_ALL	Q15717	ELAVL1
brown	0.571849	2.68207e-05	0.599044	8.64533e-06	Colon_ALL	Q15811;F8W7U0;A8CTZ0	ITSN1
greenyellow	0.473768	0.00076889	0.507	0.000276005	Colon_ALL	Q16555;A0A1C7CYX9	DPYSL2
turquoise	0.454185	0.00134211	0.439571	0.00199187	Colon_ALL	Q16778;P33778;P23527;P06899	HIST2H2BE;HIST1H2BB;HIST1H2BO;HIST1H2BJ
yellow	0.604422	6.82542e-06	0.404372	0.00481602	Colon_ALL	Q32P28	LEPRE1
green	0.536475	0.000101468	0.432736	0.00238184	Colon_ALL	Q5VT66;H7BYZ9	2020-03-01
purple	0.630812	2.00508e-06	0.507247	0.000273808	Colon_ALL	Q6EMK4	VASN
brown	0.546674	7.02026e-05	0.50832	0.000264424	Colon_ALL	Q6IB77	GLYAT
greenyellow	0.487537	0.000509284	0.488926	0.000488089	Colon_ALL	Q6ZN40	TPM1
brown	0.427244	0.00274261	0.452023	0.00142442	Colon_ALL	Q7Z7H5	TMED4
turquoise	0.464408	0.00100757	0.603012	7.26491e-06	Colon_ALL	Q86UE4;E5RJU9	MTDH
brown	0.565013	3.50998e-05	0.516194	0.000203985	Colon_ALL	Q86UU1	PHLDB1
greenyellow	0.650427	7.47159e-07	0.524797	0.000152508	Colon_ALL	Q8IUX7	AEBP1
brown	0.460669	0.00112011	0.413335	0.00388028	Colon_ALL	Q8IWE4	DCUN1D3
salmon	0.546057	7.18093e-05	0.499919	0.000346383	Colon_ALL	Q8IYI6	EXOC8
turquoise	0.640668	1.23166e-06	0.755611	8.30594e-10	Colon_ALL	Q8N138;J3KTF9;J3QRM9	ORMDL3
green	0.582503	1.74217e-05	0.40337	0.00493205	Colon_ALL	Q8N335;C9JFA7;C9JM46	GPD1L
brown	0.406255	0.00460454	0.449737	0.0015163	Colon_ALL	Q8N8N7;G3V3Y1;G3V2R9	PTGR2
brown	0.467351	0.000926232	0.478323	0.000672204	Colon_ALL	Q8TDX7	NEK7
brown	0.604711	6.73862e-06	0.527635	0.000138317	Colon_ALL	Q8WTS6;D6RJA0	SETD7
greenyellow	0.648701	8.17295e-07	0.4753	0.00073506	Colon_ALL	Q8WUT4	LRRN4
turquoise	0.551935	5.7782e-05	0.466483	0.00094959	Colon_ALL	Q8WXH0;G3V5X4;A0A0A0MRE3;A0A0C4DGK3	SYNE2
brown	0.526326	0.000144707	0.498882	0.000357944	Colon_ALL	Q96B97;Q5JPT2	SH3KBP1
black	0.693201	6.6487e-08	0.409463	0.00426285	Colon_ALL	Q96C23;H7C320	GALM
green	0.549684	6.2826e-05	0.565773	3.40763e-05	Colon_ALL	Q96DC8;Q5W0J6;Q5W0J8	ECHDC3
tan	0.480883	0.000622798	0.598831	8.7256e-06	Colon_ALL	Q96DG6	CMBL
blue	0.567451	3.1911e-05	0.505435	0.000290343	Colon_ALL	Q9BRQ8	AIFM2
grey	0.647846	8.54241e-07	0.488096	0.00050065	Colon_ALL	Q9BS40	LXN
greenyellow	0.502536	0.000318676	0.531415	0.000121283	Colon_ALL	Q9BTV4	TMEM43
brown	0.627315	2.37398e-06	0.472754	0.000792021	Colon_ALL	Q9BX66	SORBS1
blue	0.435009	0.00224525	0.55528	5.09658e-05	Colon_ALL	Q9BXW6	OSBPL1A
green	0.637517	1.442e-06	0.433597	0.00232928	Colon_ALL	Q9BY49	PECR
brown	0.499597	0.000349929	0.54445	7.61525e-05	Colon_ALL	Q9H0U4;E9PLD0	RAB1B
brown	0.47199	0.000809881	0.460605	0.00112214	Colon_ALL	Q9H2U2;D6R967;H0Y9D8	PPA2
black	0.653939	6.21419e-07	0.612852	4.6713e-06	Colon_ALL	Q9H4G4;Q5VZR0	GLIPR2
brown	0.486375	0.000527652	0.636258	1.53504e-06	Colon_ALL	Q9HB90;Q9NQL2	RRAGC;RRAGD
green	0.694358	6.1916e-08	0.411806	0.00402754	Colon_ALL	Q9NR19	ACSS2
green	0.579153	1.99852e-05	0.471831	0.00081365	Colon_ALL	Q9UPQ0;D6RD46;H0Y8P3;G5EA03;E7EPK0;E9PDJ9	LIMCH1
green	0.521784	0.000169011	0.511958	0.000234734	Colon_ALL	Q9Y266;A0A0A0MSS4;A0A0A0MSU9	NUDC
brown	0.513242	0.000224992	0.441054	0.00191514	Colon_ALL	Q9Y4G6;A0A1B0GVU7;H0YMT1	TLN2
turquoise	0.447599	0.00160694	0.469839	0.000862094	Colon_ALL	Q9Y570	PPME1
brown	0.437113	0.00212509	0.438383	0.00205528	Colon_ALL	Q9Y6C9	MTCH2
turquoise	0.677829	1.66064e-07	0.651254	7.15594e-07	Colon_Resistant	A0A087WWM0;O43617;A0A087WYS5	TRAPPC3
magenta	0.40673	0.00455253	0.441375	0.00189887	Colon_Resistant	A0A0A0MSW4;P48739;B3KYB6	PITPNB
blue	0.421696	0.00315517	0.453393	0.00137174	Colon_Resistant	B7WPE2;Q32P44;G3V195;H0Y3M3;G3V1D0	EML3
grey	0.452687	0.00139865	0.451267	0.00145422	Colon_Resistant	E5RFP0;Q8WVJ2	NUDCD2
salmon	0.490002	0.00047221	0.581521	1.81402e-05	Colon_Resistant	H0YI09;Q9H8H3;F8VQX6	METTL7A
turquoise	0.699426	4.51551e-08	0.420383	0.00326046	Colon_Resistant	ILMN_1651900	KCNA4
salmon	0.72836	6.52194e-09	0.422778	0.00307073	Colon_Resistant	ILMN_1651964	ABCC5
brown	0.670803	2.47875e-07	0.406181	0.0046127	Colon_Resistant	ILMN_1652394	RAB2A
blue	0.459517	0.001157	0.456772	0.00124922	Colon_Resistant	ILMN_1652525	MVB12B
salmon	0.792469	3.20363e-11	0.485201	0.000546822	Colon_Resistant	ILMN_1653220	PITPNM1
greenyellow	0.589435	1.30497e-05	0.410266	0.0041809	Colon_Resistant	ILMN_1654268	HMGB2
salmon	0.762046	4.90898e-10	0.467262	0.000928601	Colon_Resistant	ILMN_1654411	CCL18
brown	0.553949	5.35844e-05	0.420754	0.00323047	Colon_Resistant	ILMN_1655796	2020-03-03
salmon	0.725457	8.00597e-09	0.497923	0.000368947	Colon_Resistant	ILMN_1655987	STAB1
salmon	0.592281	1.15671e-05	0.470865	0.000836824	Colon_Resistant	ILMN_1656310	IDO1
salmon	0.479196	0.000654975	0.434526	0.0022737	Colon_Resistant	ILMN_1659792	HOXD9
red	0.5912	1.2111e-05	0.415836	0.00364938	Colon_Resistant	ILMN_1664303	HTATIP2
blue	0.527658	0.000138209	0.401588	0.00514436	Colon_Resistant	ILMN_1664330	CEACAM1
salmon	0.572292	2.63516e-05	0.428424	0.00266129	Colon_Resistant	ILMN_1664644	ATG16L2
brown	0.540251	8.86543e-05	0.416178	0.00361884	Colon_Resistant	ILMN_1664772	ATP2B4
magenta	0.518703	0.000187546	0.447616	0.00160619	Colon_Resistant	ILMN_1664798	GRHPR
salmon	0.704323	3.30761e-08	0.421028	0.00320838	Colon_Resistant	ILMN_1667707	SPCS3
green	0.543496	7.88407e-05	0.410735	0.00413368	Colon_Resistant	ILMN_1668469	TMEM131L
salmon	0.4821	0.000600479	0.406037	0.00462858	Colon_Resistant	ILMN_1668629	C4orf48
brown	0.418504	0.00341658	0.404925	0.00475312	Colon_Resistant	ILMN_1669032	PPIC
salmon	0.863294	5.8915e-15	0.497164	0.000377882	Colon_Resistant	ILMN_1669376	DRAM1
salmon	0.518072	0.000191565	0.417837	0.0034735	Colon_Resistant	ILMN_1670572	IDO2
purple	0.613429	4.54983e-06	0.42508	0.00289749	Colon_Resistant	ILMN_1673966	POLR3F
blue	0.469963	0.000858998	0.410054	0.00420241	Colon_Resistant	ILMN_1674367	SPRR2F
magenta	0.526668	0.000143013	0.483753	0.000571321	Colon_Resistant	ILMN_1674661	CIRBP
brown	0.663293	3.75919e-07	0.497114	0.000378466	Colon_Resistant	ILMN_1676296	PLPP1
salmon	0.82063	1.6549e-12	0.446375	0.00166099	Colon_Resistant	ILMN_1676372	CD209
turquoise	0.546547	7.05301e-05	0.427306	0.00273828	Colon_Resistant	ILMN_1676749	MAATS1
greenyellow	0.489098	0.00048551	0.4093	0.00427965	Colon_Resistant	ILMN_1678037	HIRIP3
greenyellow	0.512514	0.000230471	0.436815	0.00214172	Colon_Resistant	ILMN_1678934	POLR1E
magenta	0.708578	2.51085e-08	0.436589	0.00215445	Colon_Resistant	ILMN_1680110	ADIRF
brown	0.411487	0.00405889	0.535251	0.000105967	Colon_Resistant	ILMN_1680937	HIST1H2BC
turquoise	0.623177	2.89129e-06	0.401609	0.00514174	Colon_Resistant	ILMN_1682326	PCP4
green	0.545684	7.27957e-05	0.544725	7.53922e-05	Colon_Resistant	ILMN_1682404	SETMAR
greenyellow	0.523443	0.000159733	0.519628	0.000181799	Colon_Resistant	ILMN_1682658	EPM2AIP1
turquoise	0.44543	0.0017038	0.404641	0.00478529	Colon_Resistant	ILMN_1682930	SIPA1
greenyellow	0.472187	0.000805244	0.42105	0.00320663	Colon_Resistant	ILMN_1683263	TSPAN8
salmon	0.584039	1.63508e-05	0.492329	0.000439463	Colon_Resistant	ILMN_1685005	TNFRSF1A
greenyellow	0.545497	7.32943e-05	0.468725	0.000890287	Colon_Resistant	ILMN_1687840	ABCB7
turquoise	0.415397	0.00368908	0.406334	0.00459582	Colon_Resistant	ILMN_1688279	PVRIG
red	0.58381	1.65064e-05	0.406574	0.00456951	Colon_Resistant	ILMN_1688480	CCND1
blue	0.422755	0.00307248	0.485483	0.000542151	Colon_Resistant	ILMN_1689086	CTSC
blue	0.504844	0.00029592	0.451614	0.00144048	Colon_Resistant	ILMN_1690241	BATF2
salmon	0.556207	4.92131e-05	0.40125	0.00518551	Colon_Resistant	ILMN_1691410	BAMBI
black	0.651325	7.12926e-07	0.435728	0.00220351	Colon_Resistant	ILMN_1691747	KHDRBS3
purple	0.610402	5.22151e-06	0.444675	0.00173872	Colon_Resistant	ILMN_1694057	EIF3K
greenyellow	0.57053	2.82628e-05	0.469446	0.00087196	Colon_Resistant	ILMN_1695706	H3F3B
salmon	0.840823	1.41097e-13	0.427412	0.00273094	Colon_Resistant	ILMN_1696347	CTSC
black	0.461311	0.00110004	0.424083	0.00297141	Colon_Resistant	ILMN_1697024	STYX
salmon	0.574299	2.43193e-05	0.433684	0.00232403	Colon_Resistant	ILMN_1697220	NT5E
salmon	0.878842	4.61594e-16	0.40595	0.00463825	Colon_Resistant	ILMN_1698019	LGMN
salmon	0.55677	4.81733e-05	0.420518	0.00324957	Colon_Resistant	ILMN_1699585	BHLHE22
salmon	0.582872	1.71585e-05	0.40755	0.00446381	Colon_Resistant	ILMN_1700408	TRIM50
yellow	0.559124	4.40473e-05	0.466992	0.000935816	Colon_Resistant	ILMN_1701731	AKR1B1
turquoise	0.507571	0.000270936	0.415845	0.00364864	Colon_Resistant	ILMN_1702447	IGF2BP2
turquoise	0.635636	1.583e-06	0.400891	0.00522947	Colon_Resistant	ILMN_1702503	ALDH3A1
turquoise	0.470246	0.000851985	0.418579	0.00341021	Colon_Resistant	ILMN_1704101	HSF4
green	0.483732	0.000571669	0.407034	0.00451951	Colon_Resistant	ILMN_1705397	PDK2
magenta	0.565843	3.39825e-05	0.475705	0.00072634	Colon_Resistant	ILMN_1707342	LRIG1
brown	0.603165	7.21611e-06	0.439293	0.00200656	Colon_Resistant	ILMN_1707612	VEGFD
brown	0.644507	1.01393e-06	0.488919	0.00048819	Colon_Resistant	ILMN_1708782	MFAP3
brown	0.541397	8.50668e-05	0.401909	0.0051055	Colon_Resistant	ILMN_1709486	SRPX
salmon	0.666945	3.07466e-07	0.482379	0.00059546	Colon_Resistant	ILMN_1709750	SUSD1
blue	0.485803	0.000536915	0.481976	0.00060272	Colon_Resistant	ILMN_1711799	C9orf40
red	0.489965	0.000472745	0.489239	0.000483412	Colon_Resistant	ILMN_1714988	HOXD8
greenyellow	0.483631	0.000573416	0.460526	0.00112464	Colon_Resistant	ILMN_1715458	PCDH10
blue	0.58828	1.36995e-05	0.442926	0.00182207	Colon_Resistant	ILMN_1716815	CEACAM1
salmon	0.773499	1.84602e-10	0.417986	0.00346075	Colon_Resistant	ILMN_1717163	F13A1
salmon	0.753941	9.49565e-10	0.420877	0.00322052	Colon_Resistant	ILMN_1717334	VAV1
turquoise	0.402874	0.00499033	0.408984	0.0043124	Colon_Resistant	ILMN_1719660	SMPDL3B
magenta	0.751881	1.1185e-09	0.407855	0.00443131	Colon_Resistant	ILMN_1720542	POLR2I
blue	0.500852	0.00033626	0.473955	0.000764684	Colon_Resistant	ILMN_1721495	ADAMTSL2
green	0.42051	0.00325018	0.42691	0.00276606	Colon_Resistant	ILMN_1723287	SLC6A16
salmon	0.874169	1.02793e-15	0.402172	0.00507388	Colon_Resistant	ILMN_1724533	LY96
salmon	0.748511	1.45697e-09	0.46496	0.000991845	Colon_Resistant	ILMN_1725320	SIGLEC1
yellow	0.410673	0.00413989	0.497445	0.000374554	Colon_Resistant	ILMN_1726230	CD1B
brown	0.448194	0.00158125	0.614279	4.37614e-06	Colon_Resistant	ILMN_1726245	TGFBR2
yellow	0.636319	1.53037e-06	0.429925	0.00256091	Colon_Resistant	ILMN_1727043	COLGALT1
blue	0.447245	0.0016224	0.4578	0.00121394	Colon_Resistant	ILMN_1729368	FZD8
salmon	0.842198	1.17872e-13	0.480449	0.00063095	Colon_Resistant	ILMN_1730816	GPR162
brown	0.572417	2.62209e-05	0.413364	0.00387752	Colon_Resistant	ILMN_1731349	HOXA13
red	0.683762	1.17403e-07	0.545462	7.33906e-05	Colon_Resistant	ILMN_1732538	LBP
salmon	0.766991	3.2398e-10	0.40298	0.00497786	Colon_Resistant	ILMN_1732919	LILRB5
brown	0.582191	1.76471e-05	0.527453	0.000139189	Colon_Resistant	ILMN_1733756	COL12A1
yellow	0.701689	3.91343e-08	0.44278	0.00182914	Colon_Resistant	ILMN_1735155	GLB1
salmon	0.643074	1.09066e-06	0.44521	0.00171393	Colon_Resistant	ILMN_1735764	HTR2B
black	0.638474	1.37481e-06	0.439424	0.00199961	Colon_Resistant	ILMN_1736242	PLEKHG4
brown	0.666767	3.10501e-07	0.436214	0.00217572	Colon_Resistant	ILMN_1738132	HOXA11
brown	0.850595	3.77955e-14	0.517323	0.000196438	Colon_Resistant	ILMN_1739161	PLPP1
purple	0.53819	9.54502e-05	0.45323	0.00137794	Colon_Resistant	ILMN_1739576	CYB5R2
salmon	0.661407	4.16597e-07	0.472326	0.000801973	Colon_Resistant	ILMN_1741171	TM2D2
salmon	0.812547	4.07413e-12	0.400115	0.00532574	Colon_Resistant	ILMN_1741712	MS4A4A
greenyellow	0.887639	9.31606e-17	0.448348	0.00157464	Colon_Resistant	ILMN_1742379	IFT122
salmon	0.624956	2.65725e-06	0.403905	0.0048698	Colon_Resistant	ILMN_1744212	INPP5D
blue	0.477015	0.000698783	0.400527	0.00527442	Colon_Resistant	ILMN_1745242	PLSCR1
pink	0.503014	0.000313839	0.459382	0.00116136	Colon_Resistant	ILMN_1746712	TSHR
magenta	0.451253	0.00145479	0.521825	0.000168775	Colon_Resistant	ILMN_1748840	CALB2
brown	0.638033	1.40541e-06	0.514137	0.000218429	Colon_Resistant	ILMN_1751120	HIST1H4H
brown	0.515664	0.000207624	0.400239	0.00531031	Colon_Resistant	ILMN_1751234	C1GALT1C1
turquoise	0.409313	0.00427831	0.437531	0.00210189	Colon_Resistant	ILMN_1753745	HDDC2
greenyellow	0.613803	4.47249e-06	0.46711	0.000932659	Colon_Resistant	ILMN_1755234	SSH3
green	0.461498	0.00109423	0.515652	0.000207702	Colon_Resistant	ILMN_1758705	IRX6
magenta	0.484119	0.000565025	0.403964	0.00486302	Colon_Resistant	ILMN_1759017	ZNF333
greenyellow	0.503265	0.000311326	0.498127	0.000366587	Colon_Resistant	ILMN_1760049	SERGEF
tan	0.546234	7.13452e-05	0.461361	0.00109849	Colon_Resistant	ILMN_1760778	ENG
salmon	0.652323	6.76604e-07	0.411533	0.00405436	Colon_Resistant	ILMN_1760849	NETO2
greenyellow	0.586781	1.45873e-05	0.516787	0.00019999	Colon_Resistant	ILMN_1762281	DCTN3
purple	0.773906	1.78116e-10	0.410402	0.00416714	Colon_Resistant	ILMN_1763080	QARS
salmon	0.735597	3.86689e-09	0.438913	0.0020268	Colon_Resistant	ILMN_1764383	MCOLN1
salmon	0.591358	1.20299e-05	0.577664	2.12333e-05	Colon_Resistant	ILMN_1764577	MFNG
pink	0.418543	0.00341328	0.405078	0.00473573	Colon_Resistant	ILMN_1764714	ANGPTL8
salmon	0.721784	1.03395e-08	0.400858	0.00523362	Colon_Resistant	ILMN_1766955	VCAM1
blue	0.462294	0.00106988	0.519749	0.000181057	Colon_Resistant	ILMN_1767129	ABCC8
magenta	0.702651	3.68118e-08	0.442213	0.00185702	Colon_Resistant	ILMN_1767351	AR
brown	0.464165	0.00101457	0.415446	0.00368459	Colon_Resistant	ILMN_1767470	SCPEP1
greenyellow	0.563324	3.74793e-05	0.496457	0.00038637	Colon_Resistant	ILMN_1768425	TF
brown	0.668347	2.84416e-07	0.439009	0.00202163	Colon_Resistant	ILMN_1770247
salmon	0.590019	1.27318e-05	0.466839	0.000939936	Colon_Resistant	ILMN_1770922	TMEM45A
brown	0.430814	0.002503	0.529502	0.000129651	Colon_Resistant	ILMN_1771376	PEA15
magenta	0.680421	1.42863e-07	0.600079	8.26352e-06	Colon_Resistant	ILMN_1771593	RRM1
brown	0.486489	0.000525824	0.447539	0.00160955	Colon_Resistant	ILMN_1772370	ARHGEF1
red	0.615939	4.05442e-06	0.420716	0.00323352	Colon_Resistant	ILMN_1772612	ANGPTL2
salmon	0.814791	3.18662e-12	0.436421	0.00216397	Colon_Resistant	ILMN_1773389	PLTP
purple	0.579236	1.99177e-05	0.56787	3.13899e-05	Colon_Resistant	ILMN_1774077	GBP2
turquoise	0.577569	2.13148e-05	0.434486	0.00227606	Colon_Resistant	ILMN_1774761	CCR2
purple	0.836091	2.5878e-13	0.410988	0.0041084	Colon_Resistant	ILMN_1774890	LAS1L
yellow	0.441285	0.00190341	0.456405	0.00126206	Colon_Resistant	ILMN_1776109	ZNF622
turquoise	0.607792	5.87295e-06	0.429108	0.00261511	Colon_Resistant	ILMN_1776395	ARMC4
greenyellow	0.628029	2.29385e-06	0.409491	0.00426002	Colon_Resistant	ILMN_1776490	C17orf53
black	0.739591	2.8767e-09	0.431129	0.00248281	Colon_Resistant	ILMN_1777397	MSX1
turquoise	0.533662	0.000112085	0.452794	0.00139456	Colon_Resistant	ILMN_1778213	STK33
magenta	0.463207	0.00104258	0.425194	0.00288913	Colon_Resistant	ILMN_1779492	SMURF1
blue	0.545455	7.34086e-05	0.405118	0.00473127	Colon_Resistant	ILMN_1781526	PPP1R8
brown	0.756104	7.98267e-10	0.468219	0.000903392	Colon_Resistant	ILMN_1781791	PRRG1
magenta	0.420827	0.00322452	0.441946	0.00187027	Colon_Resistant	ILMN_1784407	FILIP1L
salmon	0.815665	2.89302e-12	0.522386	0.000165588	Colon_Resistant	ILMN_1785005	NCF4
brown	0.68832	8.94506e-08	0.418662	0.00340317	Colon_Resistant	ILMN_1785356	DENND5A
brown	0.515334	0.000209914	0.426908	0.00276618	Colon_Resistant	ILMN_1789136	SERF2
blue	0.409628	0.00424594	0.542018	8.31798e-05	Colon_Resistant	ILMN_1791447	CXCL12
blue	0.663973	3.62196e-07	0.445206	0.00171409	Colon_Resistant	ILMN_1792078	RNF114
brown	0.653874	6.23549e-07	0.528988	0.000131984	Colon_Resistant	ILMN_1792689	HIST1H2AC
salmon	0.773337	1.87247e-10	0.516309	0.000203204	Colon_Resistant	ILMN_1792885	CTSC
blue	0.491425	0.000451935	0.440202	0.00195892	Colon_Resistant	ILMN_1794782	ABCG1
turquoise	0.461087	0.00110699	0.425319	0.00288003	Colon_Resistant	ILMN_1795170	SLITRK2
salmon	0.631291	1.95896e-06	0.433396	0.00234142	Colon_Resistant	ILMN_1795949	CORO7
blue	0.519148	0.000184764	0.42848	0.00265746	Colon_Resistant	ILMN_1796089	NKX2-3
greenyellow	0.64817	8.40058e-07	0.464271	0.00101152	Colon_Resistant	ILMN_1798496	HOXB8
brown	0.517269	0.000196788	0.447488	0.00161176	Colon_Resistant	ILMN_1798663	MAB21L2
magenta	0.698639	4.74442e-08	0.457633	0.00121961	Colon_Resistant	ILMN_1800796	RPL37
greenyellow	0.769707	2.56769e-10	0.461228	0.00110261	Colon_Resistant	ILMN_1801421	EMD
brown	0.747202	1.61277e-09	0.401337	0.00517485	Colon_Resistant	ILMN_1801767	ABHD3
salmon	0.854619	2.13772e-14	0.455718	0.00128638	Colon_Resistant	ILMN_1802780	CD163L1
purple	0.499242	0.000353888	0.406586	0.0045682	Colon_Resistant	ILMN_1806030	PPL
salmon	0.797228	2.00639e-11	0.516169	0.000204159	Colon_Resistant	ILMN_1806165	HSPA6
greenyellow	0.752488	1.06597e-09	0.404876	0.00475863	Colon_Resistant	ILMN_1806432	NT5C
turquoise	0.47219	0.000805164	0.413113	0.00390131	Colon_Resistant	ILMN_1806612	OTX1
turquoise	0.484817	0.000553222	0.408005	0.00441533	Colon_Resistant	ILMN_1808395	ACAP1
brown	0.578821	2.02578e-05	0.4628	0.00105466	Colon_Resistant	ILMN_1808417	NPHP4
salmon	0.720112	1.1601e-08	0.425514	0.00286584	Colon_Resistant	ILMN_1811890	RGS10
blue	0.562483	3.87165e-05	0.40244	0.00504183	Colon_Resistant	ILMN_1844919	EBF2
brown	0.562157	3.92076e-05	0.531794	0.000119684	Colon_Resistant	ILMN_1886422	FGF7
magenta	0.829133	6.10286e-13	0.442233	0.00185602	Colon_Resistant	ILMN_2056606	PPP1R1A
brown	0.607487	5.95402e-06	0.43137	0.00246744	Colon_Resistant	ILMN_2059689	TMEM54
salmon	0.522704	0.00016381	0.468444	0.000897537	Colon_Resistant	ILMN_2067408	CLRN3
greenyellow	0.694266	6.2271e-08	0.495022	0.00040413	Colon_Resistant	ILMN_2077094	TM7SF2
turquoise	0.537111	9.91978e-05	0.416295	0.00360835	Colon_Resistant	ILMN_2087080	RPL5
greenyellow	0.58474	1.58819e-05	0.453867	0.00135396	Colon_Resistant	ILMN_2110167	POLR1E
blue	0.591014	1.22068e-05	0.405523	0.00468576	Colon_Resistant	ILMN_2112638	SVEP1
magenta	0.49386	0.000419051	0.511699	0.00023674	Colon_Resistant	ILMN_2128795	LRIG1
pink	0.482473	0.000593779	0.523335	0.000160323	Colon_Resistant	ILMN_2129505	CYB561A3
green	0.562019	3.94159e-05	0.40378	0.00488431	Colon_Resistant	ILMN_2157219	AASS
brown	0.621063	3.19412e-06	0.502308	0.00032101	Colon_Resistant	ILMN_2172318	TAFA2
greenyellow	0.668671	2.79313e-07	0.41163	0.00404483	Colon_Resistant	ILMN_2179717	FAM189A2
salmon	0.600521	8.10533e-06	0.481676	0.000608177	Colon_Resistant	ILMN_2193817	CLEC4G
brown	0.519531	0.000182392	0.508743	0.000260806	Colon_Resistant	ILMN_2201678	FSTL1
salmon	0.602001	7.59593e-06	0.467297	0.000927665	Colon_Resistant	ILMN_2211739	SLC15A2
black	0.414485	0.0037726	0.447008	0.00163284	Colon_Resistant	ILMN_2218002	LIPC
blue	0.462681	0.00105823	0.450776	0.00147389	Colon_Resistant	ILMN_2294123	SEPTIN4
salmon	0.68011	1.45476e-07	0.444527	0.00174561	Colon_Resistant	ILMN_2307903	VCAM1
brown	0.454395	0.00133437	0.471391	0.000824125	Colon_Resistant	ILMN_2329679	TPST2
blue	0.435042	0.00224336	0.457887	0.00121098	Colon_Resistant	ILMN_2329927	ABCG1
salmon	0.842141	1.18761e-13	0.410111	0.00419659	Colon_Resistant	ILMN_2331082	MS4A7
salmon	0.783086	7.7859e-11	0.488986	0.000487185	Colon_Resistant	ILMN_2331087	MS4A7
salmon	0.808039	6.60979e-12	0.410498	0.00415751	Colon_Resistant	ILMN_2333670	RNASE1
salmon	0.704833	3.20106e-08	0.493326	0.000426068	Colon_Resistant	ILMN_2335704	NCF4
salmon	0.778898	1.14119e-10	0.411891	0.00401929	Colon_Resistant	ILMN_2338452	SERPINA1
salmon	0.883115	2.1561e-16	0.441725	0.00188133	Colon_Resistant	ILMN_2339294	LILRB5
brown	0.742879	2.24599e-09	0.537607	9.74568e-05	Colon_Resistant	ILMN_2343278	PLPP1
salmon	0.730238	5.70348e-09	0.519665	0.00018157	Colon_Resistant	ILMN_2352380	TRPM2
turquoise	0.536072	0.000102929	0.441478	0.00189371	Colon_Resistant	ILMN_2355486	FAM3B
blue	0.513096	0.000226086	0.458342	0.00119571	Colon_Resistant	ILMN_2371724	CEACAM1
brown	0.404537	0.00479717	0.435454	0.00221934	Colon_Resistant	ILMN_2380850	ENTR1
salmon	0.752254	1.08596e-09	0.41145	0.00406259	Colon_Resistant	ILMN_2382657	ARHGAP9
brown	0.667085	3.05085e-07	0.630165	2.06902e-06	Colon_Resistant	ILMN_2384241	TGFBR2
yellow	0.689319	8.42177e-08	0.406457	0.00458238	Colon_Resistant	ILMN_2397721	GLB1
salmon	0.73644	3.63443e-09	0.457709	0.00121702	Colon_Resistant	ILMN_2397750	IVNS1ABP
salmon	0.606597	6.19574e-06	0.446267	0.00166581	Colon_Resistant	ILMN_2403852	CYTH1
brown	0.554487	5.25114e-05	0.414638	0.00375847	Colon_Resistant	ILMN_2414268	COLEC11
turquoise	0.409885	0.00421961	0.404703	0.00477828	Colon_Resistant	ILMN_3234884	KIF22
magenta	0.473588	0.000772938	0.490834	0.000460256	Colon_Resistant	ILMN_3235379	CALB2
magenta	0.550766	6.03536e-05	0.429729	0.00257381	Colon_Resistant	ILMN_3237645	LRTOMT
salmon	0.56128	4.0554e-05	0.47375	0.000769295	Colon_Resistant	ILMN_3239881	PRSS36
salmon	0.612889	4.6634e-06	0.519588	0.000182047	Colon_Resistant	ILMN_3239965	IDO1
blue	0.508058	0.000266689	0.418525	0.00341478	Colon_Resistant	ILMN_3243381	MLEC
salmon	0.577836	2.10855e-05	0.423382	0.00302439	Colon_Resistant	ILMN_3245066	DENND4B
greenyellow	0.405903	0.00464341	0.510926	0.000242832	Colon_Resistant	ILMN_3250798	C11orf58
blue	0.432975	0.00236712	0.424383	0.002949	Colon_Resistant	J3QLD9;E7EMK3;Q14254	FLOT2
blue	0.574605	2.40226e-05	0.531244	0.000122011	Colon_Resistant	K4DIA7;P48509;E9PMR4;E9PRJ3	CD151
green	0.42199	0.00313204	0.587916	1.39107e-05	Colon_Resistant	O00161;H3BM38;H3BNE1;H3BR18;H3BPJ0	SNAP23
salmon	0.672973	2.19281e-07	0.630063	2.07936e-06	Colon_Resistant	O14828	SCAMP3
purple	0.55106	5.96969e-05	0.445866	0.00168392	Colon_Resistant	O60437;K7EKI8;K7EQ71	PPL
yellow	0.465467	0.000977601	0.429083	0.00261677	Colon_Resistant	O60701	UGDH
greenyellow	0.541229	8.55842e-05	0.479037	0.000658082	Colon_Resistant	O75368	SH3BGRL
blue	0.422143	0.00312009	0.464641	0.00100092	Colon_Resistant	O75915	ARL6IP5
blue	0.531701	0.000120076	0.421877	0.00314089	Colon_Resistant	O76024	WFS1
blue	0.513296	0.000224594	0.408398	0.00437373	Colon_Resistant	O95865;A0A140T971;Q5SSV3;Q5SRR8;H0Y7N1	DDAH2
salmon	0.645056	9.85879e-07	0.627747	2.32522e-06	Colon_Resistant	O96005	CLPTM1
brown	0.503922	0.000304828	0.539886	8.98225e-05	Colon_Resistant	P00488	F13A1
black	0.598759	8.75314e-06	0.450909	0.00146856	Colon_Resistant	P09486;F5GY03;E5RK62	SPARC
grey	0.402943	0.00498217	0.403027	0.00497226	Colon_Resistant	P12235;V9GYG0	SLC25A4
yellow	0.443832	0.00177846	0.564795	3.53992e-05	Colon_Resistant	P12236	SLC25A6
grey	0.445241	0.00171249	0.408346	0.00437924	Colon_Resistant	P13667	PDIA4
greenyellow	0.463295	0.00103996	0.413054	0.00390697	Colon_Resistant	P13928;A0A087WTN9;A0A075B765	ANXA8
black	0.722541	9.81202e-09	0.427075	0.00275442	Colon_Resistant	P14384;F8W111	CPM
greenyellow	0.555865	4.98524e-05	0.407068	0.00451575	Colon_Resistant	P16144	ITGB4
blue	0.453495	0.00136792	0.514232	0.00021774	Colon_Resistant	P16615;H7C5W9	ATP2A2
magenta	0.471233	0.00082792	0.60964	5.40432e-06	Colon_Resistant	P19338;H7BY16	NCL
blue	0.60578	6.42568e-06	0.462003	0.00107874	Colon_Resistant	P23634	ATP2B4
green	0.636063	1.54993e-06	0.475218	0.00073683	Colon_Resistant	P26232	CTNNA2
greenyellow	0.44626	0.00166616	0.471693	0.00081692	Colon_Resistant	P27695;G3V3M6;G3V5Q1;G3V3C7;A0A0C4DGK8;H7C4A8;G3V5M0;G3V359	APEX1
salmon	0.752041	1.10438e-09	0.462725	0.00105692	Colon_Resistant	P30273;A6NCQ8	FCER1G
blue	0.411568	0.0040509	0.585544	1.53597e-05	Colon_Resistant	P35606	COPB2
green	0.521724	0.000169356	0.495381	0.000399612	Colon_Resistant	P42025	ACTR1B
blue	0.570044	2.88122e-05	0.513466	0.000223338	Colon_Resistant	P43034	PAFAH1B1
brown	0.509029	0.000258382	0.499822	0.000347445	Colon_Resistant	P51572;A0A2R8Y5M6;C9JSP1;C9JQ75;C9J0M4;C9JMD7	BCAP31
magenta	0.587128	1.43772e-05	0.406033	0.004629	Colon_Resistant	P51888	PRELP
brown	0.576638	2.21332e-05	0.520364	0.000177338	Colon_Resistant	P53384	NUBP1
yellow	0.409189	0.00429117	0.583204	1.69247e-05	Colon_Resistant	P53621;A0A3B3IT15;A0A3B3IS84;A0A3B3ISC6;A0A3B3IU89	COPA
green	0.452509	0.00140552	0.400606	0.00526462	Colon_Resistant	P55084;F5GZQ3;B5MD38	HADHB
red	0.512221	0.000232708	0.420805	0.00322629	Colon_Resistant	P61586;C9JNR4;C9JX21	RHOA
yellow	0.470506	0.000845575	0.644745	1.00169e-06	Colon_Resistant	P68104;Q5VTE0;A0A087WVQ9;A0A087WV01	EEF1A1;EEF1A1P5
brown	0.561103	4.0831e-05	0.470231	0.000852365	Colon_Resistant	Q02750	MAP2K1
salmon	0.658623	4.84196e-07	0.635534	1.59097e-06	Colon_Resistant	Q12792;F8VS81	TWF1
magenta	0.53694	9.98015e-05	0.515	0.00021226	Colon_Resistant	Q12904	AIMP1
black	0.730273	5.68926e-09	0.592157	1.16286e-05	Colon_Resistant	Q13326	SGCG
blue	0.508123	0.00026612	0.572709	2.59172e-05	Colon_Resistant	Q13423;E9PCX7	NNT
yellow	0.631497	1.93939e-06	0.40093	0.00522468	Colon_Resistant	Q14258;A0A3B3IUA7	TRIM25
blue	0.496492	0.000385946	0.457501	0.00122411	Colon_Resistant	Q14678	KANK1
turquoise	0.454185	0.00134211	0.438403	0.00205419	Colon_Resistant	Q16778;P33778;P23527;P06899	HIST2H2BE;HIST1H2BB;HIST1H2BO;HIST1H2BJ
brown	0.409154	0.00429481	0.464343	0.00100944	Colon_Resistant	Q16851;A0A087WYS1;E7EUC7	UGP2
blue	0.499469	0.000351357	0.490792	0.000460861	Colon_Resistant	Q16853	AOC3
blue	0.427307	0.0027382	0.566039	3.37241e-05	Colon_Resistant	Q4KMQ2	ANO6
salmon	0.486462	0.000526252	0.463212	0.00104241	Colon_Resistant	Q5JXI8;Q13642;Q5JXH8;Q5JXH7;Q5JXI3;A0A0D9SFZ9;A0A0D9SFI6;A0A0D9SFB0;Q5JXH9;Q5JXI2;A0A0D9SGB2;Q5JXI0;A0A0D9SG53	FHL1
blue	0.552227	5.71546e-05	0.471809	0.000814148	Colon_Resistant	Q5T8U5;O15260;B7Z1G8	SURF4
greenyellow	0.487537	0.000509284	0.450221	0.0014964	Colon_Resistant	Q6ZN40	TPM1
red	0.406511	0.00457641	0.464126	0.0010157	Colon_Resistant	Q7L1Q6;C9IZ80	BZW1
turquoise	0.464408	0.00100757	0.545561	7.3123e-05	Colon_Resistant	Q86UE4;E5RJU9	MTDH
blue	0.445423	0.00170413	0.500533	0.000339694	Colon_Resistant	Q8IWA5	SLC44A2
salmon	0.546057	7.18093e-05	0.425293	0.00288195	Colon_Resistant	Q8IYI6	EXOC8
turquoise	0.640668	1.23166e-06	0.617353	3.79779e-06	Colon_Resistant	Q8N138;J3KTF9;J3QRM9	ORMDL3
blue	0.622096	3.04267e-06	0.426311	0.0028085	Colon_Resistant	Q96AC1	FERMT2
tan	0.480883	0.000622798	0.404236	0.00483163	Colon_Resistant	Q96DG6	CMBL
magenta	0.419923	0.00329807	0.43999	0.00196995	Colon_Resistant	Q96DV4	MRPL38
magenta	0.747379	1.5908e-09	0.534098	0.000110375	Colon_Resistant	Q96DZ1	ERLEC1
blue	0.513083	0.000226183	0.402384	0.00504856	Colon_Resistant	Q99808	SLC29A1
blue	0.567451	3.1911e-05	0.471413	0.000823591	Colon_Resistant	Q9BRQ8	AIFM2
brown	0.486375	0.000527652	0.620393	3.29621e-06	Colon_Resistant	Q9HB90;Q9NQL2	RRAGC;RRAGD
green	0.413435	0.00387074	0.421522	0.00316899	Colon_Resistant	Q9HCC0;D6RD67	MCCC2
blue	0.45194	0.00142764	0.406004	0.00463227	Colon_Resistant	Q9NNX6;M0QZG5;M0R0P0	CD209
blue	0.495115	0.000402952	0.42974	0.00257307	Colon_Resistant	Q9NQC3	RTN4
blue	0.538581	9.41262e-05	0.537434	9.80627e-05	Colon_Resistant	Q9NTJ5;E9PGZ4	SACM1L
blue	0.456804	0.00124813	0.587417	1.42047e-05	Colon_Resistant	Q9P035;H3BS72;H3BPZ1	HACD3
magenta	0.539616	9.07006e-05	0.432293	0.00240929	Colon_Resistant	Q9UH99	SUN2
yellow	0.539481	9.11393e-05	0.412011	0.00400751	Colon_Resistant	Q9ULV4;B4E3S0;H0YHL7	CORO1C
salmon	0.550298	6.14133e-05	0.510453	0.000246625	Colon_Resistant	Q9Y5Y7	LYVE1
salmon	0.444545	0.00174481	0.469903	0.000860504	Colon_Resistant	Q9Y617	PSAT1
yellow	0.593623	1.09237e-05	0.45482	0.00131878	Colon_Sensitive	A0A0C4DGH0;Q5ZPR3	CD276
brown	0.467374	0.00092562	0.463478	0.00103458	Colon_Sensitive	A0A2R8Y4T1;E9PGF5;Q9HBL0;E9PF55;A0A087WWW7;H0Y4U1	TNS1
brown	0.485653	0.000539373	0.581668	1.80307e-05	Colon_Sensitive	A0AVT1	UBA6
turquoise	0.467042	0.000934473	0.414438	0.00377693	Colon_Sensitive	A6NC48;Q10588;H0Y984	BST1
red	0.467528	0.000921519	0.451681	0.00143783	Colon_Sensitive	A6NIW2;Q5JSL3	DOCK11
greenyellow	0.605584	6.48198e-06	0.427413	0.00273084	Colon_Sensitive	A6NNI4;A0A2R8Y478;G8JLH6;P21926;A0A087WU13	CD9
brown	0.407585	0.00446013	0.453998	0.00134906	Colon_Sensitive	B1ALY0;C9JA33;Q8IXS6;C9JZH4	PALM2-AKAP2;PALM2
red	0.541573	8.4528e-05	0.507349	0.000272898	Colon_Sensitive	B4DKY1;P49589	CARS
purple	0.678509	1.59661e-07	0.482632	0.000590951	Colon_Sensitive	C9J2Y9;P30876;C9J4M6;A0A1W2PPT5	POLR2B
black	0.481375	0.000613683	0.497966	0.000368446	Colon_Sensitive	C9J5N1;Q9BTE6	PTGES3L-AARSD1;AARSD1
yellow	0.467942	0.000910611	0.748874	1.41638e-09	Colon_Sensitive	C9JEN3;C9IYT2;F8WDY4;C9IZ27;C9JW19;C9JWV9;B4DUD2;Q969X1	TMBIM1
turquoise	0.467398	0.000924975	0.47286	0.000789573	Colon_Sensitive	D6RGG3;Q99715;A0A087X0A8	COL12A1
red	0.438738	0.00203616	0.412796	0.00393162	Colon_Sensitive	E7EX73;E9PGM1;E7EUU4	EIF4G1
green	0.557586	4.67054e-05	0.409491	0.00426002	Colon_Sensitive	E9PDR0;P05166;C9JQS9;E7EX59;E7EUY3;E7ETT1;E7ETT4;E9PEC3;F8WBI9	PCCB
green	0.664568	3.50545e-07	0.591301	1.20593e-05	Colon_Sensitive	E9PF18;Q16836;A0A0A0MSE2;A0A0D9SFP2;A0A1W2PNM1;A0A1W2PQV5;A0A1W2PQ78	HADH
purple	0.588264	1.37087e-05	0.411847	0.00402359	Colon_Sensitive	E9PGT1;Q15631;H7C1D4	TSN
turquoise	0.440724	0.00193201	0.41712	0.0035357	Colon_Sensitive	F8WF48;Q99442;F8WCJ7	SEC62
green	0.414835	0.00374032	0.475579	0.000729042	Colon_Sensitive	G3V0I5;P49821;B4DE93	NDUFV1
yellow	0.457469	0.0012252	0.465038	0.000989641	Colon_Sensitive	H0YD13;P16070;H0Y2P0;H0YE40	CD44
green	0.530682	0.000124429	0.44452	0.00174597	Colon_Sensitive	ILMN_1651438	ZFPM1
green	0.674452	2.01588e-07	0.525327	0.000149764	Colon_Sensitive	ILMN_1651705	CAT
brown	0.476547	0.000708512	0.416387	0.00360022	Colon_Sensitive	ILMN_1651902	RASL11A
yellow	0.606754	6.1525e-06	0.498013	0.000367911	Colon_Sensitive	ILMN_1652082	ELF4
brown	0.695157	5.89348e-08	0.469216	0.000877776	Colon_Sensitive	ILMN_1652128	LMBRD1
turquoise	0.484349	0.000561107	0.514671	0.000214591	Colon_Sensitive	ILMN_1652185	IL4R
green	0.666521	3.14773e-07	0.506799	0.000277815	Colon_Sensitive	ILMN_1652357	PDHX
yellow	0.853592	2.47648e-14	0.414366	0.00378361	Colon_Sensitive	ILMN_1652631	GLIPR2
green	0.808838	6.07215e-12	0.522153	0.000166906	Colon_Sensitive	ILMN_1652677	FAM89A
brown	0.781229	9.23432e-11	0.532137	0.000118254	Colon_Sensitive	ILMN_1653133	SH3D19
brown	0.611964	4.86423e-06	0.430583	0.00251798	Colon_Sensitive	ILMN_1653143	ECD
brown	0.525913	0.000146776	0.414371	0.0037831	Colon_Sensitive	ILMN_1654414	ACSL3
brown	0.682469	1.26701e-07	0.410904	0.00411675	Colon_Sensitive	ILMN_1654473	ZP1
green	0.653959	6.20771e-07	0.439842	0.00197765	Colon_Sensitive	ILMN_1654861	ACO2
red	0.649287	7.92826e-07	0.439787	0.00198052	Colon_Sensitive	ILMN_1655433	BCKDHB
brown	0.834459	3.17595e-13	0.50495	0.000294917	Colon_Sensitive	ILMN_1655469	TSPAN3
brown	0.51065	0.000245041	0.541904	8.3523e-05	Colon_Sensitive	ILMN_1655521	DMRTA1
brown	0.593468	1.09962e-05	0.587307	1.427e-05	Colon_Sensitive	ILMN_1655702	ABHD5
brown	0.553949	5.35844e-05	0.403428	0.00492522	Colon_Sensitive	ILMN_1655796	2020-03-03
brown	0.521996	0.0001678	0.5168	0.000199903	Colon_Sensitive	ILMN_1656415	CDKN2C
green	0.418899	0.00338322	0.484017	0.000566783	Colon_Sensitive	ILMN_1656487	FGA
brown	0.81089	4.87433e-12	0.482285	0.000597145	Colon_Sensitive	ILMN_1656574	PCGF6
green	0.566078	3.36733e-05	0.488731	0.000491007	Colon_Sensitive	ILMN_1656951	APCDD1
brown	0.526575	0.00014347	0.480912	0.000622266	Colon_Sensitive	ILMN_1656977	HIBCH
brown	0.554093	5.32955e-05	0.429843	0.00256631	Colon_Sensitive	ILMN_1657149	VXN
brown	0.845592	7.50354e-14	0.622412	2.9977e-06	Colon_Sensitive	ILMN_1657643	KCNIP2
green	0.834641	3.10461e-13	0.601032	7.92601e-06	Colon_Sensitive	ILMN_1657746	BPHL
purple	0.901287	5.86072e-18	0.464095	0.00101659	Colon_Sensitive	ILMN_1657797	FIBP
green	0.757059	7.38955e-10	0.539823	9.00283e-05	Colon_Sensitive	ILMN_1658759	PEX19
brown	0.729531	5.99939e-09	0.432351	0.00240571	Colon_Sensitive	ILMN_1658992	DPM1
purple	0.528356	0.000134909	0.536089	0.000102866	Colon_Sensitive	ILMN_1659206	RARA
green	0.577186	2.16479e-05	0.414243	0.00379501	Colon_Sensitive	ILMN_1659215	CYP4B1
yellow	0.639879	1.28146e-06	0.420021	0.0032901	Colon_Sensitive	ILMN_1659544	STX3
brown	0.566599	3.29945e-05	0.422503	0.00309201	Colon_Sensitive	ILMN_1659553	ANAPC1
green	0.742084	2.38523e-09	0.421172	0.0031969	Colon_Sensitive	ILMN_1659885	ACSS3
yellow	0.548835	6.48314e-05	0.553681	5.41262e-05	Colon_Sensitive	ILMN_1659936	PPP1R15A
black	0.804727	9.3558e-12	0.446537	0.00165372	Colon_Sensitive	ILMN_1659937	ZBTB24
brown	0.517292	0.000196641	0.402157	0.00507571	Colon_Sensitive	ILMN_1660440	ABHD17B
brown	0.756589	7.67589e-10	0.491957	0.000444558	Colon_Sensitive	ILMN_1660602	C1orf43
yellow	0.556113	4.93881e-05	0.45247	0.00140704	Colon_Sensitive	ILMN_1660629	NBEAL2
red	0.588347	1.3661e-05	0.451746	0.00143528	Colon_Sensitive	ILMN_1660635	LACTB2
yellow	0.753084	1.01673e-09	0.505431	0.000290375	Colon_Sensitive	ILMN_1660691	RAB31
brown	0.752525	1.06285e-09	0.558519	4.50757e-05	Colon_Sensitive	ILMN_1660787	SUCLA2
green	0.792216	3.28332e-11	0.472901	0.000788639	Colon_Sensitive	ILMN_1660847	PFKFB3
brown	0.654538	6.02049e-07	0.545059	7.44782e-05	Colon_Sensitive	ILMN_1660890	ACADL
brown	0.609001	5.56247e-06	0.505224	0.000292325	Colon_Sensitive	ILMN_1661000	RPS6KC1
purple	0.696522	5.41531e-08	0.441603	0.00188741	Colon_Sensitive	ILMN_1661554	DIAPH1
yellow	0.613321	4.57233e-06	0.531518	0.000120846	Colon_Sensitive	ILMN_1661755	NIBAN2
brown	0.84526	7.84657e-14	0.451549	0.00144305	Colon_Sensitive	ILMN_1661799	HIGD1A
green	0.857823	1.34137e-14	0.474535	0.000751771	Colon_Sensitive	ILMN_1662174	ORMDL3
brown	0.808843	6.06862e-12	0.558615	4.49114e-05	Colon_Sensitive	ILMN_1662306	RABL3
brown	0.559565	4.33112e-05	0.47006	0.000856598	Colon_Sensitive	ILMN_1663092	CITED2
brown	0.765609	3.64251e-10	0.46524	0.000983948	Colon_Sensitive	ILMN_1663220	MRPL22
green	0.687118	9.61444e-08	0.440128	0.00196273	Colon_Sensitive	ILMN_1663512	COX5B
green	0.815884	2.82347e-12	0.496091	0.000390832	Colon_Sensitive	ILMN_1663640	MAOA
blue	0.527658	0.000138209	0.423986	0.00297874	Colon_Sensitive	ILMN_1664330	CEACAM1
brown	0.802368	1.19353e-11	0.414536	0.00376785	Colon_Sensitive	ILMN_1664367	COQ6
blue	0.763284	4.42791e-10	0.407912	0.00442515	Colon_Sensitive	ILMN_1664369	DHTKD1
green	0.737017	3.48284e-09	0.651366	7.11417e-07	Colon_Sensitive	ILMN_1664577	DLD
green	0.866146	3.78242e-15	0.515067	0.000211786	Colon_Sensitive	ILMN_1664622	EFR3B
purple	0.428931	0.00262702	0.412738	0.00393717	Colon_Sensitive	ILMN_1664736	TEX49
green	0.783692	7.36186e-11	0.423282	0.00303206	Colon_Sensitive	ILMN_1664931	GTF2E2
greenyellow	0.632589	1.83879e-06	0.494393	0.000412143	Colon_Sensitive	ILMN_1665095	NSMF
green	0.629564	2.13013e-06	0.531957	0.000119004	Colon_Sensitive	ILMN_1665123	NMNAT3
green	0.663377	3.74197e-07	0.522672	0.000163987	Colon_Sensitive	ILMN_1665132	CD36
brown	0.80896	5.99359e-12	0.460113	0.00113778	Colon_Sensitive	ILMN_1665235	CRTAP
blue	0.747162	1.61772e-09	0.493439	0.000424579	Colon_Sensitive	ILMN_1665300	TRMT1L
green	0.696541	5.40864e-08	0.48482	0.000553172	Colon_Sensitive	ILMN_1665554	BRF2
green	0.754978	8.73973e-10	0.468116	0.000906073	Colon_Sensitive	ILMN_1665562	PLIN1
green	0.741785	2.43977e-09	0.579872	1.94077e-05	Colon_Sensitive	ILMN_1665775	2020-03-02
blue	0.841257	1.33335e-13	0.43127	0.0024738	Colon_Sensitive	ILMN_1666096	ACSL3
green	0.45193	0.00142806	0.413285	0.00388502	Colon_Sensitive	ILMN_1666372	ATP5PD
brown	0.600574	8.08671e-06	0.430801	0.00250385	Colon_Sensitive	ILMN_1666482	SP2
green	0.636536	1.51401e-06	0.410035	0.00420436	Colon_Sensitive	ILMN_1666933	ASH2L
yellow	0.556495	4.86788e-05	0.469551	0.000869316	Colon_Sensitive	ILMN_1667081	CCND2
green	0.833537	3.5619e-13	0.49021	0.000469203	Colon_Sensitive	ILMN_1667711	PLAAT3
blue	0.759179	6.21774e-10	0.411808	0.00402742	Colon_Sensitive	ILMN_1668446	ABCA9
green	0.758995	6.31164e-10	0.535352	0.00010559	Colon_Sensitive	ILMN_1668510	GLYAT
brown	0.597042	9.43007e-06	0.437592	0.00209848	Colon_Sensitive	ILMN_1668592	STON1
yellow	0.510717	0.000244498	0.401586	0.00514457	Colon_Sensitive	ILMN_1669015	XPNPEP1
purple	0.672903	2.20158e-07	0.51344	0.000223525	Colon_Sensitive	ILMN_1669323	BACE2
greenyellow	0.600572	8.0873e-06	0.509722	0.000252595	Colon_Sensitive	ILMN_1669377	AP4B1
brown	0.49334	0.000425887	0.447171	0.00162565	Colon_Sensitive	ILMN_1669553	UBE2E3
greenyellow	0.739937	2.8033e-09	0.401352	0.00517304	Colon_Sensitive	ILMN_1669599	DENND4C
brown	0.70401	3.37471e-08	0.516549	0.000201584	Colon_Sensitive	ILMN_1669631	GLRB
greenyellow	0.576421	2.23284e-05	0.445129	0.00171765	Colon_Sensitive	ILMN_1670377	ZNF20
green	0.734922	4.06286e-09	0.473029	0.000785679	Colon_Sensitive	ILMN_1670532	GMCL1
tan	0.821683	1.46679e-12	0.445974	0.00167902	Colon_Sensitive	ILMN_1670672	TMEM37
greenyellow	0.820139	1.7502e-12	0.446246	0.00166677	Colon_Sensitive	ILMN_1670796	EXOSC10
greenyellow	0.477574	0.00068731	0.430727	0.00250861	Colon_Sensitive	ILMN_1670920	FBXL18
salmon	0.519848	0.000180453	0.461062	0.00110778	Colon_Sensitive	ILMN_1670926	CHST15
brown	0.422331	0.00310538	0.475516	0.000730392	Colon_Sensitive	ILMN_1670970	PPP3CA
brown	0.642545	1.12031e-06	0.436916	0.00213605	Colon_Sensitive	ILMN_1671452	MRPL44
brown	0.819904	1.79762e-12	0.401929	0.00510314	Colon_Sensitive	ILMN_1671693	TPGS2
brown	0.788104	4.86925e-11	0.480759	0.000625116	Colon_Sensitive	ILMN_1672006	SSB
brown	0.778018	1.23543e-10	0.546216	7.13905e-05	Colon_Sensitive	ILMN_1672024	ISCA1
green	0.730127	5.74898e-09	0.572628	2.6001e-05	Colon_Sensitive	ILMN_1672057	AQP7
greenyellow	0.475279	0.000735518	0.501149	0.000333101	Colon_Sensitive	ILMN_1672121	CCDC184
turquoise	0.491279	0.000453977	0.417149	0.00353312	Colon_Sensitive	ILMN_1672611	CDH11
brown	0.629853	2.10062e-06	0.453401	0.00137147	Colon_Sensitive	ILMN_1672717	TMEM254
brown	0.919056	8.15577e-20	0.475961	0.000720885	Colon_Sensitive	ILMN_1672741	ITSN1
brown	0.648104	8.42932e-07	0.437722	0.00209132	Colon_Sensitive	ILMN_1672884	MTFMT
green	0.820884	1.60749e-12	0.515003	0.000212238	Colon_Sensitive	ILMN_1673518	BRWD1
green	0.876828	6.54391e-16	0.536784	0.000100357	Colon_Sensitive	ILMN_1673950	STBD1
brown	0.593468	1.09962e-05	0.529154	0.000131225	Colon_Sensitive	ILMN_1674032	ABCD3
brown	0.754633	8.98471e-10	0.504371	0.000300464	Colon_Sensitive	ILMN_1674151	MYZAP
green	0.590708	1.23662e-05	0.508463	0.000263189	Colon_Sensitive	ILMN_1674349	PLAAT5
blue	0.469963	0.000858998	0.477059	0.000697882	Colon_Sensitive	ILMN_1674367	SPRR2F
green	0.836333	2.51001e-13	0.633175	1.7868e-06	Colon_Sensitive	ILMN_1674941	ANO6
blue	0.610608	5.17311e-06	0.450126	0.0015003	Colon_Sensitive	ILMN_1675325	ENPEP
brown	0.686617	9.90726e-08	0.439721	0.00198401	Colon_Sensitive	ILMN_1676265	LEPR
greenyellow	0.526258	0.000145048	0.408734	0.00433852	Colon_Sensitive	ILMN_1676449	SLIT2
brown	0.847115	6.1054e-14	0.459074	0.00117146	Colon_Sensitive	ILMN_1676523	CCDC91
brown	0.733095	4.64164e-09	0.50275	0.000316501	Colon_Sensitive	ILMN_1677038	CPED1
brown	0.826514	8.34589e-13	0.426019	0.0028294	Colon_Sensitive	ILMN_1677098	YPEL2
brown	0.622487	2.98713e-06	0.408847	0.00432673	Colon_Sensitive	ILMN_1677138	POLR2J
green	0.654184	6.13444e-07	0.529575	0.00012932	Colon_Sensitive	ILMN_1677292	C5orf30
green	0.708323	2.55297e-08	0.551214	5.93551e-05	Colon_Sensitive	ILMN_1677384	PTGER3
brown	0.565112	3.49656e-05	0.493194	0.000427828	Colon_Sensitive	ILMN_1677396	NDFIP2
green	0.634519	1.67261e-06	0.447374	0.00161675	Colon_Sensitive	ILMN_1677483	EXOSC1
green	0.597888	9.09052e-06	0.629873	2.09851e-06	Colon_Sensitive	ILMN_1677607	SC5D
brown	0.765176	3.77806e-10	0.432008	0.00242712	Colon_Sensitive	ILMN_1677887	PMS2
yellow	0.760285	5.67793e-10	0.433436	0.00233904	Colon_Sensitive	ILMN_1678143	ARHGDIB
green	0.572423	2.62141e-05	0.404987	0.00474606	Colon_Sensitive	ILMN_1678612	ANXA6
brown	0.552122	5.73788e-05	0.414493	0.00377181	Colon_Sensitive	ILMN_1678671	KLHL24
brown	0.689022	8.57447e-08	0.438089	0.00207126	Colon_Sensitive	ILMN_1678961	FRMD4A
brown	0.795665	2.34306e-11	0.520715	0.000175244	Colon_Sensitive	ILMN_1679188	DMAC2L
brown	0.619446	3.44541e-06	0.452164	0.00141889	Colon_Sensitive	ILMN_1679796	TOMM20
brown	0.64535	9.71164e-07	0.446757	0.00164393	Colon_Sensitive	ILMN_1679901	PPARG
yellow	0.420787	0.00322775	0.405823	0.00465236	Colon_Sensitive	ILMN_1679979	PLK3
brown	0.752594	1.0571e-09	0.586246	1.49173e-05	Colon_Sensitive	ILMN_1680246	MAT2B
brown	0.619996	3.35801e-06	0.539762	9.02263e-05	Colon_Sensitive	ILMN_1680348	NBPF3
brown	0.787026	5.39155e-11	0.520541	0.000176282	Colon_Sensitive	ILMN_1680659	JHY
yellow	0.482732	0.00058918	0.400036	0.00533562	Colon_Sensitive	ILMN_1681016	LAT
tan	0.896865	1.49767e-17	0.500602	0.00033895	Colon_Sensitive	ILMN_1681081	AGPAT2
red	0.72345	9.21161e-09	0.403804	0.00488146	Colon_Sensitive	ILMN_1682935	LYPLAL1
brown	0.669255	2.70352e-07	0.409917	0.00421641	Colon_Sensitive	ILMN_1683023	PDGFC
turquoise	0.611318	5.00904e-06	0.422892	0.00306195	Colon_Sensitive	ILMN_1683664	SINHCAF
yellow	0.717162	1.4184e-08	0.41908	0.00336802	Colon_Sensitive	ILMN_1683859	SLC7A1
green	0.859971	9.75105e-15	0.417042	0.00354247	Colon_Sensitive	ILMN_1684158	GPT2
purple	0.60998	5.32218e-06	0.407764	0.00444098	Colon_Sensitive	ILMN_1684554	COL16A1
yellow	0.563112	3.77876e-05	0.449842	0.00151195	Colon_Sensitive	ILMN_1684929	TOPBP1
brown	0.694972	5.96154e-08	0.619505	3.43588e-06	Colon_Sensitive	ILMN_1685022	CAPN7
brown	0.6758	1.86643e-07	0.420081	0.00328515	Colon_Sensitive	ILMN_1685415	HBP1
blue	0.797711	1.91221e-11	0.404433	0.00480906	Colon_Sensitive	ILMN_1685722	EIF4A2
brown	0.636885	1.48801e-06	0.42576	0.00284801	Colon_Sensitive	ILMN_1685930	DNAJC24
yellow	0.751654	1.13875e-09	0.442789	0.00182874	Colon_Sensitive	ILMN_1686152	GGA2
brown	0.659345	4.65744e-07	0.718326	1.31062e-08	Colon_Sensitive	ILMN_1687201	APOL6
brown	0.609939	5.33189e-06	0.4439	0.00177521	Colon_Sensitive	ILMN_1687484	ZFX
brown	0.793798	2.81459e-11	0.514935	0.000212721	Colon_Sensitive	ILMN_1687612	PPARG
blue	0.443277	0.00180502	0.471876	0.000812563	Colon_Sensitive	ILMN_1688126	CFAP221
green	0.440281	0.00195479	0.4083	0.00438411	Colon_Sensitive	ILMN_1688242	C6
yellow	0.644067	1.03695e-06	0.407753	0.00444212	Colon_Sensitive	ILMN_1688373	LST1
black	0.616536	3.94412e-06	0.417648	0.00348981	Colon_Sensitive	ILMN_1688848	TMEM44
brown	0.739468	2.90335e-09	0.522303	0.000166058	Colon_Sensitive	ILMN_1688886	GPC5
brown	0.61125	5.02464e-06	0.450885	0.00146951	Colon_Sensitive	ILMN_1689306	TMC7
red	0.701588	3.93868e-08	0.423895	0.00298556	Colon_Sensitive	ILMN_1689336	HOXA10
brown	0.616973	3.86527e-06	0.452561	0.00140353	Colon_Sensitive	ILMN_1689578	TLR3
yellow	0.645661	9.55864e-07	0.40243	0.00504301	Colon_Sensitive	ILMN_1689655	HLA-DRA
green	0.650932	7.27724e-07	0.446727	0.00164529	Colon_Sensitive	ILMN_1689953	CD81
green	0.864435	4.9404e-15	0.445836	0.00168528	Colon_Sensitive	ILMN_1690040	TM7SF2
purple	0.763946	4.18957e-10	0.422987	0.00305459	Colon_Sensitive	ILMN_1690085	STK11IP
purple	0.815475	2.95445e-12	0.404736	0.00477449	Colon_Sensitive	ILMN_1690252	ALKBH2
brown	0.4232	0.00303831	0.453335	0.00137396	Colon_Sensitive	ILMN_1690365	USP41
green	0.745554	1.83116e-09	0.505894	0.000286068	Colon_Sensitive	ILMN_1690695	PEX11A
green	0.756697	7.60928e-10	0.406719	0.00455372	Colon_Sensitive	ILMN_1690708	SPTBN1
brown	0.700481	4.22492e-08	0.566266	3.34257e-05	Colon_Sensitive	ILMN_1690806	HACD2
blue	0.543396	7.91273e-05	0.407597	0.00445885	Colon_Sensitive	ILMN_1690839	PLPP7
yellow	0.56234	3.89317e-05	0.513411	0.00022374	Colon_Sensitive	ILMN_1691111	SPATA2L
green	0.490923	0.000459003	0.427835	0.00270162	Colon_Sensitive	ILMN_1691164	TGM7
green	0.665811	3.27367e-07	0.403206	0.00495119	Colon_Sensitive	ILMN_1691480	LONP2
brown	0.902296	4.70221e-18	0.569378	2.95808e-05	Colon_Sensitive	ILMN_1691570	METTL5
brown	0.82792	7.05964e-13	0.430118	0.0025482	Colon_Sensitive	ILMN_1692077	MXRA7
green	0.534394	0.000109229	0.500365	0.000341509	Colon_Sensitive	ILMN_1692123	ELOVL3
brown	0.851023	3.56038e-14	0.425046	0.00289998	Colon_Sensitive	ILMN_1693250	ACBD5
yellow	0.60455	6.78686e-06	0.408699	0.00434217	Colon_Sensitive	ILMN_1694213	PLEKHO1
red	0.843916	9.39059e-14	0.47787	0.000681315	Colon_Sensitive	ILMN_1694799	PIAS2
brown	0.834991	2.97166e-13	0.444216	0.00176024	Colon_Sensitive	ILMN_1694875	APPBP2
green	0.80389	1.02042e-11	0.48798	0.000502438	Colon_Sensitive	ILMN_1695290	FERMT2
yellow	0.758873	6.37531e-10	0.407376	0.00448256	Colon_Sensitive	ILMN_1695423	CD9
yellow	0.431548	0.00245615	0.46645	0.000950469	Colon_Sensitive	ILMN_1695962	SLC12A9
brown	0.60487	6.69116e-06	0.415629	0.00366805	Colon_Sensitive	ILMN_1696419	STOM
brown	0.55775	4.64153e-05	0.44778	0.00159908	Colon_Sensitive	ILMN_1696432	IDH1
purple	0.780777	9.62263e-11	0.435856	0.00219615	Colon_Sensitive	ILMN_1696601	VARS
blue	0.749233	1.3772e-09	0.522092	0.000167251	Colon_Sensitive	ILMN_1696974
blue	0.532945	0.000114946	0.44815	0.00158311	Colon_Sensitive	ILMN_1698259	TMEM100
purple	0.873913	1.07292e-15	0.475389	0.000733141	Colon_Sensitive	ILMN_1698478	SNAPC2
brown	0.774381	1.70801e-10	0.524739	0.000152814	Colon_Sensitive	ILMN_1699552	PDZRN3
blue	0.783725	7.33898e-11	0.408785	0.00433322	Colon_Sensitive	ILMN_1699644	2020-03-03
green	0.52574	0.000147654	0.441346	0.00190035	Colon_Sensitive	ILMN_1699695	TNFRSF21
brown	0.681699	1.32565e-07	0.495295	0.000400688	Colon_Sensitive	ILMN_1699859	GNPAT
brown	0.549123	6.41448e-05	0.439573	0.00199178	Colon_Sensitive	ILMN_1700202	TMEM135
green	0.631809	1.91009e-06	0.401836	0.00511431	Colon_Sensitive	ILMN_1700477	MRPL43
brown	0.552644	5.62707e-05	0.440589	0.00193894	Colon_Sensitive	ILMN_1700915	BMI1
green	0.611771	4.90715e-06	0.440177	0.00196018	Colon_Sensitive	ILMN_1701017	SAA2
green	0.676982	1.74378e-07	0.463469	0.00103485	Colon_Sensitive	ILMN_1701134	PTEN
brown	0.669619	2.64907e-07	0.505977	0.000285305	Colon_Sensitive	ILMN_1701293	COX7A2
green	0.824807	1.02059e-12	0.46098	0.00111034	Colon_Sensitive	ILMN_1701386	STRADB
brown	0.893195	3.16127e-17	0.514092	0.000218754	Colon_Sensitive	ILMN_1701507	EHHADH
green	0.72491	8.31889e-09	0.509864	0.00025143	Colon_Sensitive	ILMN_1701596	RPS20
yellow	0.831094	4.8108e-13	0.478067	0.000677328	Colon_Sensitive	ILMN_1701875	ZYX
tan	0.82809	6.9172e-13	0.417604	0.0034936	Colon_Sensitive	ILMN_1702633	RETSAT
green	0.843548	9.861e-14	0.418833	0.00338874	Colon_Sensitive	ILMN_1702858	ADHFE1
blue	0.419642	0.00332129	0.420022	0.00328998	Colon_Sensitive	ILMN_1703326	PTGDR2
green	0.701012	4.08523e-08	0.58922	1.31684e-05	Colon_Sensitive	ILMN_1703511	PDZRN3
purple	0.78072	9.67282e-11	0.487439	0.00051081	Colon_Sensitive	ILMN_1704286	FXYD5
green	0.576729	2.20521e-05	0.40775	0.00444243	Colon_Sensitive	ILMN_1704531	PTGR1
yellow	0.734384	4.22577e-09	0.404329	0.00482095	Colon_Sensitive	ILMN_1704985	CYP27A1
tan	0.642129	1.14415e-06	0.472372	0.000800901	Colon_Sensitive	ILMN_1705213	TMBIM1
yellow	0.872566	1.3429e-15	0.448777	0.00155642	Colon_Sensitive	ILMN_1705617	CFL1
green	0.685298	1.07182e-07	0.476915	0.00070086	Colon_Sensitive	ILMN_1705753	CMSS1
black	0.546719	7.00862e-05	0.454786	0.00132	Colon_Sensitive	ILMN_1706521	CSNK1G2
brown	0.702324	3.75857e-08	0.502331	0.000320771	Colon_Sensitive	ILMN_1707199	WDR20
brown	0.818442	2.12105e-12	0.436958	0.00213373	Colon_Sensitive	ILMN_1707592	RGN
yellow	0.499757	0.000348164	0.413591	0.00385606	Colon_Sensitive	ILMN_1708006	MICB
brown	0.700542	4.20861e-08	0.451285	0.00145353	Colon_Sensitive	ILMN_1708627	SRP9
brown	0.653299	6.42743e-07	0.426085	0.00282468	Colon_Sensitive	ILMN_1708954	GAR1
green	0.623354	2.86722e-06	0.467914	0.000911345	Colon_Sensitive	ILMN_1709042	RBM14-RBM4
turquoise	0.50252	0.000318842	0.44782	0.00159733	Colon_Sensitive	ILMN_1709307	GPSM1
brown	0.780214	1.01292e-10	0.593853	1.08168e-05	Colon_Sensitive	ILMN_1709613	IGF1
yellow	0.771099	2.27644e-10	0.420712	0.00323383	Colon_Sensitive	ILMN_1709683	RASSF2
brown	0.670112	2.57687e-07	0.434932	0.00224976	Colon_Sensitive	ILMN_1709728	SLC30A5
brown	0.565609	3.42953e-05	0.472715	0.000792919	Colon_Sensitive	ILMN_1709772	SNX5
purple	0.719613	1.20047e-08	0.420777	0.00322859	Colon_Sensitive	ILMN_1709814	NMRAL1
green	0.668537	2.81421e-07	0.447175	0.00162549	Colon_Sensitive	ILMN_1710075	FAM89A
turquoise	0.586136	1.49859e-05	0.445563	0.0016977	Colon_Sensitive	ILMN_1710495	PAPLN
yellow	0.449839	0.00151206	0.431988	0.00242835	Colon_Sensitive	ILMN_1710514	BCL3
yellow	0.481041	0.000619867	0.440373	0.00195005	Colon_Sensitive	ILMN_1710962	TMEM97
brown	0.596825	9.51897e-06	0.558378	4.53185e-05	Colon_Sensitive	ILMN_1711069	YPEL5
brown	0.764618	3.95985e-10	0.401192	0.00519254	Colon_Sensitive	ILMN_1711089	DNAJC21
green	0.607804	5.86979e-06	0.453884	0.0013533	Colon_Sensitive	ILMN_1711331	MAP1LC3C
green	0.591968	1.17221e-05	0.433639	0.00232672	Colon_Sensitive	ILMN_1711414	MRPS27
blue	0.82857	6.5303e-13	0.480329	0.000633205	Colon_Sensitive	ILMN_1711514	COCH
green	0.598336	8.91549e-06	0.495615	0.000396705	Colon_Sensitive	ILMN_1711650	ACSL4
brown	0.663591	3.69844e-07	0.498062	0.000367334	Colon_Sensitive	ILMN_1712298	ANKRD46
green	0.637889	1.41554e-06	0.446838	0.00164033	Colon_Sensitive	ILMN_1712577	FAM174A
green	0.797208	2.01043e-11	0.53635	0.000101916	Colon_Sensitive	ILMN_1712859	FAM89A
purple	0.784438	6.86914e-11	0.40993	0.004215	Colon_Sensitive	ILMN_1712887	SLC10A3
purple	0.697955	4.95214e-08	0.527424	0.00013933	Colon_Sensitive	ILMN_1712914	SEMA6B
greenyellow	0.571091	2.76412e-05	0.507481	0.000271732	Colon_Sensitive	ILMN_1713993	UBAC2
brown	0.813869	3.52625e-12	0.487394	0.000511514	Colon_Sensitive	ILMN_1714083	KLHL8
green	0.680095	1.45603e-07	0.439427	0.00199945	Colon_Sensitive	ILMN_1714167	CYB5A
green	0.824023	1.11859e-12	0.420811	0.00322585	Colon_Sensitive	ILMN_1714197	ACSS2
green	0.739352	2.92857e-09	0.418083	0.0034524	Colon_Sensitive	ILMN_1714228	SPTBN1
blue	0.707536	2.68741e-08	0.459198	0.00116739	Colon_Sensitive	ILMN_1714335	RDH10
green	0.883429	2.03621e-16	0.657849	5.04742e-07	Colon_Sensitive	ILMN_1714384	PCCA
turquoise	0.660508	4.37405e-07	0.437191	0.00212073	Colon_Sensitive	ILMN_1714433	MARCKSL1
purple	0.731126	5.35109e-09	0.413259	0.00388748	Colon_Sensitive	ILMN_1714438
tan	0.743148	2.20052e-09	0.493252	0.000427054	Colon_Sensitive	ILMN_1715543	ACOT1
brown	0.814604	3.25267e-12	0.506207	0.000283185	Colon_Sensitive	ILMN_1715931	ISCA1
black	0.6993	4.5515e-08	0.427439	0.00272901	Colon_Sensitive	ILMN_1716309	EGFL6
brown	0.685449	1.0622e-07	0.413252	0.00388811	Colon_Sensitive	ILMN_1716790	APBB2
brown	0.756113	7.97704e-10	0.489611	0.000477922	Colon_Sensitive	ILMN_1716797	CD302
brown	0.600638	8.06386e-06	0.477346	0.000691973	Colon_Sensitive	ILMN_1717366	MDFIC
green	0.750356	1.26128e-09	0.485994	0.000533813	Colon_Sensitive	ILMN_1717803	CDK5R2
purple	0.772052	2.09535e-10	0.421759	0.0031502	Colon_Sensitive	ILMN_1717809	RNF24
brown	0.875771	7.84064e-16	0.434313	0.00228631	Colon_Sensitive	ILMN_1717853	DMGDH
green	0.728131	6.62871e-09	0.447132	0.00162738	Colon_Sensitive	ILMN_1718132	ECHS1
green	0.769926	2.51974e-10	0.44941	0.00152986	Colon_Sensitive	ILMN_1718198	NPY5R
yellow	0.543472	7.89094e-05	0.443298	0.00180403	Colon_Sensitive	ILMN_1718558	PARP12
green	0.763639	4.2987e-10	0.505664	0.000288196	Colon_Sensitive	ILMN_1718565	CDKN1C
black	0.614228	4.38635e-06	0.463489	0.00103425	Colon_Sensitive	ILMN_1718610	ARHGAP17
green	0.790924	3.71953e-11	0.421017	0.00320929	Colon_Sensitive	ILMN_1718769	ITSN1
brown	0.586276	1.48982e-05	0.556317	4.90077e-05	Colon_Sensitive	ILMN_1718853	UQCRC2
green	0.8538	2.40379e-14	0.52673	0.000142705	Colon_Sensitive	ILMN_1718924	ETFA
brown	0.769437	2.62816e-10	0.516704	0.000200541	Colon_Sensitive	ILMN_1718961	BNIP3L
brown	0.711829	2.02742e-08	0.504239	0.000301745	Colon_Sensitive	ILMN_1719032	LSM3
greenyellow	0.78612	5.87114e-11	0.48031	0.000633563	Colon_Sensitive	ILMN_1719205	FBL
yellow	0.730716	5.51125e-09	0.426673	0.00278277	Colon_Sensitive	ILMN_1719316	TMED3
brown	0.738874	3.03468e-09	0.502679	0.000317219	Colon_Sensitive	ILMN_1719792	PHLDB2
green	0.88571	1.33812e-16	0.54548	7.334e-05	Colon_Sensitive	ILMN_1719906	HADH
green	0.696841	5.30857e-08	0.469347	0.000874459	Colon_Sensitive	ILMN_1720235	ADSSL1
greenyellow	0.669625	2.64823e-07	0.475724	0.000725945	Colon_Sensitive	ILMN_1720513	SETBP1
green	0.58632	1.48715e-05	0.428868	0.00263126	Colon_Sensitive	ILMN_1720799	TECR
greenyellow	0.500326	0.00034193	0.553225	5.50612e-05	Colon_Sensitive	ILMN_1721128	TOMM34
brown	0.501198	0.000332575	0.49441	0.000411922	Colon_Sensitive	ILMN_1722089	RNF217
green	0.510028	0.000250086	0.517171	0.000197437	Colon_Sensitive	ILMN_1722156	RWDD2A
green	0.519135	0.000184842	0.416384	0.00360047	Colon_Sensitive	ILMN_1722533	KATNAL1
brown	0.621206	3.17276e-06	0.428289	0.00267045	Colon_Sensitive	ILMN_1722642	REEP3
yellow	0.650269	7.53339e-07	0.461758	0.00108625	Colon_Sensitive	ILMN_1722648	SF3B4
yellow	0.629309	2.15655e-06	0.464055	0.00101776	Colon_Sensitive	ILMN_1723158	IFFO1
brown	0.76648	3.38364e-10	0.428762	0.00263837	Colon_Sensitive	ILMN_1723198	CDKN2B
green	0.780095	1.02396e-10	0.515268	0.000210375	Colon_Sensitive	ILMN_1723843	CSNK2A2
green	0.873075	1.23404e-15	0.526014	0.00014627	Colon_Sensitive	ILMN_1724658	BNIP3
brown	0.636907	1.48636e-06	0.408387	0.00437494	Colon_Sensitive	ILMN_1724734	UQCC1
blue	0.464651	0.00100061	0.533164	0.000114065	Colon_Sensitive	ILMN_1725791	HACD1
green	0.67904	1.54818e-07	0.441727	0.00188119	Colon_Sensitive	ILMN_1726239	TBCA
brown	0.721061	1.08685e-08	0.404541	0.00479671	Colon_Sensitive	ILMN_1726930	TRAPPC13
green	0.617522	3.76805e-06	0.459947	0.00114309	Colon_Sensitive	ILMN_1726981	VEGFB
green	0.762133	4.8733e-10	0.570819	2.79408e-05	Colon_Sensitive	ILMN_1727360	MAOB
turquoise	0.502881	0.000315173	0.40945	0.00426425	Colon_Sensitive	ILMN_1727458	HDAC1
blue	0.623405	2.86023e-06	0.478854	0.000661684	Colon_Sensitive	ILMN_1728011	NLGN4X
green	0.851715	3.23093e-14	0.510271	0.000248099	Colon_Sensitive	ILMN_1728083	EIF4EBP2
brown	0.744874	1.92927e-09	0.411916	0.0040168	Colon_Sensitive	ILMN_1728467	GHITM
brown	0.64806	8.44839e-07	0.446712	0.00164594	Colon_Sensitive	ILMN_1728514	BAG5
brown	0.710591	2.20016e-08	0.476962	0.000699871	Colon_Sensitive	ILMN_1728605	TTC3
brown	0.780352	1.00025e-10	0.517663	0.000194212	Colon_Sensitive	ILMN_1728975	SCO1
brown	0.743625	2.12215e-09	0.43705	0.00212857	Colon_Sensitive	ILMN_1729095	PDZD2
greenyellow	0.511995	0.000234445	0.430564	0.00251919	Colon_Sensitive	ILMN_1729123	PTPA
brown	0.713285	1.84053e-08	0.430415	0.00252885	Colon_Sensitive	ILMN_1729318	TOR1AIP1
brown	0.537162	9.90159e-05	0.483758	0.000571222	Colon_Sensitive	ILMN_1729650	PEX7
brown	0.610079	5.29825e-06	0.415807	0.00365204	Colon_Sensitive	ILMN_1730611	RTN4
green	0.698798	4.69718e-08	0.527387	0.000139506	Colon_Sensitive	ILMN_1730765	DUSP22
green	0.83734	2.20938e-13	0.474105	0.000761317	Colon_Sensitive	ILMN_1731064	COQ8A
brown	0.572417	2.62209e-05	0.566162	3.35627e-05	Colon_Sensitive	ILMN_1731349	HOXA13
yellow	0.468973	0.000883936	0.403346	0.00493486	Colon_Sensitive	ILMN_1731783	ATP1A1
brown	0.624457	2.72108e-06	0.478539	0.000667914	Colon_Sensitive	ILMN_1731966	LEPR
tan	0.881096	3.10037e-16	0.433932	0.00230909	Colon_Sensitive	ILMN_1732176	AGPAT2
brown	0.640141	1.26473e-06	0.445487	0.00170119	Colon_Sensitive	ILMN_1733680	AZI2
green	0.711118	2.12499e-08	0.546114	7.16583e-05	Colon_Sensitive	ILMN_1733690	AKAP7
green	0.704623	3.24451e-08	0.462661	0.00105883	Colon_Sensitive	ILMN_1733937	MMD
yellow	0.565352	3.46398e-05	0.5208	0.000174742	Colon_Sensitive	ILMN_1734288	DUSP18
tan	0.902055	4.95739e-18	0.407545	0.00446434	Colon_Sensitive	ILMN_1734353	GPX4
purple	0.744663	1.96066e-09	0.439767	0.00198158	Colon_Sensitive	ILMN_1734542	OVGP1
tan	0.813946	3.49682e-12	0.426607	0.00278742	Colon_Sensitive	ILMN_1734810	PJA1
yellow	0.436452	0.0021622	0.519054	0.000185351	Colon_Sensitive	ILMN_1734830	MTHFR
brown	0.76067	5.50082e-10	0.510568	0.000245699	Colon_Sensitive	ILMN_1734833	NBN
brown	0.782414	8.28352e-11	0.40202	0.00509214	Colon_Sensitive	ILMN_1734895	SFT2D1
brown	0.708117	2.58767e-08	0.440371	0.00195014	Colon_Sensitive	ILMN_1735220	CAV2
brown	0.72356	9.14161e-09	0.470669	0.000841584	Colon_Sensitive	ILMN_1735822	TTC30A
brown	0.568215	3.09675e-05	0.479689	0.000645414	Colon_Sensitive	ILMN_1736077	LIAS
brown	0.718178	1.32391e-08	0.491523	0.00045056	Colon_Sensitive	ILMN_1736103	ITPR2
brown	0.611348	5.0024e-06	0.424221	0.0029611	Colon_Sensitive	ILMN_1736510	FOXN2
green	0.539109	9.23641e-05	0.404604	0.00478955	Colon_Sensitive	ILMN_1736751	VPS26B
blue	0.645039	9.86761e-07	0.401769	0.00512238	Colon_Sensitive	ILMN_1737168	THTPA
brown	0.633477	1.76054e-06	0.430711	0.00250969	Colon_Sensitive	ILMN_1737343	FNIP1
brown	0.50463	0.000297969	0.498411	0.000363317	Colon_Sensitive	ILMN_1737462	OXR1
green	0.624696	2.69034e-06	0.540563	8.76631e-05	Colon_Sensitive	ILMN_1737574	TMLHE
brown	0.669753	2.6292e-07	0.430689	0.00251111	Colon_Sensitive	ILMN_1737586	EIF4H
green	0.724402	8.62002e-09	0.518495	0.000188865	Colon_Sensitive	ILMN_1737685
brown	0.523828	0.000157651	0.419003	0.0033745	Colon_Sensitive	ILMN_1737738	NDUFA12
yellow	0.450228	0.00149611	0.492691	0.000434554	Colon_Sensitive	ILMN_1738075	CMIP
brown	0.666767	3.10501e-07	0.538315	9.50241e-05	Colon_Sensitive	ILMN_1738132	HOXA11
brown	0.579731	1.95198e-05	0.412931	0.00391874	Colon_Sensitive	ILMN_1738272	DHX36
green	0.609416	5.45928e-06	0.440697	0.00193339	Colon_Sensitive	ILMN_1738494	AQP7
purple	0.53819	9.54502e-05	0.422573	0.00308653	Colon_Sensitive	ILMN_1739576	CYB5R2
brown	0.612573	4.73103e-06	0.44723	0.00162307	Colon_Sensitive	ILMN_1739719	ASPH
yellow	0.482321	0.000596502	0.410381	0.00416933	Colon_Sensitive	ILMN_1739749	B3GALT6
green	0.557312	4.7194e-05	0.469233	0.000877325	Colon_Sensitive	ILMN_1740024	NAALAD2
yellow	0.744053	2.05404e-09	0.502755	0.000316449	Colon_Sensitive	ILMN_1740185	TPMT
greenyellow	0.550547	6.08458e-05	0.435402	0.00222234	Colon_Sensitive	ILMN_1740466	TENT5A
blue	0.65153	7.05312e-07	0.570805	2.79561e-05	Colon_Sensitive	ILMN_1740717	ADH1C
green	0.652539	6.68961e-07	0.430556	0.00251967	Colon_Sensitive	ILMN_1741054	SLC5A6
green	0.795447	2.3939e-11	0.425701	0.00285232	Colon_Sensitive	ILMN_1741600	PFKFB1
yellow	0.794722	2.57112e-11	0.402799	0.00499923	Colon_Sensitive	ILMN_1741917	OSCAR
brown	0.620759	3.24005e-06	0.506524	0.000280299	Colon_Sensitive	ILMN_1741985	BBS10
green	0.811077	4.77722e-12	0.63337	1.76977e-06	Colon_Sensitive	ILMN_1742044	GNAI1
green	0.529581	0.000129294	0.433492	0.00233562	Colon_Sensitive	ILMN_1742054	RP1L1
green	0.698144	4.8939e-08	0.542346	8.22002e-05	Colon_Sensitive	ILMN_1742250	CCNH
green	0.737582	3.34045e-09	0.421873	0.00314122	Colon_Sensitive	ILMN_1742917	NXNL1
brown	0.659449	4.63156e-07	0.468575	0.000894153	Colon_Sensitive	ILMN_1743299	PEX2
green	0.701598	3.9361e-08	0.48601	0.00053355	Colon_Sensitive	ILMN_1743361	PTGER3
brown	0.805884	8.29264e-12	0.420746	0.00323105	Colon_Sensitive	ILMN_1743711	XPOT
brown	0.690864	7.66902e-08	0.499477	0.000351263	Colon_Sensitive	ILMN_1743784	SHMT1
green	0.697468	5.10514e-08	0.47348	0.000775389	Colon_Sensitive	ILMN_1744210
brown	0.684633	1.115e-07	0.497482	0.00037412	Colon_Sensitive	ILMN_1744693	FGF2
green	0.73319	4.60954e-09	0.496882	0.000381239	Colon_Sensitive	ILMN_1744949	RHOBTB3
blue	0.454031	0.00134782	0.415209	0.00370611	Colon_Sensitive	ILMN_1745075	RPLP0
greenyellow	0.746117	1.75357e-09	0.494767	0.000407357	Colon_Sensitive	ILMN_1745329	PRR14
brown	0.873582	1.13401e-15	0.421448	0.00317482	Colon_Sensitive	ILMN_1745813	KIF1BP
brown	0.864783	4.68045e-15	0.430088	0.00255017	Colon_Sensitive	ILMN_1746494	FNTA
green	0.777326	1.31457e-10	0.457996	0.00120732	Colon_Sensitive	ILMN_1746561	BCL2L2
[truncated: 10,495 more rows]
