# Supplementary figures and images for: Multiomics reveal unique signatures of human epiploic adipose tissue related to systemic insulin resistance
Source: HighWire-hosted journal article supplement (doi:10.1136/gutjnl-2021-324603), 2021-10-01

## A Epiploic: gene set enrichment between patient groups using KEGG

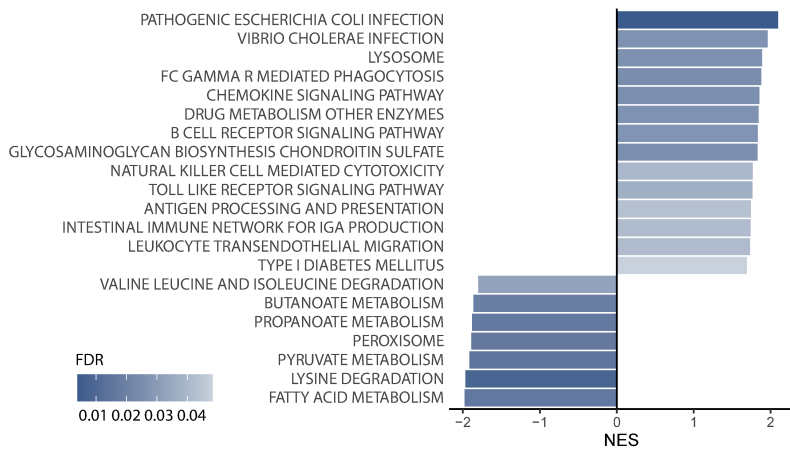

## B FACS comparison noT2D vs T2D

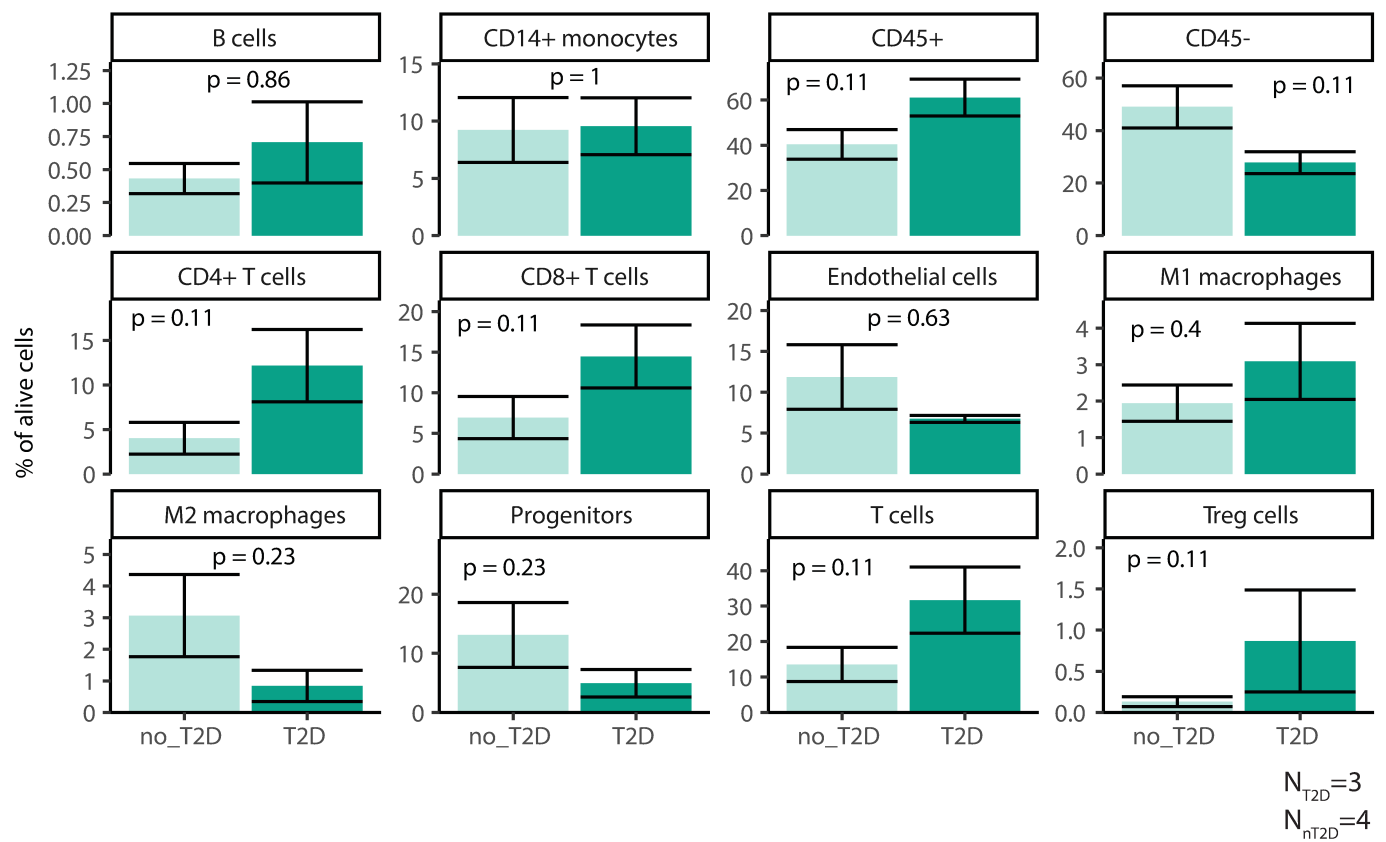

Supplement: gutjnl-2021-324603supp015_data_supplement.pdf [file gutjnl-2021-324603supp015_data_supplement.pdf]

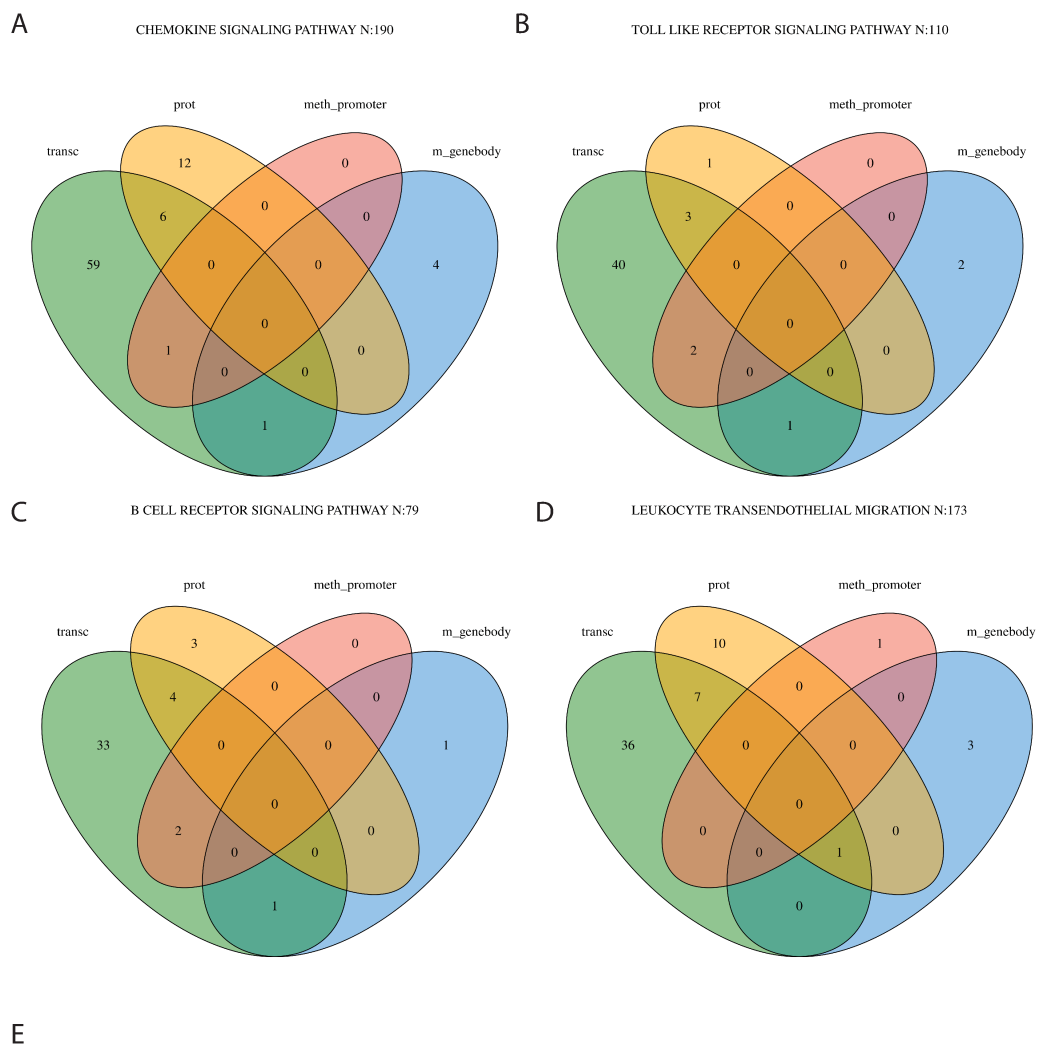

All Genes in Significant Pathways (N: 1100)

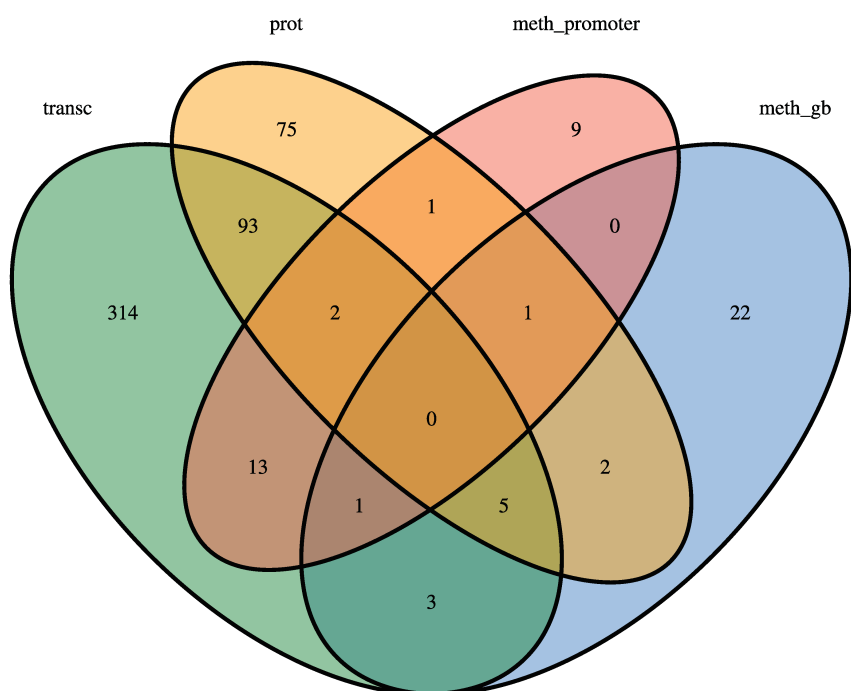

Supplement: gutjnl-2021-324603supp016_data_supplement.pdf [file gutjnl-2021-324603supp016_data_supplement.pdf]

## A Epiploic: gene set enrichment between patient groups using KEGG

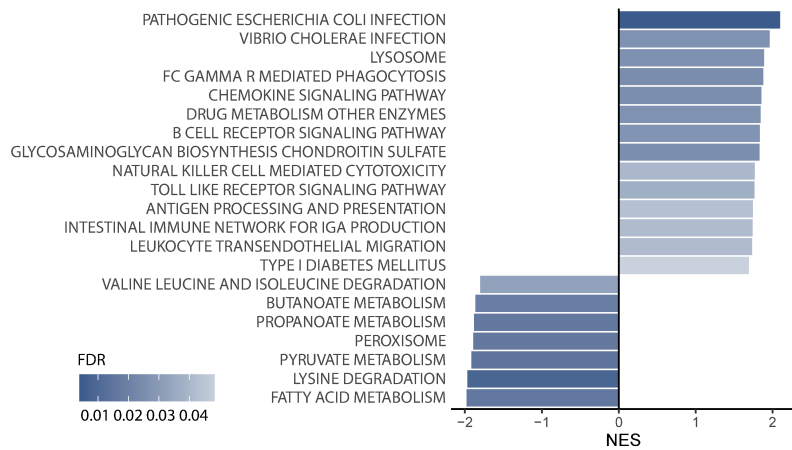

## B FACS comparison noT2D vs T2D

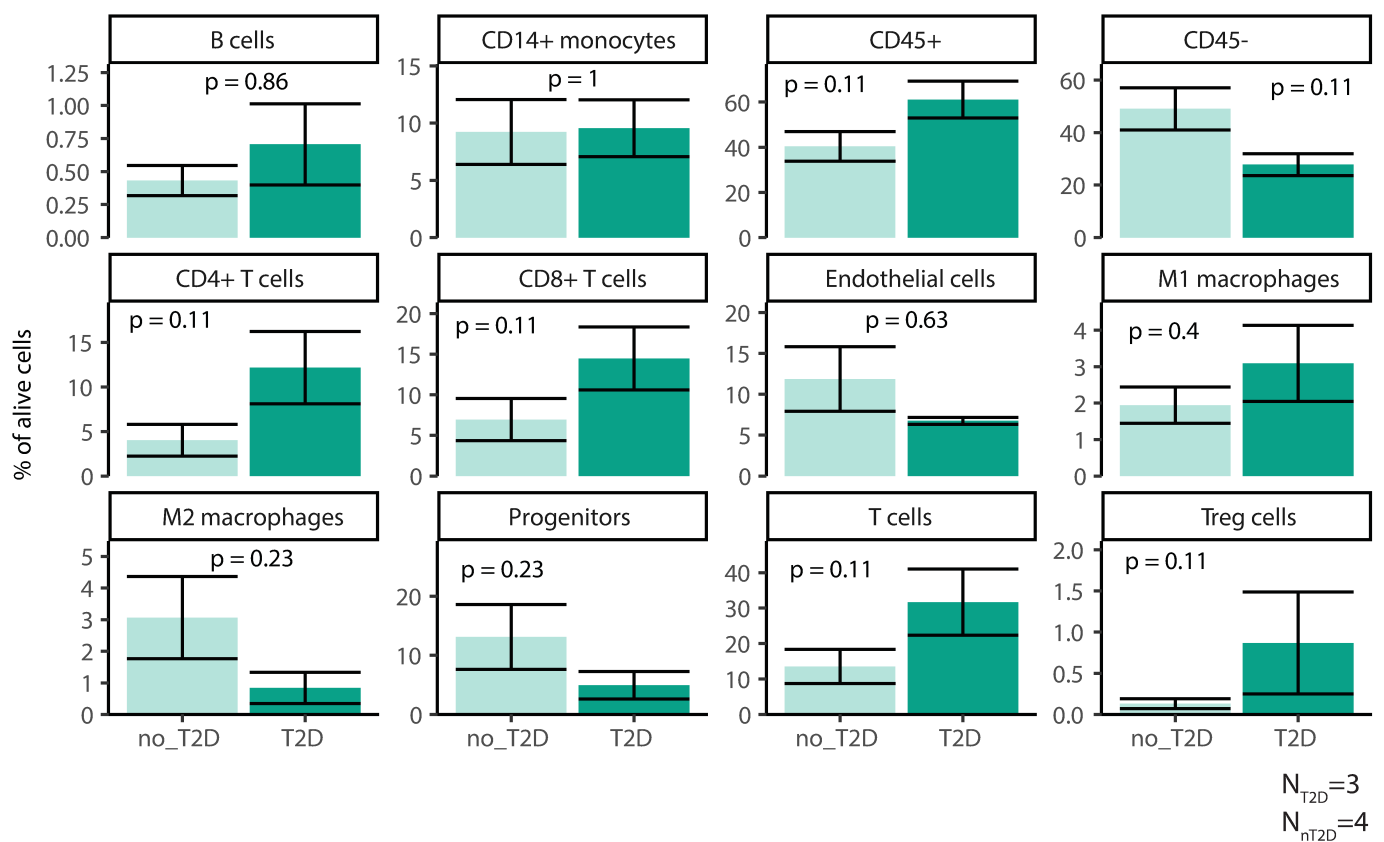

Supplement: gutjnl-2021-324603supp015_data_supplement.pdf [file gutjnl-2021-324603supp015_data_supplement.pdf]

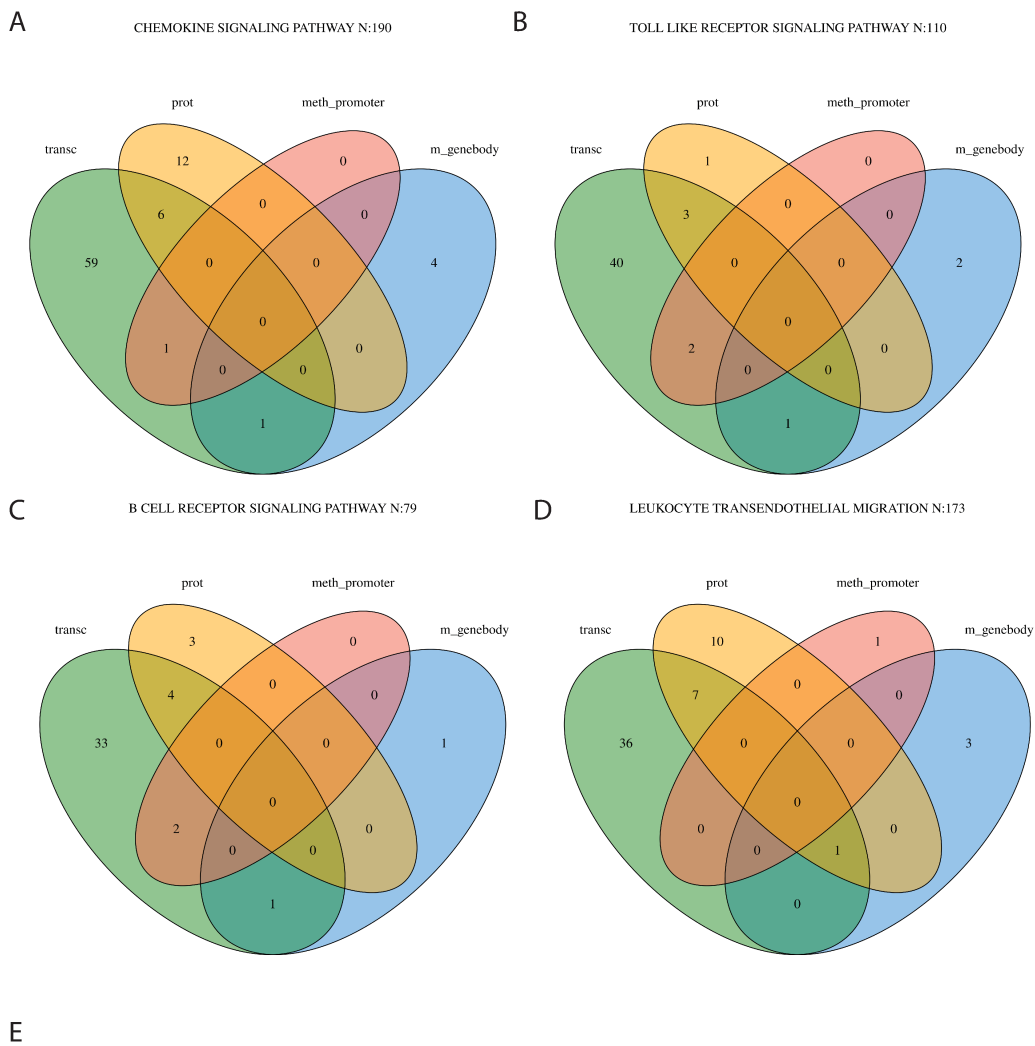

E

All Genes in Significant Pathways (N: 1100)

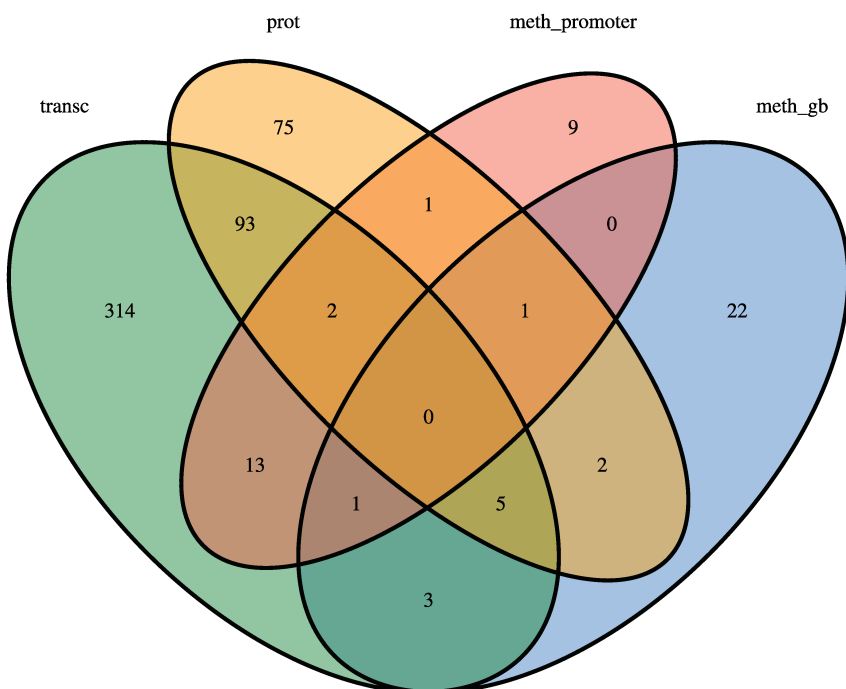

Supplement: gutjnl-2021-324603supp016_data_supplement.pdf [file gutjnl-2021-324603supp016_data_supplement.pdf]

## A Epiploic: gene set enrichment between patient groups using KEGG

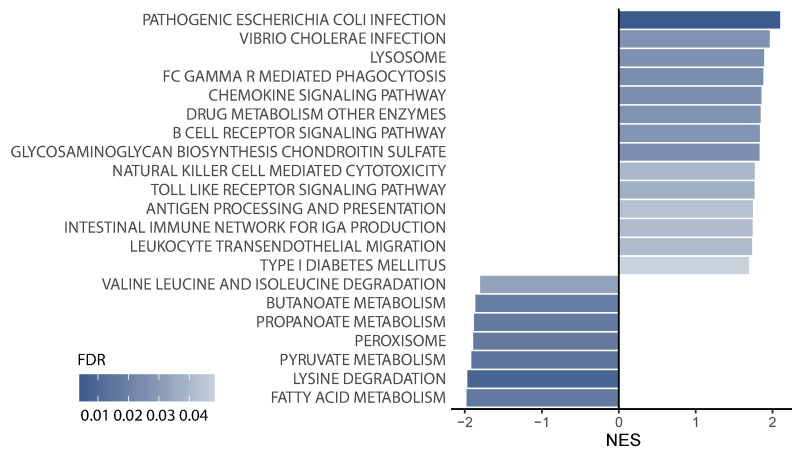

## B FACS comparison noT2D vs T2D

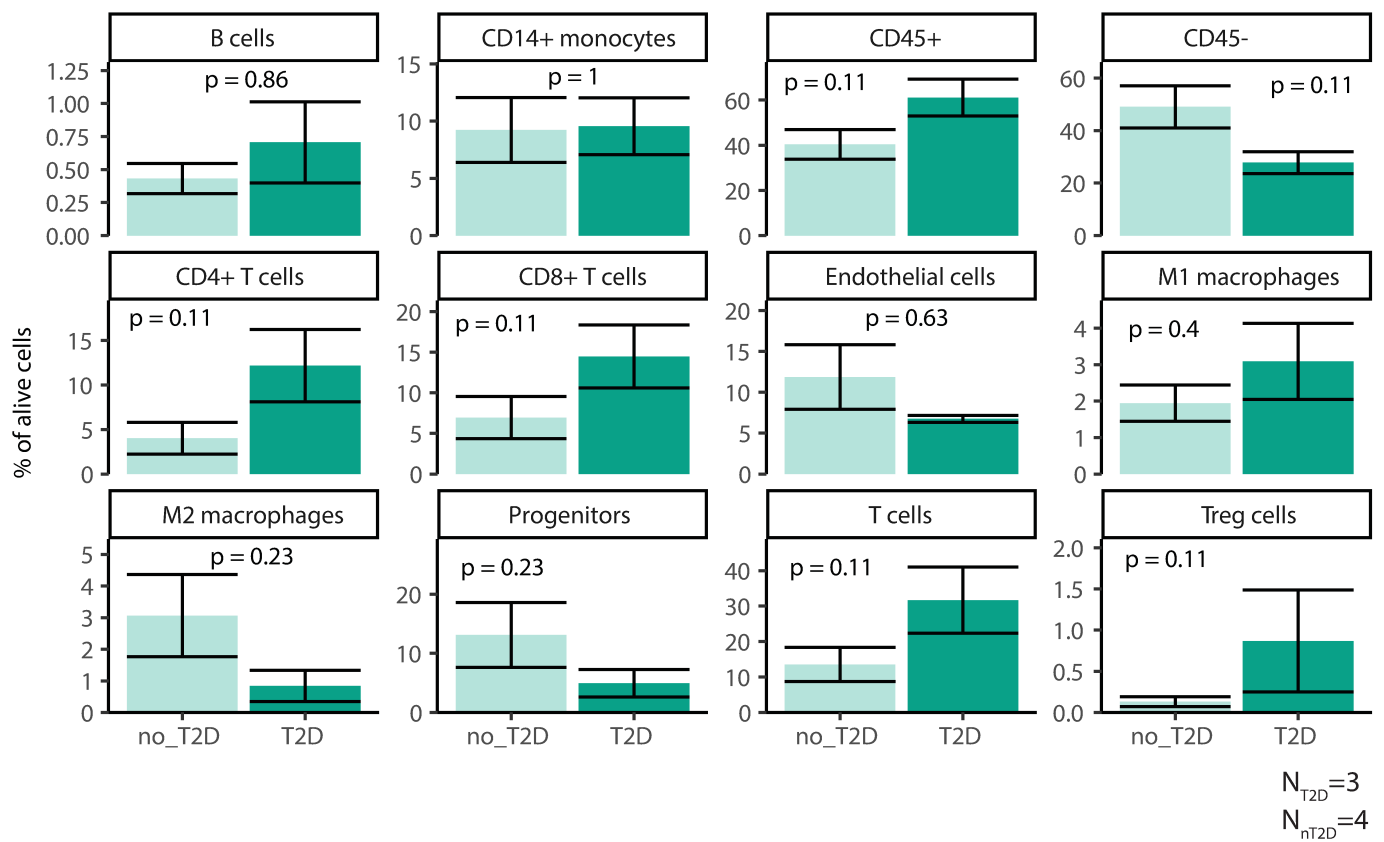

Supplement: gutjnl-2021-324603supp015_data_supplement.pdf [file gutjnl-2021-324603supp015_data_supplement.pdf]

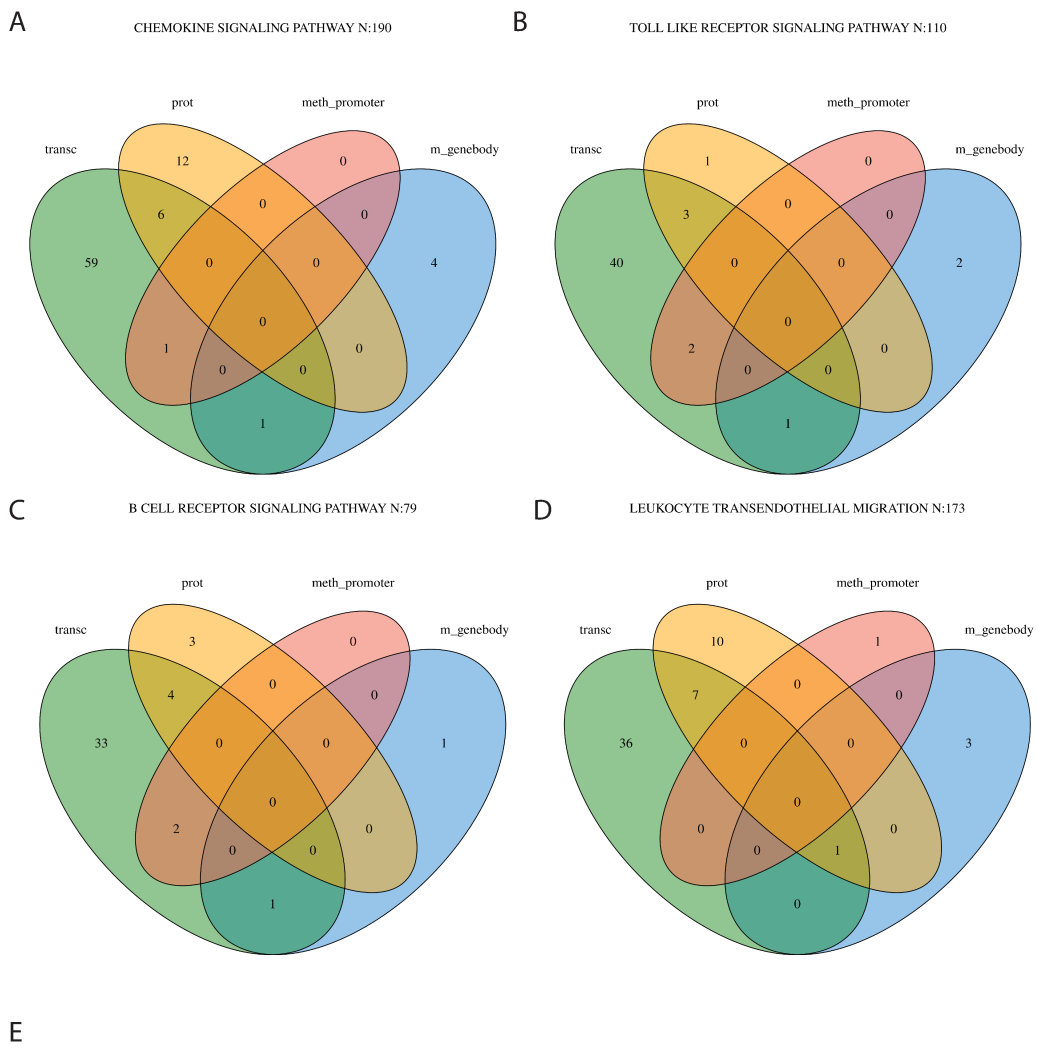

All Genes in Significant Pathways (N: 1100)

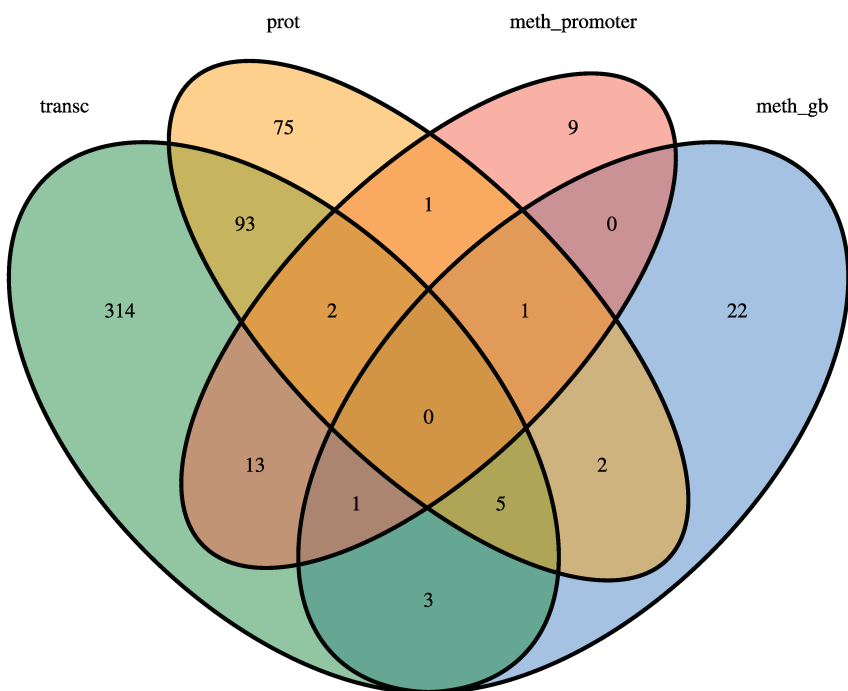

Supplement: gutjnl-2021-324603supp016_data_supplement.pdf [file gutjnl-2021-324603supp016_data_supplement.pdf]
